# Supplementary material for: The yeast RNA methylation complex consists of conserved yet reconfigured components with m6A-dependent and independent roles
Source: bioRxiv preprint, doi:10.1101/2023.02.10.528004, version 2 (2023-06-02)
Supplement: Table S1 [file 528004_file03.xlsx]

## Sheet: Mum2-IP
Protein names	Gene names	Fasta headers	iBAQ	Intensity	Score	MS/MS count	Unique peptides Kar4_1	Razor + unique peptides Kar4_1	Unique peptides Mum2_1	Razor + unique peptides Mum2_1	Unique peptides WT_01	Razor + unique peptides WT_01	-Log t-test p value log2 [Mum2/WT] s0=0.5	t-test Difference log2 [Mum2/WT] s0=0.5	LFQ Kar4_1	LFQ Kar4_2	LFQ Kar4_3	LFQ Mum2_1	LFQ Mum2_2	LFQ Mum2_3	LFQ WT_01	LFQ WT_02	LFQ WT_03
Alcohol dehydrogenase 1	ADH1	ADH1_YEAST Alcohol dehydrogenase 1 OS=Saccharomyces cerevisiae (strain ATCC 204508 / S288c) OX=559292 GN=ADH1 PE=1 SV=5	8.69714	9.9276	249.17	49	4	7	4	6	4	6	5.17342	-1.73116	4.25671	4.66338	5.32724	4.11479	4.07447	3.9958	5.75023	5.88135	5.74695
Alcohol dehydrogenase 2	ADH2	ADH2_YEAST Alcohol dehydrogenase 2 OS=Saccharomyces cerevisiae (strain ATCC 204508 / S288c) OX=559292 GN=ADH2 PE=1 SV=3	7.55534	8.78579	150.87	30	3	3	3	3	3	3	1.26739	-0.482672	0.940695	1.71523	2.21723	0.290493	0.641487	0.523455	0.731487	1.2343	0.937662
Glyceraldehyde-3-phosphate dehydrogenase 2	TDH2	G3P2_YEAST Glyceraldehyde-3-phosphate dehydrogenase 2 OS=Saccharomyces cerevisiae (strain ATCC 204508 / S288c) OX=559292 GN=TDH2 PE=1 SV=3	7.36678	8.66781	39.833	12	1	1	1	1	0	0	0.316161	1.59491	0.821093	0.731195	1.22648	0.577101	0.513536	0.64983	-5.13705	0.858543	1.23423
Glyceraldehyde-3-phosphate dehydrogenase 3	TDH3	G3P3_YEAST Glyceraldehyde-3-phosphate dehydrogenase 3 OS=Saccharomyces cerevisiae (strain ATCC 204508 / S288c) OX=559292 GN=TDH3 PE=1 SV=3	8.67398	9.97501	323.31	113	3	10	3	11	3	8	1.45014	-0.451604	4.96498	5.0514	5.59981	4.66282	4.75635	4.88616	5.3661	5.33198	4.96206
Glyceraldehyde-3-phosphate dehydrogenase 1	TDH1	G3P1_YEAST Glyceraldehyde-3-phosphate dehydrogenase 1 OS=Saccharomyces cerevisiae (strain ATCC 204508 / S288c) OX=559292 GN=TDH1 PE=1 SV=3	6.08625	7.42869	29.87	5	1	1	1	1	0	0	0.136259	0.323996	-2.50167	-1.94752	-2.07939	-3.37391	-6.14295	-5.81384	-5.60384	-5.32152	-5.37732
Pyruvate kinase 1	CDC19	KPYK1_YEAST Pyruvate kinase 1 OS=Saccharomyces cerevisiae (strain ATCC 204508 / S288c) OX=559292 GN=CDC19 PE=1 SV=2	8.01883	9.46598	277.53	83	10	10	6	6	8	8	2.45189	-0.889283	3.02993	3.13228	3.73196	3.02489	3.20213	2.72571	3.93324	3.7996	3.88774
Enolase 1	ENO1	ENO1_YEAST Enolase 1 OS=Saccharomyces cerevisiae (strain ATCC 204508 / S288c) OX=559292 GN=ENO1 PE=1 SV=3	6.34292	7.64396	10.94	2	1	1	1	1	0	0	0.409606	0.819919	-5.52002	-2.04355	-2.57328	-5.84252	-3.71158	-6.29269	-6.69759	-5.77286	-5.83609
Enolase 2	ENO2	ENO2_YEAST Enolase 2 OS=Saccharomyces cerevisiae (strain ATCC 204508 / S288c) OX=559292 GN=ENO2 PE=1 SV=2	7.60786	8.90889	242.65	36	2	7	4	7	0	3	0.591353	0.37053	1.79507	2.18131	2.50831	1.10221	1.12736	0.930759	1.20122	0.274759	0.572758
Triosephosphate isomerase	TPI1	TPIS_YEAST Triosephosphate isomerase OS=Saccharomyces cerevisiae (strain ATCC 204508 / S288c) OX=559292 GN=TPI1 PE=1 SV=2	6.91959	7.99877	140.91	13	2	2	0	0	0	0	1.00391	3.70718	-1.01815	-0.637894	-0.0899181	-6.3373	-1.41397	-0.998341	-6.12971	-6.8304	-6.91105
Phosphoglycerate mutase 1	GPM1	PMG1_YEAST Phosphoglycerate mutase 1 OS=Saccharomyces cerevisiae (strain ATCC 204508 / S288c) OX=559292 GN=GPM1 PE=1 SV=3	7.86887	9.01498	89.579	18	3	3	4	4	4	4	1.36262	-0.450703	1.84463	1.78069	2.82348	1.37063	1.61444	1.51045	1.73922	1.9006	2.20782
Tubulin beta chain	TUB2	TBB_YEAST Tubulin beta chain OS=Saccharomyces cerevisiae (strain ATCC 204508 / S288c) OX=559292 GN=TUB2 PE=1 SV=2	7.07383	8.24991	15.007	5	2	2	1	1	2	2	0.839799	-0.355923	-0.0910969	-5.06377	-5.19973	-0.531139	-0.494709	-0.662233	-0.0340691	0	-0.586245
Elongation factor 1-alpha	TEF1	EF1A_YEAST Elongation factor 1-alpha OS=Saccharomyces cerevisiae (strain ATCC 204508 / S288c) OX=559292 GN=TEF1 PE=1 SV=1	8.57938	9.92181	323.31	100	10	10	8	8	8	8	1.95865	-0.732803	4.55389	4.9616	5.42517	4.33096	4.69268	4.40214	4.96987	5.29506	5.35926
Polyadenylate-binding protein, cytoplasmic and nuclear	PAB1	PABP_YEAST Polyadenylate-binding protein, cytoplasmic and nuclear OS=Saccharomyces cerevisiae (strain ATCC 204508 / S288c) OX=559292 GN=PAB1 PE=1 SV=4	5.92794	7.4331	75.541	4	0	0	1	1	0	0	1.78032	3.39754	-5.95064	-5.47169	-5.64609	-1.95807	-2.14673	-2.09068	-3.75385	-6.28132	-6.35292
Ubiquitin-60S ribosomal protein L40;Ubiquitin;60S ribosomal protein L40;Ubiquitin-40S ribosomal protein S31;Ubiquitin;40S ribosomal protein S31;Polyubiquitin;Ubiquitin	RPL40B;RPL40A;RPS31;UBI4	RL40B_YEAST Ubiquitin-60S ribosomal protein L40 OS=Saccharomyces cerevisiae (strain ATCC 204508 / S288c) OX=559292 GN=RPL40B PE=1 SV=1;RL40A_YEAST Ubiquitin-60S ribosomal protein L40 OS=Saccharomyces cerevisiae (strain ATCC 204508 / S288c) OX=559292 GN=RPL	7.64847	8.42663	138.92	11	2	2	4	4	0	0	0.578421	2.96022	-1.95655	-1.75078	-0.865692	1.01991	0.216566	0.582632	-6.85997	-0.554691	0.353102
Pyruvate decarboxylase isozyme 1	PDC1	PDC1_YEAST Pyruvate decarboxylase isozyme 1 OS=Saccharomyces cerevisiae (strain ATCC 204508 / S288c) OX=559292 GN=PDC1 PE=1 SV=7	6.78896	8.23611	60.169	17	2	2	2	2	2	2	1.73474	-0.689721	-0.763041	-0.289812	-0.0653667	-1.46717	-0.92041	-1.38952	-0.462872	-0.597057	-0.648014
ATP synthase subunit alpha, mitochondrial	ATP1	ATPA_YEAST ATP synthase subunit alpha, mitochondrial OS=Saccharomyces cerevisiae (strain ATCC 204508 / S288c) OX=559292 GN=ATP1 PE=1 SV=5	7.28274	8.75986	155.52	43	4	4	6	6	5	5	0.297564	-0.308599	0.435104	0.723236	1.7738	0.435947	1.27889	0.874218	1.18824	1.75769	0.568924
Protein URA2;Glutamine-dependent carbamoyl-phosphate synthase;Aspartate carbamoyltransferase	URA2	PYR1_YEAST Protein URA2 OS=Saccharomyces cerevisiae (strain ATCC 204508 / S288c) OX=559292 GN=URA2 PE=1 SV=5	5.45019	7.5401	10.778	4	1	1	1	1	1	1	1.96446	-0.826021	-3.42948	-3.12718	-2.73273	-3.31785	-3.51187	-3.30434	-2.22037	-2.79048	-2.64516
Tubulin alpha-3 chain;Tubulin alpha-1 chain	TUB3;TUB1	TBA3_YEAST Tubulin alpha-3 chain OS=Saccharomyces cerevisiae (strain ATCC 204508 / S288c) OX=559292 GN=TUB3 PE=1 SV=1;TBA1_YEAST Tubulin alpha-1 chain OS=Saccharomyces cerevisiae (strain ATCC 204508 / S288c) OX=559292 GN=TUB1 PE=1 SV=2	6.24908	7.55012	279.38	11	1	1	1	1	1	1	1.04181	-0.555819	-3.52985	-2.94821	-3.33105	-3.00246	-3.36985	-3.06197	-2.36096	-2.37046	-3.03541
Uncharacterized protein YGL041W-A, mitochondrial	YGL041W-A	YG41A_YEAST Uncharacterized protein YGL041W-A, mitochondrial OS=Saccharomyces cerevisiae (strain ATCC 204508 / S288c) OX=559292 GN=YGL041W-A PE=1 SV=2	5.88431	6.72942	5.9511	1	0	0	0	0	0	0	0.0797987	-0.33113	-6.95965	-6.42751	-4.32263	-7.49664	-4.40577	-3.92745	-6.83446	-3.98412	-4.01789
Putative uncharacterized protein YLL053C		YLL53_YEAST Putative uncharacterized protein YLL053C OS=Saccharomyces cerevisiae (strain ATCC 204508 / S288c) OX=559292 GN=YLL053C PE=5 SV=1	10.6268	11.2288	6.3234	81	1	1	1	1	1	1	0.995898	-4.82788	6.92277	1.37111	7.59309	7.84813	7.11225	1.16202	11.0189	8.54239	11.0448
Heat shock protein SSC1, mitochondrial	SSC1	HSP77_YEAST Heat shock protein SSC1, mitochondrial OS=Saccharomyces cerevisiae (strain ATCC 204508 / S288c) OX=559292 GN=SSC1 PE=1 SV=1	6.34029	7.83165	23.015	9	0	0	4	4	1	1	0.379925	0.543164	-6.43576	-5.93124	-1.3228	-1.53688	-2.0257	-1.05826	-3.12918	-1.39329	-1.72786
Heat shock protein SSA1;Heat shock protein SSA2	SSA1;SSA2	HSP71_YEAST Heat shock protein SSA1 OS=Saccharomyces cerevisiae (strain ATCC 204508 / S288c) OX=559292 GN=SSA1 PE=1 SV=4;HSP72_YEAST Heat shock protein SSA2 OS=Saccharomyces cerevisiae (strain ATCC 204508 / S288c) OX=559292 GN=SSA2 PE=1 SV=3	7.29594	8.84001	193.61	38	2	2	6	6	2	2	1.58928	0.843833	0.447441	0.641937	1.07063	1.71237	2.0755	1.50181	1.25834	0.837904	0.66194
Phosphoenolpyruvate carboxykinase [ATP]	PCK1	PCKA_YEAST Phosphoenolpyruvate carboxykinase (ATP) OS=Saccharomyces cerevisiae (strain ATCC 204508 / S288c) OX=559292 GN=PCK1 PE=1 SV=2	7.24356	8.69071	112.92	28	7	7	2	2	1	1	0.179403	0.552862	1.92084	1.82932	2.412	-0.371836	-1.04604	-3.76493	-2.64989	-1.20748	-2.98402
Glucose-6-phosphate isomerase	PGI1	G6PI_YEAST Glucose-6-phosphate isomerase OS=Saccharomyces cerevisiae (strain ATCC 204508 / S288c) OX=559292 GN=PGI1 PE=1 SV=3	6.23241	7.63036	80.078	14	2	2	2	2	1	1	0.0983775	0.0711358	-2.70558	-2.60098	-1.98446	-3.31205	-2.54189	-2.90472	-2.73074	-3.16922	-3.07211
Fructose-bisphosphate aldolase	FBA1	ALF_YEAST Fructose-bisphosphate aldolase OS=Saccharomyces cerevisiae (strain ATCC 204508 / S288c) OX=559292 GN=FBA1 PE=1 SV=3	7.17176	8.37588	90.347	8	3	3	1	1	1	1	0.437639	0.274988	-0.186386	-0.0338821	0.28553	-0.29392	-0.442291	-0.390274	-0.305088	-0.473099	-1.17326
Glutamine--fructose-6-phosphate aminotransferase [isomerizing]	GFA1	GFA1_YEAST Glutamine--fructose-6-phosphate aminotransferase [isomerizing] OS=Saccharomyces cerevisiae (strain ATCC 204508 / S288c) OX=559292 GN=GFA1 PE=1 SV=4	6.26869	7.85976	27.426	3	2	2	1	1	1	1	2.47973	-1.27564	-1.76583	-2.32752	-1.60129	-2.29598	-2.84917	-2.82451	-1.19591	-1.50612	-1.44072
ATP-dependent molecular chaperone HSC82;ATP-dependent molecular chaperone HSP82	HSC82;HSP82	HSC82_YEAST ATP-dependent molecular chaperone HSC82 OS=Saccharomyces cerevisiae (strain ATCC 204508 / S288c) OX=559292 GN=HSC82 PE=1 SV=4;HSP82_YEAST ATP-dependent molecular chaperone HSP82 OS=Saccharomyces cerevisiae (strain ATCC 204508 / S288c) OX=559292	5.99997	7.56817	53.006	8	2	2	1	1	1	1	0.650087	2.24115	-2.44411	-2.74439	-1.90723	-3.41063	-4.08808	-2.42103	-2.58513	-6.9874	-7.07064
rRNA 2-O-methyltransferase fibrillarin	NOP1	FBRL_YEAST rRNA 2-O-methyltransferase fibrillarin OS=Saccharomyces cerevisiae (strain ATCC 204508 / S288c) OX=559292 GN=NOP1 PE=1 SV=1	5.86409	7.06822	5.9054	2	0	0	1	1	1	1	0.131025	-0.612937	-4.244	-3.85501	-3.59962	-3.98817	-3.9802	-7.41472	-2.86493	-3.63378	-7.04557
V-type proton ATPase subunit B	VMA2	VATB_YEAST V-type proton ATPase subunit B OS=Saccharomyces cerevisiae (strain ATCC 204508 / S288c) OX=559292 GN=VMA2 PE=1 SV=2	6.57529	8.03771	34.192	7	3	3	0	0	1	1	0.158	-1.17085	-0.44058	-0.476635	-1.01748	-6.8947	-6.64337	-0.710306	-0.369144	-6.96274	-3.40395
Small COPII coat GTPase SAR1	SAR1	SAR1_YEAST Small COPII coat GTPase SAR1 OS=Saccharomyces cerevisiae (strain ATCC 204508 / S288c) OX=559292 GN=SAR1 PE=1 SV=1	7.2402	8.35413	28.718	14	1	1	1	1	2	2	0.926292	-0.16267	-7.10944	-0.520264	-0.211308	-0.218344	-0.151371	-0.210047	0	0.0889168	-0.180668
Malate dehydrogenase, cytoplasmic	MDH2	MDHC_YEAST Malate dehydrogenase, cytoplasmic OS=Saccharomyces cerevisiae (strain ATCC 204508 / S288c) OX=559292 GN=MDH2 PE=1 SV=2	5.71762	6.86375	9.3036	2	1	1	0	0	0	0	0.969146	-2.24662	-3.45377	-3.36754	-6.69196	-4.37637	-7.81593	-6.83215	-4.32512	-3.38013	-4.57934
Protein SPA2	SPA2	SPA2_YEAST Protein SPA2 OS=Saccharomyces cerevisiae (strain ATCC 204508 / S288c) OX=559292 GN=SPA2 PE=1 SV=1	8.26117	10.1855	323.31	180	11	11	16	16	13	13	2.61776	0.855947	5.29264	5.40722	5.93792	6.02531	6.27462	5.94381	5.37725	5.13607	5.16257
Karyogamy protein KAR4	KAR4	KAR4_YEAST Karyogamy protein KAR4 OS=Saccharomyces cerevisiae (strain ATCC 204508 / S288c) OX=559292 GN=KAR4 PE=1 SV=1	9.2447	10.5	323.31	135	4	4	23	23	0	0	4.23633	14.1921	-1.91879	-4.74909	-3.10935	8.0835	8.21187	7.93606	-6.79826	-4.53647	-7.00999
Transcription elongation factor SPT5	SPT5	SPT5_YEAST Transcription elongation factor SPT5 OS=Saccharomyces cerevisiae (strain ATCC 204508 / S288c) OX=559292 GN=SPT5 PE=1 SV=1	5.97216	7.66236	73.915	9	1	1	1	1	1	1	0.00715906	0.040627	-3.15301	-2.81173	-1.78591	-3.94157	-3.66752	-2.30776	-1.73525	-6.92774	-1.37574
Protein BMH1;Protein BMH2	BMH1;BMH2	BMH1_YEAST Protein BMH1 OS=Saccharomyces cerevisiae (strain ATCC 204508 / S288c) OX=559292 GN=BMH1 PE=1 SV=4;BMH2_YEAST Protein BMH2 OS=Saccharomyces cerevisiae (strain ATCC 204508 / S288c) OX=559292 GN=BMH2 PE=1 SV=3	6.26012	7.43621	20.329	6	1	1	1	1	0	0	5.07977	2.44367	-7.08591	-1.90819	-2.80278	-3.47049	-3.3155	-3.45039	-5.72405	-5.88909	-5.95424
Cystathionine gamma-lyase	CYS3	CYS3_YEAST Cystathionine gamma-lyase OS=Saccharomyces cerevisiae (strain ATCC 204508 / S288c) OX=559292 GN=CYS3 PE=1 SV=2	6.35245	7.55658	14.239	6	1	1	1	1	0	0	5.75432	4.37095	-2.97573	-1.87235	-2.44833	-2.75593	-2.99501	-2.74078	-7.09272	-7.21245	-7.29939
Coatomer subunit gamma	SEC21	COPG_YEAST Coatomer subunit gamma OS=Saccharomyces cerevisiae (strain ATCC 204508 / S288c) OX=559292 GN=SEC21 PE=1 SV=2	7.1014	8.79161	323.31	52	10	10	6	6	4	4	1.1823	0.506385	1.68008	2.2136	2.35888	0.218344	0.414864	-0.0683956	-0.137859	-0.212771	-0.603712
Glycerol-3-phosphate dehydrogenase, mitochondrial	GUT2	GPDM_YEAST Glycerol-3-phosphate dehydrogenase, mitochondrial OS=Saccharomyces cerevisiae (strain ATCC 204508 / S288c) OX=559292 GN=GUT2 PE=1 SV=2	5.81536	7.41742	14.275	7	1	1	1	1	1	1	1.32087	-0.678118	-3.7554	-3.57582	-3.15339	-3.97753	-3.56659	-3.58769	-2.63296	-3.23976	-3.22473
Acetyl-CoA hydrolase	ACH1	ACH1_YEAST Acetyl-CoA hydrolase OS=Saccharomyces cerevisiae (strain ATCC 204508 / S288c) OX=559292 GN=ACH1 PE=1 SV=2	6.36186	7.7598	17.534	14	1	1	1	1	1	1	0.336713	-0.197041	-2.54286	-2.14592	-2.03231	-2.44951	-2.22542	-2.61542	-1.83024	-2.31152	-2.55747
Elongation factor 2	EFT1	EF2_YEAST Elongation factor 2 OS=Saccharomyces cerevisiae (strain ATCC 204508 / S288c) OX=559292 GN=EFT1 PE=1 SV=1	5.89026	7.55301	70.935	6	1	1	0	0	0	0	0.0408973	0.206291	-2.61666	-1.93098	-1.8395	-7.66876	-2.38995	-2.67168	-4.29404	-4.50643	-4.5488
Protein DCG1	DCG1	DCG1_YEAST Protein DCG1 OS=Saccharomyces cerevisiae (strain ATCC 204508 / S288c) OX=559292 GN=DCG1 PE=2 SV=1	8.19042	9.30436	9.7031	12	1	1	1	1	1	1	0.0760907	-0.731493	0.422289	0.823027	6.01343	-7.64173	0.343872	0.754108	0.669289	-5.42738	0.408829
RNA polymerase II degradation factor 1	DEF1	DEF1_YEAST RNA polymerase II degradation factor 1 OS=Saccharomyces cerevisiae (strain ATCC 204508 / S288c) OX=559292 GN=DEF1 PE=1 SV=1	6.03326	7.23739	11.456	2	0	0	0	0	1	1	0.563012	-2.27818	-3.66773	-6.56941	-6.14893	-3.71424	-7.20713	-4.39488	-1.05571	-5.68754	-1.73845
Protein PET10	PET10	PET10_YEAST Protein PET10 OS=Saccharomyces cerevisiae (strain ATCC 204508 / S288c) OX=559292 GN=PET10 PE=1 SV=3	6.64839	7.92714	81.98	14	2	2	1	1	0	0	0.419748	-2.31439	-4.771	-6.54712	0.323303	-1.46552	-4.6601	-7.5813	-5.24653	-0.0563068	-1.4609
ATP synthase subunit gamma, mitochondrial	ATP3	ATPG_YEAST ATP synthase subunit gamma, mitochondrial OS=Saccharomyces cerevisiae (strain ATCC 204508 / S288c) OX=559292 GN=ATP3 PE=1 SV=1	6.6491	7.90437	259.46	19	1	1	1	1	1	1	2.22914	-1.15929	-2.5682	-2.09063	-1.57243	-2.48198	-1.87259	-2.36968	-0.864706	-1.17027	-1.2114
Protein MUM2	MUM2	MUM2_YEAST Protein MUM2 OS=Saccharomyces cerevisiae (strain ATCC 204508 / S288c) OX=559292 GN=MUM2 PE=1 SV=1	9.91564	11.0917	323.31	180	2	2	26	26	0	0	6.406	15.3311	-2.63214	-1.82913	-3.4205	9.97596	10.1525	10.0831	-5.5156	-4.78112	-5.48493
40S ribosomal protein S20	RPS20	RS20_YEAST 40S ribosomal protein S20 OS=Saccharomyces cerevisiae (strain ATCC 204508 / S288c) OX=559292 GN=RPS20 PE=1 SV=3	6.79248	7.69557	323.31	14	0	0	1	1	1	1	0.61605	1.02687	-7.05252	-2.33455	-1.91777	-2.33587	-1.74419	-2.23956	-4.57814	-2.28801	-2.53409
Putative proline--tRNA ligase YHR020W	YHR020W	YHI0_YEAST Putative proline--tRNA ligase YHR020W OS=Saccharomyces cerevisiae (strain ATCC 204508 / S288c) OX=559292 GN=YHR020W PE=1 SV=1	7.37794	8.98	11.064	2	1	1	1	1	0	0	0.137415	1.67226	2.41805	2.05703	-3.87709	2.31093	-7.99001	2.23136	-5.72736	3.01225	-5.74937
26S proteasome regulatory subunit RPN1	RPN1	RPN1_YEAST 26S proteasome regulatory subunit RPN1 OS=Saccharomyces cerevisiae (strain ATCC 204508 / S288c) OX=559292 GN=RPN1 PE=1 SV=3	5.89114	7.58134	7.2171	2	1	1	0	0	0	0	1.20806	-4.19054	-6.06154	-0.904734	-6.84723	-4.98189	-7.96266	-7.55513	-5.31068	-1.45476	-1.16264
Eukaryotic translation initiation factor 5B	FUN12	IF2P_YEAST Eukaryotic translation initiation factor 5B OS=Saccharomyces cerevisiae (strain ATCC 204508 / S288c) OX=559292 GN=FUN12 PE=1 SV=2	6.49543	8.0975	145.28	25	2	2	3	3	2	2	0.760249	-0.583272	-1.82648	-1.40955	-0.523464	-1.42729	-1.28269	-1.58841	-0.20748	-1.37299	-0.968113
13 kDa ribonucleoprotein-associated protein	SNU13	SNU13_YEAST 13 kDa ribonucleoprotein-associated protein OS=Saccharomyces cerevisiae (strain ATCC 204508 / S288c) OX=559292 GN=SNU13 PE=1 SV=1	6.99706	7.84217	184.88	12	1	1	1	1	1	1	0.603619	-0.356783	-3.30249	-3.1222	-2.18571	-1.48706	-1.93461	-2.28144	-1.28795	-1.72205	-1.62276
Protein PEA2	PEA2	PEA2_YEAST Protein PEA2 OS=Saccharomyces cerevisiae (strain ATCC 204508 / S288c) OX=559292 GN=PEA2 PE=1 SV=1	8.95156	10.3495	323.31	200	16	16	23	23	14	14	2.95657	0.731795	5.76856	5.97687	6.64956	6.43475	6.71986	6.64988	5.87969	5.89082	5.83859
Heat shock protein SSB2	SSB2	SSB2_YEAST Ribosome-associated molecular chaperone SSB2 OS=Saccharomyces cerevisiae (strain ATCC 204508 / S288c) OX=559292 GN=SSB2 PE=1 SV=2	7.51812	8.99524	180.02	39	0	4	0	7	0	4	1.77467	1.20755	0.924229	1.24978	1.41246	2.61694	2.1732	2.32205	1.68735	0.749006	1.05318
Sporulation-specific with a leucine zipper motif protein 1	SLZ1	SLZ1_YEAST Sporulation-specific with a leucine zipper motif protein 1 OS=Saccharomyces cerevisiae (strain ATCC 204508 / S288c) OX=559292 GN=SLZ1 PE=1 SV=1	7.74981	8.79121	133.12	23	1	1	7	7	0	0	0.5862	2.87009	0.408874	0.637871	0.648573	2.32122	1.31939	1.19954	-5.56457	1.0605	0.733954
Coatomer subunit epsilon	SEC28	COPE_YEAST Coatomer subunit epsilon OS=Saccharomyces cerevisiae (strain ATCC 204508 / S288c) OX=559292 GN=SEC28 PE=1 SV=2	7.19918	8.34531	303.31	23	4	4	3	3	0	0	1.09359	3.41082	0.218845	1.03685	1.07388	-1.40375	-1.4427	-1.60792	-6.78361	-5.89229	-2.01091
Coatomer subunit beta	SEC26	COPB_YEAST Coatomer subunit beta OS=Saccharomyces cerevisiae (strain ATCC 204508 / S288c) OX=559292 GN=SEC26 PE=1 SV=2	7.21588	8.88798	323.31	28	9	9	1	1	0	0	1.05078	3.41763	1.78567	2.56357	3.58475	-1.02136	0.151369	0.0683956	-5.479	-0.747463	-4.82802
Coatomer subunit beta	SEC27	COPB2_YEAST Coatomer subunit beta OS=Saccharomyces cerevisiae (strain ATCC 204508 / S288c) OX=559292 GN=SEC27 PE=1 SV=1	6.64395	8.29715	54.693	12	2	2	1	1	0	0	1.77545	3.33211	0.22982	0.654308	1.35212	-1.4856	-3.99042	-1.51697	-5.54243	-5.4894	-5.95749
N6-adenosine-methyltransferase IME4	IME4	IME4_YEAST N6-adenosine-methyltransferase IME4 OS=Saccharomyces cerevisiae (strain ATCC 204508 / S288c) OX=559292 GN=IME4 PE=1 SV=1	8.95073	10.4279	323.31	103	1	1	21	21	0	0	2.93967	12.6757	-4.06284	-3.30912	-3.36207	8.27124	3.80579	8.40739	-6.25988	-5.73489	-5.54797
Isocitrate dehydrogenase [NADP] cytoplasmic	IDP2	IDHC_YEAST Isocitrate dehydrogenase [NADP] cytoplasmic OS=Saccharomyces cerevisiae (strain ATCC 204508 / S288c) OX=559292 GN=IDP2 PE=1 SV=2	6.76918	8.21632	63.184	15	2	2	2	2	2	2	1.30416	-0.536233	-0.646147	0.0338802	-0.27169	-1.51887	-1.11896	-1.5853	-0.741308	-0.749487	-1.12364
Coatomer subunit delta	RET2	COPD_YEAST Coatomer subunit delta OS=Saccharomyces cerevisiae (strain ATCC 204508 / S288c) OX=559292 GN=RET2 PE=1 SV=3	6.94658	8.22534	92.015	6	2	2	1	1	0	0	0.0350578	0.169803	0.0910969	0.355858	1.19165	-2.2144	-5.27252	-3.75406	-4.72667	-1.22623	-5.7975
Potassium-activated aldehyde dehydrogenase, mitochondrial	ALD4	ALDH4_YEAST Potassium-activated aldehyde dehydrogenase, mitochondrial OS=Saccharomyces cerevisiae (strain ATCC 204508 / S288c) OX=559292 GN=ALD4 PE=1 SV=2	6.59551	8.07262	28.276	18	1	1	2	2	1	1	0.506613	0.301292	-1.61196	-1.73995	-1.21896	-1.51149	-0.682842	-1.03034	-1.38354	-1.54582	-1.19919
Glutamate--tRNA ligase, cytoplasmic	GUS1	SYEC_YEAST Glutamate--tRNA ligase, cytoplasmic OS=Saccharomyces cerevisiae (strain ATCC 204508 / S288c) OX=559292 GN=GUS1 PE=1 SV=3	7.97109	9.6243	323.31	91	22	22	6	6	4	4	3.67948	1.50552	4.35731	4.87431	5.60161	2.80054	3.16692	2.85866	1.47975	1.38696	1.44286
tRNA-aminoacylation cofactor ARC1	ARC1	ARC1_YEAST tRNA-aminoacylation cofactor ARC1 OS=Saccharomyces cerevisiae (strain ATCC 204508 / S288c) OX=559292 GN=ARC1 PE=1 SV=2	8.1602	9.54042	323.31	41	6	6	4	4	2	2	1.92824	1.18592	4.14369	4.27863	4.84096	2.19391	2.38598	2.10637	1.55476	0.832401	0.741333
Biotin--protein ligase;Biotin--[methylmalonyl-CoA-carboxytransferase] ligase;Biotin--[propionyl-CoA-carboxylase [ATP-hydrolyzing]] ligase;Biotin--[methylcrotonoyl-CoA-carboxylase] ligase;Biotin--[acetyl-CoA-carboxylase] ligase	BPL1	BPL1_YEAST Biotin--protein ligase OS=Saccharomyces cerevisiae (strain ATCC 204508 / S288c) OX=559292 GN=BPL1 PE=1 SV=1	11.49	12.9952	323.31	3254	52	52	52	52	49	49	2.29342	-0.489767	13.911	14.2088	14.6196	14.155	14.3631	14.1977	14.8486	14.6847	14.6518
DNA replication licensing factor MCM6	MCM6	MCM6_YEAST DNA replication licensing factor MCM6 OS=Saccharomyces cerevisiae (strain ATCC 204508 / S288c) OX=559292 GN=MCM6 PE=1 SV=2	5.40799	7.14836	14.621	7	1	1	2	2	1	1	0.320209	-1.37577	-2.61837	-3.39028	-6.82284	-7.60335	-7.92385	-4.98092	-2.47166	-6.91357	-6.99559
NADPH-dependent aldehyde reductase ARI1	ARI1	ARI1_YEAST NADPH-dependent aldehyde reductase ARI1 OS=Saccharomyces cerevisiae (strain ATCC 204508 / S288c) OX=559292 GN=ARI1 PE=1 SV=1	9.39115	10.6922	6.3081	9	1	1	1	1	1	1	2.87736	-0.908449	7.09905	7.37032	7.82824	6.887	7.15046	6.92918	8.05518	7.82122	7.81559
Uncharacterized protein YGL036W	YGL036W	YG036_YEAST Uncharacterized protein YGL036W OS=Saccharomyces cerevisiae (strain ATCC 204508 / S288c) OX=559292 GN=YGL036W PE=1 SV=1	9.33262	10.9237	323.31	193	1	1	38	38	0	0	5.20441	14.5986	-1.81663	-1.27755	-1.95351	9.39458	9.43332	9.59756	-4.2105	-5.4465	-5.7134
Coatomer subunit zeta	RET3	COPZ_YEAST Coatomer subunit zeta OS=Saccharomyces cerevisiae (strain ATCC 204508 / S288c) OX=559292 GN=RET3 PE=1 SV=1	6.98826	7.89135	223.37	13	3	3	0	0	0	0	1.77048	-1.31715	-0.672487	-0.396515	-0.0633545	-6.46472	-6.77225	-7.51799	-5.37561	-5.65215	-5.77574
Coatomer subunit alpha	COP1	COPA_YEAST Coatomer subunit alpha OS=Saccharomyces cerevisiae (strain ATCC 204508 / S288c) OX=559292 GN=COP1 PE=1 SV=2	6.26038	8.03854	32.507	14	1	1	2	2	1	1	0.276854	-0.327484	-0.848431	-0.509293	0	-2.80582	-2.07362	-2.72904	-1.39857	-2.46103	-2.76643
Actin-related protein 5	ARP5	ARP5_YEAST Actin-related protein 5 OS=Saccharomyces cerevisiae (strain ATCC 204508 / S288c) OX=559292 GN=ARP5 PE=1 SV=1	7.91972	9.42487	6.3369	4	1	1	1	1	1	1	0.0815679	-1.16026	3.24871	3.36353	3.84331	3.45692	-8.23953	3.33264	4.07082	-5.71348	3.67347
Actin	ACT1	ACT_YEAST Actin OS=Saccharomyces cerevisiae (strain ATCC 204508 / S288c) OX=559292 GN=ACT1 PE=1 SV=1	7.45512	8.75615	63.057	34	4	4	3	3	3	3	3.70834	-0.974654	0.682728	0.86722	1.53268	0.562283	0.694393	0.441694	1.51301	1.54843	1.56089
Succinate dehydrogenase [ubiquinone] flavoprotein subunit, mitochondrial	SDH1	SDHA_YEAST Succinate dehydrogenase [ubiquinone] flavoprotein subunit, mitochondrial OS=Saccharomyces cerevisiae (strain ATCC 204508 / S288c) OX=559292 GN=SDH1 PE=1 SV=1	5.85687	7.36203	10.969	3	1	1	1	1	0	0	0.375711	-1.27932	-2.85397	-1.881	-1.74713	-7.91547	-5.23921	-6.41601	-2.84469	-6.40718	-6.48086
Acetyl-CoA carboxylase;Biotin carboxylase	ACC1	ACAC_YEAST Acetyl-CoA carboxylase OS=Saccharomyces cerevisiae (strain ATCC 204508 / S288c) OX=559292 GN=ACC1 PE=1 SV=2	7.49542	9.59923	323.31	133	35	35	12	12	7	7	1.95233	1.82405	4.89769	4.91006	4.87484	2.69307	2.76565	2.20083	1.18659	1.00081	0
Nucleolar protein 3	NPL3	NOP3_YEAST Nucleolar protein 3 OS=Saccharomyces cerevisiae (strain ATCC 204508 / S288c) OX=559292 GN=NPL3 PE=1 SV=1	6.87163	8.23335	168.76	4	0	0	1	1	0	0	2.24963	6.72556	-7.32416	-4.35423	-3.27977	0.609064	0.878262	0.16884	-8.62178	-4.92473	-4.97399
Acetyl-coenzyme A synthetase 1	ACS1	ACS1_YEAST Acetyl-coenzyme A synthetase 1 OS=Saccharomyces cerevisiae (strain ATCC 204508 / S288c) OX=559292 GN=ACS1 PE=1 SV=2	8.28005	9.82411	323.31	161	14	15	16	17	18	19	1.28867	-0.357504	4.17659	4.50016	4.76373	4.39801	4.44788	4.47984	5.05371	4.69572	4.64881
Dynein light chain 1, cytoplasmic	DYN2	DYL1_YEAST Dynein light chain 1, cytoplasmic OS=Saccharomyces cerevisiae (strain ATCC 204508 / S288c) OX=559292 GN=DYN2 PE=1 SV=1	7.02173	7.79986	11.222	4	0	0	2	2	0	0	2.05304	4.53107	-4.74233	-6.51548	-4.42335	-0.919506	-0.791616	-0.882381	-7.29435	-4.42565	-4.4667
Diphosphoinositol polyphosphate phosphohydrolase DDP1	DDP1	DDP1_YEAST Diphosphoinositol polyphosphate phosphohydrolase DDP1 OS=Saccharomyces cerevisiae (strain ATCC 204508 / S288c) OX=559292 GN=DDP1 PE=1 SV=3	5.37952	6.42091	6.5838	1	1	1	0	0	0	0	0.0703379	-0.11758	-5.64267	-5.57674	-6.78822	-4.94895	-6.26089	-4.8129	-4.50602	-5.55219	-5.61179
Nuclear polyadenylated RNA-binding protein 4	HRP1	HRP1_YEAST Nuclear polyadenylated RNA-binding protein 4 OS=Saccharomyces cerevisiae (strain ATCC 204508 / S288c) OX=559292 GN=HRP1 PE=1 SV=1	8.04127	9.32004	323.31	36	3	3	3	3	3	3	1.89565	-0.64295	2.12947	2.36423	3.10426	2.81693	2.97379	2.48053	3.46663	3.34546	3.38801

## Sheet: Kar4-IP
Protein names	Gene names	Fasta headers	iBAQ	Intensity	Score	MS/MS count	Unique peptides Kar4_1	Razor + unique peptides Kar4_1	Unique peptides Mum2_1	Razor + unique peptides Mum2_1	Unique peptides WT_01	Razor + unique peptides WT_01	-Log t-test p value log2 [Kar4/WT] s0=0.5	t-test Difference log2 [Kar4/WT] s0=0.5	LFQ Kar4_1	LFQ Kar4_2	LFQ Kar4_3	LFQ Mum2_1	LFQ Mum2_2	LFQ Mum2_3	LFQ WT_01	LFQ WT_02	LFQ WT_03
Alcohol dehydrogenase 1	ADH1	ADH1_YEAST Alcohol dehydrogenase 1 OS=Saccharomyces cerevisiae (strain ATCC 204508 / S288c) OX=559292 GN=ADH1 PE=1 SV=5	8.69714	9.9276	249.17	49	4	7	4	6	4	6	1.52881	-1.04373	4.25671	4.66338	5.32724	4.11479	4.07447	3.9958	5.75023	5.88135	5.74695
Alcohol dehydrogenase 2	ADH2	ADH2_YEAST Alcohol dehydrogenase 2 OS=Saccharomyces cerevisiae (strain ATCC 204508 / S288c) OX=559292 GN=ADH2 PE=1 SV=3	7.55534	8.78579	150.87	30	3	3	3	3	3	3	0.756579	0.656568	0.940695	1.71523	2.21723	0.290493	0.641487	0.523455	0.731487	1.2343	0.937662
Glyceraldehyde-3-phosphate dehydrogenase 2	TDH2	G3P2_YEAST Glyceraldehyde-3-phosphate dehydrogenase 2 OS=Saccharomyces cerevisiae (strain ATCC 204508 / S288c) OX=559292 GN=TDH2 PE=1 SV=3	7.36678	8.66781	39.833	12	1	1	1	1	0	0	0.396409	1.94101	0.821093	0.731195	1.22648	0.577101	0.513536	0.64983	-5.13705	0.858543	1.23423
Glyceraldehyde-3-phosphate dehydrogenase 3	TDH3	G3P3_YEAST Glyceraldehyde-3-phosphate dehydrogenase 3 OS=Saccharomyces cerevisiae (strain ATCC 204508 / S288c) OX=559292 GN=TDH3 PE=1 SV=3	8.67398	9.97501	323.31	113	3	10	3	11	3	8	0.0205848	-0.0146503	4.96498	5.0514	5.59981	4.66282	4.75635	4.88616	5.3661	5.33198	4.96206
Glyceraldehyde-3-phosphate dehydrogenase 1	TDH1	G3P1_YEAST Glyceraldehyde-3-phosphate dehydrogenase 1 OS=Saccharomyces cerevisiae (strain ATCC 204508 / S288c) OX=559292 GN=TDH1 PE=1 SV=3	6.08625	7.42869	29.87	5	1	1	1	1	0	0	4.18565	3.25804	-2.50167	-1.94752	-2.07939	-3.37391	-6.14295	-5.81384	-5.60384	-5.32152	-5.37732
Pyruvate kinase 1	CDC19	KPYK1_YEAST Pyruvate kinase 1 OS=Saccharomyces cerevisiae (strain ATCC 204508 / S288c) OX=559292 GN=CDC19 PE=1 SV=2	8.01883	9.46598	277.53	83	10	10	6	6	8	8	1.21559	-0.575471	3.02993	3.13228	3.73196	3.02489	3.20213	2.72571	3.93324	3.7996	3.88774
Enolase 1	ENO1	ENO1_YEAST Enolase 1 OS=Saccharomyces cerevisiae (strain ATCC 204508 / S288c) OX=559292 GN=ENO1 PE=1 SV=3	6.34292	7.64396	10.94	2	1	1	1	1	0	0	1.14165	2.72323	-5.52002	-2.04355	-2.57328	-5.84252	-3.71158	-6.29269	-6.69759	-5.77286	-5.83609
Enolase 2	ENO2	ENO2_YEAST Enolase 2 OS=Saccharomyces cerevisiae (strain ATCC 204508 / S288c) OX=559292 GN=ENO2 PE=1 SV=2	7.60786	8.90889	242.65	36	2	7	4	7	0	3	1.90558	1.47865	1.79507	2.18131	2.50831	1.10221	1.12736	0.930759	1.20122	0.274759	0.572758
Triosephosphate isomerase	TPI1	TPIS_YEAST Triosephosphate isomerase OS=Saccharomyces cerevisiae (strain ATCC 204508 / S288c) OX=559292 GN=TPI1 PE=1 SV=2	6.91959	7.99877	140.91	13	2	2	0	0	0	0	4.10197	6.04173	-1.01815	-0.637894	-0.0899181	-6.3373	-1.41397	-0.998341	-6.12971	-6.8304	-6.91105
Phosphoglycerate mutase 1	GPM1	PMG1_YEAST Phosphoglycerate mutase 1 OS=Saccharomyces cerevisiae (strain ATCC 204508 / S288c) OX=559292 GN=GPM1 PE=1 SV=3	7.86887	9.01498	89.579	18	3	3	4	4	4	4	0.213529	0.200387	1.84463	1.78069	2.82348	1.37063	1.61444	1.51045	1.73922	1.9006	2.20782
Tubulin beta chain	TUB2	TBB_YEAST Tubulin beta chain OS=Saccharomyces cerevisiae (strain ATCC 204508 / S288c) OX=559292 GN=TUB2 PE=1 SV=2	7.07383	8.24991	15.007	5	2	2	1	1	2	2	0.894474	-3.24476	-0.0910969	-5.06377	-5.19973	-0.531139	-0.494709	-0.662233	-0.0340691	0	-0.586245
Elongation factor 1-alpha	TEF1	EF1A_YEAST Elongation factor 1-alpha OS=Saccharomyces cerevisiae (strain ATCC 204508 / S288c) OX=559292 GN=TEF1 PE=1 SV=1	8.57938	9.92181	323.31	100	10	10	8	8	8	8	0.337174	-0.227841	4.55389	4.9616	5.42517	4.33096	4.69268	4.40214	4.96987	5.29506	5.35926
Polyadenylate-binding protein, cytoplasmic and nuclear	PAB1	PABP_YEAST Polyadenylate-binding protein, cytoplasmic and nuclear OS=Saccharomyces cerevisiae (strain ATCC 204508 / S288c) OX=559292 GN=PAB1 PE=1 SV=4	5.92794	7.4331	75.541	4	0	0	1	1	0	0	0.0934661	-0.226776	-5.95064	-5.47169	-5.64609	-1.95807	-2.14673	-2.09068	-3.75385	-6.28132	-6.35292
Ubiquitin-60S ribosomal protein L40;Ubiquitin;60S ribosomal protein L40;Ubiquitin-40S ribosomal protein S31;Ubiquitin;40S ribosomal protein S31;Polyubiquitin;Ubiquitin	RPL40B;RPL40A;RPS31;UBI4	RL40B_YEAST Ubiquitin-60S ribosomal protein L40 OS=Saccharomyces cerevisiae (strain ATCC 204508 / S288c) OX=559292 GN=RPL40B PE=1 SV=1;RL40A_YEAST Ubiquitin-60S ribosomal protein L40 OS=Saccharomyces cerevisiae (strain ATCC 204508 / S288c) OX=559292 GN=RPL	7.64847	8.42663	138.92	11	2	2	4	4	0	0	0.133233	0.829511	-1.95655	-1.75078	-0.865692	1.01991	0.216566	0.582632	-6.85997	-0.554691	0.353102
Pyruvate decarboxylase isozyme 1	PDC1	PDC1_YEAST Pyruvate decarboxylase isozyme 1 OS=Saccharomyces cerevisiae (strain ATCC 204508 / S288c) OX=559292 GN=PDC1 PE=1 SV=7	6.78896	8.23611	60.169	17	2	2	2	2	2	2	0.389217	0.196575	-0.763041	-0.289812	-0.0653667	-1.46717	-0.92041	-1.38952	-0.462872	-0.597057	-0.648014
ATP synthase subunit alpha, mitochondrial	ATP1	ATPA_YEAST ATP synthase subunit alpha, mitochondrial OS=Saccharomyces cerevisiae (strain ATCC 204508 / S288c) OX=559292 GN=ATP1 PE=1 SV=5	7.28274	8.75986	155.52	43	4	4	6	6	5	5	0.134512	-0.194239	0.435104	0.723236	1.7738	0.435947	1.27889	0.874218	1.18824	1.75769	0.568924
Protein URA2;Glutamine-dependent carbamoyl-phosphate synthase;Aspartate carbamoyltransferase	URA2	PYR1_YEAST Protein URA2 OS=Saccharomyces cerevisiae (strain ATCC 204508 / S288c) OX=559292 GN=URA2 PE=1 SV=5	5.45019	7.5401	10.778	4	1	1	1	1	1	1	0.96411	-0.54446	-3.42948	-3.12718	-2.73273	-3.31785	-3.51187	-3.30434	-2.22037	-2.79048	-2.64516
Tubulin alpha-3 chain;Tubulin alpha-1 chain	TUB3;TUB1	TBA3_YEAST Tubulin alpha-3 chain OS=Saccharomyces cerevisiae (strain ATCC 204508 / S288c) OX=559292 GN=TUB3 PE=1 SV=1;TBA1_YEAST Tubulin alpha-1 chain OS=Saccharomyces cerevisiae (strain ATCC 204508 / S288c) OX=559292 GN=TUB1 PE=1 SV=2	6.24908	7.55012	279.38	11	1	1	1	1	1	1	1.13924	-0.680764	-3.52985	-2.94821	-3.33105	-3.00246	-3.36985	-3.06197	-2.36096	-2.37046	-3.03541
Uncharacterized protein YGL041W-A, mitochondrial	YGL041W-A	YG41A_YEAST Uncharacterized protein YGL041W-A, mitochondrial OS=Saccharomyces cerevisiae (strain ATCC 204508 / S288c) OX=559292 GN=YGL041W-A PE=1 SV=2	5.88431	6.72942	5.9511	1	0	0	0	0	0	0	0.31574	-0.957769	-6.95965	-6.42751	-4.32263	-7.49664	-4.40577	-3.92745	-6.83446	-3.98412	-4.01789
Putative uncharacterized protein YLL053C		YLL53_YEAST Putative uncharacterized protein YLL053C OS=Saccharomyces cerevisiae (strain ATCC 204508 / S288c) OX=559292 GN=YLL053C PE=5 SV=1	10.6268	11.2288	6.3234	81	1	1	1	1	1	1	1.0781	-4.90635	6.92277	1.37111	7.59309	7.84813	7.11225	1.16202	11.0189	8.54239	11.0448
Heat shock protein SSC1, mitochondrial	SSC1	HSP77_YEAST Heat shock protein SSC1, mitochondrial OS=Saccharomyces cerevisiae (strain ATCC 204508 / S288c) OX=559292 GN=SSC1 PE=1 SV=1	6.34029	7.83165	23.015	9	0	0	4	4	1	1	0.655734	-2.47982	-6.43576	-5.93124	-1.3228	-1.53688	-2.0257	-1.05826	-3.12918	-1.39329	-1.72786
Heat shock protein SSA1;Heat shock protein SSA2	SSA1;SSA2	HSP71_YEAST Heat shock protein SSA1 OS=Saccharomyces cerevisiae (strain ATCC 204508 / S288c) OX=559292 GN=SSA1 PE=1 SV=4;HSP72_YEAST Heat shock protein SSA2 OS=Saccharomyces cerevisiae (strain ATCC 204508 / S288c) OX=559292 GN=SSA2 PE=1 SV=3	7.29594	8.84001	193.61	38	2	2	6	6	2	2	0.320145	-0.199392	0.447441	0.641937	1.07063	1.71237	2.0755	1.50181	1.25834	0.837904	0.66194
Phosphoenolpyruvate carboxykinase [ATP]	PCK1	PCKA_YEAST Phosphoenolpyruvate carboxykinase (ATP) OS=Saccharomyces cerevisiae (strain ATCC 204508 / S288c) OX=559292 GN=PCK1 PE=1 SV=2	7.24356	8.69071	112.92	28	7	7	2	2	1	1	2.78215	4.33452	1.92084	1.82932	2.412	-0.371836	-1.04604	-3.76493	-2.64989	-1.20748	-2.98402
Glucose-6-phosphate isomerase	PGI1	G6PI_YEAST Glucose-6-phosphate isomerase OS=Saccharomyces cerevisiae (strain ATCC 204508 / S288c) OX=559292 GN=PGI1 PE=1 SV=3	6.23241	7.63036	80.078	14	2	2	2	2	1	1	1.00604	0.56035	-2.70558	-2.60098	-1.98446	-3.31205	-2.54189	-2.90472	-2.73074	-3.16922	-3.07211
Fructose-bisphosphate aldolase	FBA1	ALF_YEAST Fructose-bisphosphate aldolase OS=Saccharomyces cerevisiae (strain ATCC 204508 / S288c) OX=559292 GN=FBA1 PE=1 SV=3	7.17176	8.37588	90.347	8	3	3	1	1	1	1	1.05278	0.672237	-0.186386	-0.0338821	0.28553	-0.29392	-0.442291	-0.390274	-0.305088	-0.473099	-1.17326
Glutamine--fructose-6-phosphate aminotransferase [isomerizing]	GFA1	GFA1_YEAST Glutamine--fructose-6-phosphate aminotransferase [isomerizing] OS=Saccharomyces cerevisiae (strain ATCC 204508 / S288c) OX=559292 GN=GFA1 PE=1 SV=4	6.26869	7.85976	27.426	3	2	2	1	1	1	1	1.01474	-0.517298	-1.76583	-2.32752	-1.60129	-2.29598	-2.84917	-2.82451	-1.19591	-1.50612	-1.44072
ATP-dependent molecular chaperone HSC82;ATP-dependent molecular chaperone HSP82	HSC82;HSP82	HSC82_YEAST ATP-dependent molecular chaperone HSC82 OS=Saccharomyces cerevisiae (strain ATCC 204508 / S288c) OX=559292 GN=HSC82 PE=1 SV=4;HSP82_YEAST ATP-dependent molecular chaperone HSP82 OS=Saccharomyces cerevisiae (strain ATCC 204508 / S288c) OX=559292	5.99997	7.56817	53.006	8	2	2	1	1	1	1	0.993919	3.18248	-2.44411	-2.74439	-1.90723	-3.41063	-4.08808	-2.42103	-2.58513	-6.9874	-7.07064
rRNA 2-O-methyltransferase fibrillarin	NOP1	FBRL_YEAST rRNA 2-O-methyltransferase fibrillarin OS=Saccharomyces cerevisiae (strain ATCC 204508 / S288c) OX=559292 GN=NOP1 PE=1 SV=1	5.86409	7.06822	5.9054	2	0	0	1	1	1	1	0.180256	0.615222	-4.244	-3.85501	-3.59962	-3.98817	-3.9802	-7.41472	-2.86493	-3.63378	-7.04557
V-type proton ATPase subunit B	VMA2	VATB_YEAST V-type proton ATPase subunit B OS=Saccharomyces cerevisiae (strain ATCC 204508 / S288c) OX=559292 GN=VMA2 PE=1 SV=2	6.57529	8.03771	34.192	7	3	3	0	0	1	1	0.69853	2.93371	-0.44058	-0.476635	-1.01748	-6.8947	-6.64337	-0.710306	-0.369144	-6.96274	-3.40395
Small COPII coat GTPase SAR1	SAR1	SAR1_YEAST Small COPII coat GTPase SAR1 OS=Saccharomyces cerevisiae (strain ATCC 204508 / S288c) OX=559292 GN=SAR1 PE=1 SV=1	7.2402	8.35413	28.718	14	1	1	1	1	2	2	0.501496	-2.58309	-7.10944	-0.520264	-0.211308	-0.218344	-0.151371	-0.210047	0	0.0889168	-0.180668
Malate dehydrogenase, cytoplasmic	MDH2	MDHC_YEAST Malate dehydrogenase, cytoplasmic OS=Saccharomyces cerevisiae (strain ATCC 204508 / S288c) OX=559292 GN=MDH2 PE=1 SV=2	5.71762	6.86375	9.3036	2	1	1	0	0	0	0	0.130517	-0.409558	-3.45377	-3.36754	-6.69196	-4.37637	-7.81593	-6.83215	-4.32512	-3.38013	-4.57934
Protein SPA2	SPA2	SPA2_YEAST Protein SPA2 OS=Saccharomyces cerevisiae (strain ATCC 204508 / S288c) OX=559292 GN=SPA2 PE=1 SV=1	8.26117	10.1855	323.31	180	11	11	16	16	13	13	0.684901	0.32063	5.29264	5.40722	5.93792	6.02531	6.27462	5.94381	5.37725	5.13607	5.16257
Karyogamy protein KAR4	KAR4	KAR4_YEAST Karyogamy protein KAR4 OS=Saccharomyces cerevisiae (strain ATCC 204508 / S288c) OX=559292 GN=KAR4 PE=1 SV=1	9.2447	10.5	323.31	135	4	4	23	23	0	0	1.17775	2.85583	-1.91879	-4.74909	-3.10935	8.0835	8.21187	7.93606	-6.79826	-4.53647	-7.00999
Transcription elongation factor SPT5	SPT5	SPT5_YEAST Transcription elongation factor SPT5 OS=Saccharomyces cerevisiae (strain ATCC 204508 / S288c) OX=559292 GN=SPT5 PE=1 SV=1	5.97216	7.66236	73.915	9	1	1	1	1	1	1	0.155028	0.762693	-3.15301	-2.81173	-1.78591	-3.94157	-3.66752	-2.30776	-1.73525	-6.92774	-1.37574
Protein BMH1;Protein BMH2	BMH1;BMH2	BMH1_YEAST Protein BMH1 OS=Saccharomyces cerevisiae (strain ATCC 204508 / S288c) OX=559292 GN=BMH1 PE=1 SV=4;BMH2_YEAST Protein BMH2 OS=Saccharomyces cerevisiae (strain ATCC 204508 / S288c) OX=559292 GN=BMH2 PE=1 SV=3	6.26012	7.43621	20.329	6	1	1	1	1	0	0	0.529583	1.9235	-7.08591	-1.90819	-2.80278	-3.47049	-3.3155	-3.45039	-5.72405	-5.88909	-5.95424
Cystathionine gamma-lyase	CYS3	CYS3_YEAST Cystathionine gamma-lyase OS=Saccharomyces cerevisiae (strain ATCC 204508 / S288c) OX=559292 GN=CYS3 PE=1 SV=2	6.35245	7.55658	14.239	6	1	1	1	1	0	0	3.9057	4.76939	-2.97573	-1.87235	-2.44833	-2.75593	-2.99501	-2.74078	-7.09272	-7.21245	-7.29939
Coatomer subunit gamma	SEC21	COPG_YEAST Coatomer subunit gamma OS=Saccharomyces cerevisiae (strain ATCC 204508 / S288c) OX=559292 GN=SEC21 PE=1 SV=2	7.1014	8.79161	323.31	52	10	10	6	6	4	4	3.17075	2.4023	1.68008	2.2136	2.35888	0.218344	0.414864	-0.0683956	-0.137859	-0.212771	-0.603712
Glycerol-3-phosphate dehydrogenase, mitochondrial	GUT2	GPDM_YEAST Glycerol-3-phosphate dehydrogenase, mitochondrial OS=Saccharomyces cerevisiae (strain ATCC 204508 / S288c) OX=559292 GN=GUT2 PE=1 SV=2	5.81536	7.41742	14.275	7	1	1	1	1	1	1	0.79746	-0.462385	-3.7554	-3.57582	-3.15339	-3.97753	-3.56659	-3.58769	-2.63296	-3.23976	-3.22473
Acetyl-CoA hydrolase	ACH1	ACH1_YEAST Acetyl-CoA hydrolase OS=Saccharomyces cerevisiae (strain ATCC 204508 / S288c) OX=559292 GN=ACH1 PE=1 SV=2	6.36186	7.7598	17.534	14	1	1	1	1	1	1	0.00909678	-0.00729052	-2.54286	-2.14592	-2.03231	-2.44951	-2.22542	-2.61542	-1.83024	-2.31152	-2.55747
Elongation factor 2	EFT1	EF2_YEAST Elongation factor 2 OS=Saccharomyces cerevisiae (strain ATCC 204508 / S288c) OX=559292 GN=EFT1 PE=1 SV=1	5.89026	7.55301	70.935	6	1	1	0	0	0	0	3.07549	2.32071	-2.61666	-1.93098	-1.8395	-7.66876	-2.38995	-2.67168	-4.29404	-4.50643	-4.5488
Protein DCG1	DCG1	DCG1_YEAST Protein DCG1 OS=Saccharomyces cerevisiae (strain ATCC 204508 / S288c) OX=559292 GN=DCG1 PE=2 SV=1	8.19042	9.30436	9.7031	12	1	1	1	1	1	1	0.651999	3.86934	0.422289	0.823027	6.01343	-7.64173	0.343872	0.754108	0.669289	-5.42738	0.408829
RNA polymerase II degradation factor 1	DEF1	DEF1_YEAST RNA polymerase II degradation factor 1 OS=Saccharomyces cerevisiae (strain ATCC 204508 / S288c) OX=559292 GN=DEF1 PE=1 SV=1	6.03326	7.23739	11.456	2	0	0	0	0	1	1	0.705628	-2.63479	-3.66773	-6.56941	-6.14893	-3.71424	-7.20713	-4.39488	-1.05571	-5.68754	-1.73845
Protein PET10	PET10	PET10_YEAST Protein PET10 OS=Saccharomyces cerevisiae (strain ATCC 204508 / S288c) OX=559292 GN=PET10 PE=1 SV=3	6.64839	7.92714	81.98	14	2	2	1	1	0	0	0.212324	-1.41036	-4.771	-6.54712	0.323303	-1.46552	-4.6601	-7.5813	-5.24653	-0.0563068	-1.4609
ATP synthase subunit gamma, mitochondrial	ATP3	ATPG_YEAST ATP synthase subunit gamma, mitochondrial OS=Saccharomyces cerevisiae (strain ATCC 204508 / S288c) OX=559292 GN=ATP3 PE=1 SV=1	6.6491	7.90437	259.46	19	1	1	1	1	1	1	1.49695	-0.99496	-2.5682	-2.09063	-1.57243	-2.48198	-1.87259	-2.36968	-0.864706	-1.17027	-1.2114
Protein MUM2	MUM2	MUM2_YEAST Protein MUM2 OS=Saccharomyces cerevisiae (strain ATCC 204508 / S288c) OX=559292 GN=MUM2 PE=1 SV=1	9.91564	11.0917	323.31	180	2	2	26	26	0	0	2.15026	2.63329	-2.63214	-1.82913	-3.4205	9.97596	10.1525	10.0831	-5.5156	-4.78112	-5.48493
40S ribosomal protein S20	RPS20	RS20_YEAST 40S ribosomal protein S20 OS=Saccharomyces cerevisiae (strain ATCC 204508 / S288c) OX=559292 GN=RPS20 PE=1 SV=3	6.79248	7.69557	323.31	14	0	0	1	1	1	1	0.129578	-0.634868	-7.05252	-2.33455	-1.91777	-2.33587	-1.74419	-2.23956	-4.57814	-2.28801	-2.53409
Putative proline--tRNA ligase YHR020W	YHR020W	YHI0_YEAST Putative proline--tRNA ligase YHR020W OS=Saccharomyces cerevisiae (strain ATCC 204508 / S288c) OX=559292 GN=YHR020W PE=1 SV=1	7.37794	8.98	11.064	2	1	1	1	1	0	0	0.35269	3.02082	2.41805	2.05703	-3.87709	2.31093	-7.99001	2.23136	-5.72736	3.01225	-5.74937
26S proteasome regulatory subunit RPN1	RPN1	RPN1_YEAST 26S proteasome regulatory subunit RPN1 OS=Saccharomyces cerevisiae (strain ATCC 204508 / S288c) OX=559292 GN=RPN1 PE=1 SV=3	5.89114	7.58134	7.2171	2	1	1	0	0	0	0	0.356001	-1.96181	-6.06154	-0.904734	-6.84723	-4.98189	-7.96266	-7.55513	-5.31068	-1.45476	-1.16264
Eukaryotic translation initiation factor 5B	FUN12	IF2P_YEAST Eukaryotic translation initiation factor 5B OS=Saccharomyces cerevisiae (strain ATCC 204508 / S288c) OX=559292 GN=FUN12 PE=1 SV=2	6.49543	8.0975	145.28	25	2	2	3	3	2	2	0.322135	-0.403639	-1.82648	-1.40955	-0.523464	-1.42729	-1.28269	-1.58841	-0.20748	-1.37299	-0.968113
13 kDa ribonucleoprotein-associated protein	SNU13	SNU13_YEAST 13 kDa ribonucleoprotein-associated protein OS=Saccharomyces cerevisiae (strain ATCC 204508 / S288c) OX=559292 GN=SNU13 PE=1 SV=1	6.99706	7.84217	184.88	12	1	1	1	1	1	1	1.63564	-1.32588	-3.30249	-3.1222	-2.18571	-1.48706	-1.93461	-2.28144	-1.28795	-1.72205	-1.62276
Protein PEA2	PEA2	PEA2_YEAST Protein PEA2 OS=Saccharomyces cerevisiae (strain ATCC 204508 / S288c) OX=559292 GN=PEA2 PE=1 SV=1	8.95156	10.3495	323.31	200	16	16	23	23	14	14	0.419107	0.261962	5.76856	5.97687	6.64956	6.43475	6.71986	6.64988	5.87969	5.89082	5.83859
Heat shock protein SSB2	SSB2	SSB2_YEAST Ribosome-associated molecular chaperone SSB2 OS=Saccharomyces cerevisiae (strain ATCC 204508 / S288c) OX=559292 GN=SSB2 PE=1 SV=2	7.51812	8.99524	180.02	39	0	4	0	7	0	4	0.0350977	0.0323118	0.924229	1.24978	1.41246	2.61694	2.1732	2.32205	1.68735	0.749006	1.05318
Sporulation-specific with a leucine zipper motif protein 1	SLZ1	SLZ1_YEAST Sporulation-specific with a leucine zipper motif protein 1 OS=Saccharomyces cerevisiae (strain ATCC 204508 / S288c) OX=559292 GN=SLZ1 PE=1 SV=1	7.74981	8.79121	133.12	23	1	1	7	7	0	0	0.350696	1.82181	0.408874	0.637871	0.648573	2.32122	1.31939	1.19954	-5.56457	1.0605	0.733954
Coatomer subunit epsilon	SEC28	COPE_YEAST Coatomer subunit epsilon OS=Saccharomyces cerevisiae (strain ATCC 204508 / S288c) OX=559292 GN=SEC28 PE=1 SV=2	7.19918	8.34531	303.31	23	4	4	3	3	0	0	1.72004	5.67213	0.218845	1.03685	1.07388	-1.40375	-1.4427	-1.60792	-6.78361	-5.89229	-2.01091
Coatomer subunit beta	SEC26	COPB_YEAST Coatomer subunit beta OS=Saccharomyces cerevisiae (strain ATCC 204508 / S288c) OX=559292 GN=SEC26 PE=1 SV=2	7.21588	8.88798	323.31	28	9	9	1	1	0	0	1.80407	6.32949	1.78567	2.56357	3.58475	-1.02136	0.151369	0.0683956	-5.479	-0.747463	-4.82802
Coatomer subunit beta	SEC27	COPB2_YEAST Coatomer subunit beta OS=Saccharomyces cerevisiae (strain ATCC 204508 / S288c) OX=559292 GN=SEC27 PE=1 SV=1	6.64395	8.29715	54.693	12	2	2	1	1	0	0	4.23716	6.40852	0.22982	0.654308	1.35212	-1.4856	-3.99042	-1.51697	-5.54243	-5.4894	-5.95749
N6-adenosine-methyltransferase IME4	IME4	IME4_YEAST N6-adenosine-methyltransferase IME4 OS=Saccharomyces cerevisiae (strain ATCC 204508 / S288c) OX=559292 GN=IME4 PE=1 SV=1	8.95073	10.4279	323.31	103	1	1	21	21	0	0	2.66468	2.26957	-4.06284	-3.30912	-3.36207	8.27124	3.80579	8.40739	-6.25988	-5.73489	-5.54797
Isocitrate dehydrogenase [NADP] cytoplasmic	IDP2	IDHC_YEAST Isocitrate dehydrogenase [NADP] cytoplasmic OS=Saccharomyces cerevisiae (strain ATCC 204508 / S288c) OX=559292 GN=IDP2 PE=1 SV=2	6.76918	8.21632	63.184	15	2	2	2	2	2	2	1.16114	0.576825	-0.646147	0.0338802	-0.27169	-1.51887	-1.11896	-1.5853	-0.741308	-0.749487	-1.12364
Coatomer subunit delta	RET2	COPD_YEAST Coatomer subunit delta OS=Saccharomyces cerevisiae (strain ATCC 204508 / S288c) OX=559292 GN=RET2 PE=1 SV=3	6.94658	8.22534	92.015	6	2	2	1	1	0	0	1.45941	4.463	0.0910969	0.355858	1.19165	-2.2144	-5.27252	-3.75406	-4.72667	-1.22623	-5.7975
Potassium-activated aldehyde dehydrogenase, mitochondrial	ALD4	ALDH4_YEAST Potassium-activated aldehyde dehydrogenase, mitochondrial OS=Saccharomyces cerevisiae (strain ATCC 204508 / S288c) OX=559292 GN=ALD4 PE=1 SV=2	6.59551	8.07262	28.276	18	1	1	2	2	1	1	0.325757	-0.147441	-1.61196	-1.73995	-1.21896	-1.51149	-0.682842	-1.03034	-1.38354	-1.54582	-1.19919
Glutamate--tRNA ligase, cytoplasmic	GUS1	SYEC_YEAST Glutamate--tRNA ligase, cytoplasmic OS=Saccharomyces cerevisiae (strain ATCC 204508 / S288c) OX=559292 GN=GUS1 PE=1 SV=3	7.97109	9.6243	323.31	91	22	22	6	6	4	4	3.19784	3.50789	4.35731	4.87431	5.60161	2.80054	3.16692	2.85866	1.47975	1.38696	1.44286
tRNA-aminoacylation cofactor ARC1	ARC1	ARC1_YEAST tRNA-aminoacylation cofactor ARC1 OS=Saccharomyces cerevisiae (strain ATCC 204508 / S288c) OX=559292 GN=ARC1 PE=1 SV=2	8.1602	9.54042	323.31	41	6	6	4	4	2	2	3.2676	3.37826	4.14369	4.27863	4.84096	2.19391	2.38598	2.10637	1.55476	0.832401	0.741333
Biotin--protein ligase;Biotin--[methylmalonyl-CoA-carboxytransferase] ligase;Biotin--[propionyl-CoA-carboxylase [ATP-hydrolyzing]] ligase;Biotin--[methylcrotonoyl-CoA-carboxylase] ligase;Biotin--[acetyl-CoA-carboxylase] ligase	BPL1	BPL1_YEAST Biotin--protein ligase OS=Saccharomyces cerevisiae (strain ATCC 204508 / S288c) OX=559292 GN=BPL1 PE=1 SV=1	11.49	12.9952	323.31	3254	52	52	52	52	49	49	1.05706	-0.481901	13.911	14.2088	14.6196	14.155	14.3631	14.1977	14.8486	14.6847	14.6518
DNA replication licensing factor MCM6	MCM6	MCM6_YEAST DNA replication licensing factor MCM6 OS=Saccharomyces cerevisiae (strain ATCC 204508 / S288c) OX=559292 GN=MCM6 PE=1 SV=2	5.40799	7.14836	14.621	7	1	1	2	2	1	1	0.235418	1.18311	-2.61837	-3.39028	-6.82284	-7.60335	-7.92385	-4.98092	-2.47166	-6.91357	-6.99559
NADPH-dependent aldehyde reductase ARI1	ARI1	ARI1_YEAST NADPH-dependent aldehyde reductase ARI1 OS=Saccharomyces cerevisiae (strain ATCC 204508 / S288c) OX=559292 GN=ARI1 PE=1 SV=1	9.39115	10.6922	6.3081	9	1	1	1	1	1	1	0.95883	-0.464797	7.09905	7.37032	7.82824	6.887	7.15046	6.92918	8.05518	7.82122	7.81559
Uncharacterized protein YGL036W	YGL036W	YG036_YEAST Uncharacterized protein YGL036W OS=Saccharomyces cerevisiae (strain ATCC 204508 / S288c) OX=559292 GN=YGL036W PE=1 SV=1	9.33262	10.9237	323.31	193	1	1	38	38	0	0	2.60942	3.4409	-1.81663	-1.27755	-1.95351	9.39458	9.43332	9.59756	-4.2105	-5.4465	-5.7134
Coatomer subunit zeta	RET3	COPZ_YEAST Coatomer subunit zeta OS=Saccharomyces cerevisiae (strain ATCC 204508 / S288c) OX=559292 GN=RET3 PE=1 SV=1	6.98826	7.89135	223.37	13	3	3	0	0	0	0	4.79205	5.22372	-0.672487	-0.396515	-0.0633545	-6.46472	-6.77225	-7.51799	-5.37561	-5.65215	-5.77574
Coatomer subunit alpha	COP1	COPA_YEAST Coatomer subunit alpha OS=Saccharomyces cerevisiae (strain ATCC 204508 / S288c) OX=559292 GN=COP1 PE=1 SV=2	6.26038	8.03854	32.507	14	1	1	2	2	1	1	1.65865	1.7561	-0.848431	-0.509293	0	-2.80582	-2.07362	-2.72904	-1.39857	-2.46103	-2.76643
Actin-related protein 5	ARP5	ARP5_YEAST Actin-related protein 5 OS=Saccharomyces cerevisiae (strain ATCC 204508 / S288c) OX=559292 GN=ARP5 PE=1 SV=1	7.91972	9.42487	6.3369	4	1	1	1	1	1	1	0.366485	2.80825	3.24871	3.36353	3.84331	3.45692	-8.23953	3.33264	4.07082	-5.71348	3.67347
Actin	ACT1	ACT_YEAST Actin OS=Saccharomyces cerevisiae (strain ATCC 204508 / S288c) OX=559292 GN=ACT1 PE=1 SV=1	7.45512	8.75615	63.057	34	4	4	3	3	3	3	0.927807	-0.513236	0.682728	0.86722	1.53268	0.562283	0.694393	0.441694	1.51301	1.54843	1.56089
Succinate dehydrogenase [ubiquinone] flavoprotein subunit, mitochondrial	SDH1	SDHA_YEAST Succinate dehydrogenase [ubiquinone] flavoprotein subunit, mitochondrial OS=Saccharomyces cerevisiae (strain ATCC 204508 / S288c) OX=559292 GN=SDH1 PE=1 SV=1	5.85687	7.36203	10.969	3	1	1	1	1	0	0	1.16035	3.08354	-2.85397	-1.881	-1.74713	-7.91547	-5.23921	-6.41601	-2.84469	-6.40718	-6.48086
Acetyl-CoA carboxylase;Biotin carboxylase	ACC1	ACAC_YEAST Acetyl-CoA carboxylase OS=Saccharomyces cerevisiae (strain ATCC 204508 / S288c) OX=559292 GN=ACC1 PE=1 SV=2	7.49542	9.59923	323.31	133	35	35	12	12	7	7	3.45629	4.16506	4.89769	4.91006	4.87484	2.69307	2.76565	2.20083	1.18659	1.00081	0
Nucleolar protein 3	NPL3	NOP3_YEAST Nucleolar protein 3 OS=Saccharomyces cerevisiae (strain ATCC 204508 / S288c) OX=559292 GN=NPL3 PE=1 SV=1	6.87163	8.23335	168.76	4	0	0	1	1	0	0	0.277252	1.18745	-7.32416	-4.35423	-3.27977	0.609064	0.878262	0.16884	-8.62178	-4.92473	-4.97399
Acetyl-coenzyme A synthetase 1	ACS1	ACS1_YEAST Acetyl-coenzyme A synthetase 1 OS=Saccharomyces cerevisiae (strain ATCC 204508 / S288c) OX=559292 GN=ACS1 PE=1 SV=2	8.28005	9.82411	323.31	161	14	15	16	17	18	19	0.682985	-0.319259	4.17659	4.50016	4.76373	4.39801	4.44788	4.47984	5.05371	4.69572	4.64881
Dynein light chain 1, cytoplasmic	DYN2	DYL1_YEAST Dynein light chain 1, cytoplasmic OS=Saccharomyces cerevisiae (strain ATCC 204508 / S288c) OX=559292 GN=DYN2 PE=1 SV=1	7.02173	7.79986	11.222	4	0	0	2	2	0	0	0.0502738	0.168515	-4.74233	-6.51548	-4.42335	-0.919506	-0.791616	-0.882381	-7.29435	-4.42565	-4.4667
Diphosphoinositol polyphosphate phosphohydrolase DDP1	DDP1	DDP1_YEAST Diphosphoinositol polyphosphate phosphohydrolase DDP1 OS=Saccharomyces cerevisiae (strain ATCC 204508 / S288c) OX=559292 GN=DDP1 PE=1 SV=3	5.37952	6.42091	6.5838	1	1	1	0	0	0	0	0.66303	-0.779213	-5.64267	-5.57674	-6.78822	-4.94895	-6.26089	-4.8129	-4.50602	-5.55219	-5.61179
Nuclear polyadenylated RNA-binding protein 4	HRP1	HRP1_YEAST Nuclear polyadenylated RNA-binding protein 4 OS=Saccharomyces cerevisiae (strain ATCC 204508 / S288c) OX=559292 GN=HRP1 PE=1 SV=1	8.04127	9.32004	323.31	36	3	3	3	3	3	3	1.36915	-0.867379	2.12947	2.36423	3.10426	2.81693	2.97379	2.48053	3.46663	3.34546	3.38801

## Sheet: No RNase
Symbol color	Symbol type	Symbol size	Protein IDs	Majority protein IDs	Protein names	Gene names	Fasta headers	Peptide sequences	Razor + unique peptides Mum_minusR_1	Razor + unique peptides Mum_plusR_1	Razor + unique peptides Slz1_1	Razor + unique peptides WT_minusR_1	Razor + unique peptides WT_plusR_1	Unique peptides Mum_minusR_1	Unique peptides Mum_plusR_1	Unique peptides Slz1_1	Unique peptides WT_minusR_1	Unique peptides WT_plusR_1	Sequence coverage Mum_minusR_1 [%]	Sequence coverage Mum_plusR_1 [%]	Sequence coverage Slz1_1 [%]	Sequence coverage WT_minusR_1 [%]	Sequence coverage WT_plusR_1 [%]	MS/MS count Mum_minusR_1	MS/MS count Mum_plusR_1	MS/MS count Slz1_1	MS/MS count WT_minusR_1	MS/MS count WT_plusR_1	t-test Significant LFQ log2 [mum-R/WT-R] S0=1	iBAQ	Intensity	Q-value	Score	MS/MS count	Mol. weight [kDa]	-Log t-test p value LFQ log2 [mum-R/WT-R] S0=1	t-test Difference LFQ log2 [mum-R/WT-R] S0=1	LFQ intensity Mum_minusR_1	LFQ intensity Mum_minusR_2	LFQ intensity Mum_minusR_3	LFQ intensity Mum_plusR_1	LFQ intensity Mum_plusR_2	LFQ intensity Mum_plusR_3	LFQ intensity WT_minusR_1	LFQ intensity WT_minusR_2	LFQ intensity WT_minusR_3	LFQ intensity WT_plusR_1	LFQ intensity WT_plusR_2	LFQ intensity WT_plusR_3
Color [DarkGray]	1	4	P25583	P25583	Karyogamy protein KAR4	KAR4	KAR4_YEAST Karyogamy protein KAR4 OS=Saccharomyces cerevisiae (strain ATCC 204508 / S288c) OX=559292 GN=KAR4 PE=1 SV=1	AFQDPTYDQNK;AFQDPTYDQNKSR;AKQINQFATTPFGCK;DFHTNDYSNNYIHGK;DTTNGAVPSHLYR;EEIANLGSNIPLK;HINNSHLQGPNQETIEMK;HVSFKPSR;IAENFSTATR;IAENFSTATRR;KSPFYPGLDQDDETLMEK;LISKPGFLFIWANSQK;LISKPGFLFIWANSQKINELTK;LLNNEIWAK;LLNNEIWAKK;MQWHCWMCITGTVR;NEIELLRPR;PGFLFIWANSQK;QINQFATTPFGCK;RLHIIPAR;RSEELVFVPIDK;RSEELVFVPIDKK;RSTDGHLIHCNVDTDLSIETK;SEELVFVPIDK;SEELVFVPIDKK;SKHVSFKPSR;SLPQQHVTNIENR;SLPQQHVTNIENRVDGYPK;SP…	33	35	36	0	3	33	35	36	0	3	76.4	79.1	80.9	0	12.2	76	119	132	0	0	+	9.27869	10.813	0	323.31	1031	38.672	4.64624	13.0155	28.5007	28.5564	28.5863	29.297	29.2186	29.357	16.5442	15.4979	14.5547	15.0855	14.1914	14.5497
Color [DarkGray]	1	4	P41833	P41833	N6-adenosine-methyltransferase IME4	IME4	IME4_YEAST N6-adenosine-methyltransferase IME4 OS=Saccharomyces cerevisiae (strain ATCC 204508 / S288c) OX=559292 GN=IME4 PE=1 SV=1	ADRETASENKR;AIELGKESLNNWGYNVINEVSWIK;AKYTTEVIEYIPICSDYSHASLLSTSVYIVNNK;ALPAQWIR;APLSGQLKDVYSLYISGGYDDEMQK;APLSGQLKDVYSLYISGGYDDEMQKLR;DHNTRPGWFTIGNQLTGNCIYEMDVER;DHNTRPGWFTIGNQLTGNCIYEMDVERK;DVYSLYISGGYDDEMQK;DVYSLYISGGYDDEMQKLR;EHLLVGLK;EHLLVGLKGNPK;EKPSSFQLAK;EKPSSFQLAKER;ESLNNWGYNVINEVSWIK;ESLNNWGYNVINEVSWIKTNQLGR;ETSRKPDELYGIAER;FHAFYYTLK;HIDVDLIVSMTR;HTPFESK;IHFIPNIK;IHFIPNIKPQTDISLGDCSYLDTC…	33	39	40	0	2	33	39	40	0	2	57.2	58.7	59.8	0	3.5	67	113	152	0	0	+	9.06461	10.8137	0	323.31	1041	69.395	5.05578	11.7837	27.5727	28.4437	28.4762	29.3529	29.4703	29.3248	16.9341	16.2212	15.9861	12.9062	13.2087	14.9492
Color [DarkGray]	1	4	P38236	P38236	Protein MUM2	MUM2	MUM2_YEAST Protein MUM2 OS=Saccharomyces cerevisiae (strain ATCC 204508 / S288c) OX=559292 GN=MUM2 PE=1 SV=1	DDRMEALEVELQIK;DDRMEALEVELQIKESQIESLENEIQR;DTNGNPNDSMSSMSNMTAK;EKELAETK;EKELAETKENLESILTALALNPTNSVTK;EKIASLEAHLASK;EKIASLEAHLASKESSK;ELAETKENLESILTALALNPTNSVTK;ENCHIPQTFELPASLEVIFR;ENCHIPQTFELPASLEVIFRK;ENLESILTALALNPTNSVTK;ENLESILTALALNPTNSVTKYGR;ESQIESLENEIQR;ETQIELQLAK;ETQIELQLAKK;ETQIELQLAKKENLELR;IASLEAHLASK;IASLEAHLASKESSK;IFNEGLNYK;IFNEGLNYKQNEHK;IFNEGLNYKQNEHKYEK;KENLELREK;KIFNEGLNYK;KIFN…	46	46	47	3	9	46	46	47	3	9	72.7	72.7	72.7	7.7	19.7	120	191	245	3	5	+	9.99168	11.3963	0	323.31	1757	41.433	5.52022	11.1678	30.6288	30.6595	30.6299	31.331	31.2892	31.3987	18.9002	19.6133	19.9015	20.005	20.3534	20.5288
Color [DarkGray]	1	4	P53185	P53185	Uncharacterized protein YGL036W	YGL036W	YG036_YEAST Uncharacterized protein YGL036W OS=Saccharomyces cerevisiae (strain ATCC 204508 / S288c) OX=559292 GN=YGL036W PE=1 SV=1	AQSIHIDDFENENN;CAGHAPLVTAASR;CLNLTILLISK;DEGHKEKEENINLIGSSSVK;DFESELR;DGSDDDNLIK;DGSDDDNLIKK;DYITLWNDGSEVYNAFYK;DYITLWNDGSEVYNAFYKELFYEEQPK;DYQVDFFIITSLASTSSLEVLPSHYFVYK;EENINLIGSSSVK;EENINLIGSSSVKK;EKEENINLIGSSSVK;EKEENINLIGSSSVKK;EKNLALYHLIK;ELDVFSPLLQSAVTAANNSNIIWDLIAVLFAYISIHK;ELFYEEQPK;IDWTQSYQTR;IKPIKLTTSDLLK;ISHFPNLIDPK;ISINLLNHLFFHQIR;ISINLLNHLFFHQIRDGSDDDNLIK;ISINLLNHLFFHQIRDGSDDDNLIKK;I…	50	57	55	2	4	50	57	55	2	4	57.1	59	59	2.6	5.3	109	175	214	1	1	+	9.41228	11.1678	0	323.31	1493	102.37	5.18599	11.1395	29.3247	29.4323	29.4537	30.1487	30.3188	30.2142	17.5498	18.6641	18.5784	18.5772	18.1329	17.9294
Color [DarkGray]	1	4	P40167	P40167	Sporulation-specific with a leucine zipper motif protein 1	SLZ1	SLZ1_YEAST Sporulation-specific with a leucine zipper motif protein 1 OS=Saccharomyces cerevisiae (strain ATCC 204508 / S288c) OX=559292 GN=SLZ1 PE=1 SV=1	AFGEERK;DSQFVLQDMEFTSWER;DSQFVLQDMEFTSWERR;EVEKENYK;EVEKENYKR;IMIDQAIQTSSPLNVQLTELFNDNVLDVSK;KLLQQEMEYSNK;KLLQQEMEYSNKVK;LCMDEKPVPDAGITMQQASR;LLQQEMEYSNK;LLQQEMEYSNKVK;MMNKVDQIIGYK;MMNKVDQIIGYKK;MNKVDQIIGYK;MNKVDQIIGYKK;NVTIGLER;PKPQTGLDFDIDHQTVSK;PQTGLDFDIDHQTVSK;RWSNCSTTSNATTVSSVPDPK;VDQIIGYK;VDQIIGYKK;VKNVTIGLER;WSEFPTCCDQAAI;WSNCSTTSNATTVSSVPDPK;YEVKLPK	22	23	1	2	1	22	23	1	2	1	54.4	56.7	3.7	13.8	3.7	59	104	0	0	0	+	8.97977	10.286	0	323.31	513	34.317	6.94244	9.89629	28.0382	28.0826	28.1407	29.1419	29.0772	29.0463	18.0052	18.1739	18.3935	17.9273	18.3187	18.1625
Color [DarkGray]	1	4	P10080	P10080	Single-stranded nucleic acid-binding protein	SBP1	SSBP1_YEAST Single-stranded nucleic acid-binding protein OS=Saccharomyces cerevisiae (strain ATCC 204508 / S288c) OX=559292 GN=SBP1 PE=1 SV=2	ATKEEVAEFFGTDADSISLPMR;ATKEEVAEFFGTDADSISLPMRK;EEVAEFFGTDADSISLPMR;EEVAEFFGTDADSISLPMRK;ELTVDVAVIRPENDEEEIEQETGSEEKQE;FPTKIDFDNIKENYDTK;GMAFVTFSGENVDIEAK;GMAFVTFSGENVDIEAKAEEFKGK;IDFDNIKENYDTK;IFTSDSANR;QLFVEEFGDEVSVEIPIKEHTDGHIPASK;SKDTLYINNVPFK;TVIDPEDTIFIGNVAHECTEDDLK	11	3	1	1	1	11	3	1	1	1	57.1	13.3	9.9	4.4	9.9	16	1	2	0	0	+	7.02135	8.67741	0	49.395	60	32.989	3.15543	9.38115	24.7576	25.2061	24.8526	16.9424	16.6443	17.3114	13.5912	16.5411	16.5406	17.1773	17.1217	17.9009
Color [DarkGray]	1	4	Q02647	Q02647	Dynein light chain 1, cytoplasmic	DYN2	DYL1_YEAST Dynein light chain 1, cytoplasmic OS=Saccharomyces cerevisiae (strain ATCC 204508 / S288c) OX=559292 GN=DYN2 PE=1 SV=1	ASDITDKLK;ASDITDKLKEDILTISK;DALDKYQLER;DALDKYQLERDIAGTVK;DIAGTVK;EDILTISKDALDKYQLER;LKEDILTISK;NFGSYVTHEK;SDENKSTPIVK;YGNTWHVIVGK	7	10	0	0	0	7	10	0	0	0	71.7	71.7	0	0	0	7	12	0	0	0	+	8.43361	9.42415	0	23.454	59	10.441	4.47358	8.72869	25.487	25.4552	25.5805	27.2478	27.2066	27.4204	17.6265	16.3082	16.4019	16.5762	16.4927	16.4769
Color [DarkGray]	1	4	P39935	P39935	Eukaryotic initiation factor 4F subunit p150	TIF4631	IF4F1_YEAST Eukaryotic initiation factor 4F subunit p150 OS=Saccharomyces cerevisiae (strain ATCC 204508 / S288c) OX=559292 GN=TIF4631 PE=1 SV=2	ASSEENISEAEK;AVIEQIFLK;DATPIEDVFSFNYPEGIEGPDIK;ELNPDITDETNEGK;ELNPDITDETNEGKTGPK;LKETSDSTSTSTPTPTPSTNDSK;SDEAEAEVEAEAGDAGTK;SGEHLDLKEQHK;SPVPTKIEITTK;STVSPQPESK;TTPENVEEKGSDKPEVTEK	11	0	1	0	0	11	0	1	0	0	16.4	0	2.4	0	0	11	0	1	0	0	+	5.90771	7.98829	0	47.009	33	107.1	3.32843	7.48814	24.0152	23.5677	23.5752	16.9702	16.056	16.0164	17.0117	14.8358	16.8462	16.9399	15.2371	17.668
Color [DarkGray]	1	4	P32385	P32385	Ribonucleoprotein 1	RNP1	RNP1_YEAST Ribonucleoprotein 1 OS=Saccharomyces cerevisiae (strain ATCC 204508 / S288c) OX=559292 GN=RNP1 PE=4 SV=2	DLFEPNYGK;FDNLGTGDSIQKK;IVIENILTK;IVIENILTKEEK;KTTTVVPENTK;QDLRDLFEPNYGK;TAPDLKPLSTNTLYVK;TTTVVPENTK;VFFSDEFHTGEAFIK	7	2	0	0	0	7	2	0	0	0	26.9	8.8	0	0	0	7	0	0	0	0	+	6.62335	8.01406	0	14.51	22	28.861	6.33248	7.44079	22.9656	23.1804	23.3753	18.3478	17.6624	18.1276	15.8085	15.6993	15.6911	16.7145	16.6323	16.2436
Color [DarkGray]	1	4	P04147	P04147	Polyadenylate-binding protein, cytoplasmic and nuclear	PAB1	PABP_YEAST Polyadenylate-binding protein, cytoplasmic and nuclear OS=Saccharomyces cerevisiae (strain ATCC 204508 / S288c) OX=559292 GN=PAB1 PE=1 SV=4	ADITDKTAEQLENLNIQDDQK;AHYTNLYVK;AIEQLNYTPIK;AIEQLNYTPIKGR;ALYDTFSVFGDILSSK;AVEALNDSELNGEK;AVEALNDSELNGEKLYVGR;DSQLEETK;DSQLEETKAHYTNLYVK;EAIDALNGMLLNGQEIYVAPHLSR;EASAAYESFK;EASAAYESFKK;EASAAYESFKKEQEQQTEQA;ERDSQLEETK;ERDSQLEETKAHYTNLYVK;FGPIVSASLEK;FGPIVSASLEKDADGK;FGPIVSASLEKDADGKLK;GFGFVCFSTPEEATK;GFGFVHFEEEGAAK;GFGFVNYEK;GFGFVNYEKHEDAVK;GSGNIFIK;GVPFNGPNPQQMNPMGGMPK;ITGMILDLPPQEVFPLLESDELFEQHY…	46	11	32	4	16	46	11	32	4	16	70.7	27.2	55.1	10.9	35.2	60	9	34	1	11	+	7.7924	9.559	0	323.31	373	64.343	5.31191	7.35	26.7305	27.0591	27.2118	20.6279	20.8236	20.8984	19.3117	19.8158	19.8238	21.3696	21.3546	21.3514
Color [DarkGray]	1	4	P05737;Q12213	P05737;Q12213	60S ribosomal protein L7-A;60S ribosomal protein L7-B	RPL7A;RPL7B	RL7A_YEAST 60S ribosomal protein L7-A OS=Saccharomyces cerevisiae (strain ATCC 204508 / S288c) OX=559292 GN=RPL7A PE=1 SV=3;RL7B_YEAST 60S ribosomal protein L7-B OS=Saccharomyces cerevisiae (strain ATCC 204508 / S288c) OX=559292 GN=RPL7B PE=1 SV=3	AAGSYYVEAQHK;ATLELLK;HFIQGGSFGNREEFINK;ILTPESQLKK;LIEPYVAYGYPSYSTIR;LSNPSGGWGVPR;NAAYQKEYETAER;QANNFLWPFK;QRVPLSDNAIIEANLGK;TAEQVAAER;VPLSDNAIIEANLGK;YGILSIDDLIHEIITVGPHFK	11	12	0	0	2	11	12	0	0	2	50.8	59.4	0	0	13.9	10	10	0	0	0	+	7.24849	8.48021	0	44.53	65	27.638	4.93883	7.21628	23.3023	23.3905	23.4143	23.4974	23.3348	23.4179	15.6414	16.5419	16.275	18.3717	15.9386	17.8873
Color [DarkGray]	1	4	P38199	P38199	Heterogeneous nuclear rnp K-like protein 2	HEK2	HEK2_YEAST Heterogeneous nuclear rnp K-like protein 2 OS=Saccharomyces cerevisiae (strain ATCC 204508 / S288c) OX=559292 GN=HEK2 PE=1 SV=1	DLQQLEDIGYVR;KLEAAEGDATVVTER;LIVANSHISSIIGK;NLNTEIEKR;SDSASFLEEKEEPQENHDNKEEQS;SSGEPTSPSTSSNTR	5	0	0	0	0	5	0	0	0	0	17.1	0	0	0	0	6	0	0	0	0	+	6.54411	8.02395	0	24.025	21	41.682	4.21667	7.19746	23.5947	23.5908	23.6561	15.5069	16.1793	16.7325	15.6176	16.9566	16.675	15.7429	15.6517	17.2005
Color [DarkGray]	1	4	P0CX48;P0CX47	P0CX48;P0CX47	40S ribosomal protein S11-B;40S ribosomal protein S11-A	RPS11B;RPS11A	RS11B_YEAST 40S ribosomal protein S11-B OS=Saccharomyces cerevisiae (strain ATCC 204508 / S288c) OX=559292 GN=RPS11B PE=1 SV=1;RS11A_YEAST 40S ribosomal protein S11-A OS=Saccharomyces cerevisiae (strain ATCC 204508 / S288c) OX=559292 GN=RPS11A PE=1 SV=1	AFQKQPHIFNNPK;AYLHYIPK;CPFTGLVSIR;ILTGTVVSTK;NVPVHVSPAFR;STELTVQSER;TAIEGSYIDKK;VQVGDIVTVGQCRPISK	8	6	0	0	5	8	6	0	0	5	57.7	42.9	0	0	32.1	8	6	0	0	0	+	7.16844	8.29427	0	8.8171	39	17.749	3.88417	7.03094	23.3395	23.4032	23.32	22.734	22.8411	22.0419	15.9738	15.7175	17.2785	19.4723	19.4189	19.5955
Color [DarkGray]	1	4	P39936	P39936	Eukaryotic initiation factor 4F subunit p130	TIF4632	IF4F2_YEAST Eukaryotic initiation factor 4F subunit p130 OS=Saccharomyces cerevisiae (strain ATCC 204508 / S288c) OX=559292 GN=TIF4632 PE=1 SV=1	AAEKAEEQAPKEEIAPLVPSANR;AQPISDIYEFAYPENVERPDIK;KVEEVSQAPR;SVTFNEPENESSSQDVDELVKDDDTTEISDTTGGK;TTKIEITTK	3	0	0	0	0	3	0	0	0	0	7.3	0	0	0	0	5	0	0	0	0	+	5.42988	7.58578	0	21.421	12	103.9	4.87732	7.02043	23.2376	22.796	23.0483	16.229	16.1463	16.6724	16.4694	15.6689	15.8823	15.8953	16.8598	15.5662
Color [DarkGray]	1	4	P05755	P05755	40S ribosomal protein S9-B	RPS9B	RS9B_YEAST 40S ribosomal protein S9-B OS=Saccharomyces cerevisiae (strain ATCC 204508 / S288c) OX=559292 GN=RPS9B PE=1 SV=4	HIDFAPTSPFGGARPGR;ISFQLSK;KAEASGEAAEEAEDEE;LDSEKHIDFAPTSPFGGARPGR;LFEGNALIR;QIVNIPSFMVR;VGVLSEDKK	6	5	0	0	0	1	1	0	0	0	34.4	26.7	0	0	0	4	4	0	0	0	+	7.08952	8.16385	0	85.127	24	22.298	3.39521	6.86308	23.8615	24.0109	23.963	22.2868	22.219	22.4048	16.0715	16.9408	18.2339	15.6352	20.1051	16.7697
Color [DarkGray]	1	4	P10664;P49626	P10664;P49626	60S ribosomal protein L4-A;60S ribosomal protein L4-B	RPL4A;RPL4B	RL4A_YEAST 60S ribosomal protein L4-A OS=Saccharomyces cerevisiae (strain ATCC 204508 / S288c) OX=559292 GN=RPL4A PE=1 SV=4;RL4B_YEAST 60S ribosomal protein L4-B OS=Saccharomyces cerevisiae (strain ATCC 204508 / S288c) OX=559292 GN=RPL4B PE=1 SV=2	AGHQTSAESWGTGR;AVGAHSDLLK;IINSSEIQSAIRPAGQATQK;IPEIPLVVSTDLESIQK;LDQVWGSETVASSK;NVPGVETANVASLNLLQLAPGAHLGR;RGPLVVYAEDNGIVK;SRPQVTVHSLTGEATANALPLPAVFSAPIRPDIVHTVFTSVNK;TGTKPAAVFTETLKHD;TKEAVAALK;VEKIPEIPLVVSTDLESIQK;VGYTLPSHIISTSDVTR	7	9	2	0	2	7	9	2	0	2	32	39.2	11.9	0	11.9	7	13	0	0	3	+	7.03495	8.76024	0	157.03	71	39.092	5.48872	6.76483	23.1861	23.5796	23.3506	24.3873	24.7099	24.5418	16.3194	16.7504	16.7519	18.7233	17.6176	18.6469
Color [DarkGray]	1	4	P50094	P50094	Inosine-5-monophosphate dehydrogenase 4	IMD4	IMDH4_YEAST Inosine-5-monophosphate dehydrogenase 4 OS=Saccharomyces cerevisiae (strain ATCC 204508 / S288c) OX=559292 GN=IMD4 PE=1 SV=1	DGLSVQELMDSTTR;DIQFLEDDSLVVSEVMTK;EQAANLIAAGADGLR;ETFPDLEIIAGNVATR;FGFSGFPVTEDGK;GGLTYNDFLVLPGLVNFPSSAVSLQTK;GITLKEGNEILK;GMGSIDAMQK;LLIVDDNGNLVSMLSR;LVGLVTSR;MFENGFINSPIVISPTTTVGEVK;NQNYPLASK;QLLCGAAIGTIEADKER;TASAQLEGGVHNLHSYEKR;WIKETFPDLEIIAGNVATR;YFSESDSVLVAQGVSGAVVDK;YFSESDSVLVAQGVSGAVVDKGSIK;YFSESDSVLVAQGVSGAVVDKGSIKK	7	0	2	0	0	7	0	2	0	0	45	2.9	18.1	2.9	2.9	7	0	1	0	0	+	6.46987	7.95758	0	34.303	27	56.393	3.73294	6.73483	23.3894	22.9772	23.6106	17.3272	18.1547	16.5163	17.2419	15.6751	16.8558	16.4242	16.4752	16.3228
Color [DarkGray]	1	4	P0CX36;P0CX35	P0CX36;P0CX35	40S ribosomal protein S4-B;40S ribosomal protein S4-A	RPS4B;RPS4A	RS4B_YEAST 40S ribosomal protein S4-B OS=Saccharomyces cerevisiae (strain ATCC 204508 / S288c) OX=559292 GN=RPS4B PE=1 SV=1;RS4A_YEAST 40S ribosomal protein S4-A OS=Saccharomyces cerevisiae (strain ATCC 204508 / S288c) OX=559292 GN=RPS4A PE=1 SV=1	ESLPLIVFLR;GVPYVVTHDGR;HDGGFDLVHIKDSLDNTFVTR;ITDEEASYK;ITDFIKFDAGK;KVQLGKK;LAAPHHWLLDK;LNNVFVIGEQGKPYISLPK;LRESLPLIVFLR;LSGCYAPR;LSIAEERDR;TDTTYPAGFMDVITLDATNENFR;VRTDTTYPAGFMDVITLDATNENFR	10	10	1	0	6	10	10	1	0	6	47.1	44.8	8	0	31	6	6	0	0	3	+	6.77061	8.21943	0	14.59	55	29.41	5.25233	6.70308	23.182	23.094	23.189	21.4236	21.6787	21.608	16.1425	16.3701	16.8432	20.088	19.4314	20.0481
Color [DarkGray]	1	4	P50095;P38697	P50095;P38697	Inosine-5-monophosphate dehydrogenase 3;Inosine-5-monophosphate dehydrogenase 2	IMD3;IMD2	IMDH3_YEAST Inosine-5-monophosphate dehydrogenase 3 OS=Saccharomyces cerevisiae (strain ATCC 204508 / S288c) OX=559292 GN=IMD3 PE=1 SV=1;IMDH2_YEAST Inosine-5-monophosphate dehydrogenase 2 OS=Saccharomyces cerevisiae (strain ATCC 204508 / S288c) OX=55929	ALALGSSTVMMGGMLAGTTESPGEYFYQDGKR;DIQFVEDNSLLVQDVMTK;EQAANLIAAGADGLR;ETFPDLEIIAGNVATR;FGFSGFPVTEDGK;FGFSGFPVTEDGKR;FIPYLYNGLQHSCQDIGYK;GGLTYNDFLVLPGLVDFPSSEVSLQTK;GMGSIDAMQK;LDGLSVQELMDSK;LLIVDDNGNLVSMLSR;NPVTGAQGITLSEGNEILK;NQNYPLASK;QLLCGAAIGTIDADKER;SLTLLKENVQSGK;TASAQLEGGVHNLHSYEKR;VKNYENGFINNPIVISPTTTVGEAK;WIKETFPDLEIIAGNVATR;YFSESDSVLVAQGVSGAVVDK;YFSESDSVLVAQGVSGAVVDKGSIK;YFSESDSVLVAQGVSGAVV…	20	1	6	2	1	10	0	2	1	0	57.6	2.9	15.3	6.1	2.9	31	1	1	1	1	+	7.12408	8.65404	0	80.357	113	56.584	4.99054	6.56696	24.813	25.0016	24.9156	18.5116	18.5864	18.2681	18.0928	18.131	18.8054	17.6629	17.1758	17.9012
Color [DarkGray]	1	4	P14126	P14126	60S ribosomal protein L3	RPL3	RL3_YEAST 60S ribosomal protein L3 OS=Saccharomyces cerevisiae (strain ATCC 204508 / S288c) OX=559292 GN=RPL3 PE=1 SV=4	AHLAEIQLNGGSISEK;GHGFEGVTHR;HAFMGTLK;HGHLGFLPR;KALEEVSLK;KSLYTNTSR;SKPVALTSFLGYK;SLTTVWAEHLSDEVK;SLYTNTSR;TITPMGGFVHYGEIKNDFIMVK;TVAVDSVFEQNEMIDAIAVTK;VGKGDDEANGATSFDR;VLVHTQIR;YAQDGAGIER	10	14	0	0	1	10	14	0	0	1	32.8	42.9	0	0	2.3	9	15	0	0	0	+	7.24388	8.59209	0	26.67	62	43.757	3.51342	6.45354	23.0207	22.7983	23.5731	24.4017	23.4718	24.2686	15.6733	17.1764	17.1818	16.6919	16.6907	17.6701
Color [DarkGray]	1	4	Q12159	Q12159	RNA annealing protein YRA1	YRA1	YRA1_YEAST RNA annealing protein YRA1 OS=Saccharomyces cerevisiae (strain ATCC 204508 / S288c) OX=559292 GN=YRA1 PE=1 SV=2	APPNAVAR;EFFASQVGGVQR;EVKVNVEGLPR;FNGSPIDGGR;GGNAPRPVK;GQSTGMANITFK;SLEDLDKEMADYFEK;SLEDLDKEMADYFEKK;VLLSYNER;VNVEGLPR	10	6	4	3	5	10	6	4	3	5	38.1	25.2	19.5	14.2	24.8	10	7	0	0	3	+	7.43348	8.59067	0	26.376	63	24.955	3.59624	6.42253	24.7352	24.6816	24.2153	23.5626	23.2455	23.4676	18.4549	17.1444	18.7653	21.222	21.1287	19.8597
Color [DarkGray]	1	4	P33322	P33322	H/ACA ribonucleoprotein complex subunit 4	CBF5	CBF5_YEAST H/ACA ribonucleoprotein complex subunit CBF5 OS=Saccharomyces cerevisiae (strain ATCC 204508 / S288c) OX=559292 GN=CBF5 PE=1 SV=1	DSAVNAVCYGAK;EYVPLDNAEQSTSSSQETK;EYVPLDNAEQSTSSSQETKETEEEPK;EYVPLDNAEQSTSSSQETKETEEEPKK;GEAIAVAIAQMSTVDLASCDHGVVASVK;IVVKDSAVNAVCYGAK;LHDALKDEKDLGR;NLGVFWASCEAGTYMR;SGALSENDNMVTLHDVMDAQWVYDNTR;SGALSENDNMVTLHDVMDAQWVYDNTRDESYLR;SGHYTPIPAGSSPLKR;SIIQPLETLLVGYK;SIIQPLETLLVGYKR;SKEDFVIKPEAAGASTDTSEWPLLLK;SLENLTGALFQRPPLISAVK;SQQGAGKEYVCIVR;SYISSGVINLDKPSNPSSHEVVAWIK;SYISSGVINLDKPSNPSSHEVVAWIKR;TGHSGT…	15	23	0	0	8	15	23	0	0	8	38.7	64.6	0	0	27.1	9	38	0	0	7	+	7.01515	8.9858	0	277.44	179	54.704	4.64091	6.26118	22.6356	22.9432	22.9096	24.6406	24.6315	24.5057	16.0486	16.8271	16.8293	21.0976	20.3304	21.1503
Color [DarkGray]	1	4	P0CX50;P0CX49	P0CX50;P0CX49	60S ribosomal protein L18-B;60S ribosomal protein L18-A	RPL18B;RPL18A	RL18B_YEAST 60S ribosomal protein L18-B OS=Saccharomyces cerevisiae (strain ATCC 204508 / S288c) OX=559292 GN=RPL18B PE=1 SV=1;RL18A_YEAST 60S ribosomal protein L18-A OS=Saccharomyces cerevisiae (strain ATCC 204508 / S288c) OX=559292 GN=RPL18A PE=1 SV=1	AGGECITLDQLAVR;ALKQEGAANK;GQNTLILR;HFGMGPHK	2	2	0	1	2	2	2	0	1	2	12.9	12.9	0	7.5	12.9	2	2	0	0	0	+	6.96025	8.00165	0	16.482	13	20.563	3.97287	6.18987	23.021	22.2928	23.0876	23.6766	23.3014	23.7277	17.2395	16.2975	16.2948	18.3272	16.1472	18.1209
Color [DarkGray]	1	4	P26785	P26785	60S ribosomal protein L16-B	RPL16B	RL16B_YEAST 60S ribosomal protein L16-B OS=Saccharomyces cerevisiae (strain ATCC 204508 / S288c) OX=559292 GN=RPL16B PE=1 SV=3	AEALNISGEFFR;KVSSASAAASESDVAK;LSTSVGWKYEDVVAK;QLASFGY;SQPVVVIDAKDHLLGR;VSSASAAASESDVAK;VVVPQALR	7	7	0	0	2	5	5	0	0	2	37.4	37.4	0	0	14.1	4	3	0	0	2	+	6.9693	8.14492	0	61.82	27	22.249	3.20102	6.13589	22.7608	22.0414	22.7132	22.0678	22.5593	22.6035	15.2403	16.6511	17.2163	17.0693	20.2269	19.4914
Color [DarkGray]	1	4	P0CX44;P0CX43	P0CX44;P0CX43	60S ribosomal protein L1-B;60S ribosomal protein L1-A	RPL1B;RPL1A	RL1B_YEAST 60S ribosomal protein L1-B OS=Saccharomyces cerevisiae (strain ATCC 204508 / S288c) OX=559292 GN=RPL1B PE=1 SV=1;RL1A_YEAST 60S ribosomal protein L1-A OS=Saccharomyces cerevisiae (strain ATCC 204508 / S288c) OX=559292 GN=RPL1A PE=1 SV=1	AGKFPTPVSHNDDLYGK;AGKFPTPVSHNDDLYGKVTDVR;EHVKELLK;FPTPVSHNDDLYGK;FPTPVSHNDDLYGKVTDVR;KYNAFIASEVLIK;NFLETVELQVGLK;NWQNVGSLVVK;SCGVDAMSVDDLKK;YNAFIASEVLIK	8	8	0	0	1	8	8	0	0	1	36.9	35	0	0	6	5	8	0	0	0	+	7.06993	8.24697	0	32.262	42	24.485	4.59513	6.03522	22.9396	22.9257	22.9564	22.9238	22.3544	22.927	17.0757	17.2722	16.3681	15.9582	15.6292	16.7513
Color [DarkGray]	1	4	P40212	P40212	60S ribosomal protein L13-B	RPL13B	RL13B_YEAST 60S ribosomal protein L13-B OS=Saccharomyces cerevisiae (strain ATCC 204508 / S288c) OX=559292 GN=RPL13B PE=1 SV=1	AAGLTAAYAR;APEAEQVLSAAATFPIAQPATDVEAR;AVQDNGESAFR;DGKAPEAEQVLSAAATFPIAQPATDVEAR;NQEIFDANVQR;TIGIAVDHR;TIGIAVDHRR;VKVHFDQAGKK	7	8	0	0	2	1	1	0	0	0	40.7	41.2	0	0	11.1	5	7	0	0	0	+	7.17863	8.38072	0	23.224	43	22.525	4.62817	6.02466	22.6997	22.8294	22.8795	23.5571	23.4368	23.6374	16.8994	16.2732	17.162	18.9188	17.4574	17.3902
Color [DarkGray]	1	4	P27476	P27476	Nuclear localization sequence-binding protein	NSR1	NSR1_YEAST Nuclear localization sequence-binding protein OS=Saccharomyces cerevisiae (strain ATCC 204508 / S288c) OX=559292 GN=NSR1 PE=1 SV=1	EIDGRPINCDMSTSKPAGNNDR;GFGYVQFSNMEDAKK;IPTHPETEQPK;KEFEHIGGVIGAR;NEETEEPATIFVGR;SEDAEEEEDEESSNKK	3	4	1	0	0	3	4	1	0	0	9.7	15.5	2.7	0	0	3	3	0	0	0	+	6.20504	7.79376	0	38.021	25	44.535	3.91495	5.93422	21.9706	22.5945	22.5576	20.9341	21.368	21.5219	15.9558	16.2527	17.1116	16.3148	16.229	18.4596
Color [DarkGray]	1	4	P31111	P31111	Synaptonemal complex protein ZIP1	ZIP1	ZIP1_YEAST Synaptonemal complex protein ZIP1 OS=Saccharomyces cerevisiae (strain ATCC 204508 / S288c) OX=559292 GN=ZIP1 PE=1 SV=2	AEIVQSNEYEER;AHELELEEQNR;ALVSENDTLK;APLHTSINNSSTSSNDVLLEAFTNTQR;ELDDCSGQLSEEK;ESHGDPNDSETTLKDSK;ETGVEESLSDVK;ETSKFNDEFDLSSSSNDDLELTNPSPIQIKPVR;ICSNLKQELQK;KTTSTDQYNR;LLLVEDEDQSLK;LNVEVVQLK;NENLSNELKK;QDITAEKLELQDNLESLEEVTK;QQYEDIKENLEQK;SCLETLQER;SEKQDITAEKLELQDNLESLEEVTK;TSIENLNK;TSTEQELITSMSLSQR	16	1	1	0	0	16	1	1	0	0	24.6	1	1.1	0	0	9	1	0	0	0	+	6.07668	7.99143	0	52.688	46	100.03	3.59473	5.83921	22.6311	22.2622	22.6238	15.8907	16.8548	15.8688	15.7528	17.2237	17.0229	17.0746	16.9957	16.6172
Color [DarkGray]	1	4	P54780;P05748	P54780;P05748	60S ribosomal protein L15-B;60S ribosomal protein L15-A	RPL15B;RPL15A	RL15B_YEAST 60S ribosomal protein L15-B OS=Saccharomyces cerevisiae (strain ATCC 204508 / S288c) OX=559292 GN=RPL15B PE=1 SV=2;RL15A_YEAST 60S ribosomal protein L15-A OS=Saccharomyces cerevisiae (strain ATCC 204508 / S288c) OX=559292 GN=RPL15A PE=1 SV=3	AKQGFVIYR;GATYGKPTNQGVNELK;VLNSYWVNQDSTYK;YFEVILVDPQHK;YNWICNPVHK	4	5	0	0	0	4	5	0	0	0	25	29.9	0	0	0	6	8	0	0	0	+	7.10438	8.31385	0	51.144	40	24.422	3.57494	5.7309	21.6981	22.5267	22.6778	23.6204	23.6259	23.5042	16.0539	16.3885	17.2675	15.071	16.8845	17.4492
Color [DarkGray]	1	4	P0CX40;P0CX39	P0CX40;P0CX39	40S ribosomal protein S8-B;40S ribosomal protein S8-A	RPS8B;RPS8A	RS8B_YEAST 40S ribosomal protein S8-B OS=Saccharomyces cerevisiae (strain ATCC 204508 / S288c) OX=559292 GN=RPS8B PE=1 SV=1;RS8A_YEAST 40S ribosomal protein S8-A OS=Saccharomyces cerevisiae (strain ATCC 204508 / S288c) OX=559292 GN=RPS8A PE=1 SV=1	AAIVQIDATPFR;CDGYILEGEELAFYLR;CDGYILEGEELAFYLRR;IAGVVYHPSNNELVR;IESSVESQFSAGR;IETGNFSWASEGISK;IETGNFSWASEGISKK;LYACISSRPGQSGR;QWFEAHYGQTLGK	5	8	0	0	1	5	8	0	0	1	35	49.5	0	0	6	4	10	0	0	0	+	7.06543	8.25416	0	47.321	42	22.489	3.99332	5.59649	22.8318	22.6983	22.8536	23.2647	23.3058	23.3253	17.4605	17.6442	16.4897	16.9025	16.6138	15.6988
Color [DarkGray]	1	4	P0CX46;P0CX45	P0CX46;P0CX45	60S ribosomal protein L2-B;60S ribosomal protein L2-A	RPL2B;RPL2A	RL2B_YEAST 60S ribosomal protein L2-B OS=Saccharomyces cerevisiae (strain ATCC 204508 / S288c) OX=559292 GN=RPL2B PE=1 SV=1;RL2A_YEAST 60S ribosomal protein L2-A OS=Saccharomyces cerevisiae (strain ATCC 204508 / S288c) OX=559292 GN=RPL2A PE=1 SV=1	ASGNYVIIIGHNPDENK;ASLNVGNVLPLGSVPEGTIVSNVEEKPGDR;GAGSIFTSHTR;GVAMNPVDHPHGGGNHQHIGK;KASLNVGNVLPLGSVPEGTIVSNVEEKPGDR;KGAGSIFTSHTR	6	5	1	0	1	6	5	1	0	1	31.9	25.2	4.3	0	12.2	7	2	0	0	0	+	6.19265	7.92184	0	26.513	23	27.408	2.39777	5.52778	23.8965	21.8039	23.0615	21.1991	21.4211	20.9245	16.0674	18.4573	17.6539	18.8833	18.6077	15.8189
Color [DarkGray]	1	4	P17076	P17076	60S ribosomal protein L8-A	RPL8A	RL8A_YEAST 60S ribosomal protein L8-A OS=Saccharomyces cerevisiae (strain ATCC 204508 / S288c) OX=559292 GN=RPL8A PE=1 SV=4	AEDEAALAK;LGTLVNQK;LKVPPTIAQFQYTLDR;LVLIANDVDPIELVVFLPALCK;LVSTIDANFADKYDEVK;LVSTIDANFADKYDEVKK;NFGIGQAVQPK;NPLTHSTPK;TSAVAALTEVR;TSAVAALTEVRAEDEAALAK;YGLNHVVALIENK;YGLNHVVALIENKK;YRPETAAEK	5	12	0	0	0	0	1	0	0	0	22.3	49.6	0	0	0	6	12	0	0	0	+	7.06179	8.48204	0	34.409	54	28.124	2.88937	5.40965	23.0062	22.8663	22.8408	23.6388	23.4952	23.7437	16.5349	18.7836	17.1658	15.8086	16.1532	17.9941
Color [DarkGray]	1	4	P07260	P07260	Eukaryotic translation initiation factor 4E	CDC33	IF4E_YEAST Eukaryotic translation initiation factor 4E OS=Saccharomyces cerevisiae (strain ATCC 204508 / S288c) OX=559292 GN=CDC33 PE=1 SV=1	FEENVSVDDTTATPK;GADIDELWLR;GKGADIDELWLR;KFEENVSVDDTTATPK;NDVRPEWEDEANAK;SEDKEPLLR;TVLSDSAHFDVK	5	1	3	1	2	5	1	3	1	2	23	4.7	17.4	4.2	8.9	2	0	0	0	0	+	6.61102	7.86037	0	47.738	24	24.254	3.6783	5.35825	22.2815	23.43	23.5725	16.6958	17.1583	17.2286	17.675	17.642	17.8923	18.4547	18.3427	18.7094
Color [DarkGray]	1	4	P0CX30;P0CX29	P0CX30;P0CX29	40S ribosomal protein S23-B;40S ribosomal protein S23-A	RPS23B;RPS23A	RS23B_YEAST 40S ribosomal protein S23-B OS=Saccharomyces cerevisiae (strain ATCC 204508 / S288c) OX=559292 GN=RPS23B PE=1 SV=1;RS23A_YEAST 40S ribosomal protein S23-A OS=Saccharomyces cerevisiae (strain ATCC 204508 / S288c) OX=559292 GN=RPS23A PE=1 SV=1	SSPFGGSSHAK;VSGVSLLALWK;VTAFVPNDGCLNFVDENDEVLLAGFGR	1	3	0	0	0	1	3	0	0	0	7.6	33.8	0	0	0	0	5	0	0	0	+	6.85014	7.69524	0	8.4659	17	16.038	3.24408	5.3448	22.2117	22.0403	22.0484	23.1222	23.2308	23.0458	16.2671	16.1777	17.8211	16.865	16.7842	17.4729
Color [DarkGray]	1	4	P15424	P15424	ATP-dependent RNA helicase MSS116, mitochondrial	MSS116	MS116_YEAST ATP-dependent RNA helicase MSS116, mitochondrial OS=Saccharomyces cerevisiae (strain ATCC 204508 / S288c) OX=559292 GN=MSS116 PE=1 SV=1	AIIFAPTVK;DESGILVCTDVGAR;DLPILEFHGK;ECLFLDTVDKNEPEAHER;EGSSVLFICKDELPFVR;ELEDAKNIVIAK;EVTLDSLLEEGVLDKEIHK;FANSIFAAVEHIK;FANSIFAAVEHIKK;FKKDESGILVCTDVGAR;FTSFLCSILK;IDQSVVISEK;ILPEIASTYGVLLNDPQLK;LIDVLEK;MEFPGLTPVQQK;SEVLEAVTEEPEDISDIVISLISSYR;TIKPILSSEDHDVIAR;TLLFSATLDDKVQK	10	10	0	0	1	10	10	0	0	1	18.5	22.9	0	0	1.8	6	6	0	0	0	+	6.04191	7.86432	0	24.21	43	76.268	4.91656	5.33209	22.2075	21.9461	22.0992	21.0666	21.2047	21.1859	17.1255	16.5656	16.5654	19.777	15.718	16.928
Color [DarkGray]	1	4	Q02207	Q02207	Peroxisomal hydratase-dehydrogenase-epimerase;2-enoyl-CoA hydratase;(3R)-3-hydroxyacyl-CoA dehydrogenase	FOX2	FOX2_YEAST Peroxisomal hydratase-dehydrogenase-epimerase OS=Saccharomyces cerevisiae (strain ATCC 204508 / S288c) OX=559292 GN=FOX2 PE=2 SV=1	AADLVVDEIKK;AGGIAVANYDSVNENGEK;ELSNHFDASQVSPLVVLLASEELQK;IINTASPAGLFGNFGQANYSAAK;LSGDFNPLHIDPTLAK;LYGEGTAIPDSHDVVTEAPLIIQTAISK;NTINPSSTEESSMATLQAVQK;NVIVLDNAAVK;QGSVVVFQTIDTTR;SGFIINTTSTSGIYGNFGQANYAAAK;TLAKPLQVLDKNGK;TQHPYQLSDYNDLITK;VDILVNNAGILR;VPDFEAEISTNKDQAALYR;VVVITGAGGGLGK;VVVNDLGGTLGGSGHNSK;VVVVTGAGGGLGK;VYALAYASR;YNINVNSIAPLAR	14	3	0	1	1	14	3	0	1	1	26.2	4.6	0	1.2	1.6	10	0	0	0	1	+	6.01191	8.01026	0	95.703	46	98.702	3.73132	5.29376	22.4652	22.9498	22.9862	16.4253	17.8095	17.9429	16.7855	17.825	17.9095	17.7428	17.2856	18.1909
Color [DarkGray]	1	4	P32495	P32495	H/ACA ribonucleoprotein complex subunit 2	NHP2	NHP2_YEAST H/ACA ribonucleoprotein complex subunit NHP2 OS=Saccharomyces cerevisiae (strain ATCC 204508 / S288c) OX=559292 GN=NHP2 PE=1 SV=2	GLVVIAGDISPADVISHIPVLCEDHSVPYIFIPSK;MPAVLPFAKPLASK;NKEEEYKESFNEVVK;QDLGAAGATK;RPTSVVFIVPGSNK;TVDNYEAR	3	6	0	0	2	3	6	0	0	2	27.6	61.5	0	0	18.6	3	9	0	0	0	+	7.33187	8.32858	0	97.525	33	17.122	4.63875	5.27261	22.1363	21.9443	21.815	23.7215	23.3701	23.7438	16.9916	16.8097	16.2765	19.6833	19.9486	18.9199
Color [DarkGray]	1	4	P0CX83;P0CX82	P0CX83;P0CX82	60S ribosomal protein L19-B;60S ribosomal protein L19-A	RPL19B;RPL19A	RL19B_YEAST 60S ribosomal protein L19-B OS=Saccharomyces cerevisiae (strain ATCC 204508 / S288c) OX=559292 GN=RPL19B PE=1 SV=1;RL19A_YEAST 60S ribosomal protein L19-A OS=Saccharomyces cerevisiae (strain ATCC 204508 / S288c) OX=559292 GN=RPL19A PE=1 SV=1	ALNEEAEAR;ALVEHIIQAK;HLYHVLYK;IDKHLYHVLYK;KAVTVHSK;KVWLDPNETSEIAQANSR;LAASVVGVGK;LAASVVGVGKR;LPSQVVWIR;VWLDPNETSEIAQANSR	6	9	0	0	1	6	9	0	0	1	25.9	35.4	0	0	4.8	5	9	0	0	0	+	7.14656	8.11949	0	100.71	50	21.704	5.22131	5.25423	21.5987	21.7733	22.109	23.0741	22.9781	20.9147	16.4272	16.6453	16.6458	16.9489	17.1046	17.613
Color [DarkGray]	1	4	P14120	P14120	60S ribosomal protein L30	RPL30	RL30_YEAST 60S ribosomal protein L30 OS=Saccharomyces cerevisiae (strain ATCC 204508 / S288c) OX=559292 GN=RPL30 PE=1 SV=3	KSELEYYAMLSK;TKVYYFQGGNNELGTAVGK;VGVVSILEAGDSDILTTLA;VYYFQGGNNELGTAVGK	3	4	1	0	1	3	4	1	0	1	45.7	47.6	18.1	0	18.1	3	3	0	0	0	+	6.96988	7.77679	0	121.75	21	11.415	2.84403	5.07498	21.71	21.7868	21.3737	21.262	22.2975	21.0064	17.8187	15.9166	15.9104	18.9868	19.2312	19.4072
Color [DarkGray]	1	4	P30771	P30771	ATP-dependent helicase NAM7	NAM7	NAM7_YEAST ATP-dependent helicase NAM7 OS=Saccharomyces cerevisiae (strain ATCC 204508 / S288c) OX=559292 GN=NAM7 PE=1 SV=1	ILVCAPSNVAVDHLAAK;KTEAEILNK;LKDEVGELSASDTKR;QVILVGDHQQLGPVILER;SREDVESSVSNLALHNLVGR;YQDAYEYQR	4	0	1	0	0	4	0	1	0	0	5.3	0	1.9	0	0	2	0	0	0	0	+	5.06956	7.34526	0	8.5653	14	109.43	3.43092	4.98137	20.1421	21.3965	21.3694	15.1627	16.4945	16.7188	15.6671	16.0472	16.2496	16.9096	16.8291	17.4879
Color [DarkGray]	1	4	P39939;P39938	P39939;P39938	40S ribosomal protein S26-B;40S ribosomal protein S26-A	RPS26B;RPS26A	RS26B_YEAST 40S ribosomal protein S26-B OS=Saccharomyces cerevisiae (strain ATCC 204508 / S288c) OX=559292 GN=RPS26B PE=1 SV=1;RS26A_YEAST 40S ribosomal protein S26-A OS=Saccharomyces cerevisiae (strain ATCC 204508 / S288c) OX=559292 GN=RPS26A PE=1 SV=1	DLSEASVYPEYALPK;NIVEAAAVR	2	2	0	0	0	2	2	0	0	0	20.2	20.2	0	0	0	1	1	0	0	0	+	6.81124	7.4133	0	7.8964	7	13.447	3.26466	4.79073	20.9073	20.8689	20.9326	21.417	21.0302	21.4147	15.2226	16.8438	16.2703	17.7512	18.3447	17.0775
Color [DarkGray]	1	4	P12695	P12695	Dihydrolipoyllysine-residue acetyltransferase component of pyruvate dehydrogenase complex, mitochondrial	LAT1	ODP2_YEAST Dihydrolipoyllysine-residue acetyltransferase component of pyruvate dehydrogenase complex, mitochondrial OS=Saccharomyces cerevisiae (strain ATCC 204508 / S288c) OX=559292 GN=LAT1 PE=1 SV=1	GLSQISNEIKELVK	1	1	1	0	0	1	1	1	0	0	2.9	2.9	2.9	0	0	0	0	1	0	0	+	6.06871	7.43045	0.003413	1.9011	6	51.817	4.2599	4.74232	21.3426	21.0733	20.938	21.5275	21.1656	21.6721	16.8431	16.144	16.1399	16.2339	16.0721	16.1359
Color [DarkGray]	1	4	Q03735	Q03735	RNA-binding protein NAB6	NAB6	NAB6_YEAST RNA-binding protein NAB6 OS=Saccharomyces cerevisiae (strain ATCC 204508 / S288c) OX=559292 GN=NAB6 PE=1 SV=1	DYQTPTIEEHSTHLSNVK;LQGVELDGTYLEINYR;NVTHNNNKGCDTR;VLPNPITQSLEQNFNVSAK	1	2	0	0	3	1	2	0	0	3	1.1	2.7	0	0	4.1	0	1	0	0	2	+	4.95274	7.39347	0	6.9531	16	126.14	4.18656	4.67375	20.5632	20.4568	21.1821	20.4606	20.8558	20.973	15.9476	15.8815	16.3518	20.7997	20.8221	20.7582
Color [DarkGray]	1	4	P24000;P04449	P24000;P04449	60S ribosomal protein L24-B;60S ribosomal protein L24-A	RPL24B;RPL24A	RL24B_YEAST 60S ribosomal protein L24-B OS=Saccharomyces cerevisiae (strain ATCC 204508 / S288c) OX=559292 GN=RPL24B PE=1 SV=1;RL24A_YEAST 60S ribosomal protein L24-A OS=Saccharomyces cerevisiae (strain ATCC 204508 / S288c) OX=559292 GN=RPL24A PE=1 SV=1	AQRPITGASLDLIK	1	1	0	0	0	1	1	0	0	0	9	9	0	0	0	2	1	0	0	0	+	6.78341	7.48237	0	7.7019	8	17.547	4.21636	4.6485	21.6798	21.9594	21.6452	22.8801	22.4708	22.3688	17.4142	16.6295	17.2952	17.0378	16.2935	17.5331
Color [DarkGray]	1	4	P0C2H7;P0C2H6	P0C2H7;P0C2H6	60S ribosomal protein L27-B;60S ribosomal protein L27-A	RPL27B;RPL27A	RL27B_YEAST 60S ribosomal protein L27-B OS=Saccharomyces cerevisiae (strain ATCC 204508 / S288c) OX=559292 GN=RPL27B PE=1 SV=1;RL27A_YEAST 60S ribosomal protein L27-A OS=Saccharomyces cerevisiae (strain ATCC 204508 / S288c) OX=559292 GN=RPL27A PE=1 SV=1	SHPFGHALVAGIER;SVVSTETFEQPSQR;SVVSTETFEQPSQREEAK;SVVSTETFEQPSQREEAKK;VVIVKPHDEGSK;VVNYNHLLPTR;YTLDVEAFK	6	6	0	2	2	6	6	0	2	2	37.5	37.5	0	16.9	16.9	2	7	0	1	1	+	6.98852	8.04867	0	234.41	38	15.505	2.16989	4.63936	20.9444	20.6411	23.138	23.1085	20.7366	20.9542	16.5871	17.8099	16.4085	17.1462	17.4336	17.3263
Color [DarkGray]	1	4	P0CX54;P0CX53	P0CX54;P0CX53	60S ribosomal protein L12-B;60S ribosomal protein L12-A	RPL12B;RPL12A	RL12B_YEAST 60S ribosomal protein L12-B OS=Saccharomyces cerevisiae (strain ATCC 204508 / S288c) OX=559292 GN=RPL12B PE=1 SV=1;RL12A_YEAST 60S ribosomal protein L12-A OS=Saccharomyces cerevisiae (strain ATCC 204508 / S288c) OX=559292 GN=RPL12A PE=1 SV=1	HSGNIQLDEIIEIAR;NPHDIIEGINAGEIEIPEN;QAAASVVPSASSLVITALK;VDFKNPHDIIEGINAGEIEIPEN	2	3	1	1	2	2	3	1	1	2	20.6	23	9.1	9.1	23	2	4	1	0	1	+	6.30313	7.96793	0	14.116	21	17.822	1.58761	4.61446	21.8815	22.4818	22.0626	23.5541	23.9357	22.3493	20.1719	16.207	16.2035	20.9027	19.8202	19.2651
Color [DarkGray]	1	4	P32790	P32790	Actin cytoskeleton-regulatory complex protein SLA1	SLA1	SLA1_YEAST Actin cytoskeleton-regulatory complex protein SLA1 OS=Saccharomyces cerevisiae (strain ATCC 204508 / S288c) OX=559292 GN=SLA1 PE=1 SV=1	IAVAADKLSNEDLAYVEK;SGDKVYILDDKK;VIGSDSEEPVGLVPSTYIEEAPVLK	1	0	0	0	0	1	0	0	0	0	1	0	0	0	0	0	0	0	0	0	+	4.4532	7.03571	0	3.4553	4	135.85	3.05782	4.60846	20.5336	21.0396	20.9666	15.8082	17.8941	19.8586	16.4188	16.9859	15.3096	16.0898	16.4235	16.2517
Color [DarkGray]	1	4	P28007	P28007	H/ACA ribonucleoprotein complex subunit 1	GAR1	GAR1_YEAST H/ACA ribonucleoprotein complex subunit GAR1 OS=Saccharomyces cerevisiae (strain ATCC 204508 / S288c) OX=559292 GN=GAR1 PE=1 SV=1	CGDGVQATSFK;EGDKFYIAADK;EGDKFYIAADKLLPIER;FYIAADKLLPIER;IPYFNAPIYLENK;SFQQGPPDTVLEMGAFLHPCEGDIVCR;TQVGKVDEILGPLNEVFFTIK;VDEILGPLNEVFFTIK	7	8	0	0	4	7	8	0	0	4	43.4	43.4	0	0	29.8	3	11	0	0	0	+	7.01708	8.12652	0	35.542	47	21.48	6.04188	4.59359	21.499	21.4818	21.4771	23.1509	23.0433	23.1521	16.7172	17.0189	16.941	19.2839	18.9743	19.5557
Color [DarkGray]	1	4	P25443	P25443	40S ribosomal protein S2	RPS2	RS2_YEAST 40S ribosomal protein S2 OS=Saccharomyces cerevisiae (strain ATCC 204508 / S288c) OX=559292 GN=RPS2 PE=1 SV=3	CGSVTVR;EFQIIDTLLPGLQDEVMNIKPVQK;GSGIVASPAVK;GSGIVASPAVKK;GYWGTNLGQPHSLATK;ITTIEEIFLHSLPVK;LLQLAGVEDVYTQSNGK;LSVIPIR	5	4	1	1	2	5	4	1	1	2	33.1	26.4	4.7	4.7	14.2	3	6	0	0	1	+	6.45063	7.86401	0	20.608	36	27.449	2.20278	4.46926	22.1615	22.569	21.179	21.2073	22.5026	22.081	18.9785	16.9026	16.6205	20.4815	20.3524	19.0997
Color [DarkGray]	1	4	P03874	P03874	Cytochrome B pre-mRNA-processing protein 2	CBP2	CBP2_YEAST Cytochrome B pre-mRNA-processing protein 2 OS=Saccharomyces cerevisiae (strain ATCC 204508 / S288c) OX=559292 GN=CBP2 PE=1 SV=2	IASPLCTLNER;ILANEEGKPFYLDANSATTR;IPTDQASLINYK;IVDNIIGLLSNDEEH;NAIPEIFQTLLK	3	0	0	0	0	3	0	0	0	0	7.5	0	0	0	0	1	0	0	0	0	+	5.21059	7.07657	0	11.265	7	73.86	3.78772	4.46651	20.8722	21.4753	21.3164	16.4215	16.6425	16.624	16.4109	17.2888	16.5647	16.3142	16.9586	17.2596
Color [DarkGray]	1	4	P0CX32;P0CX31	P0CX32;P0CX31	40S ribosomal protein S24-B;40S ribosomal protein S24-A	RPS24B;RPS24A	RS24B_YEAST 40S ribosomal protein S24-B OS=Saccharomyces cerevisiae (strain ATCC 204508 / S288c) OX=559292 GN=RPS24B PE=1 SV=1;RS24A_YEAST 40S ribosomal protein S24-A OS=Saccharomyces cerevisiae (strain ATCC 204508 / S288c) OX=559292 GN=RPS24A PE=1 SV=1	ANVSKDELR;KQFVVDVLHPNR;YGLAEKVEK	3	3	0	1	2	3	3	0	1	2	22.2	22.2	0	6.7	15.6	2	2	0	0	1	+	6.7737	7.73502	0	4.3339	14	15.329	1.76352	4.45717	21.4065	22.0342	22.0749	21.3799	21.5748	21.6574	19.5992	16.4905	16.0543	20.6648	20.8108	21.2553
Color [DarkGray]	1	4	P33442	P33442	40S ribosomal protein S1-A	RPS1A	RS3A1_YEAST 40S ribosomal protein S1-A OS=Saccharomyces cerevisiae (strain ATCC 204508 / S288c) OX=559292 GN=RPS1A PE=1 SV=2	APSTFENR;DIFPLQNIHVR;EVQGSTLAQLTSK;FDVGALMALHGEGSGEEK;HSYAQSSHIR;LIPEVINKEIENATK;LRVDEVQGK;NLLTNFHGMDFTTDKLR;VVEVCLADLQGSEDHSFR	6	8	0	1	2	1	1	0	0	0	29.8	40	0	3.9	10.6	3	7	0	0	1	+	6.43114	7.99354	0	25.766	38	28.743	1.71152	4.3843	20.8241	21.8432	22.7375	22.5679	22.1631	22.5131	18.446	15.3782	18.4278	17.9983	18.5675	18.4319
Color [DarkGray]	1	4	P26784	P26784	60S ribosomal protein L16-A	RPL16A	RL16A_YEAST 60S ribosomal protein L16-A OS=Saccharomyces cerevisiae (strain ATCC 204508 / S288c) OX=559292 GN=RPL16A PE=1 SV=3	AEELNISGEFFR;LSTSVGWKYEDVVAK;SVEPVVVIDGKGHLVGR;VASANATAAESDVAK;VVVPQALR	3	2	0	0	0	3	2	0	0	0	33.7	26.1	0	0	0	1	2	0	0	0	+	6.07886	7.23325	0	7.3726	11	22.201	3.8932	4.3834	21.1123	20.8164	20.8405	20.5102	20.5739	20.7861	16.6934	16.9378	15.9879	16.9254	16.9904	16.4161
Color [DarkGray]	1	4	P05317	P05317	60S acidic ribosomal protein P0	RPP0	RLA0_YEAST 60S acidic ribosomal protein P0 OS=Saccharomyces cerevisiae (strain ATCC 204508 / S288c) OX=559292 GN=RPP0 PE=1 SV=2	AGAVAPEDIWVR;AVNTGMEPGK;AVNTGMEPGKTSFFQALGVPTK;GFLSDLPDFEK;GFLSDLPDFEKLLPFVK;GNVGFVFTNEPLTEIK;GTIEIVSDVK;LREYLEEYK;SLFVVGVDNVSSQQMHEVR;SLFVVGVDNVSSQQMHEVRK;TSFFQALGVPTK	8	11	0	1	1	8	11	0	1	1	28.8	34	0	3.2	3.8	5	15	0	0	0	+	7.27802	8.46106	0	141.64	53	33.717	3.09322	4.33981	21.2343	21.4368	21.6258	24.1434	24.039	24.3038	17.1187	16.2778	17.8811	16.148	17.1427	16.56
Color [DarkGray]	1	4	Q12114	Q12114	Chitin biosynthesis protein CHS5	CHS5	CHS5_YEAST Chitin biosynthesis protein CHS5 OS=Saccharomyces cerevisiae (strain ATCC 204508 / S288c) OX=559292 GN=CHS5 PE=1 SV=1	GFYLDADQSILK;GSEAEDDINNVSK;HVAIDTTHFVCNDLDNEESNEELIR;ISGLSVDTPYEFQLK	3	3	0	0	0	3	3	0	0	0	6	7.7	0	0	0	3	3	0	0	0	+	5.69887	7.30724	0	15.695	20	73.638	3.09662	4.30592	21.0521	20.8178	20.8708	20.2884	20.7001	20.4189	15.9373	17.505	16.3807	16.5693	16.4858	16.4699
Color [DarkGray]	1	4	Q05022	Q05022	rRNA biogenesis protein RRP5	RRP5	RRP5_YEAST rRNA biogenesis protein RRP5 OS=Saccharomyces cerevisiae (strain ATCC 204508 / S288c) OX=559292 GN=RRP5 PE=1 SV=1	ASVLELSMKPSELK;FAQLEFAK;FIGLVLPSYAVDSR;IGTELTGLVIDKDTR;LLDVDADR;LLPGAVFLGNITK;QVANEAASDVLFGNESVK;RIDLWNVYVDQEVK;SIEDHGATLDVGLPGFTGFIAK;SLVNIEDNELPLVSTYENAK;STEGLDAFPIGYTFESCSIK;STSKDSEASSANSDEAR;VDIAEVFDTYEEITDK;VLGYSPVDDIYQLSTDPK;VLILSNLPHILK;VSNEQAAQQKDTIENIVPGR	6	0	0	1	0	6	0	0	1	0	6.3	0	0	0.8	0	3	0	0	1	0	+	5.27156	7.38297	0	90.244	26	193.13	1.91329	4.20315	20.8099	21.7248	20.9367	15.9543	17.6867	16.2632	16.0785	15.982	18.8015	17.1163	16.7558	16.3249
Color [DarkGray]	1	4	Q06839	Q06839	PX domain-containing protein YPR097W	YPR097W	YP097_YEAST PX domain-containing protein YPR097W OS=Saccharomyces cerevisiae (strain ATCC 204508 / S288c) OX=559292 GN=YPR097W PE=1 SV=2	ALIDVSNLENQIR;FFLSGPNLDIKDINPK;LMPYTVMGQIMK	2	1	2	0	2	2	1	2	0	2	2.7	1.1	2.7	0	2.7	1	1	1	0	1	+	5.20798	7.03282	0	18.219	9	123.08	3.79769	4.18614	20.2873	20.9646	20.516	15.8036	16.1871	16.2112	16.1772	16.1717	16.8606	19.3328	16.3414	17.0245
Color [DarkGray]	1	4	P46990;P05740	P46990;P05740	60S ribosomal protein L17-B;60S ribosomal protein L17-A	RPL17B;RPL17A	RL17B_YEAST 60S ribosomal protein L17-B OS=Saccharomyces cerevisiae (strain ATCC 204508 / S288c) OX=559292 GN=RPL17B PE=1 SV=2;RL17A_YEAST 60S ribosomal protein L17-A OS=Saccharomyces cerevisiae (strain ATCC 204508 / S288c) OX=559292 GN=RPL17A PE=1 SV=4	ETAQAINGWELTK;FVQGLLQNAAANAEAK	1	0	0	0	0	1	0	0	0	0	8.7	0	0	0	0	1	0	0	0	0	+	5.84435	6.68945	0	4.2899	5	20.551	2.69581	3.95302	21.0245	20.8171	20.9154	17.6662	18.2594	15.739	18.055	16.3014	16.5415	16.0272	16.205	16.5922
Color [DarkGray]	1	4	P32591	P32591	SWI/SNF complex subunit SWI3	SWI3	SWI3_YEAST SWI/SNF complex subunit SWI3 OS=Saccharomyces cerevisiae (strain ATCC 204508 / S288c) OX=559292 GN=SWI3 PE=1 SV=1	LNFNQNSSK;QMNFLTNELIR;VEPETFEIPQAHEIVIPSYSK	3	2	0	0	0	3	2	0	0	0	5	2.4	0	0	0	1	1	0	0	0	+	5.06621	7.04505	0	3.5369	8	92.925	4.20372	3.93363	20.2749	20.2851	20.2361	20.2151	20.0389	20.0103	15.9106	16.4089	16.6758	16.4562	16.3716	16.4074
Color [DarkGray]	1	4	P22147	P22147	5-3 exoribonuclease 1	XRN1	XRN1_YEAST 5-3 exoribonuclease 1 OS=Saccharomyces cerevisiae (strain ATCC 204508 / S288c) OX=559292 GN=XRN1 PE=1 SV=1	DLIYSFNPQVDNLYK;GPIPIEEEFPLNSK;GWEYSNLTLNLLK;LSPDLPDEEIPTLELPK;MDLDSINPDETEEEFQNR;QLENISLEGER;SSENVQVDLANFEK;TAHKTPSKQQSEEK	4	0	0	0	0	4	0	0	0	0	3.7	0	0	0	0	2	0	0	0	0	+	5.20295	7.08361	0	19.909	17	175.46	2.37929	3.92759	21.2557	21.4875	21.4325	17.0335	15.512	17.9988	18.6391	16.3404	17.4133	17.0212	16.9419	16.1871
Color [DarkGray]	1	4	P06367;P39516	P06367;P39516	40S ribosomal protein S14-A;40S ribosomal protein S14-B	RPS14A;RPS14B	RS14A_YEAST 40S ribosomal protein S14-A OS=Saccharomyces cerevisiae (strain ATCC 204508 / S288c) OX=559292 GN=RPS14A PE=1 SV=5;RS14B_YEAST 40S ribosomal protein S14-B OS=Saccharomyces cerevisiae (strain ATCC 204508 / S288c) OX=559292 GN=RPS14B PE=1 SV=2	ADRDESSPYAAMLAAQDVAAK;DNSQVFGVAR;IEDVTPVPSDSTR;IGRIEDVTPVPSDSTR;IYASFNDTFVHVTDLSGKETIAR	2	3	3	0	3	2	3	3	0	3	19	43.8	35.8	0	35.8	1	1	1	0	2	+	5.9654	7.469	0	9.3196	26	14.536	3.8393	3.90651	20.1921	20.9026	20.1411	20.0872	20.3844	20.3494	16.7328	16.4846	16.2988	20.1006	19.6532	20.0285
Color [DarkGray]	1	4	P0CX38;P0CX37	P0CX38;P0CX37	40S ribosomal protein S6-B;40S ribosomal protein S6-A	RPS6B;RPS6A	RS6B_YEAST 40S ribosomal protein S6-B OS=Saccharomyces cerevisiae (strain ATCC 204508 / S288c) OX=559292 GN=RPS6B PE=1 SV=1;RS6A_YEAST 40S ribosomal protein S6-A OS=Saccharomyces cerevisiae (strain ATCC 204508 / S288c) OX=559292 GN=RPS6A PE=1 SV=1	EAAAEYAQLLAK;EDDVRDFVIRR;GAIVGPDLAVLALVIVK;IGQEVDGEAVGDEFK;IGQEVDGEAVGDEFKGYVFK;KGEQELEGLTDTTVPK;KGEQELEGLTDTTVPKR;TFEIDDEHRIR	5	5	2	2	4	5	5	2	2	4	27.5	27.5	14	14	25.4	2	6	0	1	3	+	6.88307	8.36678	0	93.484	43	26.996	1.17504	3.88984	22.9699	22.8629	23.2181	24.2575	24.2451	24.3153	21.4367	19.7707	16.174	21.3866	22.0061	22.0854
Color [DarkGray]	1	4	P0CX24;P0CX23	P0CX24;P0CX23	60S ribosomal protein L20-B;60S ribosomal protein L20-A	RPL20B;RPL20A	RL20B_YEAST 60S ribosomal protein L20-B OS=Saccharomyces cerevisiae (strain ATCC 204508 / S288c) OX=559292 GN=RPL20B PE=1 SV=1;RL20A_YEAST 60S ribosomal protein L20-A OS=Saccharomyces cerevisiae (strain ATCC 204508 / S288c) OX=559292 GN=RPL20A PE=1 SV=1	ASGEIVSINQINEAHPTK;IFASNEVIAK;VAAVETLYQDMAAR	1	3	0	0	0	1	3	0	0	0	10.5	24.4	0	0	0	0	2	0	0	0	+	5.82042	7.13443	0	4.1825	5	20.437	4.55551	3.85471	19.8404	19.9385	20.2053	20.9538	20.3378	20.2758	15.9435	16.0591	16.4174	16.6899	16.6075	19.0505
Color [DarkGray]	1	4	P36049	P36049	rRNA-processing protein EBP2	EBP2	EBP2_YEAST rRNA-processing protein EBP2 OS=Saccharomyces cerevisiae (strain ATCC 204508 / S288c) OX=559292 GN=EBP2 PE=1 SV=1	EVAADTEEYQSQALSK;KEEPTIVTASNLK;MQEQDATEAQK	1	2	2	0	0	1	2	2	0	0	3	6.8	5.6	0	0	0	1	2	0	0	+	6.64413	7.92289	0	3.3598	3	49.734	0.960345	3.65676	22.5137	22.6946	17.2626	23.181	16.9095	23.1321	17.0169	17.2389	17.2449	17.4192	16.2841	16.5535
Color [DarkGray]	1	4	P24719	P24719	Meiosis-specific serine/threonine-protein kinase MEK1	MEK1	MEK1_YEAST Meiosis-specific serine/threonine-protein kinase MEK1 OS=Saccharomyces cerevisiae (strain ATCC 204508 / S288c) OX=559292 GN=MEK1 PE=1 SV=1	HCDVIELSQGSEENDIKK;LLDQMGFLR	1	1	0	0	0	1	1	0	0	0	3.6	3.6	0	0	0	0	0	0	0	0	+	5.51757	6.89778	0.0066445	1.7344	2	56.849	2.85731	3.49857	20.2619	20.1174	20.8826	20.5705	17.4526	16.0485	16.491	17.6703	16.6049	15.9175	16.2042	20.7797
Color [DarkGray]	1	4	P39077	P39077	T-complex protein 1 subunit gamma	CCT3	TCPG_YEAST T-complex protein 1 subunit gamma OS=Saccharomyces cerevisiae (strain ATCC 204508 / S288c) OX=559292 GN=CCT3 PE=1 SV=2	ALTDALEVIK;DLGQTVEGEPNFEIDIKR;EIDVAHPAAK;ESDVGTNCGLFK;GGSKDILNEIDRNLQDAMAVAR;GVSDLAQHYLLK;KGESQTNIEIEKEEDWNR;NIHPVIIIQALKK;TQDEEVGDGTTTVIILAGEILAQCAPYLIEK;VTGATIVNRVEDLKESDVGTNCGLFK;VVLLDCPLEYK	3	1	9	0	0	3	1	9	0	0	7.3	2.1	25.7	0	0	1	0	8	0	0	+	5.88248	7.70963	0	21.68	29	58.814	3.73267	3.47019	20.1659	20.4242	19.9569	18.6316	17.2844	17.2203	16.6081	16.388	17.1404	15.7966	19.0683	18.2534
Color [DarkGray]	1	4	P04912;P04911	P04912;P04911	Histone H2A.2;Histone H2A.1	HTA2;HTA1	H2A2_YEAST Histone H2A.2 OS=Saccharomyces cerevisiae (strain ATCC 204508 / S288c) OX=559292 GN=HTA2 PE=1 SV=2;H2A1_YEAST Histone H2A.1 OS=Saccharomyces cerevisiae (strain ATCC 204508 / S288c) OX=559292 GN=HTA1 PE=1 SV=2	AGLTFPVGR;MSGGKGGKAGSAAK;NDDELNKLLGNVTIAQGGVLPNIHQNLLPK	2	2	0	1	2	2	2	0	1	2	29.5	29.5	0	6.8	29.5	2	3	0	0	1	+	6.65682	7.52323	0	11.13	16	13.989	6.14595	3.37946	21.944	21.835	21.8798	21.4359	21.8513	21.5471	18.5712	18.3989	18.5502	19.4777	18.8624	19.1476
Color [DarkGray]	1	4	P02293;P02294	P02293;P02294	Histone H2B.1;Histone H2B.2	HTB1;HTB2	H2B1_YEAST Histone H2B.1 OS=Saccharomyces cerevisiae (strain ATCC 204508 / S288c) OX=559292 GN=HTB1 PE=1 SV=2;H2B2_YEAST Histone H2B.2 OS=Saccharomyces cerevisiae (strain ATCC 204508 / S288c) OX=559292 GN=HTB2 PE=1 SV=2	KETYSSYIYK;LILPGELAK;MSAKAEKK;QTHPDTGISQK;SMSILNSFVNDIFER	4	4	1	3	3	4	4	1	3	3	34.4	34.4	6.1	22.9	26	3	4	1	1	2	+	7.08357	8.03782	0	26.692	30	14.252	3.42279	3.36278	22.9315	23.0889	23.1644	22.3352	22.1271	21.984	19.7441	19.1655	20.1869	20.8997	20.1694	19.871
Color [DarkGray]	1	4	P05739	P05739	60S ribosomal protein L6-B	RPL6B	RL6B_YEAST 60S ribosomal protein L6-B OS=Saccharomyces cerevisiae (strain ATCC 204508 / S288c) OX=559292 GN=RPL6B PE=1 SV=4	ASLVPGTVLILLAGR;FNVEYFAK;HLEDNTLLVTGPFK;VEDQKVVDK;VSVEGVNVEK;VSVEGVNVEKFNVEYFAK;YVIATSTK	1	1	0	0	0	1	1	0	0	0	31.2	31.8	5.1	4.5	0	2	1	0	0	0	+	5.83113	6.93882	0	7.9405	8	19.986	1.96809	3.34308	20.2558	19.7856	20.4061	20.4791	20.3132	20.4985	16.3202	18.2189	15.8792	16.2179	15.543	15.9443
Color [DarkGray]	1	4	Q12754	Q12754	Ribosomal RNA-processing protein 12	RRP12	RRP12_YEAST Ribosomal RNA-processing protein 12 OS=Saccharomyces cerevisiae (strain ATCC 204508 / S288c) OX=559292 GN=RRP12 PE=1 SV=1	ANAPLIR;GQPKPSTNVDDPLSAVTSGINAYLEAVK;SYILETIDQYLK;VLAESNVSYAEESSSHNVLLLQR	1	0	0	0	0	1	0	0	0	0	1.9	0	0	0	0	1	0	0	0	0	+	4.67983	6.4357	0	4.2614	7	137.51	2.91255	3.26406	20.0216	20.1073	19.9759	18.0031	16.5478	17.6371	17.3164	15.9967	16.9994	16.4353	16.3506	15.9776
Color [DarkGray]	1	4	P25655	P25655	General negative regulator of transcription subunit 1	CDC39	NOT1_YEAST General negative regulator of transcription subunit 1 OS=Saccharomyces cerevisiae (strain ATCC 204508 / S288c) OX=559292 GN=CDC39 PE=1 SV=3	ELPEVFFDPVIDLHSLK;GVISDTDNLLTFVK;LNQPSQSAQPPGVNVPNPQGGIAAVQSDLEQNQR;QIGWEGFDTFLK;RADQPFITQNTNPYSLSLPEPLGLK;SLKPSNFINTPEVIETLSGALGSITLEQQQTEQQR;SQAQVYQSIVEAATLANAPK;STQDLADQLMQAIAIR;TIIFQILTFIAK;VENNDVITTVFIK;VSPSNVDVVLESLEVQTK;VSQAVVNSLFATSESPLCR;YTTSEQDDQSATINR	7	5	7	0	0	7	5	7	0	0	5.7	4.1	6.5	0	0	2	3	6	0	0	+	5.2833	7.55528	0	21.183	38	240.28	2.90944	3.22934	19.9493	20.4631	20.2389	19.6533	20.1066	19.299	16.3852	16.9257	17.6524	16.7964	17.5247	17.8143
Color [DarkGray]	1	4	P25623	P25623	Suppressor of yeast profilin deletion	SYP1	SYP1_YEAST Suppressor of yeast profilin deletion OS=Saccharomyces cerevisiae (strain ATCC 204508 / S288c) OX=559292 GN=SYP1 PE=1 SV=3	LASASSSLTHNDLMNNEFSDSTNNSSLK;SSTEYYNTLDQQVVR;VSSTATSSIYQK	2	0	0	0	0	2	0	0	0	0	3.1	0	0	0	0	2	0	0	0	0	+	4.8626	6.48585	0	5.548	5	96.136	2.56757	3.14679	20.2544	20.1087	19.9836	17.1695	16.0711	17.8215	17.8112	16.1896	16.9055	16.4996	15.8036	16.3983
Color [DarkGray]	1	4	Q07623	Q07623	Nucleolar protein 6	NOP6	NOP6_YEAST Nucleolar protein 6 OS=Saccharomyces cerevisiae (strain ATCC 204508 / S288c) OX=559292 GN=NOP6 PE=1 SV=1	DITAVELQNHFK;GIAFLEFDADKDR	2	0	0	0	0	2	0	0	0	0	11.1	0	0	0	0	1	0	0	0	0	+	5.47255	6.70841	0	14.254	4	25.216	2.84029	3.0941	20.3079	20.4961	20.464	16.686	16.4647	16.7993	17.1283	16.7733	18.0841	16.0368	17.0378	15.9301
Color [DarkGray]	1	4	Q08235	Q08235	Ribosome biogenesis protein BRX1	BRX1	BRX1_YEAST Ribosome biogenesis protein BRX1 OS=Saccharomyces cerevisiae (strain ATCC 204508 / S288c) OX=559292 GN=BRX1 PE=1 SV=2	NKEEYEDGEEDISLVEIGPR	1	1	0	0	0	1	1	0	0	0	6.9	6.9	0	0	0	1	1	0	0	0	+	5.77308	7.00355	0.0019342	2.6994	6	33.531	2.94249	2.99682	20.6105	20.6316	20.6547	20.3675	21.1123	20.4764	18.3112	17.0818	17.5134	15.6171	16.6234	15.5047
Color [DarkGray]	1	4	P48563	P48563	Protein MON2	MON2	MON2_YEAST Protein MON2 OS=Saccharomyces cerevisiae (strain ATCC 204508 / S288c) OX=559292 GN=MON2 PE=1 SV=1	INPELDNLTEIDDLNEYSK;QIGVENLQTLSPLILR;VLQVVPIFFK	2	1	1	0	1	2	1	1	0	1	2.1	1	1	0	1	1	0	0	0	0	+	4.90202	6.83653	0	2.93	5	186.83	2.14008	2.9554	19.7156	19.421	19.4549	18.5267	15.4614	15.5731	15.6446	17.6345	16.4461	18.709	18.4658	18.7378
Color [DarkGray]	1	4	P38911	P38911	FK506-binding nuclear protein	FPR3	FKBP3_YEAST FK506-binding nuclear protein OS=Saccharomyces cerevisiae (strain ATCC 204508 / S288c) OX=559292 GN=FPR3 PE=1 SV=2	DLEEGPTKPK;GWDIGVAGMSVGGER;ITMAALNPEAIDEENKPSTLR;QALPGIPANSELTFDVK;VLEGGIVIEDR	1	4	0	1	2	1	3	0	1	1	2.4	12.9	0	5.1	6.8	0	3	0	1	2	+	6.73535	7.6425	0	5.3701	13	46.553	1.1429	2.95185	19.8182	20.2877	19.9442	22.4343	22.3633	22.5731	16.2805	15.4808	19.4333	20.6761	20.397	20.4607
Color [DarkGray]	1	4	P38922	P38922	Protein HRB1	HRB1	HRB1_YEAST Protein HRB1 OS=Saccharomyces cerevisiae (strain ATCC 204508 / S288c) OX=559292 GN=HRB1 PE=1 SV=2	KFTENVVGGGER;LNNYNYGGCDLDISYAK;SDLYDLFETIGK	2	0	0	0	0	2	0	0	0	0	6.4	0	0	0	0	0	0	0	0	0	+	5.26112	6.60353	0.0082237	1.6136	4	52.141	3.3572	2.9133	19.8917	19.154	19.6567	17.3263	18.9882	17.2704	16.7492	16.8814	16.332	16.4003	15.9132	15.6866
Color [DarkGray]	1	4	Q12499	Q12499	Nucleolar protein 58	NOP58	NOP58_YEAST Nucleolar protein 58 OS=Saccharomyces cerevisiae (strain ATCC 204508 / S288c) OX=559292 GN=NOP58 PE=1 SV=1	AIAPNLTQLVGELVGAR;AIKEYLPELLPGMSDNDLSK;ASETDLSEILPEEIEER;AYVLTETSAGYALLK;CKEWYGWHFPELAK;EQLSNYLSAR;EQLSNYLSARMK;EYLPELLPGMSDNDLSK;FNSAANALEEANSIIEGK;IILTMGIR;IVTDSVAYAR;KSTLIVSETK;KVEMTEAR;MKAIAPNLTQLVGELVGAR;MSLGLAHSIGR;SKASETDLSEILPEEIEER;SPASTIQILGAEK;SSSLIQDLDSSDK;SSSLIQDLDSSDKVLK;SSSLIQDLDSSDKVLKEFK;YDALAEDRDDSGDIGLESR;YGLLYHASLVGQATGK	18	16	11	5	7	18	16	11	5	7	39.3	37.6	32.1	16	18	15	19	9	2	7	+	7.1799	8.84271	0	224.96	153	56.956	3.33434	2.8992	24.2394	23.9762	23.9975	24.269	24.5779	24.3746	21.4953	21.3684	20.6518	22.0606	22.2058	22.0786
Color [DarkGray]	1	4	P15646	P15646	rRNA 2-O-methyltransferase fibrillarin	NOP1	FBRL_YEAST rRNA 2-O-methyltransferase fibrillarin OS=Saccharomyces cerevisiae (strain ATCC 204508 / S288c) OX=559292 GN=NOP1 PE=1 SV=1	ANCIDSTVDAETVFAR;GKEDLLVTK;HAGVYIAR;IKPLEQLTLEPYER;IKPLEQLTLEPYERDHCIVVGR;ISVEEPSKEDGVPPTKVEYR;LAAGIMGGLDELFIAPGK;LAAGIMGGLDELFIAPGKK;MLIGMVDCVFADVAQPDQAR;NMAPGESVYGEKR;VLYLGAASGTSVSHVSDVVGPEGVVYAVEFSHRPGR	7	9	3	1	4	7	9	3	1	4	38.8	36.4	11	2.8	15	8	15	2	1	3	+	7.32591	8.63408	0	55.377	92	34.465	3.22358	2.89751	23.7579	24.2616	24.2361	24.3656	24.3786	24.5631	21.2026	20.7568	21.6037	21.5933	21.1436	21.3824
Color [DarkGray]	1	4	P04456	P04456	60S ribosomal protein L25	RPL25	RL25_YEAST 60S ribosomal protein L25 OS=Saccharomyces cerevisiae (strain ATCC 204508 / S288c) OX=559292 GN=RPL25 PE=1 SV=4	ELYEVDVLK;LTADYDALDIANR;VIEQPITSETAMK	2	1	0	0	2	2	1	0	0	2	15.5	6.3	0	0	15.5	1	0	0	0	0	+	6.23175	6.93072	0.0018692	2.4545	6	15.757	2.88774	2.88418	20.0378	20.1236	20.4138	19.4616	16.2818	19.4254	17.6933	17.5994	16.6299	18.4761	18.7666	16.1137
Color [DarkGray]	1	4	P25644	P25644	DNA topoisomerase 2-associated protein PAT1	PAT1	PAT1_YEAST DNA topoisomerase 2-associated protein PAT1 OS=Saccharomyces cerevisiae (strain ATCC 204508 / S288c) OX=559292 GN=PAT1 PE=1 SV=4	AYLEHSGHR;IIIDEVRDEIFATINEAETLQK;LKDQQAAAGNSSQDNK;YQLSQIVTEDPYNEDFYFQVYK	2	0	1	1	1	2	0	1	1	1	4.8	0	2.8	2	2	1	0	1	0	0	+	4.99171	6.96023	0	8.3342	8	88.51	1.47374	2.80987	19.6788	20.316	20.0776	15.7472	16.5717	16.4749	18.1557	17.9992	15.4879	18.4631	18.5928	18.3328
Color [DarkGray]	1	4	P36534	P36534	54S ribosomal protein L40, mitochondrial	MRPL40	RM40_YEAST 54S ribosomal protein L40, mitochondrial OS=Saccharomyces cerevisiae (strain ATCC 204508 / S288c) OX=559292 GN=MRPL40 PE=1 SV=2	SGSYQHLSNVGSR;TNSFILDENGPTK	1	2	0	0	0	1	2	0	0	0	4.4	8.8	0	0	0	1	2	0	0	0	+	5.63646	6.81255	0	6.5532	7	33.751	3.48075	2.79207	19.702	20.0516	19.9641	20.1749	19.8455	20.4352	17.29	16.6771	17.3745	15.2476	16.5922	16.5769
Color [DarkGray]	1	4	P31384	P31384	Glucose-repressible alcohol dehydrogenase transcriptional effector	CCR4	CCR4_YEAST Glucose-repressible alcohol dehydrogenase transcriptional effector OS=Saccharomyces cerevisiae (strain ATCC 204508 / S288c) OX=559292 GN=CCR4 PE=1 SV=2	HGYTGIFHAK;LSQYSIDEDDDIENR;TFEEYWVPLLDK	1	0	1	0	0	1	0	1	0	0	1.8	0	1.8	0	0	1	0	1	0	0	+	5.19518	6.72665	0	8.3517	13	94.669	1.78946	2.7541	20.5423	19.2167	19.3773	16.9138	15.6038	15.9604	16.7297	18.0024	16.1418	18.532	16.55	17.8153
Color [DarkGray]	1	4	P38323	P38323	Mitochondrial clpX-like chaperone MCX1	MCX1	CLPX_YEAST ATP-dependent clpX-like chaperone, mitochondrial OS=Saccharomyces cerevisiae (strain ATCC 204508 / S288c) OX=559292 GN=MCX1 PE=1 SV=1	DVSGEGVQQSLLK;EVDEDLELSK;FLDEYIVGQEIGKK;IIEGHKVEITVK;NALLDQYEYIFK;VCALDLTTPTDLVSFGLIPELIGR;VPIITALQPLQR	1	0	4	0	0	1	0	4	0	0	2.3	0	11.3	0	0	0	0	4	0	0	+	5.92966	7.443	0	15.027	15	57.945	1.32984	2.70195	20.0695	20.8839	20.6964	15.8087	16.4802	19.5728	17.0412	19.6804	16.8223	16.9596	16.8797	18.8978
Color [DarkGray]	1	4	P36517	P36517	54S ribosomal protein L4, mitochondrial	MRPL4	RM04_YEAST 54S ribosomal protein L4, mitochondrial OS=Saccharomyces cerevisiae (strain ATCC 204508 / S288c) OX=559292 GN=MRPL4 PE=1 SV=2	NIVGSTHDEFSELSNSIR	0	1	0	0	0	0	1	0	0	0	0	5.6	0	0	0	0	0	0	0	0	+	5.54513	6.77558	0.0034843	1.9829	4	36.964	1.11854	2.65411	17.59	20.102	19.9553	20.2246	19.809	20.0188	15.0576	17.0878	17.5396	16.3695	15.1518	15.13
Color [DarkGray]	1	4	P38754;P36105	P38754;P36105	60S ribosomal protein L14-B;60S ribosomal protein L14-A	RPL14B;RPL14A	RL14B_YEAST 60S ribosomal protein L14-B OS=Saccharomyces cerevisiae (strain ATCC 204508 / S288c) OX=559292 GN=RPL14B PE=1 SV=1;RL14A_YEAST 60S ribosomal protein L14-A OS=Saccharomyces cerevisiae (strain ATCC 204508 / S288c) OX=559292 GN=RPL14A PE=1 SV=1	LAAIVEIIDQKK;QAINLGQVVLTPLTFALPR;WAAAGVCEK	3	2	1	1	1	3	2	1	1	1	29	20.3	13.8	13.8	13.8	2	2	0	0	1	+	6.232	7.1351	0	3.9448	11	15.153	2.22492	2.63499	20.1239	20.5036	20.2241	19.8068	20.5216	19.9405	18.1406	18.119	16.687	18.533	18.8985	18.4977
Color [DarkGray]	1	4	P38817	P38817	ADP-ribosylation factor-binding protein GGA2	GGA2	GGA2_YEAST ADP-ribosylation factor-binding protein GGA2 OS=Saccharomyces cerevisiae (strain ATCC 204508 / S288c) OX=559292 GN=GGA2 PE=1 SV=1	DGISQEGTIENAPANPSK;IIEEEQEDDALVQDLLK;IMAGFKEDNAVQAK;KEFLNELVK;TASEIQKEQEIAQAAK	2	0	2	2	1	2	0	2	2	1	6	0	5.3	5.6	2.9	2	0	1	0	0	+	6.18896	7.75242	0	137.86	21	64.346	1.21714	2.62782	21.3855	21.6682	21.4587	16.2867	15.3622	15.3346	19.5741	20.1707	16.8841	19.964	19.5422	19.9546
Color [DarkGray]	1	4	P32481	P32481	Eukaryotic translation initiation factor 2 subunit gamma	GCD11	IF2G_YEAST Eukaryotic translation initiation factor 2 subunit gamma OS=Saccharomyces cerevisiae (strain ATCC 204508 / S288c) OX=559292 GN=GCD11 PE=1 SV=1	GTIADGAPIVPISAQLK;LGDEIEIRPGIVTK;LNPLSAEIINR;LQLTSPACTEINEK;YNIDAVNEFIVK	2	5	3	1	1	2	5	3	1	1	4.4	12.9	8	2.1	2.1	0	2	0	0	0	+	5.83138	7.44386	0	4.4075	8	57.865	1.61643	2.58655	19.7242	20.4527	20.5859	20.465	20.2564	19.7883	19.0145	17.177	16.8117	19.1997	19.3109	19.8909
Color [DarkGray]	1	4	Q01217	Q01217	Protein ARG5,6, mitochondrial;N-acetyl-gamma-glutamyl-phosphate reductase;Acetylglutamate kinase	ARG5,6	ARG56_YEAST Protein ARG5,6, mitochondrial OS=Saccharomyces cerevisiae (strain ATCC 204508 / S288c) OX=559292 GN=ARG5,6 PE=1 SV=1	SVTKEPIEASIK;YFTSVSQQQFAVIK;YLENSDFVSYADEPLEAVAIVK	0	1	3	0	1	0	1	3	0	1	0	1.6	5.6	0	2.5	0	0	2	0	0	+	5.3477	7.0379	0.0034602	1.9609	3	94.868	1.93838	2.55923	18.4789	18.6874	19.8858	18.9068	18.9386	18.7788	15.7509	17.0459	16.5775	18.7999	18.9147	14.9511
Color [DarkGray]	1	4	P39730	P39730	Eukaryotic translation initiation factor 5B	FUN12	IF2P_YEAST Eukaryotic translation initiation factor 5B OS=Saccharomyces cerevisiae (strain ATCC 204508 / S288c) OX=559292 GN=FUN12 PE=1 SV=2	KAPFVVALNK;SKGESDKPSASAK;VDKEAEQYAEQEGIK	0	2	0	0	1	0	2	0	0	1	0	2.3	0	0	1.3	0	2	0	0	0	+	4.73159	6.87147	0	13.833	9	112.27	1.09789	2.55629	16.9023	20.2525	19.4291	19.3391	18.0182	18.6854	16.141	17.1136	15.6604	16.9259	17.1346	17.3863
Color [DarkGray]	1	4	Q3E792;P0C0T4	Q3E792;P0C0T4	40S ribosomal protein S25-A;40S ribosomal protein S25-B	RPS25A;RPS25B	RS25A_YEAST 40S ribosomal protein S25-A OS=Saccharomyces cerevisiae (strain ATCC 204508 / S288c) OX=559292 GN=RPS25A PE=1 SV=1;RS25B_YEAST 40S ribosomal protein S25-B OS=Saccharomyces cerevisiae (strain ATCC 204508 / S288c) OX=559292 GN=RPS25B PE=1 SV=1	AQHAVILDQEKYDR;EGIIKPISK;HLEKEGIIKPISK	2	2	0	0	2	2	2	0	0	2	21.3	21.3	0	0	21.3	1	3	0	0	0	+	6.80686	7.72283	0	12.428	15	12.039	0.742719	2.49205	21.2843	21.4322	21.4398	22.1635	22.021	22.1011	15.8208	20.2788	20.5806	20.4924	20.3553	20.114
Color [DarkGray]	1	4	P36775	P36775	Lon protease homolog, mitochondrial	PIM1	LONM_YEAST Lon protease homolog, mitochondrial OS=Saccharomyces cerevisiae (strain ATCC 204508 / S288c) OX=559292 GN=PIM1 PE=1 SV=2	DGPSAGVTMATSFLSLALNK;ESVSSEEKAENNAK;FSVGGMTDVAEIK;KLSIEDSPTSSADSKPK;NSEEDTDVITDKNDVYDVGVLAQITSAFPSKDEK;NYNVSLVNVLNLEDEPFDR;RVEATEEESEELDDIQEGEDINPTEFLK	1	0	5	0	3	1	0	5	0	3	3	0	10.1	0	7.2	0	0	6	0	0	+	4.88076	7.27093	0	58.967	19	127.11	1.51585	2.46302	19.9376	18.1079	18.5962	15.4574	17.1222	17.107	15.6006	17.3674	16.2847	19.0851	19.3029	18.7263
Color [DarkGray]	1	4	Q08412	Q08412	Ubiquitin-binding protein CUE5	CUE5	CUE5_YEAST Ubiquitin-binding protein CUE5 OS=Saccharomyces cerevisiae (strain ATCC 204508 / S288c) OX=559292 GN=CUE5 PE=1 SV=1	AVIIASQGVLSPAFNALLFLSDPESGKDIELPTQPVR;QTQLEQDELLAR	1	0	2	1	1	1	0	2	1	1	2.9	0	11.9	2.9	2.9	1	0	2	1	1	+	5.5632	6.95083	0	31.623	9	46.869	1.04568	2.46045	20.0217	20.7491	20.2954	16.7324	16.2327	16.3835	15.741	18.7462	19.1976	19.0845	18.7694	18.6245
Color [DarkGray]	1	4	Q08208	Q08208	Nucleolar protein 12	NOP12	NOP12_YEAST Nucleolar protein 12 OS=Saccharomyces cerevisiae (strain ATCC 204508 / S288c) OX=559292 GN=NOP12 PE=1 SV=1	HFEPCGDIEYVR;KGTTIGTGLDR;SISFDEALPR;SSAIDNLFGNIDEK	3	0	0	0	0	3	0	0	0	0	7.8	0	0	0	0	0	0	0	0	0	+	5.25943	6.69079	0	4.4328	6	51.941	1.89747	2.43473	19.5986	19.6401	19.5799	18.2032	17.5459	16.676	16.1258	18.0705	17.3181	16.7057	16.1663	16.6082
Color [DarkGray]	1	4	Q12460	Q12460	Nucleolar protein 56	NOP56	NOP56_YEAST Nucleolar protein 56 OS=Saccharomyces cerevisiae (strain ATCC 204508 / S288c) OX=559292 GN=NOP56 PE=1 SV=1	AILDLNLPK;APIEYLLFEEPTGYAVFK;AQLGLGHAYSR;ASLNDDSLHDLAALLNEDSGIAQR;DKASLNDDSLHDLAALLNEDSGIAQR;DKPAAEVEETKEK;EEFPYVDCISNELAQDLIR;EVQEQINDFGAFTK;GAAEALENANDISEGLVSESLK;GLQSGDLER;IDNYSEEPSNVFGSVLK;IDNYSEEPSNVFGSVLKK;ISMGQDISETDMENVCVFAQR;LEFYNTGKPTLK;LIELVSFAPFK;LISHAGSLTNLSK;LKEVQEQINDFGAFTK;LQQDDIGSR;MHTVAPNLSELIGEVIGAR;NELAIQEAMELYNK;QAASTVQILGAEK;VASLADYRR;VKLQQDDIGSR;YGLIYHSGFISK	20	22	9	9	14	20	22	9	9	14	48.8	51.4	26	25.8	37.9	19	20	10	4	10	+	7.1784	8.87965	0	169.58	199	56.863	5.44802	2.36775	23.3343	23.2704	23.3909	23.4568	23.5427	23.5166	20.9261	21.0741	20.8921	21.5131	21.5623	21.5899
Color [DarkGray]	1	4	P32797	P32797	Cell division control protein 13	CDC13	CDC13_YEAST Cell division control protein 13 OS=Saccharomyces cerevisiae (strain ATCC 204508 / S288c) OX=559292 GN=CDC13 PE=1 SV=2	FTDISSLLDSSAR;NDIVQNYLYDR	1	2	0	0	0	1	2	0	0	0	1.2	2.6	0	0	0	0	2	0	0	0	+	4.93045	6.64645	0.0036298	2.2553	5	104.9	2.14835	2.36079	18.9052	17.691	17.4307	19.6149	19.0064	19.8864	15.4486	15.7518	15.7441	17.3408	17.6591	16.5631
Color [DarkGray]	1	4	Q12452	Q12452	3-keto-steroid reductase	ERG27	ERG27_YEAST 3-keto-steroid reductase OS=Saccharomyces cerevisiae (strain ATCC 204508 / S288c) OX=559292 GN=ERG27 PE=1 SV=1	TQEIDPTGMSDVFAYIQK;YLSLNDIELLK	2	1	2	0	1	2	1	2	0	1	8.4	3.2	8.4	0	3.2	0	0	3	0	0	+	5.83831	7.16053	0	3.2119	11	39.724	0.945607	2.35276	19.5917	20.5105	19.2505	18.8147	19.6231	16.3092	15.2446	18.7562	18.2936	18.5107	16.0302	15.1127
Color [DarkGray]	1	4	Q02326	Q02326	60S ribosomal protein L6-A	RPL6A	RL6A_YEAST 60S ribosomal protein L6-A OS=Saccharomyces cerevisiae (strain ATCC 204508 / S288c) OX=559292 GN=RPL6A PE=1 SV=2	ASLVPGTVLILLAGR;EANLFPEQQNK;FNVEYFAK;HLEDNTLLISGPFK;KEANLFPEQQNK;VEDQKVVDK;VSVEGVNVEK;VSVEGVNVEKFNVEYFAK;WYPSEDVAALKK;YVIATSTK	8	8	1	1	0	3	3	0	0	0	44.3	44.9	5.1	4.5	0	5	7	0	0	0	+	7.29524	8.35328	0	23.334	38	19.961	2.56407	2.34428	24.0204	22.8421	23.728	24.0422	23.443	23.1964	21.1366	21.2168	21.2041	15.5958	15.5032	20.8455
Color [DarkGray]	1	4	P39518	P39518	Long-chain-fatty-acid--CoA ligase 2	FAA2	LCF2_YEAST Long-chain-fatty-acid--CoA ligase 2 OS=Saccharomyces cerevisiae (strain ATCC 204508 / S288c) OX=559292 GN=FAA2 PE=1 SV=1	AVDQDGWFSTGDVAFIDGK;CTDGLQGFEK;EVLVENLNR;FVNTLVCMDELTHDELR;ITFFSLEQVEQVGCFNK;LAHGEYIAPEK;NIASGIAFAFSTFR;NQQLYDMCFLPLAHIFER;QAVAISNPDNEAGFSSIYR;SALDIGIR;SNMYHVLKMVPDMK;TAYDHFMFSAR	5	8	4	2	7	5	8	4	2	7	10.1	14.8	6.9	2.3	13.3	1	6	3	0	6	+	6.17589	7.87602	0	51.77	52	83.437	2.41824	2.32629	21.3715	21.2733	21.3671	21.251	20.7929	21.013	18.2418	19.3925	19.3987	20.2738	19.8827	20.5132
Color [DarkGray]	1	4	P41805	P41805	60S ribosomal protein L10	RPL10	RL10_YEAST 60S ribosomal protein L10 OS=Saccharomyces cerevisiae (strain ATCC 204508 / S288c) OX=559292 GN=RPL10 PE=1 SV=1	EAGEVKDDGAFVK;VDIGQIIFSVR;WGFTNLDRPEYLK	2	2	1	1	2	2	2	1	1	2	10.9	10.9	5	5	10.9	2	2	1	1	1	+	6.51424	7.64049	0	17.015	22	25.361	3.17666	2.28521	21.6021	21.6391	21.6043	21.2894	21.2919	21.2455	19.6636	19.4583	18.868	19.4803	19.4105	19.0158
Color [DarkGray]	1	4	P42943	P42943	T-complex protein 1 subunit eta	CCT7	TCPH_YEAST T-complex protein 1 subunit eta OS=Saccharomyces cerevisiae (strain ATCC 204508 / S288c) OX=559292 GN=CCT7 PE=1 SV=1	AQDAEVGDGTTSVTILAGELMK;INALNSATEATNLILSVDETITNK;LIHNNADFFVK;LPIGDLATQFFADR;QVEETGANIVLSK	1	0	4	0	1	1	0	4	0	1	2.5	0	13.3	0	2.5	1	0	3	0	1	+	5.7541	7.29818	0	9.539	17	59.735	2.30471	2.26201	18.7248	19.3371	19.7148	17.2061	16.6915	15.4723	16.9115	17.5218	16.5573	17.7113	17.0906	18.0671
Color [DarkGray]	1	4	P24384	P24384	Pre-mRNA-splicing factor ATP-dependent RNA helicase PRP22	PRP22	PRP22_YEAST Pre-mRNA-splicing factor ATP-dependent RNA helicase PRP22 OS=Saccharomyces cerevisiae (strain ATCC 204508 / S288c) OX=559292 GN=PRP22 PE=1 SV=1	SGNLQEFIRNIQK	1	0	0	0	1	1	0	0	0	1	1.1	0	0	0	1.1	0	0	0	0	0	+	4.64773	6.48659	0	3.4086	2	130.01	2.51257	2.25891	19.635	19.8799	19.3838	16.633	17.8899	15.7652	17.2139	16.9122	17.996	19.5135	16.3093	15.5543
Color [DarkGray]	1	4	P32610	P32610	V-type proton ATPase subunit D	VMA8	VATD_YEAST V-type proton ATPase subunit D OS=Saccharomyces cerevisiae (strain ATCC 204508 / S288c) OX=559292 GN=VMA8 PE=1 SV=1	QENVSGVYLSQFESYIDPEINDFR;RVNAIEHVIIPR;TENTIAYINSELDELDREEFYR;VNAIEHVIIPR	1	1	2	0	2	1	1	2	0	2	4.3	4.3	12.9	0	4.7	1	0	3	0	2		5.17673	7.70649	0	7.9388	23	29.194	0.631443	2.23748	16.1623	21.3096	20.4124	20.4509	19.911	16.6735	17.2283	16.7226	17.2211	20.5343	16.0018	19.9897
Color [DarkGray]	1	4	P04819	P04819	DNA ligase 1	CDC9	DNLI1_YEAST DNA ligase 1 OS=Saccharomyces cerevisiae (strain ATCC 204508 / S288c) OX=559292 GN=CDC9 PE=1 SV=2	IGTGFSDEMLQLLHDR;LTPTIIDGPK;TQGKDSQLKK	2	2	1	1	0	2	2	1	1	0	3.4	3.4	2.1	2.1	0	1	0	0	0	0	+	4.85648	7.01561	0	4.1571	6	84.827	2.731	2.22876	20.6907	20.5308	20.7702	19.0844	19.6757	15.0621	18.8713	17.8693	18.5649	16.3788	17.2719	15.9203
Color [DarkGray]	1	4	P32793	P32793	Protein YSC84	YSC84	YSC84_YEAST Protein YSC84 OS=Saccharomyces cerevisiae (strain ATCC 204508 / S288c) OX=559292 GN=YSC84 PE=1 SV=2	AGFLFSGR;AGSGVIVAR;GYSLGHGPTHPSNMSNVDDLSHK;KGDVITILK;KSDSQNDWWTGR;SAEAAASASTGGVSAVFAYSK;SDSQNDWWTGR;SFVKPNQVFGADQVIPPYVLK;SRYDDDYDDDGYGR;TGLGNESTATNSATPTAVALYNFAGEQPGDLAFK	2	3	3	1	4	2	3	3	1	4	17.5	23.1	18.8	11.1	29.3	0	2	4	0	2		5.52204	7.66348	0	30.861	33	50.901	0.671343	2.22194	20.3451	20.1673	20.9284	20.1442	18.9297	19.068	19.3532	15.3213	20.1005	19.6628	20.4087	19.8167
Color [DarkGray]	1	4	P36519	P36519	54S ribosomal protein L7, mitochondrial	MRPL7	RM07_YEAST 54S ribosomal protein L7, mitochondrial OS=Saccharomyces cerevisiae (strain ATCC 204508 / S288c) OX=559292 GN=MRPL7 PE=1 SV=2	TLLSGFQFPFFGEEK	1	1	0	0	0	1	1	0	0	0	5.1	5.1	0	0	0	0	0	0	0	0	+	4.89998	6.15524	0.0082372	1.6296	1	33.099	1.57225	2.14747	18.5599	18.4406	19.1537	18.2436	16.1869	16.1651	15.5029	17.5309	16.6779	16.6518	15.8496	15.8309
Color [DarkGray]	1	4	P05759;P0CH09;P0CH08;P0CG63	P05759;P0CH09;P0CH08;P0CG63	Ubiquitin-40S ribosomal protein S31;Ubiquitin;40S ribosomal protein S31;Ubiquitin-60S ribosomal protein L40;Ubiquitin;60S ribosomal protein L40;Polyubiquitin;Ubiquitin	RPS31;RPL40B;RPL40A;UBI4	RS31_YEAST Ubiquitin-40S ribosomal protein S31 OS=Saccharomyces cerevisiae (strain ATCC 204508 / S288c) OX=559292 GN=RPS31 PE=1 SV=3;RL40B_YEAST Ubiquitin-60S ribosomal protein L40 OS=Saccharomyces cerevisiae (strain ATCC 204508 / S288c) OX=559292 GN=RPL40	ECSNPTCGAGVFLANHK;ECSNPTCGAGVFLANHKDR;ESTLHLVLR;TITLEVESSDTIDNVK;TLSDYNIQK	2	5	3	2	3	2	5	3	2	3	16.4	34.9	22.4	16.4	22.4	3	5	3	1	2	+	7.59192	8.39372	0	71.458	45	17.216	4.715	2.11357	23.1131	22.8673	22.9539	23.4747	23.4004	23.5786	20.8055	20.8164	20.9716	20.912	21.1806	21.1148
Color [DarkGray]	1	4	P18900	P18900	Hexaprenyl pyrophosphate synthase, mitochondrial	COQ1	COQ1_YEAST Hexaprenyl pyrophosphate synthase, mitochondrial OS=Saccharomyces cerevisiae (strain ATCC 204508 / S288c) OX=559292 GN=COQ1 PE=1 SV=1	ILWNNPISLVSK;MAVLAGDFLLGR;SALEFLTNSILTR	1	1	1	1	0	1	1	1	1	0	2.7	2.7	2.7	2.7	0	1	1	0	0	0	+	5.30105	6.79242	0	8.8601	6	52.559	1.99062	2.10392	19.3112	19.7979	18.9651	16.0635	17.8858	18.8486	18.0284	16.9655	16.7687	16.2398	18.4862	15.8486
Color [DarkGray]	1	4	Q07938	Q07938	S-methyl-5-thioadenosine phosphorylase	MEU1	MTAP_YEAST S-methyl-5-thioadenosine phosphorylase OS=Saccharomyces cerevisiae (strain ATCC 204508 / S288c) OX=559292 GN=MEU1 PE=1 SV=1	DFVLPQQIIDR;EIPEFMHTGDGLR;HSSYFNDEGLVGHVGFGQPFSQK	0	0	3	0	0	0	0	3	0	0	0	0	13.9	0	0	0	0	2	0	0		5.51593	7.30486	0	4.9453	11	37.856	0.578775	2.09463	15.5195	19.843	20.3562	15.4385	16.2843	15.8681	17.0846	16.8581	15.4921	16.2528	15.9483	16.149
Color [DarkGray]	1	4	P32912	P32912	Vacuolar morphogenesis protein 7	VAM7	VAM7_YEAST Vacuolar morphogenesis protein 7 OS=Saccharomyces cerevisiae (strain ATCC 204508 / S288c) OX=559292 GN=VAM7 PE=1 SV=1	MAANSVGKMSEK;MAANSVGKMSEKLR	1	1	1	0	1	1	1	1	0	1	3.8	3.8	3.8	0	4.4	0	0	1	0	1		5.81279	7.01691	0.009375	1.4225	7	36.711	0.760669	2.08144	19.2547	19.557	15.7155	20.2229	19.8601	19.7488	16.5972	15.8462	15.8394	17.7319	16.5786	17.7735
Color [DarkGray]	1	4	P38620;P38063	P38620;P38063	Ribose-phosphate pyrophosphokinase 2;Ribose-phosphate pyrophosphokinase 4	PRS2;PRS4	KPR2_YEAST Ribose-phosphate pyrophosphokinase 2 OS=Saccharomyces cerevisiae (strain ATCC 204508 / S288c) OX=559292 GN=PRS2 PE=1 SV=1;KPR4_YEAST Ribose-phosphate pyrophosphokinase 4 OS=Saccharomyces cerevisiae (strain ATCC 204508 / S288c) OX=559292 GN=PRS4	EVIAIVTHGIFSGSAR;VGVYQYSNK	1	0	2	1	0	1	0	2	1	0	2.8	0	7.9	2.8	0	1	0	2	1	0		5.82421	7.12011	0	4.2893	12	34.765	0.630188	2.0568	19.8847	17.7308	21.0375	16.6188	18.8187	15.2844	15.9035	19.6191	16.96	15.939	19.3974	15.5482
Color [DarkGray]	1	4	P39531	P39531	Recyclin-1	RCY1	RCY1_YEAST Recyclin-1 OS=Saccharomyces cerevisiae (strain ATCC 204508 / S288c) OX=559292 GN=RCY1 PE=1 SV=4	ESELNYQSNNLAAVAR;FNGIFTQEEIYEFVQR;ILLISNEESNAIEFFK;IYNTLKDQTDASSASNNELPNDLSIITETSK;NFETSIDDFVAEGLNIGINK;YNPNEIEQIEIK	1	1	3	0	0	1	1	3	0	0	1.9	1.9	5.7	0	0	1	0	3	0	0	+	5.2652	7.01678	0	30.074	16	97.47	1.10837	2.05574	18.8304	18.8198	17.6725	18.5806	17.2347	16.7691	17.2005	17.1353	14.8196	16.9727	16.8929	15.7866
Color [DarkGray]	1	4	Q02204	Q02204	54S ribosomal protein L13, mitochondrial	MRPL13	RM13_YEAST 54S ribosomal protein L13, mitochondrial OS=Saccharomyces cerevisiae (strain ATCC 204508 / S288c) OX=559292 GN=MRPL13 PE=1 SV=2	DKITSDNQLDDMILQATEK;EAEPNAIHPFSDNYASPNIYVVNDVTSK;SGYLIPDYELTTLSTPLQFK	0	1	0	0	0	0	1	0	0	0	0	7.6	0	0	0	0	1	0	0	0	+	5.35374	6.79107	0	6.1831	7	30.271	0.851159	2.04813	16.0727	19.5734	18.8051	19.1578	19.7472	18.9814	15.4236	16.5776	16.3056	15.5014	15.4079	17.1379
Color [DarkGray]	1	4	Q12063	Q12063	Dehydrodolichyl diphosphate syntase complex subunit NUS1	NUS1	UPPS_YEAST Dehydrodolichyl diphosphate synthase complex subunit NUS1 OS=Saccharomyces cerevisiae (strain ATCC 204508 / S288c) OX=559292 GN=NUS1 PE=1 SV=1	IFYNLDGIETETDVGNEIEANQEKDK;YFGPAHVPNYAVK	1	1	1	1	1	1	1	1	1	1	3.5	3.5	3.5	3.5	3.5	0	0	0	0	0	+	5.60618	6.9284	0	5.5552	8	42.557	1.98995	1.95349	19.4467	20.3346	20.0368	19.041	19.506	16.8129	18.2788	17.3115	18.3675	18.7155	16.3385	18.4109
Color [DarkGray]	1	4	P25339	P25339	Pumilio homology domain family member 4	PUF4	PUF4_YEAST Pumilio homology domain family member 4 OS=Saccharomyces cerevisiae (strain ATCC 204508 / S288c) OX=559292 GN=PUF4 PE=1 SV=2	AADAIFEETKDYTVELMTDSFGNYLIQK;AIELSIHK;AKKPSVGANNTAK;FADAVLDQYIGSIHSLCK;VLPIASADPLWTHSNVPGSASVAIEETTATLQESLPSK	2	0	4	0	2	2	0	4	0	2	2.4	0	9.8	0	2.4	0	0	6	0	1	+	5.4868	7.27351	0	17.247	16	97.797	1.18817	1.95119	19.7269	19.1683	19.7453	16.5694	16.329	14.968	16.1118	18.508	18.167	18.2906	18.0799	18.3352
Color [DarkGray]	1	4	P33892	P33892	Translational activator GCN1	GCN1	GCN1_YEAST eIF-2-alpha kinase activator GCN1 OS=Saccharomyces cerevisiae (strain ATCC 204508 / S288c) OX=559292 GN=GCN1 PE=1 SV=1	ASALGSLAEVAGSALYKR;DAAEPFKIGDENINLLINELSK;EAAALSFDVFQDVVGK;EAGVELITLHGSQNSK;EIADFIWEFNK;GYGISALSEFDIIR;HLQQSDAR;IHAVNLLQELFYK;ILIEIPLTHYEVSEK;ISIVEVLLSLLSLPSK;KPEFIGFSVIDAIER;KSDVIFPILIPTLLAPPIDAFR;LGEEQFPDLIPR;LIGSLSEILSNDEAHK;LLDTLSDESK;SDVIFPILIPTLLAPPIDAFR;SLFPLFNQDDSGLR;SLSDATNETLR;STILETLDNEFELEPFMK;TAILNWEDISPVLEK;TIEADLTADDFSR;VDPLVIELVTGAK	8	7	15	4	9	8	7	15	4	9	4.5	3.5	7.3	2.3	5	3	3	13	1	3	+	5.56345	7.95594	0	38.86	82	296.69	2.56886	1.94824	20.5098	20.5506	20.544	19.077	20.2955	19.2865	19.0841	18.6091	18.0664	20.0568	20.6813	19.7367
Color [DarkGray]	1	4	P16474	P16474	78 kDa glucose-regulated protein homolog	KAR2	BIP_YEAST Endoplasmic reticulum chaperone BiP OS=Saccharomyces cerevisiae (strain ATCC 204508 / S288c) OX=559292 GN=KAR2 PE=1 SV=1	AKFEELNLDLFKK;DAGTIAGLNVLR;DVDDIVLVGGSTR;IEIDSFVDGIDLSETLTR;ITPSYVAFTDDERLIGDAAK;IVNEPTAAAIAYGLDK;KVFTPEEISGMILGK;NKLENYAHSLK;NQVAANPQNTIFDIK;NQVAANPQNTIFDIKR;QIAEDYLGTK;SQIFSTAVDNQPTVMIK;VFTPEEISGMILGK;VTHAVVTVPAYFNDAQR	4	8	9	1	1	4	8	9	1	1	10.6	17.7	18	3.7	4.7	2	6	8	0	0	+	6.11368	8.03113	0	62.071	53	74.467	1.99244	1.92069	18.9175	18.71	19.4695	20.6356	21.3582	21.0863	17.8171	16.767	16.7509	17.3133	17.1676	17.4897
Color [DarkGray]	1	4	P53829	P53829	Protein CAF40	CAF40	CAF40_YEAST Protein CAF40 OS=Saccharomyces cerevisiae (strain ATCC 204508 / S288c) OX=559292 GN=CAF40 PE=1 SV=1	NDSQDVITFLLR	1	1	1	0	1	1	1	1	0	1	3.2	3.2	3.2	0	3.2	1	1	1	0	1	+	5.52463	6.72874	0	4.4143	11	41.155	1.67852	1.88292	19.2912	18.8683	18.8237	18.5296	16.5357	18.9828	17.3339	17.8226	16.178	17.7481	16.3873	16.6379
Color [DarkGray]	1	4	P40471	P40471	NADPH-dependent 1-acyldihydroxyacetone phosphate reductase	AYR1	AYR1_YEAST NADPH-dependent 1-acyldihydroxyacetone phosphate reductase OS=Saccharomyces cerevisiae (strain ATCC 204508 / S288c) OX=559292 GN=AYR1 PE=1 SV=1	DILSTSDPVDVYR;FVMIFVPYWLLEK;LDISKPEEIVTFSGFLR;VINAITGGVATDIADKRPLPETSIYNFPEGR	3	1	4	1	1	3	1	4	1	1	20.5	4.4	24.9	4.4	4.4	2	1	4	1	1		6.09712	7.62341	0	28.856	20	32.814	0.697451	1.8677	20.9792	20.6407	20.7324	19.7049	19.8146	19.6228	20.2992	19.9583	16.4917	20.0332	19.6882	19.9094
Color [DarkGray]	1	4	Q01590	Q01590	Integral membrane protein SED5	SED5	SED5_YEAST Integral membrane protein SED5 OS=Saccharomyces cerevisiae (strain ATCC 204508 / S288c) OX=559292 GN=SED5 PE=1 SV=1	IDANVDDIDLNISGAQR	0	0	1	0	1	0	0	1	0	1	0	0	5	0	5	0	0	2	0	0	+	5.62474	6.70391	0.0036697	2.3002	5	38.807	2.08931	1.86721	17.4583	18.4583	18.6691	17.6786	15.7715	17.6755	16.3364	16.1817	16.4659	18.0603	16.653	15.3873
Color [DarkGray]	1	4	Q01939	Q01939	26S protease regulatory subunit 8 homolog	RPT6	PRS8_YEAST 26S proteasome regulatory subunit 8 homolog OS=Saccharomyces cerevisiae (strain ATCC 204508 / S288c) OX=559292 GN=RPT6 PE=1 SV=4	EHAPSIIFMDEIDSIGSTR;GVCTEAGMYALRERR;LDILDPALLRPGR;VSGAELVQK	1	2	3	1	1	1	2	3	1	1	2.2	5.9	10.1	2.2	2.2	1	0	3	1	1		5.35725	7.37902	0	5.8903	17	45.271	0.519654	1.8169	20.2832	20.5084	17.6169	20.1739	16.4495	20.1987	15.7574	17.2613	19.9392	20.2307	14.9736	20.2948
Color [DarkGray]	1	4	P32340	P32340	Rotenone-insensitive NADH-ubiquinone oxidoreductase, mitochondrial	NDI1	NDI1_YEAST Rotenone-insensitive NADH-ubiquinone oxidoreductase, mitochondrial OS=Saccharomyces cerevisiae (strain ATCC 204508 / S288c) OX=559292 GN=NDI1 PE=1 SV=1	GLAVNDFLQVK;GSNNIFAIGDNAFAGLPPTAQVAHQEAEYLAK;KIPEQNSSKR;LSSYAQSHLENTSIK;SIIEPIVNFALK;TKHEDGKITEETIPYGTLIWATGNK;YNDLGALAYLGSER	5	1	4	3	3	5	1	4	3	3	18.5	2.7	13.3	10.5	6.8	4	1	5	1	2	+	5.56587	7.61272	0	29.859	38	57.249	2.82722	1.78582	20.7407	21.1092	20.5586	18.0249	16.6041	15.6689	19.0682	18.7115	19.2714	18.8129	18.6738	18.0376
Color [DarkGray]	1	4	P38903	P38903	Serine/threonine-protein phosphatase 2A 56 kDa regulatory subunit delta isoform	RTS1	2A5D_YEAST Serine/threonine-protein phosphatase 2A 56 kDa regulatory subunit delta isoform OS=Saccharomyces cerevisiae (strain ATCC 204508 / S288c) OX=559292 GN=RTS1 PE=1 SV=2	KPASASSSSHGTTHSSASSTGSK;LPNFNEVSPEER;TATTPSSSSSSSR	1	0	1	0	1	1	0	1	0	1	3	0	3	0	3	1	0	1	0	0	+	4.91246	6.38957	0	3.6915	8	85.334	2.2147	1.78581	18.258	18.2593	18.6898	16.3455	16.2221	15.6401	16.057	16.6861	17.1065	17.1277	16.772	16.6713
Color [DarkGray]	1	4	P39079	P39079	T-complex protein 1 subunit zeta	CCT6	TCPZ_YEAST T-complex protein 1 subunit zeta OS=Saccharomyces cerevisiae (strain ATCC 204508 / S288c) OX=559292 GN=CCT6 PE=1 SV=1	AAAAQDEITGDGTTTVVCLVGELLR;FIQEGVHPR;GIDPMSLDVFAK;IITDGFEIAR;NAITGATGIASNLLLCDELLR;NSGFDPLDVLAMVEDELDDAQDSDETR;TKTGIEAFAEALLVIPK	1	0	4	1	2	1	0	4	1	2	1.8	0	15.2	1.8	5.7	0	0	3	0	0	+	5.79386	7.22027	0	11.603	16	59.923	1.43891	1.78503	19.3262	18.7288	19.7291	16.8289	16.0179	18.1941	18.4606	16.8499	17.1184	18.3364	18.1243	18.6057
Color [DarkGray]	1	4	P39743	P39743	Reduced viability upon starvation protein 167	RVS167	RV167_YEAST Reduced viability upon starvation protein 167 OS=Saccharomyces cerevisiae (strain ATCC 204508 / S288c) OX=559292 GN=RVS167 PE=1 SV=1	AIVAELQETLKPDLALVEEK;HLNTYNKHEK;KGNVEEQTDALTITHFK;RFQELEQETK;TPDVNEWWTGRYNGQQGVFPGNYVQLNK	1	2	4	2	3	1	2	4	2	3	3.5	7.9	15.6	7.9	12	1	0	3	0	1	+	5.12372	7.6511	0	7.4544	22	52.774	1.89808	1.76863	20.5824	21.7465	20.4646	19.0779	18.8121	19.2084	19.1229	19.2481	19.1167	20.561	19.4825	19.1307
Color [DarkGray]	1	4	P47122	P47122	GPN-loop GTPase 1	NPA3	GPN1_YEAST GPN-loop GTPase 1 OS=Saccharomyces cerevisiae (strain ATCC 204508 / S288c) OX=559292 GN=NPA3 PE=1 SV=1	SSAAASDNDSIDAISDLEEDANDGLVDRDEDEGVER;TKGEVNENSAPDLQR;TPPYVINLDPAVLR;VPYGANIDIRDSIK	1	2	3	0	1	1	2	3	0	1	3.9	13	16.9	0	9.4	0	1	2	0	0		5.55766	7.42509	0	28.284	8	43.194	0.674123	1.73281	20.7848	20.1994	20.8861	19.8299	16.4401	20.3637	16.6325	20.3722	19.6672	20.0423	19.852	19.9942
Color [DarkGray]	1	4	Q04372	Q04372	Type 2A phosphatase-associated protein 42	TAP42	TAP42_YEAST Type 2A phosphatase-associated protein 42 OS=Saccharomyces cerevisiae (strain ATCC 204508 / S288c) OX=559292 GN=TAP42 PE=1 SV=1	ASVTEQFNDIISLYSTK;GYGQYGPTMSVEEFLDKEFEEGR;RQSNDSDVAQR;SVESFINFLTLLQDYK;VLQGGEEPEQAPDEENMDWQDRETYK;YNPQLSELYAQPK	2	0	3	1	4	2	0	3	1	4	7.7	0	18	4.6	18.3	0	0	3	0	1	+	5.89936	7.40286	0	44.007	14	42.567	1.50059	1.66973	18.7962	19.564	19.2953	16.8316	18.3739	17.7779	16.982	18.4666	17.1977	18.5191	17.6982	17.7174
Color [DarkGray]	1	4	P05030;P19657	P05030;P19657	Plasma membrane ATPase 1;Plasma membrane ATPase 2	PMA1;PMA2	PMA1_YEAST Plasma membrane ATPase 1 OS=Saccharomyces cerevisiae (strain ATCC 204508 / S288c) OX=559292 GN=PMA1 PE=1 SV=2;PMA2_YEAST Plasma membrane ATPase 2 OS=Saccharomyces cerevisiae (strain ATCC 204508 / S288c) OX=559292 GN=PMA2 PE=1 SV=3	ADTGIAVEGATDAAR;GYLVAMTGDGVNDAPSLK;KADTGIAVEGATDAAR;LGLGGGGDMPGSELADFVENADGFAEVFPQHK;SVEDFMAAMQR;TVEEDHPIPEDVHENYENK;VLEFHPFDPVSK;VTAVVESPEGER	1	3	6	0	0	1	3	6	0	0	1.3	4.9	11.8	0	0	0	2	11	0	0	+	5.38653	7.51477	0	22.41	35	99.618	1.74455	1.64672	18.3877	18.3514	18.5227	18.7102	17.8073	18.0099	16.2444	16.4686	17.6087	17.3483	17.5442	15.523
Color [DarkGray]	1	4	Q03921	Q03921	Protein dopey	DOP1	DOP1_YEAST Protein dopey OS=Saccharomyces cerevisiae (strain ATCC 204508 / S288c) OX=559292 GN=DOP1 PE=1 SV=1	LFYILTDNILK;SANEESNVYFTK;SVLDLLLQR;YIAEEGIEPELIAVSLLDIVSK	1	0	3	0	0	1	0	3	0	0	0.5	0	2.5	0	0	1	0	3	0	0	+	4.54734	6.50638	0	3.5544	9	194.69	2.49352	1.63486	18.1263	17.4145	18.0513	16.9533	17.3112	16.1654	16.3571	16.3539	15.9764	17.2798	18.2124	17.5501
Color [DarkGray]	1	4	Q03175	Q03175	Dehydrodolichyl diphosphate syntase complex subunit SRT1	SRT1	SRT1_YEAST Dehydrodolichyl diphosphate synthase complex subunit SRT1 OS=Saccharomyces cerevisiae (strain ATCC 204508 / S288c) OX=559292 GN=SRT1 PE=1 SV=1	EEVDTLMNLFTVK;IVGDQSLLSPEMR	1	1	1	1	0	1	1	1	1	0	3.8	3.8	3.8	3.8	0	0	1	1	0	0	+	5.08458	6.315	0	5.6877	9	40.2	3.34206	1.61844	18.5767	19.0576	18.8276	17.7803	15.0114	18.5854	17.0748	17.2445	17.2873	15.6122	15.5198	15.4997
Color [DarkGray]	1	4	P53316	P53316	Uncharacterized RNA-binding protein YGR250C	YGR250C	YG5B_YEAST Uncharacterized RNA-binding protein YGR250C OS=Saccharomyces cerevisiae (strain ATCC 204508 / S288c) OX=559292 GN=YGR250C PE=1 SV=1	EVIEVIKK;FINALMTQNQSQQQVSR;FQNFQPHNDYHK;GYGFVSFESPLDAAK;LQVLEQNKDIYLYEHGSQEYEK;QQSNDSSSDNDLPVGSSR;SLSIGELSFLFSK;TSTGLQLEQLANTNLLTIR	3	2	5	1	5	3	2	5	1	5	4.5	4	9.3	2.3	9.3	1	2	4	1	4		5.71445	7.59607	0	33.157	32	89.512	0.619069	1.61428	20.1829	20.1552	20.329	20.2746	19.8612	20.2571	16.2692	19.8673	19.6879	20.3484	20.3257	20.1488
Color [DarkGray]	1	4	P38169	P38169	Kynurenine 3-monooxygenase	BNA4	KMO_YEAST Kynurenine 3-monooxygenase OS=Saccharomyces cerevisiae (strain ATCC 204508 / S288c) OX=559292 GN=BNA4 PE=1 SV=1	EGYNVTLYDFR;KVEMDFSQEYMNLR;SESVAIIGAGLVGCLAALAFSK	0	0	3	0	0	0	0	3	0	0	0	0	10.2	0	0	0	0	2	0	0		5.2935	6.70846	0.0066335	1.7149	3	52.429	0.755183	1.60958	16.9393	16.198	19.1724	17.3307	15.5568	16.1575	15.1165	16.5035	15.861	15.6601	15.5681	16.8656
Color [DarkGray]	1	4	Q12265	Q12265	Ribose-phosphate pyrophosphokinase 5	PRS5	KPR5_YEAST Ribose-phosphate pyrophosphokinase 5 OS=Saccharomyces cerevisiae (strain ATCC 204508 / S288c) OX=559292 GN=PRS5 PE=1 SV=1	ATAIADALELSFALIHK;DRVDVIDVSCIIGEAIR;IGQSSIDKLIISNTVPQDR;SLDSAIR;STINLENPQPIR;VYALITHGVFSGDALER	1	0	4	1	2	1	0	4	1	2	3.8	0	13.1	3.8	7.3	0	0	2	0	2		4.95206	7.32722	0	8.8658	15	53.504	0.92166	1.6069	19.1227	19.7509	20.5561	17.0966	19.2162	15.2652	18.902	18.9057	16.8011	19.4318	18.47	18.3643
Color [DarkGray]	1	4	Q08817	Q08817	Leucine-rich repeat-containing protein SOG2	SOG2	SOG2_YEAST Leucine-rich repeat-containing protein SOG2 OS=Saccharomyces cerevisiae (strain ATCC 204508 / S288c) OX=559292 GN=SOG2 PE=1 SV=1	AVAVNVVSLLYSVR;LNVLIPNDSNSEK;LQYLDLHNNNFK;TSTNSSNTIISELATQEK	0	0	3	0	0	0	0	3	0	0	0	0	5.6	0	0	0	0	3	0	0		5.30399	7.13634	0	8.5328	16	87.325	0.579767	1.6012	15.8873	19.6676	18.6675	17.0973	16.8166	16.7888	16.9928	15.5021	16.9239	16.4234	15.5248	16.322
Color [DarkGray]	1	4	P00546	P00546	Cyclin-dependent kinase 1	CDC28	CDK1_YEAST Cyclin-dependent kinase 1 OS=Saccharomyces cerevisiae (strain ATCC 204508 / S288c) OX=559292 GN=CDC28 PE=1 SV=1	GIDLLDKLLAYDPINR;LYDIVHSDAHK	1	0	1	0	1	1	0	1	0	1	5.4	0	5.4	0	5.4	0	0	1	0	1		4.7116	6.68118	0	4.2649	6	34.061	0.727334	1.59739	18.4373	17.0938	18.1672	16.817	18.5719	16.6612	15.2632	18.1326	15.5103	17.9683	17.7085	15.1525
Color [DarkGray]	1	4	Q03559	Q03559	Uncharacterized protein YMR295C	YMR295C	YM8V_YEAST Uncharacterized protein YMR295C OS=Saccharomyces cerevisiae (strain ATCC 204508 / S288c) OX=559292 GN=YMR295C PE=1 SV=1	QSYFSNEEGHVLCDVFGQPITQADISNPTR;SFEYAVSGDPVWAQQLETPTYGFR;TASVADPILDAVQEAQPFEQAADTFHDNMNR	1	1	2	0	0	1	1	2	0	0	15.2	15.2	27.4	0	0	0	1	3	0	0		5.98905	7.13338	0	11.958	8	22.178	1.04543	1.59124	19.1333	19.3437	19.6074	19.0349	19.4309	16.7389	16.8416	17.3231	19.1459	16.9879	19.4792	16.8942
Color [DarkGray]	1	4	Q12451	Q12451	Oxysterol-binding protein homolog 2	OSH2	OSH2_YEAST Oxysterol-binding protein homolog 2 OS=Saccharomyces cerevisiae (strain ATCC 204508 / S288c) OX=559292 GN=OSH2 PE=1 SV=1	SDVISFLLSQK;VAEDLEYSELLDQAATFEDSTLR	1	0	1	0	1	1	0	1	0	1	1.8	0	1.8	0	1.8	0	0	1	0	0	+	4.91527	6.7006	0.0018622	2.4249	4	145.79	1.46801	1.5838	18.2336	18.4866	18.6204	17.1134	15.6604	15.052	16.8787	17.6995	16.011	17.8964	18.0754	16.3341
Color [DarkGray]	1	4	Q12523	Q12523	WD repeat-containing protein YPL247C	YPL247C	YP247_YEAST WD repeat-containing protein YPL247C OS=Saccharomyces cerevisiae (strain ATCC 204508 / S288c) OX=559292 GN=YPL247C PE=1 SV=1	LEPSPYDPNVLATFAADSNK;LQVLHSNDLLSWESVVDADVVYPVSK;SLAHSTIIYEPPSSSVSGATAGTITPSSK;SPMYSPLDFSPPVFSPNHSQLQQAR;STQLFASCGGDGSVR	1	1	3	3	1	1	1	3	3	1	2.9	4.8	12.2	11.5	2.9	1	3	5	4	2		5.94296	7.56602	0	27.998	37	57.323	0.5813	1.57434	20.1269	20.1898	20.769	19.9999	20.3379	20.4004	19.8122	20.1356	16.4149	16.9594	19.8115	16.7553
Color [DarkGray]	1	4	P11484	P11484	Heat shock protein SSB1	SSB1	SSB1_YEAST Ribosome-associated molecular chaperone SSB1 OS=Saccharomyces cerevisiae (strain ATCC 204508 / S288c) OX=559292 GN=SSB1 PE=1 SV=3	ARFEDLNAALFK;AVITVPAYFNDAQR;DAGAISGLNVLR;ENTLLGEFDLK;FDDESVQK;FDDESVQKDMK;FEDLNAALFK;HVLIFDLGGGTFDVSLLHIAGGVYTVK;IEAALSDALAALQIEDPSADELR;IEAALSDALAALQIEDPSADELRK;IINEPTAAAIAYGLGAGK;IINEPTAAAIAYGLGAGKSEK;KKTGLDISDDAR;KTGLDISDDAR;LESYVASIEQTVTDPVLSSK;LLSDFFDGK;LLSDFFDGKQLEK;LSSEEIEKMVNQAEEFK;LSSEEIEKMVNQAEEFKAADEAFAK;MKEIAEAK;MVNQAEEFK;MVNQAEEFKAADEAFAK;NIPMMPAGEPVLEAIFEVDANGILK;NQAALNPR;NTTVPTIK;N…	2	2	2	2	2	2	2	2	2	2	67.7	69.2	73.4	67.7	71.5	2	4	7	2	2	+	7.14082	8.61794	0	166.98	47	66.601	4.35048	1.52251	25.0367	24.905	25.0109	24.9756	24.8745	25.0353	23.5097	23.5497	23.3257	23.2671	23.674	23.5411
Color [DarkGray]	1	4	P40018	P40018	Small nuclear ribonucleoprotein-associated protein B	SMB1	RSMB_YEAST Small nuclear ribonucleoprotein-associated protein B OS=Saccharomyces cerevisiae (strain ATCC 204508 / S288c) OX=559292 GN=SMB1 PE=1 SV=1	GEQILSTVVEDKPLLSK	0	1	0	0	0	0	1	0	0	0	0	8.7	0	0	0	0	1	0	0	0		5.46184	6.60798	0.0035971	2.1781	1	22.379	0.723071	1.52233	17.1852	17.4973	19.8854	19.2965	19.8747	19.9854	16.6714	15.8887	17.4407	17.1686	15.8055	16.2845
Color [DarkGray]	1	4	P38741	P38741	Meiotic activator RIM4	RIM4	RIM4_YEAST Meiotic activator RIM4 OS=Saccharomyces cerevisiae (strain ATCC 204508 / S288c) OX=559292 GN=RIM4 PE=1 SV=1	AQGTLLNGR;DNANRPYAFVQYNNDHDAK;FGGLEQIVPDR;GTVTTTSTSTESR;KSMPNSWSSPSSK;LTSDGIYDDEDKDSEITIDKR;MKTEISTADSLRDPPSNGLK;NGGSNFNHHQFFSTR;NQQSIDFNEISQICEK;SIFVGQLDKETTR;SIFVGQLDKETTREELNR;SMPNSWSSPSSK;SVNSENESVNGGDENSELPSEIPESSGR;TDPNWIIEWAQNINVPK;YHQNNGIINNDGSNNNDNNNSNNNNR	15	11	7	9	12	15	11	7	9	12	31.7	22.7	17.7	19.6	24.5	15	11	6	10	10	+	7.02999	8.6792	0	190.85	154	80.108	4.04488	1.52229	23.9032	23.8259	23.8734	23.0989	22.9796	22.907	22.1664	22.3921	22.4771	22.4797	22.6163	22.8804
Color [DarkGray]	1	4	P40069	P40069	Importin subunit beta-4	KAP123	IMB4_YEAST Importin subunit beta-4 OS=Saccharomyces cerevisiae (strain ATCC 204508 / S288c) OX=559292 GN=KAP123 PE=1 SV=1	ANTFENISTMAR;EHFLPYVEQSLK;EQNPFVHEMLEALVIR;ESGYAFIANLAK;ETALNTIWNVVK;EVASAALSELALGTK;FAASIPSVVNVLDAVIK;FHEEYLPLIIDIIDSAK;HWNAIDESTR;LYQENSPVITNETPR;MDQQFLSQLEQTLHAITSGVGLK;SDAFAEFAEPLVNSAYEAIK;SDAFAEFAEPLVNSAYEAIKTDSAR;SLSAQALNHVSALIEEQETINPVQAQK;SSAVGAASELALGMK;TILPEIFK;TSVHYLEK;VFDNFRPVVFGLFQSK;VLNEQVDESYGLR;VYGENFAPFLK;YLNTTYNGIVAQNPVLAAVIA	5	2	20	4	14	5	2	20	4	14	6	2.1	26.1	7.1	19.3	1	1	16	1	6	+	6.30816	8.15585	0	57.918	86	122.6	1.6618	1.46276	20.2893	20.6554	21.0138	18.8106	19.9136	19.8306	19.0043	18.713	19.853	20.5629	19.8466	20.6677
Color [DarkGray]	1	4	P32074	P32074	Coatomer subunit gamma	SEC21	COPG_YEAST Coatomer subunit gamma OS=Saccharomyces cerevisiae (strain ATCC 204508 / S288c) OX=559292 GN=SEC21 PE=1 SV=2	ADANSFAGPNLDDHQEDLLATK;AISLTEPEAEFVVR;FENSTSGDLPDK;FKNSIVEALIDIVSFVPQSK;IILNSSCLPVESTQFAPSDSNSHTLK;IVVCNPELESLINDSNR;KLDEIVMEGFLNNLTFTTK;LVAPELYAAAISALQSLLTVPR;NDPTLYESIISLLK;NDPTLYESIISLLKR;NISTYAITTLLK;NKDDVIAQNLIESK;NSIVEALIDIVSFVPQSK;SETTLDTTPEAESVPEKR;SILNFLIDVLK;VVLENSIIR;YADELLSIEQIKPFGQLVNSSR	8	6	14	3	9	8	6	14	3	9	13.8	10.2	21.2	4.7	13.5	1	3	14	0	5	+	6.07635	8.02156	0	37.392	75	104.83	1.56919	1.44488	20.411	20.4699	20.4339	19.7573	19.9974	19.9971	18.8612	18.3357	19.7833	20.0896	20.0014	19.8352
Color [DarkGray]	1	4	P40150	P40150	Heat shock protein SSB2	SSB2	SSB2_YEAST Ribosome-associated molecular chaperone SSB2 OS=Saccharomyces cerevisiae (strain ATCC 204508 / S288c) OX=559292 GN=SSB2 PE=1 SV=2	ARFEDLNAALFK;AVITVPAYFNDAQR;DAGAISGLNVLR;ENTLLGEFDLK;FDDESVQK;FDDESVQKDMK;FEDLNAALFK;HVLIFDLGGGTFDVSLLHIAGGVYTVK;IEAALSDALAALQIEDPSADELR;IEAALSDALAALQIEDPSADELRK;IINEPTAAAIAYGLGAGK;IINEPTAAAIAYGLGAGKSEK;KKTGLDISDDAR;KTGLDISDDAR;LESYVASIEQTVTDPVLSSK;LLSDFFDGK;LLSDFFDGKQLEK;LSSEEIEKMVNQAEEFK;LSSEEIEKMVNQAEEFKAADEAFAK;MKEIAEAK;MVNQAEEFK;MVNQAEEFKAADEAFAK;NIPMMPAGEPVLEAIFEVDANGILK;NQAALNPR;NTTVPTIK;N…	37	41	41	33	33	1	2	2	0	0	65.6	67.2	71.5	62.2	65.9	47	52	57	26	32	+	8.16077	9.81082	0	323.31	642	66.594	5.98751	1.44226	25.2603	25.201	25.281	25.3616	25.3089	25.3511	23.7713	23.8247	23.8195	23.8784	23.8304	23.801
Color [DarkGray]	1	4	P34909	P34909	General negative regulator of transcription subunit 4	MOT2	NOT4_YEAST General negative regulator of transcription subunit 4 OS=Saccharomyces cerevisiae (strain ATCC 204508 / S288c) OX=559292 GN=MOT2 PE=1 SV=1	QSLAAEEYKDPYDALGNAVDFLDAR	1	0	1	1	1	1	0	1	1	1	4.3	0	4.3	4.3	4.3	0	0	0	0	0		5.91121	7.30914	0.0019194	2.6468	4	65.353	0.353767	1.4013	20.0117	20.1686	19.9988	17.2572	16.6917	20.5432	20.2321	20.376	15.3671	19.5398	17.3435	19.7613
Color [DarkGray]	1	4	P43603	P43603	LAS seventeen-binding protein 3	LSB3	LSB3_YEAST LAS seventeen-binding protein 3 OS=Saccharomyces cerevisiae (strain ATCC 204508 / S288c) OX=559292 GN=LSB3 PE=1 SV=3	AGFLFSGR;AGSGVIVAR;AKGLAIITILK;AVALYSFAGEESGDLPFR;FTAPTSPSTSSPK;FYGDNCTAK;GLAIITILK;GSFDDDEDDYYDDDDYYNDIPSSFSSTDASSTRPNTR;ILASFVKPNQVFGADQVIPPDVLK;ILASFVKPNQVFGADQVIPPDVLKR;IRPPPAVDPLFR;ISSASTPQTSQGR;KGDVITILK;KSDSQNDWWTGR;LAPTNSGGSGGKLDDPSGASSYYASHR;LAPTNSGGSGGKLDDPSGASSYYASHRR;SAEAAASASAGGVAAVFAYSK;SDSQNDWWTGR;TKDREVDDLSNR;WADDEYDDYDDDYESGYR;YTFDDDDDDDDYGTGYSR	19	14	16	11	17	14	10	12	8	12	55.3	42.7	46.8	37.7	50.1	16	10	14	9	14	+	7.42698	9.01187	0	323.31	199	49.343	4.66434	1.38401	23.9734	24.0071	24.1124	23.2644	23.0821	23.2083	22.5604	22.7004	22.6801	22.8798	22.9149	23.005
Color [DarkGray]	1	4	P12688	P12688	Serine/threonine-protein kinase YPK1	YPK1	YPK1_YEAST Serine/threonine-protein kinase YPK1 OS=Saccharomyces cerevisiae (strain ATCC 204508 / S288c) OX=559292 GN=YPK1 PE=1 SV=2	EISKEVDALIAQLSR;EKPIDSVVDEYLSESVQK;GYIPPYKPAVSNSMDTSNFDEEFTR;ILQEPLVFPDGFDRDAK;NQGPADEDLISSESAAK;VDCPFIVPLK;VSYDASSSTSTVR;VYNGDDFILPFPITSSEQILNK	5	2	6	4	5	4	2	5	4	5	11.8	5.7	14	10.3	12.8	3	1	5	1	4	+	6.12018	7.79842	0	21.979	47	76.479	2.49714	1.37982	20.5332	20.6214	20.7565	17.3865	18.8759	19.059	19.4151	19.5116	18.845	19.5717	19.8056	19.4582
Color [DarkGray]	1	4	Q03144	Q03144	Pyridoxal 5-phosphate synthase subunit SNO1	SNO1	SNO1_YEAST Pyridoxal 5-phosphate synthase subunit SNO1 OS=Saccharomyces cerevisiae (strain ATCC 204508 / S288c) OX=559292 GN=SNO1 PE=1 SV=1	CDFSNFIPGCDNFPATFIR;CLAENDYGIK;DVVVAATQNHNILVTSFHPELADSDTR;TGLYPCLYEFVHNPEK;TPEDLAQCDALIIPGGESTSMSLIAQR;VIGVLALQGAFLEHTNHLK	0	2	6	0	0	0	2	6	0	0	0	12.9	52.7	0	0	0	0	8	0	0		6.17403	7.6035	0	16.04	20	24.906	0.575632	1.35441	16.3283	19.5677	16.6074	19.1809	19.3419	19.9851	16.1616	16.4036	15.875	15.1279	15.0311	15.0088
Color [DarkGray]	1	4	Q02260	Q02260	Small nuclear ribonucleoprotein Sm D1	SMD1	SMD1_YEAST Small nuclear ribonucleoprotein Sm D1 OS=Saccharomyces cerevisiae (strain ATCC 204508 / S288c) OX=559292 GN=SMD1 PE=1 SV=1	QIILPDSLNLDSLLVDQK	0	1	0	0	0	0	1	0	0	0	0	12.3	0	0	0	0	1	0	0	0		5.77329	6.55144	0.0096308	1.5275	4	16.275	0.625667	1.32967	16.0072	18.929	18.6698	18.7952	19.865	19.5218	16.2225	16.467	16.9275	17.2283	17.1508	15.483
Color [DarkGray]	1	4	P46654;P32905	P46654;P32905	40S ribosomal protein S0-B;40S ribosomal protein S0-A	RPS0B;RPS0A	RSSA2_YEAST 40S ribosomal protein S0-B OS=Saccharomyces cerevisiae (strain ATCC 204508 / S288c) OX=559292 GN=RPS0B PE=1 SV=2;RSSA1_YEAST 40S ribosomal protein S0-A OS=Saccharomyces cerevisiae (strain ATCC 204508 / S288c) OX=559292 GN=RPS0A PE=1 SV=3	EASYVNIPVIALTDLDSPSEFVDVAIPCNNR;FAAHTGATPIAGR;FTPGSFTNYITR;IIAAIPNPEDVVAISSR;NVQVHQEPYVFNARPDGVHVINVGK;SLPATFDLTPEDAQLLLAANTHLGAR	5	3	6	4	4	5	3	6	4	4	36.9	22.2	49.2	32.5	32.5	5	1	9	3	2		7.05496	8.31649	0	30.068	55	27.962	0.812775	1.29742	21.7796	20.9352	20.9989	19.5876	20.2326	18.6785	20.7157	20.5355	18.5703	20.6081	20.9424	20.718
Color [DarkGray]	1	4	P18480	P18480	SWI/SNF chromatin-remodeling complex subunit SNF5	SNF5	SNF5_YEAST SWI/SNF chromatin-remodeling complex subunit SNF5 OS=Saccharomyces cerevisiae (strain ATCC 204508 / S288c) OX=559292 GN=SNF5 PE=1 SV=3	GQQTAQTQLEQQR;IFTPNLLQISAAELER	1	2	1	0	0	1	2	1	0	0	1.8	3.2	1.8	0	0	0	2	0	0	0	+	4.89659	6.31156	0.0035211	2.0433	5	102.54	2.36044	1.27701	18.8474	18.6857	18.586	18.4531	16.5941	18.3552	17.1309	17.8248	17.3324	15.9271	16.0317	15.9403
Color [DarkGray]	1	4	Q12125	Q12125	Golgi to ER traffic protein 4	GET4	GET4_YEAST Golgi to ER traffic protein 4 OS=Saccharomyces cerevisiae (strain ATCC 204508 / S288c) OX=559292 GN=GET4 PE=1 SV=1	LLEGDFVYEAER	0	1	1	0	1	0	1	1	0	1	0	3.8	3.8	0	3.8	0	1	1	0	1		5.81774	7.04821	0.0035714	2.1212	12	36.28	0.345062	1.25785	16.6264	20.1484	19.4872	19.0863	16.6942	19.2329	16.5595	19.602	16.327	19.5568	19.4159	19.6588
Color [DarkGray]	1	4	P40188	P40188	Respiratory growth induced protein 2	RGI2	RGI2_YEAST Respiratory growth induced protein 2 OS=Saccharomyces cerevisiae (strain ATCC 204508 / S288c) OX=559292 GN=RGI2 PE=1 SV=1	HLHQHVEK;IVWNYGEETELNAK;TAINKPELK	1	2	0	1	3	1	2	0	1	3	4.9	13.4	0	4.9	18.9	0	2	0	1	1	+	6.46342	7.46342	0	6.9011	11	19.229	2.54228	1.25782	21.6923	21.1287	21.3016	20.4536	20.2586	20.3569	20.2416	19.9243	20.1833	20.2761	19.9205	20.5011
Color [DarkGray]	1	4	P36007	P36007	Threo-3-hydroxyaspartate ammonia-lyase	SRY1	LTHAD_YEAST L-threo-3-hydroxyaspartate ammonia-lyase OS=Saccharomyces cerevisiae (strain ATCC 204508 / S288c) OX=559292 GN=SRY1 PE=1 SV=1	ELLEEVGQLDALFVPLGGGGLLSGSALAAR;GVIAFSSGNHAQAIALSAK;IFGVEPEAGNDGQQSFR;LGAQIYFKGENFQR;LLNVPATIVMPEDAPALK;MIVPTYGDVLDASNR;QLAAEHGFALIPPYDHPDVIAGQGTSAK;SGSIVHINTPK;TIADGAQTQHLGEYTFAIIR;VAATAGYGAHIIR;VGIILSGGNVDMK;VGIILSGGNVDMKR;VVVEPTACLGFAGALLK;YATLISGKEDGPTI	3	5	13	2	3	3	5	13	2	3	18.4	31	65.3	9.8	17.2	0	1	21	1	1		6.72595	8.26021	0	59.14	68	34.899	0.782548	1.21547	19.6627	20.6029	20.6711	19.8047	20.3295	19.586	20.1163	19.2521	17.9218	19.2589	19.0136	19.3899
Color [DarkGray]	1	4	P20459	P20459	Eukaryotic translation initiation factor 2 subunit alpha	SUI2	IF2A_YEAST Eukaryotic translation initiation factor 2 subunit alpha OS=Saccharomyces cerevisiae (strain ATCC 204508 / S288c) OX=559292 GN=SUI2 PE=1 SV=1	GIEQLESAIEK;LLEYDNIEGMILLSELSR;LVAAPLYVLTTQALDK;SAEDMSTEQMQVK	1	2	3	1	0	1	2	3	1	0	5.3	8.9	14.8	3.6	0	0	1	0	0	0		5.6005	6.92273	0.0018904	2.5271	7	34.717	0.982648	1.20976	18.8874	19.0882	18.8823	19.1834	19.1886	19.0264	18.6855	16.7069	17.8361	16.1194	18.641	15.8092
Color [DarkGray]	1	4	Q07825	Q07825	Putative Xaa-Pro aminopeptidase FRA1	FRA1	FRA1_YEAST Putative Xaa-Pro aminopeptidase FRA1 OS=Saccharomyces cerevisiae (strain ATCC 204508 / S288c) OX=559292 GN=FRA1 PE=1 SV=1	ITSQASSAEHEFLIPDSASWQMVR;LIFPENTPGFNIDAIAR;QELDYNWTLLR	0	2	1	0	2	0	2	1	0	2	0	3.7	2.3	0	3.7	0	1	0	0	2		5.32627	6.92833	0	3.3807	12	84.923	0.41046	1.19936	16.8734	19.3408	19.0745	19.0031	19.5303	19.1575	15.6371	18.9673	17.0864	19.1353	18.6439	18.633
Color [DarkGray]	1	4	P25087	P25087	Sterol 24-C-methyltransferase	ERG6	ERG6_YEAST Sterol 24-C-methyltransferase OS=Saccharomyces cerevisiae (strain ATCC 204508 / S288c) OX=559292 GN=ERG6 PE=1 SV=4	EVTAALENAAVGLVAGGK;FTGCNVIGLNNNDYQIAK;FYKGESFAASIAR;GDLVLDVGCGVGGPAR;IAYEIELGDGIPK;KPENAETPSQTSQEATQ;LEGVYSEIYK;LFTPMMLFVAR;LGLAPEGSKEVTAALENAAVGLVAGGK;MDFEENTFDKVYAIEATCHAPK;QFTTAMVTVMEK;VYAIEATCHAPK;YVQNLANLATFFR	9	4	9	8	8	9	4	9	8	8	33.2	14.9	36	28.7	28.7	6	2	12	5	7	+	6.86162	8.30477	0	155.82	100	43.43	4.88161	1.16483	22.0942	22.1492	22.1482	20.9624	21.0843	20.8235	20.9708	21.0342	20.8922	20.7861	20.7931	20.7148
Color [DarkGray]	1	4	Q01560	Q01560	Nucleolar protein 3	NPL3	NOP3_YEAST Nucleolar protein 3 OS=Saccharomyces cerevisiae (strain ATCC 204508 / S288c) OX=559292 GN=NPL3 PE=1 SV=1	DFDGTGALEFPSEEILVEALER;ILNGFAFVEFEEAESAAK;QEGELSNTR;SFANQPLEVVYSK	3	2	2	2	3	3	2	2	2	3	10.6	8.5	8.5	8.5	12.8	3	3	2	2	3	+	6.38975	7.75148	0	27.657	29	45.407	2.79346	1.14875	21.3277	21.4292	21.3832	20.9269	21.3886	20.7757	20.514	20.1674	20.0124	21.1053	20.6757	20.6952
Color [DarkGray]	1	4	P26321	P26321	60S ribosomal protein L5	RPL5	RL5_YEAST 60S ribosomal protein L5 OS=Saccharomyces cerevisiae (strain ATCC 204508 / S288c) OX=559292 GN=RPL5 PE=1 SV=4	FPGWDFETEEIDPELLR;LGLDETYKGVEEVEGEYELTEAVEDGPRPFK;VFLDIGLQR	0	2	0	0	1	0	2	0	0	1	0	16.2	0	0	10.4	0	2	0	0	1		5.24334	7.21283	0	3.8293	7	33.714	0.705334	1.14151	18.2296	18.3045	16.5573	21.449	14.9982	21.4659	17.4875	15.9934	16.1859	21.0286	20.2899	19.3802
Color [DarkGray]	1	4	P54861	P54861	Dynamin-related protein DNM1	DNM1	DNM1_YEAST Dynamin-related protein DNM1 OS=Saccharomyces cerevisiae (strain ATCC 204508 / S288c) OX=559292 GN=DNM1 PE=1 SV=1	ASLEDLIPTVNK;AVMCLLVNYCK;DKFLNYFFGK;ETLFEELLVEDQTLAQDR;FSTNFISSIDGTSSDINTK;ISGFEAGTKPLEYR;IYYIYNNVFGNSLK;LDLMDSGTNALDILSGK;LLLEPSQR;LQDVMYDSGIDTLDLPILAVVGSQSSGK;LYKETLFEELLVEDQTLAQDR;NLQISDFSLGDIDDLENAEPPLTEREELECELIK;NSTGPRPTLFVPELAFDLLVKPQIK;RPLVLQLNNISPNSPLIEEDDNSVNPHDEVTK;SIAGDGNIEDFR;SIDPTSNLSVLDVR;SMLIEVISELLR;SQQDIQLNK;SSILETLVGR;SSILETLVGRDFLPR;SYVESLIDIHR;TVEESLDKEEDYFR;VFSPHVLNLTLVDLPGI…	11	7	18	12	11	11	7	18	12	11	22.6	14.3	37.1	23	26.3	6	8	18	5	8	+	6.73004	8.57094	0	71.329	176	84.971	3.758	1.13529	22.0961	21.9814	22.0538	21.3388	20.6828	20.8205	20.7776	20.903	21.0449	20.9552	21.2125	21.1041
Color [DarkGray]	1	4	P0CX56;P0CX55	P0CX56;P0CX55	40S ribosomal protein S18-B;40S ribosomal protein S18-A	RPS18B;RPS18A	RS18B_YEAST 40S ribosomal protein S18-B OS=Saccharomyces cerevisiae (strain ATCC 204508 / S288c) OX=559292 GN=RPS18B PE=1 SV=1;RS18A_YEAST 40S ribosomal protein S18-A OS=Saccharomyces cerevisiae (strain ATCC 204508 / S288c) OX=559292 GN=RPS18A PE=1 SV=1	IVQIMQNPTHYK;SLVVQEQGSFQHILR	0	1	0	0	1	0	1	0	0	1	0	10.3	0	0	10.3	0	2	0	0	1		5.94122	6.94122	0	9.9974	11	17.037	0.864117	1.12175	16.8978	18.3678	16.3655	20.2137	20.3519	20.1401	15.9335	16.1681	16.1642	19.5499	19.8506	18.8195
Color [DarkGray]	1	4	P48589	P48589	40S ribosomal protein S12	RPS12	RS12_YEAST 40S ribosomal protein S12 OS=Saccharomyces cerevisiae (strain ATCC 204508 / S288c) OX=559292 GN=RPS12 PE=1 SV=1	GEALLVVLVSSVTEANIIK;KVVGASVVVVK;LVEGLANDPENK;NWGAETDELSMIMEHFSQQ;QLGEWAGLGK;TALVHDGLAR;VVGASVVVVK	4	7	5	4	3	4	7	5	4	3	35	56.6	48.3	41.3	28	1	9	2	2	2		7.32187	8.16696	0	16.944	50	15.471	1.80216	1.118	21.4991	22.0595	22.338	22.8917	22.7162	22.7108	20.6291	20.8435	21.07	20.7933	21.0147	21.0122
Color [DarkGray]	1	4	P35187	P35187	ATP-dependent helicase SGS1	SGS1	SGS1_YEAST ATP-dependent helicase SGS1 OS=Saccharomyces cerevisiae (strain ATCC 204508 / S288c) OX=559292 GN=SGS1 PE=1 SV=1	DIRPQLSNMSIR;EEDELTMEAEDDAHSSYMTTR;ETATLQEDKDFVFQAIQK;IVQANHDTLEEHGIGK;LVESIQNER;NTIFEICDAVK;SLCYQLPAVVK;SQVSSQDDNIISSILPSPLEYNTSSR;STTIGGNVAANPPR;SYTYGGSTMGSSHPITLK;TNLYYEVNKK;VLQEYSIMNNSGFASSYVK	1	9	0	0	0	1	9	0	0	0	1.5	8.8	0	0	0	0	6	0	0	0		5.29695	7.41881	0	14.949	21	163.84	0.816372	1.07349	17.2565	16.1134	18.0764	20.9219	21.0223	20.8466	16.5071	15.8627	15.856	16.6613	17.7836	16.2673
Color [DarkGray]	1	4	P17555	P17555	Adenylyl cyclase-associated protein	SRV2	CAP_YEAST Adenylyl cyclase-associated protein OS=Saccharomyces cerevisiae (strain ATCC 204508 / S288c) OX=559292 GN=SRV2 PE=1 SV=1	LEDVTIYQEGYIQNK;NNKPSDSGADANTTNEPSAENAPEVEQDPK	2	2	2	1	1	2	2	2	1	1	8.6	8.6	8.6	2.9	2.9	1	2	1	2	1		5.78628	7.60979	0	8.5793	22	57.521	0.326696	1.05433	20.4587	20.6276	20.6512	20.8491	20.5378	20.3618	21.0431	16.8838	20.6475	20.901	20.8833	21.0447
Color [DarkGray]	1	4	P22213	P22213	Protein SLY1	SLY1	SLY1_YEAST Protein SLY1 OS=Saccharomyces cerevisiae (strain ATCC 204508 / S288c) OX=559292 GN=SLY1 PE=1 SV=1	KTGVTNISDLDPNSNNDTVQIQEVVK;NLETTDSYLYIDPK;NLLEDLAQQVSITGK;SLEDGSDSAFKPSNLTLSGIYGLTEGK	1	0	3	0	1	1	0	3	0	1	2.3	0	8.4	0	2.3	0	0	3	0	0		5.38475	7.04591	0	14.317	8	74.678	1.5756	1.04932	18.151	18.4287	17.9037	17.5859	18.0078	16.0698	16.6739	17.592	17.0695	17.4116	17.3899	16.3993
Color [DarkGray]	1	4	P38325	P38325	Mitochondrial outer membrane protein OM14	OM14	OM14_YEAST Mitochondrial outer membrane protein OM14 OS=Saccharomyces cerevisiae (strain ATCC 204508 / S288c) OX=559292 GN=OM14 PE=1 SV=1	GKPNSTVLATTAGALGLLTLDGIISK;GKPNSTVLATTAGALGLLTLDGIISKK;HDSNASPNSDSEDGHHHNNK;HDSNASPNSDSEDGHHHNNKK;LNSASAVACGYLQAFVSK	3	2	3	3	3	3	2	3	3	3	48.5	29.1	48.5	48.5	48.5	3	3	3	3	3		6.98693	8.02024	0	15.877	59	14.609	3.14308	1.03589	21.521	21.4456	21.5807	20.839	20.7211	20.8002	20.6143	20.2768	20.5484	20.2483	19.9598	20.0748
Color [DarkGray]	1	4	P10591	P10591	Heat shock protein SSA1	SSA1	HSP71_YEAST Heat shock protein SSA1 OS=Saccharomyces cerevisiae (strain ATCC 204508 / S288c) OX=559292 GN=SSA1 PE=1 SV=4	ARFEELCADLFR;ATAGDTHLGGEDFDNR;ATAGDTHLGGEDFDNRLVNHFIQEFK;AVGIDLGTTYSCVAHFANDRVDIIANDQGNR;DAGTIAGLNVLR;DAKLDKSQVDEIVLVGGSTR;DNNLLGKFELSGIPPAPR;ELQDIANPIMSK;ETAESYLGAK;FEELCADLFR;FELSGIPPAPR;FKEEDEKESQR;GKEEHVLIFDLGGGTFDVSLLSIEDGIFEVK;IASKNQLESIAYSLK;IINEPTAAAIAYGLDK;IINEPTAAAIAYGLDKK;ITITNDKGR;KDLSTNQR;KSEIFSTYADNQPGVLIQVFEGER;LDKSQVDEIVLVGGSTR;LIDVDGKPQIQVEFK;LIDVDGKPQIQVEFKGETK;LSKEDIEK;LVNHFIQE…	33	36	37	30	34	7	8	8	8	8	56.9	64.2	65	59.2	65	39	58	63	36	37	+	8.12021	9.87988	0	323.31	725	69.656	4.57771	1.02219	25.1649	25.1689	25.1632	25.4928	25.393	25.4735	24.0755	24.1214	24.2336	24.087	24.1366	24.1295
Color [DarkGray]	1	4	P32606	P32606	Putative mitochondrial translation system component PET127	PET127	PT127_YEAST Putative mitochondrial translation system component PET127 OS=Saccharomyces cerevisiae (strain ATCC 204508 / S288c) OX=559292 GN=PET127 PE=1 SV=2	DIPSTQTPNFFHASDVSTWEVNSTFTDINDK;EIVLSVLGHYLEDFLTEK;FFNEPVLNIVALPLSPEYEDK;HVEQLLNSSNTK;IACLVANR;KNDILDTESR;MSMNLFSNILK;MYNFDPAVENINPEYLEK;NCNYSESAYFPSAVILR;SDLHSALEMVDEIYDTNSTVEDIGNKEK;SENYHYSSIDEFIVR;SQLDAYDPNLPGTGVFDLK;YDLSHVESNNNQTGYEIDKVYGEFESLER	0	10	0	0	0	0	10	0	0	0	0	23.8	0	0	0	0	12	0	0	0		6.03906	7.80481	0	120.44	30	93.406	1.07246	1.00496	17.019	17.9251	17.1551	22.0747	22.1986	21.9439	15.6855	16.6749	16.7238	16.8142	16.7329	17.6485
Color [DarkGray]	1	4	P10592	P10592	Heat shock protein SSA2	SSA2	HSP72_YEAST Heat shock protein SSA2 OS=Saccharomyces cerevisiae (strain ATCC 204508 / S288c) OX=559292 GN=SSA2 PE=1 SV=3	ARFEELCADLFR;ATAGDTHLGGEDFDNR;ATAGDTHLGGEDFDNRLVNHFIQEFK;AVGIDLGTTYSCVAHFSNDRVDIIANDQGNR;DAGTIAGLNVLR;DAKLDKSQVDEIVLVGGSTR;DNNLLGKFELSGIPPAPR;ETAESYLGAK;FEELCADLFR;FELSGIPPAPR;FKEEDEKESQR;GKEEHVLIFDLGGGTFDVSLLSIEDGIFEVK;IASKNQLESIAYSLK;IINEPTAAAIAYGLDK;IINEPTAAAIAYGLDKK;ITITNDKGR;KDLSTNQR;KSEVFSTYADNQPGVLIQVFEGER;LDKSQVDEIVLVGGSTR;LIDVDGKPQIQVEFK;LIDVDGKPQIQVEFKGETK;LSKEDIEK;LVNHFIQEFK;LVNHFIQEFK…	6	7	8	6	5	5	5	6	5	4	57.9	62.1	66	57.1	60.4	7	9	16	5	5		6.9339	8.80592	0	44.597	135	69.469	3.73405	1.00351	22.9474	23.1232	22.9837	23.2094	23.3239	23.4369	21.9254	22.0094	22.109	22.0663	21.933	22.2988
Color [DarkGray]	1	4	P05756	P05756	40S ribosomal protein S13	RPS13	RS13_YEAST 40S ribosomal protein S13 OS=Saccharomyces cerevisiae (strain ATCC 204508 / S288c) OX=559292 GN=RPS13 PE=1 SV=3	KGLTPSQIGVLLR;LSSESVIEQIVK;SNGLAPEIPEDLYYLIK	1	2	1	1	1	1	2	1	1	1	7.9	16.6	7.9	7.9	7.9	0	2	0	1	1		6.23292	7.18715	0	4.3438	12	17.029	1.99379	0.994633	19.8713	20.2235	20.5421	20.3341	20.0746	20.7421	19.2469	19.3702	19.0359	20.0298	19.7973	20.2984
Color [DarkGray]	1	4	P06634	P06634	ATP-dependent RNA helicase DED1	DED1	DED1_YEAST ATP-dependent RNA helicase DED1 OS=Saccharomyces cerevisiae (strain ATCC 204508 / S288c) OX=559292 GN=DED1 PE=1 SV=2	AGNTGLATAFFNSENSNIVK;DFLSDYIFLSVGR;DVPEPITEFTSPPLDGLLLENIK;ELATQIFDEAKK;GLDIPNVTHVINYDLPSDVDDYVHR;HIVEDCDMTPVGER;SALLDLLSASTDGLTLIFVETKR;TGGFLFPVLSESFK;TGPSPQPESQGSFYQR;VLYVENQDKK	4	2	7	3	8	4	2	7	3	8	12.1	7.5	22.2	9.8	23.5	2	1	7	2	6		6.06543	7.85261	0	23.119	64	65.552	1.11669	0.974622	20.788	20.9672	20.9601	20.6432	20.7548	20.2853	20.4171	19.1237	20.2506	20.8421	20.674	20.5913
Color [DarkGray]	1	4	P47064	P47064	AP-3 complex subunit sigma	APS3	AP3S_YEAST AP-3 complex subunit sigma OS=Saccharomyces cerevisiae (strain ATCC 204508 / S288c) OX=559292 GN=APS3 PE=1 SV=1	LLLEQVYELISQR	0	0	1	0	0	0	0	1	0	0	0	0	6.7	0	0	0	0	1	0	0		5.35835	6.1365	0.0093604	1.4164	3	21.938	1.13018	0.972843	17.1004	17.1584	16.0608	16.674	16.8179	16.7572	15.4171	15.9915	15.9924	16.0287	15.355	15.9218
Color [DarkGray]	1	4	P00927	P00927	Threonine dehydratase, mitochondrial	ILV1	THDH_YEAST Threonine dehydratase, mitochondrial OS=Saccharomyces cerevisiae (strain ATCC 204508 / S288c) OX=559292 GN=ILV1 PE=1 SV=2	EDLLPVFSFK;FLGGLSDSWNLTLFHYR;GLTNIPPFDHPYVIAGQGTVAMEILR;IGAVFVPVGGGGLIAGIGAYLK;IGAVFVPVGGGGLIAGIGAYLKR;IIGVETYDAATLHNSLQR;IISFEFPERPGALTR;LDELQTDNTPDYVR;LGSQVVLYGNDFDEAKAECAK;QVMQQLNALGFEAVDISDNELAK;SSVYDVINESPISQGVGLSSR;YISTVHPEIDHTK	5	1	9	2	3	5	1	9	2	3	13.4	3.1	24	4.3	8	1	1	11	1	2		6.02922	8.04151	0	56.759	48	63.83	2.78715	0.961546	20.5648	20.5947	20.7981	16.3747	19.0424	17.2623	19.8886	19.6469	19.5375	20.1043	20.3247	19.9379
Color [DarkGray]	1	4	P39990	P39990	13 kDa ribonucleoprotein-associated protein	SNU13	SNU13_YEAST 13 kDa ribonucleoprotein-associated protein OS=Saccharomyces cerevisiae (strain ATCC 204508 / S288c) OX=559292 GN=SNU13 PE=1 SV=1	ACGVSRPVIAASITTNDASAIK;AFPLADAALTQQILDVVQQAANLR;DKIETLLI	3	3	3	3	3	3	3	3	3	3	42.9	42.9	42.9	42.9	42.9	2	5	4	2	3		6.7337	7.90935	0	37.225	43	13.569	4.96597	0.948694	20.8993	20.9123	20.8702	21.6057	22.302	21.8516	19.9349	19.8948	20.0061	20.858	21.2662	20.9829
Color [DarkGray]	1	4	P12612	P12612	T-complex protein 1 subunit alpha	TCP1	TCPA_YEAST T-complex protein 1 subunit alpha OS=Saccharomyces cerevisiae (strain ATCC 204508 / S288c) OX=559292 GN=TCP1 PE=1 SV=2	EQLAIAEFAAALLIIPK;GANDYSLDEMER;IACLDLNLQK;IIGADSDFFSNMVVDALLAVK;ILVELAQQQDR;MAMGVQINIDDPEQLEQIR;MLVDDIGDFTVTNDGATILSLLDVQHPAGK;SALEACVAILR;SATESLLVPGYALNCTVASQAMPK;SSLGPVGLDK;SYHAASQMAKPEDVK	4	1	10	0	3	4	1	10	0	3	11.8	3	30.4	0	8.9	0	0	8	0	2		6.08307	7.61317	0	22.536	36	60.48	0.964835	0.940344	18.4454	17.0128	17.9977	16.8018	17.4354	16.2	16.5359	17.0473	17.0516	18.8383	18.82	18.8485
Color [DarkGray]	1	4	P37304	P37304	Protein PAM1	PAM1	PAM1_YEAST Protein PAM1 OS=Saccharomyces cerevisiae (strain ATCC 204508 / S288c) OX=559292 GN=PAM1 PE=1 SV=2	GLHGPSAASSSPVISANNFVDPVSSGTPYSSNSSR	0	0	0	0	1	0	0	0	0	1	0	0	0	0	4.2	0	0	0	0	0		4.7329	6.35616	0	3.8783	5	92.871	0.445903	0.934825	16.87	19.1516	16.1882	15.7005	15.2954	15.2673	16.6152	16.2874	16.5027	18.8308	18.7369	18.2026
Color [DarkGray]	1	4	P40010	P40010	Nuclear GTP-binding protein NUG1	NUG1	NUG1_YEAST Nuclear GTP-binding protein NUG1 OS=Saccharomyces cerevisiae (strain ATCC 204508 / S288c) OX=559292 GN=NUG1 PE=1 SV=1	EFDLDGLFSSLDK;SVIDASDVILYVLDAR	1	1	1	1	0	1	1	1	1	0	3.1	3.1	3.1	3.1	0	0	1	1	0	0		5.22058	6.63555	0.0018587	2.4082	5	57.708	1.02435	0.925083	18.2994	18.513	17.7134	17.2486	18.6515	17.1769	16.8636	16.9377	17.9492	15.6778	17.6349	17.1578
Color [DarkGray]	1	4	P40561	P40561	RNA-binding protein SGN1	SGN1	SGN1_YEAST RNA-binding protein SGN1 OS=Saccharomyces cerevisiae (strain ATCC 204508 / S288c) OX=559292 GN=SGN1 PE=1 SV=1	LSIEGTPQVSQK;STSQKPVVMPSDNVK	0	1	1	0	1	0	1	1	0	1	0	4.8	4.8	0	4.8	0	2	1	0	1		5.95303	6.95303	0.001938	2.779	10	28.954	0.289029	0.918019	16.0668	17.034	20.1688	16.4824	19.9449	19.6833	16.1611	17.1567	17.1977	19.4609	19.8734	20.0309
Color [DarkGray]	1	4	Q12154	Q12154	ATPase GET3	GET3	GET3_YEAST ATPase GET3 OS=Saccharomyces cerevisiae (strain ATCC 204508 / S288c) OX=559292 GN=GET3 PE=1 SV=1	RQEQGEGETFDTVIFDTAPTGHTLR;YLDQIDELYEDFHVVK	1	0	2	2	2	1	0	2	2	2	4.5	0	11.6	11.6	11.6	0	0	4	0	3		6.07602	7.48471	0	8.684	21	39.353	1.72355	0.91207	20.722	20.1694	20.8	17.7807	19.9084	19.824	19.394	19.8413	19.7199	19.8898	19.9844	17.0503
Color [DarkGray]	1	4	P53600	P53600	Coatomer subunit zeta	RET3	COPZ_YEAST Coatomer subunit zeta OS=Saccharomyces cerevisiae (strain ATCC 204508 / S288c) OX=559292 GN=RET3 PE=1 SV=1	SDEGHQLLFNSVK;SSLSLYTVQAVLILDQQGER	1	2	2	1	1	1	2	2	1	1	6.9	17.5	17.5	10.6	6.9	0	1	2	0	0		5.82373	7.11334	0	31.48	11	21.687	1.08034	0.893825	19.3804	18.8122	19.0388	19.5545	19.2338	18.3646	18.0438	17.6552	18.8509	18.5343	16.3393	18.6823
Color [DarkGray]	1	4	P22202	P22202	Heat shock protein SSA4	SSA4	HSP74_YEAST Heat shock protein SSA4 OS=Saccharomyces cerevisiae (strain ATCC 204508 / S288c) OX=559292 GN=SSA4 PE=1 SV=3	ARFEELCADLFR;DAGTIAGLNVLR;DNNLLGKFELSGIPPAPR;FEELCADLFR;FELSGIPPAPR;IINEPTAAAIAYGLDK;IINEPTAAAIAYGLDKK;ITITNDKGR;KSEVFSTYADNQPGVLIQVFEGER;LVNFLAEEFK;NQLESYAFTLK;NSTIPTKK;SEVFSTYADNQPGVLIQVFEGER;TKDNNLLGK;TKDNNLLGKFELSGIPPAPR;TTPSYVAFTDTER	2	2	0	1	1	0	1	0	0	0	19.5	17.9	15.7	16.4	17.8	0	1	0	0	0		5.64754	7.17901	0	3.3682	7	69.65	2.27796	0.87335	20.7821	20.324	20.4526	20.3057	15.9218	20.9125	19.5793	19.8063	19.553	19.9753	19.6127	19.4744
Color [DarkGray]	1	4	P28241	P28241	Isocitrate dehydrogenase [NAD] subunit 2, mitochondrial	IDH2	IDH2_YEAST Isocitrate dehydrogenase [NAD] subunit 2, mitochondrial OS=Saccharomyces cerevisiae (strain ATCC 204508 / S288c) OX=559292 GN=IDH2 PE=1 SV=1	ELSKEYPDLTLETELIDNSVLK;ENTEGEYSGIEHIVCPGVVQSIK;EYPDLTLETELIDNSVLK;GPLATPIGK;ISIFEAVHGSAPDIAGQDK;KIFSAANVPIEWESCDVSPIFVNGLTTIPDPAVQSITK;LADGLFVNVAK;NLVALKGPLATPIGK;TFGLFANVRPAK;TGDLAGTATTSSFTEAVIK;TGDLAGTATTSSFTEAVIKR;TTYENVDLVLIR;TTYENVDLVLIRENTEGEYSGIEHIVCPGVVQSIK;YTGKPNPSTGK;YTVSFIEGDGIGPEISK	13	10	13	10	13	13	10	13	10	13	43.9	34.1	43.9	35.8	53.9	9	5	18	6	16		7.70082	9.02763	0	152.95	157	39.739	5.4989	0.868992	23.6799	23.7498	23.7116	22.5386	22.5426	22.4746	22.8678	22.8384	22.828	22.9861	22.9825	22.8696
Color [DarkGray]	1	4	P38764	P38764	26S proteasome regulatory subunit RPN1	RPN1	RPN1_YEAST 26S proteasome regulatory subunit RPN1 OS=Saccharomyces cerevisiae (strain ATCC 204508 / S288c) OX=559292 GN=RPN1 PE=1 SV=3	LCLDIVPYFLK;TAYSIYLSQNELTDAIALAVR	0	0	1	0	0	0	0	1	0	0	0	0	2.1	0	0	0	0	1	0	0		4.62001	6.3102	0.0094787	1.4533	5	109.49	0.547296	0.863838	15.7184	17.5779	17.5945	16.9235	17.1961	17.1814	16.46	16.3686	15.4706	16.6869	16.3152	15.8949
Color [DarkGray]	1	4	P39078	P39078	T-complex protein 1 subunit delta	CCT4	TCPD_YEAST T-complex protein 1 subunit delta OS=Saccharomyces cerevisiae (strain ATCC 204508 / S288c) OX=559292 GN=CCT4 PE=1 SV=2	GANNMIIDETER;GIHPTIIADSFQSAAK;GLGCKPIADIELFTEDR;GLIAGGGAPEIEISR;IVSQYSSFLAPLAVDSVLK;LGSADLVEEIDSDGSK;SGTTNTYEEHILQPVLVSTSAITLASECVK;SLHDALCVIR	5	2	6	3	3	5	2	6	3	3	18.4	6.6	19.3	8.5	8.5	1	1	6	1	1		6.16817	7.74141	0	15.328	37	57.603	3.2173	0.857327	20.4623	20.6911	20.4163	19.031	18.9159	19.1952	19.6516	19.7065	19.6396	19.7849	19.4459	19.1458
Color [DarkGray]	1	4	Q12223	Q12223	DNA repair protein RAD59	RAD59	RAD59_YEAST DNA repair protein RAD59 OS=Saccharomyces cerevisiae (strain ATCC 204508 / S288c) OX=559292 GN=RAD59 PE=1 SV=1	ECQPFTAVNNGENTNTSEVK;ITNNYYVDGLYGSK;VTLKDGTNTQCGGLGR;YTYNIYHNNK	0	4	0	0	0	0	4	0	0	0	0	25.2	0	0	0	0	6	0	0	0		5.17298	7.02629	0	6.2538	11	26.63	0.600338	0.829687	17.9056	17.5606	17.2449	20.7934	20.1459	20.4498	17.9015	16.3294	15.9913	17.1419	17.0636	16.0124
Color [DarkGray]	1	4	P47079	P47079	T-complex protein 1 subunit theta	CCT8	TCPQ_YEAST T-complex protein 1 subunit theta OS=Saccharomyces cerevisiae (strain ATCC 204508 / S288c) OX=559292 GN=CCT8 PE=1 SV=1	ELDEMVVGEITDKNDKNELLK;GATQNNLDDIER;GTVLLHNAQEMLDFSKGEEK;IDMGDGTNLVMILAGELLNVSEK;LLPGAGATEIELISR;QGYNSYSNADGQIIK;TLAETAGLDVNEVLPNLYAAHNVTEPGAVK;VAVFTCPLDIANTETK;VCGATPLPR	3	0	8	4	5	3	0	8	4	5	7.6	0	23.1	9	13.9	1	0	5	1	3		6.20279	7.77044	0	16.429	30	61.662	2.34967	0.80464	20.4886	20.393	20.2357	16.0125	19.1167	19.2372	19.3319	19.7017	19.6698	19.6581	19.6719	19.8148
Color [DarkGray]	1	4	P25613	P25613	Accumulation of dyads protein 2	ADY2	ADY2_YEAST Accumulation of dyads protein 2 OS=Saccharomyces cerevisiae (strain ATCC 204508 / S288c) OX=559292 GN=ADY2 PE=1 SV=1	IYTGGDNNEYIYIGR;QNSYVLARPFPLPSTER;SDLYQAFGGTLNPGLAPAPVHK	3	3	2	3	2	3	3	2	3	2	19.1	19.1	13.1	19.1	13.1	1	1	1	1	1		6.23596	7.76982	0	12.284	17	30.726	3.00266	0.787231	21.725	21.6229	21.7016	21.2728	21.391	21.1871	20.7277	20.9503	21.01	20.8566	20.5672	20.8257
Color [DarkGray]	1	4	P02309	P02309	Histone H4	HHF1	H4_YEAST Histone H4 OS=Saccharomyces cerevisiae (strain ATCC 204508 / S288c) OX=559292 GN=HHF1 PE=1 SV=2	DNIQGITKPAIR	1	1	1	1	1	1	1	1	1	1	11.7	11.7	11.7	11.7	11.7	1	1	1	1	1		6.69809	7.47624	0.0095087	1.4668	12	11.368	2.12355	0.758499	20.9601	21.0141	20.9594	21.6635	21.4359	21.7028	20.1067	20.0333	20.518	20.2251	19.9917	16.2768
Color [DarkGray]	1	4	P19358	P19358	S-adenosylmethionine synthase 2	SAM2	METK2_YEAST S-adenosylmethionine synthase 2 OS=Saccharomyces cerevisiae (strain ATCC 204508 / S288c) OX=559292 GN=SAM2 PE=1 SV=3	DGSLPWLRPDTK;DMLDENTK;DMLDENTKYFIQPSGR;FVIGGPQGDAGLTGR;FVIGGPQGDAGLTGRK;IIVDAYGGASSVGGGAFSGK;IIVDAYGGASSVGGGAFSGKDYSK;KIIVDAYGGASSVGGGAFSGK;KIIVDAYGGASSVGGGAFSGKDYSK;LDYQQIVR;LNMAMADARR;NFDLRPGVLVK;RIDTVVISAQHADEISTADLR;SDDEIIEIIK;SDDEIIEIIKK;SLEDLGAGDQGIMFGYATDETPEGLPLTILLAHK;SLVAAGLCK;SLVAAGLCKR;TCNVLVAIEQQSPDIAQGLHYEK;TGMIMVFGEITTK;TQVTVEYEDDNGR;TQVTVEYEDDNGRWVPK;YFIQPSGR	4	2	9	5	6	4	2	9	5	6	39.1	32	58.9	41.9	45.8	0	1	7	2	4		6.63529	8.30159	0	108.68	42	42.255	2.66475	0.757688	21.7827	21.9663	21.6536	20.1361	20.9245	20.895	20.9415	21.0445	21.1436	21.2054	21.4562	21.5151
Color [DarkGray]	1	4	P36139	P36139	Protein PET10	PET10	PET10_YEAST Protein PET10 OS=Saccharomyces cerevisiae (strain ATCC 204508 / S288c) OX=559292 GN=PET10 PE=1 SV=3	AIVSTGLDLGNATIEK;ASREDQTNSKPAAVSTN;EDQTNSKPAAVSTN;EFLIKPLHLQGSTASK;EGAFKLDELVNLLVFK;EGVDGLLYNWK;EIGSSGEENKVTDASSLPHVAELSSTTR;EKYDAIVKPTTDK;FTTVYENNLSK;GMSQEIQSK;LDELVNLLVFK;LQSVYIDPTK;SESSISSSKPSVELPQATWSHLQR;SNYIDPTKDLAK;VKSNYIDPTKDLAK;YAESLPPVER;YDAIVKPTTDKLQSVYIDPTK	13	14	16	10	8	13	14	16	10	8	55.5	68.2	63.3	50.5	34.6	7	13	24	9	8		7.46577	9.05173	0	323.31	191	31.246	4.33542	0.75607	23.9611	23.9841	23.9005	23.5939	23.5449	23.5947	23.2549	23.1577	23.1648	23.2521	22.983	23.1202
Color [DarkGray]	1	4	P36015	P36015	Synaptobrevin homolog YKT6	YKT6	YKT6_YEAST Synaptobrevin homolog YKT6 OS=Saccharomyces cerevisiae (strain ATCC 204508 / S288c) OX=559292 GN=YKT6 PE=1 SV=1	ALELSEVK;ALELSEVKDLSQFGFFER;DLSQFGFFER;EEWADVTETNDALK;GEKLDNLVDKSESLTASSK;IYYIGVFR;LDNLVDKSESLTASSK;QSIEEGNYIGHVYAR;SEGICGVLITDKEYPVRPAYTLLNK;SSVGQFMTFFAETVASR;TIENVLQR;VQQELDETK;VQQELDETKIVLHK;YQDPSQADAIMK	10	7	12	7	7	10	7	12	7	7	54	47	68	47	47	6	2	14	4	5		7.00238	8.57051	0	182.07	115	22.707	4.95658	0.752361	22.031	21.9726	22.0018	20.7398	20.8805	20.6331	21.2055	21.2672	21.2756	20.9616	20.9606	21.0111
Color [DarkGray]	1	4	P28834	P28834	Isocitrate dehydrogenase [NAD] subunit 1, mitochondrial	IDH1	IDH1_YEAST Isocitrate dehydrogenase [NAD] subunit 1, mitochondrial OS=Saccharomyces cerevisiae (strain ATCC 204508 / S288c) OX=559292 GN=IDH1 PE=1 SV=2	AVHETIAEGK;DIGGSSSTTDFTNEIINK;DYAVFEPGSR;EGVYEAVESLKR;ENTEGEFSGLEHESVPGVVESLK;FAFDFAK;FTVTLIPGDGVGK;FTVTLIPGDGVGKEITDSVR;GLWHTPADQTGHGSLNVALR;GLWHTPADQTGHGSLNVALRK;GQNVANPTAMILSSTLMLNHLGLNEYATR;IPDIDLIVIR;KQLDIYANVALFK;KSVTAVHK;LGDGLFR;NIITEIGQK;QLDIYANVALFK;QTDHKEGVYEAVESLKR;TIFEAENIPIDWETINIK;TRIPDIDLIVIR	16	15	19	16	17	16	15	19	16	17	55.6	45.6	58.9	53.6	56.9	10	10	29	16	18		7.75568	9.29288	0	265.76	264	39.324	3.4445	0.740877	24.6433	24.7762	24.6006	23.185	23.3777	23.3385	24.0108	23.8833	23.9034	23.8058	23.8051	23.8128
Color [DarkGray]	1	4	P25694	P25694	Cell division control protein 48	CDC48	CDC48_YEAST Cell division control protein 48 OS=Saccharomyces cerevisiae (strain ATCC 204508 / S288c) OX=559292 GN=CDC48 PE=1 SV=3	AAAPTVVFLDELDSIAK;AVATEVSANFISVK;DTVLIVLIDDELEDGACR;EVDIGIPDATGRLEVLR;LDQLIYVPLPDENAR;LGDLVTIHPCPDIK;NAPAIIFIDEIDSIAPK;RYEAYSQQMK;SNVVVIAATNRPNSIDPALRR;VVSQLLTLMDGMK	4	7	6	3	5	4	7	6	3	5	8	13.8	11.9	5.7	9.3	3	4	3	1	4		5.97421	7.85405	0	14.865	47	91.995	1.33757	0.733468	20.3497	20.447	20.6035	20.7543	20.9589	20.8424	20.0137	19.9424	19.2437	20.0767	20.0417	19.7799
Color [DarkGray]	1	4	P38687	P38687	Signal recognition particle subunit SRP68	SRP68	SRP68_YEAST Signal recognition particle subunit SRP68 OS=Saccharomyces cerevisiae (strain ATCC 204508 / S288c) OX=559292 GN=SRP68 PE=1 SV=1	AEQFLETDSDFAK;DSVTETESISQTPISNEQTEGEPK;IENGGNSVITLAEYEKR;ISNNLALVFAALEHLK;LSEIESLDEILLPANLLSLNSVR;QYAGNLITTPEINNFIVER;VQSDENKDDELVK;YGEINSEDYDNKTK	0	5	1	0	2	0	5	1	0	2	0	15	2.7	0	6	0	6	0	0	1		6.05934	7.71928	0	148.1	26	69.005	0.361097	0.714839	15.7868	18.2009	18.2285	21.8336	22.409	22.4977	16.8849	16.8202	16.3666	17.6349	16.9206	16.4078
Color [DarkGray]	1	4	P31374	P31374	Serine/threonine-protein kinase PSK1	PSK1	PSK1_YEAST Serine/threonine-protein kinase PSK1 OS=Saccharomyces cerevisiae (strain ATCC 204508 / S288c) OX=559292 GN=PSK1 PE=1 SV=2	DIKDENVIVDSK;DVVFEEYNTNPSQLK;ENPFYNIDEILEGDLK;SFYTSVGIDGLHR;SLLNLLNETLEK	1	0	4	0	0	1	0	4	0	0	0.9	0	4.1	0	0	0	0	4	0	0		4.79409	6.65742	0	9.4565	11	152.33	2.36325	0.691626	17.9915	17.8611	17.6547	15.8371	16.7367	17.2645	17.012	17.1909	17.2295	16.5162	16.4322	17.0634
Color [DarkGray]	1	4	P00937	P00937	Multifunctional tryptophan biosynthesis protein;Anthranilate synthase component 2;Indole-3-glycerol phosphate synthase	TRP3	TRPG_YEAST Multifunctional tryptophan biosynthesis protein OS=Saccharomyces cerevisiae (strain ATCC 204508 / S288c) OX=559292 GN=TRP3 PE=1 SV=2	LAGADTVLLIVK;NDAITVPEIAALNPDTLLISPGPGHPK;YTVEGVQFHPESILTEEGHLMIR	0	0	3	0	1	0	0	3	0	1	0	0	12.8	0	5.6	0	0	2	0	0		5.49757	6.97917	0	4.4932	3	53.489	0.224482	0.66412	17.6207	19.9297	17.3102	14.8409	16.2348	16.2133	17.0928	16.5649	19.2104	19.36	16.2283	16.9448
Color [DarkGray]	1	4	P32317	P32317	Protein AFG1	AFG1	AFG1_YEAST Protein AFG1 OS=Saccharomyces cerevisiae (strain ATCC 204508 / S288c) OX=559292 GN=AFG1 PE=1 SV=1	GIISSLGDLYDSLVK	0	0	1	0	1	0	0	1	0	1	0	0	2.9	0	2.9	0	0	0	0	0		4.93407	6.33201	0.0093458	1.3853	1	58.264	1.06135	0.638998	16.9158	16.2829	17.002	15.8395	15.016	16.8356	16.4332	15.9283	15.9223	17.3747	17.4106	17.172
Color [DarkGray]	1	4	P52910	P52910	Acetyl-coenzyme A synthetase 2	ACS2	ACS2_YEAST Acetyl-coenzyme A synthetase 2 OS=Saccharomyces cerevisiae (strain ATCC 204508 / S288c) OX=559292 GN=ACS2 PE=1 SV=1	DGYLQNNATEGDAEHITPDNLR;EYLHWDAPYTK;GRVDDVVNVSGHR;GVVHTTGGYLLGAALTTR;KVSQIAGVLK;LNASYNCVDR;NCVICDTMWQTESGSHLIAPLAGAVPTK;TGTEGIPMK;TYLPPVSCDAEDPLFLLYTSGSTGSPK;VDDVVNVSGHR;VLGSVGEPISPDLWEWYHEK;VVITCDEGK	3	4	9	3	6	3	4	9	3	6	9.5	11.4	24.3	10.4	19.9	0	2	9	2	2		6.14758	8.08632	0	15.643	59	75.491	1.13565	0.629429	20.6136	20.9167	21.0523	19.9139	20.6659	20.8262	20.2238	20.6269	19.8437	20.5602	20.9006	20.4899
Color [DarkGray]	1	4	P47160	P47160	Epsin-3	ENT3	ENT3_YEAST Epsin-3 OS=Saccharomyces cerevisiae (strain ATCC 204508 / S288c) OX=559292 GN=ENT3 PE=1 SV=1	ALIELLSDDNKIR;ALQLLDYLIK;AQNVVFNYTEMEGK;EATNNEPWGASSTLMDQISQGTYNFR;GVAGGSASADGSLNSK;ILETFHYIDSQGR;SLEDTLANMSLYDAK	1	1	5	1	2	1	1	5	1	2	2.5	2.5	16.4	2.5	5.6	1	0	5	1	2		6.10459	7.62928	0	14.46	30	45.091	1.20959	0.610801	19.1015	19.3602	19.3682	16.988	17.2577	17.4589	19.087	18.3419	18.5685	19.6853	19.2202	19.5768
Color [DarkGray]	1	4	P28274	P28274	CTP synthase 1	URA7	URA7_YEAST CTP synthase 1 OS=Saccharomyces cerevisiae (strain ATCC 204508 / S288c) OX=559292 GN=URA7 PE=1 SV=2	ATTGNFDESMETVK;LKLDEISLTEEEKQR;NHPYYIATQYHPEYTSK;VGKENFALIHVSLVPVIHGEQK;VLDPSKPFLGLVAASAGILQDVIEGK;WVEATDLEPEAQESNK	1	0	4	2	1	1	0	4	2	1	2.6	0	13.5	5	2.4	0	0	4	1	1		5.24947	7.19645	0	32.17	17	64.71	0.218546	0.606321	19.3512	18.7149	19.8103	16.125	17.8316	16.4105	20.0115	19.3942	16.6517	16.4986	16.4144	16.5345
Color [DarkGray]	1	4	P26783	P26783	40S ribosomal protein S5	RPS5	RS5_YEAST 40S ribosomal protein S5 OS=Saccharomyces cerevisiae (strain ATCC 204508 / S288c) OX=559292 GN=RPS5 PE=1 SV=3	HTLDIINVLTDQNPIQVVVDAITNTGPR;QAVDVSPLRR;TIAETLAEELINAAK;WSFEEVEVKDASLVDYVQVR	1	1	2	1	4	1	1	2	1	4	6.7	6.7	19.1	6.7	32.4	1	1	2	0	4		6.08073	7.28605	0	14.949	23	25.038	1.75605	0.603476	19.8638	19.7657	19.6501	19.1744	19.3183	19.1929	18.88	19.239	19.3501	19.9822	19.9125	19.6132
Color [DarkGray]	1	4	P38689	P38689	Ribose-phosphate pyrophosphokinase 3	PRS3	KPR3_YEAST Ribose-phosphate pyrophosphokinase 3 OS=Saccharomyces cerevisiae (strain ATCC 204508 / S288c) OX=559292 GN=PRS3 PE=1 SV=1	AAEILLENR;AAEILLENRAK;AIENINNSKLDR;ENVNYMDSIIISPDAGGAK;ENVNYMDSIIISPDAGGAKR;LAVIDISSVLAESIRR;LGLQLTSSK;LLAPDVHR;RLGLQLTSSK;SVIAIVTHGVLSGR;VVCTNTVPFEEK	6	5	10	5	6	6	5	10	5	6	20.6	16.9	31.9	18.1	19.1	3	3	11	3	6		6.66544	8.11261	0	23.483	72	35.123	1.02242	0.591814	20.7839	20.8362	20.6736	20.2456	19.7764	20.4187	19.8674	19.9451	20.7058	19.7004	19.7138	19.7788
Color [DarkGray]	1	4	P38234	P38234	Protein RFS1	RFS1	RFS1_YEAST Protein RFS1 OS=Saccharomyces cerevisiae (strain ATCC 204508 / S288c) OX=559292 GN=RFS1 PE=1 SV=1	ETLVEYDYYLFGIPTK;VAILIYSVDDIIATLAENEKK	1	0	2	1	1	1	0	2	1	1	7.6	0	17.6	7.6	7.6	0	0	2	0	0		5.70772	6.85745	0	3.9297	7	22.921	0.207602	0.580072	18.8653	18.7579	17.9257	15.7363	16.7503	16.4605	18.7914	15.8676	19.1496	18.7114	18.4464	16.7605
Color [DarkGray]	1	4	P0CS90;P39987	P0CS90	Heat shock protein SSC1, mitochondrial	SSC1	HSP77_YEAST Heat shock protein SSC1, mitochondrial OS=Saccharomyces cerevisiae (strain ATCC 204508 / S288c) OX=559292 GN=SSC1 PE=1 SV=1	ADQLANDTENSLKEFEGK;AKIELSSTVSTEINLPFITADASGPK;ALKDAGLSTSDISEVLLVGGMSR;AQFETLTAPLVK;AQFETLTAPLVKR;DAGLSTSDISEVLLVGGMSR;DAGQIVGLNVLR;DKATNKDSSITVAGSSGLSENEIEQMVNDAEK;DSSITVAGSSGLSENEIEQMVNDAEK;FEDAEVQR;FKSQDEAR;FKTETGIDLENDR;FSRAQFETLTAPLVK;GQTYSPAQIGGFVLNK;HSNGDAWVEAR;IELSSTVSTEINLPFITADASGPK;IIENAEGSR;KQAIETANK;KSQIFSTAAAGQTSVEIR;LIGNFTLAGIPPAPK;MKETAEAYLGKPVK;NAVVTVPAYFNDSQR;QAVVNPENTLFATK;SLFGK…	22	26	34	21	20	22	26	34	21	20	45.6	49.7	58.3	41.4	41.1	15	21	42	13	15		7.67364	9.30285	0	323.31	369	70.627	3.6861	0.556569	23.5718	23.6503	23.6795	23.9527	23.8332	23.8881	23.0306	23.0721	23.1292	23.0606	22.9497	23.0308
Color [DarkGray]	1	4	P32473	P32473	Pyruvate dehydrogenase E1 component subunit beta, mitochondrial	PDB1	ODPB_YEAST Pyruvate dehydrogenase E1 component subunit beta, mitochondrial OS=Saccharomyces cerevisiae (strain ATCC 204508 / S288c) OX=559292 GN=PDB1 PE=1 SV=2	ELEDFAFPDTPTIVK;VLVPYSAEDAR	2	1	1	2	2	2	1	1	2	2	7.1	3	4.1	7.1	7.1	1	0	1	1	2		6.27834	7.48246	0	6.9458	15	40.053	1.25091	0.542518	20.5291	20.7519	21.0166	20.1577	20.36	15.2638	20.5036	20.0065	20.1599	20.493	20.1785	20.375
Color [DarkGray]	1	4	P34758	P34758	Protein SCD5	SCD5	SCD5_YEAST Protein SCD5 OS=Saccharomyces cerevisiae (strain ATCC 204508 / S288c) OX=559292 GN=SCD5 PE=1 SV=1	FLTNFNLSQK;FSEHITFQDPPNLNQESSNNSEAR;KQDPDAEDEDQDSNNDSPLDFTLPMDQLLK;NALNIGQFFAVLR;SFDWLNVPGLDLSSGDQAEK;TGDQKVDFDSFASLLLTGK;TLSGGDVYAESPEDMQVPLSLSQNQLTHEEIR	4	1	3	1	2	4	1	3	1	2	7.6	3.4	6	2.2	5.6	1	0	2	1	1		5.3561	7.12863	0	9.4086	24	97.304	1.30311	0.53732	19.1164	18.9098	19.0917	18.2794	18.7333	18.601	18.3275	18.3127	18.8657	18.3929	18.8995	18.3336
Color [DarkGray]	1	4	Q12464	Q12464	RuvB-like protein 2	RVB2	RUVB2_YEAST RuvB-like protein 2 OS=Saccharomyces cerevisiae (strain ATCC 204508 / S288c) OX=559292 GN=RVB2 PE=1 SV=1	ALEDEFAPIVMMATNR;AYLLFLDSAR;DVPFTAIAGSEIFSLELSK;TQGFLALFTGDTGEIR;TTDMETIYELGNK;YVQENESQYIDDQGNVQISIAK	3	4	3	1	0	3	4	3	1	0	8.9	14.2	11.5	2.8	0	1	2	3	1	0		5.77244	7.24957	0	32.839	18	51.611	0.280374	0.524485	19.2097	19.2309	18.393	20.2023	19.6976	19.9445	17.1163	18.6281	19.5158	16.118	16.8795	16.532
Color [DarkGray]	1	4	Q01574	Q01574	Acetyl-coenzyme A synthetase 1	ACS1	ACS1_YEAST Acetyl-coenzyme A synthetase 1 OS=Saccharomyces cerevisiae (strain ATCC 204508 / S288c) OX=559292 GN=ACS1 PE=1 SV=2	AAWPSFAR;AGDSYIENHSLK;AIIFEGDEPGQGYSITYK;ATQFLNWSKPFDK;CLGSVGEPIAAEVWEWYSEK;DGYIWILGR;DIGPFAAPK;DKDGYIWILGR;DLDWATEK;EHEYEHLTSVK;ELLEEVCQVAQVLTYSMGVR;ESIEDPAK;ESIEDPAKFFGSK;GDTVAVYMPMVPEAIITLLAISR;GVQHSTAGYLLGALLTMR;HLIDSVKL;IGAIHSVVFAGFSSNSLR;ILAGESDQLGDVSTLSNPGIVR;INDGDSKVVITTDESNR;INDGDSKVVITTDESNRGGK;IVDDALRETPGVR;KDIGPFAAPK;KEHEYEHLTSVK;KGDTVAVYMPMVPEAIITLLAISR;KILAGESDQLGDVSTLSNPGIVR;KTNNPS…	45	44	44	44	45	44	43	43	43	44	61.2	60.2	63.8	60	63.8	64	53	69	73	87		8.31838	10.141	0	323.31	1037	79.14	2.87111	0.521336	26.188	26.3414	26.3915	25.2405	25.1651	25.2306	25.7419	25.7945	25.8205	25.86	25.8623	25.9168
Color [DarkGray]	1	4	P15703	P15703	Glucan 1,3-beta-glucosidase	BGL2	BGL2_YEAST Glucan 1,3-beta-glucosidase OS=Saccharomyces cerevisiae (strain ATCC 204508 / S288c) OX=559292 GN=BGL2 PE=1 SV=1	STSDYETELQALK	0	1	1	1	1	0	1	1	1	1	0	4.2	4.2	4.2	4.2	0	0	0	1	0		5.88316	6.96234	0	5.0252	8	34.118	0.201618	0.518264	18.2102	20.1304	19.561	18.6714	17.8694	18.6124	19.5663	17.1605	19.62	19.0328	19.6052	19.8334
Color [DarkGray]	1	4	P38985	P38985	Signal recognition particle subunit SRP14	SRP14	SRP14_YEAST Signal recognition particle subunit SRP14 OS=Saccharomyces cerevisiae (strain ATCC 204508 / S288c) OX=559292 GN=SRP14 PE=1 SV=1	ASELDQFWQEYSSVFK;VPEFFQTANEK	0	2	0	0	1	0	2	0	0	1	0	18.5	0	0	11	0	3	0	0	1		5.87406	6.77715	0	3.4587	8	16.43	0.354376	0.513637	16.0329	17.3035	17.3152	19.8218	20.2452	19.7985	15.6227	17.1018	16.3862	16.002	16.6863	16.8788
Color [DarkGray]	1	4	P49334	P49334	Mitochondrial import receptor subunit TOM22	TOM22	TOM22_YEAST Mitochondrial import receptor subunit TOM22 OS=Saccharomyces cerevisiae (strain ATCC 204508 / S288c) OX=559292 GN=TOM22 PE=1 SV=3	VELTEIKDDVVQLDEPQFSR	0	0	1	0	0	0	0	1	0	0	0	0	13.2	0	0	0	0	1	0	0		6.1321	6.97719	0.0034542	1.9593	2	16.79	0.316464	0.507851	17.5721	16.6397	17.1676	18.0348	16.343	15.5031	16.0422	15.9978	17.8159	16.1582	16.8458	16.0532
Color [DarkGray]	1	4	P40024	P40024	ABC transporter ATP-binding protein ARB1	ARB1	ARB1_YEAST ABC transporter ATP-binding protein ARB1 OS=Saccharomyces cerevisiae (strain ATCC 204508 / S288c) OX=559292 GN=ARB1 PE=1 SV=1	DKYSNISQDFQFWR;EAAAEESEVDAAAR;LTAYGGNYDSYHK;TILEDGPESELLEPLYER;YGLTGEGQTVQMATLSEGQR	3	1	3	2	3	3	1	3	2	3	8.4	3.3	8.4	5.1	7.4	3	1	3	1	3		5.8912	7.53455	0	26.79	42	68.376	1.16297	0.497331	20.3599	19.9334	20.4864	19.3952	20.0568	16.6732	19.7971	19.9363	19.5543	19.962	19.7872	19.8359
Color [DarkGray]	1	4	P10659	P10659	S-adenosylmethionine synthase 1	SAM1	METK1_YEAST S-adenosylmethionine synthase 1 OS=Saccharomyces cerevisiae (strain ATCC 204508 / S288c) OX=559292 GN=SAM1 PE=1 SV=2	AGTFLFTSESVGEGHPDK;AGTFLFTSESVGEGHPDKICDQVSDAILDACLAEDPHSK;AQLKSEIIEK;DGSLAWLRPDTK;DLEDIGAGDQGIMFGYATDETPEGLPLTILLAHK;DMLDENTK;DMLDENTKYFIQPSGR;ELDLARPIYLPTASYGHFTNQEYPWEKPK;FVIGGPQGDAGLTGR;FVIGGPQGDAGLTGRK;ICDQVSDAILDACLAEDPHSK;IDTVVVSAQHADEITTEDLR;IIVDAYGGASSVGGGAFSGK;IIVDAYGGASSVGGGAFSGKDYSK;KIIVDAYGGASSVGGGAFSGK;KIIVDAYGGASSVGGGAFSGKDYSK;LNMAMADARR;NFDLRPGVLVK;PIYLPTASYGHFTNQEYPWEKPK;RDGSLAWL…	18	19	26	19	22	8	8	13	9	11	59.2	63.9	74.9	62.8	68.8	12	12	34	17	18		7.73261	9.24679	0	323.31	277	41.818	2.42382	0.48958	24.0245	23.9347	23.9993	23.2353	23.132	23.0925	23.3631	23.499	23.6277	23.3995	23.3677	23.4634
Color [DarkGray]	1	4	P36169	P36169	Suppressor of lethality of KEX2 GAS1 double null mutant protein 1	SKG1	SKG1_YEAST Suppressor of lethality of KEX2 GAS1 double null mutant protein 1 OS=Saccharomyces cerevisiae (strain ATCC 204508 / S288c) OX=559292 GN=SKG1 PE=1 SV=2	DALEDVFATPK;QSSNENLIR;SAAQSQLPNTFDKDNEGMDADHSVKDSR;SAITDKDKDLYK	2	1	3	2	2	2	1	3	2	2	11	3.1	9	6.5	5.6	1	1	3	1	1		6.21384	7.65774	0	5.2047	30	39.829	1.15352	0.486471	20.6923	20.8661	21.2361	20.8331	20.0883	19.9455	20.6587	20.4197	20.2567	19.7329	20.0162	19.4693
Color [DarkGray]	1	4	P53130	P53130	Heterotrimeric G protein gamma subunit GPG1	GPG1	GPG1_YEAST Heterotrimeric G protein gamma subunit GPG1 OS=Saccharomyces cerevisiae (strain ATCC 204508 / S288c) OX=559292 GN=GPG1 PE=1 SV=1	EVTATTLPSLLALLLEK;EVTATTLPSLLALLLEKR	0	0	1	0	0	0	0	1	0	0	0	0	13.5	0	0	0	0	1	0	0		6.09517	6.68126	0.0035587	2.0995	4	14.922	0.727877	0.480104	16.761	17.5526	16.9171	16.6595	17.0708	17.6369	16.9562	16.4474	16.3867	16.4718	15.9401	16.371
Color [DarkGray]	1	4	Q03940	Q03940	RuvB-like protein 1	RVB1	RUVB1_YEAST RuvB-like protein 1 OS=Saccharomyces cerevisiae (strain ATCC 204508 / S288c) OX=559292 GN=RVB1 PE=1 SV=1	EIVVNDVNEAK;EVYEGEVTELTPEDAENPLGGYGK;GLGLDESGVAK;LDPTIYESIQR;LQVESSALDLLATMGTETSLR;RVEGGFVGQIEAR;SDAYATEFDLETEEYVPLPK;TAAHTHIK;TALALAISQELGPK;VAISEVKENPGVNSSNSGAVTR;VPFCPLVGSELYSVEVK;YALQLLAPCGILAQTSNR	3	11	10	5	3	3	11	10	5	3	11.2	38	34.3	19.7	10.6	3	8	9	2	2		6.69645	8.11906	0	91.277	84	50.452	1.0907	0.447723	20.5381	20.818	20.9623	21.265	21.0942	21.5946	20.0551	20.5628	20.3574	19.7674	19.4405	18.8441
Color [DarkGray]	1	4	P38711;P35997	P38711;P35997	40S ribosomal protein S27-B;40S ribosomal protein S27-A	RPS27B;RPS27A	RS27B_YEAST 40S ribosomal protein S27-B OS=Saccharomyces cerevisiae (strain ATCC 204508 / S288c) OX=559292 GN=RPS27B PE=1 SV=1;RS27A_YEAST 40S ribosomal protein S27-A OS=Saccharomyces cerevisiae (strain ATCC 204508 / S288c) OX=559292 GN=RPS27A PE=1 SV=1	LSEGTSFR;VLVQDLLHPTAASEAR	2	2	2	2	2	2	2	2	2	2	29.3	29.3	29.3	29.3	29.3	1	1	1	1	1		6.66557	7.80381	0	5.1583	17	8.8653	1.74323	0.445512	21.9019	21.658	21.9247	21.7291	21.6016	21.9772	21.2306	21.4842	21.4332	21.4072	21.5989	21.9869
Color [DarkGray]	1	4	P54783	P54783	D-arabinono-1,4-lactone oxidase	ALO1	ALO_YEAST D-arabinono-1,4-lactone oxidase OS=Saccharomyces cerevisiae (strain ATCC 204508 / S288c) OX=559292 GN=ALO1 PE=1 SV=1	CSNTTLPSEPLDTSKR;DTDYDDFEMR;EQDPDNVFLANK;FLDAENDPEVFK;LYQLNEFLGAK;NFLGSTTLAAGPVKK;QWAIINGIIDPSELSD;QWDTLWTSSEFIR;SLDHSIAQAAINK;STQEVITFENLLK;TNTSPGPVYGNVCRPFLDNTPSHCR;YFQPSSIDEVVELVK	5	1	10	8	5	5	1	10	8	5	12.2	2.9	27.2	23.6	12.7	2	0	10	3	2		6.55781	8.12811	0	31.261	60	59.493	1.52369	0.439795	21.1492	21.0466	21.251	18.4083	19.3709	19.4037	20.8872	20.7583	20.482	20.2193	20.1747	20.0903
Color [DarkGray]	1	4	P20606	P20606	Small COPII coat GTPase SAR1	SAR1	SAR1_YEAST Small COPII coat GTPase SAR1 OS=Saccharomyces cerevisiae (strain ATCC 204508 / S288c) OX=559292 GN=SAR1 PE=1 SV=1	AGWDIFGWFR;DVLASLGLWNK;DVPFVILGNK;DYFPEVNGIVFLVDAADPER;DYFPEVNGIVFLVDAADPERFDEAR;FDEARVELDALFNIAELK;FTTFDLGGHIQAR;IDAPNAVSEAELR;IEGQRPVEVFMCSVVMR;LATLQPTWHPTSEELAIGNIK;LLFLGLDNAGK;NGYLEAFQWLSQYI;SALGLLNTTGSQR;TTLLHMLKNDR;VELDALFNIAELK;VELDALFNIAELKDVPFVILGNK;VELDALFNIAELKDVPFVILGNKIDAPNAVSEAELR	13	13	17	13	15	13	13	17	13	15	84.7	90	95.8	90	95.8	14	12	24	12	16		8.11123	9.45599	0	207.6	238	21.45	2.67523	0.424287	25.4204	25.4859	25.4049	25.0042	25.4276	25	24.9977	25.1141	24.9266	25.2029	25.2175	25.1264
Color [DarkGray]	1	4	P07251	P07251	ATP synthase subunit alpha, mitochondrial	ATP1	ATPA_YEAST ATP synthase subunit alpha, mitochondrial OS=Saccharomyces cerevisiae (strain ATCC 204508 / S288c) OX=559292 GN=ATP1 PE=1 SV=5	AQPTEVSSILEER;AVDALVPIGR;EAYPGDVFYLHSR;EKGELSKELLASLK;EVAAFAQFGSDLDASTK;GIRPAINVGLSVSR;GMALNLEPGQVGIVLFGSDR;GVSDEANLNETGR;HALIVYDDLSK;IGEFESSFLSYLK;IKGVSDEANLNETGR;QNQYSPLATEEQVPLIYAGVNGHLDGIELSR;QVAGSLK;RSVHEPVQTGLK;SNHNELLTEIR;STVAQLVQTLEQHDAMK;SVHEPVQTGLK;TAVALDTILNQK;TAVALDTILNQKR;TGNIVDVPVGPGLLGR;VVDALGNPIDGKGPIDAAGR	15	16	20	19	17	15	16	20	19	17	34.3	36.9	46.6	45.3	37.1	18	18	30	24	23		7.63564	9.31742	0	323.31	371	58.607	2.85886	0.419968	23.938	23.9247	24.0506	23.0917	23.004	23.0869	23.4826	23.5979	23.5729	23.4708	23.3769	23.6089
Color [DarkGray]	1	4	P26755	P26755	Replication factor A protein 3	RFA3	RFA3_YEAST Replication factor A protein 3 OS=Saccharomyces cerevisiae (strain ATCC 204508 / S288c) OX=559292 GN=RFA3 PE=1 SV=1	ASETPRVDPTEISNVNAPVFR;NNDDGELGFLILDAVLCK;TFEIDSWYEFVCR;VDPTEISNVNAPVFR	0	4	0	0	0	0	4	0	0	0	0	42.6	0	0	0	0	3	0	0	0		6.62675	7.47185	0	11.791	8	13.816	0.414598	0.403332	16.7599	16.5586	17.3039	21.6994	21.9701	21.6044	16.4012	17.1069	15.9043	15.6661	16.8452	16.9821
Color [DarkGray]	1	4	P07271	P07271	ATP-dependent DNA helicase PIF1	PIF1	PIF1_YEAST ATP-dependent DNA helicase PIF1 OS=Saccharomyces cerevisiae (strain ATCC 204508 / S288c) OX=559292 GN=PIF1 PE=1 SV=2	ESNSNQVHSLVSDEPR;ESSFDELQNNSISQER;KLDYAPGPK;LGNIDDETEREFK;MVLVEPEDWAIEDENEKPLVSR;SDIGEPVSPLDSSVFDFMK;SDIGEPVSPLDSSVFDFMKR	0	7	0	0	0	0	7	0	0	0	0	11.2	0	0	0	0	4	0	0	0		5.58397	7.48751	0	12.699	15	97.681	0.156994	0.397999	18.0084	17.983	16.5259	20.9606	21.6466	21.9342	16.1839	16.4102	18.7292	16.2911	17.8969	16.1299
Color [DarkGray]	1	4	Q04175	Q04175	Importin beta SMX1	SXM1	SXM1_YEAST Importin beta SMX1 OS=Saccharomyces cerevisiae (strain ATCC 204508 / S288c) OX=559292 GN=SXM1 PE=1 SV=1	DLASNLVEQFLR	0	0	1	0	1	0	0	1	0	1	0	0	1.3	0	1.3	0	0	1	0	1		4.46004	6.08329	0.0018657	2.4495	6	108.4	0.205986	0.388864	18.2429	16.4909	15.8261	16.0338	15.4022	16.4449	16.2428	16.5334	16.6171	16.4263	16.5983	17.1901
Color [DarkGray]	1	4	P25605	P25605	Acetolactate synthase small subunit, mitochondrial	ILV6	ILV6_YEAST Acetolactate synthase small subunit, mitochondrial OS=Saccharomyces cerevisiae (strain ATCC 204508 / S288c) OX=559292 GN=ILV6 PE=1 SV=2	EKQFHPANLPASEVLR;HATRPPLPTLDTPSWNANSAVSSIIYETPAPSR;ISLLGTEYFEDLLLHHHTSTNAGAADSQELVAEIR;KQHVLNCLVQNEPGVLSR;LKHEHLNDITNLTNNFGGR;LVEPFGVLECAR;QFHPANLPASEVLR;QIEDLVPVYAVLDYTNSEIIKR;VVDISETSCIVELSAKPTR	2	2	7	3	2	2	2	7	3	2	11	10	39.2	15.2	10	1	1	8	2	2		5.8995	7.85605	0	17.679	45	33.986	0.554144	0.388013	19.3653	20.3534	20.1923	19.2899	19.7446	19.1466	19.6716	19.5788	19.4966	19.2745	18.8479	19.7428
Color [DarkGray]	1	4	P35732	P35732	RNA polymerase II degradation factor 1	DEF1	DEF1_YEAST RNA polymerase II degradation factor 1 OS=Saccharomyces cerevisiae (strain ATCC 204508 / S288c) OX=559292 GN=DEF1 PE=1 SV=1	KTESPLENVAELKK;NNYNYYQTQNGQEQQSPNQGVAQHSEDSQQK	2	2	2	2	2	2	2	2	2	2	6.1	6.1	6.1	6.1	6.1	2	3	3	3	3		7.52507	8.72919	0	56.474	34	83.972	1.01938	0.385136	25.1816	25.4816	25.5171	24.8849	24.8048	24.9921	24.7258	25.1731	25.1259	24.5415	24.6043	24.9149
Color [DarkGray]	1	4	P56508	P56508	Protein SNA2	SNA2	SNA2_YEAST Protein SNA2 OS=Saccharomyces cerevisiae (strain ATCC 204508 / S288c) OX=559292 GN=SNA2 PE=1 SV=1	YSHLSSSDDNYGSLA	1	1	0	1	1	1	1	0	1	1	19	19	0	19	19	1	1	0	0	1		6.67152	6.97254	0	6.5545	10	9.1796	1.3788	0.380749	19.7891	19.814	20.144	18.7464	17.9041	15.0309	19.4623	19.6528	19.4898	18.9876	18.8717	18.8749
Color [DarkGray]	1	4	P51996	P51996	GTP-binding protein YPT32/YPT11	YPT32	YPT32_YEAST GTP-binding protein YPT32/YPT11 OS=Saccharomyces cerevisiae (strain ATCC 204508 / S288c) OX=559292 GN=YPT32 PE=1 SV=3	AQIWDTAGQER;ENADDNVAVGLIGNK;FTTDEFNIESK;GAVGALIVYDISK;GPTISLTPAPK;IKAQIWDTAGQER;IVLIGDSGVGK;SNEDYGYDYDYLFK	2	1	3	3	2	2	1	3	3	2	33.8	24.8	38.7	39.6	28.8	2	1	2	4	1		6.13094	7.33508	0	10.181	22	24.52	0.657067	0.37969	20.744	20.0906	20.3318	19.4692	16.7749	15.8465	20.1258	19.6577	20.2438	19.6708	20.2423	19.9049
Color [DarkGray]	1	4	P14742	P14742	Glutamine--fructose-6-phosphate aminotransferase [isomerizing]	GFA1	GFA1_YEAST Glutamine--fructose-6-phosphate aminotransferase [isomerizing] OS=Saccharomyces cerevisiae (strain ATCC 204508 / S288c) OX=559292 GN=GFA1 PE=1 SV=4	AIFEELSDIPVSVELASDFLDR;AIFEELSDIPVSVELASDFLDRK;DVTFVSHCGIAHTR;EFEAGSQNANLLPIAANEFNLR;EIYEQPESTFNTMR;FESDTDTECIAK;GEIIDTLVDGLQR;GPYDHFMQK;GYDSTGIAIDGDEADSTFIYK;GYQFAAALEGALK;HGVLALVDENLPIIAFGTR;IKEISYMHSEGVLAGELK;KGSPLLIGVK;LCATELKDQK;LKVDFVDVEFPEENAGQPEIPLK;QNPNRDVTFVSHCGIAHTR;RIEIIQGLK;SCHYPNEVIATR;SDPEDQFVVVHNGIITNFR;SIQTLEMELAQIMK;SRGEIIDTLVDGLQR;VSALKEEITK;VTHCGVHINAGPEIGVASTK;VVSSIEQVTAR;WAT…	17	13	23	16	21	17	13	23	16	21	36.8	29.8	45.9	34	40.3	9	9	27	13	21		7.04218	8.88288	0	147.69	256	80.046	2.68771	0.37948	22.254	22.277	22.3786	21.7469	21.9341	21.7184	21.8934	21.8804	21.9974	21.9615	21.9642	21.9049
Color [DarkGray]	1	4	P38077	P38077	ATP synthase subunit gamma, mitochondrial	ATP3	ATPG_YEAST ATP synthase subunit gamma, mitochondrial OS=Saccharomyces cerevisiae (strain ATCC 204508 / S288c) OX=559292 GN=ATP3 PE=1 SV=1	DAPTFQESALIADKLLSVMK;DLFEYTLANQMLTAMAQGYAAEISAR;ELIVAITSDKGLCGSIHSQLAK;GLCGSIHSQLAK;HLNDQPNADIVTIGDK;ISIFYNDPVSSLSFEPSEKPIFNAK;KMDEAEQLFYK;NLDVEATETGAPK;QAVITNELVDIITGASSLG;RHLNDQPNADIVTIGDK;TIEQSPSFGKFEIDTDANVPR	6	6	8	6	5	6	6	8	6	5	35	39.9	47.3	35.4	31.5	6	8	9	6	3		6.71757	8.36042	0	36.628	102	34.35	1.79965	0.379027	22.4319	22.3206	22.3448	22.0768	22.306	21.9433	21.867	22.1583	21.9349	21.8005	21.73	21.6153
Color [DarkGray]	1	4	P20967	P20967	2-oxoglutarate dehydrogenase, mitochondrial	KGD1	ODO1_YEAST 2-oxoglutarate dehydrogenase, mitochondrial OS=Saccharomyces cerevisiae (strain ATCC 204508 / S288c) OX=559292 GN=KGD1 PE=1 SV=2	AHIDPLGISFGSNK;ELATEILPHEPTNVPESTLK;FGLEGLESVVPGIK;LISEGTFSK;MSLKEIVDHLEK;SIGTKEETKR;SSLSEFTEGGFQWIIEDIEHGK;SVELGVEDIVLGMAHR	4	2	6	3	4	4	2	6	3	4	5.5	2.6	9.3	3.6	5.1	2	1	3	1	2		5.56633	7.77238	0	15.363	23	114.41	1.56826	0.377288	20.9584	20.8289	20.7567	20.9714	19.993	19.583	20.3046	20.6285	20.4789	20.6746	20.23	20.9188
Color [DarkGray]	1	4	P40327	P40327	26S protease regulatory subunit 4 homolog	RPT2	PRS4_YEAST 26S proteasome regulatory subunit 4 homolog OS=Saccharomyces cerevisiae (strain ATCC 204508 / S288c) OX=559292 GN=RPT2 PE=1 SV=3	TMLELLNQLDGFDDRGDVK;VAGENAPSIVFIDEIDAIGTK;VAGENAPSIVFIDEIDAIGTKR	1	1	2	0	2	1	1	2	0	2	4.3	5	9.2	0	9.2	0	0	1	0	1		5.25955	7.10452	0	4.6218	13	48.828	0.137029	0.355263	18.8075	18.3374	17.5125	18.6163	18.5022	15.5475	16.1055	18.7793	18.7068	18.6691	18.674	18.651
Color [DarkGray]	1	4	P38629	P38629	Replication factor C subunit 3	RFC3	RFC3_YEAST Replication factor C subunit 3 OS=Saccharomyces cerevisiae (strain ATCC 204508 / S288c) OX=559292 GN=RFC3 PE=1 SV=1	GLALIDLIEGIVK;ILEDYELQNEETR;LIILDEADAMTNAAQNALR	1	1	1	1	2	1	1	1	1	2	3.8	3.8	3.8	3.8	7.6	0	1	1	0	2		5.11066	6.43289	0	7.9358	11	38.203	0.704281	0.354778	17.4904	17.2551	17.266	17.4185	18.1985	17.0516	16.8727	16.6742	17.4003	17.4918	18.1096	17.3654
Color [DarkGray]	1	4	P30624	P30624	Long-chain-fatty-acid--CoA ligase 1	FAA1	LCF1_YEAST Long-chain-fatty-acid--CoA ligase 1 OS=Saccharomyces cerevisiae (strain ATCC 204508 / S288c) OX=559292 GN=FAA1 PE=1 SV=1	AANEHETAPR;CSTVYEFVLECFQK;DSSINIENYLEDAK;GILNQIDNLPFLTK;GILNQIDNLPFLTKK;GLIHSLVQTGSK;IGLKPNDDDKLHLYAATSHK;LVDVEELGYFAK;MFLGAQSQGIPVVTAYDTLGEK;SNEYVANICVYADQSK;TFSFDDILK;TGDIGEWEANGHLK;TKPVGIIVPNHAPLTK;VAQYTVPVGK;YIIHFDSISSEDRR	13	12	9	11	12	12	11	8	10	11	24	23	17.7	19.9	21.4	6	11	6	9	13		6.6774	8.40257	0	92.269	146	77.865	2.29414	0.353839	21.6694	21.5383	21.6031	21.1736	21.2325	21.3668	21.1508	21.3207	21.2778	21.1457	21.2541	21.2554
Color [DarkGray]	1	4	P00899	P00899	Anthranilate synthase component 1	TRP2	TRPE_YEAST Anthranilate synthase component 1 OS=Saccharomyces cerevisiae (strain ATCC 204508 / S288c) OX=559292 GN=TRP2 PE=1 SV=4	GATTEEDDALADQLR;LTDDSSPIPYPEQPPIK;QLQQQNDDSSINMYPVYAYLPSLDLTPHVAYLK;TGPTEGIETDPLEILEKEMSTFK	0	1	3	0	1	0	1	3	0	1	0	3	12.8	0	3	0	1	3	0	1		5.50048	7.04875	0	11.165	15	56.767	0.10865	0.334171	17.3013	17.6076	17.119	15.9613	15.819	15.7947	16.3441	15.5201	19.1612	15.2698	15.1742	16.2113
Color [DarkGray]	1	4	P05318	P05318	60S acidic ribosomal protein P1-alpha	RPP1A	RLA1_YEAST 60S acidic ribosomal protein P1-alpha OS=Saccharomyces cerevisiae (strain ATCC 204508 / S288c) OX=559292 GN=RPP1A PE=1 SV=4	STESALSYAALILADSEIEISSEK	0	1	0	0	0	0	1	0	0	0	0	22.6	0	0	0	0	1	0	0	0		5.24763	5.84968	0	3.9612	3	10.908	0.200449	0.32474	17.0551	17.0602	15.2591	17.5699	17.7225	17.7158	16.047	15.8857	16.4675	17.6181	16.1311	16.1879
Color [DarkGray]	1	4	P14680	P14680	Dual specificity protein kinase YAK1	YAK1	YAK1_YEAST Dual specificity protein kinase YAK1 OS=Saccharomyces cerevisiae (strain ATCC 204508 / S288c) OX=559292 GN=YAK1 PE=1 SV=1	ECLIHFLGGVLNLNPLER;GIWNPSYVNQGSQR;IIDFGSSCEEAR;SIQNSQELIDQEMQNR;TEYLTQSITEAK;TFTTQILDSLCVLK;TISPLVSVTK;VTNSQQNLVYPPQYDDLNSNESLDAYRR;WTPQQAMLHPFITK;YLVLDILGQGTFGQVVK	3	3	8	5	5	3	3	8	5	5	4.7	5.5	16	9.9	11	1	3	9	3	5		6.32752	7.97371	0	35.03	61	91.244	1.16604	0.310979	20.8648	20.9401	20.7523	20.7051	21.2752	21.0726	20.7658	20.4512	20.4072	20.838	20.8213	20.7715
Color [DarkGray]	1	4	P33327	P33327	NAD-specific glutamate dehydrogenase	GDH2	DHE2_YEAST NAD-specific glutamate dehydrogenase OS=Saccharomyces cerevisiae (strain ATCC 204508 / S288c) OX=559292 GN=GDH2 PE=1 SV=1	EASLLYAIPNNSFHEVYQR;EEILFFGPDEGTAGFVDWATNHAR;FASDAVGNDTLEHGKDTIKK;FEYPETPYGIFFVVGNTFK;NQDIYDLNSK;NTFHTQIFK;NVIDENYQLASTQQR	0	1	6	0	0	0	1	6	0	0	0	1.7	9.7	0	0	0	0	4	0	0		5.47257	7.50296	0	47.114	20	124.33	0.323046	0.309797	15.7835	17.146	16.4566	19.9121	20.394	19.5073	16.1827	16.1391	16.135	16.354	19.6221	19.5038
Color [DarkGray]	1	4	Q06142	Q06142	Importin subunit beta-1	KAP95	IMB1_YEAST Importin subunit beta-1 OS=Saccharomyces cerevisiae (strain ATCC 204508 / S288c) OX=559292 GN=KAP95 PE=1 SV=1	AAVGLIGDIAAMFPDGSIK;ALNQVDSPVSITAVGFIADISNSLEEDFRR;DVVPNLLNLLTR;KDSAFIEDDVFYAISALAASLGK;LAALNALADSLIFIK;STAEFAQLLENSILSPDQNIR;YLETFSPYLLK;YSDAMMNVLAQMISNPNAR	1	0	6	2	4	1	0	6	2	4	2.4	0	13.5	4.2	8.9	0	0	5	2	2		5.86091	7.36933	0	19.374	32	94.775	0.869416	0.304398	18.2929	18.7236	18.3737	16.9668	18.036	17.5091	18.2709	18.2366	17.9696	18.7328	18.8316	18.2524
Color [DarkGray]	1	4	P09457	P09457	ATP synthase subunit 5, mitochondrial	ATP5	ATPO_YEAST ATP synthase subunit 5, mitochondrial OS=Saccharomyces cerevisiae (strain ATCC 204508 / S288c) OX=559292 GN=ATP5 PE=1 SV=1	DRNSVIDAIVETHK;GTVTSAEPLDPK;IASDFGVLNDAHNGLLK;LFGVEGTYATALYQAAAK;LGHLLLNPALSLK;NSSIDAAFQSLQK	5	1	3	5	5	5	1	3	5	5	34.9	8.5	20.8	33	33	2	0	3	3	3		6.63945	7.81864	0	11.462	35	22.814	0.985381	0.301802	20.8317	20.3873	20.6066	19.0685	19.4721	19.4873	20.3842	20.1787	20.3574	20.2608	20.6071	20.5496
Color [DarkGray]	1	4	P36010	P36010	Nucleoside diphosphate kinase	YNK1	NDK_YEAST Nucleoside diphosphate kinase OS=Saccharomyces cerevisiae (strain ATCC 204508 / S288c) OX=559292 GN=YNK1 PE=1 SV=1	GDFGIDLGR;KEELVDWESNQAK;TFIAVKPDGVQR	1	1	3	3	2	1	1	3	3	2	7.8	5.9	22.2	22.2	16.3	0	0	3	2	4		6.84904	8.07148	0	34.266	22	17.166	0.69993	0.29834	21.9827	21.8612	22.2156	20.3849	20.6668	20.5489	21.9739	21.7772	21.4133	21.216	21.283	21.1081
Color [DarkGray]	1	4	P25453	P25453	Meiotic recombination protein DMC1	DMC1	DMC1_YEAST Meiotic recombination protein DMC1 OS=Saccharomyces cerevisiae (strain ATCC 204508 / S288c) OX=559292 GN=DMC1 PE=1 SV=1	ALNSEHQMELVEQLGEELSSGDYR;GLSEVKVEK;IIQVGFIPATVQLDIR;KPIGGHVLAHASATR;LIVVDSIMANFR;LNQHLFK;LQDSPDMPEKECVYVIGEK;NILSVDELQNYGINASDLQK;SGGIYTVNTVLSTTR;VAYIDTEGTFRPER;VYSLSTGSK	9	10	8	9	11	9	10	8	9	11	42.2	44.3	33.8	42.2	47.9	2	6	5	5	11		7.17014	8.57805	0	29.294	80	36.612	1.08676	0.288403	22.2329	22.5496	22.5858	22.1291	21.9332	22.2675	22.2688	22.1538	22.0806	22.2038	22.1974	22.2617
Color [DarkGray]	1	4	P05453	P05453	Eukaryotic peptide chain release factor GTP-binding subunit	SUP35	ERF3_YEAST Eukaryotic peptide chain release factor GTP-binding subunit OS=Saccharomyces cerevisiae (strain ATCC 204508 / S288c) OX=559292 GN=SUP35 PE=1 SV=1	ECPWYTGPTLLEYLDTMNHVDR;FVAQIAIVELK;IKGVEEEDISPGFVLTSPK;KGQSTLLMPNK;VIAVLETEAPVCVETYQDYPQLGR;YDQCVSNVSNFLR;YTILDAPGHK	3	1	5	3	6	3	1	5	3	6	6.9	1.9	12.6	5	14.5	1	0	5	1	5		6.07769	7.73063	0	26.629	46	76.55	1.11439	0.288172	20.3218	20.6346	20.6817	18.9842	19.7104	19.0185	20.3408	20.1857	20.247	20.2997	20.5915	20.2092
Color [DarkGray]	1	4	P13711	P13711	Acyl-coenzyme A oxidase	POX1	ACOX_YEAST Acyl-coenzyme A oxidase OS=Saccharomyces cerevisiae (strain ATCC 204508 / S288c) OX=559292 GN=POX1 PE=3 SV=2	DSHISDEITK;LGGAANAEILSK;LLAHIGTLVEK;TEPQLDQISGYSALLSGR;TTINPDSVVLNPQK;VLPQLCVPYLVSPVAFK;VVQPQLLALLPIVR	3	4	0	1	4	3	4	0	1	4	6.3	7.6	0	2.3	7.6	1	3	0	0	2		5.76617	7.45512	0	6.5182	22	84.041	1.0404	0.278943	19.6041	19.9418	19.9486	20.0332	20.3045	20.2507	19.4444	19.6078	19.6055	19.5291	19.1093	19.1518
Color [DarkGray]	1	4	Q07878	Q07878	Vacuolar protein sorting-associated protein 13	VPS13	VPS13_YEAST Vacuolar protein sorting-associated protein 13 OS=Saccharomyces cerevisiae (strain ATCC 204508 / S288c) OX=559292 GN=VPS13 PE=1 SV=1	AIVESVQEGGDVTK;AKEMNLDLR;ALENMQPLQIEQK;ARPSFAVSENPTEWFK;ASFELNPLDGLADSNLNIK;ASNQHMETIGNIVNAAEATVEGWTTQTR;ASQSSDSESIEVPTAILK;AYQTFSWK;DCLDSLNLPIDVK;DGGDRWPFSIR;DLTYDEIILFR;DQSSIDNHATGEEEEEDEPLLR;DYKYDEEIQLPDVSELK;EAQGQYWLK;ELSPEEYDKIDGNEINR;FHFEIGAK;FILIGDVHEMPILDMNVNEITASAK;FKESEWSSK;FLELHFDIDQAK;FLGGDSNWSQPFFIK;FSLEDGSPNALYK;FSVIDESHK;FSVIDESHKINHIK;FYLGEFFIENK;GHSEMDPAFSFDILTQR;GLSVTQDLEFQR;GQE…	67	79	83	62	83	67	79	83	62	83	28.8	34.6	40.3	28.1	37.4	51	78	90	59	94		7.44381	9.78049	0	323.31	1150	357.85	2.52314	0.276587	27.1534	27.246	27.2376	27.2532	27.2169	27.254	26.9356	26.8818	26.9899	27.2176	27.1732	27.1613
Color [DarkGray]	1	4	P40543	P40543	Uncharacterized protein YIL024C	YIL024C	YIC4_YEAST Uncharacterized protein YIL024C OS=Saccharomyces cerevisiae (strain ATCC 204508 / S288c) OX=559292 GN=YIL024C PE=1 SV=1	SNFLLVIPEDVIK	1	1	1	1	1	1	1	1	1	1	6.9	6.9	6.9	6.9	6.9	1	1	0	1	1		5.77488	6.61998	0.0033333	1.7757	12	21.791	0.881727	0.268833	18.2815	18.4108	18.6067	17.6616	17.4492	18.0069	18.3744	18.0829	18.0353	15.4489	17.6852	17.6779
Color [DarkGray]	1	4	P32342	P32342	Signal recognition particle subunit SRP21	SRP21	SRP21_YEAST Signal recognition particle subunit SRP21 OS=Saccharomyces cerevisiae (strain ATCC 204508 / S288c) OX=559292 GN=SRP21 PE=1 SV=3	SIQDIVGLATLIVNTDVEK;THNSHLSLNYK	0	2	0	0	0	0	2	0	0	0	0	18	0	0	0	0	2	0	0	0		5.4831	6.3282	0.0034014	1.8884	4	18.425	1.54197	0.261334	16.8556	16.9956	17.0213	18.8743	19.3054	18.1549	16.8137	16.6372	16.6377	17.5736	16.7871	15.9838
Color [DarkGray]	1	4	P40017	P40017	Carnitine O-acetyltransferase YAT2	YAT2	YAT2_YEAST Carnitine O-acetyltransferase YAT2 OS=Saccharomyces cerevisiae (strain ATCC 204508 / S288c) OX=559292 GN=YAT2 PE=1 SV=1	GQYYTLEVLDSTNK;LKESLEPLYYADGYYQHPLDPEQIEK;NPFLVLADDALPNITQADR;STALGSLTSHSFR	1	0	3	3	4	1	0	3	3	4	2.8	0	6.4	5.7	7.8	0	0	1	0	2		5.69293	7.61922	0	4.7887	14	103.33	0.538372	0.257722	19.4307	20.1202	19.9569	16.5789	18.9431	16.3093	19.5912	19.509	19.6344	20.1555	20.1473	20.4894
Color [DarkGray]	1	4	P05750	P05750	40S ribosomal protein S3	RPS3	RS3_YEAST 40S ribosomal protein S3 OS=Saccharomyces cerevisiae (strain ATCC 204508 / S288c) OX=559292 GN=RPS3 PE=1 SV=5	DYRPAEETEAQAEPVEA;ELAEEGYSGVEVR;FADGFLIHSGQPVNDFIDTATR;GLSAVAQAESMK;YAPGTIVLYAER	3	3	2	4	3	3	3	2	4	3	19.6	19.6	14.2	24.6	19.6	1	3	2	3	4		6.29702	7.76599	0	8.0385	29	26.502	1.05882	0.248647	20.946	20.6966	20.7136	20.2635	20.4229	20.5877	20.3982	20.5538	20.6582	20.7562	20.696	20.7933
Color [DarkGray]	1	4	P53378	P53378	Tubulin gamma chain	TUB4	TBG_YEAST Tubulin gamma chain OS=Saccharomyces cerevisiae (strain ATCC 204508 / S288c) OX=559292 GN=TUB4 PE=1 SV=1	NPNIDLQHTNQLISTIISSVTNSIR	0	0	1	1	0	0	0	1	1	0	0	0	5.3	5.3	0	0	0	1	0	0		5.10278	6.18196	0.0033557	1.8301	3	52.627	0.229627	0.24842	17.235	17.186	17.5811	15.1581	15.5991	17.1779	16.402	17.8046	17.0502	16.735	16.0709	16.8704
Color [DarkGray]	1	4	P00830	P00830	ATP synthase subunit beta, mitochondrial	ATP2	ATPB_YEAST ATP synthase subunit beta, mitochondrial OS=Saccharomyces cerevisiae (strain ATCC 204508 / S288c) OX=559292 GN=ATP2 PE=1 SV=2	AHGGFSVFTGVGER;DEEGQDVLLFIDNIFR;EMKETGVINLEGESK;ETGVINLEGESK;FLSQPFAVAEVFTGIPGK;FTQAGSEVSALLGR;GISELGIYPAVDPLDSK;IINVIGEPIDER;IINVIGEPIDERGPIK;IPSAVGYQPTLATDMGLLQER;KPIHADPPSFAEQSTSAEILETGIK;LKDTVASFK;LLDAAVVGQEHYDVASK;LRKPIHADPPSFAEQSTSAEILETGIK;SLQDIIAILGMDELSEQDKLTVER;TIAMDGTEGLVR;TVFIQELINNIAK;VLDTGGPISVPVGR;VQETLQTYK;YDNIPEHAFYMVGGIEDVVAK	9	6	17	12	10	9	6	17	12	10	26.4	19.4	46.6	32.9	28.8	5	6	17	7	10		7.08941	8.63815	0	79.465	142	54.793	2.73811	0.245954	21.9805	21.9859	21.9775	21.2591	21.3601	21.2319	21.7597	21.777	21.6693	21.3579	21.4512	21.3832
Color [DarkGray]	1	4	P32381	P32381	Actin-related protein 2	ARP2	ARP2_YEAST Actin-related protein 2 OS=Saccharomyces cerevisiae (strain ATCC 204508 / S288c) OX=559292 GN=ARP2 PE=1 SV=1	ETTALVESYELPDGR;MDPHNPIVLDQGTGFVK	1	1	1	2	2	1	1	1	2	2	3.8	3.8	3.8	8.2	8.2	1	2	1	1	3		6.22435	7.47963	0	10.189	17	44.073	0.328947	0.233613	21.1744	20.5717	20.232	20.2355	19.8949	20.1301	20.2536	20.5908	20.4329	20.2112	20.2424	20.1065
Color [DarkGray]	1	4	Q04491	Q04491	Protein transport protein SEC13	SEC13	SEC13_YEAST Protein transport protein SEC13 OS=Saccharomyces cerevisiae (strain ATCC 204508 / S288c) OX=559292 GN=SEC13 PE=1 SV=1	DVAWSPTVLLR;IFEVEGETHK;YNSDAQTYVLESTLEGHSDWVR	2	0	1	1	3	2	0	1	1	3	11.1	0	3.4	3.7	14.5	1	0	1	0	3		5.64778	7.06217	0	4.1718	14	33.043	0.692518	0.229221	19.3722	19.2982	19.4916	16.5428	18.8457	19.1342	19.3217	18.8799	19.2727	18.7543	19.3319	19.5961
Color [DarkGray]	1	4	P53549	P53549	26S protease subunit RPT4	RPT4	PRS10_YEAST 26S proteasome subunit RPT4 OS=Saccharomyces cerevisiae (strain ATCC 204508 / S288c) OX=559292 GN=RPT4 PE=1 SV=4	ALQSIGQLIGEVMK;AVAATIGANFIFSPASGIVDK;AVAATIGANFIFSPASGIVDKYIGESAR;EHEPCIIFMDEVDAIGGR;FSEGTSADREIQR;KLEGTIEYQKL;TLMELLTQMDGFDNLGQTK	3	1	5	3	4	3	1	5	3	4	9.6	4.1	19	10.3	12.1	0	1	5	1	3		6.06554	7.68083	0	16.637	25	49.408	0.207626	0.216839	20.5598	19.9083	21.0773	15.5467	20.224	19.9241	20.5243	20.5145	19.8561	20.9433	20.7615	20.3576
Color [DarkGray]	1	4	P22146	P22146	1,3-beta-glucanosyltransferase GAS1	GAS1	GAS1_YEAST 1,3-beta-glucanosyltransferase GAS1 OS=Saccharomyces cerevisiae (strain ATCC 204508 / S288c) OX=559292 GN=GAS1 PE=1 SV=2	DDPTWTVDLFNSYK;KIPVGYSSNDDEDTRVK	2	0	1	2	1	2	0	1	2	1	5.5	0	3	5.5	3	1	0	1	1	1		4.88335	7.42364	0.0019048	2.5615	16	59.582	0.28966	0.216522	21.1936	21.6915	20.9104	15.8032	20.2917	19.718	21.0533	21.3892	20.7035	20.0059	20.2069	16.2927
Color [DarkGray]	1	4	P23644	P23644	Mitochondrial import receptor subunit TOM40	TOM40	TOM40_YEAST Mitochondrial import receptor subunit TOM40 OS=Saccharomyces cerevisiae (strain ATCC 204508 / S288c) OX=559292 GN=TOM40 PE=1 SV=1	DVFLSQYFFTGLR;QSLELVNPGTVENLNK;SAPTPLAEASQIPTIPALSPLTAK	1	0	2	1	0	1	0	2	1	0	6.2	0	9.6	6.2	0	0	0	2	0	0		5.35854	6.53464	0	6.188	4	42.038	0.102632	0.190685	18.3334	16.3	16.7338	16.7305	17.694	17.4398	17.4305	16.6048	16.76	15.9564	15.8672	17.6559
Color [DarkGray]	1	4	P04840	P04840	Mitochondrial outer membrane protein porin 1	POR1	VDAC1_YEAST Mitochondrial outer membrane protein porin 1 OS=Saccharomyces cerevisiae (strain ATCC 204508 / S288c) OX=559292 GN=POR1 PE=1 SV=4	AKQPVKDGPLSTNVEAK;DYSLGATLNNEQITTVDFFQNVNAFLQVGAK;NELITSLTPGVAK;QLLRPGVTLGVGSSFDALK;SAVLNTTFTQPFFTAR;SPPVYSDISR;SPTFVGDLTMAHEGIVGGAEFGYDISAGSISR;YAMALSYFAK	4	4	7	5	6	4	4	7	5	6	19.8	19.8	47.7	26.5	30	2	3	7	3	4		7.04017	8.48893	0	29.469	57	30.428	1.31707	0.187539	22.2142	22.4074	22.3008	21.9057	21.7454	22.085	22.1687	22.1423	22.0487	21.9696	21.8359	22.0496
Color [DarkGray]	1	4	P41810	P41810	Coatomer subunit beta	SEC26	COPB_YEAST Coatomer subunit beta OS=Saccharomyces cerevisiae (strain ATCC 204508 / S288c) OX=559292 GN=SEC26 PE=1 SV=2	IQDINANNVGALEELTLDILR;VLNAEDLDVR	0	0	1	2	2	0	0	1	2	2	0	0	2.2	3.2	3.2	0	0	1	1	3		5.36992	7.04202	0.0095238	1.4818	14	109.02	0.0913482	0.177287	17.6594	19.0227	20.0144	16.9118	18.1472	16.8006	18.7435	18.5201	18.9012	19.1367	18.9472	19.0992
Color [DarkGray]	1	4	P25847	P25847	DNA mismatch repair protein MSH2	MSH2	MSH2_YEAST DNA mismatch repair protein MSH2 OS=Saccharomyces cerevisiae (strain ATCC 204508 / S288c) OX=559292 GN=MSH2 PE=1 SV=2	AIANEPEKENDNYLK;ECLVQDLTSNSNSNAEMQK;EQKHDDEDITLLYK;EYDKQQSALVR;FSDVSEER;GDFLIITGPNMGGK;GVSTFMVEILETASILK;HDDEDITLLYK;HDLVDYLIDQIELR;LLGDDLALSLPQK;LSLQEVNEGNIR;LVDKGDYYTVIGSDAIFVADSVYHTQSVLK;NMHVVAHIEK;QPLTNIDEINKR;SIANETNILQK;SSTRPELK;VEFNEELGK;YIELSTVK	1	16	1	0	0	1	16	1	0	0	0.8	21.4	0.8	0	0	0	15	0	0	0		6.22006	8.12225	0	42.833	51	108.88	0.222451	0.170747	16.6467	16.3352	16.8335	22.7898	22.8587	22.8846	16.7032	15.9106	16.6893	15.8934	17.6665	16.4276
Color [DarkGray]	1	4	P25294	P25294	Protein SIS1	SIS1	SIS1_YEAST Protein SIS1 OS=Saccharomyces cerevisiae (strain ATCC 204508 / S288c) OX=559292 GN=SIS1 PE=1 SV=1	DGDDLIYTLPLSFK;VQPVQPSQTSTYPGQGMPTPK;YKVDYPISLNDAQKR	1	1	2	2	2	1	1	2	2	2	4	4	9.9	8.2	8.2	1	0	2	1	2		6.1357	7.52924	0	58.496	19	37.59	0.603187	0.165453	20.4433	20.2558	20.2235	19.7338	19.8212	19.7928	20.1113	19.9829	20.3321	20.1664	20.0689	20.4788
Color [DarkGray]	1	4	P40303	P40303	Proteasome subunit alpha type-4	PRE6	PSA4_YEAST Proteasome subunit alpha type-4 OS=Saccharomyces cerevisiae (strain ATCC 204508 / S288c) OX=559292 GN=PRE6 PE=1 SV=1	ALSIFSPDGHIFQVEYALEAVKR;ARVEAQSHR;IDSHVVLSFSGLNADSR;LTLEDPVTVEYLTR;YTQSGGVRPFGVSTLIAGFDPR;YTQSGGVRPFGVSTLIAGFDPRDDEPK	3	2	3	1	3	3	2	3	1	3	19.7	12.2	20.9	5.5	19.3	0	0	3	0	2		6.149	7.56489	0	17.07	14	28.439	0.452722	0.162171	20.2977	19.7991	20.1056	20.2513	20.138	19.5034	19.8021	19.9708	19.9429	20.0031	19.9004	19.7051
Color [DarkGray]	1	4	P32496	P32496	26S proteasome regulatory subunit RPN12	RPN12	RPN12_YEAST 26S proteasome regulatory subunit RPN12 OS=Saccharomyces cerevisiae (strain ATCC 204508 / S288c) OX=559292 GN=RPN12 PE=1 SV=3	AWDLLQSGSQNISEFDSFTDILK;FHSELQYLDK;LISLYLLNLLSQNNTTK	0	0	1	1	1	0	0	1	1	1	0	0	3.6	8.4	8.4	0	0	0	0	0		5.79763	7.00173	0	4.9668	6	31.919	0.0346098	0.152507	16.0771	19.2318	19.7211	17.3451	16.7769	15.6714	19.2358	16.2793	19.0574	19.1899	19.773	19.1305
Color [DarkGray]	1	4	P18759	P18759	Vesicular-fusion protein SEC18	SEC18	SEC18_YEAST Vesicular-fusion protein SEC18 OS=Saccharomyces cerevisiae (strain ATCC 204508 / S288c) OX=559292 GN=SEC18 PE=1 SV=2	EDFLNALNDVTPAFGISEEDLK;FEDLGVGGLDKEFTK;HDEDPVNELVELMTQSA;LQIFDIQTK;NFSGAEIEGLVK;NVQAIDLGDIEPTSAVATGIETK	3	1	4	3	3	3	1	4	3	3	7.5	3	8.7	6.5	7.5	0	1	1	2	1		5.62696	7.31353	0	17.007	17	84.055	0.865191	0.152437	19.6066	19.5773	19.7142	15.6559	16.3985	17.876	19.5924	19.4985	19.3499	19.6785	19.4567	19.1189
Color [DarkGray]	1	4	P33297	P33297	26S protease regulatory subunit 6A	RPT5	PRS6A_YEAST 26S proteasome regulatory subunit 6A OS=Saccharomyces cerevisiae (strain ATCC 204508 / S288c) OX=559292 GN=RPT5 PE=1 SV=3	AQILQIHSR;DSYLILDTLPSEFDSR;EKAPTIIFIDELDAIGTK;TMLELLNQLDGFSSDDRVK	3	3	3	4	3	3	3	3	4	3	9.9	9.9	9.9	14.3	12.2	1	0	3	2	3		5.82109	7.54205	0	11.357	36	48.255	1.03122	0.148252	19.7546	19.6454	19.7948	19.4226	19.4979	18.9251	19.6841	19.5416	19.5243	19.4923	19.2672	19.9151
Color [DarkGray]	1	4	P39517	P39517	ATP-dependent RNA helicase DHH1	DHH1	DHH1_YEAST ATP-dependent RNA helicase DHH1 OS=Saccharomyces cerevisiae (strain ATCC 204508 / S288c) OX=559292 GN=DHH1 PE=1 SV=1	ELALQTSQVVR;ELLMGIFEAGFEKPSPIQEEAIPVAITGR;GITQYYAFVEER;GNTFEDFYLKR;GSINNNFNTNNNSNTDLDRDWK;IEQELGTEIAAIPATIDK;IQALIMVPTR;KDTRPQTDDVLNTK;KITDLGYSCYYSHAR;TAAFVIPTLEK;TAETYLHR	3	4	5	3	6	3	4	5	3	6	10.7	12.8	15.2	10.1	16.4	0	3	3	0	7		6.35664	8.04914	0	39.566	57	57.543	0.146895	0.140893	20.5621	21.7281	21.4911	21.5383	21.7086	20.5731	21.0732	21.1246	21.1607	21.5775	21.5489	21.5368
Color [DarkGray]	1	4	P38314	P38314	Protein SDS24	SDS24	SDS24_YEAST Protein SDS24 OS=Saccharomyces cerevisiae (strain ATCC 204508 / S288c) OX=559292 GN=SDS24 PE=1 SV=1	DSFPIFHVYPSSSLAR;ISSIAVIDK;LIFVPGSISVEEAFNTLIK;LIGVVSLTDIINLLAR;LSAVPMTQTPSQCLSCVHAQK;QGNLLGNISVTDVK;SFTSLEPLLNSSLQDLHIGVLNIQSKPTSR	1	0	4	3	3	1	0	4	3	3	2.7	0	15.4	12.3	12.3	1	0	1	2	1		5.8185	7.37335	0	16.383	17	57.187	0.156476	0.129534	19.3014	19.2019	19.7392	16.3621	18.8403	19.2642	19.7775	18.8823	19.1941	19.8762	19.4648	18.895
Color [DarkGray]	1	4	P40302	P40302	Proteasome subunit alpha type-6	PRE5	PSA6_YEAST Proteasome subunit alpha type-6 OS=Saccharomyces cerevisiae (strain ATCC 204508 / S288c) OX=559292 GN=PRE5 PE=1 SV=1	AGVEAISQSLRDESLTVDNLSIAIVGK;DTPFTIYDGEAVAK;LFQVEYALEAIK;NADELSSYQK;NADELSSYQKK;NNYDGDTVTFSPTGR;SGAHLLEFQPSGNVTELYGTAIGAR	3	5	6	4	3	3	5	6	4	3	20.1	37.6	44	26.9	20.1	3	4	6	2	2		6.60271	8.12307	0	17.916	47	25.604	0.4059	0.115053	21.7957	21.9226	21.8346	21.5963	21.2973	21.0568	21.59	21.9611	21.6567	21.7175	21.5641	21.5562
Color [DarkGray]	1	4	Q06506	Q06506	Ribosomal RNA-processing protein 9	RRP9	RRP9_YEAST Ribosomal RNA-processing protein 9 OS=Saccharomyces cerevisiae (strain ATCC 204508 / S288c) OX=559292 GN=RRP9 PE=1 SV=1	LIVWSTESLSPVK;TIDEYNNFDAGDLDKDIIASR;VGENNLTCISCFQPVLNK	0	2	0	0	1	0	2	0	0	1	0	6.8	0	0	3.7	0	3	0	0	0		4.99596	7.04372	0	6.3604	11	65.053	0.0891711	0.106836	16.235	17.1915	17.5769	20.8165	21.1822	20.4829	16.7158	17.1921	16.775	18.659	17.2028	19.8445
Color [DarkGray]	1	4	P40562	P40562	ATP-dependent DNA helicase MPH1	MPH1	MPH1_YEAST ATP-dependent DNA helicase MPH1 OS=Saccharomyces cerevisiae (strain ATCC 204508 / S288c) OX=559292 GN=MPH1 PE=1 SV=1	AMEDYSTLQALISK;DLHDNVLPGQK;DVSFGPTHHELDYDALSFYVYPTNYEVR	0	3	0	0	0	0	3	0	0	0	0	5.3	0	0	0	0	2	0	0	0		5.18395	6.90033	0	3.635	5	114.06	0.0646222	0.0752385	16.6593	17.1612	15.8183	20.1596	20.2931	20.297	16.6389	16.4926	16.2817	16.926	15.586	16.8315
Color [DarkGray]	1	4	Q12377	Q12377	26S proteasome regulatory subunit RPN6	RPN6	RPN6_YEAST 26S proteasome regulatory subunit RPN6 OS=Saccharomyces cerevisiae (strain ATCC 204508 / S288c) OX=559292 GN=RPN6 PE=1 SV=3	DSLALINDLLR;SLPGSKLEEAR;TAFSYFFESFESYHNLTTHNSYEK	0	0	1	1	1	0	0	1	1	1	0	0	2.5	2.5	2.5	0	0	1	0	1		5.36165	6.75845	0.003643	2.274	10	49.773	0.0403736	0.0635993	17.219	17.5471	18.1017	16.1572	15.8121	16.5755	17.883	18.1608	16.6333	18.2812	17.6392	18.1964
Color [DarkGray]	1	4	P46367;P40047	P46367	Potassium-activated aldehyde dehydrogenase, mitochondrial	ALD4	ALDH4_YEAST Potassium-activated aldehyde dehydrogenase, mitochondrial OS=Saccharomyces cerevisiae (strain ATCC 204508 / S288c) OX=559292 GN=ALD4 PE=1 SV=2	AISSSRGDVDLVINYLK;EDDVEEAVQAADR;EMSVDALQNYLQVK;GDVDLVINYLK;GYFIKPTVFGDVK;HIYQSAAAGLK;IAPALVTGNTVVLK;IVGEAITNHPK;IVKEEIFGPVVTVTK;KVTLELGGK;LAELIEQDKDVIASIETLDNGK;MFSRSTLCLKTSASSIGR;SADEVINMANDSEYGLAAGIHTSNINTALK;SPNIVFADAELKK;TAESTPLSALYVSK;TFEVINPSTEEEICHIYEGREDDVEEAVQAADR;VAFTGSTATGR;VGDPFDESTFQGAQTSQMQLNK;VNAGTVWINTYNDFHHAVPFGGFNASGLGR;VTLELGGK;VYVEESIYDKFIEEFK;YIPQAGIPPGVINIVSGFGK;YVDIGKNEGATL…	19	16	21	19	21	19	16	21	19	21	51.1	44.3	58.4	54.7	64.2	12	13	25	21	24		7.52999	9.19279	0	323.31	275	56.723	0.517971	0.0545038	23.2183	23.3367	23.3667	23.0097	22.8992	22.9228	23.2398	23.2483	23.2701	23.1077	22.9882	23.15
Color [DarkGray]	1	4	P07283	P07283	Phosphomannomutase	SEC53	PMM_YEAST Phosphomannomutase OS=Saccharomyces cerevisiae (strain ATCC 204508 / S288c) OX=559292 GN=SEC53 PE=1 SV=1	EKPETLVLFDVDGTLTPAR;TIGHSVQSPDDTVK	0	0	1	0	1	0	0	1	0	1	0	0	7.5	0	7.5	0	0	0	0	2		5.57191	6.80236	0	2.9646	7	29.063	0.0141002	0.0431792	17.4943	17.4853	18.0067	18.207	17.7551	17.7444	16.193	19.5429	17.1208	19.7174	19.3849	16.0545
Color [DarkGray]	1	4	P43621	P43621	Coatomer subunit delta	RET2	COPD_YEAST Coatomer subunit delta OS=Saccharomyces cerevisiae (strain ATCC 204508 / S288c) OX=559292 GN=RET2 PE=1 SV=3	VLELLSNFQNLVSEISSDHTFVEDK	0	0	1	0	0	0	0	1	0	0	0	0	4.6	0	0	0	0	1	0	0		4.85961	6.13837	0.0018939	2.5359	4	60.627	0.0124428	0.0419242	17.6127	16.0706	15.8341	15.7425	16.8336	15.4345	14.5553	17.1921	17.6441	16.5588	16.3012	16.4593
Color [DarkGray]	1	4	P32939	P32939	GTP-binding protein YPT7	YPT7	YPT7_YEAST GTP-binding protein YPT7 OS=Saccharomyces cerevisiae (strain ATCC 204508 / S288c) OX=559292 GN=YPT7 PE=1 SV=1	EVTVDGDKVATMQVWDTAGQER;FQSLGVAFYR;GADCCVLVYDVTNASSFENIK;NAINVDTAFEEIAR;SALQQNQADTEAFEDDYNDAINIR;SLGDIPLFLTSAK;VATMQVWDTAGQER;VIILGDSGVGK;YVNDKYSQQYK	6	6	6	7	6	6	6	6	7	6	44.7	38.5	45.2	43.8	41.8	7	5	10	7	5		7.33439	8.5523	0	323.31	114	23.042	0.224674	0.039711	22.2128	22.1686	22.3113	21.4887	21.4497	21.3835	22.0936	22.1971	22.2828	21.8558	21.9569	21.9803
Color [DarkGray]	1	4	P15565	P15565	tRNA (guanine(26)-N(2))-dimethyltransferase, mitochondrial	TRM1	TRM1_YEAST tRNA (guanine(26)-N(2))-dimethyltransferase, mitochondrial OS=Saccharomyces cerevisiae (strain ATCC 204508 / S288c) OX=559292 GN=TRM1 PE=1 SV=1	AEILFPKK;ANFTAYGAPR;AWDNLYGEECGQK;EAVGNSNRNEPYINILEALSATGLR;EFIEEVLR;ETVFYNPIQQFNR;INIEDFNIVK;INIEDFNIVKEGK;KETVFYNPIQQFNR;LSFAPNEQSGNIEK;NELSDSPFYFSPNHIASVIK;NEPYINILEALSATGLR;NVEYNSVENIVKPNLDDANVLMYR;TNAPWDAIWYVMQK;VVAGLGSLGFECSLTHAQPSSLK;YSVAQGPPVDTK	4	13	0	0	1	4	13	0	0	1	11.6	28.8	0	0	4	0	14	0	0	1		6.27333	8.06919	0	35.575	46	64.052	0.0214876	0.0387726	17.1137	15.3158	16.9874	22.6887	22.9635	22.7265	16.3447	16.7494	16.2064	17.5587	15.8377	15.3948
Color [DarkGray]	1	4	P21576	P21576	Vacuolar protein sorting-associated protein 1	VPS1	VPS1_YEAST Vacuolar protein sorting-associated protein 1 OS=Saccharomyces cerevisiae (strain ATCC 204508 / S288c) OX=559292 GN=VPS1 PE=1 SV=2	AEQTYINTAHPDLLK;AHYCGTPYLAK;DATIPTNEFVVDIIK;EAISNQFIQFLK;ELSSQELSGGAR;IYSPHVLTLTLVDLPGLTK;KFFENHPSYSSK;LVTLVFDELVR;NASQIVSSV;NGVDSLDPFDQIKDSDIR;VDLMDQGTDVIDILAGR;YGYIPVINR;YISKPNAIILSVNAANTDLANSDGLK	6	8	11	8	10	6	8	11	8	10	11.4	15.9	23.9	16.1	21.3	2	5	8	7	9		6.34803	8.20577	0	33.744	102	78.736	0.186256	0.0385564	20.8442	20.9596	21.0362	20.7209	21.1895	21.1046	21.0107	20.818	20.8957	21.1826	20.9748	20.7529
Color [DarkGray]	1	4	P33298	P33298	26S protease regulatory subunit 6B homolog	RPT3	PRS6B_YEAST 26S proteasome regulatory subunit 6B homolog OS=Saccharomyces cerevisiae (strain ATCC 204508 / S288c) OX=559292 GN=RPT3 PE=1 SV=2	ENAPSIIFIDEVDSIATK;ENAPSIIFIDEVDSIATKR;EYELLTLQEDYIKDEQR;MSLAPEADLDSLIIR;NDSLSGAVIAAIMQEAGLR	2	1	4	3	4	2	1	4	3	4	8.2	4.4	12.9	12.1	16.1	0	1	3	1	2		6.06483	7.61747	0	8.5326	27	47.893	0.0336263	0.0369352	19.1752	18.4914	19.5683	17.4288	19.8467	18.4302	19.3834	19.0386	18.7022	19.5132	19.8867	19.124
Color [DarkGray]	1	4	P21242	P21242	Probable proteasome subunit alpha type-7	PRE10	PSA7_YEAST Probable proteasome subunit alpha type-7 OS=Saccharomyces cerevisiae (strain ATCC 204508 / S288c) OX=559292 GN=PRE10 PE=1 SV=2	GDLLQEAIDFAQK;NFQVEYAVK;TSIGTGYDLSNSVFSPDGR	2	2	2	2	2	2	2	2	2	2	11.1	11.1	11.1	11.1	11.1	1	1	2	1	0		6.16277	7.30891	0	6.2409	19	31.536	0.0614842	0.0352688	19.2598	19.5694	19.3535	19.0226	19.0506	18.9712	19.7001	19.2683	19.1085	19.3638	18.9225	19.2411
Color [DarkGray]	1	4	P32445	P32445	Single-stranded DNA-binding protein RIM1, mitochondrial	RIM1	RIM1_YEAST Single-stranded DNA-binding protein RIM1, mitochondrial OS=Saccharomyces cerevisiae (strain ATCC 204508 / S288c) OX=559292 GN=RIM1 PE=1 SV=1	DDGSKGTTLSLVQK;DGQTNWYNITVFNEPQINFLTEYVR;DGQTNWYNITVFNEPQINFLTEYVRK;GALVYVEADAANYVFER;GALVYVEADAANYVFERDDGSK;GALVYVEADAANYVFERDDGSKGTTLSLVQK;GTTLSLVQK;IGSEFTEHTSANNNR;KGALVYVEADAANYVFER;KGALVYVEADAANYVFERDDGSK;KLEDAEGQENAASSE;LEDAEGQENAASSE;RDGQTNWYNITVFNEPQINFLTEYVR;RDGQTNWYNITVFNEPQINFLTEYVRK;YSIASQPR	1	15	0	0	0	1	15	0	0	0	11.1	71.1	0	0	0	0	29	0	0	0		8.36614	9.41596	0	323.31	87	15.386	0.0102753	0.0284726	15.4552	16.4274	18.1705	27.6449	27.6783	27.5463	17.0255	15.7597	17.1824	17.1547	17.0766	17.252
Color [DarkGray]	1	4	P40016	P40016	26S proteasome regulatory subunit RPN3	RPN3	RPN3_YEAST 26S proteasome regulatory subunit RPN3 OS=Saccharomyces cerevisiae (strain ATCC 204508 / S288c) OX=559292 GN=RPN3 PE=1 SV=5	ASTAVMMDVDSSGVNDLHHSEK;INHEDGFIETTELLNIYDSEDPQQVFDER;SLLPYYHLTK;SSEEINSDNQNIILR;YAEEDQVQELLK	2	1	4	3	3	2	1	4	3	3	5.2	2.3	12.6	7.1	7.1	0	1	3	2	1		5.81127	7.38303	0	23.961	24	60.392	0.0234591	0.0235246	19.7548	19.7952	19.131	15.643	19.5885	19.0848	20.0085	19.1235	19.4784	19.4577	19.0228	19.0981
Color [DarkGray]	1	4	P38555	P38555	GTP-binding protein YPT31/YPT8	YPT31	YPT31_YEAST GTP-binding protein YPT31/YPT8 OS=Saccharomyces cerevisiae (strain ATCC 204508 / S288c) OX=559292 GN=YPT31 PE=1 SV=3	AQIWDTAGQER;ENADDNVAVGLIGNK;GAVGALIVYDISK;IKAQIWDTAGQER;IVLIGDSGVGK;NEFNMDSK;SSEDYGYDYDLLFK;SSSYENCNHWLSELRENADDNVAVGLIGNK;TLEIDGKR	6	6	6	8	6	2	2	2	3	3	32.3	28.3	32.3	39.9	34.1	2	4	5	6	4		7.02841	8.22144	0	24.766	61	24.469	0.0870622	0.0172024	21.7668	21.7106	21.6906	21.5835	21.4196	21.3989	21.8241	21.6975	21.5947	21.5097	21.5401	21.4473
Color [DarkGray]	1	4	P09733	P09733	Tubulin alpha-1 chain	TUB1	TBA1_YEAST Tubulin alpha-1 chain OS=Saccharomyces cerevisiae (strain ATCC 204508 / S288c) OX=559292 GN=TUB1 PE=1 SV=2	AFHESNSVSEITNACFEPGNQMVK;AIYVDLEPNVIDEVR;EILGDVLDR;FDGSLNVDLNEFQTNLVPYPR;GGEEGFSTFFHETGYGK;IGICYEPPTATPNSQLATVDR;TVQLVDWCPTGFK	3	2	7	4	4	1	1	4	2	2	9.2	5.8	26.8	13.9	12.1	4	1	4	4	3		6.66469	8.28547	0	132.78	53	49.799	0.016554	0.00679652	22.5128	22.445	22.8512	22.1976	22.3193	22.453	22.6473	22.491	22.6504	22.4451	22.3708	22.4452
Color [DarkGray]	1	4	P00549	P00549	Pyruvate kinase 1	CDC19	KPYK1_YEAST Pyruvate kinase 1 OS=Saccharomyces cerevisiae (strain ATCC 204508 / S288c) OX=559292 GN=CDC19 PE=1 SV=2	ACDDKIMYVDYK;AEVSDVGNAILDGADCVMLSGETAK;AGAGHSNTLQVSTV;AIIVLSTSGTTPR;AKEFGILK;EPVSDWTDDVEAR;EVLGEQGKDVK;GDLGIEIPAPEVLAVQK;GDLGIEIPAPEVLAVQKK;GDTYVSIQGFK;GNYPINAVTTMAETAVIAEQAIAYLPNYDDMR;GVFPFVFEKEPVSDWTDDVEAR;GVNLPGTDVDLPALSEK;GVNLPGTDVDLPALSEKDKEDLR;IENQQGVNNFDEILK;IENQQGVNNFDEILKVTDGVMVAR;IIYVDDGVLSFQVLEVVDDKTLK;KAGLNIVR;KGDTYVSIQGFK;KSEELYPGRPLAIALDTK;LTSLNVVAGSDLR;LTSLNVVAGSDLRR;MNFSHGSYEYHK;N…	30	29	35	31	35	28	27	33	29	33	74.2	75.2	83.2	78	84.4	29	28	65	34	41		8.09191	9.77357	0	302.44	620	54.544	0.144125	0.00468826	24.2616	24.2447	24.2809	23.4927	23.4625	23.4961	24.2654	24.2458	24.262	24.189	24.195	24.2368
Color [DarkGray]	1	4	P38219	P38219	Obg-like ATPase 1	OLA1	OLA1_YEAST Obg-like ATPase 1 OS=Saccharomyces cerevisiae (strain ATCC 204508 / S288c) OX=559292 GN=OLA1 PE=1 SV=1	CPLGNPANYPFATIDPEEAR;GASAGEGLGNAFLSHIR;GKDYVVEDGDIIYFR;VLLGRPGNNLK	1	2	3	1	2	1	2	3	1	2	4.3	8.1	13.2	4.3	8.1	1	1	3	2	2		5.00758	7.52665	0	6.18	22	44.174	0.0448259	-0.0157668	20.1316	20.209	20.3014	19.5547	19.9078	19.4962	20.0466	20.2168	20.4258	20.4589	20.2302	20.4749
Color [DarkGray]	1	4	Q03834	Q03834	DNA mismatch repair protein MSH6	MSH6	MSH6_YEAST DNA mismatch repair protein MSH6 OS=Saccharomyces cerevisiae (strain ATCC 204508 / S288c) OX=559292 GN=MSH6 PE=1 SV=1	AINENIIVPQR;DALLANALFDLK;FNSAPNAIFNEVK;LGANDNIMQGK;LGLLTGANAAGK;LGSGEGVLNYDWNIKR;MSILVDEATR	0	4	0	0	0	0	4	0	0	0	0	4.2	0	0	0	0	4	0	0	0		5.27681	7.25288	0	7.473	16	140.08	0.014998	-0.0231673	18.0021	17.6452	17.1123	20.5899	20.4698	20.4285	17.0644	17.2809	18.4839	16.8368	16.9082	16.7411
Color [DarkGray]	1	4	Q99383	Q99383	Nuclear polyadenylated RNA-binding protein 4	HRP1	HRP1_YEAST Nuclear polyadenylated RNA-binding protein 4 OS=Saccharomyces cerevisiae (strain ATCC 204508 / S288c) OX=559292 GN=HRP1 PE=1 SV=1	AGSGTSQLDQLAALQALSSSLNK;AIPRDEQDKTGK;GFGFLSFEKPSSVDEVVK;GFGFVTYDSADAVDR;GFGFVTYDSADAVDRVCQNK;GPSQYNDDHNSGYGYNR;GPSQYNDDHNSGYGYNRDR;IFVGGIGPDVRPK;MFIGGLNWDTTEDNLREYFGK;MQEYYQQMQK;NDRDRDYNHR;QDGTANDKEGSNEDTKNEK;SNDVQTIGNTSNTDSGSPPLNLPNGPK;TQHILDGK;YGTVTDLK	9	10	12	11	14	9	10	12	11	14	24.2	26.8	31.8	27.9	37.5	16	20	17	23	22		8.22407	9.78757	0	323.31	303	59.649	0.173013	-0.0329132	26.8166	26.6339	26.8548	26.9986	26.7123	27.0213	26.843	26.7986	26.7626	26.8053	26.7029	26.8791
Color [DarkGray]	1	4	P32861	P32861	UTP--glucose-1-phosphate uridylyltransferase	UGP1	UGPA1_YEAST UTP--glucose-1-phosphate uridylyltransferase OS=Saccharomyces cerevisiae (strain ATCC 204508 / S288c) OX=559292 GN=UGP1 PE=1 SV=1	AKFENELDSFFTLFR;EILFVSNGDNLGATVDLK;GTVIIVCSDGHK;HFDGAHGVVVPR;THSTYAFESNTNSVAASQMR	1	1	2	1	5	1	1	2	1	5	2.4	2.4	5.4	2.4	15.4	0	0	0	0	4		6.379	7.79398	0	3.8397	8	55.987	0.234348	-0.0412375	21.6959	21.7733	21.7917	21.7293	21.6237	21.7469	21.7571	21.7104	21.9171	21.373	21.784	21.4449
Color [DarkGray]	1	4	P25349	P25349	Flavoprotein-like protein YCP4	YCP4	YCP4_YEAST Flavoprotein-like protein YCP4 OS=Saccharomyces cerevisiae (strain ATCC 204508 / S288c) OX=559292 GN=YCP4 PE=1 SV=1	AAGIFVSTSSYGGGQESTVK	0	0	1	1	0	0	0	1	1	0	0	0	8.1	8.1	0	0	0	1	1	0		5.17234	6.37645	0.0097245	1.5588	8	26.35	0.0197478	-0.0420399	17.295	16.3924	18.3338	16.8739	15.7897	16.5736	17.4065	16.6202	18.1206	16.2903	16.715	16.212
Color [DarkGray]	1	4	P40043	P40043	Respiratory growth induced protein 1	RGI1	RGI1_YEAST Respiratory growth induced protein 1 OS=Saccharomyces cerevisiae (strain ATCC 204508 / S288c) OX=559292 GN=RGI1 PE=1 SV=1	HLHQHIEK;ISDAANSHSKK;SKEETFDK;VQTVTTEDGETVK	2	1	2	1	1	2	1	2	1	1	14.9	8.1	14.9	8.1	8.1	0	0	1	1	1		6.4071	8.55906	0	14.336	18	18.989	0.080555	-0.0474091	24.6632	24.7291	24.422	23.545	16.2053	23.6073	24.3364	24.9792	24.641	24.9078	24.8195	25.4218
Color [DarkGray]	1	4	P02994	P02994	Elongation factor 1-alpha	TEF1	EF1A_YEAST Elongation factor 1-alpha OS=Saccharomyces cerevisiae (strain ATCC 204508 / S288c) OX=559292 GN=TEF1 PE=1 SV=1	EHALLAFTLGVR;ETSNFIKK;FDELLEKNDR;FDELLEKNDRR;FQEIVKETSNFIK;FQEIVKETSNFIKK;FVPSKPMCVEAFSEYPPLGR;GCASFNATVIVLNHPGQISAGYSPVLDCHTAHIACR;IGGIGTVPVGR;KLEDHPK;KVGYNPK;LPLQDVYK;MDSVKWDESR;NDPPKGCASFNATVIVLNHPGQISAGYSPVLDCHTAHIACR;NMITGTSQADCAILIIAGGVGEFEAGISK;NMITGTSQADCAILIIAGGVGEFEAGISKDGQTR;QLIVAVNK;QLIVAVNKMDSVK;QLIVAVNKMDSVKWDESR;QTVAVGVIK;RGNVCGDAKNDPPK;SGDAALVK;SHINVVVIGHVDSGK;SVEMHHEQLEQGVPGDNVGF…	23	27	27	26	26	23	27	27	26	26	64	71.6	69.9	67	69.7	34	50	56	51	67		8.39534	10.0946	0	323.31	804	50.032	0.405053	-0.0496025	25.9959	26.0764	26.1414	26.0099	25.9942	25.9284	26.0766	26.1068	26.1791	26.2477	26.3172	26.2953
Color [DarkGray]	1	4	P48445	P48445	Biotin--protein ligase;Biotin--[methylmalonyl-CoA-carboxytransferase] ligase;Biotin--[propionyl-CoA-carboxylase [ATP-hydrolyzing]] ligase;Biotin--[methylcrotonoyl-CoA-carboxylase] ligase;Biotin--[acetyl-CoA-carboxylase] ligase	BPL1	BPL1_YEAST Biotin--protein ligase OS=Saccharomyces cerevisiae (strain ATCC 204508 / S288c) OX=559292 GN=BPL1 PE=1 SV=1	AEKLQALYMNNLEVILK;AILSYAPGFSDIPVR;APNLTPLFMASAPNK;APNLTPLFMASAPNKR;ASYDAASSSLLHK;ASYDAASSSLLHKEPDEVPK;DFLEPYYAVSTVNVK;DFLEPYYAVSTVNVKVLQTEPWMSK;ELVSGSSTQFTGNVYNLQPDGNTFDIFK;ELVSGSSTQFTGNVYNLQPDGNTFDIFKSLIAK;EYFKYLNVQNTIGSLLLYGEVVTSTSTILNNNK;FDNVEILATYAEHPDVPSSDSGK;FDNVEILATYAEHPDVPSSDSGKGQSENPAAVVLCTVGR;GGNTWINPK;GGNTWINPKGVCASTAVVTMPLQSPVTNR;GKVLLTGPHPEFNVR;GKVLLTGPHPEFNVRFMR;GPAYNGFQYNSEAGAR;GQ…	53	56	55	56	54	53	56	55	56	54	73.8	75.5	75.1	74.5	72.8	387	481	499	550	614		10.2522	12.0645	0	323.31	8134	76.362	0.512481	-0.0601629	32.1557	32.3043	32.3065	32.1867	32.2133	32.2121	32.3005	32.3405	32.3061	32.099	32.0795	32.0765
Color [DarkGray]	1	4	P31383	P31383	Protein phosphatase PP2A regulatory subunit A	TPD3	2AAA_YEAST Protein phosphatase PP2A regulatory subunit A OS=Saccharomyces cerevisiae (strain ATCC 204508 / S288c) OX=559292 GN=TPD3 PE=1 SV=3	FDLQLLENFVSR;VVNDVIGIELLSDSLLPAITELAK	0	0	2	0	2	0	0	2	0	2	0	0	5.7	0	5.7	0	0	3	0	1		4.74314	6.1745	0.0036232	2.2289	5	70.907	0.0568813	-0.0625776	17.0081	16.7744	16.2768	17.512	17.034	15.1556	16.9046	16.1459	17.1965	17.1007	18.4666	16.3552
Color [DarkGray]	1	4	P41807	P41807	V-type proton ATPase subunit H	VMA13	VATH_YEAST V-type proton ATPase subunit H OS=Saccharomyces cerevisiae (strain ATCC 204508 / S288c) OX=559292 GN=VMA13 PE=1 SV=1	ATDSQLATR;EILENEYQELTSFDEYVAELDSK;FFQEDPKQLEQLFDVSLK;ILMDSTHFNEIR;LLQELAVIPEYR;NIGDGLSSSNNAHSGFK;QLIELLQAK;QLLLLGNALPTVQSLSER;SEELSEIDASTAK;SVQNLIAELLSSDKYGDDTVK;YLSDFLDLLK	7	6	9	8	8	7	6	9	8	8	22.2	20.1	27.6	25.1	25.7	4	2	7	4	5		6.64667	8.19315	0	30.487	82	54.415	0.290466	-0.0644379	21.1825	21.1814	20.9776	20.7946	21.0278	20.6331	21.2042	21.264	21.0667	20.8739	21.1688	20.8842
Color [DarkGray]	1	4	P38701	P38701	40S ribosomal protein S20	RPS20	RS20_YEAST 40S ribosomal protein S20 OS=Saccharomyces cerevisiae (strain ATCC 204508 / S288c) OX=559292 GN=RPS20 PE=1 SV=3	EKVEEQEQQQQQIIK;NAEQHNLVK;VEEQEQQQQQIIK;YIDLEAPVQIVK;YIDLEAPVQIVKR	4	4	4	5	4	4	4	4	5	4	30.6	30.6	23.1	30.6	23.1	6	2	5	5	5		7.07591	8.14273	0	323.31	58	13.907	0.17569	-0.0660553	22.3837	22.1114	22.0747	21.4697	21.5691	21.7311	22.1633	22.4638	22.1408	21.8915	21.9165	21.725
Color [DarkGray]	1	4	P53312	P53312	Succinyl-CoA ligase [ADP-forming] subunit beta, mitochondrial	LSC2	SUCB_YEAST Succinate--CoA ligase [ADP-forming] subunit beta, mitochondrial OS=Saccharomyces cerevisiae (strain ATCC 204508 / S288c) OX=559292 GN=LSC2 PE=1 SV=1	DATQVEINPLSEIEHDPTHK;DLSQEDPDEVKAK;EYGIGTPEGFPAFTPEEAFEAAK;FGFDDNASFRQEK;KPMIIASSQGGMNIEEVAER;NVDAIFVNIFGGIVR;SLGFSPDAQDEAAK	5	4	4	5	7	5	4	4	5	7	19.4	16.4	16.6	19.4	27.6	2	2	3	5	8		6.27471	8.07719	0	16.839	57	46.9	0.250063	-0.0787417	21.7001	21.6105	21.6793	20.9875	21.2371	21.1045	21.5176	21.9364	21.772	21.4801	21.3807	21.3331
Color [DarkGray]	1	4	P09734	P09734	Tubulin alpha-3 chain	TUB3	TBA3_YEAST Tubulin alpha-3 chain OS=Saccharomyces cerevisiae (strain ATCC 204508 / S288c) OX=559292 GN=TUB3 PE=1 SV=1	AIYVDLEPNVIDEVR;FDGSLNVDLNEFQTNLVPYPR;GGEEGFSTFFHETGYGK;IGICYEPPSVIPSSELANVDR;IHFPLVSYAPILSK	2	1	2	1	1	2	1	2	1	1	15.1	8.5	19.8	11.9	11.9	1	1	2	1	1		6.05519	7.41956	0	3.6636	19	49.693	0.172315	-0.0877705	20.5243	20.1593	20.4399	19.9744	19.7367	20.1188	20.1503	20.6625	20.574	20.0171	20.5117	20.1963
Color [DarkGray]	1	4	Q02866	Q02866	Protein MUK1	MUK1	MUK1_YEAST Protein MUK1 OS=Saccharomyces cerevisiae (strain ATCC 204508 / S288c) OX=559292 GN=MUK1 PE=1 SV=1	DIFLNAEFIR;FLSLNNGIDPEPK;ILENSISSR;ILIVGTSVSSPNK;LIDIFIDDLKQPK;NTTGGMQFQQNLHEDQNDNER;SYTPPHPNNTSNNNLHSSNNLNIPR;TFKPHQLQTFK	5	4	7	7	8	5	4	7	7	8	9.5	7	14.7	14.7	18.8	0	2	7	8	6		6.2445	8.00424	0	21.006	67	69.538	0.401872	-0.0898221	20.8159	20.9734	20.8029	20.0439	20.4629	20.7995	21.0876	20.8203	20.9537	20.7434	20.419	20.6804
Color [DarkGray]	1	4	P20436	P20436	DNA-directed RNA polymerases I, II, and III subunit RPABC3	RPB8	RPAB3_YEAST DNA-directed RNA polymerases I, II, and III subunit RPABC3 OS=Saccharomyces cerevisiae (strain ATCC 204508 / S288c) OX=559292 GN=RPB8 PE=1 SV=1	SNTLFDDIFQVSEVDPGR	0	1	1	1	1	0	1	1	1	1	0	12.3	12.3	12.3	12.3	0	0	1	1	1		5.52626	6.3044	0.009539	1.4848	7	16.511	0.0635374	-0.0960687	18.2256	17.0801	16.9725	16.8488	15.8085	15.4854	18.0495	17.6305	16.8866	17.5892	17.9072	17.4614
Color [DarkGray]	1	4	P01123	P01123	GTP-binding protein YPT1	YPT1	YPT1_YEAST GTP-binding protein YPT1 OS=Saccharomyces cerevisiae (strain ATCC 204508 / S288c) OX=559292 GN=YPT1 PE=1 SV=2	EFADANKMPFLETSALDSTNVEDAFLTMAR;ESMSQQNLNETTQK;FSDDTYTNDYISTIGVDFK;GSHGIIIVYDVTDQESFNGVK;IKTVELDGK;LLLIGNSGVGK;MNSEYDYLFK;MPFLETSALDSTNVEDAFLTMAR;MWLQEIDR;MWLQEIDRYATSTVLK;TITSSYYR;VVEYDVAKEFADANK;YATSTVLK	10	12	9	12	11	10	12	9	12	11	63.6	67	57.8	67	63.6	5	11	14	13	14		7.72563	8.93533	0	237.06	194	23.214	1.54557	-0.0966924	23.3213	23.26	23.2787	22.9514	23.1256	23.1906	23.3691	23.4273	23.3537	23.0831	23.1481	23.0694
Color [DarkGray]	1	4	P19262	P19262	Dihydrolipoyllysine-residue succinyltransferase component of 2-oxoglutarate dehydrogenase complex, mitochondrial	KGD2	ODO2_YEAST Dihydrolipoyllysine-residue succinyltransferase component of 2-oxoglutarate dehydrogenase complex, mitochondrial OS=Saccharomyces cerevisiae (strain ATCC 204508 / S288c) OX=559292 GN=KGD2 PE=1 SV=2	AQEPPVASNSFTPFPR;FGFMGLFSK;NAESLSVLDIENEIVR	1	1	1	3	2	1	1	1	3	2	3.5	3.5	3.5	8.9	5.4	1	1	0	2	2		5.88834	7.25008	0	7.0447	17	50.43	0.170796	-0.100108	20.0426	19.5905	19.7854	19.4438	19.3285	15.7841	20.028	20.1366	19.5542	19.8156	19.765	19.9378
Color [DarkGray]	1	4	P21801	P21801	Succinate dehydrogenase [ubiquinone] iron-sulfur subunit, mitochondrial	SDH2	SDHB_YEAST Succinate dehydrogenase [ubiquinone] iron-sulfur subunit, mitochondrial OS=Saccharomyces cerevisiae (strain ATCC 204508 / S288c) OX=559292 GN=SDH2 PE=1 SV=1	DGTEVLQSIEDR;DLVPDLTNFYQQYK;EGICGSCAMNIGGR	2	1	1	2	2	2	1	1	2	2	9.8	5.3	5.3	9.8	10.5	2	0	1	0	2		6.48262	7.68674	0	4.5571	23	30.231	0.483808	-0.103575	20.8965	20.7288	20.7362	20.6486	20.7044	20.7151	20.7468	21.0013	20.9241	20.5415	20.6349	20.5651
Color [DarkGray]	1	4	P16140	P16140	V-type proton ATPase subunit B	VMA2	VATB_YEAST V-type proton ATPase subunit B OS=Saccharomyces cerevisiae (strain ATCC 204508 / S288c) OX=559292 GN=VMA2 PE=1 SV=2	AVEQGFNVKPR;AVVGEEALSIEDK;AVVGEEALSIEDKLSLEFLEK;DHGDVSNQLYAK;DVHDGHEENFSIVFAAMGVNLETAR;FFKQDFEENGSLER;GYPGYMYTDLSTIYER;ILDEFYDR;IPIFSASGLPHNEIAAQICR;KDHGDVSNQLYAK;LNYNTVSGVNGPLVILEK;NGSITQIPILTMPNDDITHPIPDLTGYITEGQIFVDR;QAGLVRPTK;TSLFLNLANDPTIER;TTVEFTGESLRIPVSEDMLGR;TVFESLDQAWSLLR;VFAEDYLDINGSPINPYAR;VLSDKELFAINKK;YNEIVNLTLPDGTVR	10	10	18	11	12	10	10	18	11	12	29	30.8	52.4	30.2	36.8	4	4	18	7	8		7.03627	8.73052	0	105.03	123	57.749	0.470464	-0.104204	22.0538	22.3418	22.1817	21.7345	21.8617	21.8079	22.3626	22.3231	22.2043	22.2485	22.2689	22.2249
Color [DarkGray]	1	4	P36018	P36018	GTP-binding protein YPT52	YPT52	YPT52_YEAST GTP-binding protein YPT52 OS=Saccharomyces cerevisiae (strain ATCC 204508 / S288c) OX=559292 GN=YPT52 PE=1 SV=1	AISTEEAKQYAQEQGLLFR;ESTIGAAFLSQSITIHPNDGNETK;FEIWDTAGQER;LVLLGDSSVGK;LYDLKKDEILSK;NANAALVVYDITQEDSLQK;NWVDELKNK;QIGGGNNGQVDINLQR;QYAQEQGLLFR;SLAPMYYR;TGEGVKEIFQDIGEK;VDLCQETPSTETSPDSNEGGDEEQKVR;VGDDDLVIYLLGNK;VGDDDLVIYLLGNKVDLCQETPSTETSPDSNEGGDEEQKVR	11	7	11	10	11	10	7	11	9	10	58.1	41.9	67.1	56.4	71.8	6	7	8	7	8		7.33696	8.68289	0	261.47	127	26.132	0.461814	-0.112726	22.979	22.7022	22.7081	22.275	22.3816	22.3391	22.8258	22.8946	23.007	22.7524	22.6541	22.6555
Color [DarkGray]	1	4	Q06409	Q06409	DOCK-like protein YLR422W	YLR422W	YL422_YEAST DOCK-like protein YLR422W OS=Saccharomyces cerevisiae (strain ATCC 204508 / S288c) OX=559292 GN=YLR422W PE=1 SV=1	IPNQEEFDDDRTARHIEMFEYLLEANR	1	1	0	1	1	1	1	0	1	1	1.4	1.4	0	1.4	1.4	0	0	0	0	0		5.3006	7.31345	0.0096154	1.5176	1	221.56	0.211379	-0.114052	19.7855	20.4347	20.3874	20.4456	20.6974	20.4702	20.3109	20.337	20.302	20.3467	20.1659	20.4147
Color [DarkGray]	1	4	P47912	P47912	Long-chain-fatty-acid--CoA ligase 4	FAA4	LCF4_YEAST Long-chain-fatty-acid--CoA ligase 4 OS=Saccharomyces cerevisiae (strain ATCC 204508 / S288c) OX=559292 GN=FAA4 PE=1 SV=1	DIIDIHETKK;FHIFASTSHK;FVIHNEPIDPSDKR;IYSFDEIIEIGKK;NIPCSGLLSGLIFK;TGDIAEWTPK;VKPVGIVVPNLGHLSK	1	3	3	1	5	1	3	3	1	5	2	6.3	5.3	2	9.7	2	1	3	1	1		5.44795	7.57054	0	9.2849	27	77.266	0.244304	-0.130582	19.8671	20.0573	19.9518	20.0246	21.3456	20.2394	20.0238	20.4706	19.7736	20.1583	20.4514	20.3217
Color [DarkGray]	1	4	P23641	P23641	Mitochondrial phosphate carrier protein;Mitochondrial phosphate carrier protein, N-terminally processed	MIR1	MPCP_YEAST Mitochondrial phosphate carrier protein OS=Saccharomyces cerevisiae (strain ATCC 204508 / S288c) OX=559292 GN=MIR1 PE=1 SV=1	FFIDNLGYDTASR;FGGYEVFKK;ILKEEGIGSFYSGFTPILFK;IQLEPTVYNK	1	2	3	1	3	1	2	3	1	3	4.2	7.1	13.8	4.2	13.5	1	1	2	1	0		6.401	7.6417	0	4.2522	18	32.812	0.589095	-0.131983	20.3939	20.524	20.6602	20.9797	20.9195	20.6954	20.6444	20.7752	20.5546	20.1946	20.2767	20.1929
Color [DarkGray]	1	4	P40531	P40531	Protein GVP36	GVP36	GVP36_YEAST Protein GVP36 OS=Saccharomyces cerevisiae (strain ATCC 204508 / S288c) OX=559292 GN=GVP36 PE=1 SV=1	AQAEYFETSAGLMK;EFLSNSFAEEPEAKPEVAEEEKPQTAISMNDEDDA;EYTELEDKVDTIK;IQQDTLIQTK;KLQEISTSVSEK;KLQEISTSVSEKTQELPSLAQSTQR;LGQVTDISQLPR;LIYNHFLGVTAIYENGSYDYPK;LQEISTSVSEK;LTELTHATSASEAQNILVAPGPIKEPK;MFPTEEQPLASALLQFSDVQAK;SFNAFASSLSK;TNLANNKKPEK;TQELPSLAQSTQR;VALNSSECLNK;YINESVNEFSR	12	12	12	13	12	12	12	12	13	12	54.6	50.3	58.3	58.6	57.7	11	7	18	14	17		7.60261	9.07558	0	323.31	201	36.67	1.33959	-0.139345	22.9303	23.0041	23.0759	22.3238	22.1236	22.4238	23.1126	23.1244	23.1913	23.3879	23.2686	23.3748
Color [DarkGray]	1	4	P21243	P21243	Proteasome subunit alpha type-1	SCL1	PSA1_YEAST Proteasome subunit alpha type-1 OS=Saccharomyces cerevisiae (strain ATCC 204508 / S288c) OX=559292 GN=SCL1 PE=1 SV=1	ATNQTNINSLAVR;QQEITTNLENHFKK	0	0	2	0	0	0	0	2	0	0	0	0	10.7	0	0	0	0	2	0	0		5.48244	6.7612	0	12.763	4	28.001	0.189072	-0.14034	16.2699	16.8277	17.0685	18.1379	18.7714	15.8982	16.5531	17.0651	16.9689	17.393	17.3171	19.6764
Color [DarkGray]	1	4	P07262	P07262	NADP-specific glutamate dehydrogenase 1	GDH1	DHE4_YEAST NADP-specific glutamate dehydrogenase 1 OS=Saccharomyces cerevisiae (strain ATCC 204508 / S288c) OX=559292 GN=GDH1 PE=1 SV=2	EIGYLFGAYR;FIAEGSNMGSTPEAIAVFETAR;FLGFEQIFK;HIGQDTDVPAGDIGVGGR;VDIALPCATQNEVSGEEAK;VTISGSGNVAQYAALK;VTWENDKGEQEVAQGYR	2	0	5	3	6	0	0	2	1	3	4.2	0	15.4	8.1	19.6	0	0	4	0	2		5.9578	7.64423	0	16.844	27	49.569	0.482829	-0.142485	19.7316	19.8901	19.8607	17.022	18.1986	17.1433	19.7975	19.9148	20.1975	19.786	19.6374	19.7657
Color [DarkGray]	1	4	P00890	P00890	Citrate synthase, mitochondrial	CIT1	CISY1_YEAST Citrate synthase, mitochondrial OS=Saccharomyces cerevisiae (strain ATCC 204508 / S288c) OX=559292 GN=CIT1 PE=1 SV=2	AIGVLPQLIIDR;ALSADLAAR;ANQEVLEWLFK;AYAQGVSKK;DLHPMAQFSIAVTALESESK;EYWSYTFEDSLDLLGKLPVIASK;FAEIIPAKAEEIKK;GLVWEGSVLDPEEGIR;HFPDYELFK;ITSTDPNADYGK;ITSTDPNADYGKNLAQLLGYENKDFIDLMR;LVSTIYEVAPGVLTK;NLAQLLGYENK;NLAQLLGYENKDFIDLMR;SEIPEHVIQLLDSLPK;TVIGEVLLEQAYGGMR;VVPGYGHAVLR;VVPGYGHAVLRK;YLWDTLNAGR	13	12	17	16	16	12	12	16	15	15	37.6	33	44.5	41.5	41.5	8	3	21	12	18		7.53726	9.105	0	235.83	211	53.359	1.30447	-0.143744	23.1302	22.9759	23.0887	21.7556	21.9124	21.8449	23.1622	23.231	23.2327	23.2369	23.2243	23.1831
Color [DarkGray]	1	4	Q03048	Q03048	Cofilin	COF1	COFI_YEAST Cofilin OS=Saccharomyces cerevisiae (strain ATCC 204508 / S288c) OX=559292 GN=COF1 PE=1 SV=1	ALNGVSTDVQGTDFSEVSYDSVLER;IVFFTWSPDTAPVR	1	1	1	1	1	1	1	1	1	1	9.8	9.8	9.8	9.8	9.8	0	0	0	0	0		6.5844	7.42949	0	3.0962	5	15.901	0.883076	-0.153905	20.5616	20.4935	20.6185	20.2474	19.9716	20.5724	20.6199	20.8553	20.6601	20.499	20.489	20.4348
Color [DarkGray]	1	4	P07560	P07560	Ras-related protein SEC4	SEC4	SEC4_YEAST Ras-related protein SEC4 OS=Saccharomyces cerevisiae (strain ATCC 204508 / S288c) OX=559292 GN=SEC4 PE=1 SV=1	EGNISINSGSGNSSK;ELGIPFIESSAK;ELGIPFIESSAKNDDNVNEIFFTLAK;FVEDKFNPSFITTIGIDFK;ILLIGDSGVGK;LQLWDTAGQER;NDDNVNEIFFTLAK;TVNEHANDEAQLLLVGNK	8	6	7	7	7	7	5	6	6	6	46.5	41.4	41.4	41.4	41.4	9	5	7	8	9		7.29115	8.59814	0	46.166	117	23.505	0.777299	-0.164811	22.9271	22.7253	23.0582	22.8477	22.9204	22.7415	23.0415	23.082	23.0815	22.8754	23.0548	22.8072
Color [DarkGray]	1	4	P22336	P22336	Replication factor A protein 1	RFA1	RFA1_YEAST Replication factor A protein 1 OS=Saccharomyces cerevisiae (strain ATCC 204508 / S288c) OX=559292 GN=RFA1 PE=1 SV=1	AREDTYNDQSR;ATAFNDFATK;DTVIEECFDESNVPK;FNEILQEGK;GDFHSIFTNK;GDGKLFNVNFLDTSGEIR;ITQSIQMNEYDFR;KFANENPNSQK;KNLIMISDGIYHMK;LDAIQNQEVNSNVDVLGIIQTINPHFELTSR;LFNVNFLDTSGEIR;LQPAKPQFTNLTHPYELNLDRDTVIEECFDESNVPK;NLIMISDGIYHMK;QEPGMGGQSAASLTK;QLLGVDANTLMSLKEEDPNEFTK;QRYDNPTGGVYQVYNTR;SEKGDFFSVK;SLSMGFSSTLIPNPEIPEAYALK;TRPIFAIEQLSPYQNVWTIK;VDNFAYPACSNENCNK;VDNFAYPACSNENCNKK;VIIAEPAIVR;VLEQPDGTWR;YDNPTGGVYQ…	0	24	0	0	1	0	24	0	0	1	0	50.2	0	0	2.3	0	30	0	0	0		7.04743	8.71583	0	128.76	96	70.347	0.145598	-0.168913	16.3766	16.8377	17.0228	24.1678	22.6867	24.2328	17.6473	16.7584	16.3381	14.7719	15.9584	16.7002
Color [DarkGray]	1	4	P32565	P32565	26S proteasome regulatory subunit RPN2	RPN2	RPN2_YEAST 26S proteasome regulatory subunit RPN2 OS=Saccharomyces cerevisiae (strain ATCC 204508 / S288c) OX=559292 GN=RPN2 PE=1 SV=4	GGSLYGLGLIYAGFGR;GLAVGLALINYGR;GLQSAIDVLDPLTKDPVDFVR;SLTTAAPLLALLR;VVVNLNDAGLALQLFK	2	1	3	2	4	2	1	3	2	4	3.6	1.4	5	3.6	6.7	1	1	2	2	4		5.51476	7.42423	0	13.471	30	104.23	0.941724	-0.170154	19.0799	19.1646	19.3147	18.3567	18.7935	18.5166	19.4551	19.3053	19.3093	19.8428	19.6146	19.204
Color [DarkGray]	1	4	P11075	P11075	Protein transport protein SEC7	SEC7	SEC7_YEAST Protein transport protein SEC7 OS=Saccharomyces cerevisiae (strain ATCC 204508 / S288c) OX=559292 GN=SEC7 PE=1 SV=2	ADTAYVLSYSLIMLNTDLHSSQIK;ALTAVSLEEIESSENASTPR;DFLEGLFNEIANNEIK;EIPVFLTEIYFPISELTTSTSQQK;FISSSELVVLMDNIFTK;IATNSNLAVVFFAIDSLR;LLFPIFGVLSK;MVSLNCIVSVLR;SCLQQLILQNVSK;SSELSGNAIVDFIK	2	1	6	5	6	2	1	6	5	6	1.4	0.8	4.9	4.5	5.2	0	0	5	3	3		6.30348	8.30073	0	56.069	35	226.88	0.089987	-0.173928	21.6932	23.6011	22.7695	22.1143	22.608	22.9423	23.6756	22.5447	22.3653	23.0152	23.3835	22.4904
Color [DarkGray]	1	4	P02557	P02557	Tubulin beta chain	TUB2	TBB_YEAST Tubulin beta chain OS=Saccharomyces cerevisiae (strain ATCC 204508 / S288c) OX=559292 GN=TUB2 PE=1 SV=2	EAEGCDSLQGFQITHSLGGGTGSGMGTLLISK;GHYTEGAELVDSVMDVIRR;LAVNLVPFPR;LHFFMVGYAPLTAIGSQSFR;LNQPSYGDLNNLVSSVMSGVTTSLR;MMATFSVLPSPK;NSAIGNLFRPDNYIFGQSSAGNVWAK;SINVDLEPGTIDAVR;SLTVPELTQQMFDAK;TSDTVVEPYNATLSVHQLVEHSDETFCIDNEALYDICQR;VGDQFSAMFK;YLTVAAFFR;YPGQLNSDLR;YPGQLNSDLRK	10	11	14	12	12	10	11	14	12	12	30.6	46.4	53.2	46.4	46.8	4	5	15	14	15		7.33306	8.74663	0	292.21	181	50.922	0.91089	-0.176226	22.7035	22.4845	22.721	22.3828	22.2367	22.1535	22.7369	22.7973	22.9034	22.7202	22.6969	22.6248
Color [DarkGray]	1	4	Q04636	Q04636	FACT complex subunit POB3	POB3	POB3_YEAST FACT complex subunit POB3 OS=Saccharomyces cerevisiae (strain ATCC 204508 / S288c) OX=559292 GN=POB3 PE=1 SV=1	ADIGEVAGDAIVSFQDVFFTTPR;NQGVIQLDGFSQDDYNLIK	0	0	2	1	1	0	0	2	1	1	0	0	7.6	4.2	4.2	0	0	2	1	0		5.29436	6.75676	0	9.8677	6	62.993	0.0891645	-0.182265	17.573	17.5999	16.6622	16.943	18.9573	18.458	18.3247	17.8893	16.1679	18.3678	18.3953	17.8437
Color [DarkGray]	1	4	Q01855	Q01855	40S ribosomal protein S15	RPS15	RS15_YEAST 40S ribosomal protein S15 OS=Saccharomyces cerevisiae (strain ATCC 204508 / S288c) OX=559292 GN=RPS15 PE=1 SV=1	LAAPENEKPAPVR	1	1	0	1	1	1	1	0	1	1	9.2	9.2	0	9.2	9.2	0	1	0	1	1		5.62431	7.12827	0.0035149	2.0425	12	16.002	0.0373419	-0.183623	20.3516	20.7464	16.4884	16.3727	15.0606	20.3728	17.4505	20.4652	20.2216	20.1471	20.2831	20.5003
Color [DarkGray]	1	4	P04517c	P04517c			P04517c TEV inclusion protein A	DFPPFPQK;DFPPFPQKLK;DGFIVGIHSASNFTNTNNYFTSVPK;DGQCGSPLVSTR;DGQCGSPLVSTRDGFIVGIHSASNFTNTNNYFTSVPK;DYNPISSTICHLTNESDGHTTSLYGIGFGPFIITNK;DYNPISSTICHLTNESDGHTTSLYGIGFGPFIITNKHLFR;EERICLVTTNFQTK;FREPQREER;GESLFKGPR;HWIQTKDGQCGSPLVSTR;ICLVTTNFQTK;LKFREPQR;LNADSVLWGGHK;MPKDFPPFPQK;NFMELLTNQEAQQWVSGWR;NFMELLTNQEAQQWVSGWRLNADSVLWGGHK;NTTTLQQHLIDGR;NTTTLQQHLIDGRDMIIIR;PEEPFQPVK;RNNGTLLVQSLHGVFK;SMSSMVSDTSC…	23	24	22	22	23	23	24	22	22	23	86	92.6	86	86	86	574	836	884	824	919		11.1461	12.5417	0	323.31	12723	27.527	2.261	-0.184566	35.1636	35.1187	35.0832	35.132	35.0398	35.1407	35.2694	35.2968	35.3529	34.93	34.9145	34.9517
Color [DarkGray]	1	4	Q02685	Q02685	RecQ-mediated genome instability protein 1	RMI1	RMI1_YEAST RecQ-mediated genome instability protein 1 OS=Saccharomyces cerevisiae (strain ATCC 204508 / S288c) OX=559292 GN=RMI1 PE=1 SV=1	DSQVIFLGGINR;FCDYLESK;SFSSILSQDITDDITPPAYSATLGSR	0	3	0	0	0	0	3	0	0	0	0	19.1	0	0	0	0	4	0	0	0		5.68871	6.7679	0	7.509	7	26.859	0.198155	-0.19032	16.9545	16.1698	17.2013	19.6478	19.6574	19.81	16.6424	16.9244	17.3298	15.8885	15.7987	15.7798
Color [DarkGray]	1	4	P47117	P47117	Actin-related protein 3	ARP3	ARP3_YEAST Actin-related protein 3 OS=Saccharomyces cerevisiae (strain ATCC 204508 / S288c) OX=559292 GN=ARP3 PE=1 SV=1	DITLFIQSLLR;SLTGTVIDSGDGVTHVIPVAEGYVIGSAIK;STGVDVSVISHR	0	0	1	1	2	0	0	1	1	2	0	0	2.4	2.4	9.1	0	0	1	1	2		5.1052	6.62433	0	7.372	13	49.541	0.0806356	-0.196387	16.6435	16.9122	16.6381	17.7805	15.4989	17.0553	18.5587	16.5576	15.6667	19.2328	18.886	18.5218
Color [DarkGray]	1	4	P39076	P39076	T-complex protein 1 subunit beta	CCT2	TCPB_YEAST T-complex protein 1 subunit beta OS=Saccharomyces cerevisiae (strain ATCC 204508 / S288c) OX=559292 GN=CCT2 PE=1 SV=1	GATDQTLDEAER;LGECDVIEEIMLGEQPFLK;VQDDEVGDGTTSVTVLSAELLR	0	0	2	0	0	0	0	2	0	0	0	0	7.8	0	0	0	0	2	0	0		4.47449	5.9369	0.0035026	2.0308	6	57.203	0.459183	-0.231376	16.619	16.1693	16.1612	16.4695	15.6656	15.9949	16.4571	16.3343	16.8524	16.768	15.7059	16.8456
Color [DarkGray]	1	4	P08678	P08678	Adenylate cyclase	CYR1	CYAA_YEAST Adenylate cyclase OS=Saccharomyces cerevisiae (strain ATCC 204508 / S288c) OX=559292 GN=CYR1 PE=1 SV=2	AQLSSIPGELLTK;LELNQNNLTR;LESIMSALSGGFIELDSR;SFISHDIDADLSDLTVLPQLK;TNASNLQNLFLTDNR;VANLSLSTVNPAPANR	1	1	4	3	2	1	1	4	3	2	0.6	0.6	3.3	2.4	1.7	0	1	2	1	2		5.07849	7.29607	0	22.023	26	227.83	0.453718	-0.234957	19.0786	19.0438	18.4809	19.2081	18.9383	19.1372	19.0837	19.3034	18.921	18.9969	18.8752	19.0412
Color [DarkGray]	1	4	P40469	P40469	DNA repair/transcription protein MET18/MMS19	MET18	MET18_YEAST DNA repair/transcription protein MET18/MMS19 OS=Saccharomyces cerevisiae (strain ATCC 204508 / S288c) OX=559292 GN=MET18 PE=1 SV=1	FEIMQNSEGNENTLLNPYNK;IILDFTTSR	1	1	1	1	1	1	1	1	1	1	0.9	0.9	0.9	0.9	0.9	2	2	1	1	0		6.89097	8.6544	0	4.9229	24	117.88	0.340056	-0.24138	23.5559	24.3893	24.4669	24.2072	23.5452	23.7213	24.3144	24.3962	24.4257	23.3063	23.2822	23.9591
Color [DarkGray]	1	4	P53599	P53599	MAP kinase kinase kinase SSK2	SSK2	SSK2_YEAST MAP kinase kinase kinase SSK2 OS=Saccharomyces cerevisiae (strain ATCC 204508 / S288c) OX=559292 GN=SSK2 PE=1 SV=1	DVNNDQPCEIEDEEWHSILGSEDLLSK;IANNGTRLASMNK;VYSAVDLDNGEILAVKEINIQDSKSMQK	2	2	2	2	2	2	2	2	2	2	2.5	2.5	2.5	2.5	2.5	0	0	0	2	0		6.14727	8.08679	0.0034783	1.9719	4	180.53	0.950403	-0.252223	22.1307	21.846	22.24	22.0207	22.0676	21.9476	22.2511	22.3319	22.3904	21.6261	21.8483	21.7148
Color [DarkGray]	1	4	P36017;P36019	P36017	Vacuolar protein sorting-associated protein 21	VPS21	VPS21_YEAST Vacuolar protein sorting-associated protein 21 OS=Saccharomyces cerevisiae (strain ATCC 204508 / S288c) OX=559292 GN=VPS21 PE=1 SV=1	DIIIALVGNK;DIIIALVGNKIDMLQEGGER;FASLAPMYYR;FEIWDTAGQER;FVSNDFAENKEPTIGAAFLTQR;GLLFFETSAK;LVLLGEAAVGK;MNTSVTSIK;NAQAALVVYDVTKPQSFIK;TAEEQNSASNER;TAEEQNSASNERESNNQR;VAREEGEKLAEEK;VTINEHTVK;VTINEHTVKFEIWDTAGQER	6	6	8	10	9	6	6	8	10	9	44.3	33.8	53.8	69.5	58.1	4	5	7	8	8		6.98423	8.49217	0	203.16	99	23.081	1.56456	-0.253895	22.6885	22.4534	22.5432	22.1092	22.2401	22.3263	22.8607	22.7596	22.8265	22.3648	22.2675	22.3802
Color [DarkGray]	1	4	P07244	P07244	Bifunctional purine biosynthetic protein ADE5,7;Phosphoribosylamine--glycine ligase;Phosphoribosylformylglycinamidine cyclo-ligase	ADE5,7	PUR2_YEAST Bifunctional purine biosynthetic protein ADE5,7 OS=Saccharomyces cerevisiae (strain ATCC 204508 / S288c) OX=559292 GN=ADE5,7 PE=1 SV=1	GVIIPSSIDESVQAIKDIMVTK;LLLGLAHITGGGLVENIPR;RPGADSDIGGFGGLFDLAQAGFR;SAVTVVVAAGGYPESYAK	1	0	4	1	3	1	0	4	1	3	2.9	0	10.2	2.9	8	1	0	6	1	4		4.17508	7.21458	0	7.1506	24	86.067	0.586522	-0.274162	18.6796	18.8793	19.349	17.8866	19.2084	17.0937	19.16	19.3703	19.2	19.0409	19.5159	19.3464
Color [DarkGray]	1	4	P13663	P13663	Aspartate-semialdehyde dehydrogenase	HOM2	DHAS_YEAST Aspartate-semialdehyde dehydrogenase OS=Saccharomyces cerevisiae (strain ATCC 204508 / S288c) OX=559292 GN=HOM2 PE=1 SV=1	IAGVLGATGSVGQR;ILAPLAEDKTHVK	1	1	2	2	2	1	1	2	2	2	3.6	3.6	7.4	7.4	7.4	0	1	2	1	2		5.62864	7.38025	0	8.7179	22	39.543	1.03835	-0.310383	19.8123	20.1477	19.8186	19.8326	19.8043	17.5925	20.0683	20.3537	20.2877	19.9608	19.7728	20.3746
Color [DarkGray]	1	4	P16120	P16120	Threonine synthase	THR4	THRC_YEAST Threonine synthase OS=Saccharomyces cerevisiae (strain ATCC 204508 / S288c) OX=559292 GN=THR4 PE=1 SV=1	FVVPSGNFGDILAGYFAK;LSFQDLAFAIMR	0	0	1	1	2	0	0	1	1	2	0	0	2.3	2.3	5.8	0	0	1	0	3		4.81537	6.24672	0.0037106	2.352	8	57.474	0.552101	-0.319901	16.563	16.4948	16.4923	16.5265	16.1198	16.0975	16.7207	17.3256	16.4635	17.586	17.7693	16.9337
Color [DarkGray]	1	4	P38886	P38886	26S proteasome regulatory subunit RPN10	RPN10	RPN10_YEAST 26S proteasome regulatory subunit RPN10 OS=Saccharomyces cerevisiae (strain ATCC 204508 / S288c) OX=559292 GN=RPN10 PE=1 SV=3	ILAGLHDTQIEGK;VLSTFTAEFGK	1	0	2	1	1	1	0	2	1	1	4.1	0	9	4.1	4.9	0	0	1	1	0		5.69892	6.75226	0.0034722	1.9649	5	29.747	0.147203	-0.321234	18.5868	16.881	16.8853	16.828	15.5927	16.2005	17.1741	17.2104	18.9323	18.8296	19.09	18.6102
Color [DarkGray]	1	4	Q07478	Q07478	ATP-dependent RNA helicase SUB2	SUB2	SUB2_YEAST ATP-dependent RNA helicase SUB2 OS=Saccharomyces cerevisiae (strain ATCC 204508 / S288c) OX=559292 GN=SUB2 PE=1 SV=1	GSYVGIHSTGFKDFLLKPELSR;IAEFPEEGIDPSTYLNN;INLAINYDLTNEADQYLHR;NKDTAPHIVVATPGR	2	0	2	1	3	2	0	2	1	3	7.6	0	8.3	3.4	11.4	0	0	1	1	2		4.83081	7.65219	0	6.7111	10	50.308	0.752928	-0.328824	20.5061	20.9131	20.6171	16.6499	19.6579	20.2501	21.1695	20.6882	21.1652	21.4744	21.0155	20.7763
Color [DarkGray]	1	4	P40364	P40364	Mitochondrial peculiar membrane protein 1	MPM1	MPM1_YEAST Mitochondrial peculiar membrane protein 1 OS=Saccharomyces cerevisiae (strain ATCC 204508 / S288c) OX=559292 GN=MPM1 PE=1 SV=1	AIPPLPQLDFLLPLEEIK;DLGDSALAMASGIPTVK;DSNDAKPSTVK;DSNDAKPSTVKTEK;FATAPFWNLFPK;IYFDDGTVDITTTTTSK;LRDIDEYDNPLLPLPFNFNFR;SHSHGLFFNDFNLFLK;TPEDLMLNWDDLHLGNDAEYASADGSK	4	4	7	5	6	4	4	7	5	6	17.1	24.2	37.3	24.2	30.6	1	3	7	4	5		6.59596	8.00706	0	199	55	28.47	0.967049	-0.334994	20.0962	20.5987	20.401	20.9272	20.4895	20.4445	20.8367	20.663	20.6012	20.4702	20.3282	20.5557
Color [DarkGray]	1	4	P08566	P08566	Pentafunctional AROM polypeptide;3-dehydroquinate synthase;3-phosphoshikimate 1-carboxyvinyltransferase;Shikimate kinase;3-dehydroquinate dehydratase;Shikimate dehydrogenase	ARO1	ARO1_YEAST Pentafunctional AROM polypeptide OS=Saccharomyces cerevisiae (strain ATCC 204508 / S288c) OX=559292 GN=ARO1 PE=1 SV=1	LKPLIESLPSEFNIIGIESTK;LVDLDELFEQQHNNQSVK	0	0	1	1	2	0	0	1	1	2	0	0	1.3	1.3	2.5	0	0	0	0	2		4.69567	6.60949	0.0034965	1.986	4	174.75	0.122576	-0.336614	18.4059	16.3701	18.0995	17.7367	18.0773	15.8614	18.5619	16.4189	18.9045	18.7658	18.6545	18.8548
Color [DarkGray]	1	4	P27692	P27692	Transcription elongation factor SPT5	SPT5	SPT5_YEAST Transcription elongation factor SPT5 OS=Saccharomyces cerevisiae (strain ATCC 204508 / S288c) OX=559292 GN=SPT5 PE=1 SV=1	DGGASAWGNQDDGNR;EGFITHGDDEDDEASAPGAR;EGGEGITYDELVNRR;LLIPVQELPLLLKPNK;LNGFTTPLEFPISTLR;SAWNNQGNK;SAYGGASTWGGNNNNK;SDDVALEEGSYVR;SIDTTATSSEYALHDIVELSAK;SNYGGNSTWGGH;SSWGGASTWASGGESNGAMSTWGGTGDR;TFQQPIQSR	7	6	9	8	7	7	6	9	8	7	9	7.6	13.8	11.7	10.3	2	5	6	7	5		7.26319	8.96936	0	63.908	82	115.65	1.44739	-0.339282	24.0935	24.2043	24.245	24.3921	24.1274	24.4048	24.4275	24.4149	24.7182	24.0456	24.0192	24.2339
Color [DarkGray]	1	4	P38840	P38840	Aromatic amino acid aminotransferase 2	ARO9	ARO9_YEAST Aromatic amino acid aminotransferase 2 OS=Saccharomyces cerevisiae (strain ATCC 204508 / S288c) OX=559292 GN=ARO9 PE=1 SV=3	HDFLIVEDDPYGYLYFPSYNPQEPLENPYHSSDLTTER;SFLTLDTDAR;SFWDASDISDDVIELAGGMPNER	1	1	3	1	2	1	1	3	1	2	1.9	1.9	13.8	1.9	9.4	0	0	4	0	1		5.60126	7.20036	0	24.2	13	58.527	1.9503	-0.344418	18.9939	18.8139	19.0382	18.5384	18.4335	15.5668	19.2237	19.3127	19.3428	19.1975	19.2567	19.4807
Color [DarkGray]	1	4	P23639	P23639	Proteasome subunit alpha type-2	PRE8	PSA2_YEAST Proteasome subunit alpha type-2 OS=Saccharomyces cerevisiae (strain ATCC 204508 / S288c) OX=559292 GN=PRE8 PE=1 SV=1	LGQIDYALTAVK;VSLLTPDIGAVYSGMGPDYR	0	0	2	0	0	0	0	2	0	0	0	0	12.8	0	0	0	0	2	0	0		5.60671	6.68589	0.0066225	1.7059	5	27.162	0.19801	-0.345949	16.8174	18.1933	16.2942	15.145	15.6601	17.8802	16.7584	17.9832	17.6012	16.0468	18.3391	15.7847
Color [DarkGray]	1	4	P19146	P19146	ADP-ribosylation factor 2	ARF2	ARF2_YEAST ADP-ribosylation factor 2 OS=Saccharomyces cerevisiae (strain ATCC 204508 / S288c) OX=559292 GN=ARF2 PE=1 SV=3	LFSNLFGNK;LGEVITTIPTIGFNVETVQYK;NAVWLVFANK;NAVWLVFANKQDLPEAMSAAEITEK;NISFTVWDVGGQDR;NRPWFIQSTCATSGEGLYEGLEWLSNNLK;NTEGVIFVIDSNDR;QDLPEAMSAAEITEK	5	5	7	6	6	2	1	3	2	2	38.1	38.1	61.9	45.9	45.9	2	4	7	5	5		7.46001	8.5058	0	62.069	75	20.657	1.98519	-0.349974	22.1505	21.9987	21.9463	21.4367	21.3418	21.5031	22.3647	22.3115	22.4692	22.4447	22.4352	22.4301
Color [DarkGray]	1	4	P32337	P32337	Importin subunit beta-3	PSE1	IMB3_YEAST Importin subunit beta-3 OS=Saccharomyces cerevisiae (strain ATCC 204508 / S288c) OX=559292 GN=PSE1 PE=1 SV=2	DMFDQIIQFTDMVIK	0	0	1	0	0	0	0	1	0	0	0	0	1.4	0	0	0	0	1	0	0		4.18213	5.81559	0.0096618	1.5353	2	121.03	0.174642	-0.35977	17.7067	16.5393	15.5427	16.9929	16.8527	16.5853	16.021	17.4197	17.4274	16.633	17.4993	16.7182
Color [DarkGray]	1	4	P31539	P31539	Heat shock protein 104	HSP104	HS104_YEAST Heat shock protein 104 OS=Saccharomyces cerevisiae (strain ATCC 204508 / S288c) OX=559292 GN=HSP104 PE=1 SV=2	AHPDVLTVMLQMLDDGR;GADTNTPLEYLSK;IIDDDVPTILQGAK;LFSLDLAALTAGAK;LIQNEILNK;VIGATTNNEYR	4	2	2	5	5	4	2	2	5	5	5.2	3	3	6.7	7	0	2	1	4	4		5.93576	7.65176	0	13.115	29	102.03	4.92255	-0.384788	20.0975	20.1406	20.1173	19.2388	19.8966	20.0062	20.4994	20.5176	20.4928	20.6054	20.6602	20.5303
Color [DarkGray]	1	4	P32563	P32563	V-type proton ATPase subunit a, vacuolar isoform	VPH1	VPH1_YEAST V-type proton ATPase subunit a, vacuolar isoform OS=Saccharomyces cerevisiae (strain ATCC 204508 / S288c) OX=559292 GN=VPH1 PE=1 SV=3	DSAYTLGQLGLVQFR	0	1	1	1	1	0	1	1	1	1	0	1.8	1.8	1.8	1.8	0	0	0	1	1		6.11224	7.63075	0	4.6583	10	95.528	0.104767	-0.396907	16.4348	19.8139	16.9304	22.9276	18.6237	16.8394	19.2053	18.7573	16.4073	18.78	18.6956	18.8436
Color [DarkGray]	1	4	P43635	P43635	Citrate synthase 3	CIT3	CISY3_YEAST Citrate synthase 3, mitochondrial OS=Saccharomyces cerevisiae (strain ATCC 204508 / S288c) OX=559292 GN=CIT3 PE=1 SV=1	FQGLTIEECQNR;ILGLPIERPK;SLNLEGLEALTK;VIPGYGHAVLR	1	2	1	3	2	1	2	1	3	2	2.5	4.9	2.5	9.3	6.8	1	1	0	3	2		5.93611	7.43631	0	7.0741	22	53.811	0.372107	-0.402149	19.872	19.1929	20.7505	19.236	16.0882	16.3224	20.2749	20.4139	20.3331	19.9781	20.372	20.3945
Color [DarkGray]	1	4	P32898	P32898	Mitochondrial presequence protease	CYM1	CYM1_YEAST Mitochondrial presequence protease OS=Saccharomyces cerevisiae (strain ATCC 204508 / S288c) OX=559292 GN=CYM1 PE=1 SV=2	DGSALQVMSNMLTFK;DTVNNIFQNLLETEHPFDR;FQQSIYPSLNNSGGDPMK;KYPVGGIFHGYEVR;LHSLLDNEETFQR;LHTGGISTHVEVTSDPNTTEPR;NITDPESNIVFK;SSGAINETLNGIEQLQFINR	0	1	6	0	0	0	1	6	0	0	0	1.5	10	0	0	0	0	5	0	0		5.13178	7.21566	0	24.3	20	112.18	0.334152	-0.40831	17.7479	16.867	16.1043	18.0743	18.1146	18.1497	16.9772	17.4794	17.4876	16.5076	16.2685	17.3314
Color [DarkGray]	1	4	P13393	P13393	TATA-box-binding protein	SPT15	TBP_YEAST TATA-box-binding protein OS=Saccharomyces cerevisiae (strain ATCC 204508 / S288c) OX=559292 GN=SPT15 PE=1 SV=3	DGTKPATTFQSEEDIKR	0	1	0	0	0	0	1	0	0	0	0	7.1	0	0	0	0	1	0	0	0		5.6654	6.8415	0	3.4666	3	27.003	0.185444	-0.408367	17.6978	16.0668	16.9128	20.8294	20.7755	21.3288	15.9086	17.9905	18.0034	16.1595	16.081	16.0138
Color [DarkGray]	1	4	P36114	P36114	Mitochondrial outer membrane protein YKR018C	YKR018C	YKR18_YEAST IML2-like protein YKR018C OS=Saccharomyces cerevisiae (strain ATCC 204508 / S288c) OX=559292 GN=YKR018C PE=1 SV=1	AQGYADDYELSTR	0	0	1	0	0	0	0	1	0	0	0	0	1.8	0	0	0	0	1	0	0		5.17394	6.6653	0.0018975	2.546	4	81.753	0.128479	-0.422403	17.1014	15.5777	18.9616	16.8905	17.2947	17.2807	16.7795	19.036	17.0924	17.8553	16.569	18.8717
Color [DarkGray]	1	4	P40344	P40344	Autophagy-related protein 3	ATG3	ATG3_YEAST Autophagy-related protein 3 OS=Saccharomyces cerevisiae (strain ATCC 204508 / S288c) OX=559292 GN=ATG3 PE=1 SV=1	DMAQERYYDLYIAYSTSYRVPK;GFAEDGDEDDVLEYIGSETEHVQSTPAGGTK	1	1	1	2	0	1	1	1	2	0	7.1	7.1	7.1	17.1	0	0	1	0	2	0		8.37537	9.48933	0.0036765	2.3002	5	35.887	0.0346772	-0.422492	29.3013	16.948	29.2928	25.1978	30.3388	25.5181	25.4188	25.9479	25.4428	16.3864	17.6785	15.3341
Color [DarkGray]	1	4	Q00711;P47052	Q00711	Succinate dehydrogenase [ubiquinone] flavoprotein subunit, mitochondrial	SDH1	SDHA_YEAST Succinate dehydrogenase [ubiquinone] flavoprotein subunit, mitochondrial OS=Saccharomyces cerevisiae (strain ATCC 204508 / S288c) OX=559292 GN=SDH1 PE=1 SV=1	AAFGLAEAGYK;AYFSCTSAHTCTGDGNAMVSR;GEGGFLVNSEGER;GSDWLGDQDSIHYMTR;LGANSLLDLVVFGR;NITAVEK;SIIELEHYGVPFSR;TIIATGGYGR;WHMYDTVK	4	3	6	4	5	4	3	6	4	5	8.9	6.4	13	10	11.2	2	2	7	6	4		6.27515	7.99542	0	32.577	53	70.229	1.04884	-0.422784	20.5744	20.5489	20.0399	20.157	20.7977	20.7022	20.8481	20.9168	20.6667	20.6743	20.7975	20.781
Color [DarkGray]	1	4	P26754	P26754	Replication factor A protein 2	RFA2	RFA2_YEAST Replication factor A protein 2 OS=Saccharomyces cerevisiae (strain ATCC 204508 / S288c) OX=559292 GN=RFA2 PE=1 SV=1	ATYQPYNEYSSVTGGGFENSESRPGSGESETNTR;CHSIASGMMK;DANSFAVPIPLISQSLNLDETTVR;GYGSQVAQQFEIGGYVK;KWSEDANDLAAGNDDSSGK;KWSEDANDLAAGNDDSSGKGYGSQVAQQFEIGGYVK;NCCTTLTDQGFIYPTFDDNNFFAL;NIQYAVIKPIDSFNEVLTHHLEVIK;NITDHTANIFLTIEDGTGQIEVR;QCEGKDANSFAVPIPLISQSLNLDETTVR;QDIQDGPFVSHNQELHHVCFVGVVR;QPLESASNNNGQSLFVK;VNTLTPVTIK;WSEDANDLAAGNDDSSGK;WSEDANDLAAGNDDSSGKGYGSQVAQQFEIGGYVK	0	12	1	0	0	0	12	1	0	0	0	70	8.8	0	0	0	13	0	0	0		6.71026	8.16152	0	85.118	48	29.936	0.303894	-0.424582	17.8178	16.83	16.1566	23.0365	23.4579	23.1998	17.9388	17.2106	16.9288	17.7392	15.5742	16.8148
Color [DarkGray]	1	4	P07264	P07264	3-isopropylmalate dehydratase	LEU1	LEUC_YEAST 3-isopropylmalate dehydratase OS=Saccharomyces cerevisiae (strain ATCC 204508 / S288c) OX=559292 GN=LEU1 PE=1 SV=3	AGMIKPDETTFQYTK;EAEILVVTGDNFGCGSSR;ILDSDGNVLVDHFEIEPFRK	0	0	2	0	2	0	0	2	0	2	0	0	4.5	0	4.5	0	0	2	0	1		4.94065	6.93825	0	9.4911	10	85.793	0.178725	-0.454821	16.5051	16.5277	17.8939	16.0272	17.2251	17.2107	16.2609	19.0863	16.944	18.8439	19.003	19.2928
Color [DarkGray]	1	4	Q08977	Q08977	UPF0662 protein YPL260W	YPL260W	YP260_YEAST UPF0662 protein YPL260W OS=Saccharomyces cerevisiae (strain ATCC 204508 / S288c) OX=559292 GN=YPL260W PE=1 SV=1	DVQTTYQHVLTK;EEESILNYLLEVR;GLLSLVASAK;NSSPAYDEDGNDDRLR;SAATLIHSTELHNR;SDINTNSLLQEQNDLQTNNESLTDDKHLVSQEYVHEK;TTLENLMITR	0	0	5	3	6	0	0	5	3	6	0	0	16.3	10.7	18.5	0	0	6	3	9		5.90859	7.71113	0	22.072	44	62.779	0.214231	-0.45847	18.0382	20.3959	19.9668	15.2279	20.141	15.7876	19.138	20.4945	20.1437	20.7384	20.6012	20.5761
Color [DarkGray]	1	4	P22137	P22137	Clathrin heavy chain	CHC1	CLH_YEAST Clathrin heavy chain OS=Saccharomyces cerevisiae (strain ATCC 204508 / S288c) OX=559292 GN=CHC1 PE=1 SV=1	IYIDSNNSPEK;SDNLPLIKPFLINVLPK;SFTLDEPVIFWR	0	0	1	1	2	0	0	1	1	2	0	0	0.7	0.7	1.8	0	0	1	1	1		4.48744	6.62413	0.0019268	2.6625	7	187.23	0.400329	-0.46023	16.7162	17.8818	18.3386	16.233	16.2825	17.3426	18.033	18.0617	18.2226	18.162	18.6813	18.1799
Color [DarkGray]	1	4	P60010	P60010	Actin	ACT1	ACT_YEAST Actin OS=Saccharomyces cerevisiae (strain ATCC 204508 / S288c) OX=559292 GN=ACT1 PE=1 SV=1	AGFAGDDAPR;APEALFHPSVLGLESAGIDQTTYNSIMK;AVFPSIVGRPR;DSYVGDEAQSK;DSYVGDEAQSKR;EITALAPSSMK;ELYGNIVMSGGTTMFPGIAER;FRAPEALFHPSVLGLESAGIDQTTYNSIMK;GYSFSTTAER;HQGIMVGMGQK;IDLAGRDLTDYLMK;IWHHTFYNELR;LCYVALDFEQEMQTAAQSSSIEK;MDSEVAALVIDNGSGMCK;QEYDESGPSIVHHK;SYELPDGQVITIGNER;TTGIVLDSGDGVTHVVPIYAGFSLPHAILR;VAPEEHPVLLTEAPMNPK;YPIEHGIVTNWDDMEK	14	14	17	16	18	14	14	17	16	18	52.3	61.1	69.9	67.2	73.6	12	41	19	25	19		7.63461	9.14594	0	123.17	343	41.689	2.27561	-0.478186	23.748	23.4499	23.6253	23.7602	23.4447	23.6021	24.0737	24.0847	24.0993	23.9378	23.9639	23.8476
Color [DarkGray]	1	4	Q00055	Q00055	Glycerol-3-phosphate dehydrogenase [NAD(+)] 1	GPD1	GPD1_YEAST Glycerol-3-phosphate dehydrogenase [NAD(+)] 1 OS=Saccharomyces cerevisiae (strain ATCC 204508 / S288c) OX=559292 GN=GPD1 PE=1 SV=4	DFRGEGKDVDHK;DVDIIVFNIPHQFLPR;EETYYQESAGVADLITTCAGGR;FGQMFFPESR;GHVDSHVR;LTEIINTR;NLPDMIEELDLHED;NVVALGCGFVEGLGWGNNASAAIQR;SAAADRLNLTSGHLNAGR;VTVIGSGNWGTTIAK;YLPGITLPDNLVANPDLIDSVKDVDIIVFNIPHQFLPR	3	6	7	6	7	3	5	6	5	6	12.3	24.8	26.9	25.6	30.2	3	4	8	11	10		7.04368	8.56909	0	26.072	99	42.868	1.98479	-0.482824	22.1883	22.205	22.2277	22.2331	22.0594	22.4635	22.8132	22.776	22.4803	22.7845	22.7806	22.396
Color [DarkGray]	1	4	P38688	P38688	Signal recognition particle subunit SRP72	SRP72	SRP72_YEAST Signal recognition particle subunit SRP72 OS=Saccharomyces cerevisiae (strain ATCC 204508 / S288c) OX=559292 GN=SRP72 PE=1 SV=2	DIDIDKLIQLGVKPLESSAK;IGELFLNESWK;IYQHLASHNEKDQDSQIELSCNER;LNTFNLQTFTHEQWSNIQR;LVDNVTLESYK;VVSSDSLDIAQGIDLVR;YNTNFNLLLR	0	6	0	0	0	0	6	0	0	0	0	15.9	0	0	0	0	8	0	0	0		5.39658	7.37731	0	15.847	20	73.54	1.91067	-0.488448	17.0281	16.7286	16.7303	20.9001	20.975	20.973	17.3433	17.3929	17.2161	16.8559	16.775	16.5891
Color [DarkGray]	1	4	P53959	P53959	Conserved oligomeric Golgi complex subunit 6	COG6	COG6_YEAST Conserved oligomeric Golgi complex subunit 6 OS=Saccharomyces cerevisiae (strain ATCC 204508 / S288c) OX=559292 GN=COG6 PE=1 SV=1	LTSPMIADEICDECFKKLSLFYNIFR;THAAEDEESEDNKLLSSK;YIGDVLASVHSIIANEADFVK	1	1	2	1	1	1	1	2	1	1	3.1	3.1	5.6	3.1	3.1	0	0	1	1	0		6.56136	8.23345	0.0035273	2.0455	4	96.975	1.5743	-0.49811	22.5193	22.724	22.7455	23.3402	23.3742	23.304	23.3877	23.1442	22.9512	22.9669	23.0878	23.0419
Color [DarkGray]	1	4	P29295	P29295	Casein kinase I homolog HRR25	HRR25	HRR25_YEAST Casein kinase I homolog HRR25 OS=Saccharomyces cerevisiae (strain ATCC 204508 / S288c) OX=559292 GN=HRR25 PE=1 SV=1	FDEKPDYLFLAR;GSLPWQGLKATTK;YASVNTHLGIEQSR;YLSGGVGIPFIR	1	4	1	1	1	1	4	1	1	1	2.8	10.3	2.6	2.6	2.6	0	3	0	0	0		6.71334	8.1113	0	4.094	9	57.339	1.05985	-0.499104	22.1482	22.0617	22.7482	22.9835	23.4509	23.0093	22.8589	22.7216	22.8749	22.5165	22.5066	22.5775
Color [DarkGray]	1	4	P07267	P07267	Saccharopepsin	PEP4	CARP_YEAST Saccharopepsin OS=Saccharomyces cerevisiae (strain ATCC 204508 / S288c) OX=559292 GN=PEP4 PE=1 SV=1	FAFYLGDTSKDTENGGEATFGGIDESK;FDGILGLGYDTISVDK;KYYSIYDLGNNAVGLAK;QDFAEATSEPGLTFAFGK;VILDTGSSNLWVPSNECGSLACFLHSK	3	3	3	4	4	3	3	3	4	4	12.6	12.6	12.6	19.3	19.3	1	2	2	4	4		6.64242	7.94436	0	28.465	43	44.498	1.4303	-0.502054	21.2471	21.0763	20.7212	20.8351	20.5007	19.8983	21.5544	21.5815	21.4148	21.3068	21.2665	21.532
Color [DarkGray]	1	4	P07281;P07280	P07281;P07280	40S ribosomal protein S19-B;40S ribosomal protein S19-A	RPS19B;RPS19A	RS19B_YEAST 40S ribosomal protein S19-B OS=Saccharomyces cerevisiae (strain ATCC 204508 / S288c) OX=559292 GN=RPS19B PE=1 SV=2;RS19A_YEAST 40S ribosomal protein S19-A OS=Saccharomyces cerevisiae (strain ATCC 204508 / S288c) OX=559292 GN=RPS19A PE=1 SV=2	DVAAQDFINAYASFLQR;VLQALEK	1	2	1	1	1	1	2	1	1	1	11.8	16.7	11.8	11.8	4.9	0	1	2	1	0		6.12294	7.07719	0	4.1261	13	15.891	1.62563	-0.50386	18.4496	18.4253	18.072	18.664	19.0726	18.6607	18.961	18.7723	18.7252	17.9675	19.9452	19.6915
Color [DarkGray]	1	4	P19882	P19882	Heat shock protein 60, mitochondrial	HSP60	HSP60_YEAST Heat shock protein 60, mitochondrial OS=Saccharomyces cerevisiae (strain ATCC 204508 / S288c) OX=559292 GN=HSP60 PE=1 SV=1	AAVEEGILPGGGTALVK;EITTSEEIAQVATISANGDSHVGK;GSIDITTTNSYEKEK;GVETLAEAVAATLGPK;KISSIQDILPALEISNQSR;NVAAGCNPMDLR;NVLIEQPFGPPK;QIIENAGEEGSVIIGK;SEYTDMLATGIIDPFK;VEFEKPLLLLSEK;VLDEVVVDNFDQK	2	4	9	5	8	2	4	9	5	8	5.1	10	24.7	14.2	23.1	1	1	8	4	9		7.38561	8.89888	0	44.84	62	60.751	2.89596	-0.508347	24.2919	24.4644	24.4753	23.7025	23.8558	23.9624	24.9446	24.8784	24.9337	25.2689	25.253	25.3329
Color [DarkGray]	1	4	P11076	P11076	ADP-ribosylation factor 1	ARF1	ARF1_YEAST ADP-ribosylation factor 1 OS=Saccharomyces cerevisiae (strain ATCC 204508 / S288c) OX=559292 GN=ARF1 PE=1 SV=3	LFSNLFGNK;LGEVITTIPTIGFNVETVQYK;NAAWLVFANK;NAAWLVFANKQDLPEAMSAAEITEK;NISFTVWDVGGQDR;NTEGVIFVVDSNDR;QDLPEAMSAAEITEK	1	1	2	2	1	1	1	2	2	1	32.6	40.3	45.9	45.9	40.3	1	1	2	1	2		6.77468	7.86609	0	11.9	21	20.529	1.29993	-0.520815	21.8201	21.2017	21.3674	21.1591	20.7431	20.8397	22.0239	21.918	22.0097	21.8072	21.9504	22.0799
Color [DarkGray]	1	4	P32263	P32263	Pyrroline-5-carboxylate reductase	PRO3	P5CR_YEAST Pyrroline-5-carboxylate reductase OS=Saccharomyces cerevisiae (strain ATCC 204508 / S288c) OX=559292 GN=PRO3 PE=1 SV=1	AADETAAAFYPSK;IITCNHDEPSAQQVTDLVETFDESPNGIK;LGIPLQESK	1	1	2	2	2	1	1	2	2	2	4.5	4.5	7.7	7.7	7.7	0	0	3	1	2		6.31662	7.56182	0	7.6958	18	30.131	0.945353	-0.548318	20.4548	20.6941	20.2125	19.4132	20.0382	19.6911	20.7217	20.82	21.4647	20.8769	20.2275	20.342
Color [DarkGray]	1	4	P00358	P00358	Glyceraldehyde-3-phosphate dehydrogenase 2	TDH2	G3P2_YEAST Glyceraldehyde-3-phosphate dehydrogenase 2 OS=Saccharomyces cerevisiae (strain ATCC 204508 / S288c) OX=559292 GN=TDH2 PE=1 SV=3	ELDTAQKHIDAGAK;ETTYDEIKK;HIDAGAKK;IVSNASCTTNCLAPLAK;KNVEVVALNDPFISNDYSAYMFK;KVVITAPSSTAPMFVMGVNEEK;KVVITAPSSTAPMFVMGVNEEKYTSDLK;LNKETTYDEIK;LNKETTYDEIKK;LTGMAFRVPTVDVSVVDLTVK;LVSWYDNEYGYSTR;NVEVVALNDPFISNDYSAYMFK;TASGNIIPSSTGAAK;TVDGPSHKDWR;VAINGFGR;VINDAFGIEEGLMTTVHSMTATQK;VLPELQGK;VPTVDVSVVDLTVK;VPTVDVSVVDLTVKLNK;VVDLVEHVAK;VVDLVEHVAKA;VVITAPSSTAPMFVMGVNEEK;VVITAPSSTAPMFVMGVNEEKYTSDLK;YAGEVSHDD…	4	4	4	4	4	3	3	3	3	3	65.1	63	67.5	65.4	67.5	6	8	10	10	9		7.0389	9.30358	0	147.4	142	35.846	2.09181	-0.577176	24.7209	24.8569	25.1212	24.0341	24.3634	24.1883	25.4785	25.494	25.458	25.5144	25.4184	25.4278
Color [DarkGray]	1	4	P46784;Q08745	P46784;Q08745	40S ribosomal protein S10-B;40S ribosomal protein S10-A	RPS10B;RPS10A	RS10B_YEAST 40S ribosomal protein S10-B OS=Saccharomyces cerevisiae (strain ATCC 204508 / S288c) OX=559292 GN=RPS10B PE=1 SV=1;RS10A_YEAST 40S ribosomal protein S10-A OS=Saccharomyces cerevisiae (strain ATCC 204508 / S288c) OX=559292 GN=RPS10A PE=1 SV=1	EYLNLPEHIVPGTYIQER;IHQYLFQEGVVVAK;LMPKQER	2	2	1	1	2	2	2	1	1	2	30.5	30.5	17.1	17.1	30.5	1	1	0	0	0		5.28128	7.81213	0	7.5393	17	12.738	0.98802	-0.584355	21.6328	21.4376	21.2858	21.4708	21.0337	20.9879	22.5514	21.7397	21.8182	21.4007	21.4296	21.8448
Color [DarkGray]	1	4	P07342	P07342	Acetolactate synthase catalytic subunit, mitochondrial	ILV2	ILVB_YEAST Acetolactate synthase catalytic subunit, mitochondrial OS=Saccharomyces cerevisiae (strain ATCC 204508 / S288c) OX=559292 GN=ILV2 PE=1 SV=1	HEQGAGHMAEGYAR;RPEPAPSFNVDPLEQPAEPSK;YSHTHQLNPDFIK	0	0	2	1	0	0	0	2	1	0	0	0	3.9	1.9	0	0	0	2	0	0		5.83772	7.35624	0	6.2249	11	74.936	0.313493	-0.610152	17.5407	19.7308	20.0401	16.6141	19.1649	19.4718	19.9445	19.5522	19.6454	16.0508	19.6162	19.6921
Color [DarkGray]	1	4	P32523	P32523	Pre-mRNA-processing factor 19	PRP19	PRP19_YEAST Pre-mRNA-processing factor 19 OS=Saccharomyces cerevisiae (strain ATCC 204508 / S288c) OX=559292 GN=PRP19 PE=1 SV=2	DEESALCLQSDTADFTDMDVVCGDGGIAAILK	1	1	1	1	1	1	1	1	1	1	6.4	6.4	6.4	6.4	6.4	0	0	1	0	0		6.51077	7.87251	0.0093313	1.3793	1	56.569	2.51094	-0.619724	20.9125	20.9635	20.8847	21.3656	21.66	21.2574	21.6735	21.5883	21.358	21.8594	21.8685	21.6578
Color [DarkGray]	1	4	P0CD98	P0CD98	Putative uncharacterized protein YLL053C		YLL53_YEAST Putative uncharacterized protein YLL053C OS=Saccharomyces cerevisiae (strain ATCC 204508 / S288c) OX=559292 GN=YLL053C PE=5 SV=1	MWFPQIIAGMAAGGAASAMTPGK	1	1	1	1	1	1	1	1	1	1	15.1	15.1	15.1	15.1	15.1	5	23	24	17	11		8.87988	9.48194	0.0019157	2.6212	185	16.456	0.793153	-0.644307	24.6338	25.8751	24.9272	27.8592	28.3496	25.6005	25.7891	25.8253	25.7547	25.852	25.9968	25.7478
Color [DarkGray]	1	4	P00359	P00359	Glyceraldehyde-3-phosphate dehydrogenase 3	TDH3	G3P3_YEAST Glyceraldehyde-3-phosphate dehydrogenase 3 OS=Saccharomyces cerevisiae (strain ATCC 204508 / S288c) OX=559292 GN=TDH3 PE=1 SV=3	DPANLPWGSSNVDIAIDSTGVFKELDTAQK;ELDTAQKHIDAGAK;ETTYDEIKK;HIDAGAKK;IALSRPNVEVVALNDPFITNDYAAYMFK;IATYQER;IATYQERDPANLPWGSSNVDIAIDSTGVFK;IATYQERDPANLPWGSSNVDIAIDSTGVFKELDTAQK;IVSNASCTTNCLAPLAK;KIATYQERDPANLPWGSSNVDIAIDSTGVFK;KVVITAPSSTAPMFVMGVNEEK;KVVITAPSSTAPMFVMGVNEEKYTSDLK;LNKETTYDEIK;LNKETTYDEIKK;LTGMAFRVPTVDVSVVDLTVK;LVSWYDNEYGYSTR;TASGNIIPSSTGAAK;TVDGPSHKDWR;VAINGFGR;VINDAFGIEEGLMTTVHSLTATQK;VL…	26	23	26	27	28	7	6	7	7	8	75.6	75.6	78	78	78	51	40	62	62	74		8.5959	10.2041	0	323.31	858	35.746	4.51766	-0.649995	26.0942	26.1696	26.1443	25.2913	25.265	25.2347	26.7497	26.7839	26.8244	26.7915	26.7579	26.7854
Color [DarkGray]	1	4	P09232	P09232	Cerevisin	PRB1	PRTB_YEAST Cerevisin OS=Saccharomyces cerevisiae (strain ATCC 204508 / S288c) OX=559292 GN=PRB1 PE=1 SV=1	AITVGASTLSDDR;AITVGASTLSDDRAYFSNWGK;GSTANMSLGGGK;YLYDDDAGR	1	0	3	4	2	1	0	3	4	2	1.4	0	5.4	6.6	3.5	0	0	1	2	2		6.3176	7.72084	0	3.4716	12	69.621	1.17593	-0.671178	20.0906	20.3956	19.8678	16.1633	15.5526	16.4557	21.2282	20.6056	20.5337	20.9078	21.2739	21.1062
Color [DarkGray]	1	4	P32324	P32324	Elongation factor 2	EFT1	EF2_YEAST Elongation factor 2 OS=Saccharomyces cerevisiae (strain ATCC 204508 / S288c) OX=559292 GN=EFT1 PE=1 SV=1	ADLMLYVSK;AEQLYEGPADDANCIAIK;AFNMFILDPIFR;ALLELQVSKEDLYQTFAR;ATYAGFLLADPK;AYLPVNESFGFTGELR;DTDAEGKPLER;ETVESESSQTALSK;FLPAADALLEMIVLHLPSPVTAQAYR;FVEPIDDCPAGNIIGLVGIDQFLLK;GQVVSEEQRPGTPLFTVK;GTVAFGSGLHGWAFTIR;HGMKEEVPGWQEYYDKL;IKPVVVINKVDR;IMADDYGWDVTDAR;IQEPVFLVEIQCPEQAVGGIYSVLNK;IQGPNYVPGKKDDLFIK;IWCFGPDGNGPNLVIDQTK;KIWCFGPDGNGPNLVIDQTK;LEIVLKGDEKDLEGK;LWGDSFFNPK;NMSVIAHVDHGK;QATGGQAFPQMVFDHWSTL…	12	14	25	22	27	12	14	25	22	27	19.7	25.4	50.6	44.3	52.4	4	12	28	21	33		7.01595	8.97141	0	129.79	309	93.288	4.48453	-0.677909	22.8166	22.7209	22.7709	22.3077	22.3017	22.2652	23.433	23.4262	23.4828	23.6327	23.5653	23.561
Color [DarkGray]	1	4	P18239;P18238;P04710	P18239	ADP,ATP carrier protein 2	PET9	ADT2_YEAST ADP,ATP carrier protein 2 OS=Saccharomyces cerevisiae (strain ATCC 204508 / S288c) OX=559292 GN=PET9 PE=1 SV=2	GFLPSVVGIVVYR;IVAAEGVGSLFK;KESNFLIDFLMGGVSAAVAK;LLIQNQDEMLK;YFPTQALNFAFK	2	4	4	5	4	2	4	4	5	4	10.1	17.3	17.6	21.4	17.6	2	3	4	5	4		6.52259	7.98028	0	11.344	53	34.426	1.40535	-0.706288	20.7207	20.7336	20.338	20.8083	21.3821	21.0377	21.4969	21.5004	20.9138	21.258	21.1602	20.8034
Color [DarkGray]	1	4	P00330	P00330	Alcohol dehydrogenase 1	ADH1	ADH1_YEAST Alcohol dehydrogenase 1 OS=Saccharomyces cerevisiae (strain ATCC 204508 / S288c) OX=559292 GN=ADH1 PE=1 SV=5	ANELLINVK;ANGTTVLVGMPAGAK;ATDGGAHGVINVSVSEAAIEASTR;CCSDVFNQVVK;EALDFFAR;GVIFYESHGK;GVIFYESHGKLEYK;IGDYAGIK;LEYKDIPVPKPK;LPLVGGHEGAGVVVGMGENVK;SANLMAGHWVAISGAAGGLGSLAVQYAK;SIGGEVFIDFTK;SIGGEVFIDFTKEK;SIGGEVFIDFTKEKDIVGAVLK;SISIVGSYVGNR;SPIKVVGLSTLPEIYEK;VLGIDGGEGK;VLGIDGGEGKEELFR;VVGLSTLPEIYEK;VVGLSTLPEIYEKMEK;YSGVCHTDLHAWHGDWPLPVK	18	18	19	21	19	14	14	15	16	16	59.5	57.5	64.4	67.8	59.5	22	22	36	27	39		8.5468	9.95563	0	310.92	470	36.849	4.4679	-0.706799	26.0977	26.0537	26.1281	25.7256	25.6456	25.6546	26.8422	26.7494	26.8082	26.6826	26.5976	26.5317
Color [DarkGray]	1	4	P10081	P10081	ATP-dependent RNA helicase eIF4A	TIF1	IF4A_YEAST ATP-dependent RNA helicase eIF4A OS=Saccharomyces cerevisiae (strain ATCC 204508 / S288c) OX=559292 GN=TIF1 PE=1 SV=3	AIMPIIEGHDVLAQAQSGTGK;APQALMLAPTR;DAQIVVGTPGR;ELALQIQK;FDDMELDENLLR;FTVSAIYSDLPQQER;FYSTQIEELPSDIATLLN;GIDVQQVSLVINYDLPANK;GIDVQQVSLVINYDLPANKENYIHR;GVFGYGFEEPSAIQQR;ILISTDLLAR;KDELTLEGIK;MFILDEADEMLSSGFK;SEGITDIEESQIQTNYDK	8	4	9	11	9	8	4	9	11	9	32.2	13.9	30.1	37.5	32.2	2	1	10	7	9		6.91866	8.33369	0	42.605	94	44.697	3.28118	-0.720431	20.7793	20.6095	20.8428	19.8667	19.2552	19.8824	21.4532	21.4888	21.4508	21.6791	21.6028	21.6594
Color [DarkGray]	1	4	P00360	P00360	Glyceraldehyde-3-phosphate dehydrogenase 1	TDH1	G3P1_YEAST Glyceraldehyde-3-phosphate dehydrogenase 1 OS=Saccharomyces cerevisiae (strain ATCC 204508 / S288c) OX=559292 GN=TDH1 PE=1 SV=3	DIEVVAVNDPFISNDYAAYMVK;DPANLPWGSLK;EATYDQIK;EATYDQIKK;ELDTAQKHIDAGAK;GTVSHDDKHIIIDGVK;HIDAGAKK;IATYQER;IATYQERDPANLPWGSLK;IDVAVDSTGVFK;IDVAVDSTGVFKELDTAQK;IVSNASCTTNCLAPLAK;KDIEVVAVNDPFISNDYAAYMVK;LISWYDNEYGYSAR;LTGMAFRVPTVDVSVVDLTVK;TASGNIIPSSTGAAK;TVDGPSHKDWR;VINDAFGIEEGLMTTVHSMTATQK;VLPELQGK;VPTVDVSVVDLTVK;VVDLIEYVAK;VVDLIEYVAKA;YKGTVSHDDKHIIIDGVK	12	12	13	13	13	12	12	13	13	13	64.8	65.1	64.8	65.1	65.1	10	11	23	21	24		7.82751	9.46941	0	175.84	274	35.75	3.30056	-0.738171	24.6054	24.81	24.7971	24.0326	24.0876	24.0164	25.4469	25.4495	25.5306	25.4391	25.4391	25.4514
Color [DarkGray]	1	4	P33299	P33299	26S protease regulatory subunit 7 homolog	RPT1	PRS7_YEAST 26S proteasome regulatory subunit 7 homolog OS=Saccharomyces cerevisiae (strain ATCC 204508 / S288c) OX=559292 GN=RPT1 PE=1 SV=1	KVEFSLPDLEGR;LKQTENDLKDIEAR;VIGSELVQK	0	1	2	1	3	0	1	2	1	3	0	2.6	5.6	1.9	7.5	0	0	1	1	1		5.53138	7.45989	0	2.908	10	51.982	0.257308	-0.802314	17.1816	19.7166	21.4458	19.3944	19.3334	17.196	20.2677	20.3634	20.1198	19.6766	20.2544	20.308
Color [DarkGray]	1	4	P00950	P00950	Phosphoglycerate mutase 1	GPM1	PMG1_YEAST Phosphoglycerate mutase 1 OS=Saccharomyces cerevisiae (strain ATCC 204508 / S288c) OX=559292 GN=GPM1 PE=1 SV=3	ADRLWIPVNR;AIQTANIALEK;AIQTANIALEKADR;DKAETLKK;FGEEKFNTYR;HGQSEWNEK;HLEGISDADIAK;HYGDLQGK;HYGDLQGKDK;KVYPDVLYTSK;LLPYWQDVIAK;LNIPTGIPLVFELDENLKPSKPSYYLDPEAAAAGAAAVANQGK;NLFTGWVDVK;RSFDVPPPPIDASSPFSQK;SFDVPPPPIDASSPFSQK;SFDVPPPPIDASSPFSQKGDER;TVMIAAHGNSLR;VYPDVLYTSK;YKYVDPNVLPETESLALVIDR;YVDPNVLPETESLALVIDR	12	17	19	19	19	12	17	19	19	19	64	76.1	76.5	80.6	76.5	8	9	22	19	26		8.34598	9.54082	0	104.56	259	27.608	3.62664	-0.805257	24.0613	24.0863	23.9577	23.0223	23.0818	23.1554	24.7406	24.8711	24.9092	24.9009	24.8073	24.7831
Color [DarkGray]	1	4	P41939	P41939	Isocitrate dehydrogenase [NADP] cytoplasmic	IDP2	IDHC_YEAST Isocitrate dehydrogenase [NADP] cytoplasmic OS=Saccharomyces cerevisiae (strain ATCC 204508 / S288c) OX=559292 GN=IDP2 PE=1 SV=2	ATDVIVPEEGELR;DQTNDQVTVDSATATLK;ETSTNSIASIFAWTR;FESLGIWYEHR;FGQILESATVNTVQEDGIMTK;FKDVFEAMYAR;GKLDNTPDVVK;HAFGDQYK;KLPLYSTTK;LDNTPDVVK;LIDDMVAQMLK;LVPQWEKPIIIGR;NILGGTVFREPIIIPR;SGTHDVDLK;TFESEAAHGTVTR;VANPIVEMDGDEQTR;VFDYPEHGGVAMMMYNTTDSIEGFAK	9	7	15	14	15	7	7	14	13	13	27.4	21.4	50.5	44.7	44.7	2	4	12	13	18		7.21519	8.80232	0	256.13	144	46.562	2.0334	-0.818335	22.311	22.7165	22.8846	22.6694	22.42	22.4645	23.4511	23.5189	23.397	23.3511	23.4448	23.5819
Color [DarkGray]	1	4	P32589;P32590	P32589	Heat shock protein homolog SSE1	SSE1	HSP7F_YEAST Heat shock protein homolog SSE1 OS=Saccharomyces cerevisiae (strain ATCC 204508 / S288c) OX=559292 GN=SSE1 PE=1 SV=4	DFDLAITEHFADEFK;GIDIVVNEVSNR;IIGLDYHHPDFEQESK;STPSVVGFGPK;YEELASLGNIIR;YIAKYEELASLGNIIR	1	2	5	2	2	1	2	5	2	2	1.6	3.3	9.5	3.3	3.3	0	1	4	0	1		5.82909	7.43731	0	5.1281	20	77.365	0.499104	-0.845149	19.1185	17.0146	19.3297	19.7718	15.6966	19.3215	19.3781	19.3389	19.2812	19.3722	19.6108	19.9092
Color [DarkGray]	1	4	P32558	P32558	FACT complex subunit SPT16	SPT16	SPT16_YEAST FACT complex subunit SPT16 OS=Saccharomyces cerevisiae (strain ATCC 204508 / S288c) OX=559292 GN=SPT16 PE=1 SV=1	LFDDVIALINSAGK;YFADAIAEASNGLLTVENTFR;YNEFEGSPNSLLFVLGSSNAENPYQK	0	2	3	1	2	0	2	3	1	2	0	3.9	5.9	1.4	3.4	0	1	4	0	2		5.23241	6.93139	0	9.9874	17	118.63	0.447871	-0.861306	15.6824	17.9262	18.2023	18.633	18.5983	18.429	17.7128	18.4459	18.2362	17.8896	18.1045	17.8927
Color [DarkGray]	1	4	P39983	P39983	Uncharacterized protein YEL057C	YEL057C	YEG7_YEAST Uncharacterized protein YEL057C OS=Saccharomyces cerevisiae (strain ATCC 204508 / S288c) OX=559292 GN=YEL057C PE=4 SV=1	GWSSQLKNLLGIYSK	1	1	1	1	1	1	1	1	1	1	6.4	6.4	6.4	6.4	6.4	0	0	1	1	0		7.54494	8.74906	0.0034662	1.9621	6	27.228	2.13082	-0.879939	24.4844	24.1624	23.9648	23.6258	24.7021	24.1527	25.1926	25.1503	24.9086	25.1709	25.4795	24.8512
Color [DarkGray]	1	4	P08067	P08067	Cytochrome b-c1 complex subunit Rieske, mitochondrial	RIP1	UCRI_YEAST Cytochrome b-c1 complex subunit Rieske, mitochondrial OS=Saccharomyces cerevisiae (strain ATCC 204508 / S288c) OX=559292 GN=RIP1 PE=1 SV=1	KGPAPLNLEIPAYEFDGDKVIVG;LGIRSSVKTCFK;STVETFISSMTATADVLAMAK	0	1	3	0	1	0	1	3	0	1	0	10.7	26	0	10.7	0	0	1	0	0		4.97913	7.32952	0.0034904	1.9837	7	23.365	0.303785	-0.89254	17.6036	17.5302	20.1196	19.8647	19.8797	19.9305	17.6319	20.1047	20.1945	19.8257	19.8355	19.6292
Color [DarkGray]	1	4	Q12447	Q12447	Polyamine N-acetyltransferase 1	PAA1	PAA1_YEAST Polyamine N-acetyltransferase 1 OS=Saccharomyces cerevisiae (strain ATCC 204508 / S288c) OX=559292 GN=PAA1 PE=1 SV=1	ASSSSTLPLHMYIRPLIIEDLK;IIAENTNVAK;IVLIAHEPLIPFYER;NLATLLLTDYIQK	0	0	2	1	2	0	0	2	1	2	0	0	13.1	6.8	12	0	0	0	0	0		5.79523	7.15933	0	11.229	8	21.947	0.397924	-0.91674	16.3485	19.2727	19.1407	17.9705	16.8301	16.9451	19.5169	18.8235	19.1718	19.7044	19.2257	16.8654
Color [DarkGray]	1	4	Q12189	Q12189	Ribose-5-phosphate isomerase	RKI1	RPIA_YEAST Ribose-5-phosphate isomerase OS=Saccharomyces cerevisiae (strain ATCC 204508 / S288c) OX=559292 GN=RKI1 PE=1 SV=1	IDALESLGNPLEDAKR;QGVPIEIVPSSYVR	0	0	0	1	1	0	0	0	1	1	0	0	0	6.2	6.2	0	0	0	0	1		4.61456	6.77947	0.0037037	2.3409	1	28.258	0.392496	-0.917773	16.8877	17.104	17.1131	16.4778	16.4037	16.492	19.7658	16.3826	17.7097	20.3437	20.0281	19.7883
Color [DarkGray]	1	4	P34760;Q04120	P34760	Peroxiredoxin TSA1	TSA1	TSA1_YEAST Peroxiredoxin TSA1 OS=Saccharomyces cerevisiae (strain ATCC 204508 / S288c) OX=559292 GN=TSA1 PE=1 SV=3	DYGVLIEEEGVALR;EYFEAANK;GLFIIDPK;HITINDLPVGR;KEGGLGPINIPLLADTNHSLSR;KFEEQGAQVLFASTDSEYSLLAWTNIPR;TAVVDGVFDEVSLDKYK	4	6	6	6	7	4	6	6	6	7	25.5	51	51	51	55.1	2	5	5	5	8		7.24242	8.63115	0	44.379	74	21.589	3.26512	-0.949582	22.2565	22.1347	21.9802	22.6001	22.5935	22.8864	23.1712	23.0393	23.0096	22.9573	22.8524	23.2086
Color [DarkGray]	1	4	P38715	P38715	NADPH-dependent aldose reductase GRE3	GRE3	GRE3_YEAST NADPH-dependent aldose reductase GRE3 OS=Saccharomyces cerevisiae (strain ATCC 204508 / S288c) OX=559292 GN=GRE3 PE=1 SV=1	SIGVSNFQGSLIQDLLR	0	0	1	1	1	0	0	1	1	1	0	0	5.2	5.2	5.2	0	0	0	0	1		4.99298	6.3547	0	3.4763	4	37.118	2.11959	-0.951094	17.1595	17.105	17.1133	16.1591	16.1812	16.1593	17.7014	18.2125	18.3171	18.1696	16.6044	16.2986
Color [DarkGray]	1	4	P47018	P47018	Maintenance of telomere capping protein 1	MTC1	MTC1_YEAST Maintenance of telomere capping protein 1 OS=Saccharomyces cerevisiae (strain ATCC 204508 / S288c) OX=559292 GN=MTC1 PE=1 SV=1	FDQVLSSQVEGGIR;ISDLFISILPIAIPQK;LAQEQLDLTSK;LFNTAHEEYQK	0	0	2	1	1	0	0	2	1	1	0	0	5.6	3.3	3.3	0	0	2	0	0		5.12051	6.61187	0	2.9364	14	53.477	2.26777	-0.95764	16.5879	17.1486	17.014	15.6733	16.4459	18.1469	17.7972	17.9513	17.8748	18.2781	18.4714	17.8323
Color [DarkGray]	1	4	P15202	P15202	Peroxisomal catalase A	CTA1	CATA_YEAST Peroxisomal catalase A OS=Saccharomyces cerevisiae (strain ATCC 204508 / S288c) OX=559292 GN=CTA1 PE=1 SV=1	IGEHGPLLLQDYNLIDSLAHFNR	0	0	1	0	0	0	0	1	0	0	0	0	4.5	0	0	0	0	1	0	0		5.03371	6.43164	0.0081566	1.5891	1	58.555	2.31147	-0.964896	15.9907	16.3716	16.367	16.7811	15.512	17.8595	16.9765	17.3204	17.3271	16.1682	17.4843	17.3049
Color [DarkGray]	1	4	P53131	P53131	Pre-mRNA-splicing factor ATP-dependent RNA helicase PRP43	PRP43	PRP43_YEAST Pre-mRNA-splicing factor ATP-dependent RNA helicase PRP43 OS=Saccharomyces cerevisiae (strain ATCC 204508 / S288c) OX=559292 GN=PRP43 PE=1 SV=1	ALEELNYLACLDDEGNLTPLGR;DEFLKLYQNNQIMVFVGETGSGK;FSSEHPDPVETSIPEQAAEIAEELSK;YFNDAPLLAVPGR	1	0	1	1	0	1	0	1	1	0	3	0	3	3	0	0	0	0	0	0		3.78541	6.88286	0.0096463	1.5348	4	87.561	0.50999	-0.995933	19.2778	19.0841	16.6398	15.914	18.8757	19.4805	19.1895	19.2628	19.5371	16.9644	19.0527	18.9541
Color [DarkGray]	1	4	P00128	P00128	Cytochrome b-c1 complex subunit 7	QCR7	QCR7_YEAST Cytochrome b-c1 complex subunit 7 OS=Saccharomyces cerevisiae (strain ATCC 204508 / S288c) OX=559292 GN=QCR7 PE=1 SV=2	AHQTELTHHLLPR;AQEDVPYLLPYILEAEAAAK;FDDLIAEENPIMQTALR	1	1	3	2	1	1	1	3	2	1	15.7	15.7	39.4	29.1	15.7	1	1	2	0	1		6.36144	7.37491	0	6.9027	22	14.565	1.67937	-1.01816	19.3047	19.1304	19.1497	19.9057	17.1093	19.6493	20.114	20.7223	19.803	20.1804	19.5138	20.2069
Color [DarkGray]	1	4	P07149	P07149	Fatty acid synthase subunit beta;3-hydroxyacyl-[acyl-carrier-protein] dehydratase;Enoyl-[acyl-carrier-protein] reductase [NADH];[Acyl-carrier-protein] acetyltransferase;[Acyl-carrier-protein] malonyltransferase;S-acyl fatty acid synthase thioesterase	FAS1	FAS1_YEAST Fatty acid synthase subunit beta OS=Saccharomyces cerevisiae (strain ATCC 204508 / S288c) OX=559292 GN=FAS1 PE=1 SV=2	ALDTVTNVLNFIK;ATSSTDEESWFK;DIQIPVYDTFDGSDLR;LLKENIIQMEMIENRTMDGK	0	0	1	1	1	0	0	1	1	1	0	0	0.6	0.6	0.6	0	0	1	1	1		4.95061	6.96345	0	4.4194	13	228.69	0.588994	-1.02505	18.5773	18.5338	16.2527	17.2931	17.655	19.6846	18.6147	19.0324	18.7919	19.3214	19.3912	18.936
Color [DarkGray]	1	4	P41940	P41940	Mannose-1-phosphate guanyltransferase	PSA1	MPG1_YEAST Mannose-1-phosphate guanyltransferase OS=Saccharomyces cerevisiae (strain ATCC 204508 / S288c) OX=559292 GN=PSA1 PE=1 SV=2	DFLSGTVLYLNSLAK;ETFPILVEEK;GLILVGGYGTR;IGPDVVIGPNVTIGDGVR;LAEDVLK;QLYSFDLEGFWMDVGQPK	1	1	6	1	1	1	1	6	1	1	4.2	4.2	21.9	4.2	5	1	0	6	1	1	+	6.2721	7.61451	0	9.9642	24	39.565	3.37654	-1.04826	18.9198	19.2177	19.1389	17.6259	18.4955	18.2095	20.2162	20.1176	20.0875	19.9274	20.4567	20.03
Color [DarkGray]	1	4	P40510	P40510	D-3-phosphoglycerate dehydrogenase 2	SER33	SER33_YEAST D-3-phosphoglycerate dehydrogenase 2 OS=Saccharomyces cerevisiae (strain ATCC 204508 / S288c) OX=559292 GN=SER33 PE=1 SV=1	SVAELVIGEIISLAR	0	0	1	1	1	0	0	1	1	1	0	0	3.2	3.2	3.2	0	0	1	0	1		4.77552	6.11793	0	2.952	2	51.188	1.18441	-1.06713	15.8497	15.8324	16.9535	15.6056	17.1916	16.8164	16.8736	17.4329	17.5304	16.9827	16.5886	16.7093
Color [DarkGray]	1	4	P31373	P31373	Cystathionine gamma-lyase	CYS3	CYS3_YEAST Cystathionine gamma-lyase OS=Saccharomyces cerevisiae (strain ATCC 204508 / S288c) OX=559292 GN=CYS3 PE=1 SV=2	IAEFLAADKENVVAVNYPGLK;ISVGIEDTDDLLEDIKQALK	0	0	0	1	1	0	0	0	1	1	0	0	0	5.1	5.1	0	0	0	1	1		5.30348	6.5076	0	4.6867	9	42.542	0.418984	-1.09835	15.507	17.7985	16.7769	16.742	16.4305	15.5779	19.0236	18.3117	16.0422	18.9287	19.1612	18.5844
Color [DarkGray]	1	4	P02992	P02992	Elongation factor Tu, mitochondrial	TUF1	EFTU_YEAST Elongation factor Tu, mitochondrial OS=Saccharomyces cerevisiae (strain ATCC 204508 / S288c) OX=559292 GN=TUF1 PE=1 SV=1	DLNKPFLMPVEDIFSISGR;ELLNEYGFDGDNAPIIMGSALCALEGR;LLDAVDEYIPTPER	0	0	2	1	1	0	0	2	1	1	0	0	10.5	4.3	4.3	0	0	1	1	2		4.49962	6.77798	0	2.9997	13	47.972	1.19375	-1.14317	16.2798	16.3096	17.6248	16.7802	14.6924	14.6601	18.0358	17.8108	17.7971	18.3999	18.8009	17.816
Color [DarkGray]	1	4	Q12335	Q12335	Protoplast secreted protein 2	PST2	PST2_YEAST Protoplast secreted protein 2 OS=Saccharomyces cerevisiae (strain ATCC 204508 / S288c) OX=559292 GN=PST2 PE=1 SV=1	ALGGAPKPDYPIATQDTLTEYDAFLFGIPTR;FGNFPAQWK;GIEAAGGSADIYQVEETLSPEVVK;KGIEAAGGSADIYQVEETLSPEVVK;NVFAELTNMDEVHGGSPWGAGTIAGSDGSR;SPSALELQVHEIQGK;VAGCFVSTGTGGGNEATIMNSLSTLAHHGIIFVPLGYK	3	2	5	4	6	3	2	5	4	6	35.4	27.8	69.7	50.5	74.2	2	1	5	5	5	+	6.57514	8.11277	0	56.922	50	20.965	2.84733	-1.19178	20.8811	20.8183	20.4305	20.8461	20.9401	20.8976	21.9351	21.7917	21.9785	21.5441	21.6358	21.3909
Color [DarkGray]	1	4	P37291	P37291	Serine hydroxymethyltransferase, cytosolic	SHM2	GLYC_YEAST Serine hydroxymethyltransferase, cytosolic OS=Saccharomyces cerevisiae (strain ATCC 204508 / S288c) OX=559292 GN=SHM2 PE=1 SV=2	AKVDEGSDVLNTWKK;AVEFAQQVQQSLPK;EIYDWAGEYPLAV;GMGEEDFHR;IGAPAMTTR;LITSHLVDTDPEVDSIIKDEIER;VLVAGTSAYCR;VNPETGIIDYDTLEK;YSEGYPGAR	1	1	6	4	5	1	1	6	4	5	1.9	3	18.1	10.9	14.9	0	0	4	4	5	+	6.26385	7.90206	0	15.3	35	52.218	2.04822	-1.20374	19.8796	20.3547	20.6674	19.0309	19.1509	18.9686	21.7019	21.4811	21.3299	21.3144	21.7003	21.1864
Color [DarkGray]	1	4	P31412	P31412	V-type proton ATPase subunit C	VMA5	VATC_YEAST V-type proton ATPase subunit C OS=Saccharomyces cerevisiae (strain ATCC 204508 / S288c) OX=559292 GN=VMA5 PE=1 SV=4	ATALYTANDFILISLPQNAQPVTAPGSK;IGSLDTLIVESEELSKVDNQIGASIGK;NVQEFTTAAR	0	0	2	1	2	0	0	2	1	2	0	0	9.4	2.6	9.4	0	0	1	0	1		5.46013	7.04411	0	9.035	7	44.188	0.734204	-1.23931	18.1747	18.4965	16.5377	15.437	15.1845	14.9859	19.4292	19.4821	18.0155	18.8315	19.1334	18.7168
Color [DarkGray]	1	4	P25336	P25336	DNA mismatch repair protein MSH3	MSH3	MSH3_YEAST DNA mismatch repair protein MSH3 OS=Saccharomyces cerevisiae (strain ATCC 204508 / S288c) OX=559292 GN=MSH3 PE=1 SV=2	AFSISEELRK;ESINEDALK;GLTYNSYGMNVAK;IHMLLDPNSLQSLDIFTHDGGK;ILGDTNSIWALSR;IQLSPSLIR;RSDENVEAEDDEEEGEEDFVK;RSDENVEAEDDEEEGEEDFVKK;SQLKEELAEIRK;TSGTSTTFNDIDFAK;YLQPIEVLVNTDDLPLHVAK	0	7	0	0	0	0	7	0	0	0	0	10.1	0	0	0	0	6	0	0	0		5.34149	7.39679	0	50.785	18	116.53	1.52563	-1.24223	16.1302	16.4033	16.3881	21.2693	21.2956	21.2478	16.8615	18.1066	17.6803	16.3945	16.4154	16.9768
Color [DarkGray]	1	4	P09201	P09201	Fructose-1,6-bisphosphatase	FBP1	F16P_YEAST Fructose-1,6-bisphosphatase OS=Saccharomyces cerevisiae (strain ATCC 204508 / S288c) OX=559292 GN=FBP1 PE=1 SV=2	AELVNLVGLAGASNFTGDQQK;AIYSINEGNTLYWNETIR;DSTEGFDTDIITLPR;FIIEHQK;ILDLVPSHIHDK;KLDVLGDEIFINAMR;LLPDSSGTINDVLR;NATGDFTLVLNALQFAFK;RAELVNLVGLAGASNFTGDQQK;RDSTEGFDTDIITLPR;SSIWLGSSGEIDKFLDHIGK;TFLYGGLFAYPCDKK;YVGSMVADVHR	6	5	11	12	12	6	5	11	12	12	16.4	17	44	44	44	1	3	14	13	11	+	7.13101	8.57687	0	63.519	127	38.262	3.37414	-1.25638	21.8967	21.7989	21.5094	21.0512	20.0087	19.7829	22.9707	23.0013	23.0021	23.171	23.1372	23.124
Color [DarkGray]	1	4	P32316	P32316	Acetyl-CoA hydrolase	ACH1	ACH1_YEAST Acetyl-CoA hydrolase OS=Saccharomyces cerevisiae (strain ATCC 204508 / S288c) OX=559292 GN=ACH1 PE=1 SV=2	AFANWENFK;AIAGHLVEFFR;AVPEALIDHVEK;CGVDSIPVDPEKVVAIVESTMR;EAHELIPLFK;FHTNLAEK;FNLFVGASAGPEENR;ILDYTIIEATAIK;ILDYTIIEATAIKEDGSIVPGPSVGGSPEFITVSDK;LGVIAMNTPVEVDIYAHANSTNVNGSR;LPENLLPLQSGIGNIANAVIEGLAGAQFK;LSIMHAPSARPTK;MLNGLGGSADFLR;SQVVSNNPEMIR;SQVVSNNPEMIRR;VDDKCGVDSIPVDPEK;VDPTGISTIVPMASHVDQTEHDLDILVTDQGLADLR;VIIEVNTATPSFEGIHDIDMPVNPPFR;VKEAHELIPLFK	2	1	6	10	16	2	1	6	10	16	3.6	1.7	21.1	31.2	49.8	2	0	3	4	15	+	6.56334	8.26618	0	58.507	65	58.711	2.49249	-1.25861	20.2025	20.4819	20.7231	18.4788	15.9836	18.9593	21.5386	21.6659	21.9788	22.4352	22.106	22.3422
Color [DarkGray]	1	4	P54115	P54115	Magnesium-activated aldehyde dehydrogenase, cytosolic	ALD6	ALDH6_YEAST Magnesium-activated aldehyde dehydrogenase, cytosolic OS=Saccharomyces cerevisiae (strain ATCC 204508 / S288c) OX=559292 GN=ALD6 PE=1 SV=4	AFHDTEWATQDPR;AGTVWINTYNDFDSR;AYLETEIK;GYFIRPTVFYDVNEDMR;IVKEEIFGPVVTVAK;IYVQEGIYDELLAAFK;LADELESQIDLVSSIEALDNGK;QQFDTIMNYIDIGKK;SAHLVFDDANIKK;SVAVDSSESNLK;TVGAALTNDPR;VGIPAGVVNIVPGPGR	2	3	6	7	11	2	3	6	7	11	5.8	8	18.8	19.4	31.4	0	0	5	6	9		6.4312	8.1487	0	41.973	74	54.414	1.54968	-1.26505	19.6763	20.7155	20.8542	20.0633	19.7402	18.5541	21.6181	21.6281	21.7949	21.9574	21.8094	21.711
Color [DarkGray]	1	4	P53912	P53912	Uncharacterized protein YNL134C		YNN4_YEAST Uncharacterized protein YNL134C OS=Saccharomyces cerevisiae (strain ATCC 204508 / S288c) OX=559292 GN=YNL134C PE=1 SV=1	FAIGDYIYGVIHGASVR	0	0	1	0	1	0	0	1	0	1	0	0	4.5	0	4.5	0	0	1	0	1		5.09311	6.32356	0.001912	2.6164	6	41.164	1.00226	-1.2874	15.9784	15.8932	16.6777	16.8937	15.8705	16.5018	16.9929	16.8533	18.5655	18.7251	19.1359	18.2002
Color [DarkGray]	1	4	P53633	P53633	Prenylated Rab acceptor 1	YIP3	PRA1_YEAST Prenylated Rab acceptor 1 OS=Saccharomyces cerevisiae (strain ATCC 204508 / S288c) OX=559292 GN=YIP3 PE=1 SV=2	FTQNFSMENIK;FTQNFSMENIKSEFQSLQSK;ISKPQNFGEVQSR;KISKPQNFGEVQSR;LKGEELVTPFGSFK;MNQLGALAQVSR;TPQEFFNFKK	2	2	2	5	3	2	2	2	5	3	15.3	15.3	15.3	33.5	26.7	0	1	2	5	1		6.3424	7.81755	0	5.6426	26	19.411	1.20765	-1.29058	19.5281	20.713	20.7157	20.7147	19.9502	20.3263	21.265	21.3362	22.2274	20.7336	21.0293	20.977
Color [DarkGray]	1	4	P17967	P17967	Protein disulfide-isomerase	PDI1	PDI_YEAST Protein disulfide-isomerase OS=Saccharomyces cerevisiae (strain ATCC 204508 / S288c) OX=559292 GN=PDI1 PE=1 SV=2	ALYEEAQEK;GVVIEGYPTIVLYPGGK;SQEIFENQDSSVFQLVGK	0	0	0	0	2	0	0	0	0	2	0	0	0	0	6.7	0	0	0	0	0		5.40035	6.84751	0	3.4784	4	58.226	0.533886	-1.30907	17.9039	16.5837	18.2055	16.4222	17.544	16.3782	16.9601	19.9532	19.7069	19.5402	19.5638	19.578
Color [DarkGray]	1	4	P07259	P07259	Protein URA2;Glutamine-dependent carbamoyl-phosphate synthase;Aspartate carbamoyltransferase	URA2	PYR1_YEAST Protein URA2 OS=Saccharomyces cerevisiae (strain ATCC 204508 / S288c) OX=559292 GN=URA2 PE=1 SV=5	DGTVLQGYSFGAEK;EKQELLSSVQK;ELVAPGAIQNLIR;GHNIPCTSTISGR;HIELQTGPDGK;SDFHVLFAVAQELR;TITLPGLINIATYVPNASHVIK;VLGTPIDTIITTEDRELFSNAIDEINEK;VNEIKEEVDYDHR;VTALFLPLR;WLQNEGIPAVYGVDTR	1	2	6	5	6	1	2	6	5	6	0.6	1.9	4.5	3.1	3.9	0	0	6	3	6	+	5.77585	7.98737	0	22.623	45	245.04	3.36207	-1.32482	20.3253	19.9922	20.3552	19.9741	19.9641	19.1653	21.4635	21.5881	21.5955	21.7536	22.0404	22.2063
Color [DarkGray]	1	4	P08524	P08524	Farnesyl pyrophosphate synthase	ERG20	FPPS_YEAST Farnesyl pyrophosphate synthase OS=Saccharomyces cerevisiae (strain ATCC 204508 / S288c) OX=559292 GN=ERG20 PE=1 SV=2	EACDWYAHSLNYNTPGGK;GLSVVDTYAILSNK	0	0	1	1	1	0	0	1	1	1	0	0	4	5.1	4	0	0	1	1	1		5.6106	6.98469	0	7.8404	10	40.483	0.571231	-1.3249	16.3422	17.2817	17.608	17.459	15.8853	19.426	19.3794	19.3436	16.4836	19.5696	15.9625	19.4507
Color [DarkGray]	1	4	P53172	P53172	Protein SDS23	SDS23	SDS23_YEAST Protein SDS23 OS=Saccharomyces cerevisiae (strain ATCC 204508 / S288c) OX=559292 GN=SDS23 PE=1 SV=2	ISSIAVVDPQGNLIGNISVTDVK;LIGVVSLTDILSVLAR;LPETENLSTVIGILGSGVHR;SFPNLKPLLDSSLEELNIGVLNAAR	0	0	4	2	4	0	0	4	2	4	0	0	15.9	6.8	15.9	0	0	3	1	2		5.51825	7.37555	0	8.0555	26	58.097	0.827365	-1.32597	17.1012	19.3544	17.1958	15.2071	19.5882	18.9272	19.4128	19.0965	19.1199	19.6012	19.7046	19.3298
Color [DarkGray]	1	4	P22768	P22768	Argininosuccinate synthase	ARG1	ASSY_YEAST Argininosuccinate synthase OS=Saccharomyces cerevisiae (strain ATCC 204508 / S288c) OX=559292 GN=ARG1 PE=1 SV=3	AHVDLEGLTLDKEVR;EVSVTKPLDVFLAASNLAR;LIYNGSYFTPECEYIR	1	0	2	3	2	1	0	2	3	2	4.5	0	8.1	11.9	8.1	0	0	1	3	1	+	4.2544	7.47241	0	11.495	17	46.927	2.39059	-1.33693	19.6459	18.9076	19.4954	16.4684	18.9044	15.6346	20.7041	20.6964	20.6592	20.5951	20.8035	20.1372
Color [DarkGray]	1	4	P22133	P22133	Malate dehydrogenase, cytoplasmic	MDH2	MDHC_YEAST Malate dehydrogenase, cytoplasmic OS=Saccharomyces cerevisiae (strain ATCC 204508 / S288c) OX=559292 GN=MDH2 PE=1 SV=2	AQLQYQLK;DANNFPIAPGADQLLPLVDGADYFAIPLTITTK;DDLFNVNAGIISQLGDSIAECCDLSK;GSATLSMAHAGYK;GVSYVDYDIVNR;IAILGAAGGIGQSLSLLLK;NQMLPICVSQLK;NQMLPICVSQLKK;PHSVTPSIEQDSLK;VFVLVISNPVNSLVPVMVSNILK;VNSMPDVPVIGGHSGETIIPLFSQSNFLSR;VQYGGDEVVK	3	6	10	10	12	3	6	10	10	12	15.1	23.9	44.6	45.1	53.3	3	8	13	8	13	+	7.17047	8.61077	0	94.969	137	40.73	4.19813	-1.34787	21.3513	21.4131	21.5527	21.1682	20.9477	21.3141	22.8253	22.8462	22.6892	22.7377	22.7886	22.8192
Color [DarkGray]	1	4	P34730	P34730	Protein BMH2	BMH2	BMH2_YEAST Protein BMH2 OS=Saccharomyces cerevisiae (strain ATCC 204508 / S288c) OX=559292 GN=BMH2 PE=1 SV=3	AVASSGQELSVEER;DSTLIMQLLR;EDSVYLAK;ISDDILSVLDSHLIPSATTGESK;IVSSIEQKEESK;LAEQAERYEEMVENMK;QAFDDAIAELDTLSEESYK;QAFDDAIAELDTLSEESYKDSTLIMQLLR;SEHQVELIR;SKIETELTK;SQTREDSVYLAK;TASEIATTELPPTHPIR;YLAEFSSGDAR	1	1	2	3	3	1	1	2	3	3	9.2	24.9	54.2	52	47.3	1	1	2	2	6	+	6.84131	8.01741	0	41.413	31	31.061	3.03981	-1.38781	20.9951	20.4547	20.735	20.2055	19.8529	20.1762	22.0855	22.1552	22.1075	22.2166	22.1899	22.1981
Color [DarkGray]	1	4	P23542	P23542	Aspartate aminotransferase, cytoplasmic	AAT2	AATC_YEAST Aspartate aminotransferase, cytoplasmic OS=Saccharomyces cerevisiae (strain ATCC 204508 / S288c) OX=559292 GN=AAT2 PE=1 SV=3	ASIAGLNQGNVEYVAK;LIHNDSSYNHEYLGITGLPSLTSNAAK;LSTVSPVFVCQSFAK;SATLFNNIELLPPDALFGIK;SEVSNPPAYGAK;SLDLNGFLNAIQK	1	0	3	4	5	1	0	3	4	5	3.8	0	11.7	18.2	21.1	0	0	3	2	5		6.06603	7.48916	0	20.588	32	46.057	1.12911	-1.43906	18.7302	17.8205	19.8657	16.7098	16.0922	16.8805	20.1604	20.1366	20.4365	21.1689	20.362	21.0902
Color [DarkGray]	1	4	P40185	P40185	Protein MMF1, mitochondrial	MMF1	MMF1_YEAST Protein MMF1, mitochondrial OS=Saccharomyces cerevisiae (strain ATCC 204508 / S288c) OX=559292 GN=MMF1 PE=1 SV=1	NILAESNSSLDNIVK	0	1	1	1	1	0	1	1	1	1	0	10.3	10.3	10.3	10.3	0	0	1	1	1		6.55364	7.50788	0	7.3002	9	15.908	0.568751	-1.44481	17.5763	20.8617	21.0562	20.4545	20.1763	20.2259	21.2248	21.3154	21.2884	20.9936	20.7942	21.1707
Color [DarkGray]	1	4	P16862	P16862	ATP-dependent 6-phosphofructokinase subunit beta	PFK2	PFKA2_YEAST ATP-dependent 6-phosphofructokinase subunit beta OS=Saccharomyces cerevisiae (strain ATCC 204508 / S288c) OX=559292 GN=PFK2 PE=1 SV=4	AAEENFNADDKTISDTAAVVGVK;AIAVMTSGGDAPGMNSNVR;AIDYVEATANSHSR;ILATLQGLEAVNAVLESTPDTPSPLIAVNENK;ITTLGHVQR;SSPDENSTLLSNDSISLK	0	0	2	1	5	0	0	2	1	5	0	0	5.7	0.9	10.1	0	0	2	0	4		5.23228	7.34871	0	30.624	24	104.62	0.561917	-1.47612	16.815	18.1783	20.7053	16.7321	16.6434	16.3671	19.5511	20.3135	20.2624	20.1618	19.8227	20.2097
Color [DarkGray]	1	4	P09624	P09624	Dihydrolipoyl dehydrogenase, mitochondrial	LPD1	DLDH_YEAST Dihydrolipoyl dehydrogenase, mitochondrial OS=Saccharomyces cerevisiae (strain ATCC 204508 / S288c) OX=559292 GN=LPD1 PE=1 SV=1	AAQLGFNTACVEKR;LGGTCLNVGCIPSK;NIIVATGSEVTPFPGIEIDEEKIVSSTGALSLK;SHDVVIIGGGPAGYVAAIK;VTPVDGLEGTVKEDHILDVK;VTVVEFQPQIGASMDGEVAK	1	0	3	6	4	1	0	3	6	4	3.8	0	14.4	24	14.6	0	0	4	4	3		5.40509	7.66542	0	17.864	36	54.009	0.669987	-1.48399	20.0971	20.4695	17.2931	15.6559	19.5171	15.5264	20.8481	20.8321	20.6316	20.423	20.3823	20.9308
Color [DarkGray]	1	4	P21524;P21672	P21524	Ribonucleoside-diphosphate reductase large chain 1	RNR1	RIR1_YEAST Ribonucleoside-diphosphate reductase large chain 1 OS=Saccharomyces cerevisiae (strain ATCC 204508 / S288c) OX=559292 GN=RNR1 PE=1 SV=2	AAPIVDDEETEFDIYNSK;DIEAALETYNLMSLK;DLFPALWIPDLFMK;DLVDLGIWDEGMK;IADQATENVADISNLK;IAISNLHK;LNSAIVYDRDFQYSYFGFK;SVYIDQSHSLNLFLR;TVWEISQK	3	3	1	7	8	3	3	1	7	8	4.6	4.7	1.6	11.6	13.3	1	2	0	4	7		6.00393	7.72946	0	245.44	43	99.56	1.15833	-1.49663	19.714	19.9393	18.0213	19.0111	20.3582	18.5937	20.7166	20.8152	20.6327	21.7832	21.8052	21.8076
Color [DarkGray]	1	4	P32599	P32599	Fimbrin	SAC6	FIMB_YEAST Fimbrin OS=Saccharomyces cerevisiae (strain ATCC 204508 / S288c) OX=559292 GN=SAC6 PE=1 SV=1	ALENTNYAVDLGR;IIVAGSQTGTTHTINEEERR;LLEDDETLEQFLR	0	0	0	1	2	0	0	0	1	2	0	0	0	2	5.1	0	0	0	1	3		4.9767	6.77082	0	3.4201	9	71.772	1.04608	-1.50207	17.253	18.144	16.8711	17.0457	16.8564	16.2576	17.8311	19.2683	19.6749	20.078	19.5354	18.9889
Color [DarkGray]	1	4	P80235	P80235	Putative mitochondrial carnitine O-acetyltransferase	YAT1	CACM_YEAST Putative mitochondrial carnitine O-acetyltransferase OS=Saccharomyces cerevisiae (strain ATCC 204508 / S288c) OX=559292 GN=YAT1 PE=1 SV=2	AGINFEHTGVDGHTVLR;GQFYWFDVLDTR;IQLLHDACTAHSQITR;LATDIYTDSILSFAR;NVVDIFSDDDGKPSSSSLASAAHSANLITIPR;TVLSAENLDALNTLHER	0	1	4	2	5	0	1	4	2	5	0	1.7	10.9	3.9	13.4	0	0	2	0	3		5.6299	7.64672	0	13.881	23	77.765	0.963377	-1.51023	16.7732	18.7794	19.0897	18.9989	19.8315	14.9813	19.508	19.8523	19.8127	20.195	20.2506	20.0154
Color [DarkGray]	1	4	P29311	P29311	Protein BMH1	BMH1	BMH1_YEAST Protein BMH1 OS=Saccharomyces cerevisiae (strain ATCC 204508 / S288c) OX=559292 GN=BMH1 PE=1 SV=4	ATNASLEAYK;DNLTLWTSDMSESGQAEDQQQQQQHQQQQPPAAAEGEAPK;DSTLIMQLLR;EDSVYLAK;ISDDILSVLDSHLIPSATTGESK;IVSSIEQKEESK;LAEQAERYEEMVENMK;QAFDDAIAELDTLSEESYK;QAFDDAIAELDTLSEESYKDSTLIMQLLR;SKIETELTK;STSREDSVYLAK;TASEIATTELPPTHPIR;TVASSGQELSVEER;YLAEFSSGDAR	1	4	12	11	13	0	0	2	3	4	4.1	22.1	55.8	63.3	63.7	0	1	11	8	16	+	7.29341	8.6672	0	71.205	106	30.091	2.0075	-1.51821	21.3055	22.2489	22.2555	22.0223	21.4672	21.5993	23.5376	23.2754	23.5514	23.5191	23.3392	23.697
Color [DarkGray]	1	4	P80210	P80210	Adenylosuccinate synthetase	ADE12	PURA_YEAST Adenylosuccinate synthetase OS=Saccharomyces cerevisiae (strain ATCC 204508 / S288c) OX=559292 GN=ADE12 PE=1 SV=3	ITKYEDLPENAKK;LQTIGAEFGVTTGR;LVDLLVGKYDIVAR;YIEDFVGVPVEWVGTGPAR	0	0	0	1	2	0	0	0	1	2	0	0	0	4.4	7.4	0	0	0	0	1		5.48606	6.98322	0	4.5595	7	48.279	0.728591	-1.5306	15.9431	19.0136	18.5617	16.6033	17.1925	16.4296	19.1919	19.3931	19.5253	19.3725	19.3568	19.4624
Color [DarkGray]	1	4	P53252	P53252	Sphingolipid long chain base-responsive protein PIL1	PIL1	PIL1_YEAST Sphingolipid long chain base-responsive protein PIL1 OS=Saccharomyces cerevisiae (strain ATCC 204508 / S288c) OX=559292 GN=PIL1 PE=1 SV=1	AAFNYQFDSIIEHSEK;AEAESLVAEAQLSNITR;APTASQLQNPPPPPSTTK;SAAGAFGPELSR	0	0	3	2	3	0	0	3	1	3	0	0	13.6	8.6	13.6	0	0	2	1	0		6.01355	7.32296	0	16.07	9	38.349	0.584835	-1.53732	16.0488	19.8244	19.1847	16.5883	19.3436	17.8944	19.7479	19.7933	20.1287	19.9614	19.5362	20.0875
Color [DarkGray]	1	4	Q06505	Q06505	Transcription factor SPN1	SPN1	IWS1_YEAST Transcription factor SPN1 OS=Saccharomyces cerevisiae (strain ATCC 204508 / S288c) OX=559292 GN=SPN1 PE=1 SV=1	ANLADTILDNNLLQSVR;IMQLEFDSEK	0	2	1	1	1	0	2	1	1	1	0	6.6	4.1	4.1	4.1	0	1	1	1	2		4.88162	7.723	0.0093168	1.3744	6	46.082	0.408642	-1.54126	16.9409	21.9803	21.3389	21.2869	16.7567	17.5337	21.9179	21.8042	21.1618	22.5987	17.8408	21.4766
Color [DarkGray]	1	4	P20424	P20424	Signal recognition particle subunit SRP54	SRP54	SRP54_YEAST Signal recognition particle subunit SRP54 OS=Saccharomyces cerevisiae (strain ATCC 204508 / S288c) OX=559292 GN=SRP54 PE=1 SV=2	ESSDFGAIILTK;LLGIGDIESLFEQLQTVSNKEDAK;VTPQMMQQAQQK	0	2	1	1	3	0	2	1	1	3	0	6.7	4.4	4.4	8.9	0	2	0	0	3	+	5.11341	6.89006	0	6.2817	11	59.624	1.43542	-1.60644	16.8253	17.061	16.1346	18.7528	19.5741	18.9337	18.6306	17.4058	18.8038	19.5029	19.5611	19.2211
Color [DarkGray]	1	4	P32787	P32787	Mitochondrial genome maintenance protein MGM101	MGM101	MG101_YEAST Mitochondrial genome maintenance protein MGM101 OS=Saccharomyces cerevisiae (strain ATCC 204508 / S288c) OX=559292 GN=MGM101 PE=1 SV=1	AFGAGGWGLVPR;CCKDLGVGSELWDPVFIKK;DIEIKPDGLIYLPEIK;DLGVGSELWDPVFIK;DLGVGSELWDPVFIKK;EYGLICHGQLISVAR;EYSSGINSK;FKVDHCTEK;FVEHVTTK;GDIDWYTSWYGLGMKPFEAK;GEQDYFNEAGIPTATEGCK;KSFNSTETKPVFATK;LGGTPLETR;SFNSTETKPVFATK;STADDSLNNSYK	1	15	1	1	1	1	15	1	1	1	7.1	60.6	3.3	5.6	5.6	0	22	0	0	0		7.52881	8.9985	0	198.56	60	30.09	0.660775	-1.63468	14.2345	16.9252	13.7122	25.9108	25.7978	24.9439	15.5711	17.2154	16.9895	17.0653	17.2644	16.8599
Color [DarkGray]	1	4	P08417	P08417	Fumarate hydratase, mitochondrial	FUM1	FUMH_YEAST Fumarate hydratase, mitochondrial OS=Saccharomyces cerevisiae (strain ATCC 204508 / S288c) OX=559292 GN=FUM1 PE=1 SV=2	AIQQAADEVASGK;SKEFDHIVK;THLQDATPLTLGQEFSGYVQQVENGIQR	0	0	2	2	3	0	0	2	2	3	0	0	8.4	8.4	10.2	0	0	2	2	2	+	5.49715	7.19254	0	9.5536	20	53.151	2.68707	-1.65336	18.1026	17.5912	17.5003	15.6964	16.8856	16.8688	19.1491	19.6235	19.3815	19.6568	19.5502	19.5845
Color [DarkGray]	1	4	Q12428	Q12428	Probable 2-methylcitrate dehydratase	PDH1	PRPD_YEAST Probable 2-methylcitrate dehydratase OS=Saccharomyces cerevisiae (strain ATCC 204508 / S288c) OX=559292 GN=PDH1 PE=1 SV=1	AVNLAYLVK;EHFVESPDKVDLIMK;LCFLDTLGCGLAALK;MLGLSQEQTIEALSQAFVDGQSLR;NANVGTIPSVLTAR;SKYDSYVMENVLFK;SSLALDTAR;VGLDHVVLVK	2	2	5	8	6	2	2	5	8	6	3.5	4.5	13.8	21.3	15.7	0	0	6	6	5	+	6.30908	7.83151	0	17.676	49	57.683	2.42164	-1.67589	18.7748	19.5535	19.2578	19.2178	17.2061	17.9401	20.7214	20.7021	21.1902	20.4858	20.8682	20.9023
Color [DarkGray]	1	4	P38011	P38011	Guanine nucleotide-binding protein subunit beta-like protein	ASC1	GBLP_YEAST Guanine nucleotide-binding protein subunit beta-like protein OS=Saccharomyces cerevisiae (strain ATCC 204508 / S288c) OX=559292 GN=ASC1 PE=1 SV=4	AMYTLSAQDEVFSLAFSPNR;VFSLDPQYLVDDLRPEFAGYSK	0	1	2	1	1	0	1	2	1	1	0	6.9	13.2	6.9	6.9	0	1	1	1	1		4.8935	7.08696	0	2.8409	18	34.805	0.89538	-1.68407	16.1349	18.999	18.3364	18.4325	18.7562	18.415	19.6048	19.6875	19.2302	18.7844	19.2603	19.0863
Color [DarkGray]	1	4	P06168	P06168	Ketol-acid reductoisomerase, mitochondrial	ILV5	ILV5_YEAST Ketol-acid reductoisomerase, mitochondrial OS=Saccharomyces cerevisiae (strain ATCC 204508 / S288c) OX=559292 GN=ILV5 PE=1 SV=1	DLTHVEPPKDLDVILVAPK;ENGHSPSEAFNETVEEATQSLYPLIGK;EVNSDLYGER;GALDWYPIFK;GINSSYAVWNDVTGK;NALKPVFQDLYESTK;NDTFALIGYGSQGYGQGLNLR;NLFTVEDAIK;SLEFNSQPDYR;TLYFSHGFSPVFK	1	2	6	9	9	1	2	6	9	9	2.5	6.3	24.6	35.7	35.7	0	0	5	9	8	+	6.49574	8.03703	0	46.577	72	44.368	1.36016	-1.68972	18.2002	19.9077	19.8941	18.4739	19.4381	18.3251	20.8691	21.2703	20.9318	21.2295	20.9922	21.2055
Color [DarkGray]	1	4	Q12118	Q12118	Small glutamine-rich tetratricopeptide repeat-containing protein 2	SGT2	SGT2_YEAST Small glutamine-rich tetratricopeptide repeat-containing protein 2 OS=Saccharomyces cerevisiae (strain ATCC 204508 / S288c) OX=559292 GN=SGT2 PE=1 SV=1	AEDLKMQGNK;EISEDGADSLNVAMDCISEAFGFER;SASKEEIAALIVNYFSSIVEKK;VLDIEGDNATEAMKR;VLPTNAIYYANR	0	0	0	2	5	0	0	0	2	5	0	0	0	7.8	24.3	0	0	0	1	1		5.68758	7.23185	0	5.3305	10	37.218	0.956419	-1.69488	17.1626	16.6079	16.7779	16.4694	15.892	15.6349	19.4401	16.9209	19.2721	20.001	20.6008	20.1664
Color [DarkGray]	1	4	P21954	P21954	Isocitrate dehydrogenase [NADP], mitochondrial	IDP1	IDHP_YEAST Isocitrate dehydrogenase [NADP], mitochondrial OS=Saccharomyces cerevisiae (strain ATCC 204508 / S288c) OX=559292 GN=IDP1 PE=1 SV=1	ATDTLIPGPGSLELVYKPSDPTTAQPQTLK;DATSDKITQDAAEAIKK;FKDIFQEVYEAQYK;LILPYLDVDLK;SAYVTTEEFLDAVEKR;TFESEAAHGTVTR	1	0	3	2	2	0	0	2	1	1	5.6	0	13.3	8.9	9.3	0	0	2	0	0	+	5.27319	7.28326	0	7.6287	10	48.19	1.12136	-1.72656	19.2261	17.564	16.8311	16.5291	19.2371	15.8861	19.4289	19.474	19.898	20.1664	19.3687	19.0385
Color [DarkGray]	1	4	P46672	P46672	tRNA-aminoacylation cofactor ARC1	ARC1	ARC1_YEAST tRNA-aminoacylation cofactor ARC1 OS=Saccharomyces cerevisiae (strain ATCC 204508 / S288c) OX=559292 GN=ARC1 PE=1 SV=2	DNTFIVSTLYPTSTDVHVFEVALPLIK;EQSAQAAQWESVLK;SDLVTKFESLIISK;VASIANAQVR	0	2	1	4	3	0	2	1	4	3	0	6.4	3.7	17.3	10.1	0	0	1	1	2	+	5.82825	7.27196	0	11.684	22	42.083	2.80562	-1.75692	17.1908	17.6454	17.7031	18.6347	19.0825	18.3579	19.331	19.5161	18.963	19.2883	19.7636	19.3074
Color [DarkGray]	1	4	P06169;P26263;P16467;Q07471	P06169	Pyruvate decarboxylase isozyme 1	PDC1	PDC1_YEAST Pyruvate decarboxylase isozyme 1 OS=Saccharomyces cerevisiae (strain ATCC 204508 / S288c) OX=559292 GN=PDC1 PE=1 SV=7	AQYNEIQGWDHLSLLPTFGAK;DAKNPVILADACCSR;EVIDTILALVK;GSIDEQHPR;GYKPVAVPAR;KLIDLTQFPAFVTPMGK;LIDLTQFPAFVTPMGK;LKQVNVNTVFGLPGDFNLSLLDK;LLQTPIDMSLKPNDAESEKEVIDTILALVK;LTAATNAK;MSANISETTAMITDIATAPAEIDR;NATFPGVQMK;NIVEFHSDHMK;NPVILADACCSR;QLLLHHTLGNGDFTVFHR;QVNVNTVFGLPGDFNLSLLDK;SEITLGK;TPANAAVPASTPLK;TTYVTQRPVYLGLPANLVDLNVPAK;VATTGEWDKLTQDK;VILFIGDGSLQLTVQEISTMIR;WAGNANELNAAYAADGYAR;WGLKPYLFVLNNDGYTIEK;…	12	12	20	22	19	12	12	20	22	19	32.9	33.6	49.9	53.5	49.9	6	6	22	29	25	+	7.37328	9.1839	0	317.37	272	61.495	4.88719	-1.75922	22.3016	22.2593	22.4573	21.7771	21.8717	21.8819	24.1124	24.0398	24.1438	24.1643	24.0994	24.1645
Color [DarkGray]	1	4	P25293	P25293	Nucleosome assembly protein	NAP1	NAP1_YEAST Nucleosome assembly protein OS=Saccharomyces cerevisiae (strain ATCC 204508 / S288c) OX=559292 GN=NAP1 PE=1 SV=2	EFQVEMFELENK;IISGQEQPKPEQIAK;IQNEDQDEELEEDLEER;ITPIESFFNFFDPPK;LGSLVGQDSGYVGGLPK	1	0	3	1	3	1	0	3	1	3	3.6	0	10.1	2.9	10.1	0	0	2	1	1		5.86403	7.22287	0	5.189	11	47.884	0.478087	-1.77087	19.6652	16.0298	16.3993	17.4685	19.5255	16.5527	20.4827	20.0091	16.9151	20.2551	19.742	16.8309
Color [DarkGray]	1	4	P47176;P38891	P47176;P38891	Branched-chain-amino-acid aminotransferase, cytosolic;Branched-chain-amino-acid aminotransferase, mitochondrial	BAT2;BAT1	BCA2_YEAST Branched-chain-amino-acid aminotransferase, cytosolic OS=Saccharomyces cerevisiae (strain ATCC 204508 / S288c) OX=559292 GN=BAT2 PE=1 SV=1;BCA1_YEAST Branched-chain-amino-acid aminotransferase, mitochondrial OS=Saccharomyces cerevisiae (strain A	ELVTAPLDGTILEGVTR;ICLPTFDPEELITLIGK;LEATDYATR	1	1	2	2	3	1	1	2	2	3	4.5	4.5	9	9	11.4	0	0	2	1	3	+	6.29638	7.6388	0	3.9528	19	41.624	3.77579	-1.85198	19.0468	18.7492	18.8034	18.2864	18.0659	18.9312	20.5614	20.9053	20.6887	21.0378	21.0486	20.8427
Color [DarkGray]	1	4	P00817	P00817	Inorganic pyrophosphatase	IPP1	IPYR_YEAST Inorganic pyrophosphatase OS=Saccharomyces cerevisiae (strain ATCC 204508 / S288c) OX=559292 GN=IPP1 PE=1 SV=4	AVGDNDPIDVLEIGETIAYTGQVK;GIDLTNVTLPDTPTYSK;LEITKEETLNPIIQDTKK;LNDIEDVEKYFPGLLR;VIAIDINDPLAPK	2	0	3	5	5	2	0	3	5	5	13.9	0	19.9	30.7	30.7	1	0	1	3	5	+	6.35647	7.78226	0	14.669	28	32.299	3.54254	-1.8576	19.314	19.0808	19.5413	17.3776	17.2432	17.2289	21.3257	21.136	21.0473	21.4226	21.1754	21.1736
Color [DarkGray]	1	4	P06778	P06778	DNA repair and recombination protein RAD52	RAD52	RAD52_YEAST DNA repair and recombination protein RAD52 OS=Saccharomyces cerevisiae (strain ATCC 204508 / S288c) OX=559292 GN=RAD52 PE=1 SV=2	FDPPDFDENNLFRPTDEISESSR;IAYIEGWR;KLGPEYISK;KPVFGNHSEDIQTK;NNDKELGPHMLEGAGNQVPR;QSPTASSNPEAEQITFVTAK;SAVTDALKR;SVVIDFLDER;SVVIDFLDERQGK;TNTLHENQEQQQYPNK;TNTLHENQEQQQYPNKR;VINLANQIFGYNGWSTEVK;VKFDPPDFDENNLFRPTDEISESSR;VTLTSGTYR;VTLTSGTYREDIGYGTVENER;VTNTNPDSTK;VTNTNPDSTKNLVK;YIGEESIFDPK	0	18	0	0	1	0	18	0	0	1	0	42.5	0	0	1.9	0	16	0	0	0	+	6.98073	8.76599	0	207.64	48	52.403	1.58709	-1.8757	16.2278	16.2593	15.6294	22.0957	22.0006	26.6096	16.914	18.336	18.4935	18.4337	18.1656	18.4178
Color [DarkGray]	1	4	P00331	P00331	Alcohol dehydrogenase 2	ADH2	ADH2_YEAST Alcohol dehydrogenase 2 OS=Saccharomyces cerevisiae (strain ATCC 204508 / S288c) OX=559292 GN=ADH2 PE=1 SV=3	AIIFYESNGK;AIIFYESNGKLEHK;ANGTVVLVGLPAGAK;ATNGGAHGIINVSVSEAAIEASTR;CSSDVFNHVVK;DIPVPKPKPNELLINVK;EALDFFAR;EKDIVSAVVK;IGDYAGIK;LPLVGGHEGAGVVVGMGENVK;PKPNELLINVK;SISIVGSYVGNR;VLGIDGGPGK;VVGLSSLPEIYEK;VVGLSSLPEIYEKMEK	6	3	6	10	11	6	3	6	10	11	34.8	23.9	36.8	44.8	45.4	2	1	6	10	12	+	7.32236	8.78065	0	33.137	95	36.731	4.93018	-1.87806	22.3937	22.1588	22.3304	21.2147	22.111	21.6866	24.18	24.1612	24.176	23.8197	24.0142	24.0304
Color [DarkGray]	1	4	P10963	P10963	Phosphoenolpyruvate carboxykinase [ATP]	PCK1	PCKA_YEAST Phosphoenolpyruvate carboxykinase (ATP) OS=Saccharomyces cerevisiae (strain ATCC 204508 / S288c) OX=559292 GN=PCK1 PE=1 SV=2	AILDSIHDGSLANETYETLPIFNLQVPTK;AMEMIILGTEYAGEMK;AMEMIILGTEYAGEMKK;ANAYLINTGWTGSSYVSGGK;ANAYLINTGWTGSSYVSGGKR;ATPDVLAAGPQFE;CINLSAEKEPEIFDAIK;DHIYIVDAFAGWDPK;FGSVLENVIYDEK;GAVTNLANLFVQNFK;IPCLADSHPK;IRQELALSDEVTTIR;IRQELALSDEVTTIRR;IVEEPTSKDEIWWGPVNKPCSER;LLIGDDEHCWSDHGVFNIEGGCYAK;LTPEQVMYHFISGYTSK;MAGTEQGVTEPEPTFSSCFGQPFLALHPIR;NAPAAVLYEDGLKENK;NIILLTCDASGVLPPVSK;NWSQGESK;QELALSDEVTTIR;RNAPAAVLYED…	16	18	25	24	27	16	18	25	24	27	46.4	51.9	64.3	64.1	65.6	12	12	36	37	45	+	7.70862	9.53575	0	323.31	460	60.983	5.42022	-1.90461	22.9948	23.0873	23.1328	22.4869	22.6571	22.4823	24.906	25.017	25.0059	25.033	25.0481	25.0014
Color [DarkGray]	1	4	P16521;P53978	P16521	Elongation factor 3A	YEF3	EF3A_YEAST Elongation factor 3A OS=Saccharomyces cerevisiae (strain ATCC 204508 / S288c) OX=559292 GN=YEF3 PE=1 SV=4	DKEIQSVASETLISIVNAVNPVAIK;GELVESHSK;LVEDPQVIAPFLGK;SNFATIADPEAR;STLINVLTGELLPTSGEVYTHENCR	0	0	2	5	3	0	0	2	5	3	0	0	4.8	8.1	6.1	0	0	2	3	5		5.62991	7.49443	0	14.766	31	115.94	0.730885	-1.90589	16.1079	19.646	19.7274	17.33	19.2101	15.6107	20.4382	20.4729	20.2879	20.2738	20.6939	20.27
Color [DarkGray]	1	4	P38720	P38720	6-phosphogluconate dehydrogenase, decarboxylating 1	GND1	6PGD1_YEAST 6-phosphogluconate dehydrogenase, decarboxylating 1 OS=Saccharomyces cerevisiae (strain ATCC 204508 / S288c) OX=559292 GN=GND1 PE=1 SV=1	AYREEPDLENLLFNK;DREQFVDDLEQALYASK;GILFVGSGVSGGEEGAR;SIIGATSIEDFISK	0	0	2	2	3	0	0	2	2	3	0	0	6.3	6.3	9.4	0	0	0	2	3	+	5.75679	7.25005	0	12.667	18	53.543	0.956112	-1.94175	15.8028	18.9188	18.2481	17.3691	16.7806	16.763	19.515	19.7679	19.5121	19.7848	19.8257	19.8896
Color [DarkGray]	1	4	Q01532	Q01532	Cysteine proteinase 1, mitochondrial	LAP3	BLH1_YEAST Cysteine proteinase 1, mitochondrial OS=Saccharomyces cerevisiae (strain ATCC 204508 / S288c) OX=559292 GN=LAP3 PE=1 SV=3	ANYFLDQIVSSADQDIDSR;LDPSTPVSLINDPR;SADDSIIVTLR;VFNTVVSTDSTPVTNQK	0	0	2	2	4	0	0	2	2	4	0	0	6.8	6.8	12.6	0	0	1	1	3	+	5.55666	6.97163	0	7.8103	11	55.482	2.56729	-1.97555	17.1797	16.677	17.663	16.424	16.5212	15.3748	19.3268	19.0323	19.0872	19.0799	19.272	19.2871
Color [DarkGray]	1	4	P28240	P28240	Isocitrate lyase	ICL1	ACEA_YEAST Isocitrate lyase OS=Saccharomyces cerevisiae (strain ATCC 204508 / S288c) OX=559292 GN=ICL1 PE=1 SV=1	AFAPYADLVWMESNYPDFQQAK;AKSQEELDEMGAPIDYLTPIVADADAGHGGLTAVFK;AMSVDEQHTFIQR;AQLFHDRK;AYAQNVQQR;CVIPVQEHVNR;EILGHEIFFDWELPR;EKFPDQWLAYNLSPSFNWPK;EMDDGVDVLK;FPDQWLAYNLSPSFNWPK;GAAGIHMEDQTSTNK;GAAGIHMEDQTSTNKK;LAQGGVSATAAMGTGVTEDQFK;LDADAAEIEK;LDADAAEIEKWWSDSR;LFHEAVIDEIER;MCADIMHSDLIVVAR;NDFAALQAK;SALSNKQELIK;SALSNKQELIKK;SQEELDEMGAPIDYLTPIVADADAGHGGLTAVFK;TDSEAATLISSTIDTR;TFGALDPVQISQMAK;VGPLTETSHR;…	8	6	18	17	22	8	6	18	17	22	14.9	14.7	42.4	43.1	50.8	2	0	19	21	27	+	7.41581	9.05869	0	323.31	213	62.408	3.31011	-2.00323	21.4539	22.0359	21.9615	20.6467	20.5428	20.6285	23.8315	23.7066	23.9229	23.7704	23.7814	23.8704
Color [DarkGray]	1	4	P00724	P00724	Invertase 2	SUC2	INV2_YEAST Invertase 2 OS=Saccharomyces cerevisiae (strain ATCC 204508 / S288c) OX=559292 GN=SUC2 PE=1 SV=1	GLEDPEEYLR;SENDLSYYK	0	0	1	1	1	0	0	1	1	1	0	0	1.9	1.9	1.9	0	0	0	0	0	+	5.66017	6.93892	0.0035778	2.1403	4	60.639	2.26923	-2.05894	17.0899	17.1105	17.8662	16.8352	16.6978	16.6796	19.24	19.0499	19.9536	19.359	19.8422	20.0083
Color [DarkGray]	1	4	P39676	P39676	Flavohemoprotein	YHB1	FHP_YEAST Flavohemoprotein OS=Saccharomyces cerevisiae (strain ATCC 204508 / S288c) OX=559292 GN=YHB1 PE=1 SV=2	ATVPVLEQQGTVITR;ELIHQNEVPLVLLSSGVGVTPLLAMLEEQVK;ENFPAGLVSEYLHK;NMLTEHTELLNIFNR;VGAQPNALATTVLAAAK	1	0	4	4	2	1	0	4	4	2	3.8	0	19.5	19.5	8	1	0	4	1	1	+	6.20648	7.55524	0	24.951	23	44.646	0.996287	-2.08493	17.1566	17.6546	20.211	15.7172	16.7866	16.1242	20.0996	20.942	20.2354	20.7034	20.7918	20.264
Color [DarkGray]	1	4	P33330	P33330	Phosphoserine aminotransferase	SER1	SERC_YEAST Phosphoserine aminotransferase OS=Saccharomyces cerevisiae (strain ATCC 204508 / S288c) OX=559292 GN=SER1 PE=1 SV=1	DLINFNDIGLGIGEISHR;NISGASDETLHELGVPITPIAFDYPTVVK	0	0	0	0	2	0	0	0	0	2	0	0	0	0	11.9	0	0	0	0	1	+	5.59049	6.82094	0	10.067	7	43.415	0.847217	-2.08976	16.1645	17.417	15.5592	16.3271	16.2787	16.426	16.4579	19.4285	19.5236	19.7526	19.2921	19.4123
Color [DarkGray]	1	4	P14540	P14540	Fructose-bisphosphate aldolase	FBA1	ALF_YEAST Fructose-bisphosphate aldolase OS=Saccharomyces cerevisiae (strain ATCC 204508 / S288c) OX=559292 GN=FBA1 PE=1 SV=3	DSKSPIILQTSNGGAAYFAGK;DYIMSPVGNPEGPEKPNKK;EHGEPLFSSHMLDLSEETDEENISTCVK;EHKFAIPAINVTSSSTAVAALEAAR;FAIPAINVTSSSTAVAALEAAR;GAIAAAHYIR;GISNEGQNASIK;GVEQILKR;KLLPWFDGMLEADEAYFK;LLPWFDGMLEADEAYFK;SIAPAYGIPVVLHSDHCAK;SIAPAYGIPVVLHSDHCAKK;SPIILQTSNGGAAYFAGK;TGVIVGEDVHNLFTYAK;VNLDTDCQYAYLTGIR	6	4	12	12	15	6	4	12	12	15	25.6	16.2	45.1	52.9	53.8	4	4	16	16	22	+	7.72153	9.10411	0	148.67	192	39.62	4.17519	-2.13936	22.5459	22.6449	22.9547	21.2444	21.6758	21.8819	24.8436	24.8876	24.8323	24.7771	24.8554	24.7765
Color [DarkGray]	1	4	P06738	P06738	Glycogen phosphorylase	GPH1	PHSG_YEAST Glycogen phosphorylase OS=Saccharomyces cerevisiae (strain ATCC 204508 / S288c) OX=559292 GN=GPH1 PE=1 SV=4	AEIIIPASDLSEHISTAGTEASGTSNMK;AESITAVLYPNDNFAQGK;ALDNALINMK;GALDDLGFKLEDVLDQEPDAGLGNGGLGR;ISIIEENSPER;LISETLNDPTEEYLLDMAK;NEVQIPVTFYGYVDRPEGGK;SVLSVANVGFFSSDR;TTLSASQWIGGER;VLAVAYDFPVPGFK	1	0	1	4	8	1	0	1	4	8	1.2	0	1.6	7.3	17	0	0	1	1	5	+	5.95746	7.79048	0	26.502	34	103.27	2.49711	-2.17643	18.0521	18.1252	18.5403	17.2441	17.7198	16.0356	20.243	19.9894	21.0145	20.0861	21.1761	21.0842
Color [DarkGray]	1	4	P36060	P36060	NADH-cytochrome b5 reductase 2;NADH-cytochrome b5 reductase p34 form;NADH-cytochrome b5 reductase p32 form	MCR1	MCR1_YEAST NADH-cytochrome b5 reductase 2 OS=Saccharomyces cerevisiae (strain ATCC 204508 / S288c) OX=559292 GN=MCR1 PE=1 SV=1	DFIQEHVPGPK;DQGELIGILNNLGYSK;ELDALKEK;ESTHLFVCGPPPFMNAYSGEK;GHFQLVVK;GSNVVRPYTPVSDLSQK;IEEESHDTR;LPTEDSEMGLVLASALFAK;MTSHLFGLKPNDTVSFK;SITLLGAGTGINPLYQLAHHIVENPNDK;VNLLYGNK;WQPNQFK;YPDKFNVTYFVDDKQDDQDFDGEISFISK	3	0	8	10	10	3	0	8	10	10	17.9	0	38.4	48	51	0	0	7	5	10	+	6.63295	8.17374	0	20.363	58	34.137	1.29854	-2.17911	18.86	21.0667	18.6291	16.7517	15.6651	20.3294	21.8799	21.4658	21.7476	22.1436	22.1187	22.0683
Color [DarkGray]	1	4	P53860	P53860	Phosphatidylinositol transfer protein PDR16	PDR16	PDR16_YEAST Phosphatidylinositol transfer protein PDR16 OS=Saccharomyces cerevisiae (strain ATCC 204508 / S288c) OX=559292 GN=PDR16 PE=1 SV=1	FQSFGGIVGLSEVDLR;LIHPFIDPLTR	0	1	1	1	1	0	1	1	1	1	0	4.6	3.1	4.6	4.6	0	0	0	0	1	+	5.61469	7.1003	0.0034423	1.9519	4	40.713	2.09272	-2.18239	17.2202	17.5647	16.0941	18.5896	18.6315	19.2321	19.0611	19.1769	19.1881	19.6622	19.1017	19.3149
Color [DarkGray]	1	4	P00447	P00447	Superoxide dismutase [Mn], mitochondrial	SOD2	SODM_YEAST Superoxide dismutase [Mn], mitochondrial OS=Saccharomyces cerevisiae (strain ATCC 204508 / S288c) OX=559292 GN=SOD2 PE=1 SV=1	LAGVQGSGWAFIVK;WDFGALEPYISGQINELHYTK	0	0	2	2	2	0	0	2	2	2	0	0	15	15	15	0	0	2	3	2	+	5.68034	7.07151	0	6.6264	16	25.774	3.80257	-2.18345	17.4946	17.4856	17.5006	17.2444	16.6795	17.094	19.5934	19.982	19.4557	19.7533	20.0699	20.1425
Color [DarkGray]	1	4	P17255	P17255	V-type proton ATPase catalytic subunit A;Endonuclease PI-SceI	VMA1	VATA_YEAST V-type proton ATPase catalytic subunit A OS=Saccharomyces cerevisiae (strain ATCC 204508 / S288c) OX=559292 GN=VMA1 PE=1 SV=3	AIKEESQSIYIPR;EASIYTGITLAEYFR;FQVGDHISGGDIYGSVFENSLISSHK;FYDSNYPEFPVLR;GTITWIAPAGEYTLDEK;IDGDKATIQVYEETAGLTVGDPVLR;MKEILSNAEELEQVVQLVGK;TTLVANTSNMPVAAR	1	0	5	6	7	1	0	5	6	7	1.2	0	8.8	10.6	11.9	0	0	5	6	8	+	5.31603	7.63029	0	24.906	51	118.64	1.18803	-2.21013	18.643	17.3661	16.0192	16.5375	19.1775	17.1807	19.9365	20.0413	18.6809	20.7326	20.7238	20.8118
Color [DarkGray]	1	4	P00924	P00924	Enolase 1	ENO1	ENO1_YEAST Enolase 1 OS=Saccharomyces cerevisiae (strain ATCC 204508 / S288c) OX=559292 GN=ENO1 PE=1 SV=3	DGKYDLDFK;DGKYDLDFKNPNSDK;GNPTVEVELTTEK;GNPTVEVELTTEKGVFR;HLADLSK;IATAIEKK;IEEELGDNAVFAGENFHHGDKL;IGLDCASSEFFK;IGLDCASSEFFKDGKYDLDFK;IGSEVYHNLK;KAADALLLK;LGANAILGVSLAASR;NVNDVIAPAFVK;RYGASAGNVGDEGGVAPNIQTAEEALDLIVDAIK;RYPIVSIEDPFAEDDWEAWSHFFK;SGETEDTFIADLVVGLR;SIVPSGASTGVHEALEMR;SIVPSGASTGVHEALEMRDGDKSK;TAGIQIVADDLTVTNPK;TAGIQIVADDLTVTNPKR;TSPYVLPVPFLNVLNGGSHAGGALALQEFMIAPTGAK;VNQIGTLSESIK;YDLDFK…	5	5	8	9	9	5	5	8	9	9	39.4	35	60.2	64.1	64.1	8	5	13	14	12	+	7.93304	9.3973	0	289.15	148	46.816	5.69223	-2.22756	24.4482	24.4468	24.4728	23.7493	23.8221	23.6899	26.6389	26.6223	26.7893	26.7127	26.5802	26.6402
Color [DarkGray]	1	4	P23301	P23301	Eukaryotic translation initiation factor 5A-1	HYP2	IF5A1_YEAST Eukaryotic translation initiation factor 5A-1 OS=Saccharomyces cerevisiae (strain ATCC 204508 / S288c) OX=559292 GN=HYP2 PE=1 SV=3	KLEDLSPSTHNMEVPVVK;SDEEHTFETADAGSSATYPMQCSALRK;VHLVAIDIFTGK	0	0	2	2	2	0	0	2	2	2	0	0	19.1	19.1	19.1	0	0	2	2	3	+	6.50861	7.72478	0	17.343	21	17.114	1.5365	-2.26458	18.3405	20.3005	18.2207	16.2119	18.8101	18.8666	21.3841	21.0883	21.183	21.5355	21.9005	21.4912
Color [DarkGray]	1	4	P31116	P31116	Homoserine dehydrogenase	HOM6	DHOM_YEAST Homoserine dehydrogenase OS=Saccharomyces cerevisiae (strain ATCC 204508 / S288c) OX=559292 GN=HOM6 PE=1 SV=1	LSDYDKDLTQLKK;TLPLDDLIAHLK;YTNPVVIQGAGAGAAVTAAGVLGDVIK	0	0	1	2	3	0	0	1	2	3	0	0	7.5	10.9	14.5	0	0	0	0	3	+	5.22904	7.10863	0	5.3038	8	38.502	2.40225	-2.28599	16.9885	18.1971	17.819	16.9892	17.3346	17.0182	19.9746	19.7038	20.1841	20.491	19.8943	19.8014
Color [DarkGray]	1	4	P38009;P54113	P38009	Bifunctional purine biosynthesis protein ADE17;Phosphoribosylaminoimidazolecarboxamide formyltransferase;IMP cyclohydrolase	ADE17	PUR92_YEAST Bifunctional purine biosynthesis protein ADE17 OS=Saccharomyces cerevisiae (strain ATCC 204508 / S288c) OX=559292 GN=ADE17 PE=1 SV=2	AFEHTADYDAAISDFFRK;DAGFPIEDVSAITHAPEMLGGR;ELSASLNLPAAASFK;LTNVSLSSDAFFPFPDNVYR;MSSFGDWIALSNIVDVPTAK;QVYFVADIENLSPLACAYAR;TAILSVYDKTGLLDLAR;VGVTIPEAVEEIDIGGVTLLR;VTILSDPKDYSEFLSELSSNGEISQDLR	0	0	4	4	6	0	0	4	4	6	0	0	15.4	14.9	21.3	0	0	2	5	6	+	5.63432	7.4923	0	17.218	40	65.262	3.03765	-2.29767	17.3064	17.0252	17.7501	16.3196	16.6139	16.5951	19.9282	19.6495	19.3971	19.817	20.0748	19.4832
Color [DarkGray]	1	4	P00729	P00729	Carboxypeptidase Y	PRC1	CBPY_YEAST Carboxypeptidase Y OS=Saccharomyces cerevisiae (strain ATCC 204508 / S288c) OX=559292 GN=PRC1 PE=1 SV=1	AWTDVLPWKYDEEFASQK;KDCEGGNLCYPTLQDIDDYLNQDYVK	0	0	0	1	1	0	0	0	1	1	0	0	0	3.4	3.4	0	0	0	1	1	+	5.43326	6.71202	0	3.3786	6	59.801	5.2501	-2.35687	17.1072	17.2984	17.102	17.0402	16.904	16.8873	19.5895	19.5194	19.4693	19.1787	19.4327	19.0075
Color [DarkGray]	1	4	P00925	P00925	Enolase 2	ENO2	ENO2_YEAST Enolase 2 OS=Saccharomyces cerevisiae (strain ATCC 204508 / S288c) OX=559292 GN=ENO2 PE=1 SV=2	AAQDSFAANWGVMVSHR;ANLDVKDQK;AVDDFLLSLDGTANK;AVYAGENFHHGDKL;DGKYDLDFK;DGKYDLDFKNPESDK;GNPTVEVELTTEK;GNPTVEVELTTEKGVFR;GVMNAVNNVNNVIAAAFVK;IATAIEKK;IEEELGDK;IEEELGDKAVYAGENFHHGDKL;IGLDCASSEFFK;IGLDCASSEFFKDGKYDLDFK;IGSEVYHNLK;KAADALLLK;LGANAILGVSMAAAR;NVPLYQHLADLSK;RYGASAGNVGDEGGVAPNIQTAEEALDLIVDAIK;RYPIVSIEDPFAEDDWEAWSHFFK;SGETEDTFIADLVVGLR;SIVPSGASTGVHEALEMR;SIVPSGASTGVHEALEMRDEDKSK;TAGIQIVADDLTV…	12	9	24	27	28	4	3	12	13	13	39.4	31.1	75.7	81	81	8	6	32	37	46	+	8.16658	9.60549	0	323.31	378	46.914	5.24241	-2.38903	23.1387	22.931	23.1486	22.0233	22.1199	22.2191	25.4826	25.4882	25.4146	25.4781	25.4663	25.4445
Color [DarkGray]	1	4	P06208;Q12166	P06208;Q12166	2-isopropylmalate synthase;2-isopropylmalate synthase 2, mitochondrial	LEU4;LEU9	LEU1_YEAST 2-isopropylmalate synthase OS=Saccharomyces cerevisiae (strain ATCC 204508 / S288c) OX=559292 GN=LEU4 PE=1 SV=1;LEU9_YEAST 2-isopropylmalate synthase 2, mitochondrial OS=Saccharomyces cerevisiae (strain ATCC 204508 / S288c) OX=559292 GN=LEU9 PE=	AIFATINNIIHSGDVSIPSLAEVEGK;IPYLPLDPK;TVEALTGAK	0	0	0	1	3	0	0	0	1	3	0	0	0	1.5	7.1	0	0	0	1	3	+	5.0057	6.58403	0.0034188	1.9085	7	68.408	1.50072	-2.41211	15.595	15.6467	16.7332	17.7872	16.0583	17.5212	19.0957	17.116	18.9995	18.2599	19.1626	18.9831
Color [DarkGray]	1	4	P12709	P12709	Glucose-6-phosphate isomerase	PGI1	G6PI_YEAST Glucose-6-phosphate isomerase OS=Saccharomyces cerevisiae (strain ATCC 204508 / S288c) OX=559292 GN=PGI1 PE=1 SV=3	ANKPMYVDGVNVAPEVDSVLK;AVYHVALR;DAMFKGEHINSTEDR;EFSEQVR;FPAYLQQLSMESNGK;GNVFTDYSTGSILFGEPATNAQHSFFQLVHQGTK;HFAALSTNETEVAK;LATELPAWSK;LIPSDFILAAQSHNPIENK;NLVNDEIIAALIELAK;NMFGFESWVGGR;TFTNYDGSK;TFTTAETITNANTAK;VFSGNRPTTSILAQK;VVDPETTLFLIASK	5	4	10	12	12	5	4	10	12	12	12.5	9.4	28.7	32.7	32.7	1	1	10	12	12	+	6.9251	8.4936	0	143.17	113	61.298	3.64118	-2.41467	19.2025	19.7501	19.7829	18.1352	19.4938	17.6448	22.0354	21.9212	22.0229	22.02	22.0918	21.9932
Color [DarkGray]	1	4	P22203	P22203	V-type proton ATPase subunit E	VMA4	VATE_YEAST V-type proton ATPase subunit E OS=Saccharomyces cerevisiae (strain ATCC 204508 / S288c) OX=559292 GN=VMA4 PE=1 SV=4	ADQEYEIEK;DEYKPILQSLIVEALLK;EQSLDGIFEETKEK;LSGIANNRDEYKPILQSLIVEALLK;NETNNIDGNFK;SSAITALTPNQVNDELNK	0	0	2	1	5	0	0	2	1	5	0	0	16.7	6	25.3	0	0	1	0	5	+	5.94821	7.42932	0	16.881	13	26.471	0.810108	-2.42428	15.9907	17.016	17.5804	18.0207	15.9098	16.3697	20.2376	20.9144	16.7081	21.4448	21.4755	20.4337
Color [DarkGray]	1	4	P16861	P16861	ATP-dependent 6-phosphofructokinase subunit alpha	PFK1	PFKA1_YEAST ATP-dependent 6-phosphofructokinase subunit alpha OS=Saccharomyces cerevisiae (strain ATCC 204508 / S288c) OX=559292 GN=PFK1 PE=1 SV=1	AVLEFTPETPSPLIGILENK;DTEFIELYENFLSTTVKDDGSELLPVSDR;HGENSLLSSGTSQDSLR;NEQASSVYSTQLLADIISEASK;NKLDGLIILGGFEGFR;SIITNDEALFKK;WLATLQGVDAVK	0	0	3	4	6	0	0	3	4	6	0	0	6.8	8.8	11.2	0	0	1	0	3	+	5.53864	7.51123	0	8.2222	14	107.97	1.38089	-2.44416	17.056	16.0298	18.8158	17.6767	15.6364	16.6249	19.5595	19.6476	20.027	19.9428	19.8922	20.4732
Color [DarkGray]	1	4	P38013	P38013	Peroxiredoxin type-2	AHP1	AHP1_YEAST Peroxiredoxin AHP1 OS=Saccharomyces cerevisiae (strain ATCC 204508 / S288c) OX=559292 GN=AHP1 PE=1 SV=4	ETNPGTDVTVSSVESVLAHL	0	0	1	1	1	0	0	1	1	1	0	0	11.4	11.4	11.4	0	0	1	2	1	+	6.00467	6.95892	0.0097087	1.5475	11	19.114	2.27874	-2.45708	17.6691	16.1959	17.1923	16.8874	16.7534	16.7356	19.6464	19.4795	19.3026	19.7877	19.937	19.4963
Color [DarkGray]	1	4	Q06523	Q06523	Uncharacterized protein YPR148C	YPR148C	YP148_YEAST Uncharacterized protein YPR148C OS=Saccharomyces cerevisiae (strain ATCC 204508 / S288c) OX=559292 GN=YPR148C PE=1 SV=1	FVQESLGTVSDISK;TAQTTEAQGADHNEEDEEDEEDEEDDEDLSNLIK	0	1	1	1	1	0	1	1	1	1	0	7.8	7.8	7.8	7.8	0	1	2	0	2	+	5.03523	7.49845	0	16.165	22	49.279	0.748941	-2.45877	15.5658	20.3179	19.808	20.5469	20.1971	19.749	20.9141	21.014	21.1399	21.2421	21.1092	21.1482
Color [DarkGray]	1	4	P08468	P08468	Protein PET111, mitochondrial	PET111	PT111_YEAST Protein PET111, mitochondrial OS=Saccharomyces cerevisiae (strain ATCC 204508 / S288c) OX=559292 GN=PET111 PE=1 SV=2	DYDIGQIYTTYEQFTPLLASHTDK;KINGGEDSSLSGFNAVDFER;YFVNTNQFEGLFK	2	1	1	1	1	2	1	1	1	1	4.6	2.5	2.5	2.5	2.5	1	0	0	0	0	+	4.81206	7.36434	0	3.7086	4	94.522	3.16869	-2.48497	17.284	18.0742	17.546	20.6585	20.5726	20.5028	19.9085	20.3186	20.1319	20.19	19.4739	16.0633
Color [DarkGray]	1	4	Q12199	Q12199	Type 2A phosphatase activator TIP41	TIP41	TIP41_YEAST Type 2A phosphatase activator TIP41 OS=Saccharomyces cerevisiae (strain ATCC 204508 / S288c) OX=559292 GN=TIP41 PE=1 SV=1	ATLPLEDNPSISINDWTISSR;YKGTESSPESK	0	1	0	0	1	0	1	0	0	1	0	3.1	0	0	3.1	0	0	0	0	0	+	5.49114	6.81335	0.0095847	1.4991	2	41.019	0.944691	-2.51396	16.7178	16.6617	16.0764	19.435	19.1397	16.5286	16.6473	20.7872	19.5633	19.3341	19.2462	19.1756
Color [DarkGray]	1	4	P07170	P07170	Adenylate kinase	ADK1	KAD2_YEAST Adenylate kinase OS=Saccharomyces cerevisiae (strain ATCC 204508 / S288c) OX=559292 GN=ADK1 PE=1 SV=2	FHAAHLATGDMLR;GTQAPNLQER	0	0	0	2	2	0	0	0	2	2	0	0	0	10.4	10.4	0	0	0	2	1	+	5.75381	7.3006	0	3.3588	8	24.254	3.23447	-2.59914	17.8939	17.8722	18.5672	17.3596	17.109	17.6436	20.9689	20.5664	20.5953	20.8705	20.5101	20.6948
Color [DarkGray]	1	4	P32471	P32471	Elongation factor 1-beta	EFB1	EF1B_YEAST Elongation factor 1-beta OS=Saccharomyces cerevisiae (strain ATCC 204508 / S288c) OX=559292 GN=EFB1 PE=1 SV=4	AFQSAYPEFSR;AIEMEGLTWGAHQFIPIGFGIK;ASTDFSKIETLK;SIVTLDVKPWDDETNLEEMVANVK;SYIEGTAVSQADVTVFK	0	0	0	3	5	0	0	0	3	5	0	0	0	28.2	41.7	0	0	0	2	4	+	6.37199	7.53967	0	10.337	15	22.627	2.4491	-2.62892	17.4237	18.7077	18.6202	16.8291	17.3784	16.7593	21.0348	20.9291	20.6744	21.3116	21.1198	20.9375
Color [DarkGray]	1	4	P07991	P07991	Ornithine aminotransferase	CAR2	OAT_YEAST Ornithine aminotransferase OS=Saccharomyces cerevisiae (strain ATCC 204508 / S288c) OX=559292 GN=CAR2 PE=1 SV=2	AEAKPDIVLLGK;AFHNDVYAQFAK;AIILGAEGNFHGR;ALTEQAQTLTLSSR;FVTEFFGFETVLPMNTGAEAVETALK;LAPPLVISEEDLQTGVETIAK;NVAAIILEPIQGEAGIVVPPADYFPK;VAIAALEVIRDEK;YGHAEDFVPILESPEGK	2	2	4	7	8	2	2	4	7	8	8.3	7.8	15.1	27.4	30.2	1	0	5	5	6	+	6.18971	7.87881	0	41.08	51	46.085	2.2424	-2.64599	17.7849	18.2914	19.2566	18.4008	18.1461	17.6159	20.6317	21.3946	21.2446	21.2503	21.8283	21.7834
Color [DarkGray]	1	4	P27616	P27616	Phosphoribosylaminoimidazole-succinocarboxamide synthase	ADE1	PUR7_YEAST Phosphoribosylaminoimidazole-succinocarboxamide synthase OS=Saccharomyces cerevisiae (strain ATCC 204508 / S288c) OX=559292 GN=ADE1 PE=1 SV=2	AEQGEHDENISPAQAAELVGEDLSR;NHLVDIAPGK;TELDGILPLVAR;TNEIILVDEVLTPDSSR;YIEAYETLTGSK	0	0	0	4	3	0	0	0	4	3	0	0	0	16.7	12.7	0	0	0	3	4	+	5.72384	7.12688	0	13.382	19	34.603	2.19654	-2.66394	16.5171	17.2923	18.2246	15.3303	16.5925	17.3209	20.2192	19.7912	20.0155	19.7283	19.737	19.9002
Color [DarkGray]	1	4	P53598	P53598	Succinyl-CoA ligase [ADP-forming] subunit alpha, mitochondrial	LSC1	SUCA_YEAST Succinate--CoA ligase [ADP-forming] subunit alpha, mitochondrial OS=Saccharomyces cerevisiae (strain ATCC 204508 / S288c) OX=559292 GN=LSC1 PE=1 SV=1	DVGVAVVESPGYLGQALLDQFAK;LVGPNCPGIINPATK;SGTLTYEAVQQTTK	0	0	2	2	2	0	0	2	2	2	0	0	11.2	11.2	11.6	0	0	1	1	2	+	5.93862	7.08475	0	10.954	11	35.032	1.22469	-2.71381	16.5333	19.223	15.8803	17.8186	15.5295	19.8138	19.5399	20.1239	20.1141	19.9289	20.001	19.295
Color [DarkGray]	1	4	P36008	P36008	Elongation factor 1-gamma 2	TEF4	EF1G2_YEAST Elongation factor 1-gamma 2 OS=Saccharomyces cerevisiae (strain ATCC 204508 / S288c) OX=559292 GN=TEF4 PE=1 SV=1	IDNLAAVFDAR;NYASEALISYFK;WFNTVAASPIVK	0	0	2	3	3	0	0	2	3	3	0	0	5.6	8.5	8.5	0	0	1	2	3	+	6.03802	7.39976	0	4.1676	18	46.52	1.50586	-2.72399	16.7126	16.4596	19.0823	15.4405	16.4459	15.6396	20.1453	20.058	20.2232	20.0597	19.9268	20.0054
Color [DarkGray]	1	4	P14832	P14832	Peptidyl-prolyl cis-trans isomerase	CPR1	CYPH_YEAST Peptidyl-prolyl cis-trans isomerase OS=Saccharomyces cerevisiae (strain ATCC 204508 / S288c) OX=559292 GN=CPR1 PE=1 SV=3	GFGYAGSPFHR;LYNDIVPK;VIPDFMLQGGDFTAGNGTGGK	0	0	1	2	3	0	0	1	2	3	0	0	6.8	11.7	24.7	0	0	0	0	2	+	6.5424	7.4455	0.0033956	1.8842	4	17.39	1.06449	-2.75056	17.9606	20.244	16.0569	18.0003	17.6043	15.8631	20.6769	20.8196	21.0167	20.4017	20.6762	20.7629
Color [DarkGray]	1	4	P00560	P00560	Phosphoglycerate kinase	PGK1	PGK_YEAST Phosphoglycerate kinase OS=Saccharomyces cerevisiae (strain ATCC 204508 / S288c) OX=559292 GN=PGK1 PE=1 SV=2	AGAEIVPK;AHSSMVGFDLPQR;AKGVEVVLPVDFIIADAFSADANTK;ALENPTRPFLAILGGAK;ALLDEVVK;DVTFLNDCVGPEVEAAVK;EGIPAGWQGLDNGPESR;ELPGVAFLSEK;ELPGVAFLSEKK;ELQSLLGKDVTFLNDCVGPEVEAAVK;FRHELSSLADVYINDAFGTAHR;GVEVVLPVDFIIADAFSADANTK;HELSSLADVYINDAFGTAHR;ISHVSTGGGASLELLEGKELPGVAFLSEK;KLFAATVAK;KVLENTEIGDSIFDK;KVLENTEIGDSIFDKAGAEIVPK;LSVQDLDLK;LSVQDLDLKDKR;SSAAGNTVIIGGGDTATVAK;SSAAGNTVIIGGGDTATVAKK;TIVWNGPPGVFEFEK;TVTD…	10	7	22	28	29	10	7	22	28	29	31.2	21.4	60.8	66.8	68.8	4	1	25	33	42	+	7.75641	9.37444	0	245.41	326	44.738	4.10639	-2.76865	21.4704	21.957	21.9585	20.203	18.6081	19.808	24.5895	24.4847	24.6176	24.5171	24.5264	24.6743
Color [DarkGray]	1	4	P08679	P08679	Citrate synthase, peroxisomal	CIT2	CISY2_YEAST Citrate synthase, peroxisomal OS=Saccharomyces cerevisiae (strain ATCC 204508 / S288c) OX=559292 GN=CIT2 PE=1 SV=1	AFGILAQLITDR;DLHPMAQFSIAVTALESESK;ESSFYTVLFGVSR;FSEIYPIHAQDVR;LVSSIYEVAPGVLTEHGK;MGEVDPNADYAK;NLVNLIGSKDEDFVDLMR;SELPSHVVQLLDNLPK;VIPGYGHAVLR	1	0	6	8	6	1	0	6	7	5	7.8	0	23.7	28.9	21.5	0	0	4	7	6	+	5.98405	7.95285	0	14.361	55	51.413	2.35186	-2.77831	17.4334	17.8235	18.9156	16.0289	16.4755	18.0689	20.9693	21.0678	20.4703	20.4165	20.4481	20.5845
Color [DarkGray]	1	4	P26786	P26786	40S ribosomal protein S7-A	RPS7A	RS7A_YEAST 40S ribosomal protein S7-A OS=Saccharomyces cerevisiae (strain ATCC 204508 / S288c) OX=559292 GN=RPS7A PE=1 SV=4	ALAIFVPVPSLAGFHK;ILEDLVFPTEIVGKR;QIVFEIPSETH	0	2	3	2	3	0	2	3	2	3	0	13.7	22.1	14.2	22.1	0	0	1	2	4	+	6.27727	7.52715	0	5.7456	22	21.622	0.955018	-2.83431	16.2523	16.1648	20.3194	20.4112	20.3194	20.2082	20.4077	20.8091	20.0226	20.2367	20.6128	20.6303
Color [DarkGray]	1	4	P17505	P17505	Malate dehydrogenase, mitochondrial	MDH1	MDHM_YEAST Malate dehydrogenase, mitochondrial OS=Saccharomyces cerevisiae (strain ATCC 204508 / S288c) OX=559292 GN=MDH1 PE=1 SV=2	DDLFAINASIVR;DLAAATAESAPNAAILVISNPVNSTVPIVAQVLK;DVIEPSFVDSPLFK;FANAVLSGFKGER;FISEVENTDPTQER;GVATDLSHIPTNSVVK;IHPIGELSSEEEEMLQK;LFGVTTLDSIR;SEGIEFFASPVTLGPDGIEK;VNVIGGHSGITIIPLISQTNHK;VTVLGAGGGIGQPLSLLLK	2	1	10	11	11	2	1	10	11	11	8.4	4.2	54.2	57.5	57.5	0	1	9	16	14	+	6.80242	8.30382	0	143.41	112	35.65	2.50275	-2.84137	18.3112	19.6009	19.6734	18.0166	16.3874	17.5318	21.9862	22.164	21.9594	21.9862	21.8966	22.0014
Color [DarkGray]	1	4	P15108	P15108	ATP-dependent molecular chaperone HSC82	HSC82	HSC82_YEAST ATP-dependent molecular chaperone HSC82 OS=Saccharomyces cerevisiae (strain ATCC 204508 / S288c) OX=559292 GN=HSC82 PE=1 SV=4	AELINNLGTIAK;DLTNLLFETALLTSGFSLEEPTSFASR;ELISNASDALDKIR;GVVDSEDLPLNLSR;HFSVEGQLEFR;HSEFVAYPIQLLVTK;KRVDEGGAQDK;LGVHEDTQNR;LIEAFNEIAEDSEQFDKFYSAFAK;LLDAPAAIR;NFEVLFLTDPIDEYAFTQLK;NIYYITGESLK;NPSDITQEEYNAFYK;QLETEPDLFIR;SPFLDALK;SVDELTSLTDYVTR;TGQFGWSANMER;VFITDEAEDLIPEWLSFVK;VKEEVQELEELNK	0	0	3	3	4	0	0	3	3	4	3.3	5.8	32.5	28.8	35	0	0	2	4	6	+	5.48589	7.63952	0	29.955	38	80.899	2.33963	-2.94224	16.4711	17.9367	17.9596	15.7797	16.0222	15.4854	20.1623	20.6577	20.3742	20.7276	20.879	20.6634
Color [DarkGray]	1	4	P04802	P04802	Aspartate--tRNA ligase, cytoplasmic	DPS1	SYDC_YEAST Aspartate--tRNA ligase, cytoplasmic OS=Saccharomyces cerevisiae (strain ATCC 204508 / S288c) OX=559292 GN=DPS1 PE=1 SV=3	IHDHALLQER;IYTISETPEALPILLEDASR;LLGAPSEGGSSVFEVTYFK;VYEIGPVFR	0	0	3	3	2	0	0	3	3	2	0	0	7	8.6	5.2	0	0	1	2	2	+	5.66068	7.16584	0	5.4035	15	63.515	4.49032	-3.01547	16.6713	16.6885	16.304	15.2379	15.0916	16.2607	19.5155	19.7173	19.4773	19.5805	19.3103	18.9841
Color [DarkGray]	1	4	P00942	P00942	Triosephosphate isomerase	TPI1	TPIS_YEAST Triosephosphate isomerase OS=Saccharomyces cerevisiae (strain ATCC 204508 / S288c) OX=559292 GN=TPI1 PE=1 SV=2	ADVDGFLVGGASLKPEFVDIINSR;ADVDGFLVGGASLKPEFVDIINSRN;ASGAFTGENSVDQIK;ASGAFTGENSVDQIKDVGAK;DKADVDGFLVGGASLKPEFVDIINSR;FALGQGVGVILCIGETLEEK;FALGQGVGVILCIGETLEEKK;ILYGGSANGSNAVTFK;KPQVTVGAQNAYLK;QSIKEIVER;SYFHEDDKFIADK;SYFHEDDKFIADKTK;TFFVGGNFK;WVILGHSERR	3	3	12	11	13	3	3	12	11	13	13.7	14.1	52.4	49.2	52.8	0	1	10	13	20	+	7.20696	8.82907	0	207.85	135	26.795	3.04383	-3.14668	20.4974	21.2251	21.5515	20.6252	18.1216	16.4669	24.3702	23.8966	24.4472	24.4191	24.3485	23.9293
Color [DarkGray]	1	4	P46655	P46655	Glutamate--tRNA ligase, cytoplasmic	GUS1	SYEC_YEAST Glutamate--tRNA ligase, cytoplasmic OS=Saccharomyces cerevisiae (strain ATCC 204508 / S288c) OX=559292 GN=GUS1 PE=1 SV=3	DVVPVDLVDFDHLITK;FAAIFDNGDKEQVAK;IGDIIQFER;LSQSLETLDSQLNLR;NPAVGEKK	2	2	2	1	2	2	2	2	1	2	2.4	2.4	3.4	1.3	3.4	0	0	1	0	1		5.28764	8.93193	0	5.6295	6	80.842	0.290681	-3.22707	25.7359	16.638	15.7509	25.7797	25.4069	25.599	25.7014	16.2845	25.8202	25.9415	25.7929	26.0402
Color [DarkGray]	1	4	P17709	P17709	Glucokinase-1	GLK1	HXKG_YEAST Glucokinase-1 OS=Saccharomyces cerevisiae (strain ATCC 204508 / S288c) OX=559292 GN=GLK1 PE=1 SV=1	DGSGVGAALCALVA;GVLLAADLGGTNFR;HALALSPLGAEGER;IPDDLLDDENVTSDDLFGFLAR;LGFTFSYPVDQTSLNSGTLIR;NILVDLHSQGLLLQQYR;SAYLAAVPLAAILIK;SKIPDDLLDDENVTSDDLFGFLAR;VSGMFLGEVLR;YHPDELAK	0	0	6	8	9	0	0	6	7	8	0	0	20	21.4	26	0	0	4	2	7	+	6.35805	7.88843	0	13.843	46	55.377	3.1948	-3.28701	17.5756	16.5476	16.8533	15.9508	17.1954	16.5752	19.9795	20.413	20.4451	21.1403	21.2967	20.4903
Color [DarkGray]	1	4	P15019	P15019	Transaldolase	TAL1	TAL1_YEAST Transaldolase OS=Saccharomyces cerevisiae (strain ATCC 204508 / S288c) OX=559292 GN=TAL1 PE=1 SV=4	ASGTVVVADTGDFGSIAK;DYKGEADPGVISVK;FQPQDSTTNPSLILAAAK;LFEQEGVSK;LLVEFGKEILK;LSFDTQATIEK;NLAGVDYLTISPALLDK;TTEEQVENAVDR;VANNSLEQLK	0	0	3	7	9	0	0	3	7	9	0	0	11.6	28.4	35.8	0	0	1	4	9	+	6.40931	7.72261	0	16.717	35	37.036	2.67089	-3.2932	16.3438	17.6823	17.7007	16.2603	15.887	15.9992	20.6473	20.2806	20.6786	20.8937	20.6025	20.8061
Color [DarkGray]	1	4	Q12363	Q12363	Transcriptional modulator WTM1	WTM1	WTM1_YEAST Transcriptional modulator WTM1 OS=Saccharomyces cerevisiae (strain ATCC 204508 / S288c) OX=559292 GN=WTM1 PE=1 SV=1	SSTPSTYEHISSLRPK;YNPDDTIAPPQDATEESQTK	0	0	0	1	2	0	0	0	1	2	0	0	0	4.6	8.2	0	0	0	1	2	+	5.27205	6.89195	0	14.51	9	48.382	3.36462	-3.30332	16.6693	16.7754	16.5536	16.8548	16.8062	18.0649	19.934	19.4651	20.5092	19.4124	19.3667	19.9121
Color [DarkGray]	1	4	P20081	P20081	FK506-binding protein 1	FPR1	FKBP_YEAST FK506-binding protein 1 OS=Saccharomyces cerevisiae (strain ATCC 204508 / S288c) OX=559292 GN=FPR1 PE=1 SV=2	GSPFQCNIGVGQVIK;ISPGDGATFPK	0	0	2	2	1	0	0	2	2	1	0	0	22.8	22.8	13.2	0	0	0	2	0	+	6.15703	7.06013	0	3.6233	6	12.158	3.33807	-3.33949	17.0096	16.1432	16.5829	16.0515	18.3615	16.2614	20.2339	19.5627	19.9575	19.2234	18.8695	20.1149
Color [DarkGray]	1	4	P39954	P39954	Adenosylhomocysteinase	SAH1	SAHH_YEAST Adenosylhomocysteinase OS=Saccharomyces cerevisiae (strain ATCC 204508 / S288c) OX=559292 GN=SAH1 PE=1 SV=1	HVILLANGR;VQSEYLGIPEEGPFK	0	0	0	1	2	0	0	0	1	2	0	0	0	3.3	5.3	0	0	0	1	2	+	5.8338	7.11257	0.0018727	2.4558	8	49.125	4.43238	-3.34601	16.6208	16.6449	16.6451	16.9546	16.6906	16.1837	20.2812	19.7029	19.9648	20.0487	19.9573	19.7832
Color [DarkGray]	1	4	P35691	P35691	Translationally-controlled tumor protein homolog	TMA19	TCTP_YEAST Translationally-controlled tumor protein homolog OS=Saccharomyces cerevisiae (strain ATCC 204508 / S288c) OX=559292 GN=TMA19 PE=1 SV=1	DIFSNDELLSDAYDAK	0	0	1	1	1	0	0	1	1	1	0	0	9.6	9.6	9.6	0	0	0	1	1	+	6.27766	7.18076	0	5.0765	6	18.741	1.77723	-3.37815	18.2335	15.7313	18.3355	16.6578	17.2106	16.8928	20.6994	20.8544	20.8809	20.4624	20.4974	20.5083
Color [DarkGray]	1	4	P06106	P06106	Protein MET17;O-acetylhomoserine sulfhydrylase;O-acetylserine sulfhydrylase	MET17	CYSD_YEAST Homocysteine/cysteine synthase OS=Saccharomyces cerevisiae (strain ATCC 204508 / S288c) OX=559292 GN=MET17 PE=1 SV=3	HGSQLFGLEVPGYVYSR;LASNLANVGDAK;LSGAQVVDNLK;PSHFDTVQLHAGQENPGDNAHR;YGADIVTHSATK;YNVPDFEK	0	0	2	2	2	0	0	2	2	2	0	0	7.7	5.4	5.4	0	0	1	3	2	+	5.98166	7.45535	0	7.9132	23	48.671	2.62092	-3.39234	16.7155	16.7314	17.0677	16.1992	17.5334	18.2522	19.3978	20.2241	21.0698	20.581	20.6788	20.8311
Color [DarkGray]	1	4	P32419	P32419	Malate dehydrogenase, peroxisomal	MDH3	MDHP_YEAST Malate dehydrogenase, peroxisomal OS=Saccharomyces cerevisiae (strain ATCC 204508 / S288c) OX=559292 GN=MDH3 PE=1 SV=3	AETFLVDYLMLK;AQQLVGDNSIEYFSLPIVLR;EEQLVNTAVKELR;ILVISNPVNSLVPIAVETLK;VAILGASGGVGQPLSLLLK;VQFGGDEIVK	0	0	2	3	4	0	0	2	3	4	0	0	8.7	12.5	16	0	0	0	2	2	+	6.13239	7.82164	0	3.237	10	37.186	1.8433	-3.40817	17.1438	19.5291	19.6774	16.4184	15.6942	17.365	22.2667	22.0873	22.2208	22.8025	22.1784	22.2451
Color [DarkGray]	1	4	P02829	P02829	ATP-dependent molecular chaperone HSP82	HSP82	HSP82_YEAST ATP-dependent molecular chaperone HSP82 OS=Saccharomyces cerevisiae (strain ATCC 204508 / S288c) OX=559292 GN=HSP82 PE=1 SV=1	AELINNLGTIAK;ALKEILGDQVEK;ELISNASDALDKIR;GVVDSEDLPLNLSR;HFSVEGQLEFR;HSEFVAYPIQLVVTK;KRVDEGGAQDK;LEEVDEEEEKKPK;LGVHEDTQNR;LIEAFNEIAEDSEQFEK;LLDAPAAIR;LLYETALLTSGFSLDEPTSFASR;NFEVLFLTDPIDEYAFTQLK;NIYYITGESLK;NPSDITQEEYNAFYK;QLETEPDLFIR;SPFLDALK;SVDELTSLTDYVTR;TGQFGWSANMER;VFITDEAEDLIPEWLSFVK	2	3	14	14	17	0	0	1	3	4	3.2	5.8	26.5	27.1	33.3	0	2	9	10	13	+	6.91858	8.57015	0	166.16	93	81.405	1.99392	-3.41231	17.7611	19.6848	20.1983	17.0061	19.4477	17.2475	22.7043	22.6664	22.5105	22.6746	22.5376	22.6485
Color [DarkGray]	1	4	P19414	P19414	Aconitate hydratase, mitochondrial	ACO1	ACON_YEAST Aconitate hydratase, mitochondrial OS=Saccharomyces cerevisiae (strain ATCC 204508 / S288c) OX=559292 GN=ACO1 PE=1 SV=2	AIDLNKEVYDFLASATAK;DLLSADKDAEYDEVVEIDLNTLEPYINGPFTPDLATPVSK;FLGGFAIITK;GYDAGENTYQAPPADR;ILYGHLDDPHGQDIQR;NDGNPQTHAFVASPELVTAFAIAGDLR;QGLLPLNFK;QNVETLDIVR;SASIVKDAAAHGLK;TIFTVTPGSEQIR;VGLIGSCTNSSYEDMSR;VNQNLLEDHSFINYK;WVVIGDENFGEGSSR	1	1	9	8	9	1	1	9	8	9	1.2	1.2	19	15.7	17.5	0	0	5	3	8	+	6.28682	8.14073	0	48.502	55	85.367	3.68022	-3.45888	18.2221	18.2717	17.6349	17.6607	16.9441	16.3447	21.314	21.8488	21.3426	21.9231	21.5895	22.0061
Color [DarkGray]	1	4	P24280	P24280	SEC14 cytosolic factor	SEC14	SEC14_YEAST SEC14 cytosolic factor OS=Saccharomyces cerevisiae (strain ATCC 204508 / S288c) OX=559292 GN=SEC14 PE=1 SV=3	KDYGTDTILQDFHYDEKPLIAK;LFKPFLDPVTVSK	0	0	2	2	2	0	0	2	2	2	0	0	11.5	11.5	11.5	0	0	0	2	1	+	5.42116	7.05488	0.0018762	2.4583	5	34.9	2.9894	-3.45965	16.537	16.732	16.0192	17.9628	16.8972	16.3082	20.5202	19.3366	19.8104	19.6443	15.8279	19.6658
Color [DarkGray]	1	4	P38116	P38116	ADP-ribosylation factor-like protein 1	ARL1	ARL1_YEAST ADP-ribosylation factor-like protein 1 OS=Saccharomyces cerevisiae (strain ATCC 204508 / S288c) OX=559292 GN=ARL1 PE=1 SV=4	CYYADTAAVIFVVDSTDKDR;ILILGLDGAGK;QDQPGALSASEVSK	0	0	2	1	1	0	0	2	1	1	0	0	13.7	7.7	7.7	0	0	2	1	1	+	5.95719	6.99859	0	7.3721	13	20.434	2.56613	-3.47659	17.5067	15.8292	16.1904	16.9176	15.2227	15.5306	19.8986	20.2403	19.8171	16.6748	19.8028	19.2957
Color [DarkGray]	1	4	P41338	P41338	Acetyl-CoA acetyltransferase	ERG10	THIL_YEAST Acetyl-CoA acetyltransferase OS=Saccharomyces cerevisiae (strain ATCC 204508 / S288c) OX=559292 GN=ERG10 PE=1 SV=3	EQQDNFAIESYQK;GWGEAAHQPADFTWAPSLAVPK;NLKPLAIIK;TAVELGAVALK;VPELDASKDFDEIIFGNVLSANLGQAPAR	0	0	0	5	4	0	0	0	5	4	0	0	0	21.1	17.8	0	0	0	3	1	+	5.87981	7.52393	0	20.12	21	41.728	3.20185	-3.54978	16.1353	15.8478	17.0411	18.2841	16.3301	16.0658	19.9862	19.9204	19.7671	20.6299	20.6825	20.6757
Color [DarkGray]	1	4	P23254	P23254	Transketolase 1	TKL1	TKT1_YEAST Transketolase 1 OS=Saccharomyces cerevisiae (strain ATCC 204508 / S288c) OX=559292 GN=TKL1 PE=1 SV=4	FFGFTPEGVAER;KFPELGAELAR;QNLPQLEGSSIESASK;SLPNIQVWRPADGNEVSAAYK;VVSLPDFFTFDK;YAHQSFGIDR	0	0	2	5	6	0	0	2	5	6	0	0	3.2	9	12.1	0	0	1	4	5	+	5.87847	7.56017	0	9.6873	31	73.805	2.32103	-3.60179	16.3653	18.4428	16.8413	15.9322	16.39	18.0259	20.7336	20.7158	21.0054	20.5318	20.0765	21.3784
Color [DarkGray]	1	4	P04806	P04806	Hexokinase-1	HXK1	HXKA_YEAST Hexokinase-1 OS=Saccharomyces cerevisiae (strain ATCC 204508 / S288c) OX=559292 GN=HXK1 PE=1 SV=2	DTLPLGFTFSYPASQNK;ELMDEIHQLEDMFTVDSETLR;ESGNYLAIDLGGTNLR;GFDIPNVEGHDVVPLLQNEISK;GFDIPNVEGHDVVPLLQNEISKR;HFIDELNK;HFIDELNKGLTK;IEDDPFENLEDTDDIFQK;LADDIPSNSPMAINCEYGSFDNEHLVLPR;LCELIGTR;LKQPYIMDTSYPAR;LVLLELNEK;MTSGYYLGELLR;TGHIAADGSVYNKYPGFK;TKYDVAVDEQSPRPGQQAFEK	2	0	12	12	15	2	0	12	12	15	7	0	38.6	37.7	44.9	0	0	9	15	14	+	6.70988	8.50537	0	74.804	125	53.738	1.95506	-3.63549	17.4608	19.5785	20.1073	15.9063	15.4622	15.6777	22.7282	22.5098	22.8151	22.6618	22.6339	22.2367
Color [DarkGray]	1	4	P38115	P38115	D-arabinose dehydrogenase [NAD(P)+] heavy chain	ARA1	ARA1_YEAST D-arabinose dehydrogenase [NAD(P)+] heavy chain OS=Saccharomyces cerevisiae (strain ATCC 204508 / S288c) OX=559292 GN=ARA1 PE=1 SV=1	IPALGLGTANPHEK;ISSSIEFASLTKDELQELNDFGEKYPVR;IYLDPNDHR	0	0	1	1	2	0	0	1	1	2	0	0	4.1	4.1	12.2	0	0	1	1	2	+	5.5983	6.99122	0	6.7822	9	38.883	2.88931	-3.68207	16.6262	17.1826	15.8151	16.3214	15.3124	15.1941	19.9129	20.6645	20.0926	20.0495	20.051	15.6321
Color [DarkGray]	1	4	P32582	P32582	Cystathionine beta-synthase	CYS4	CBS_YEAST Cystathionine beta-synthase OS=Saccharomyces cerevisiae (strain ATCC 204508 / S288c) OX=559292 GN=CYS4 PE=1 SV=1	AVVAGAGTGGTISGISK;STLIEPTSGNTGIGLALIGAIK;TPTAAAWDSPESHIGVAK	0	0	1	3	3	0	0	1	3	3	0	0	4.3	11.2	11.2	0	0	0	1	2	+	5.63065	7.22235	0	7.416	10	56.021	2.147	-3.71485	15.5237	15.5615	17.7096	16.5847	15.2919	17.8844	19.7443	20.0407	20.1544	19.8038	19.6076	19.396
Color [DarkGray]	1	4	Q12751	Q12751	RNA polymerase II assembly factor RTP1	RTP1	RTP1_YEAST RNA polymerase II assembly factor RTP1 OS=Saccharomyces cerevisiae (strain ATCC 204508 / S288c) OX=559292 GN=RTP1 PE=1 SV=1	SSDNHSGMPSVTDNALILMDLK	1	0	1	1	1	1	0	1	1	1	2.2	0	2.2	2.2	2.2	0	0	1	1	0	+	5.85032	7.53156	0.0093897	1.4277	6	113.25	0.995819	-3.74287	22.32	17.1048	17.2303	16.0957	16.5115	19.8803	23.0017	21.8376	23.0444	20.5911	20.612	20.4344
Color [DarkGray]	1	4	P37012;P33401	P37012	Phosphoglucomutase 2	PGM2	PGM2_YEAST Phosphoglucomutase 2 OS=Saccharomyces cerevisiae (strain ATCC 204508 / S288c) OX=559292 GN=PGM2 PE=1 SV=1	CTGGIILTASHNPGGPENDMGIK;IIKDFPELDLGTIGK;LSGTGSSGATIR;QVLGTEEPTVR;SFQIETVPTKPYEDQKPGTSGLR;TAEEYLKPIINSVIK;TIQNEFWAK;YDFEKVETEK	1	0	3	3	7	1	0	3	3	7	2.6	0	8.8	6.5	16.7	0	0	3	3	9	+	5.91191	7.76287	0	34.401	42	63.088	3.78701	-4.03403	17.6039	17.2517	17.0321	15.3682	16.5194	16.5	20.888	21.7227	21.379	21.8828	21.5657	21.1833
Color [DarkGray]	1	4	P54839	P54839	Hydroxymethylglutaryl-CoA synthase	ERG13	HMCS_YEAST Hydroxymethylglutaryl-CoA synthase OS=Saccharomyces cerevisiae (strain ATCC 204508 / S288c) OX=559292 GN=ERG13 PE=1 SV=1	ANPQLFPEVDAELATR;DYDESLTDKNIEK;GIQIYIPTQCVNQSELEKFDGVSQGK;GLVSDPAGSDALNVLK;YFDYNVFHVPTCK	0	0	0	2	3	0	0	0	2	3	0	0	0	5.3	8.6	0	0	0	2	2	+	5.89969	7.42867	0	45.579	18	55.013	4.15094	-4.33079	16.8646	16.1034	16.1617	16.3273	17.6484	15.7468	20.6806	20.597	20.8443	20.7552	20.7361	21.1105
Color [DarkGray]	1	4	P43567	P43567	Alanine--glyoxylate aminotransferase 1	AGX1	AGX1_YEAST Alanine--glyoxylate aminotransferase 1 OS=Saccharomyces cerevisiae (strain ATCC 204508 / S288c) OX=559292 GN=AGX1 PE=1 SV=1	ALDVPSLGHTSPEFVSIFQR;IGESVPLELITEK;SVDTLLIPGPIILSGAVQK;SYGAQVDVVRPLK	0	1	2	4	4	0	1	2	4	4	0	3.4	8.3	16.9	16.9	0	0	1	3	5	+	5.94285	7.53596	0	7.4982	20	41.907	3.2997	-4.35561	16.4671	15.7661	17.1705	18.9706	15.5736	16.4201	21.0597	20.6636	20.7472	20.7139	20.6112	20.2202
Color [DarkGray]	1	4	P30952;P21826	P30952	Malate synthase 1, glyoxysomal	MLS1	MASY_YEAST Malate synthase 1, glyoxysomal OS=Saccharomyces cerevisiae (strain ATCC 204508 / S288c) OX=559292 GN=MLS1 PE=1 SV=1	ATPTDLSKL;ATVLIETLPAAFQMEEIIYQLR;DALEFIVLLHR;FSEFLTTLLYDEIVSTK;GSGCVPINNLMEDAATAEVSR;GVHAMGGMAAQIPIKDDPAANEK;KLDSGSYHLDFLPETANIR;LDSGSYHLDFLPETANIR;LLVDVDKEPFFKPSSTTVGDILTK;LNGNVANLPTIIVRPR;LRNDPNHILPNR;LWNDVFCVAQDYIGIPR;MEHHLEAK;NDPNHILPNR;NDPTWQGPILAPGLINR;NQIDFDTPR;NQIDFDTPRK;STEITGPPLR;VKVSLDNVK;VTPELTEK;WDYIFSTIK;WDYIFSTIKR	2	2	17	19	21	2	2	17	19	21	4.7	6.5	38.6	41.5	46	0	0	5	11	19	+	6.99901	8.62847	0	76.487	122	62.79	4.19252	-4.47593	17.6811	18.337	18.3235	16.8814	16.9461	16.8706	22.3121	22.7081	22.7492	23.1049	23.0086	22.7887
Color [DarkGray]	1	4	P04807	P04807	Hexokinase-2	HXK2	HXKB_YEAST Hexokinase-2 OS=Saccharomyces cerevisiae (strain ATCC 204508 / S288c) OX=559292 GN=HXK2 PE=1 SV=4	DIYGWTQTSLDDYPIK;ESGDFLAIDLGGTNLR;IFTVPTETLQAVTK;TKYDITIDEESPRPGQQTFEK	0	0	0	3	4	0	0	0	3	4	0	0	0	10.5	13.8	0	0	0	2	4	+	5.69812	7.33883	0	5.7418	20	53.942	3.13146	-4.47678	15.2191	15.2828	16.6895	18.3881	15.7638	19.8859	20.1912	20.2562	20.1744	20.1113	20.2749	19.9693
Color [DarkGray]	1	4	P11412	P11412	Glucose-6-phosphate 1-dehydrogenase	ZWF1	G6PD_YEAST Glucose-6-phosphate 1-dehydrogenase OS=Saccharomyces cerevisiae (strain ATCC 204508 / S288c) OX=559292 GN=ZWF1 PE=1 SV=4	CVTFAAMTFNIENERWEGVPIMMR;SEDGSKPAYVDDDTVDKDSK	0	1	1	1	1	0	1	1	1	1	0	4.8	4.8	4.8	4.8	0	0	0	0	0	+	6.34313	7.83449	0	3.462	2	57.521	2.79162	-5.28933	16.029	16.9079	18.3983	22.1664	17.3251	22.3313	22.2293	22.4889	22.485	22.2103	21.9141	22.2562
[truncated: 3 more columns]

## Sheet: + RNase
Symbol color	Symbol type	Symbol size	Protein IDs	Majority protein IDs	Protein names	Gene names	Fasta headers	Peptide sequences	Razor + unique peptides Mum_minusR_1	Razor + unique peptides Mum_plusR_1	Razor + unique peptides Slz1_1	Razor + unique peptides WT_minusR_1	Razor + unique peptides WT_plusR_1	Unique peptides Mum_minusR_1	Unique peptides Mum_plusR_1	Unique peptides Slz1_1	Unique peptides WT_minusR_1	Unique peptides WT_plusR_1	Sequence coverage Mum_minusR_1 [%]	Sequence coverage Mum_plusR_1 [%]	Sequence coverage Slz1_1 [%]	Sequence coverage WT_minusR_1 [%]	Sequence coverage WT_plusR_1 [%]	MS/MS count Mum_minusR_1	MS/MS count Mum_plusR_1	MS/MS count Slz1_1	MS/MS count WT_minusR_1	MS/MS count WT_plusR_1	t-test Significant LFQ log2 [Mum2+]/[wt +] s0=1	iBAQ	Intensity	Q-value	Score	MS/MS count	Mol. weight [kDa]	-Log t-test p value LFQ log2 [Mum2+]/[wt +] s0=1	t-test Difference LFQ log2 [Mum2+]/[wt +] s0=1	LFQ intensity Mum_minusR_1	LFQ intensity Mum_minusR_2	LFQ intensity Mum_minusR_3	LFQ intensity Mum_plusR_1	LFQ intensity Mum_plusR_2	LFQ intensity Mum_plusR_3	LFQ intensity WT_minusR_1	LFQ intensity WT_minusR_2	LFQ intensity WT_minusR_3	LFQ intensity WT_plusR_1	LFQ intensity WT_plusR_2	LFQ intensity WT_plusR_3
Color [DarkGray]	1	4	P41833	P41833	N6-adenosine-methyltransferase IME4	IME4	IME4_YEAST N6-adenosine-methyltransferase IME4 OS=Saccharomyces cerevisiae (strain ATCC 204508 / S288c) OX=559292 GN=IME4 PE=1 SV=1	ADRETASENKR;AIELGKESLNNWGYNVINEVSWIK;AKYTTEVIEYIPICSDYSHASLLSTSVYIVNNK;ALPAQWIR;APLSGQLKDVYSLYISGGYDDEMQK;APLSGQLKDVYSLYISGGYDDEMQKLR;DHNTRPGWFTIGNQLTGNCIYEMDVER;DHNTRPGWFTIGNQLTGNCIYEMDVERK;DVYSLYISGGYDDEMQK;DVYSLYISGGYDDEMQKLR;EHLLVGLK;EHLLVGLKGNPK;EKPSSFQLAK;EKPSSFQLAKER;ESLNNWGYNVINEVSWIK;ESLNNWGYNVINEVSWIKTNQLGR;ETSRKPDELYGIAER;FHAFYYTLK;HIDVDLIVSMTR;HTPFESK;IHFIPNIK;IHFIPNIKPQTDISLGDCSYLDTC…	33	39	40	0	2	33	39	40	0	2	57.2	58.7	59.8	0	3.5	67	113	152	0	0	+	9.06461	10.8137	0	323.31	1041	69.395	4.78989	15.6946	27.5727	28.4437	28.4762	29.3529	29.4703	29.3248	16.9341	16.2212	15.9861	12.9062	13.2087	14.9492
Color [DarkGray]	1	4	P25583	P25583	Karyogamy protein KAR4	KAR4	KAR4_YEAST Karyogamy protein KAR4 OS=Saccharomyces cerevisiae (strain ATCC 204508 / S288c) OX=559292 GN=KAR4 PE=1 SV=1	AFQDPTYDQNK;AFQDPTYDQNKSR;AKQINQFATTPFGCK;DFHTNDYSNNYIHGK;DTTNGAVPSHLYR;EEIANLGSNIPLK;HINNSHLQGPNQETIEMK;HVSFKPSR;IAENFSTATR;IAENFSTATRR;KSPFYPGLDQDDETLMEK;LISKPGFLFIWANSQK;LISKPGFLFIWANSQKINELTK;LLNNEIWAK;LLNNEIWAKK;MQWHCWMCITGTVR;NEIELLRPR;PGFLFIWANSQK;QINQFATTPFGCK;RLHIIPAR;RSEELVFVPIDK;RSEELVFVPIDKK;RSTDGHLIHCNVDTDLSIETK;SEELVFVPIDK;SEELVFVPIDKK;SKHVSFKPSR;SLPQQHVTNIENR;SLPQQHVTNIENRVDGYPK;SP…	33	35	36	0	3	33	35	36	0	3	76.4	79.1	80.9	0	12.2	76	119	132	0	0	+	9.27869	10.813	0	323.31	1031	38.672	6.21112	14.682	28.5007	28.5564	28.5863	29.297	29.2186	29.357	16.5442	15.4979	14.5547	15.0855	14.1914	14.5497
Color [DarkGray]	1	4	P53185	P53185	Uncharacterized protein YGL036W	YGL036W	YG036_YEAST Uncharacterized protein YGL036W OS=Saccharomyces cerevisiae (strain ATCC 204508 / S288c) OX=559292 GN=YGL036W PE=1 SV=1	AQSIHIDDFENENN;CAGHAPLVTAASR;CLNLTILLISK;DEGHKEKEENINLIGSSSVK;DFESELR;DGSDDDNLIK;DGSDDDNLIKK;DYITLWNDGSEVYNAFYK;DYITLWNDGSEVYNAFYKELFYEEQPK;DYQVDFFIITSLASTSSLEVLPSHYFVYK;EENINLIGSSSVK;EENINLIGSSSVKK;EKEENINLIGSSSVK;EKEENINLIGSSSVKK;EKNLALYHLIK;ELDVFSPLLQSAVTAANNSNIIWDLIAVLFAYISIHK;ELFYEEQPK;IDWTQSYQTR;IKPIKLTTSDLLK;ISHFPNLIDPK;ISINLLNHLFFHQIR;ISINLLNHLFFHQIRDGSDDDNLIK;ISINLLNHLFFHQIRDGSDDDNLIKK;I…	50	57	55	2	4	50	57	55	2	4	57.1	59	59	2.6	5.3	109	175	214	1	1	+	9.41228	11.1678	0	323.31	1493	102.37	6.35845	12.0141	29.3247	29.4323	29.4537	30.1487	30.3188	30.2142	17.5498	18.6641	18.5784	18.5772	18.1329	17.9294
Color [DarkGray]	1	4	P38236	P38236	Protein MUM2	MUM2	MUM2_YEAST Protein MUM2 OS=Saccharomyces cerevisiae (strain ATCC 204508 / S288c) OX=559292 GN=MUM2 PE=1 SV=1	DDRMEALEVELQIK;DDRMEALEVELQIKESQIESLENEIQR;DTNGNPNDSMSSMSNMTAK;EKELAETK;EKELAETKENLESILTALALNPTNSVTK;EKIASLEAHLASK;EKIASLEAHLASKESSK;ELAETKENLESILTALALNPTNSVTK;ENCHIPQTFELPASLEVIFR;ENCHIPQTFELPASLEVIFRK;ENLESILTALALNPTNSVTK;ENLESILTALALNPTNSVTKYGR;ESQIESLENEIQR;ETQIELQLAK;ETQIELQLAKK;ETQIELQLAKKENLELR;IASLEAHLASK;IASLEAHLASKESSK;IFNEGLNYK;IFNEGLNYKQNEHK;IFNEGLNYKQNEHKYEK;KENLELREK;KIFNEGLNYK;KIFN…	46	46	47	3	9	46	46	47	3	9	72.7	72.7	72.7	7.7	19.7	120	191	245	3	5	+	9.99168	11.3963	0	323.31	1757	41.433	6.60906	11.0439	30.6288	30.6595	30.6299	31.331	31.2892	31.3987	18.9002	19.6133	19.9015	20.005	20.3534	20.5288
Color [DarkGray]	1	4	P40167	P40167	Sporulation-specific with a leucine zipper motif protein 1	SLZ1	SLZ1_YEAST Sporulation-specific with a leucine zipper motif protein 1 OS=Saccharomyces cerevisiae (strain ATCC 204508 / S288c) OX=559292 GN=SLZ1 PE=1 SV=1	AFGEERK;DSQFVLQDMEFTSWER;DSQFVLQDMEFTSWERR;EVEKENYK;EVEKENYKR;IMIDQAIQTSSPLNVQLTELFNDNVLDVSK;KLLQQEMEYSNK;KLLQQEMEYSNKVK;LCMDEKPVPDAGITMQQASR;LLQQEMEYSNK;LLQQEMEYSNKVK;MMNKVDQIIGYK;MMNKVDQIIGYKK;MNKVDQIIGYK;MNKVDQIIGYKK;NVTIGLER;PKPQTGLDFDIDHQTVSK;PQTGLDFDIDHQTVSK;RWSNCSTTSNATTVSSVPDPK;VDQIIGYK;VDQIIGYKK;VKNVTIGLER;WSEFPTCCDQAAI;WSNCSTTSNATTVSSVPDPK;YEVKLPK	22	23	1	2	1	22	23	1	2	1	54.4	56.7	3.7	13.8	3.7	59	104	0	0	0	+	8.97977	10.286	0	323.31	513	34.317	7.10467	10.9523	28.0382	28.0826	28.1407	29.1419	29.0772	29.0463	18.0052	18.1739	18.3935	17.9273	18.3187	18.1625
Color [DarkGray]	1	4	Q02647	Q02647	Dynein light chain 1, cytoplasmic	DYN2	DYL1_YEAST Dynein light chain 1, cytoplasmic OS=Saccharomyces cerevisiae (strain ATCC 204508 / S288c) OX=559292 GN=DYN2 PE=1 SV=1	ASDITDKLK;ASDITDKLKEDILTISK;DALDKYQLER;DALDKYQLERDIAGTVK;DIAGTVK;EDILTISKDALDKYQLER;LKEDILTISK;NFGSYVTHEK;SDENKSTPIVK;YGNTWHVIVGK	7	10	0	0	0	7	10	0	0	0	71.7	71.7	0	0	0	7	12	0	0	0	+	8.43361	9.42415	0	23.454	59	10.441	7.91368	10.7763	25.487	25.4552	25.5805	27.2478	27.2066	27.4204	17.6265	16.3082	16.4019	16.5762	16.4927	16.4769
Color [DarkGray]	1	4	P40344	P40344	Autophagy-related protein 3	ATG3	ATG3_YEAST Autophagy-related protein 3 OS=Saccharomyces cerevisiae (strain ATCC 204508 / S288c) OX=559292 GN=ATG3 PE=1 SV=1	DMAQERYYDLYIAYSTSYRVPK;GFAEDGDEDDVLEYIGSETEHVQSTPAGGTK	1	1	1	2	0	1	1	1	2	0	7.1	7.1	7.1	17.1	0	0	1	0	2	0	+	8.37537	9.48933	0.0036765	2.3002	5	35.887	2.3777	10.5519	29.3013	16.948	29.2928	25.1978	30.3388	25.5181	25.4188	25.9479	25.4428	16.3864	17.6785	15.3341
Color [DarkGray]	1	4	P32445	P32445	Single-stranded DNA-binding protein RIM1, mitochondrial	RIM1	RIM1_YEAST Single-stranded DNA-binding protein RIM1, mitochondrial OS=Saccharomyces cerevisiae (strain ATCC 204508 / S288c) OX=559292 GN=RIM1 PE=1 SV=1	DDGSKGTTLSLVQK;DGQTNWYNITVFNEPQINFLTEYVR;DGQTNWYNITVFNEPQINFLTEYVRK;GALVYVEADAANYVFER;GALVYVEADAANYVFERDDGSK;GALVYVEADAANYVFERDDGSKGTTLSLVQK;GTTLSLVQK;IGSEFTEHTSANNNR;KGALVYVEADAANYVFER;KGALVYVEADAANYVFERDDGSK;KLEDAEGQENAASSE;LEDAEGQENAASSE;RDGQTNWYNITVFNEPQINFLTEYVR;RDGQTNWYNITVFNEPQINFLTEYVRK;YSIASQPR	1	15	0	0	0	1	15	0	0	0	11.1	71.1	0	0	0	0	29	0	0	0	+	8.36614	9.41596	0	323.31	87	15.386	8.065	10.462	15.4552	16.4274	18.1705	27.6449	27.6783	27.5463	17.0255	15.7597	17.1824	17.1547	17.0766	17.252
Color [DarkGray]	1	4	P32787	P32787	Mitochondrial genome maintenance protein MGM101	MGM101	MG101_YEAST Mitochondrial genome maintenance protein MGM101 OS=Saccharomyces cerevisiae (strain ATCC 204508 / S288c) OX=559292 GN=MGM101 PE=1 SV=1	AFGAGGWGLVPR;CCKDLGVGSELWDPVFIKK;DIEIKPDGLIYLPEIK;DLGVGSELWDPVFIK;DLGVGSELWDPVFIKK;EYGLICHGQLISVAR;EYSSGINSK;FKVDHCTEK;FVEHVTTK;GDIDWYTSWYGLGMKPFEAK;GEQDYFNEAGIPTATEGCK;KSFNSTETKPVFATK;LGGTPLETR;SFNSTETKPVFATK;STADDSLNNSYK	1	15	1	1	1	1	15	1	1	1	7.1	60.6	3.3	5.6	5.6	0	22	0	0	0	+	7.52881	8.9985	0	198.56	60	30.09	4.88417	8.4876	14.2345	16.9252	13.7122	25.9108	25.7978	24.9439	15.5711	17.2154	16.9895	17.0653	17.2644	16.8599
Color [DarkGray]	1	4	P22336	P22336	Replication factor A protein 1	RFA1	RFA1_YEAST Replication factor A protein 1 OS=Saccharomyces cerevisiae (strain ATCC 204508 / S288c) OX=559292 GN=RFA1 PE=1 SV=1	AREDTYNDQSR;ATAFNDFATK;DTVIEECFDESNVPK;FNEILQEGK;GDFHSIFTNK;GDGKLFNVNFLDTSGEIR;ITQSIQMNEYDFR;KFANENPNSQK;KNLIMISDGIYHMK;LDAIQNQEVNSNVDVLGIIQTINPHFELTSR;LFNVNFLDTSGEIR;LQPAKPQFTNLTHPYELNLDRDTVIEECFDESNVPK;NLIMISDGIYHMK;QEPGMGGQSAASLTK;QLLGVDANTLMSLKEEDPNEFTK;QRYDNPTGGVYQVYNTR;SEKGDFFSVK;SLSMGFSSTLIPNPEIPEAYALK;TRPIFAIEQLSPYQNVWTIK;VDNFAYPACSNENCNK;VDNFAYPACSNENCNKK;VIIAEPAIVR;VLEQPDGTWR;YDNPTGGVYQ…	0	24	0	0	1	0	24	0	0	1	0	50.2	0	0	2.3	0	30	0	0	0	+	7.04743	8.71583	0	128.76	96	70.347	3.32313	7.88562	16.3766	16.8377	17.0228	24.1678	22.6867	24.2328	17.6473	16.7584	16.3381	14.7719	15.9584	16.7002
Color [DarkGray]	1	4	P05317	P05317	60S acidic ribosomal protein P0	RPP0	RLA0_YEAST 60S acidic ribosomal protein P0 OS=Saccharomyces cerevisiae (strain ATCC 204508 / S288c) OX=559292 GN=RPP0 PE=1 SV=2	AGAVAPEDIWVR;AVNTGMEPGK;AVNTGMEPGKTSFFQALGVPTK;GFLSDLPDFEK;GFLSDLPDFEKLLPFVK;GNVGFVFTNEPLTEIK;GTIEIVSDVK;LREYLEEYK;SLFVVGVDNVSSQQMHEVR;SLFVVGVDNVSSQQMHEVRK;TSFFQALGVPTK	8	11	0	1	1	8	11	0	1	1	28.8	34	0	3.2	3.8	5	15	0	0	0	+	7.27802	8.46106	0	141.64	53	33.717	4.8364	7.54518	21.2343	21.4368	21.6258	24.1434	24.039	24.3038	17.1187	16.2778	17.8811	16.148	17.1427	16.56
Color [DarkGray]	1	4	P54780;P05748	P54780;P05748	60S ribosomal protein L15-B;60S ribosomal protein L15-A	RPL15B;RPL15A	RL15B_YEAST 60S ribosomal protein L15-B OS=Saccharomyces cerevisiae (strain ATCC 204508 / S288c) OX=559292 GN=RPL15B PE=1 SV=2;RL15A_YEAST 60S ribosomal protein L15-A OS=Saccharomyces cerevisiae (strain ATCC 204508 / S288c) OX=559292 GN=RPL15A PE=1 SV=3	AKQGFVIYR;GATYGKPTNQGVNELK;VLNSYWVNQDSTYK;YFEVILVDPQHK;YNWICNPVHK	4	5	0	0	0	4	5	0	0	0	25	29.9	0	0	0	6	8	0	0	0	+	7.10438	8.31385	0	51.144	40	24.422	3.23394	7.11529	21.6981	22.5267	22.6778	23.6204	23.6259	23.5042	16.0539	16.3885	17.2675	15.071	16.8845	17.4492
Color [DarkGray]	1	4	P14126	P14126	60S ribosomal protein L3	RPL3	RL3_YEAST 60S ribosomal protein L3 OS=Saccharomyces cerevisiae (strain ATCC 204508 / S288c) OX=559292 GN=RPL3 PE=1 SV=4	AHLAEIQLNGGSISEK;GHGFEGVTHR;HAFMGTLK;HGHLGFLPR;KALEEVSLK;KSLYTNTSR;SKPVALTSFLGYK;SLTTVWAEHLSDEVK;SLYTNTSR;TITPMGGFVHYGEIKNDFIMVK;TVAVDSVFEQNEMIDAIAVTK;VGKGDDEANGATSFDR;VLVHTQIR;YAQDGAGIER	10	14	0	0	1	10	14	0	0	1	32.8	42.9	0	0	2.3	9	15	0	0	0	+	7.24388	8.59209	0	26.67	62	43.757	4.05984	7.02982	23.0207	22.7983	23.5731	24.4017	23.4718	24.2686	15.6733	17.1764	17.1818	16.6919	16.6907	17.6701
Color [DarkGray]	1	4	P17076	P17076	60S ribosomal protein L8-A	RPL8A	RL8A_YEAST 60S ribosomal protein L8-A OS=Saccharomyces cerevisiae (strain ATCC 204508 / S288c) OX=559292 GN=RPL8A PE=1 SV=4	AEDEAALAK;LGTLVNQK;LKVPPTIAQFQYTLDR;LVLIANDVDPIELVVFLPALCK;LVSTIDANFADKYDEVK;LVSTIDANFADKYDEVKK;NFGIGQAVQPK;NPLTHSTPK;TSAVAALTEVR;TSAVAALTEVRAEDEAALAK;YGLNHVVALIENK;YGLNHVVALIENKK;YRPETAAEK	5	12	0	0	0	0	1	0	0	0	22.3	49.6	0	0	0	6	12	0	0	0	+	7.06179	8.48204	0	34.409	54	28.124	3.28731	6.97391	23.0062	22.8663	22.8408	23.6388	23.4952	23.7437	16.5349	18.7836	17.1658	15.8086	16.1532	17.9941
Color [DarkGray]	1	4	P0CX40;P0CX39	P0CX40;P0CX39	40S ribosomal protein S8-B;40S ribosomal protein S8-A	RPS8B;RPS8A	RS8B_YEAST 40S ribosomal protein S8-B OS=Saccharomyces cerevisiae (strain ATCC 204508 / S288c) OX=559292 GN=RPS8B PE=1 SV=1;RS8A_YEAST 40S ribosomal protein S8-A OS=Saccharomyces cerevisiae (strain ATCC 204508 / S288c) OX=559292 GN=RPS8A PE=1 SV=1	AAIVQIDATPFR;CDGYILEGEELAFYLR;CDGYILEGEELAFYLRR;IAGVVYHPSNNELVR;IESSVESQFSAGR;IETGNFSWASEGISK;IETGNFSWASEGISKK;LYACISSRPGQSGR;QWFEAHYGQTLGK	5	8	0	0	1	5	8	0	0	1	35	49.5	0	0	6	4	10	0	0	0	+	7.06543	8.25416	0	47.321	42	22.489	4.34263	6.89354	22.8318	22.6983	22.8536	23.2647	23.3058	23.3253	17.4605	17.6442	16.4897	16.9025	16.6138	15.6988
Color [DarkGray]	1	4	P0CX44;P0CX43	P0CX44;P0CX43	60S ribosomal protein L1-B;60S ribosomal protein L1-A	RPL1B;RPL1A	RL1B_YEAST 60S ribosomal protein L1-B OS=Saccharomyces cerevisiae (strain ATCC 204508 / S288c) OX=559292 GN=RPL1B PE=1 SV=1;RL1A_YEAST 60S ribosomal protein L1-A OS=Saccharomyces cerevisiae (strain ATCC 204508 / S288c) OX=559292 GN=RPL1A PE=1 SV=1	AGKFPTPVSHNDDLYGK;AGKFPTPVSHNDDLYGKVTDVR;EHVKELLK;FPTPVSHNDDLYGK;FPTPVSHNDDLYGKVTDVR;KYNAFIASEVLIK;NFLETVELQVGLK;NWQNVGSLVVK;SCGVDAMSVDDLKK;YNAFIASEVLIK	8	8	0	0	1	8	8	0	0	1	36.9	35	0	0	6	5	8	0	0	0	+	7.06993	8.24697	0	32.262	42	24.485	4.17998	6.62217	22.9396	22.9257	22.9564	22.9238	22.3544	22.927	17.0757	17.2722	16.3681	15.9582	15.6292	16.7513
Color [DarkGray]	1	4	P15565	P15565	tRNA (guanine(26)-N(2))-dimethyltransferase, mitochondrial	TRM1	TRM1_YEAST tRNA (guanine(26)-N(2))-dimethyltransferase, mitochondrial OS=Saccharomyces cerevisiae (strain ATCC 204508 / S288c) OX=559292 GN=TRM1 PE=1 SV=1	AEILFPKK;ANFTAYGAPR;AWDNLYGEECGQK;EAVGNSNRNEPYINILEALSATGLR;EFIEEVLR;ETVFYNPIQQFNR;INIEDFNIVK;INIEDFNIVKEGK;KETVFYNPIQQFNR;LSFAPNEQSGNIEK;NELSDSPFYFSPNHIASVIK;NEPYINILEALSATGLR;NVEYNSVENIVKPNLDDANVLMYR;TNAPWDAIWYVMQK;VVAGLGSLGFECSLTHAQPSSLK;YSVAQGPPVDTK	4	13	0	0	1	4	13	0	0	1	11.6	28.8	0	0	4	0	14	0	0	1	+	6.27333	8.06919	0	35.575	46	64.052	3.218	6.52918	17.1137	15.3158	16.9874	22.6887	22.9635	22.7265	16.3447	16.7494	16.2064	17.5587	15.8377	15.3948
Color [DarkGray]	1	4	P26754	P26754	Replication factor A protein 2	RFA2	RFA2_YEAST Replication factor A protein 2 OS=Saccharomyces cerevisiae (strain ATCC 204508 / S288c) OX=559292 GN=RFA2 PE=1 SV=1	ATYQPYNEYSSVTGGGFENSESRPGSGESETNTR;CHSIASGMMK;DANSFAVPIPLISQSLNLDETTVR;GYGSQVAQQFEIGGYVK;KWSEDANDLAAGNDDSSGK;KWSEDANDLAAGNDDSSGKGYGSQVAQQFEIGGYVK;NCCTTLTDQGFIYPTFDDNNFFAL;NIQYAVIKPIDSFNEVLTHHLEVIK;NITDHTANIFLTIEDGTGQIEVR;QCEGKDANSFAVPIPLISQSLNLDETTVR;QDIQDGPFVSHNQELHHVCFVGVVR;QPLESASNNNGQSLFVK;VNTLTPVTIK;WSEDANDLAAGNDDSSGK;WSEDANDLAAGNDDSSGKGYGSQVAQQFEIGGYVK	0	12	1	0	0	0	12	1	0	0	0	70	8.8	0	0	0	13	0	0	0	+	6.71026	8.16152	0	85.118	48	29.936	3.28441	6.52199	17.8178	16.83	16.1566	23.0365	23.4579	23.1998	17.9388	17.2106	16.9288	17.7392	15.5742	16.8148
Color [DarkGray]	1	4	Q02326	Q02326	60S ribosomal protein L6-A	RPL6A	RL6A_YEAST 60S ribosomal protein L6-A OS=Saccharomyces cerevisiae (strain ATCC 204508 / S288c) OX=559292 GN=RPL6A PE=1 SV=2	ASLVPGTVLILLAGR;EANLFPEQQNK;FNVEYFAK;HLEDNTLLISGPFK;KEANLFPEQQNK;VEDQKVVDK;VSVEGVNVEK;VSVEGVNVEKFNVEYFAK;WYPSEDVAALKK;YVIATSTK	8	8	1	1	0	3	3	0	0	0	44.3	44.9	5.1	4.5	0	5	7	0	0	0	+	7.29524	8.35328	0	23.334	38	19.961	1.60478	6.24571	24.0204	22.8421	23.728	24.0422	23.443	23.1964	21.1366	21.2168	21.2041	15.5958	15.5032	20.8455
Color [DarkGray]	1	4	P10664;P49626	P10664;P49626	60S ribosomal protein L4-A;60S ribosomal protein L4-B	RPL4A;RPL4B	RL4A_YEAST 60S ribosomal protein L4-A OS=Saccharomyces cerevisiae (strain ATCC 204508 / S288c) OX=559292 GN=RPL4A PE=1 SV=4;RL4B_YEAST 60S ribosomal protein L4-B OS=Saccharomyces cerevisiae (strain ATCC 204508 / S288c) OX=559292 GN=RPL4B PE=1 SV=2	AGHQTSAESWGTGR;AVGAHSDLLK;IINSSEIQSAIRPAGQATQK;IPEIPLVVSTDLESIQK;LDQVWGSETVASSK;NVPGVETANVASLNLLQLAPGAHLGR;RGPLVVYAEDNGIVK;SRPQVTVHSLTGEATANALPLPAVFSAPIRPDIVHTVFTSVNK;TGTKPAAVFTETLKHD;TKEAVAALK;VEKIPEIPLVVSTDLESIQK;VGYTLPSHIISTSDVTR	7	9	2	0	2	7	9	2	0	2	32	39.2	11.9	0	11.9	7	13	0	0	3	+	7.03495	8.76024	0	157.03	71	39.092	4.1405	6.21707	23.1861	23.5796	23.3506	24.3873	24.7099	24.5418	16.3194	16.7504	16.7519	18.7233	17.6176	18.6469
Color [DarkGray]	1	4	P25847	P25847	DNA mismatch repair protein MSH2	MSH2	MSH2_YEAST DNA mismatch repair protein MSH2 OS=Saccharomyces cerevisiae (strain ATCC 204508 / S288c) OX=559292 GN=MSH2 PE=1 SV=2	AIANEPEKENDNYLK;ECLVQDLTSNSNSNAEMQK;EQKHDDEDITLLYK;EYDKQQSALVR;FSDVSEER;GDFLIITGPNMGGK;GVSTFMVEILETASILK;HDDEDITLLYK;HDLVDYLIDQIELR;LLGDDLALSLPQK;LSLQEVNEGNIR;LVDKGDYYTVIGSDAIFVADSVYHTQSVLK;NMHVVAHIEK;QPLTNIDEINKR;SIANETNILQK;SSTRPELK;VEFNEELGK;YIELSTVK	1	16	1	0	0	1	16	1	0	0	0.8	21.4	0.8	0	0	0	15	0	0	0	+	6.22006	8.12225	0	42.833	51	108.88	3.52337	6.18187	16.6467	16.3352	16.8335	22.7898	22.8587	22.8846	16.7032	15.9106	16.6893	15.8934	17.6665	16.4276
Color [DarkGray]	1	4	P0CX30;P0CX29	P0CX30;P0CX29	40S ribosomal protein S23-B;40S ribosomal protein S23-A	RPS23B;RPS23A	RS23B_YEAST 40S ribosomal protein S23-B OS=Saccharomyces cerevisiae (strain ATCC 204508 / S288c) OX=559292 GN=RPS23B PE=1 SV=1;RS23A_YEAST 40S ribosomal protein S23-A OS=Saccharomyces cerevisiae (strain ATCC 204508 / S288c) OX=559292 GN=RPS23A PE=1 SV=1	SSPFGGSSHAK;VSGVSLLALWK;VTAFVPNDGCLNFVDENDEVLLAGFGR	1	3	0	0	0	1	3	0	0	0	7.6	33.8	0	0	0	0	5	0	0	0	+	6.85014	7.69524	0	8.4659	17	16.038	4.9648	6.09224	22.2117	22.0403	22.0484	23.1222	23.2308	23.0458	16.2671	16.1777	17.8211	16.865	16.7842	17.4729
Color [DarkGray]	1	4	P0CX50;P0CX49	P0CX50;P0CX49	60S ribosomal protein L18-B;60S ribosomal protein L18-A	RPL18B;RPL18A	RL18B_YEAST 60S ribosomal protein L18-B OS=Saccharomyces cerevisiae (strain ATCC 204508 / S288c) OX=559292 GN=RPL18B PE=1 SV=1;RL18A_YEAST 60S ribosomal protein L18-A OS=Saccharomyces cerevisiae (strain ATCC 204508 / S288c) OX=559292 GN=RPL18A PE=1 SV=1	AGGECITLDQLAVR;ALKQEGAANK;GQNTLILR;HFGMGPHK	2	2	0	1	2	2	2	0	1	2	12.9	12.9	0	7.5	12.9	2	2	0	0	0	+	6.96025	8.00165	0	16.482	13	20.563	2.98448	6.03682	23.021	22.2928	23.0876	23.6766	23.3014	23.7277	17.2395	16.2975	16.2948	18.3272	16.1472	18.1209
Color [DarkGray]	1	4	P05737;Q12213	P05737;Q12213	60S ribosomal protein L7-A;60S ribosomal protein L7-B	RPL7A;RPL7B	RL7A_YEAST 60S ribosomal protein L7-A OS=Saccharomyces cerevisiae (strain ATCC 204508 / S288c) OX=559292 GN=RPL7A PE=1 SV=3;RL7B_YEAST 60S ribosomal protein L7-B OS=Saccharomyces cerevisiae (strain ATCC 204508 / S288c) OX=559292 GN=RPL7B PE=1 SV=3	AAGSYYVEAQHK;ATLELLK;HFIQGGSFGNREEFINK;ILTPESQLKK;LIEPYVAYGYPSYSTIR;LSNPSGGWGVPR;NAAYQKEYETAER;QANNFLWPFK;QRVPLSDNAIIEANLGK;TAEQVAAER;VPLSDNAIIEANLGK;YGILSIDDLIHEIITVGPHFK	11	12	0	0	2	11	12	0	0	2	50.8	59.4	0	0	13.9	10	10	0	0	0	+	7.24849	8.48021	0	44.53	65	27.638	2.89393	6.01751	23.3023	23.3905	23.4143	23.4974	23.3348	23.4179	15.6414	16.5419	16.275	18.3717	15.9386	17.8873
Color [DarkGray]	1	4	P40212	P40212	60S ribosomal protein L13-B	RPL13B	RL13B_YEAST 60S ribosomal protein L13-B OS=Saccharomyces cerevisiae (strain ATCC 204508 / S288c) OX=559292 GN=RPL13B PE=1 SV=1	AAGLTAAYAR;APEAEQVLSAAATFPIAQPATDVEAR;AVQDNGESAFR;DGKAPEAEQVLSAAATFPIAQPATDVEAR;NQEIFDANVQR;TIGIAVDHR;TIGIAVDHRR;VKVHFDQAGKK	7	8	0	0	2	1	1	0	0	0	40.7	41.2	0	0	11.1	5	7	0	0	0	+	7.17863	8.38072	0	23.224	43	22.525	3.44085	5.62164	22.6997	22.8294	22.8795	23.5571	23.4368	23.6374	16.8994	16.2732	17.162	18.9188	17.4574	17.3902
Color [DarkGray]	1	4	P24000;P04449	P24000;P04449	60S ribosomal protein L24-B;60S ribosomal protein L24-A	RPL24B;RPL24A	RL24B_YEAST 60S ribosomal protein L24-B OS=Saccharomyces cerevisiae (strain ATCC 204508 / S288c) OX=559292 GN=RPL24B PE=1 SV=1;RL24A_YEAST 60S ribosomal protein L24-A OS=Saccharomyces cerevisiae (strain ATCC 204508 / S288c) OX=559292 GN=RPL24A PE=1 SV=1	AQRPITGASLDLIK	1	1	0	0	0	1	1	0	0	0	9	9	0	0	0	2	1	0	0	0	+	6.78341	7.48237	0	7.7019	8	17.547	3.85824	5.61844	21.6798	21.9594	21.6452	22.8801	22.4708	22.3688	17.4142	16.6295	17.2952	17.0378	16.2935	17.5331
Color [DarkGray]	1	4	P12695	P12695	Dihydrolipoyllysine-residue acetyltransferase component of pyruvate dehydrogenase complex, mitochondrial	LAT1	ODP2_YEAST Dihydrolipoyllysine-residue acetyltransferase component of pyruvate dehydrogenase complex, mitochondrial OS=Saccharomyces cerevisiae (strain ATCC 204508 / S288c) OX=559292 GN=LAT1 PE=1 SV=1	GLSQISNEIKELVK	1	1	1	0	0	1	1	1	0	0	2.9	2.9	2.9	0	0	0	0	1	0	0	+	6.06871	7.43045	0.003413	1.9011	6	51.817	5.33152	5.30774	21.3426	21.0733	20.938	21.5275	21.1656	21.6721	16.8431	16.144	16.1399	16.2339	16.0721	16.1359
Color [DarkGray]	1	4	P26755	P26755	Replication factor A protein 3	RFA3	RFA3_YEAST Replication factor A protein 3 OS=Saccharomyces cerevisiae (strain ATCC 204508 / S288c) OX=559292 GN=RFA3 PE=1 SV=1	ASETPRVDPTEISNVNAPVFR;NNDDGELGFLILDAVLCK;TFEIDSWYEFVCR;VDPTEISNVNAPVFR	0	4	0	0	0	0	4	0	0	0	0	42.6	0	0	0	0	3	0	0	0	+	6.62675	7.47185	0	11.791	8	13.816	3.58375	5.26022	16.7599	16.5586	17.3039	21.6994	21.9701	21.6044	16.4012	17.1069	15.9043	15.6661	16.8452	16.9821
Color [DarkGray]	1	4	P38687	P38687	Signal recognition particle subunit SRP68	SRP68	SRP68_YEAST Signal recognition particle subunit SRP68 OS=Saccharomyces cerevisiae (strain ATCC 204508 / S288c) OX=559292 GN=SRP68 PE=1 SV=1	AEQFLETDSDFAK;DSVTETESISQTPISNEQTEGEPK;IENGGNSVITLAEYEKR;ISNNLALVFAALEHLK;LSEIESLDEILLPANLLSLNSVR;QYAGNLITTPEINNFIVER;VQSDENKDDELVK;YGEINSEDYDNKTK	0	5	1	0	2	0	5	1	0	2	0	15	2.7	0	6	0	6	0	0	1	+	6.05934	7.71928	0	148.1	26	69.005	3.66235	5.25899	15.7868	18.2009	18.2285	21.8336	22.409	22.4977	16.8849	16.8202	16.3666	17.6349	16.9206	16.4078
Color [DarkGray]	1	4	P06778	P06778	DNA repair and recombination protein RAD52	RAD52	RAD52_YEAST DNA repair and recombination protein RAD52 OS=Saccharomyces cerevisiae (strain ATCC 204508 / S288c) OX=559292 GN=RAD52 PE=1 SV=2	FDPPDFDENNLFRPTDEISESSR;IAYIEGWR;KLGPEYISK;KPVFGNHSEDIQTK;NNDKELGPHMLEGAGNQVPR;QSPTASSNPEAEQITFVTAK;SAVTDALKR;SVVIDFLDER;SVVIDFLDERQGK;TNTLHENQEQQQYPNK;TNTLHENQEQQQYPNKR;VINLANQIFGYNGWSTEVK;VKFDPPDFDENNLFRPTDEISESSR;VTLTSGTYR;VTLTSGTYREDIGYGTVENER;VTNTNPDSTK;VTNTNPDSTKNLVK;YIGEESIFDPK	0	18	0	0	1	0	18	0	0	1	0	42.5	0	0	1.9	0	16	0	0	0	+	6.98073	8.76599	0	207.64	48	52.403	1.57746	5.22961	16.2278	16.2593	15.6294	22.0957	22.0006	26.6096	16.914	18.336	18.4935	18.4337	18.1656	18.4178
Color [DarkGray]	1	4	P0CX83;P0CX82	P0CX83;P0CX82	60S ribosomal protein L19-B;60S ribosomal protein L19-A	RPL19B;RPL19A	RL19B_YEAST 60S ribosomal protein L19-B OS=Saccharomyces cerevisiae (strain ATCC 204508 / S288c) OX=559292 GN=RPL19B PE=1 SV=1;RL19A_YEAST 60S ribosomal protein L19-A OS=Saccharomyces cerevisiae (strain ATCC 204508 / S288c) OX=559292 GN=RPL19A PE=1 SV=1	ALNEEAEAR;ALVEHIIQAK;HLYHVLYK;IDKHLYHVLYK;KAVTVHSK;KVWLDPNETSEIAQANSR;LAASVVGVGK;LAASVVGVGKR;LPSQVVWIR;VWLDPNETSEIAQANSR	6	9	0	0	1	6	9	0	0	1	25.9	35.4	0	0	4.8	5	9	0	0	0	+	7.14656	8.11949	0	100.71	50	21.704	2.65077	5.1001	21.5987	21.7733	22.109	23.0741	22.9781	20.9147	16.4272	16.6453	16.6458	16.9489	17.1046	17.613
Color [DarkGray]	1	4	P32606	P32606	Putative mitochondrial translation system component PET127	PET127	PT127_YEAST Putative mitochondrial translation system component PET127 OS=Saccharomyces cerevisiae (strain ATCC 204508 / S288c) OX=559292 GN=PET127 PE=1 SV=2	DIPSTQTPNFFHASDVSTWEVNSTFTDINDK;EIVLSVLGHYLEDFLTEK;FFNEPVLNIVALPLSPEYEDK;HVEQLLNSSNTK;IACLVANR;KNDILDTESR;MSMNLFSNILK;MYNFDPAVENINPEYLEK;NCNYSESAYFPSAVILR;SDLHSALEMVDEIYDTNSTVEDIGNKEK;SENYHYSSIDEFIVR;SQLDAYDPNLPGTGVFDLK;YDLSHVESNNNQTGYEIDKVYGEFESLER	0	10	0	0	0	0	10	0	0	0	0	23.8	0	0	0	0	12	0	0	0	+	6.03906	7.80481	0	120.44	30	93.406	4.11245	5.00717	17.019	17.9251	17.1551	22.0747	22.1986	21.9439	15.6855	16.6749	16.7238	16.8142	16.7329	17.6485
Color [DarkGray]	1	4	P13393	P13393	TATA-box-binding protein	SPT15	TBP_YEAST TATA-box-binding protein OS=Saccharomyces cerevisiae (strain ATCC 204508 / S288c) OX=559292 GN=SPT15 PE=1 SV=3	DGTKPATTFQSEEDIKR	0	1	0	0	0	0	1	0	0	0	0	7.1	0	0	0	0	1	0	0	0	+	5.6654	6.8415	0	3.4666	3	27.003	4.95275	4.89315	17.6978	16.0668	16.9128	20.8294	20.7755	21.3288	15.9086	17.9905	18.0034	16.1595	16.081	16.0138
Color [DarkGray]	1	4	P05755	P05755	40S ribosomal protein S9-B	RPS9B	RS9B_YEAST 40S ribosomal protein S9-B OS=Saccharomyces cerevisiae (strain ATCC 204508 / S288c) OX=559292 GN=RPS9B PE=1 SV=4	HIDFAPTSPFGGARPGR;ISFQLSK;KAEASGEAAEEAEDEE;LDSEKHIDFAPTSPFGGARPGR;LFEGNALIR;QIVNIPSFMVR;VGVLSEDKK	6	5	0	0	0	1	1	0	0	0	34.4	26.7	0	0	0	4	4	0	0	0	+	7.08952	8.16385	0	85.127	24	22.298	1.63333	4.80022	23.8615	24.0109	23.963	22.2868	22.219	22.4048	16.0715	16.9408	18.2339	15.6352	20.1051	16.7697
Color [DarkGray]	1	4	P07271	P07271	ATP-dependent DNA helicase PIF1	PIF1	PIF1_YEAST ATP-dependent DNA helicase PIF1 OS=Saccharomyces cerevisiae (strain ATCC 204508 / S288c) OX=559292 GN=PIF1 PE=1 SV=2	ESNSNQVHSLVSDEPR;ESSFDELQNNSISQER;KLDYAPGPK;LGNIDDETEREFK;MVLVEPEDWAIEDENEKPLVSR;SDIGEPVSPLDSSVFDFMK;SDIGEPVSPLDSSVFDFMKR	0	7	0	0	0	0	7	0	0	0	0	11.2	0	0	0	0	4	0	0	0	+	5.58397	7.48751	0	12.699	15	97.681	2.76792	4.74117	18.0084	17.983	16.5259	20.9606	21.6466	21.9342	16.1839	16.4102	18.7292	16.2911	17.8969	16.1299
Color [DarkGray]	1	4	Q08235	Q08235	Ribosome biogenesis protein BRX1	BRX1	BRX1_YEAST Ribosome biogenesis protein BRX1 OS=Saccharomyces cerevisiae (strain ATCC 204508 / S288c) OX=559292 GN=BRX1 PE=1 SV=2	NKEEYEDGEEDISLVEIGPR	1	1	0	0	0	1	1	0	0	0	6.9	6.9	0	0	0	1	1	0	0	0	+	5.77308	7.00355	0.0019342	2.6994	6	33.531	3.43412	4.737	20.6105	20.6316	20.6547	20.3675	21.1123	20.4764	18.3112	17.0818	17.5134	15.6171	16.6234	15.5047
Color [DarkGray]	1	4	P25336	P25336	DNA mismatch repair protein MSH3	MSH3	MSH3_YEAST DNA mismatch repair protein MSH3 OS=Saccharomyces cerevisiae (strain ATCC 204508 / S288c) OX=559292 GN=MSH3 PE=1 SV=2	AFSISEELRK;ESINEDALK;GLTYNSYGMNVAK;IHMLLDPNSLQSLDIFTHDGGK;ILGDTNSIWALSR;IQLSPSLIR;RSDENVEAEDDEEEGEEDFVK;RSDENVEAEDDEEEGEEDFVKK;SQLKEELAEIRK;TSGTSTTFNDIDFAK;YLQPIEVLVNTDDLPLHVAK	0	7	0	0	0	0	7	0	0	0	0	10.1	0	0	0	0	6	0	0	0	+	5.34149	7.39679	0	50.785	18	116.53	4.7799	4.67535	16.1302	16.4033	16.3881	21.2693	21.2956	21.2478	16.8615	18.1066	17.6803	16.3945	16.4154	16.9768
Color [DarkGray]	1	4	P05739	P05739	60S ribosomal protein L6-B	RPL6B	RL6B_YEAST 60S ribosomal protein L6-B OS=Saccharomyces cerevisiae (strain ATCC 204508 / S288c) OX=559292 GN=RPL6B PE=1 SV=4	ASLVPGTVLILLAGR;FNVEYFAK;HLEDNTLLVTGPFK;VEDQKVVDK;VSVEGVNVEK;VSVEGVNVEKFNVEYFAK;YVIATSTK	1	1	0	0	0	1	1	0	0	0	31.2	31.8	5.1	4.5	0	2	1	0	0	0	+	5.83113	6.93882	0	7.9405	8	19.986	4.60787	4.52855	20.2558	19.7856	20.4061	20.4791	20.3132	20.4985	16.3202	18.2189	15.8792	16.2179	15.543	15.9443
Color [DarkGray]	1	4	P36517	P36517	54S ribosomal protein L4, mitochondrial	MRPL4	RM04_YEAST 54S ribosomal protein L4, mitochondrial OS=Saccharomyces cerevisiae (strain ATCC 204508 / S288c) OX=559292 GN=MRPL4 PE=1 SV=2	NIVGSTHDEFSELSNSIR	0	1	0	0	0	0	1	0	0	0	0	5.6	0	0	0	0	0	0	0	0	+	5.54513	6.77558	0.0034843	1.9829	4	36.964	3.3271	4.467	17.59	20.102	19.9553	20.2246	19.809	20.0188	15.0576	17.0878	17.5396	16.3695	15.1518	15.13
Color [DarkGray]	1	4	Q03144	Q03144	Pyridoxal 5-phosphate synthase subunit SNO1	SNO1	SNO1_YEAST Pyridoxal 5-phosphate synthase subunit SNO1 OS=Saccharomyces cerevisiae (strain ATCC 204508 / S288c) OX=559292 GN=SNO1 PE=1 SV=1	CDFSNFIPGCDNFPATFIR;CLAENDYGIK;DVVVAATQNHNILVTSFHPELADSDTR;TGLYPCLYEFVHNPEK;TPEDLAQCDALIIPGGESTSMSLIAQR;VIGVLALQGAFLEHTNHLK	0	2	6	0	0	0	2	6	0	0	0	12.9	52.7	0	0	0	0	8	0	0	+	6.17403	7.6035	0	16.04	20	24.906	4.24252	4.44671	16.3283	19.5677	16.6074	19.1809	19.3419	19.9851	16.1616	16.4036	15.875	15.1279	15.0311	15.0088
Color [DarkGray]	1	4	P36049	P36049	rRNA-processing protein EBP2	EBP2	EBP2_YEAST rRNA-processing protein EBP2 OS=Saccharomyces cerevisiae (strain ATCC 204508 / S288c) OX=559292 GN=EBP2 PE=1 SV=1	EVAADTEEYQSQALSK;KEEPTIVTASNLK;MQEQDATEAQK	1	2	2	0	0	1	2	2	0	0	3	6.8	5.6	0	0	0	1	2	0	0	+	6.64413	7.92289	0	3.3598	3	49.734	0.958821	4.32196	22.5137	22.6946	17.2626	23.181	16.9095	23.1321	17.0169	17.2389	17.2449	17.4192	16.2841	16.5535
Color [DarkGray]	1	4	P0C2H7;P0C2H6	P0C2H7;P0C2H6	60S ribosomal protein L27-B;60S ribosomal protein L27-A	RPL27B;RPL27A	RL27B_YEAST 60S ribosomal protein L27-B OS=Saccharomyces cerevisiae (strain ATCC 204508 / S288c) OX=559292 GN=RPL27B PE=1 SV=1;RL27A_YEAST 60S ribosomal protein L27-A OS=Saccharomyces cerevisiae (strain ATCC 204508 / S288c) OX=559292 GN=RPL27A PE=1 SV=1	SHPFGHALVAGIER;SVVSTETFEQPSQR;SVVSTETFEQPSQREEAK;SVVSTETFEQPSQREEAKK;VVIVKPHDEGSK;VVNYNHLLPTR;YTLDVEAFK	6	6	0	2	2	6	6	0	2	2	37.5	37.5	0	16.9	16.9	2	7	0	1	1	+	6.98852	8.04867	0	234.41	38	15.505	2.31376	4.29774	20.9444	20.6411	23.138	23.1085	20.7366	20.9542	16.5871	17.8099	16.4085	17.1462	17.4336	17.3263
Color [DarkGray]	1	4	P27476	P27476	Nuclear localization sequence-binding protein	NSR1	NSR1_YEAST Nuclear localization sequence-binding protein OS=Saccharomyces cerevisiae (strain ATCC 204508 / S288c) OX=559292 GN=NSR1 PE=1 SV=1	EIDGRPINCDMSTSKPAGNNDR;GFGYVQFSNMEDAKK;IPTHPETEQPK;KEFEHIGGVIGAR;NEETEEPATIFVGR;SEDAEEEEDEESSNKK	3	4	1	0	0	3	4	1	0	0	9.7	15.5	2.7	0	0	3	3	0	0	0	+	6.20504	7.79376	0	38.021	25	44.535	2.32785	4.27352	21.9706	22.5945	22.5576	20.9341	21.368	21.5219	15.9558	16.2527	17.1116	16.3148	16.229	18.4596
Color [DarkGray]	1	4	P38688	P38688	Signal recognition particle subunit SRP72	SRP72	SRP72_YEAST Signal recognition particle subunit SRP72 OS=Saccharomyces cerevisiae (strain ATCC 204508 / S288c) OX=559292 GN=SRP72 PE=1 SV=2	DIDIDKLIQLGVKPLESSAK;IGELFLNESWK;IYQHLASHNEKDQDSQIELSCNER;LNTFNLQTFTHEQWSNIQR;LVDNVTLESYK;VVSSDSLDIAQGIDLVR;YNTNFNLLLR	0	6	0	0	0	0	6	0	0	0	0	15.9	0	0	0	0	8	0	0	0	+	5.39658	7.37731	0	15.847	20	73.54	6.04894	4.20937	17.0281	16.7286	16.7303	20.9001	20.975	20.973	17.3433	17.3929	17.2161	16.8559	16.775	16.5891
Color [DarkGray]	1	4	P32495	P32495	H/ACA ribonucleoprotein complex subunit 2	NHP2	NHP2_YEAST H/ACA ribonucleoprotein complex subunit NHP2 OS=Saccharomyces cerevisiae (strain ATCC 204508 / S288c) OX=559292 GN=NHP2 PE=1 SV=2	GLVVIAGDISPADVISHIPVLCEDHSVPYIFIPSK;MPAVLPFAKPLASK;NKEEEYKESFNEVVK;QDLGAAGATK;RPTSVVFIVPGSNK;TVDNYEAR	3	6	0	0	2	3	6	0	0	2	27.6	61.5	0	0	18.6	3	9	0	0	0	+	7.33187	8.32858	0	97.525	33	17.122	3.6088	4.09451	22.1363	21.9443	21.815	23.7215	23.3701	23.7438	16.9916	16.8097	16.2765	19.6833	19.9486	18.9199
Color [DarkGray]	1	4	P33442	P33442	40S ribosomal protein S1-A	RPS1A	RS3A1_YEAST 40S ribosomal protein S1-A OS=Saccharomyces cerevisiae (strain ATCC 204508 / S288c) OX=559292 GN=RPS1A PE=1 SV=2	APSTFENR;DIFPLQNIHVR;EVQGSTLAQLTSK;FDVGALMALHGEGSGEEK;HSYAQSSHIR;LIPEVINKEIENATK;LRVDEVQGK;NLLTNFHGMDFTTDKLR;VVEVCLADLQGSEDHSFR	6	8	0	1	2	1	1	0	0	0	29.8	40	0	3.9	10.6	3	7	0	0	1	+	6.43114	7.99354	0	25.766	38	28.743	4.35649	4.08209	20.8241	21.8432	22.7375	22.5679	22.1631	22.5131	18.446	15.3782	18.4278	17.9983	18.5675	18.4319
Color [DarkGray]	1	4	P35187	P35187	ATP-dependent helicase SGS1	SGS1	SGS1_YEAST ATP-dependent helicase SGS1 OS=Saccharomyces cerevisiae (strain ATCC 204508 / S288c) OX=559292 GN=SGS1 PE=1 SV=1	DIRPQLSNMSIR;EEDELTMEAEDDAHSSYMTTR;ETATLQEDKDFVFQAIQK;IVQANHDTLEEHGIGK;LVESIQNER;NTIFEICDAVK;SLCYQLPAVVK;SQVSSQDDNIISSILPSPLEYNTSSR;STTIGGNVAANPPR;SYTYGGSTMGSSHPITLK;TNLYYEVNKK;VLQEYSIMNNSGFASSYVK	1	9	0	0	0	1	9	0	0	0	1.5	8.8	0	0	0	0	6	0	0	0	+	5.29695	7.41881	0	14.949	21	163.84	3.03792	4.02621	17.2565	16.1134	18.0764	20.9219	21.0223	20.8466	16.5071	15.8627	15.856	16.6613	17.7836	16.2673
Color [DarkGray]	1	4	P36534	P36534	54S ribosomal protein L40, mitochondrial	MRPL40	RM40_YEAST 54S ribosomal protein L40, mitochondrial OS=Saccharomyces cerevisiae (strain ATCC 204508 / S288c) OX=559292 GN=MRPL40 PE=1 SV=2	SGSYQHLSNVGSR;TNSFILDENGPTK	1	2	0	0	0	1	2	0	0	0	4.4	8.8	0	0	0	1	2	0	0	0	+	5.63646	6.81255	0	6.5532	7	33.751	2.96066	4.01297	19.702	20.0516	19.9641	20.1749	19.8455	20.4352	17.29	16.6771	17.3745	15.2476	16.5922	16.5769
Color [DarkGray]	1	4	Q12114	Q12114	Chitin biosynthesis protein CHS5	CHS5	CHS5_YEAST Chitin biosynthesis protein CHS5 OS=Saccharomyces cerevisiae (strain ATCC 204508 / S288c) OX=559292 GN=CHS5 PE=1 SV=1	GFYLDADQSILK;GSEAEDDINNVSK;HVAIDTTHFVCNDLDNEESNEELIR;ISGLSVDTPYEFQLK	3	3	0	0	0	3	3	0	0	0	6	7.7	0	0	0	3	3	0	0	0	+	5.69887	7.30724	0	15.695	20	73.638	5.22387	3.9608	21.0521	20.8178	20.8708	20.2884	20.7001	20.4189	15.9373	17.505	16.3807	16.5693	16.4858	16.4699
Color [DarkGray]	1	4	Q02685	Q02685	RecQ-mediated genome instability protein 1	RMI1	RMI1_YEAST RecQ-mediated genome instability protein 1 OS=Saccharomyces cerevisiae (strain ATCC 204508 / S288c) OX=559292 GN=RMI1 PE=1 SV=1	DSQVIFLGGINR;FCDYLESK;SFSSILSQDITDDITPPAYSATLGSR	0	3	0	0	0	0	3	0	0	0	0	19.1	0	0	0	0	4	0	0	0	+	5.68871	6.7679	0	7.509	7	26.859	6.4006	3.88273	16.9545	16.1698	17.2013	19.6478	19.6574	19.81	16.6424	16.9244	17.3298	15.8885	15.7987	15.7798
Color [DarkGray]	1	4	P26784	P26784	60S ribosomal protein L16-A	RPL16A	RL16A_YEAST 60S ribosomal protein L16-A OS=Saccharomyces cerevisiae (strain ATCC 204508 / S288c) OX=559292 GN=RPL16A PE=1 SV=3	AEELNISGEFFR;LSTSVGWKYEDVVAK;SVEPVVVIDGKGHLVGR;VASANATAAESDVAK;VVVPQALR	3	2	0	0	0	3	2	0	0	0	33.7	26.1	0	0	0	1	2	0	0	0	+	6.07886	7.23325	0	7.3726	11	22.201	4.36709	3.84612	21.1123	20.8164	20.8405	20.5102	20.5739	20.7861	16.6934	16.9378	15.9879	16.9254	16.9904	16.4161
Color [DarkGray]	1	4	P28007	P28007	H/ACA ribonucleoprotein complex subunit 1	GAR1	GAR1_YEAST H/ACA ribonucleoprotein complex subunit GAR1 OS=Saccharomyces cerevisiae (strain ATCC 204508 / S288c) OX=559292 GN=GAR1 PE=1 SV=1	CGDGVQATSFK;EGDKFYIAADK;EGDKFYIAADKLLPIER;FYIAADKLLPIER;IPYFNAPIYLENK;SFQQGPPDTVLEMGAFLHPCEGDIVCR;TQVGKVDEILGPLNEVFFTIK;VDEILGPLNEVFFTIK	7	8	0	0	4	7	8	0	0	4	43.4	43.4	0	0	29.8	3	11	0	0	0	+	7.01708	8.12652	0	35.542	47	21.48	4.62698	3.84413	21.499	21.4818	21.4771	23.1509	23.0433	23.1521	16.7172	17.0189	16.941	19.2839	18.9743	19.5557
Color [DarkGray]	1	4	P40562	P40562	ATP-dependent DNA helicase MPH1	MPH1	MPH1_YEAST ATP-dependent DNA helicase MPH1 OS=Saccharomyces cerevisiae (strain ATCC 204508 / S288c) OX=559292 GN=MPH1 PE=1 SV=1	AMEDYSTLQALISK;DLHDNVLPGQK;DVSFGPTHHELDYDALSFYVYPTNYEVR	0	3	0	0	0	0	3	0	0	0	0	5.3	0	0	0	0	2	0	0	0	+	5.18395	6.90033	0	3.635	5	114.06	3.02827	3.80204	16.6593	17.1612	15.8183	20.1596	20.2931	20.297	16.6389	16.4926	16.2817	16.926	15.586	16.8315
Color [DarkGray]	1	4	P33322	P33322	H/ACA ribonucleoprotein complex subunit 4	CBF5	CBF5_YEAST H/ACA ribonucleoprotein complex subunit CBF5 OS=Saccharomyces cerevisiae (strain ATCC 204508 / S288c) OX=559292 GN=CBF5 PE=1 SV=1	DSAVNAVCYGAK;EYVPLDNAEQSTSSSQETK;EYVPLDNAEQSTSSSQETKETEEEPK;EYVPLDNAEQSTSSSQETKETEEEPKK;GEAIAVAIAQMSTVDLASCDHGVVASVK;IVVKDSAVNAVCYGAK;LHDALKDEKDLGR;NLGVFWASCEAGTYMR;SGALSENDNMVTLHDVMDAQWVYDNTR;SGALSENDNMVTLHDVMDAQWVYDNTRDESYLR;SGHYTPIPAGSSPLKR;SIIQPLETLLVGYK;SIIQPLETLLVGYKR;SKEDFVIKPEAAGASTDTSEWPLLLK;SLENLTGALFQRPPLISAVK;SQQGAGKEYVCIVR;SYISSGVINLDKPSNPSSHEVVAWIK;SYISSGVINLDKPSNPSSHEVVAWIKR;TGHSGT…	15	23	0	0	8	15	23	0	0	8	38.7	64.6	0	0	27.1	9	38	0	0	7	+	7.01515	8.9858	0	277.44	179	54.704	3.80915	3.73322	22.6356	22.9432	22.9096	24.6406	24.6315	24.5057	16.0486	16.8271	16.8293	21.0976	20.3304	21.1503
Color [DarkGray]	1	4	Q12223	Q12223	DNA repair protein RAD59	RAD59	RAD59_YEAST DNA repair protein RAD59 OS=Saccharomyces cerevisiae (strain ATCC 204508 / S288c) OX=559292 GN=RAD59 PE=1 SV=1	ECQPFTAVNNGENTNTSEVK;ITNNYYVDGLYGSK;VTLKDGTNTQCGGLGR;YTYNIYHNNK	0	4	0	0	0	0	4	0	0	0	0	25.2	0	0	0	0	6	0	0	0	+	5.17298	7.02629	0	6.2538	11	26.63	3.09149	3.72377	17.9056	17.5606	17.2449	20.7934	20.1459	20.4498	17.9015	16.3294	15.9913	17.1419	17.0636	16.0124
Color [DarkGray]	1	4	P16474	P16474	78 kDa glucose-regulated protein homolog	KAR2	BIP_YEAST Endoplasmic reticulum chaperone BiP OS=Saccharomyces cerevisiae (strain ATCC 204508 / S288c) OX=559292 GN=KAR2 PE=1 SV=1	AKFEELNLDLFKK;DAGTIAGLNVLR;DVDDIVLVGGSTR;IEIDSFVDGIDLSETLTR;ITPSYVAFTDDERLIGDAAK;IVNEPTAAAIAYGLDK;KVFTPEEISGMILGK;NKLENYAHSLK;NQVAANPQNTIFDIK;NQVAANPQNTIFDIKR;QIAEDYLGTK;SQIFSTAVDNQPTVMIK;VFTPEEISGMILGK;VTHAVVTVPAYFNDAQR	4	8	9	1	1	4	8	9	1	1	10.6	17.7	18	3.7	4.7	2	6	8	0	0	+	6.11368	8.03113	0	62.071	53	74.467	4.05774	3.7032	18.9175	18.71	19.4695	20.6356	21.3582	21.0863	17.8171	16.767	16.7509	17.3133	17.1676	17.4897
Color [DarkGray]	1	4	P15424	P15424	ATP-dependent RNA helicase MSS116, mitochondrial	MSS116	MS116_YEAST ATP-dependent RNA helicase MSS116, mitochondrial OS=Saccharomyces cerevisiae (strain ATCC 204508 / S288c) OX=559292 GN=MSS116 PE=1 SV=1	AIIFAPTVK;DESGILVCTDVGAR;DLPILEFHGK;ECLFLDTVDKNEPEAHER;EGSSVLFICKDELPFVR;ELEDAKNIVIAK;EVTLDSLLEEGVLDKEIHK;FANSIFAAVEHIK;FANSIFAAVEHIKK;FKKDESGILVCTDVGAR;FTSFLCSILK;IDQSVVISEK;ILPEIASTYGVLLNDPQLK;LIDVLEK;MEFPGLTPVQQK;SEVLEAVTEEPEDISDIVISLISSYR;TIKPILSSEDHDVIAR;TLLFSATLDDKVQK	10	10	0	0	1	10	10	0	0	1	18.5	22.9	0	0	1.8	6	6	0	0	0	+	6.04191	7.86432	0	24.21	43	76.268	1.42203	3.67802	22.2075	21.9461	22.0992	21.0666	21.2047	21.1859	17.1255	16.5656	16.5654	19.777	15.718	16.928
Color [DarkGray]	1	4	P32591	P32591	SWI/SNF complex subunit SWI3	SWI3	SWI3_YEAST SWI/SNF complex subunit SWI3 OS=Saccharomyces cerevisiae (strain ATCC 204508 / S288c) OX=559292 GN=SWI3 PE=1 SV=1	LNFNQNSSK;QMNFLTNELIR;VEPETFEIPQAHEIVIPSYSK	3	2	0	0	0	3	2	0	0	0	5	2.4	0	0	0	1	1	0	0	0	+	5.06621	7.04505	0	3.5369	8	92.925	6.13975	3.6764	20.2749	20.2851	20.2361	20.2151	20.0389	20.0103	15.9106	16.4089	16.6758	16.4562	16.3716	16.4074
Color [DarkGray]	1	4	Q03834	Q03834	DNA mismatch repair protein MSH6	MSH6	MSH6_YEAST DNA mismatch repair protein MSH6 OS=Saccharomyces cerevisiae (strain ATCC 204508 / S288c) OX=559292 GN=MSH6 PE=1 SV=1	AINENIIVPQR;DALLANALFDLK;FNSAPNAIFNEVK;LGANDNIMQGK;LGLLTGANAAGK;LGSGEGVLNYDWNIKR;MSILVDEATR	0	4	0	0	0	0	4	0	0	0	0	4.2	0	0	0	0	4	0	0	0	+	5.27681	7.25288	0	7.473	16	140.08	6.1384	3.66735	18.0021	17.6452	17.1123	20.5899	20.4698	20.4285	17.0644	17.2809	18.4839	16.8368	16.9082	16.7411
Color [DarkGray]	1	4	P39939;P39938	P39939;P39938	40S ribosomal protein S26-B;40S ribosomal protein S26-A	RPS26B;RPS26A	RS26B_YEAST 40S ribosomal protein S26-B OS=Saccharomyces cerevisiae (strain ATCC 204508 / S288c) OX=559292 GN=RPS26B PE=1 SV=1;RS26A_YEAST 40S ribosomal protein S26-A OS=Saccharomyces cerevisiae (strain ATCC 204508 / S288c) OX=559292 GN=RPS26A PE=1 SV=1	DLSEASVYPEYALPK;NIVEAAAVR	2	2	0	0	0	2	2	0	0	0	20.2	20.2	0	0	0	1	1	0	0	0	+	6.81124	7.4133	0	7.8964	7	13.447	3.10742	3.56284	20.9073	20.8689	20.9326	21.417	21.0302	21.4147	15.2226	16.8438	16.2703	17.7512	18.3447	17.0775
Color [DarkGray]	1	4	P26785	P26785	60S ribosomal protein L16-B	RPL16B	RL16B_YEAST 60S ribosomal protein L16-B OS=Saccharomyces cerevisiae (strain ATCC 204508 / S288c) OX=559292 GN=RPL16B PE=1 SV=3	AEALNISGEFFR;KVSSASAAASESDVAK;LSTSVGWKYEDVVAK;QLASFGY;SQPVVVIDAKDHLLGR;VSSASAAASESDVAK;VVVPQALR	7	7	0	0	2	5	5	0	0	2	37.4	37.4	0	0	14.1	4	3	0	0	2	+	6.9693	8.14492	0	61.82	27	22.249	1.63961	3.48098	22.7608	22.0414	22.7132	22.0678	22.5593	22.6035	15.2403	16.6511	17.2163	17.0693	20.2269	19.4914
Color [DarkGray]	1	4	Q12464	Q12464	RuvB-like protein 2	RVB2	RUVB2_YEAST RuvB-like protein 2 OS=Saccharomyces cerevisiae (strain ATCC 204508 / S288c) OX=559292 GN=RVB2 PE=1 SV=1	ALEDEFAPIVMMATNR;AYLLFLDSAR;DVPFTAIAGSEIFSLELSK;TQGFLALFTGDTGEIR;TTDMETIYELGNK;YVQENESQYIDDQGNVQISIAK	3	4	3	1	0	3	4	3	1	0	8.9	14.2	11.5	2.8	0	1	2	3	1	0	+	5.77244	7.24957	0	32.839	18	51.611	3.69795	3.43832	19.2097	19.2309	18.393	20.2023	19.6976	19.9445	17.1163	18.6281	19.5158	16.118	16.8795	16.532
Color [DarkGray]	1	4	P38985	P38985	Signal recognition particle subunit SRP14	SRP14	SRP14_YEAST Signal recognition particle subunit SRP14 OS=Saccharomyces cerevisiae (strain ATCC 204508 / S288c) OX=559292 GN=SRP14 PE=1 SV=1	ASELDQFWQEYSSVFK;VPEFFQTANEK	0	2	0	0	1	0	2	0	0	1	0	18.5	0	0	11	0	3	0	0	1	+	5.87406	6.77715	0	3.4587	8	16.43	3.4605	3.43277	16.0329	17.3035	17.3152	19.8218	20.2452	19.7985	15.6227	17.1018	16.3862	16.002	16.6863	16.8788
Color [DarkGray]	1	4	P0CX46;P0CX45	P0CX46;P0CX45	60S ribosomal protein L2-B;60S ribosomal protein L2-A	RPL2B;RPL2A	RL2B_YEAST 60S ribosomal protein L2-B OS=Saccharomyces cerevisiae (strain ATCC 204508 / S288c) OX=559292 GN=RPL2B PE=1 SV=1;RL2A_YEAST 60S ribosomal protein L2-A OS=Saccharomyces cerevisiae (strain ATCC 204508 / S288c) OX=559292 GN=RPL2A PE=1 SV=1	ASGNYVIIIGHNPDENK;ASLNVGNVLPLGSVPEGTIVSNVEEKPGDR;GAGSIFTSHTR;GVAMNPVDHPHGGGNHQHIGK;KASLNVGNVLPLGSVPEGTIVSNVEEKPGDR;KGAGSIFTSHTR	6	5	1	0	1	6	5	1	0	1	31.9	25.2	4.3	0	12.2	7	2	0	0	0	+	6.19265	7.92184	0	26.513	23	27.408	1.58361	3.41161	23.8965	21.8039	23.0615	21.1991	21.4211	20.9245	16.0674	18.4573	17.6539	18.8833	18.6077	15.8189
Color [DarkGray]	1	4	P40018	P40018	Small nuclear ribonucleoprotein-associated protein B	SMB1	RSMB_YEAST Small nuclear ribonucleoprotein-associated protein B OS=Saccharomyces cerevisiae (strain ATCC 204508 / S288c) OX=559292 GN=SMB1 PE=1 SV=1	GEQILSTVVEDKPLLSK	0	1	0	0	0	0	1	0	0	0	0	8.7	0	0	0	0	1	0	0	0	+	5.46184	6.60798	0.0035971	2.1781	1	22.379	2.72456	3.29927	17.1852	17.4973	19.8854	19.2965	19.8747	19.9854	16.6714	15.8887	17.4407	17.1686	15.8055	16.2845
Color [DarkGray]	1	4	P0CX54;P0CX53	P0CX54;P0CX53	60S ribosomal protein L12-B;60S ribosomal protein L12-A	RPL12B;RPL12A	RL12B_YEAST 60S ribosomal protein L12-B OS=Saccharomyces cerevisiae (strain ATCC 204508 / S288c) OX=559292 GN=RPL12B PE=1 SV=1;RL12A_YEAST 60S ribosomal protein L12-A OS=Saccharomyces cerevisiae (strain ATCC 204508 / S288c) OX=559292 GN=RPL12A PE=1 SV=1	HSGNIQLDEIIEIAR;NPHDIIEGINAGEIEIPEN;QAAASVVPSASSLVITALK;VDFKNPHDIIEGINAGEIEIPEN	2	3	1	1	2	2	3	1	1	2	20.6	23	9.1	9.1	23	2	4	1	0	1	+	6.30313	7.96793	0	14.116	21	17.822	2.0766	3.28371	21.8815	22.4818	22.0626	23.5541	23.9357	22.3493	20.1719	16.207	16.2035	20.9027	19.8202	19.2651
Color [DarkGray]	1	4	Q02204	Q02204	54S ribosomal protein L13, mitochondrial	MRPL13	RM13_YEAST 54S ribosomal protein L13, mitochondrial OS=Saccharomyces cerevisiae (strain ATCC 204508 / S288c) OX=559292 GN=MRPL13 PE=1 SV=2	DKITSDNQLDDMILQATEK;EAEPNAIHPFSDNYASPNIYVVNDVTSK;SGYLIPDYELTTLSTPLQFK	0	1	0	0	0	0	1	0	0	0	0	7.6	0	0	0	0	1	0	0	0	+	5.35374	6.79107	0	6.1831	7	30.271	2.2441	3.2797	16.0727	19.5734	18.8051	19.1578	19.7472	18.9814	15.4236	16.5776	16.3056	15.5014	15.4079	17.1379
Color [DarkGray]	1	4	P0CX24;P0CX23	P0CX24;P0CX23	60S ribosomal protein L20-B;60S ribosomal protein L20-A	RPL20B;RPL20A	RL20B_YEAST 60S ribosomal protein L20-B OS=Saccharomyces cerevisiae (strain ATCC 204508 / S288c) OX=559292 GN=RPL20B PE=1 SV=1;RL20A_YEAST 60S ribosomal protein L20-A OS=Saccharomyces cerevisiae (strain ATCC 204508 / S288c) OX=559292 GN=RPL20A PE=1 SV=1	ASGEIVSINQINEAHPTK;IFASNEVIAK;VAAVETLYQDMAAR	1	3	0	0	0	1	3	0	0	0	10.5	24.4	0	0	0	0	2	0	0	0	+	5.82042	7.13443	0	4.1825	5	20.437	1.68273	3.07317	19.8404	19.9385	20.2053	20.9538	20.3378	20.2758	15.9435	16.0591	16.4174	16.6899	16.6075	19.0505
Color [DarkGray]	1	4	P15646	P15646	rRNA 2-O-methyltransferase fibrillarin	NOP1	FBRL_YEAST rRNA 2-O-methyltransferase fibrillarin OS=Saccharomyces cerevisiae (strain ATCC 204508 / S288c) OX=559292 GN=NOP1 PE=1 SV=1	ANCIDSTVDAETVFAR;GKEDLLVTK;HAGVYIAR;IKPLEQLTLEPYER;IKPLEQLTLEPYERDHCIVVGR;ISVEEPSKEDGVPPTKVEYR;LAAGIMGGLDELFIAPGK;LAAGIMGGLDELFIAPGKK;MLIGMVDCVFADVAQPDQAR;NMAPGESVYGEKR;VLYLGAASGTSVSHVSDVVGPEGVVYAVEFSHRPGR	7	9	3	1	4	7	9	3	1	4	38.8	36.4	11	2.8	15	8	15	2	1	3	+	7.32591	8.63408	0	55.377	92	34.465	4.53081	3.06267	23.7579	24.2616	24.2361	24.3656	24.3786	24.5631	21.2026	20.7568	21.6037	21.5933	21.1436	21.3824
Color [DarkGray]	1	4	P0CX48;P0CX47	P0CX48;P0CX47	40S ribosomal protein S11-B;40S ribosomal protein S11-A	RPS11B;RPS11A	RS11B_YEAST 40S ribosomal protein S11-B OS=Saccharomyces cerevisiae (strain ATCC 204508 / S288c) OX=559292 GN=RPS11B PE=1 SV=1;RS11A_YEAST 40S ribosomal protein S11-A OS=Saccharomyces cerevisiae (strain ATCC 204508 / S288c) OX=559292 GN=RPS11A PE=1 SV=1	AFQKQPHIFNNPK;AYLHYIPK;CPFTGLVSIR;ILTGTVVSTK;NVPVHVSPAFR;STELTVQSER;TAIEGSYIDKK;VQVGDIVTVGQCRPISK	8	6	0	0	5	8	6	0	0	5	57.7	42.9	0	0	32.1	8	6	0	0	0	+	7.16844	8.29427	0	8.8171	39	17.749	3.54348	3.04341	23.3395	23.4032	23.32	22.734	22.8411	22.0419	15.9738	15.7175	17.2785	19.4723	19.4189	19.5955
Color [DarkGray]	1	4	Q02260	Q02260	Small nuclear ribonucleoprotein Sm D1	SMD1	SMD1_YEAST Small nuclear ribonucleoprotein Sm D1 OS=Saccharomyces cerevisiae (strain ATCC 204508 / S288c) OX=559292 GN=SMD1 PE=1 SV=1	QIILPDSLNLDSLLVDQK	0	1	0	0	0	0	1	0	0	0	0	12.3	0	0	0	0	1	0	0	0	+	5.77329	6.55144	0.0096308	1.5275	4	16.275	1.88472	2.77327	16.0072	18.929	18.6698	18.7952	19.865	19.5218	16.2225	16.467	16.9275	17.2283	17.1508	15.483
Color [DarkGray]	1	4	P02309	P02309	Histone H4	HHF1	H4_YEAST Histone H4 OS=Saccharomyces cerevisiae (strain ATCC 204508 / S288c) OX=559292 GN=HHF1 PE=1 SV=2	DNIQGITKPAIR	1	1	1	1	1	1	1	1	1	1	11.7	11.7	11.7	11.7	11.7	1	1	1	1	1	+	6.69809	7.47624	0.0095087	1.4668	12	11.368	1.01414	2.76954	20.9601	21.0141	20.9594	21.6635	21.4359	21.7028	20.1067	20.0333	20.518	20.2251	19.9917	16.2768
Color [DarkGray]	1	4	Q12159	Q12159	RNA annealing protein YRA1	YRA1	YRA1_YEAST RNA annealing protein YRA1 OS=Saccharomyces cerevisiae (strain ATCC 204508 / S288c) OX=559292 GN=YRA1 PE=1 SV=2	APPNAVAR;EFFASQVGGVQR;EVKVNVEGLPR;FNGSPIDGGR;GGNAPRPVK;GQSTGMANITFK;SLEDLDKEMADYFEK;SLEDLDKEMADYFEKK;VLLSYNER;VNVEGLPR	10	6	4	3	5	10	6	4	3	5	38.1	25.2	19.5	14.2	24.8	10	7	0	0	3	+	7.43348	8.59067	0	26.376	63	24.955	2.40648	2.68843	24.7352	24.6816	24.2153	23.5626	23.2455	23.4676	18.4549	17.1444	18.7653	21.222	21.1287	19.8597
Color [DarkGray]	1	4	P32912	P32912	Vacuolar morphogenesis protein 7	VAM7	VAM7_YEAST Vacuolar morphogenesis protein 7 OS=Saccharomyces cerevisiae (strain ATCC 204508 / S288c) OX=559292 GN=VAM7 PE=1 SV=1	MAANSVGKMSEK;MAANSVGKMSEKLR	1	1	1	0	1	1	1	1	0	1	3.8	3.8	3.8	0	4.4	0	0	1	0	1	+	5.81279	7.01691	0.009375	1.4225	7	36.711	2.46183	2.58261	19.2547	19.557	15.7155	20.2229	19.8601	19.7488	16.5972	15.8462	15.8394	17.7319	16.5786	17.7735
Color [DarkGray]	1	4	P04912;P04911	P04912;P04911	Histone H2A.2;Histone H2A.1	HTA2;HTA1	H2A2_YEAST Histone H2A.2 OS=Saccharomyces cerevisiae (strain ATCC 204508 / S288c) OX=559292 GN=HTA2 PE=1 SV=2;H2A1_YEAST Histone H2A.1 OS=Saccharomyces cerevisiae (strain ATCC 204508 / S288c) OX=559292 GN=HTA1 PE=1 SV=2	AGLTFPVGR;MSGGKGGKAGSAAK;NDDELNKLLGNVTIAQGGVLPNIHQNLLPK	2	2	0	1	2	2	2	0	1	2	29.5	29.5	0	6.8	29.5	2	3	0	0	1	+	6.65682	7.52323	0	11.13	16	13.989	3.45543	2.44886	21.944	21.835	21.8798	21.4359	21.8513	21.5471	18.5712	18.3989	18.5502	19.4777	18.8624	19.1476
Color [DarkGray]	1	4	P0CX38;P0CX37	P0CX38;P0CX37	40S ribosomal protein S6-B;40S ribosomal protein S6-A	RPS6B;RPS6A	RS6B_YEAST 40S ribosomal protein S6-B OS=Saccharomyces cerevisiae (strain ATCC 204508 / S288c) OX=559292 GN=RPS6B PE=1 SV=1;RS6A_YEAST 40S ribosomal protein S6-A OS=Saccharomyces cerevisiae (strain ATCC 204508 / S288c) OX=559292 GN=RPS6A PE=1 SV=1	EAAAEYAQLLAK;EDDVRDFVIRR;GAIVGPDLAVLALVIVK;IGQEVDGEAVGDEFK;IGQEVDGEAVGDEFKGYVFK;KGEQELEGLTDTTVPK;KGEQELEGLTDTTVPKR;TFEIDDEHRIR	5	5	2	2	4	5	5	2	2	4	27.5	27.5	14	14	25.4	2	6	0	1	3	+	6.88307	8.36678	0	93.484	43	26.996	3.41434	2.44657	22.9699	22.8629	23.2181	24.2575	24.2451	24.3153	21.4367	19.7707	16.174	21.3866	22.0061	22.0854
Color [DarkGray]	1	4	P05759;P0CH09;P0CH08;P0CG63	P05759;P0CH09;P0CH08;P0CG63	Ubiquitin-40S ribosomal protein S31;Ubiquitin;40S ribosomal protein S31;Ubiquitin-60S ribosomal protein L40;Ubiquitin;60S ribosomal protein L40;Polyubiquitin;Ubiquitin	RPS31;RPL40B;RPL40A;UBI4	RS31_YEAST Ubiquitin-40S ribosomal protein S31 OS=Saccharomyces cerevisiae (strain ATCC 204508 / S288c) OX=559292 GN=RPS31 PE=1 SV=3;RL40B_YEAST Ubiquitin-60S ribosomal protein L40 OS=Saccharomyces cerevisiae (strain ATCC 204508 / S288c) OX=559292 GN=RPL40	ECSNPTCGAGVFLANHK;ECSNPTCGAGVFLANHKDR;ESTLHLVLR;TITLEVESSDTIDNVK;TLSDYNIQK	2	5	3	2	3	2	5	3	2	3	16.4	34.9	22.4	16.4	22.4	3	5	3	1	2	+	7.59192	8.39372	0	71.458	45	17.216	4.82997	2.41546	23.1131	22.8673	22.9539	23.4747	23.4004	23.5786	20.8055	20.8164	20.9716	20.912	21.1806	21.1148
Color [DarkGray]	1	4	Q12523	Q12523	WD repeat-containing protein YPL247C	YPL247C	YP247_YEAST WD repeat-containing protein YPL247C OS=Saccharomyces cerevisiae (strain ATCC 204508 / S288c) OX=559292 GN=YPL247C PE=1 SV=1	LEPSPYDPNVLATFAADSNK;LQVLHSNDLLSWESVVDADVVYPVSK;SLAHSTIIYEPPSSSVSGATAGTITPSSK;SPMYSPLDFSPPVFSPNHSQLQQAR;STQLFASCGGDGSVR	1	1	3	3	1	1	1	3	3	1	2.9	4.8	12.2	11.5	2.9	1	3	5	4	2	+	5.94296	7.56602	0	27.998	37	57.323	1.13706	2.40398	20.1269	20.1898	20.769	19.9999	20.3379	20.4004	19.8122	20.1356	16.4149	16.9594	19.8115	16.7553
Color [DarkGray]	1	4	P32797	P32797	Cell division control protein 13	CDC13	CDC13_YEAST Cell division control protein 13 OS=Saccharomyces cerevisiae (strain ATCC 204508 / S288c) OX=559292 GN=CDC13 PE=1 SV=2	FTDISSLLDSSAR;NDIVQNYLYDR	1	2	0	0	0	1	2	0	0	0	1.2	2.6	0	0	0	0	2	0	0	0	+	4.93045	6.64645	0.0036298	2.2553	5	104.9	2.28908	2.31486	18.9052	17.691	17.4307	19.6149	19.0064	19.8864	15.4486	15.7518	15.7441	17.3408	17.6591	16.5631
Color [DarkGray]	1	4	P14120	P14120	60S ribosomal protein L30	RPL30	RL30_YEAST 60S ribosomal protein L30 OS=Saccharomyces cerevisiae (strain ATCC 204508 / S288c) OX=559292 GN=RPL30 PE=1 SV=3	KSELEYYAMLSK;TKVYYFQGGNNELGTAVGK;VGVVSILEAGDSDILTTLA;VYYFQGGNNELGTAVGK	3	4	1	0	1	3	4	1	0	1	45.7	47.6	18.1	0	18.1	3	3	0	0	0	+	6.96988	7.77679	0	121.75	21	11.415	2.30167	2.31357	21.71	21.7868	21.3737	21.262	22.2975	21.0064	17.8187	15.9166	15.9104	18.9868	19.2312	19.4072
Color [DarkGray]	1	4	P25655	P25655	General negative regulator of transcription subunit 1	CDC39	NOT1_YEAST General negative regulator of transcription subunit 1 OS=Saccharomyces cerevisiae (strain ATCC 204508 / S288c) OX=559292 GN=CDC39 PE=1 SV=3	ELPEVFFDPVIDLHSLK;GVISDTDNLLTFVK;LNQPSQSAQPPGVNVPNPQGGIAAVQSDLEQNQR;QIGWEGFDTFLK;RADQPFITQNTNPYSLSLPEPLGLK;SLKPSNFINTPEVIETLSGALGSITLEQQQTEQQR;SQAQVYQSIVEAATLANAPK;STQDLADQLMQAIAIR;TIIFQILTFIAK;VENNDVITTVFIK;VSPSNVDVVLESLEVQTK;VSQAVVNSLFATSESPLCR;YTTSEQDDQSATINR	7	5	7	0	0	7	5	7	0	0	5.7	4.1	6.5	0	0	2	3	6	0	0	+	5.2833	7.55528	0	21.183	38	240.28	2.4197	2.3078	19.9493	20.4631	20.2389	19.6533	20.1066	19.299	16.3852	16.9257	17.6524	16.7964	17.5247	17.8143
Color [DarkGray]	1	4	Q12499	Q12499	Nucleolar protein 58	NOP58	NOP58_YEAST Nucleolar protein 58 OS=Saccharomyces cerevisiae (strain ATCC 204508 / S288c) OX=559292 GN=NOP58 PE=1 SV=1	AIAPNLTQLVGELVGAR;AIKEYLPELLPGMSDNDLSK;ASETDLSEILPEEIEER;AYVLTETSAGYALLK;CKEWYGWHFPELAK;EQLSNYLSAR;EQLSNYLSARMK;EYLPELLPGMSDNDLSK;FNSAANALEEANSIIEGK;IILTMGIR;IVTDSVAYAR;KSTLIVSETK;KVEMTEAR;MKAIAPNLTQLVGELVGAR;MSLGLAHSIGR;SKASETDLSEILPEEIEER;SPASTIQILGAEK;SSSLIQDLDSSDK;SSSLIQDLDSSDKVLK;SSSLIQDLDSSDKVLKEFK;YDALAEDRDDSGDIGLESR;YGLLYHASLVGQATGK	18	16	11	5	7	18	16	11	5	7	39.3	37.6	32.1	16	18	15	19	9	2	7	+	7.1799	8.84271	0	224.96	153	56.956	4.64263	2.29214	24.2394	23.9762	23.9975	24.269	24.5779	24.3746	21.4953	21.3684	20.6518	22.0606	22.2058	22.0786
Color [DarkGray]	1	4	P20459	P20459	Eukaryotic translation initiation factor 2 subunit alpha	SUI2	IF2A_YEAST Eukaryotic translation initiation factor 2 subunit alpha OS=Saccharomyces cerevisiae (strain ATCC 204508 / S288c) OX=559292 GN=SUI2 PE=1 SV=1	GIEQLESAIEK;LLEYDNIEGMILLSELSR;LVAAPLYVLTTQALDK;SAEDMSTEQMQVK	1	2	3	1	0	1	2	3	1	0	5.3	8.9	14.8	3.6	0	0	1	0	0	0	+	5.6005	6.92273	0.0018904	2.5271	7	34.717	1.19119	2.27629	18.8874	19.0882	18.8823	19.1834	19.1886	19.0264	18.6855	16.7069	17.8361	16.1194	18.641	15.8092
Color [DarkGray]	1	4	Q06506	Q06506	Ribosomal RNA-processing protein 9	RRP9	RRP9_YEAST Ribosomal RNA-processing protein 9 OS=Saccharomyces cerevisiae (strain ATCC 204508 / S288c) OX=559292 GN=RRP9 PE=1 SV=1	LIVWSTESLSPVK;TIDEYNNFDAGDLDKDIIASR;VGENNLTCISCFQPVLNK	0	2	0	0	1	0	2	0	0	1	0	6.8	0	0	3.7	0	3	0	0	0	+	4.99596	7.04372	0	6.3604	11	65.053	1.33713	2.25844	16.235	17.1915	17.5769	20.8165	21.1822	20.4829	16.7158	17.1921	16.775	18.659	17.2028	19.8445
Color [DarkGray]	1	4	P08468	P08468	Protein PET111, mitochondrial	PET111	PT111_YEAST Protein PET111, mitochondrial OS=Saccharomyces cerevisiae (strain ATCC 204508 / S288c) OX=559292 GN=PET111 PE=1 SV=2	DYDIGQIYTTYEQFTPLLASHTDK;KINGGEDSSLSGFNAVDFER;YFVNTNQFEGLFK	2	1	1	1	1	2	1	1	1	1	4.6	2.5	2.5	2.5	2.5	1	0	0	0	0		4.81206	7.36434	0	3.7086	4	94.522	0.718692	2.00218	17.284	18.0742	17.546	20.6585	20.5726	20.5028	19.9085	20.3186	20.1319	20.19	19.4739	16.0633
Color [DarkGray]	1	4	P32342	P32342	Signal recognition particle subunit SRP21	SRP21	SRP21_YEAST Signal recognition particle subunit SRP21 OS=Saccharomyces cerevisiae (strain ATCC 204508 / S288c) OX=559292 GN=SRP21 PE=1 SV=3	SIQDIVGLATLIVNTDVEK;THNSHLSLNYK	0	2	0	0	0	0	2	0	0	0	0	18	0	0	0	0	2	0	0	0	+	5.4831	6.3282	0.0034014	1.8884	4	18.425	1.60858	1.99668	16.8556	16.9956	17.0213	18.8743	19.3054	18.1549	16.8137	16.6372	16.6377	17.5736	16.7871	15.9838
Color [DarkGray]	1	4	P41805	P41805	60S ribosomal protein L10	RPL10	RL10_YEAST 60S ribosomal protein L10 OS=Saccharomyces cerevisiae (strain ATCC 204508 / S288c) OX=559292 GN=RPL10 PE=1 SV=1	EAGEVKDDGAFVK;VDIGQIIFSVR;WGFTNLDRPEYLK	2	2	1	1	2	2	2	1	1	2	10.9	10.9	5	5	10.9	2	2	1	1	1	+	6.51424	7.64049	0	17.015	22	25.361	3.76794	1.97339	21.6021	21.6391	21.6043	21.2894	21.2919	21.2455	19.6636	19.4583	18.868	19.4803	19.4105	19.0158
Color [DarkGray]	1	4	Q03940	Q03940	RuvB-like protein 1	RVB1	RUVB1_YEAST RuvB-like protein 1 OS=Saccharomyces cerevisiae (strain ATCC 204508 / S288c) OX=559292 GN=RVB1 PE=1 SV=1	EIVVNDVNEAK;EVYEGEVTELTPEDAENPLGGYGK;GLGLDESGVAK;LDPTIYESIQR;LQVESSALDLLATMGTETSLR;RVEGGFVGQIEAR;SDAYATEFDLETEEYVPLPK;TAAHTHIK;TALALAISQELGPK;VAISEVKENPGVNSSNSGAVTR;VPFCPLVGSELYSVEVK;YALQLLAPCGILAQTSNR	3	11	10	5	3	3	11	10	5	3	11.2	38	34.3	19.7	10.6	3	8	9	2	2	+	6.69645	8.11906	0	91.277	84	50.452	2.51291	1.96727	20.5381	20.818	20.9623	21.265	21.0942	21.5946	20.0551	20.5628	20.3574	19.7674	19.4405	18.8441
Color [DarkGray]	1	4	P25443	P25443	40S ribosomal protein S2	RPS2	RS2_YEAST 40S ribosomal protein S2 OS=Saccharomyces cerevisiae (strain ATCC 204508 / S288c) OX=559292 GN=RPS2 PE=1 SV=3	CGSVTVR;EFQIIDTLLPGLQDEVMNIKPVQK;GSGIVASPAVK;GSGIVASPAVKK;GYWGTNLGQPHSLATK;ITTIEEIFLHSLPVK;LLQLAGVEDVYTQSNGK;LSVIPIR	5	4	1	1	2	5	4	1	1	2	33.1	26.4	4.7	4.7	14.2	3	6	0	0	1	+	6.45063	7.86401	0	20.608	36	27.449	1.54409	1.95246	22.1615	22.569	21.179	21.2073	22.5026	22.081	18.9785	16.9026	16.6205	20.4815	20.3524	19.0997
Color [DarkGray]	1	4	Q12460	Q12460	Nucleolar protein 56	NOP56	NOP56_YEAST Nucleolar protein 56 OS=Saccharomyces cerevisiae (strain ATCC 204508 / S288c) OX=559292 GN=NOP56 PE=1 SV=1	AILDLNLPK;APIEYLLFEEPTGYAVFK;AQLGLGHAYSR;ASLNDDSLHDLAALLNEDSGIAQR;DKASLNDDSLHDLAALLNEDSGIAQR;DKPAAEVEETKEK;EEFPYVDCISNELAQDLIR;EVQEQINDFGAFTK;GAAEALENANDISEGLVSESLK;GLQSGDLER;IDNYSEEPSNVFGSVLK;IDNYSEEPSNVFGSVLKK;ISMGQDISETDMENVCVFAQR;LEFYNTGKPTLK;LIELVSFAPFK;LISHAGSLTNLSK;LKEVQEQINDFGAFTK;LQQDDIGSR;MHTVAPNLSELIGEVIGAR;NELAIQEAMELYNK;QAASTVQILGAEK;VASLADYRR;VKLQQDDIGSR;YGLIYHSGFISK	20	22	9	9	14	20	22	9	9	14	48.8	51.4	26	25.8	37.9	19	20	10	4	10	+	7.1784	8.87965	0	169.58	199	56.863	6.25968	1.95025	23.3343	23.2704	23.3909	23.4568	23.5427	23.5166	20.9261	21.0741	20.8921	21.5131	21.5623	21.5899
Color [DarkGray]	1	4	P38911	P38911	FK506-binding nuclear protein	FPR3	FKBP3_YEAST FK506-binding nuclear protein OS=Saccharomyces cerevisiae (strain ATCC 204508 / S288c) OX=559292 GN=FPR3 PE=1 SV=2	DLEEGPTKPK;GWDIGVAGMSVGGER;ITMAALNPEAIDEENKPSTLR;QALPGIPANSELTFDVK;VLEGGIVIEDR	1	4	0	1	2	1	3	0	1	1	2.4	12.9	0	5.1	6.8	0	3	0	1	2	+	6.73535	7.6425	0	5.3701	13	46.553	4.30934	1.94563	19.8182	20.2877	19.9442	22.4343	22.3633	22.5731	16.2805	15.4808	19.4333	20.6761	20.397	20.4607
Color [DarkGray]	1	4	P38922	P38922	Protein HRB1	HRB1	HRB1_YEAST Protein HRB1 OS=Saccharomyces cerevisiae (strain ATCC 204508 / S288c) OX=559292 GN=HRB1 PE=1 SV=2	KFTENVVGGGER;LNNYNYGGCDLDISYAK;SDLYDLFETIGK	2	0	0	0	0	2	0	0	0	0	6.4	0	0	0	0	0	0	0	0	0	+	5.26112	6.60353	0.0082237	1.6136	4	52.141	1.43873	1.86155	19.8917	19.154	19.6567	17.3263	18.9882	17.2704	16.7492	16.8814	16.332	16.4003	15.9132	15.6866
Color [DarkGray]	1	4	P02293;P02294	P02293;P02294	Histone H2B.1;Histone H2B.2	HTB1;HTB2	H2B1_YEAST Histone H2B.1 OS=Saccharomyces cerevisiae (strain ATCC 204508 / S288c) OX=559292 GN=HTB1 PE=1 SV=2;H2B2_YEAST Histone H2B.2 OS=Saccharomyces cerevisiae (strain ATCC 204508 / S288c) OX=559292 GN=HTB2 PE=1 SV=2	KETYSSYIYK;LILPGELAK;MSAKAEKK;QTHPDTGISQK;SMSILNSFVNDIFER	4	4	1	3	3	4	4	1	3	3	34.4	34.4	6.1	22.9	26	3	4	1	1	2	+	7.08357	8.03782	0	26.692	30	14.252	2.329	1.83538	22.9315	23.0889	23.1644	22.3352	22.1271	21.984	19.7441	19.1655	20.1869	20.8997	20.1694	19.871
Color [DarkGray]	1	4	P18480	P18480	SWI/SNF chromatin-remodeling complex subunit SNF5	SNF5	SNF5_YEAST SWI/SNF chromatin-remodeling complex subunit SNF5 OS=Saccharomyces cerevisiae (strain ATCC 204508 / S288c) OX=559292 GN=SNF5 PE=1 SV=3	GQQTAQTQLEQQR;IFTPNLLQISAAELER	1	2	1	0	0	1	2	1	0	0	1.8	3.2	1.8	0	0	0	2	0	0	0	+	4.89659	6.31156	0.0035211	2.0433	5	102.54	1.41252	1.83442	18.8474	18.6857	18.586	18.4531	16.5941	18.3552	17.1309	17.8248	17.3324	15.9271	16.0317	15.9403
Color [DarkGray]	1	4	P48589	P48589	40S ribosomal protein S12	RPS12	RS12_YEAST 40S ribosomal protein S12 OS=Saccharomyces cerevisiae (strain ATCC 204508 / S288c) OX=559292 GN=RPS12 PE=1 SV=1	GEALLVVLVSSVTEANIIK;KVVGASVVVVK;LVEGLANDPENK;NWGAETDELSMIMEHFSQQ;QLGEWAGLGK;TALVHDGLAR;VVGASVVVVK	4	7	5	4	3	4	7	5	4	3	35	56.6	48.3	41.3	28	1	9	2	2	2	+	7.32187	8.16696	0	16.944	50	15.471	4.38136	1.83283	21.4991	22.0595	22.338	22.8917	22.7162	22.7108	20.6291	20.8435	21.07	20.7933	21.0147	21.0122
Color [DarkGray]	1	4	Q3E792;P0C0T4	Q3E792;P0C0T4	40S ribosomal protein S25-A;40S ribosomal protein S25-B	RPS25A;RPS25B	RS25A_YEAST 40S ribosomal protein S25-A OS=Saccharomyces cerevisiae (strain ATCC 204508 / S288c) OX=559292 GN=RPS25A PE=1 SV=1;RS25B_YEAST 40S ribosomal protein S25-B OS=Saccharomyces cerevisiae (strain ATCC 204508 / S288c) OX=559292 GN=RPS25B PE=1 SV=1	AQHAVILDQEKYDR;EGIIKPISK;HLEKEGIIKPISK	2	2	0	0	2	2	2	0	0	2	21.3	21.3	0	0	21.3	1	3	0	0	0	+	6.80686	7.72283	0	12.428	15	12.039	3.94285	1.77461	21.2843	21.4322	21.4398	22.1635	22.021	22.1011	15.8208	20.2788	20.5806	20.4924	20.3553	20.114
Color [DarkGray]	1	4	P0CX36;P0CX35	P0CX36;P0CX35	40S ribosomal protein S4-B;40S ribosomal protein S4-A	RPS4B;RPS4A	RS4B_YEAST 40S ribosomal protein S4-B OS=Saccharomyces cerevisiae (strain ATCC 204508 / S288c) OX=559292 GN=RPS4B PE=1 SV=1;RS4A_YEAST 40S ribosomal protein S4-A OS=Saccharomyces cerevisiae (strain ATCC 204508 / S288c) OX=559292 GN=RPS4A PE=1 SV=1	ESLPLIVFLR;GVPYVVTHDGR;HDGGFDLVHIKDSLDNTFVTR;ITDEEASYK;ITDFIKFDAGK;KVQLGKK;LAAPHHWLLDK;LNNVFVIGEQGKPYISLPK;LRESLPLIVFLR;LSGCYAPR;LSIAEERDR;TDTTYPAGFMDVITLDATNENFR;VRTDTTYPAGFMDVITLDATNENFR	10	10	1	0	6	10	10	1	0	6	47.1	44.8	8	0	31	6	6	0	0	3	+	6.77061	8.21943	0	14.59	55	29.41	2.7925	1.71428	23.182	23.094	23.189	21.4236	21.6787	21.608	16.1425	16.3701	16.8432	20.088	19.4314	20.0481
Color [DarkGray]	1	4	Q12452	Q12452	3-keto-steroid reductase	ERG27	ERG27_YEAST 3-keto-steroid reductase OS=Saccharomyces cerevisiae (strain ATCC 204508 / S288c) OX=559292 GN=ERG27 PE=1 SV=1	TQEIDPTGMSDVFAYIQK;YLSLNDIELLK	2	1	2	0	1	2	1	2	0	1	8.4	3.2	8.4	0	3.2	0	0	3	0	0		5.83831	7.16053	0	3.2119	11	39.724	0.524633	1.69776	19.5917	20.5105	19.2505	18.8147	19.6231	16.3092	15.2446	18.7562	18.2936	18.5107	16.0302	15.1127
Color [DarkGray]	1	4	P32790	P32790	Actin cytoskeleton-regulatory complex protein SLA1	SLA1	SLA1_YEAST Actin cytoskeleton-regulatory complex protein SLA1 OS=Saccharomyces cerevisiae (strain ATCC 204508 / S288c) OX=559292 GN=SLA1 PE=1 SV=1	IAVAADKLSNEDLAYVEK;SGDKVYILDDKK;VIGSDSEEPVGLVPSTYIEEAPVLK	1	0	0	0	0	1	0	0	0	0	1	0	0	0	0	0	0	0	0	0		4.4532	7.03571	0	3.4553	4	135.85	0.611328	1.59869	20.5336	21.0396	20.9666	15.8082	17.8941	19.8586	16.4188	16.9859	15.3096	16.0898	16.4235	16.2517
Color [DarkGray]	1	4	Q03175	Q03175	Dehydrodolichyl diphosphate syntase complex subunit SRT1	SRT1	SRT1_YEAST Dehydrodolichyl diphosphate synthase complex subunit SRT1 OS=Saccharomyces cerevisiae (strain ATCC 204508 / S288c) OX=559292 GN=SRT1 PE=1 SV=1	EEVDTLMNLFTVK;IVGDQSLLSPEMR	1	1	1	1	0	1	1	1	1	0	3.8	3.8	3.8	3.8	0	0	1	1	0	0		5.08458	6.315	0	5.6877	9	40.2	0.661721	1.58177	18.5767	19.0576	18.8276	17.7803	15.0114	18.5854	17.0748	17.2445	17.2873	15.6122	15.5198	15.4997
Color [DarkGray]	1	4	P39730	P39730	Eukaryotic translation initiation factor 5B	FUN12	IF2P_YEAST Eukaryotic translation initiation factor 5B OS=Saccharomyces cerevisiae (strain ATCC 204508 / S288c) OX=559292 GN=FUN12 PE=1 SV=2	KAPFVVALNK;SKGESDKPSASAK;VDKEAEQYAEQEGIK	0	2	0	0	1	0	2	0	0	1	0	2.3	0	0	1.3	0	2	0	0	0	+	4.73159	6.87147	0	13.833	9	112.27	1.71633	1.532	16.9023	20.2525	19.4291	19.3391	18.0182	18.6854	16.141	17.1136	15.6604	16.9259	17.1346	17.3863
Color [DarkGray]	1	4	P32385	P32385	Ribonucleoprotein 1	RNP1	RNP1_YEAST Ribonucleoprotein 1 OS=Saccharomyces cerevisiae (strain ATCC 204508 / S288c) OX=559292 GN=RNP1 PE=4 SV=2	DLFEPNYGK;FDNLGTGDSIQKK;IVIENILTK;IVIENILTKEEK;KTTTVVPENTK;QDLRDLFEPNYGK;TAPDLKPLSTNTLYVK;TTTVVPENTK;VFFSDEFHTGEAFIK	7	2	0	0	0	7	2	0	0	0	26.9	8.8	0	0	0	7	0	0	0	0	+	6.62335	8.01406	0	14.51	22	28.861	2.43521	1.51573	22.9656	23.1804	23.3753	18.3478	17.6624	18.1276	15.8085	15.6993	15.6911	16.7145	16.6323	16.2436
Color [DarkGray]	1	4	P40150	P40150	Heat shock protein SSB2	SSB2	SSB2_YEAST Ribosome-associated molecular chaperone SSB2 OS=Saccharomyces cerevisiae (strain ATCC 204508 / S288c) OX=559292 GN=SSB2 PE=1 SV=2	ARFEDLNAALFK;AVITVPAYFNDAQR;DAGAISGLNVLR;ENTLLGEFDLK;FDDESVQK;FDDESVQKDMK;FEDLNAALFK;HVLIFDLGGGTFDVSLLHIAGGVYTVK;IEAALSDALAALQIEDPSADELR;IEAALSDALAALQIEDPSADELRK;IINEPTAAAIAYGLGAGK;IINEPTAAAIAYGLGAGKSEK;KKTGLDISDDAR;KTGLDISDDAR;LESYVASIEQTVTDPVLSSK;LLSDFFDGK;LLSDFFDGKQLEK;LSSEEIEKMVNQAEEFK;LSSEEIEKMVNQAEEFKAADEAFAK;MKEIAEAK;MVNQAEEFK;MVNQAEEFKAADEAFAK;NIPMMPAGEPVLEAIFEVDANGILK;NQAALNPR;NTTVPTIK;N…	37	41	41	33	33	1	2	2	0	0	65.6	67.2	71.5	62.2	65.9	47	52	57	26	32	+	8.16077	9.81082	0	323.31	642	66.594	6.16127	1.50389	25.2603	25.201	25.281	25.3616	25.3089	25.3511	23.7713	23.8247	23.8195	23.8784	23.8304	23.801
Color [DarkGray]	1	4	P11484	P11484	Heat shock protein SSB1	SSB1	SSB1_YEAST Ribosome-associated molecular chaperone SSB1 OS=Saccharomyces cerevisiae (strain ATCC 204508 / S288c) OX=559292 GN=SSB1 PE=1 SV=3	ARFEDLNAALFK;AVITVPAYFNDAQR;DAGAISGLNVLR;ENTLLGEFDLK;FDDESVQK;FDDESVQKDMK;FEDLNAALFK;HVLIFDLGGGTFDVSLLHIAGGVYTVK;IEAALSDALAALQIEDPSADELR;IEAALSDALAALQIEDPSADELRK;IINEPTAAAIAYGLGAGK;IINEPTAAAIAYGLGAGKSEK;KKTGLDISDDAR;KTGLDISDDAR;LESYVASIEQTVTDPVLSSK;LLSDFFDGK;LLSDFFDGKQLEK;LSSEEIEKMVNQAEEFK;LSSEEIEKMVNQAEEFKAADEAFAK;MKEIAEAK;MVNQAEEFK;MVNQAEEFKAADEAFAK;NIPMMPAGEPVLEAIFEVDANGILK;NQAALNPR;NTTVPTIK;N…	2	2	2	2	2	2	2	2	2	2	67.7	69.2	73.4	67.7	71.5	2	4	7	2	2	+	7.14082	8.61794	0	166.98	47	66.601	3.47279	1.46772	25.0367	24.905	25.0109	24.9756	24.8745	25.0353	23.5097	23.5497	23.3257	23.2671	23.674	23.5411
Color [DarkGray]	1	4	P38754;P36105	P38754;P36105	60S ribosomal protein L14-B;60S ribosomal protein L14-A	RPL14B;RPL14A	RL14B_YEAST 60S ribosomal protein L14-B OS=Saccharomyces cerevisiae (strain ATCC 204508 / S288c) OX=559292 GN=RPL14B PE=1 SV=1;RL14A_YEAST 60S ribosomal protein L14-A OS=Saccharomyces cerevisiae (strain ATCC 204508 / S288c) OX=559292 GN=RPL14A PE=1 SV=1	LAAIVEIIDQKK;QAINLGQVVLTPLTFALPR;WAAAGVCEK	3	2	1	1	1	3	2	1	1	1	29	20.3	13.8	13.8	13.8	2	2	0	0	1	+	6.232	7.1351	0	3.9448	11	15.153	2.32772	1.44654	20.1239	20.5036	20.2241	19.8068	20.5216	19.9405	18.1406	18.119	16.687	18.533	18.8985	18.4977
Color [DarkGray]	1	4	P33327	P33327	NAD-specific glutamate dehydrogenase	GDH2	DHE2_YEAST NAD-specific glutamate dehydrogenase OS=Saccharomyces cerevisiae (strain ATCC 204508 / S288c) OX=559292 GN=GDH2 PE=1 SV=1	EASLLYAIPNNSFHEVYQR;EEILFFGPDEGTAGFVDWATNHAR;FASDAVGNDTLEHGKDTIKK;FEYPETPYGIFFVVGNTFK;NQDIYDLNSK;NTFHTQIFK;NVIDENYQLASTQQR	0	1	6	0	0	0	1	6	0	0	0	1.7	9.7	0	0	0	0	4	0	0		5.47257	7.50296	0	47.114	20	124.33	0.585772	1.44451	15.7835	17.146	16.4566	19.9121	20.394	19.5073	16.1827	16.1391	16.135	16.354	19.6221	19.5038
Color [DarkGray]	1	4	P04819	P04819	DNA ligase 1	CDC9	DNLI1_YEAST DNA ligase 1 OS=Saccharomyces cerevisiae (strain ATCC 204508 / S288c) OX=559292 GN=CDC9 PE=1 SV=2	IGTGFSDEMLQLLHDR;LTPTIIDGPK;TQGKDSQLKK	2	2	1	1	0	2	2	1	1	0	3.4	3.4	2.1	2.1	0	1	0	0	0	0		4.85648	7.01561	0	4.1571	6	84.827	0.398935	1.41704	20.6907	20.5308	20.7702	19.0844	19.6757	15.0621	18.8713	17.8693	18.5649	16.3788	17.2719	15.9203
Color [DarkGray]	1	4	P32898	P32898	Mitochondrial presequence protease	CYM1	CYM1_YEAST Mitochondrial presequence protease OS=Saccharomyces cerevisiae (strain ATCC 204508 / S288c) OX=559292 GN=CYM1 PE=1 SV=2	DGSALQVMSNMLTFK;DTVNNIFQNLLETEHPFDR;FQQSIYPSLNNSGGDPMK;KYPVGGIFHGYEVR;LHSLLDNEETFQR;LHTGGISTHVEVTSDPNTTEPR;NITDPESNIVFK;SSGAINETLNGIEQLQFINR	0	1	6	0	0	0	1	6	0	0	0	1.5	10	0	0	0	0	5	0	0	+	5.13178	7.21566	0	24.3	20	112.18	1.92217	1.41034	17.7479	16.867	16.1043	18.0743	18.1146	18.1497	16.9772	17.4794	17.4876	16.5076	16.2685	17.3314
Color [DarkGray]	1	4	P0CD98	P0CD98	Putative uncharacterized protein YLL053C		YLL53_YEAST Putative uncharacterized protein YLL053C OS=Saccharomyces cerevisiae (strain ATCC 204508 / S288c) OX=559292 GN=YLL053C PE=5 SV=1	MWFPQIIAGMAAGGAASAMTPGK	1	1	1	1	1	1	1	1	1	1	15.1	15.1	15.1	15.1	15.1	5	23	24	17	11		8.87988	9.48194	0.0019157	2.6212	185	16.456	0.76014	1.40424	24.6338	25.8751	24.9272	27.8592	28.3496	25.6005	25.7891	25.8253	25.7547	25.852	25.9968	25.7478
Color [DarkGray]	1	4	P05030;P19657	P05030;P19657	Plasma membrane ATPase 1;Plasma membrane ATPase 2	PMA1;PMA2	PMA1_YEAST Plasma membrane ATPase 1 OS=Saccharomyces cerevisiae (strain ATCC 204508 / S288c) OX=559292 GN=PMA1 PE=1 SV=2;PMA2_YEAST Plasma membrane ATPase 2 OS=Saccharomyces cerevisiae (strain ATCC 204508 / S288c) OX=559292 GN=PMA2 PE=1 SV=3	ADTGIAVEGATDAAR;GYLVAMTGDGVNDAPSLK;KADTGIAVEGATDAAR;LGLGGGGDMPGSELADFVENADGFAEVFPQHK;SVEDFMAAMQR;TVEEDHPIPEDVHENYENK;VLEFHPFDPVSK;VTAVVESPEGER	1	3	6	0	0	1	3	6	0	0	1.3	4.9	11.8	0	0	0	2	11	0	0		5.38653	7.51477	0	22.41	35	99.618	0.91526	1.37066	18.3877	18.3514	18.5227	18.7102	17.8073	18.0099	16.2444	16.4686	17.6087	17.3483	17.5442	15.523
Color [DarkGray]	1	4	P10591	P10591	Heat shock protein SSA1	SSA1	HSP71_YEAST Heat shock protein SSA1 OS=Saccharomyces cerevisiae (strain ATCC 204508 / S288c) OX=559292 GN=SSA1 PE=1 SV=4	ARFEELCADLFR;ATAGDTHLGGEDFDNR;ATAGDTHLGGEDFDNRLVNHFIQEFK;AVGIDLGTTYSCVAHFANDRVDIIANDQGNR;DAGTIAGLNVLR;DAKLDKSQVDEIVLVGGSTR;DNNLLGKFELSGIPPAPR;ELQDIANPIMSK;ETAESYLGAK;FEELCADLFR;FELSGIPPAPR;FKEEDEKESQR;GKEEHVLIFDLGGGTFDVSLLSIEDGIFEVK;IASKNQLESIAYSLK;IINEPTAAAIAYGLDK;IINEPTAAAIAYGLDKK;ITITNDKGR;KDLSTNQR;KSEIFSTYADNQPGVLIQVFEGER;LDKSQVDEIVLVGGSTR;LIDVDGKPQIQVEFK;LIDVDGKPQIQVEFKGETK;LSKEDIEK;LVNHFIQE…	33	36	37	30	34	7	8	8	8	8	56.9	64.2	65	59.2	65	39	58	63	36	37	+	8.12021	9.87988	0	323.31	725	69.656	5.58715	1.33539	25.1649	25.1689	25.1632	25.4928	25.393	25.4735	24.0755	24.1214	24.2336	24.087	24.1366	24.1295
Color [DarkGray]	1	4	Q01217	Q01217	Protein ARG5,6, mitochondrial;N-acetyl-gamma-glutamyl-phosphate reductase;Acetylglutamate kinase	ARG5,6	ARG56_YEAST Protein ARG5,6, mitochondrial OS=Saccharomyces cerevisiae (strain ATCC 204508 / S288c) OX=559292 GN=ARG5,6 PE=1 SV=1	SVTKEPIEASIK;YFTSVSQQQFAVIK;YLENSDFVSYADEPLEAVAIVK	0	1	3	0	1	0	1	3	0	1	0	1.6	5.6	0	2.5	0	0	2	0	0		5.3477	7.0379	0.0034602	1.9609	3	94.868	0.433395	1.31948	18.4789	18.6874	19.8858	18.9068	18.9386	18.7788	15.7509	17.0459	16.5775	18.7999	18.9147	14.9511
Color [DarkGray]	1	4	P10592	P10592	Heat shock protein SSA2	SSA2	HSP72_YEAST Heat shock protein SSA2 OS=Saccharomyces cerevisiae (strain ATCC 204508 / S288c) OX=559292 GN=SSA2 PE=1 SV=3	ARFEELCADLFR;ATAGDTHLGGEDFDNR;ATAGDTHLGGEDFDNRLVNHFIQEFK;AVGIDLGTTYSCVAHFSNDRVDIIANDQGNR;DAGTIAGLNVLR;DAKLDKSQVDEIVLVGGSTR;DNNLLGKFELSGIPPAPR;ETAESYLGAK;FEELCADLFR;FELSGIPPAPR;FKEEDEKESQR;GKEEHVLIFDLGGGTFDVSLLSIEDGIFEVK;IASKNQLESIAYSLK;IINEPTAAAIAYGLDK;IINEPTAAAIAYGLDKK;ITITNDKGR;KDLSTNQR;KSEVFSTYADNQPGVLIQVFEGER;LDKSQVDEIVLVGGSTR;LIDVDGKPQIQVEFK;LIDVDGKPQIQVEFKGETK;LSKEDIEK;LVNHFIQEFK;LVNHFIQEFK…	6	7	8	6	5	5	5	6	5	4	57.9	62.1	66	57.1	60.4	7	9	16	5	5	+	6.9339	8.80592	0	44.597	135	69.469	3.20904	1.22406	22.9474	23.1232	22.9837	23.2094	23.3239	23.4369	21.9254	22.0094	22.109	22.0663	21.933	22.2988
Color [DarkGray]	1	4	P53600	P53600	Coatomer subunit zeta	RET3	COPZ_YEAST Coatomer subunit zeta OS=Saccharomyces cerevisiae (strain ATCC 204508 / S288c) OX=559292 GN=RET3 PE=1 SV=1	SDEGHQLLFNSVK;SSLSLYTVQAVLILDQQGER	1	2	2	1	1	1	2	2	1	1	6.9	17.5	17.5	10.6	6.9	0	1	2	0	0		5.82373	7.11334	0	31.48	11	21.687	0.647493	1.19904	19.3804	18.8122	19.0388	19.5545	19.2338	18.3646	18.0438	17.6552	18.8509	18.5343	16.3393	18.6823
Color [DarkGray]	1	4	Q12754	Q12754	Ribosomal RNA-processing protein 12	RRP12	RRP12_YEAST Ribosomal RNA-processing protein 12 OS=Saccharomyces cerevisiae (strain ATCC 204508 / S288c) OX=559292 GN=RRP12 PE=1 SV=1	ANAPLIR;GQPKPSTNVDDPLSAVTSGINAYLEAVK;SYILETIDQYLK;VLAESNVSYAEESSSHNVLLLQR	1	0	0	0	0	1	0	0	0	0	1.9	0	0	0	0	1	0	0	0	0		4.67983	6.4357	0	4.2614	7	137.51	1.16906	1.1415	20.0216	20.1073	19.9759	18.0031	16.5478	17.6371	17.3164	15.9967	16.9994	16.4353	16.3506	15.9776
Color [DarkGray]	1	4	P53829	P53829	Protein CAF40	CAF40	CAF40_YEAST Protein CAF40 OS=Saccharomyces cerevisiae (strain ATCC 204508 / S288c) OX=559292 GN=CAF40 PE=1 SV=1	NDSQDVITFLLR	1	1	1	0	1	1	1	1	0	1	3.2	3.2	3.2	0	3.2	1	1	1	0	1		5.52463	6.72874	0	4.4143	11	41.155	0.563496	1.09161	19.2912	18.8683	18.8237	18.5296	16.5357	18.9828	17.3339	17.8226	16.178	17.7481	16.3873	16.6379
Color [DarkGray]	1	4	P05318	P05318	60S acidic ribosomal protein P1-alpha	RPP1A	RLA1_YEAST 60S acidic ribosomal protein P1-alpha OS=Saccharomyces cerevisiae (strain ATCC 204508 / S288c) OX=559292 GN=RPP1A PE=1 SV=4	STESALSYAALILADSEIEISSEK	0	1	0	0	0	0	1	0	0	0	0	22.6	0	0	0	0	1	0	0	0		5.24763	5.84968	0	3.9612	3	10.908	0.981246	1.02375	17.0551	17.0602	15.2591	17.5699	17.7225	17.7158	16.047	15.8857	16.4675	17.6181	16.1311	16.1879
Color [DarkGray]	1	4	Q08208	Q08208	Nucleolar protein 12	NOP12	NOP12_YEAST Nucleolar protein 12 OS=Saccharomyces cerevisiae (strain ATCC 204508 / S288c) OX=559292 GN=NOP12 PE=1 SV=1	HFEPCGDIEYVR;KGTTIGTGLDR;SISFDEALPR;SSAIDNLFGNIDEK	3	0	0	0	0	3	0	0	0	0	7.8	0	0	0	0	0	0	0	0	0		5.25943	6.69079	0	4.4328	6	51.941	0.973595	0.981609	19.5986	19.6401	19.5799	18.2032	17.5459	16.676	16.1258	18.0705	17.3181	16.7057	16.1663	16.6082
Color [DarkGray]	1	4	P47064	P47064	AP-3 complex subunit sigma	APS3	AP3S_YEAST AP-3 complex subunit sigma OS=Saccharomyces cerevisiae (strain ATCC 204508 / S288c) OX=559292 GN=APS3 PE=1 SV=1	LLLEQVYELISQR	0	0	1	0	0	0	0	1	0	0	0	0	6.7	0	0	0	0	1	0	0		5.35835	6.1365	0.0093604	1.4164	3	21.938	1.99966	0.981177	17.1004	17.1584	16.0608	16.674	16.8179	16.7572	15.4171	15.9915	15.9924	16.0287	15.355	15.9218
Color [DarkGray]	1	4	P39531	P39531	Recyclin-1	RCY1	RCY1_YEAST Recyclin-1 OS=Saccharomyces cerevisiae (strain ATCC 204508 / S288c) OX=559292 GN=RCY1 PE=1 SV=4	ESELNYQSNNLAAVAR;FNGIFTQEEIYEFVQR;ILLISNEESNAIEFFK;IYNTLKDQTDASSASNNELPNDLSIITETSK;NFETSIDDFVAEGLNIGINK;YNPNEIEQIEIK	1	1	3	0	0	1	1	3	0	0	1.9	1.9	5.7	0	0	1	0	3	0	0		5.2652	7.01678	0	30.074	16	97.47	0.667049	0.977392	18.8304	18.8198	17.6725	18.5806	17.2347	16.7691	17.2005	17.1353	14.8196	16.9727	16.8929	15.7866
Color [DarkGray]	1	4	P46990;P05740	P46990;P05740	60S ribosomal protein L17-B;60S ribosomal protein L17-A	RPL17B;RPL17A	RL17B_YEAST 60S ribosomal protein L17-B OS=Saccharomyces cerevisiae (strain ATCC 204508 / S288c) OX=559292 GN=RPL17B PE=1 SV=2;RL17A_YEAST 60S ribosomal protein L17-A OS=Saccharomyces cerevisiae (strain ATCC 204508 / S288c) OX=559292 GN=RPL17A PE=1 SV=4	ETAQAINGWELTK;FVQGLLQNAAANAEAK	1	0	0	0	0	1	0	0	0	0	8.7	0	0	0	0	1	0	0	0	0		5.84435	6.68945	0	4.2899	5	20.551	0.536139	0.946743	21.0245	20.8171	20.9154	17.6662	18.2594	15.739	18.055	16.3014	16.5415	16.0272	16.205	16.5922
Color [DarkGray]	1	4	P13711	P13711	Acyl-coenzyme A oxidase	POX1	ACOX_YEAST Acyl-coenzyme A oxidase OS=Saccharomyces cerevisiae (strain ATCC 204508 / S288c) OX=559292 GN=POX1 PE=3 SV=2	DSHISDEITK;LGGAANAEILSK;LLAHIGTLVEK;TEPQLDQISGYSALLSGR;TTINPDSVVLNPQK;VLPQLCVPYLVSPVAFK;VVQPQLLALLPIVR	3	4	0	1	4	3	4	0	1	4	6.3	7.6	0	2.3	7.6	1	3	0	0	2		5.76617	7.45512	0	6.5182	22	84.041	2.39423	0.932752	19.6041	19.9418	19.9486	20.0332	20.3045	20.2507	19.4444	19.6078	19.6055	19.5291	19.1093	19.1518
Color [DarkGray]	1	4	P50094	P50094	Inosine-5-monophosphate dehydrogenase 4	IMD4	IMDH4_YEAST Inosine-5-monophosphate dehydrogenase 4 OS=Saccharomyces cerevisiae (strain ATCC 204508 / S288c) OX=559292 GN=IMD4 PE=1 SV=1	DGLSVQELMDSTTR;DIQFLEDDSLVVSEVMTK;EQAANLIAAGADGLR;ETFPDLEIIAGNVATR;FGFSGFPVTEDGK;GGLTYNDFLVLPGLVNFPSSAVSLQTK;GITLKEGNEILK;GMGSIDAMQK;LLIVDDNGNLVSMLSR;LVGLVTSR;MFENGFINSPIVISPTTTVGEVK;NQNYPLASK;QLLCGAAIGTIEADKER;TASAQLEGGVHNLHSYEKR;WIKETFPDLEIIAGNVATR;YFSESDSVLVAQGVSGAVVDK;YFSESDSVLVAQGVSGAVVDKGSIK;YFSESDSVLVAQGVSGAVVDKGSIKK	7	0	2	0	0	7	0	2	0	0	45	2.9	18.1	2.9	2.9	7	0	1	0	0		6.46987	7.95758	0	34.303	27	56.393	0.90915	0.925379	23.3894	22.9772	23.6106	17.3272	18.1547	16.5163	17.2419	15.6751	16.8558	16.4242	16.4752	16.3228
Color [DarkGray]	1	4	P25694	P25694	Cell division control protein 48	CDC48	CDC48_YEAST Cell division control protein 48 OS=Saccharomyces cerevisiae (strain ATCC 204508 / S288c) OX=559292 GN=CDC48 PE=1 SV=3	AAAPTVVFLDELDSIAK;AVATEVSANFISVK;DTVLIVLIDDELEDGACR;EVDIGIPDATGRLEVLR;LDQLIYVPLPDENAR;LGDLVTIHPCPDIK;NAPAIIFIDEIDSIAPK;RYEAYSQQMK;SNVVVIAATNRPNSIDPALRR;VVSQLLTLMDGMK	4	7	6	3	5	4	7	6	3	5	8	13.8	11.9	5.7	9.3	3	4	3	1	4		5.97421	7.85405	0	14.865	47	91.995	2.87667	0.885818	20.3497	20.447	20.6035	20.7543	20.9589	20.8424	20.0137	19.9424	19.2437	20.0767	20.0417	19.7799
Color [DarkGray]	1	4	P39990	P39990	13 kDa ribonucleoprotein-associated protein	SNU13	SNU13_YEAST 13 kDa ribonucleoprotein-associated protein OS=Saccharomyces cerevisiae (strain ATCC 204508 / S288c) OX=559292 GN=SNU13 PE=1 SV=1	ACGVSRPVIAASITTNDASAIK;AFPLADAALTQQILDVVQQAANLR;DKIETLLI	3	3	3	3	3	3	3	3	3	3	42.9	42.9	42.9	42.9	42.9	2	5	4	2	3		6.7337	7.90935	0	37.225	43	13.569	1.69292	0.884039	20.8993	20.9123	20.8702	21.6057	22.302	21.8516	19.9349	19.8948	20.0061	20.858	21.2662	20.9829
Color [DarkGray]	1	4	P0CS90;P39987	P0CS90	Heat shock protein SSC1, mitochondrial	SSC1	HSP77_YEAST Heat shock protein SSC1, mitochondrial OS=Saccharomyces cerevisiae (strain ATCC 204508 / S288c) OX=559292 GN=SSC1 PE=1 SV=1	ADQLANDTENSLKEFEGK;AKIELSSTVSTEINLPFITADASGPK;ALKDAGLSTSDISEVLLVGGMSR;AQFETLTAPLVK;AQFETLTAPLVKR;DAGLSTSDISEVLLVGGMSR;DAGQIVGLNVLR;DKATNKDSSITVAGSSGLSENEIEQMVNDAEK;DSSITVAGSSGLSENEIEQMVNDAEK;FEDAEVQR;FKSQDEAR;FKTETGIDLENDR;FSRAQFETLTAPLVK;GQTYSPAQIGGFVLNK;HSNGDAWVEAR;IELSSTVSTEINLPFITADASGPK;IIENAEGSR;KQAIETANK;KSQIFSTAAAGQTSVEIR;LIGNFTLAGIPPAPK;MKETAEAYLGKPVK;NAVVTVPAYFNDSQR;QAVVNPENTLFATK;SLFGK…	22	26	34	21	20	22	26	34	21	20	45.6	49.7	58.3	41.4	41.1	15	21	42	13	15		7.67364	9.30285	0	323.31	369	70.627	4.28376	0.877629	23.5718	23.6503	23.6795	23.9527	23.8332	23.8881	23.0306	23.0721	23.1292	23.0606	22.9497	23.0308
[truncated: 374 more rows]
[truncated: 3 more columns]

## Sheet: slz1D exp2
Symbol color	Symbol type	Symbol size	Protein IDs	Majority protein IDs	Protein names	Gene names	Fasta headers	Peptide sequences	Razor + unique peptides Mum_minusR_1	Razor + unique peptides Mum_plusR_1	Razor + unique peptides Slz1_1	Razor + unique peptides WT_minusR_1	Razor + unique peptides WT_plusR_1	Unique peptides Mum_minusR_1	Unique peptides Mum_plusR_1	Unique peptides Slz1_1	Unique peptides WT_minusR_1	Unique peptides WT_plusR_1	Sequence coverage Mum_minusR_1 [%]	Sequence coverage Mum_plusR_1 [%]	Sequence coverage Slz1_1 [%]	Sequence coverage WT_minusR_1 [%]	Sequence coverage WT_plusR_1 [%]	MS/MS count Mum_minusR_1	MS/MS count Mum_plusR_1	MS/MS count Slz1_1	MS/MS count WT_minusR_1	MS/MS count WT_plusR_1	t-test Significant LFQ log2 [Mum2 slz1del]/[WT-] s0=1	iBAQ	Intensity	Q-value	Score	MS/MS count	Mol. weight [kDa]	-Log t-test p value LFQ log2 [Mum2 slz1del]/[WT-] s0=1	t-test Difference LFQ log2 [Mum2 slz1del]/[WT-] s0=1	LFQ intensity Mum_minusR_1	LFQ intensity Mum_minusR_2	LFQ intensity Mum_minusR_3	LFQ intensity Mum_plusR_1	LFQ intensity Mum_plusR_2	LFQ intensity Mum_plusR_3	LFQ intensity WT_minusR_1	LFQ intensity WT_minusR_2	LFQ intensity WT_minusR_3	LFQ intensity WT_plusR_1	LFQ intensity WT_plusR_2	LFQ intensity WT_plusR_3
[truncated: 500 more rows]
[truncated: 3 more columns]

[truncated: 3 more sheets: WT exp1, kar4D exp1, slz1D exp1]
