# Supplementary material for: The yeast RNA methylation complex consists of conserved yet reconfigured components with m6A-dependent and independent roles
Source: bioRxiv preprint, doi:10.1101/2023.02.10.528004, version 2 (2023-06-02)
Supplement: Table S2 [file 528004_file04.csv]

	ime4_0_A	ime4_0_B	ime4_2_A	ime4_2_B	ime4_4_A	ime4_4_B	ime4_6_A	ime4_6_B	ime4_8_A	ime4_8_B	mum2_0_A	mum2_0_B	mum2_2_A	mum2_2_B	mum2_4_A	mum2_4_B	mum2_6_A	mum2_6_B	mum2_8_A	mum2_8_B	dyn2_0_A	dyn2_0_B	dyn2_2_A	dyn2_2_B	dyn2_4_A	dyn2_4_B	dyn2_6_A	dyn2_6_B	dyn2_8_A	dyn2_8_B	kar4_0_A	kar4_0_B	kar4_2_A	kar4_2_B	kar4_4_A	kar4_4_B	kar4_6_A	kar4_6_B	kar4_8_A	kar4_8_B	WT_0_A	WT_0_B	WT_2_A	WT_2_B	WT_4_A	WT_6_A	WT_6_B	WT_8_A	WT_8_B
Unit10097	27.0619840329333	18.6598467475801	35.3123049122174	38.6437530948305	35.8891267777135	33.0311186651019	60.3122716154441	57.5051590566196	60.5844755122224	54.8314275977124	17.4016870325816	28.0135075826963	37.8639550310865	41.4583429967253	44.727872203031	62.1218963276765	58.4007999251825	51.5372975427668	50.2623853645477	44.2592221863917	14.6805528691836	17.1531098926318	54.5889318462703	45.9138460295556	64.2225609227017	57.1337785927164	49.3494676996888	62.3372995041372	19.272245117064	42.9002828782182	28.6619684063698	21.1682151891348	36.6667453559693	42.2119802063531	34.8561831906	44.8815126867309	55.3343007024396	60.5290036765167	64.2735519513552	64.959758888297	30.2496303325935	24.2164542115607	50.1211808417944	61.3606129206354	72.203415594159	49.8298634702934	63.8626044562933	27.7227376282031	49.3244186199405
Unit10117	20.2964880247	27.1415952692074	12.7516656627452	6.90067019550545	5.62966694552368	6.00565793910943	5.88412406004333	5.33553022174821	5.86301375924733	3.8254484370497	18.9836585809981	17.5084422391852	8.60544432524694	10.5291029832953	6.38969602900444	6.21218963276765	4.04758019283443	7.82845025966078	6.75166370568551	5.53240277329896	48.2361022844604	39.666566626711	11.2643827619288	11.4784615073889	7.66836548330767	18.6016953557681	8.36431655926929	23.0376976428333	9.1289582133461	19.4265431901365	37.0919591141257	19.7083382795393	16.2015851572888	8.85089907552564	8.71404579765001	3.74012605722758	5.03039097294906	6.83391976992931	10.7122586585592	4.996904529869	30.2496303325935	38.1409153832081	20.4197403429533	17.9361791614165	17.6105891693071	13.2879635920782	19.3740485429205	20.4272803576233	13.0564637523372
Unit10378	8.11859520987999	4.24087426081366	1.96179471734541	2.76026807820218	0.70370836819046	1.50141448477736	0	1.77851007391607	7.81735167899644	6.37574739508284	11.0738008389156	12.2559095674296	1.72108886504939	1.97420680936787	1.27793920580089	3.10609481638382	3.46935445100094	3.26185427485866	13.503327411371	8.29860415994844	1.0486109192274	2.14413873657898	2.59947294506049	1.76591715498291	8.62691116872113	5.31477010164803	239.219453595102	32.5238084369411	219.094997120306	255.782818670131	3.37199628310233	2.18981536439326	2.55814502483507	3.40419195212525	6.5355343482375	4.67515757153447	1.00607819458981	3.90509701138818	5.76813927768572	21.6532529627657	1.95158905371571	2.42164542115607	1.85634003117757	2.83202828864471	8.21827494567664	207.070765976552	71.7557353441498	354.559223350176	335.115902976654
Unit10808	2.70619840329333	0.848174852162731	0.980897358672707	4.14040211730327	9.14820878647598	8.25777966627547	1.47103101501083	8.89255036958036	17.589041277742	7.65089687409941	3.16394309683302	1.75084422391852	1.72108886504939	2.63227574582383	11.501452852208	7.76523704095956	10.9862890948363	10.4379336795477	11.2527728428092	8.29860415994844	2.0972218384548	0	2.59947294506049	0	11.5025482249615	10.6295402032961	5.8550215914885	24.3928563277059	3.04298607111536	18.6171038905475	0	2.91975381919101	1.70543001655671	3.40419195212525	8.71404579765001	5.61018908584137	9.0547037513083	17.5729365512468	14.0083382458082	9.993809059738	0	2.42164542115607	2.78451004676635	3.77603771819295	17.6105891693071	19.9319453881173	13.6335897153885	7.29545727057976	13.0564637523372
Unit11342	13.5309920164667	9.32992337379005	10.7898709453998	11.0410723128087	13.3704589956187	12.7620231206075	9.56170159757041	11.2638971348018	12.7031964783692	15.9393684877071	9.49182929049907	8.75422111959259	14.6292553529198	21.0582059665906	16.6132096754115	15.5304740819191	17.9249979968382	15.6569005193216	21.7553608294311	8.29860415994844	10.486109192274	9.64862431460539	14.7303466886761	8.82958577491455	16.2952766520288	11.9582327287081	18.4014964303924	16.2619042184706	21.3009024978076	18.6171038905475	8.42999070775583	10.9490768219663	21.3178752069589	14.9784445893511	10.8925572470625	8.41528362876205	17.1033293080268	11.7152910341645	9.06421886493471	13.3250787463173	11.7095343222943	8.47575897404625	13.9225502338318	4.72004714774119	10.5663535015842	16.6099544900978	17.221376482596	30.640920536435	36.2679548676033
Unit11565	5.41239680658666	9.32992337379005	11.7707683040725	9.66093827370763	7.0370836819046	6.75636518149811	5.88412406004333	8.299713678275	3.90867583949822	3.8254484370497	3.16394309683302	5.25253267175556	9.46598875777163	9.87103404683937	5.11175682320355	10.8713318573434	4.04758019283443	9.13319196960425	5.25129399331096	6.63888332795875	4.1944436769096	4.28827747315795	10.397891780242	7.94662719742309	11.5025482249615	5.31477010164803	10.0371798711232	16.9394835609068	10.1432869037179	14.5699073926024	10.115988849307	2.91975381919101	19.6124451904022	12.2550910276509	11.9818129717688	3.74012605722758	7.04254736212868	5.85764551708226	2.47205969043674	6.66253937315867	5.85476716114713	7.26493626346821	9.28170015588784	14.1601414432236	11.1533731405612	13.2879635920782	5.74045882753199	8.75454872469571	15.9579001417455
Unit1183	39.2398768477533	27.1415952692074	52.9684573683262	35.8834850166283	24.6297928866661	36.0339476346566	26.478558270195	36.7558748609321	49.8356169536023	31.8787369754142	41.1312602588293	35.0168844783704	30.1190551383643	48.6971012977409	17.8911488812124	38.8261852047978	37.0064474773434	23.4853507789824	28.5070245351166	38.1735791357628	26.215272980685	38.5944972584216	41.5915671209678	34.4353845221667	32.5905533040576	41.1894682877723	53.5316259793235	48.1081333129754	47.6734484474741	66.3740225662998	28.6619684063698	24.0879690083258	43.4884654221962	46.9778489393284	44.6594847129563	26.1808824005931	47.2856751457211	29.2882275854113	29.6647162852409	46.6377756121107	35.1286029668828	30.8759791197399	38.9831406547289	55.696556343346	42.8524336453139	62.0104967630318	42.3358838530484	105.054584696349	76.888064319319
Unit12956	2.70619840329333	7.63357366946458	3.92358943469083	4.14040211730327	5.62966694552368	6.00565793910943	5.88412406004333	11.2638971348018	17.589041277742	9.56362109262426	9.49182929049907	10.5050653435111	8.60544432524694	6.58068936455958	6.38969602900444	3.10609481638382	8.09516038566886	7.82845025966078	9.00221827424735	12.7245263785876	4.1944436769096	6.43241620973693	0.86649098168683	7.06366861993164	11.5025482249615	5.31477010164803	33.4572662370772	10.8412694789804	18.2579164266922	20.2359824897255	10.115988849307	7.29938454797753	3.41086003311343	8.85089907552564	7.62479007294375	7.48025211445516	6.03646916753887	14.6441137927057	6.59215917449797	9.993809059738	3.90317810743142	4.23787948702312	8.35353014029906	3.77603771819295	7.04423566772283	17.7172847894376	8.61068824129798	23.3454632658552	27.5636456993785
Unit13213	2.70619840329333	2.54452455648819	1.96179471734541	4.14040211730327	0	2.25212172716604	0	0.592836691305357	2.93150687962367	1.27514947901657	1.58197154841651	5.25253267175556	0.860544432524693	1.31613787291192	0	1.55304740819191	0.57822574183349	0	1.50036971237456	3.31944166397938	3.1458327576822	1.07206936828949	0.86649098168683	0.882958577491455	1.91709137082692	1.32869252541201	23.420086365954	2.03273802730882	23.3295598785511	25.9020575868487	1.68599814155117	2.91975381919101	0	0	0	0.935031514306895	0	1.95254850569409	0.824019896812246	3.33126968657933	0.975794526857855	3.63246813173411	0	0.944009429548238	0.587019638976903	17.7172847894376	9.32824559473948	40.8545607152467	29.0143638940826
Unit14431	1.35309920164667	1.69634970432546	2.94269207601812	2.76026807820218	0.70370836819046	1.50141448477736	5.14860855253791	4.1498568391375	4.88584479937278	4.46302317655799	1.58197154841651	1.75084422391852	3.44217773009877	2.63227574582383	1.27793920580089	4.65914222457573	2.31290296733396	3.26185427485866	5.25129399331096	4.42592221863917	2.0972218384548	4.28827747315795	1.73298196337366	1.76591715498291	2.87563705624038	0	41.8215827963465	10.8412694789804	17.2435877363204	60.7079474691766	1.68599814155117	2.18981536439326	3.41086003311343	2.7233535617002	2.1785114494125	3.74012605722758	4.02431277835925	4.88137126423522	2.47205969043674	11.6594439030277	1.95158905371571	1.21082271057804	2.78451004676635	3.77603771819295	3.52211783386142	40.9712210755746	21.5267206032449	83.1682128846093	58.0287277881653
Unit14480	4.05929760494	6.78539881730185	0.980897358672707	1.38013403910109	2.81483347276184	0.750707242388679	0.735515507505416	0.592836691305357	0.977168959874555	1.27514947901657	1.58197154841651	7.00337689567408	0.860544432524693	0	0	0	4.62580593466792	3.91422512983039	0	0.553240277329896	2.0972218384548	6.43241620973693	0.86649098168683	0	0.958545685413459	0	1.67286331185386	4.06547605461764	1.01432869037179	0.809439299589022	5.0579944246535	5.83950763838202	0	1.3616767808501	0	0.935031514306895	0	2.92882275854113	2.47205969043674	1.66563484328967	3.90317810743142	4.23787948702312	0	0.944009429548238	1.17403927795381	1.10733029933985	1.435114706883	2.9181829082319	0
Unit1923	10.8247936131733	6.78539881730185	63.758328313726	48.3046913685381	124.556381169711	53.3002142095962	83.8487678556174	42.0914050826803	53.7442927931005	44.6302317655799	15.8197154841651	19.2592864631037	47.3299437888581	48.0390323612849	60.0631426726417	94.7358918997066	45.6798336048457	53.494410107682	51.012570220735	47.0254235730412	19.9236074653206	16.0810405243423	101.379444857359	37.9672188321326	67.0981979789421	29.2312355590642	71.9331224097159	47.4305539705392	91.2895821334609	70.4212190642449	10.115988849307	7.29938454797753	31.5504553062992	53.1053944531538	38.1239503647188	43.9464811724241	48.2917533403109	34.1695988496465	41.2009948406123	36.6439665523727	7.80635621486284	14.5298725269364	36.1986306079626	95.344952384372	41.0913747283832	56.4738452663325	87.5419971198628	86.0863957928412	91.3952462663603
Unit2281	4.05929760494	3.39269940865093	1.96179471734541	2.76026807820218	0	1.50141448477736	4.41309304503249	5.33553022174821	2.93150687962367	4.46302317655799	3.16394309683302	7.00337689567408	0.860544432524693	0	1.27793920580089	6.21218963276765	4.04758019283443	2.60948341988693	3.7509242809364	2.76620138664948	2.0972218384548	4.28827747315795	0	2.64887573247436	1.91709137082692	1.32869252541201	1.67286331185386	2.03273802730882	2.02865738074358	3.23775719835609	3.37199628310233	8.02932300277528	0.852715008278356	2.04251517127515	0	1.87006302861379	3.01823458376943	2.92882275854113	3.29607958724899	0	2.92738358057356	2.42164542115607	3.71268006235514	0.944009429548238	3.52211783386142	1.10733029933985	1.435114706883	2.9181829082319	2.90143638940826
Unit3628	16.23719041976	20.3561964519056	26.4842286841631	15.181474430112	19.7038343093329	12.7620231206075	18.3878876876354	15.4137539739393	12.7031964783692	15.3017937481988	26.8935163230807	19.2592864631037	13.7687109203951	17.7678612843109	10.2235136464071	15.5304740819191	17.9249979968382	11.7426753894912	11.2527728428092	9.95832499193813	23.0694402230028	15.0089711560528	9.53140079855513	12.3614200848804	13.4196395957884	6.64346262706004	15.8922014626117	16.9394835609068	13.1862729748332	8.90383229547924	20.231977698614	18.2484613699438	16.2015851572888	18.3826365414763	19.6066030447125	18.7006302861379	12.0729383350777	15.6203880455527	10.7122586585592	18.3219832761863	22.4432741177307	12.1082271057804	14.8507202494205	19.824198020513	3.52211783386142	12.1806332927384	15.0687044222715	7.29545727057976	5.80287277881653
Unit3665	13.5309920164667	21.2043713040683	7.84717886938166	4.14040211730327	7.0370836819046	12.7620231206075	10.2972171050758	8.299713678275	7.81735167899644	17.852092706232	22.1476016778312	8.75422111959259	7.74489989272224	7.23875830101554	14.0573312638098	4.65914222457573	14.4556435458373	15.6569005193216	14.2535122675583	13.8310069332474	25.1666620614576	15.0089711560528	9.53140079855513	11.4784615073889	9.58545685413459	6.64346262706004	6.69145324741543	22.360118300397	21.3009024978076	14.5699073926024	11.8019869908582	13.8688306411573	8.52715008278356	10.2125758563757	10.8925572470625	7.48025211445516	8.04862555671849	6.83391976992931	18.1284377298694	4.996904529869	19.5158905371571	19.3731633692486	8.35353014029906	4.72004714774119	11.1533731405612	14.3952938914181	13.6335897153885	16.0500059952755	21.760772920562
Unit4321	48.71157125928	41.5605677559738	61.7965335963805	49.6848254076392	64.7411698735223	60.0565793910943	58.8412406004333	51.5767921435661	69.3789961510934	55.4690023372207	49.0411180009118	43.771105597963	61.9591991417779	48.6971012977409	93.2895620234648	69.887133368636	52.0403167650141	58.0610060924841	57.7642339264205	56.9837485649793	28.3124948191398	46.098982836448	46.7905130110888	34.4353845221667	38.3418274165384	46.5042383894203	190.70641755134	34.55654646425	184.607821647665	104.417669646984	35.4059609725745	37.9567996494832	66.5117706457118	56.5095864052791	51.1950190611938	66.3872375157895	66.4011608429276	76.1493917220694	60.9774723641062	74.953567948035	30.2496303325935	35.719269962052	31.5577805300187	38.7043866114777	33.4601194216835	86.3717633485085	53.0992441546709	245.12736429148	166.832592390975
Unit4374	6.76549600823333	5.08904911297639	16.675255097436	24.8424127038196	35.8891267777135	41.2888983313774	49.2795390028629	35.5702014783214	46.9041100739786	48.4556802026296	6.32788619366604	8.75422111959259	24.9557885432161	18.4259302207668	57.5072642610399	37.2731377966059	39.3193504446773	45.6659598480212	51.012570220735	57.5369888423092	4.1944436769096	6.43241620973693	28.5942023956654	29.137633057218	67.0981979789421	70.4207038468364	58.550215914885	92.8283699137695	12.1719442844615	112.512062642874	1.68599814155117	3.64969227398876	26.434165256629	21.1059901031765	30.499160291775	56.1018908584137	42.2552841727721	42.9560671252699	63.449532054543	46.6377756121107	3.90317810743142	6.05411355289018	42.6958207170841	49.0884903365084	85.1178476516509	105.196378437286	68.1679485769423	53.9863838022902	46.4229822305322
Unit452	25.7088848312866	19.5080215997428	23.541536608145	13.8013403910109	14.0741673638092	20.2690955444943	20.5944342101516	27.8633244913518	86.9680374288354	35.7041854124639	82.2625205176586	89.2930554198445	29.2585107058396	14.4775166020311	19.1690880870133	26.4018059392625	24.2854811570066	31.3138010386431	66.7664522006679	52.5578263463401	23.0694402230028	30.0179423121057	13.8638557069893	14.1273372398633	31.6320076186441	10.6295402032961	1518.9598871633	106.379956762495	2017.49976514949	1187.44745249709	25.2899721232675	20.4382767343371	28.9923102814641	17.7017981510513	15.2495801458875	20.5706933147517	20.1215638917962	22.454307815482	21.4245173171184	179.888563075284	33.1770139131671	21.1893974351156	16.7070602805981	17.9361791614165	32.8730997827065	837.141706300929	307.114547272961	2937.15109713541	1898.99011686771
Unit4860	13.5309920164667	11.8744479302782	14.7134603800906	15.181474430112	13.3704589956187	21.7705100292717	16.9168566726246	15.4137539739393	17.589041277742	10.2011958321325	9.49182929049907	21.0101306870222	11.187077622821	13.8194476655751	17.8911488812124	10.8713318573434	13.2991920621703	21.5282382140672	14.2535122675583	12.1712861012577	14.6805528691836	12.8648324194739	13.8638557069893	12.3614200848804	12.461093910375	14.6156177795321	23.420086365954	13.5515868487255	25.3582172592947	8.90383229547924	15.1739832739605	15.3287075507528	18.7597301821238	12.9359294180759	11.9818129717688	14.9605042289103	10.0607819458981	17.5729365512468	16.4803979362449	11.6594439030277	11.7095343222943	14.5298725269364	24.1324204053084	16.9921697318683	17.0235695303302	18.8246150887775	19.3740485429205	14.5909145411595	21.760772920562
Unit6223	10.8247936131733	11.0262730781155	3.92358943469083	2.76026807820218	7.74079205009506	5.25495069672075	5.88412406004333	13.6352439000232	12.7031964783692	12.1139200506574	15.8197154841651	17.5084422391852	3.44217773009877	5.92262042810362	2.55587841160177	12.4243792655353	5.20403167650141	5.21896683977386	21.0051759732438	14.9374874879072	10.486109192274	7.50448557802641	9.53140079855513	8.82958577491455	2.87563705624038	2.65738505082402	6.69145324741543	6.77579342436274	12.1719442844615	10.5227108946573	8.42999070775583	6.56944609317978	2.55814502483507	6.80838390425049	3.26776717411875	3.74012605722758	7.04254736212868	3.90509701138818	10.7122586585592	13.3250787463173	7.80635621486284	9.08117032933527	7.42536012471027	7.5520754363859	7.04423566772283	15.5026241907579	12.916032361947	10.2136401788117	4.3521545841124
Unit6437	4.05929760494	0.848174852162731	33.350510194872	19.3218765474153	38.0002518822848	41.2888983313774	43.3954149428195	36.7558748609321	34.2009135956094	47.8181054631213	1.58197154841651	5.25253267175556	23.2346996781667	25.0066195853264	42.1719937914293	31.0609481638382	33.5370930263424	28.7043176187562	40.5099822341131	32.6411763624639	1.0486109192274	1.07206936828949	51.122967919523	34.4353845221667	44.0931015290191	45.1755458640083	39.3122878285657	52.1736093675931	16.2292590459486	58.2796295704096	3.37199628310233	1.45987690959551	35.814030347691	38.1269498638028	37.0346946400125	37.4012605722758	36.2188150052332	52.7188096537404	45.3210943246735	46.6377756121107	1.95158905371571	3.63246813173411	36.1986306079626	45.3124526183154	72.7904352331359	56.4738452663325	37.3129823789579	27.7227376282031	23.2114911152661
Unit7099	36.53367844446	111.959080485481	90.242556997889	56.5854956031447	36.5928351459039	35.2832403922679	30.8916513152275	22.5277942696036	18.5662102376165	22.9526906222982	53.7870326461614	57.7778593893111	62.8197435743026	44.7486876790051	53.6734466436373	34.1670429802221	28.333061349841	20.2234965041237	19.5048062608693	22.1296110931958	67.1110988305536	68.6124395705272	45.924022029402	75.0514790867737	23.9636421353365	50.4903159656563	11.710043182977	25.0704356701421	9.1289582133461	16.9982252913695	91.043899643763	105.841075945674	63.9536256208767	72.1688693850552	38.1239503647188	29.9210084578206	37.224893199823	15.6203880455527	23.8965770075551	28.3157923359243	73.1845895143391	28.4543336985838	40.8394806859065	57.5845752024425	22.8937659200992	22.1466059867971	34.4427529651919	13.1318230870436	11.6057455576331
Unit7364	59.5363648724533	76.3357366946458	120.650375116743	115.931259284492	51.3707108779036	54.8016286943736	52.2216010328845	47.4269353044286	57.6529686325987	55.4690023372207	56.9509757429944	54.2761709414741	109.289142930636	97.3942025954817	81.7881091712568	45.0383748375654	58.4007999251825	52.1896683977386	74.2683007625407	63.0693916156081	50.3333241229152	43.954844099869	47.6570039927756	90.9447334816198	26.8392791915768	31.8886206098882	108.736115270501	36.5892844915588	54.7737492800766	91.4666408535595	91.043899643763	110.950645129258	99.7676559685677	117.104203153108	77.3371564541438	74.8025211445516	65.3950826483377	60.5290036765167	57.6813927768572	88.2786466943523	73.1845895143391	32.0868018303179	43.6239907326729	80.2408015116002	17.0235695303302	44.2932119735941	38.0305397323994	118.186407783392	101.550273629289
Unit7541	43.2991744526933	46.6496168689502	15.6943577387633	6.90067019550545	9.14820878647598	9.00848690866415	19.1234031951408	16.59942735655	19.5433791974911	21.6775411432817	33.2214025167467	42.0202613740445	13.7687109203951	10.5291029832953	14.0573312638098	15.5304740819191	15.6120950295042	12.3950462444629	15.7538819799329	17.1504485972268	24.1180511422302	54.6755377827639	13.8638557069893	16.7762129723376	16.2952766520288	9.30084767788406	22.5836547100271	14.906745533598	20.2865738074358	21.8548610889036	50.579944246535	62.7747071126068	11.938010115897	12.9359294180759	18.5173473200063	11.2203781716827	16.097251113437	12.6915652870116	11.5362785553714	19.987618119476	40.007575601172	35.719269962052	10.2098701714766	18.8801885909648	8.80529458465354	27.6832574834963	15.0687044222715	20.4272803576233	15.9579001417455
Unit790	39.2398768477533	33.0788192343465	74.5481992591257	57.9656296422458	52.7781276142845	46.5438490280981	55.1636630629062	45.0555885392071	37.1324204752331	33.1538864544308	23.7295732262477	28.0135075826963	55.0748436815804	51.9874459800207	53.6734466436373	55.9097066949088	49.7274137976801	36.532767878417	32.257948816053	36.5138583037731	42.9930476883234	22.5134567340792	38.9920941759073	48.56272176203	33.5490989894711	35.8746981861242	25.9293813337348	25.0704356701421	17.2435877363204	15.3793466921914	33.7199628310233	32.1172920111011	46.8993254553096	66.0413238712298	40.3024618141313	47.6866072296516	39.2370495890026	47.8374383895052	40.3769749438001	39.975236238952	36.1043974937406	22.4002201456937	49.1930108262056	49.0884903365084	27.0029033929375	15.5026241907579	33.0076382583089	20.4272803576233	23.2114911152661
Unit8022	2.70619840329333	4.24087426081366	0	1.38013403910109	1.40741673638092	3.7535362119434	2.20654652251625	0.592836691305357	0	2.55029895803314	1.58197154841651	1.75084422391852	2.58163329757408	1.31613787291192	3.83381761740266	0	1.15645148366698	0.652370854971732	0	2.76620138664948	2.0972218384548	0	0.86649098168683	0.882958577491455	0.958545685413459	3.98607757623602	3.34572662370772	2.03273802730882	5.07164345185894	0.809439299589022	0	1.45987690959551	0	0	4.357022898825	3.74012605722758	1.00607819458981	0.976274252847044	2.47205969043674	1.66563484328967	0.975794526857855	1.21082271057804	5.56902009353271	0.944009429548238	1.17403927795381	4.42932119735941	5.02290147409049	1.45909145411595	2.90143638940826
Unit8340	644.075219983813	592.874221661749	429.633043098646	429.221686160439	641.078323421509	761.217143782121	1248.16981623669	1613.70147373318	1693.4338074626	2000.07195783749	669.173964980184	509.495669160289	511.163392919668	485.654875104497	729.703286512306	625.87810550134	1606.88933655527	1523.93831721397	1909.22045899663	1906.46599567882	664.819322790172	628.23264981764	525.960025883906	473.26579753542	1299.78794942065	1068.26879043125	1032.99309506976	1567.2410190551	450.361938525074	1104.07520463943	699.689228743734	578.841194654618	445.117234321302	452.757529632658	747.229427148488	862.099056190957	1323.99890408019	1598.16095191061	2051.80954306249	1837.1952321485	586.452510641571	607.833000710174	507.708998527065	446.516460176316	1420.00050668513	1249.06857765535	1275.81697441898	576.341124375801	674.583960537421
Unit8712	10.8247936131733	5.93722396513912	2.94269207601812	1.38013403910109	2.81483347276184	3.7535362119434	2.20654652251625	5.33553022174821	3.90867583949822	3.8254484370497	6.32788619366604	5.25253267175556	4.30272216262347	1.31613787291192	1.27793920580089	0	4.62580593466792	4.56659598480212	5.25129399331096	2.21296110931958	7.3402764345918	3.21620810486846	4.33245490843415	1.76591715498291	3.83418274165383	1.32869252541201	11.710043182977	4.06547605461764	5.07164345185894	1.61887859917804	1.68599814155117	2.91975381919101	0.852715008278356	3.40419195212525	3.26776717411875	5.61018908584137	2.01215638917962	4.88137126423522	3.29607958724899	8.32817421644833	4.87897263428927	3.63246813173411	4.64085007794392	0.944009429548238	4.69615711181522	6.64398179603912	5.02290147409049	1.45909145411595	2.90143638940826
YAL001C	18.9433888230533	21.2043713040683	32.3696128361993	24.8424127038196	34.4817100413325	36.0339476346566	20.5944342101516	30.8275079478786	14.6575343981183	28.0532885383645	12.6557723873321	21.0101306870222	25.8163329757408	26.9808263946943	26.8367233218186	29.5079007556463	23.1290296733396	20.2234965041237	24.7561002541802	24.3425722025154	13.6319419499562	16.0810405243423	35.52613024916	37.9672188321326	24.9221878207499	27.9025430336522	48.5130360437619	17.6170629033431	69.9886796356534	43.7097221778072	20.231977698614	15.3287075507528	18.7597301821238	28.5952123978521	19.6066030447125	19.6356618004448	30.1823458376943	20.5017593097879	23.0725571107429	31.6470620225037	16.5885069565835	12.1082271057804	28.7732704832523	18.8801885909648	25.2418444760068	24.3612665854768	19.3740485429205	65.6591154352178	63.8316005669818
YAL002W	16.23719041976	10.1780982259528	17.6561524561087	19.3218765474153	21.1112510457138	11.2606086358302	13.9747946426029	17.1922640478554	20.5205481573657	10.2011958321325	7.90985774208256	8.75422111959259	12.0476220553457	13.8194476655751	8.94557444060621	20.1896163064948	10.9862890948363	13.6997879544064	15.0036971237456	11.6180458239278	5.243054596137	5.36034684144744	9.53140079855513	10.5955029298975	7.66836548330767	10.6295402032961	7.52788490334236	7.45337276679901	12.1719442844615	5.66607509712315	5.0579944246535	6.56944609317978	16.2015851572888	11.5742526372258	19.6066030447125	13.0904412002965	8.04862555671849	10.7390167813175	11.5362785553714	13.3250787463173	6.83056168800498	9.08117032933527	12.994380218243	12.2721225841271	8.21827494567664	8.85864239471882	8.61068824129798	10.2136401788117	2.90143638940826
YAL003W	231.37996348158	117.048129598457	60.8156362377078	62.106031759549	81.6301707100933	69.8157735421472	72.0805197355308	71.7332396479482	64.4931513517206	65.6701981693533	177.180813422649	136.565849465644	48.1904882213828	57.9100664081243	70.2866563190488	76.0993230014037	71.6999919873528	69.8036814819753	62.2653430635442	83.5392818768143	179.312467187885	154.377989033686	50.2564769378361	43.2649702970813	54.6371040685671	67.7633187960124	67.7509641300813	46.7529746281029	304.298607111537	51.8041151736974	106.217882917724	135.038614137584	52.0156155049797	57.8712631861292	67.5338549317875	71.9974266016309	76.4619427888257	77.1256659749165	72.5137509194777	76.6192027913247	111.240576061795	217.342676548757	43.6239907326729	65.1366506388284	73.3774548721128	65.3324876610513	89.6946691801873	81.7091214304933	89.9445280716562
YAL005C	396.458066082473	431.72099975083	814.144807698347	830.840691538856	675.560033462841	649.361764666208	747.283755625503	706.661336035986	854.045670930361	822.471413965687	401.820773297794	404.445015725178	747.813111863959	895.631822516558	728.425347306506	726.826187033815	767.883785154875	730.002986713368	885.21813030099	855.862709029349	287.319391868308	344.134267220925	817.967486712367	797.311595474784	881.862030580382	547.421320469747	966.91499425153	522.413673018367	461.519554119164	503.471244344372	544.577399721027	464.970795706169	914.110488874398	852.409664812162	648.107156200219	807.867228361157	715.321596353356	944.057202503092	823.195876915434	987.721462070772	490.824647009501	349.322352001763	606.095020179476	704.231034442985	504.836889520136	538.162525479168	466.412279736974	442.104710597133	396.046067154228
YAL007C	29.7681824362266	11.8744479302782	33.350510194872	31.7430828993251	40.1113769868562	48.7959707552642	33.0981978377437	31.4203446391839	21.4977171172402	29.9660127568894	25.3115447746642	22.7609749109407	33.561232868463	40.1422051238134	38.3381761740266	49.6975170621412	33.5370930263424	31.3138010386431	20.2549911170565	24.8958124798453	19.9236074653206	25.7296648389477	38.1256031942205	30.9035502122009	40.2589187873653	38.5320832369482	20.0743597422463	24.3928563277059	19.272245117064	8.90383229547924	10.115988849307	7.29938454797753	27.2868802649074	41.531141815928	32.6776717411875	37.4012605722758	35.2127368106434	27.3356790797172	18.1284377298694	19.987618119476	21.4674795908728	21.1893974351156	41.7676507014953	33.9843394637366	35.8081979775911	21.0392756874572	22.9618353101279	11.6727316329276	21.760772920562
YAL008W	21.6495872263466	32.2306443821838	48.0639705749626	55.2053615640436	41.5187937232371	39.0367766042113	36.7757753752708	45.6484252305125	46.9041100739786	36.3417601519722	28.4754878714972	33.2660402544519	49.0510326539075	35.5357225686217	53.6734466436373	32.6139955720301	47.4145108303462	42.4041055731626	42.7605368026749	38.1735791357628	40.8958258498686	31.0900116803951	32.9266573040995	48.56272176203	49.8443756414999	38.5320832369482	51.0223310115427	25.7480150125784	46.6591197571023	33.1870112831499	33.7199628310233	35.0370458302921	54.5737605298148	54.4670712340039	42.4809732635438	29.9210084578206	45.2735187565415	41.0035186195758	37.0808953565511	28.3157923359243	52.6929044503241	29.6651564091619	38.0549706391402	45.3124526183154	29.3509819488451	38.7565604768948	35.8778676720749	39.3954692611307	42.0708276464198
YAL009W	17.5902896214067	13.5707976346037	12.7516656627452	13.8013403910109	21.8149594139043	16.5155593325509	14.7103101501083	13.0424072087179	4.88584479937278	15.3017937481988	20.5656301294146	3.50168844783704	17.2108886504939	15.793654474943	14.0573312638098	12.4243792655353	17.9249979968382	17.6140130842368	9.00221827424735	19.3634097065464	20.972218384548	12.8648324194739	19.0628015971103	7.94662719742309	19.1709137082692	18.6016953557681	16.7286331185386	12.1964281638529	11.1576155940897	12.1415894938353	20.231977698614	10.9490768219663	18.7597301821238	18.3826365414763	22.8743702188313	19.6356618004448	19.1154856972064	14.6441137927057	18.9524576266817	16.6563484328967	21.4674795908728	16.3461065928035	20.4197403429533	15.1041508727718	16.4365498913533	18.8246150887775	12.916032361947	4.37727436234786	14.5071819470413
YAL010C	13.5309920164667	20.3561964519056	9.80897358672707	11.0410723128087	12.6667506274283	9.75919415105283	12.5037636275921	10.6710604434964	16.6118723178674	14.0266442691823	20.5656301294146	24.5118191348593	9.46598875777163	11.8452408562072	11.501452852208	15.5304740819191	12.1427405785033	8.48082111463252	15.7538819799329	12.7245263785876	12.5833310307288	19.2972486292108	17.3298196337366	8.82958577491455	6.70981979789421	7.97215515247205	10.8736115270501	7.45337276679901	10.1432869037179	4.85663579753413	18.5459795570628	25.5478459179214	6.82172006622685	7.48922229467554	4.357022898825	11.2203781716827	17.1033293080268	16.5966622983997	9.06421886493471	6.66253937315867	24.3948631714464	13.3190498163584	11.1380401870654	15.1041508727718	11.7403927795381	6.64398179603912	7.89313088785648	7.29545727057976	11.6057455576331
YAL011W	6.76549600823333	14.4189724867664	6.86628151070895	8.28080423460654	8.44450041828552	4.50424345433208	6.61963956754874	6.52120360435893	7.81735167899644	7.01332213459113	7.90985774208256	3.50168844783704	5.16326659514816	5.92262042810362	11.501452852208	21.7426637146868	9.25161186933584	5.21896683977386	4.50110913712368	10.511565269268	16.7777747076384	12.8648324194739	10.397891780242	6.18071004244018	2.87563705624038	14.6156177795321	11.710043182977	3.38789671218137	13.1862729748332	11.3321501942463	23.6039739817163	10.9490768219663	12.7907251241753	5.44670712340039	13.071068696475	6.54522060014826	5.03039097294906	7.81019402277635	5.76813927768572	1.66563484328967	15.6127124297257	13.3190498163584	8.35353014029906	10.3841037250306	8.80529458465354	9.96597269405867	6.45801618097348	10.2136401788117	13.0564637523372
YAL012W	18.9433888230533	23.7488958605565	7.84717886938166	5.52053615640436	9.85191715466644	14.2634376053849	29.4206203002166	26.0848144174357	31.2694067159858	32.5163117149225	31.6394309683302	17.5084422391852	6.02381102767285	5.92262042810362	10.2235136464071	18.6365688983029	25.4419326406736	30.6614301836714	32.257948816053	27.6620138664948	41.944436769096	22.5134567340792	6.06543687180781	7.94662719742309	6.70981979789421	9.30084767788406	10.0371798711232	6.09821408192646	8.11462952297431	4.85663579753413	26.9759702648187	23.3580305535281	6.82172006622685	12.2550910276509	6.5355343482375	12.1554096859896	15.0911729188472	41.0035186195758	23.8965770075551	23.3188878060553	32.2012193863092	38.1409153832081	2.78451004676635	9.44009429548238	6.45721602874593	3.32199089801956	7.89313088785648	4.37727436234786	2.90143638940826
YAL013W	51.4177696625733	53.4350156862521	48.0639705749626	35.8834850166283	49.9632941415227	59.3058721487057	53.6926320478954	52.1696288348714	53.7442927931005	51.0059791606627	39.5492887104128	59.5287036132296	58.5170214116792	58.5681353445802	51.1175682320355	74.5462755932117	60.7137028925165	34.5756553135018	48.7620156521732	48.6851444050309	54.5277677998248	63.2520927290798	54.5889318462703	66.2218933118591	61.3469238664614	61.1198561689524	54.3680576352504	60.3045614768283	54.7737492800766	63.1362653679437	65.7539275204955	64.964522477	52.0156155049797	50.3820408914537	58.8198091341375	69.1923320587102	56.3403788970294	46.8611641366581	56.857372880045	61.6284892017177	68.3056168800498	53.2761992654336	64.9719010912149	48.1444809069601	49.8966693130367	73.0837997564303	49.5114573874634	68.5772983434497	81.2402189034314
YAL014C	25.7088848312866	22.9007210083938	19.6179471734541	35.8834850166283	15.4815841001901	33.0311186651019	11.7682481200867	23.7134676522143	31.2694067159858	24.2278401013148	20.5656301294146	38.5185729262074	25.8163329757408	28.2969642676062	25.5587841160177	20.1896163064948	31.802415800842	23.4853507789824	15.7538819799329	25.4490527571752	26.215272980685	28.9458729438162	30.327184359039	23.8398815922693	26.8392791915768	22.5877729320041	20.9107913981732	25.0704356701421	19.272245117064	35.615329181917	28.6619684063698	25.5478459179214	28.9923102814641	29.9568891787022	25.0528816682438	21.5057248290586	22.1337202809759	16.5966622983997	16.4803979362449	31.6470620225037	24.3948631714464	20.5839860798266	31.5577805300187	22.6562263091577	28.1769426708913	14.3952938914181	21.5267206032449	36.4772863528988	26.1129275046744
YAL015C	24.35578562964	32.2306443821838	18.6370498147814	13.8013403910109	14.7778757319997	13.5127303629962	15.4458256576137	14.2280805913286	15.6347033579929	14.6642190086905	23.7295732262477	26.2626633587778	14.6292553529198	23.0324127759585	17.8911488812124	15.5304740819191	18.5032237386717	14.3521588093781	9.75240313043463	15.4907277652371	23.0694402230028	19.2972486292108	17.3298196337366	20.3080472823035	9.58545685413459	14.6156177795321	8.36431655926929	16.9394835609068	8.11462952297431	6.47551439671217	26.9759702648187	30.6574151015056	23.876020231794	21.7868284936016	15.2495801458875	18.7006302861379	16.097251113437	10.7390167813175	8.24019896812246	6.66253937315867	36.1043974937406	32.0868018303179	21.347910358542	22.6562263091577	9.97933386260734	5.53665149669926	14.35114706883	7.29545727057976	11.6057455576331
YAL016C-B	1.35309920164667	0.848174852162731	0.980897358672707	4.14040211730327	1.40741673638092	1.50141448477736	2.94206203002166	1.77851007391607	3.90867583949822	2.55029895803314	0	3.50168844783704	0.860544432524693	0.658068936455958	0	1.55304740819191	1.15645148366698	0	0.750184856187279	1.10648055465979	0	0	0	1.76591715498291	0	0	0	0.677579342436274	3.04298607111536	1.61887859917804	1.68599814155117	0.729938454797753	2.55814502483507	2.7233535617002	1.08925572470625	1.87006302861379	2.01215638917962	0	1.64803979362449	1.66563484328967	0.975794526857855	1.81623406586705	1.85634003117757	0.944009429548238	1.17403927795381	0	0.717557353441498	0	1.45071819470413
YAL016W	83.8921505020933	100.084632555202	76.5099939764712	59.3457636813469	83.0375874464743	78.0735532084227	77.9646437955741	68.7690561914214	83.0593615893372	80.9719919175521	90.1723782597411	89.2930554198445	63.6802880068273	77.652134501803	89.4557444060621	54.3566592867169	71.1217662455193	76.3273900316926	60.0147884949824	80.7730804901648	72.3541534266906	88.9817575680275	78.8506793335015	88.2958577491455	75.7251091476632	70.4207038468364	55.2044892911773	77.9216243801715	58.8310640415637	42.9002828782182	126.449860616337	121.169783496427	89.5350758692274	86.4664755839813	90.4082251506188	65.4522060014826	65.3950826483377	66.386649193599	75.8098305067267	79.950472477904	110.264781534938	96.2604054909538	59.4028809976822	85.9048580888896	62.8111013705286	54.2591846676528	58.8397029822029	37.9363778070148	33.366518478195
YAL017W	43.2991744526933	46.6496168689502	70.6246098244349	80.0477742678632	57.0003778234273	59.3058721487057	56.634694077917	73.5117497218643	71.3333340708425	65.6701981693533	55.3690041945779	68.2829247328222	75.727910062173	70.4133762007875	70.2866563190488	46.5914222457573	61.8701543761834	73.7179066118057	70.5173764816043	73.0277166075463	57.673600557507	76.1169251485536	67.5862965715727	57.3923075369446	47.9272842706729	57.1337785927164	65.2416691623005	50.1408713402842	64.9170361837945	60.7079474691766	62.3819312373932	56.205261019427	61.3954805960417	68.76467743293	59.9090648588438	51.4267332868792	64.3890044537479	53.6950839065874	61.8014922609185	76.6192027913247	56.5960825577556	52.0653765548555	44.5521607482616	50.9765091956048	41.6783943673601	37.649230177555	47.3587853271389	72.9545727057976	55.127291398757
YAL018C	16.23719041976	19.5080215997428	15.6943577387633	13.8013403910109	16.1852924683806	16.5155593325509	35.30474436026	29.6418345652678	389.890414989947	212.949962995767	37.9673171619963	84.0405227480889	31.8401440034137	20.4001370301347	15.3352704696106	31.0609481638382	41.0540276701778	41.0993638632191	398.348158635445	298.749749758144	27.2638838999124	22.5134567340792	17.3298196337366	19.425088704812	140.906215755778	19.9303878811801	2895.72639281903	651.153748081259	1005.19973215844	2320.66247192173	15.1739832739605	16.0586460055506	17.0543001655671	14.9784445893511	20.6958587694188	19.6356618004448	29.1762676431045	65.410374940752	165.627999259262	807.832898995488	19.5158905371571	22.4002201456937	20.4197403429533	17.9361791614165	68.0942781213207	2716.28122428066	1253.5726964623	2092.33714520227	1922.20160798297
YAL019W	23.0026864279933	11.0262730781155	14.7134603800906	9.66093827370763	7.0370836819046	15.7648520901623	6.61963956754874	11.2638971348018	17.589041277742	10.2011958321325	9.49182929049907	10.5050653435111	6.02381102767285	13.1613787291192	15.3352704696106	12.4243792655353	9.25161186933584	15.0045296643498	13.503327411371	13.2777666559175	20.972218384548	12.8648324194739	6.93192785349464	9.712544352406	9.58545685413459	11.9582327287081	86.1524605604737	21.6825389579608	31.4441894015254	58.2796295704096	16.8599814155117	13.1388921863596	10.2325800993403	9.53173746595069	3.26776717411875	10.2853466573758	12.0729383350777	8.7864682756234	11.5362785553714	23.3188878060553	12.6853288491521	14.5298725269364	3.71268006235514	12.2721225841271	9.39231422363044	62.0104967630318	27.9847367842184	58.3636581646381	56.5780095934611
YAL020C	20.2964880247	33.0788192343465	37.2740996295629	44.1642892512349	38.7039602504753	34.5325331498792	37.5112908827762	30.8275079478786	24.4292239968639	24.2278401013148	23.7295732262477	33.2660402544519	36.1428661660371	38.8260672509015	15.3352704696106	55.9097066949088	36.4282217355099	22.8329799240106	25.5062851103675	19.9166499838763	20.972218384548	31.0900116803951	21.6622745421707	25.6057987472522	23.005096449923	27.9025430336522	25.0929496778079	21.6825389579608	10.1432869037179	25.9020575868487	25.2899721232675	38.6867381042809	36.6667453559693	38.8077882542278	30.499160291775	34.5961660293551	24.1458766701555	35.1458731024936	19.7764775234939	23.3188878060553	26.3464522251621	29.6651564091619	43.6239907326729	40.5924054705742	26.4158837539606	24.3612665854768	19.3740485429205	14.5909145411595	30.4650820887868
YAL021C	31.1212816378733	23.7488958605565	30.4078181188539	16.5616084692131	21.8149594139043	24.0226317564377	14.7103101501083	23.1206309609089	14.6575343981183	20.4023916642651	25.3115447746642	19.2592864631037	24.9557885432161	24.3485506488704	29.3926017334204	26.4018059392625	32.3806415426754	28.0519467637845	24.0059153979929	31.5346958078041	32.5069384960494	30.0179423121057	32.9266573040995	25.6057987472522	22.0465507645096	37.2033907115362	22.5836547100271	20.3273802730882	26.3725459496665	19.4265431901365	23.6039739817163	24.8179074631236	22.1705902152373	24.5101820553018	28.3206488423625	29.9210084578206	18.1094075026166	14.6441137927057	18.1284377298694	23.3188878060553	22.4432741177307	19.9785747245376	27.8451004676635	20.7682074500612	31.6990605047527	17.7172847894376	13.6335897153885	16.0500059952755	11.6057455576331
YAL022C	18.9433888230533	12.722622782441	22.5606392494723	34.5033509775272	32.3705849367612	21.019802786883	23.5364962401733	18.9707741217714	23.4520550369893	18.4896674457402	17.4016870325816	21.0101306870222	24.0952441106914	25.0066195853264	33.2264193508231	40.3792326129897	9.25161186933584	21.5282382140672	24.0059153979929	16.043968042567	10.486109192274	19.2972486292108	16.4633286520498	22.9569230147778	14.3781852812019	11.9582327287081	21.7472230541002	21.6825389579608	23.3295598785511	24.2831789876707	13.4879851324093	14.5987690959551	33.2558853228559	28.5952123978521	19.6066030447125	25.2458508862862	18.1094075026166	20.5017593097879	23.8965770075551	14.990713589607	18.5400960102992	21.1893974351156	26.9169304520747	22.6562263091577	15.2625106133995	24.3612665854768	15.786261775713	29.181829082319	30.4650820887868
YAL023C	58.1832656708066	25.4452455648819	92.2043517152345	99.3696508152785	113.297047278664	106.600428419192	107.385264095791	96.6323806827732	100.648402867079	121.776775246082	47.4591464524953	52.5253267175556	92.9387987126669	88.8393064215543	88.1778052002612	96.2889393078985	115.645148366698	93.2890322609577	118.52920727759	102.902691583361	45.0902695267782	26.8017342072372	111.777336637601	84.7640234391797	88.1862030580382	90.3510917280166	99.5353670553046	83.3422591196616	44.6304623763587	46.9474793761633	53.9519405296373	38.6867381042809	81.8606407947222	89.8706675361065	116.550362543569	114.073844745441	110.668601404879	103.485070801787	88.1701289589104	126.588248090015	43.9107537086035	52.6707879101445	106.73955179271	87.7928769479861	72.7904352331359	81.9424421511491	73.9084074044743	51.0682008940583	42.0708276464198
YAL024C	5.41239680658666	2.54452455648819	5.88538415203624	4.14040211730327	10.5556255228569	15.7648520901623	8.09067058255958	11.2638971348018	5.86301375924733	7.65089687409941	3.16394309683302	7.00337689567408	13.7687109203951	11.8452408562072	16.6132096754115	10.8713318573434	12.1427405785033	11.0903045345194	12.0029576989965	10.511565269268	5.243054596137	3.21620810486846	10.397891780242	15.0102958173547	8.62691116872113	6.64346262706004	10.0371798711232	10.1636901365441	6.08597214223073	8.09439299589022	5.0579944246535	5.10956918358427	9.37986509106192	7.48922229467554	10.8925572470625	14.0254727146034	10.0607819458981	8.7864682756234	16.4803979362449	9.993809059738	8.78215074172069	3.02705677644509	3.71268006235514	11.3281131545789	9.97933386260734	9.96597269405867	9.32824559473948	5.83636581646381	7.25359097352066
YAL025C	60.8894640740999	27.1415952692074	2.94269207601812	2.76026807820218	3.5185418409523	3.7535362119434	4.41309304503249	5.33553022174821	4.88584479937278	0	42.7132318072458	31.5151960305333	2.58163329757408	3.29034468227979	6.38969602900444	1.55304740819191	5.20403167650141	1.30474170994346	2.25055456856184	2.76620138664948	55.5763787190522	40.7386359950005	5.19894589012098	0	1.91709137082692	6.64346262706004	5.01858993556158	4.06547605461764	17.2435877363204	5.66607509712315	26.9759702648187	40.8765534686742	2.55814502483507	3.40419195212525	7.62479007294375	5.61018908584137	0	4.88137126423522	2.47205969043674	4.996904529869	33.1770139131671	72.0439512793931	3.71268006235514	3.77603771819295	5.28317675079212	5.53665149669926	8.61068824129798	5.83636581646381	8.70430916822479
YAL026C	13.5309920164667	9.32992337379005	16.675255097436	27.6026807820218	19.7038343093329	26.2747534836038	16.9168566726246	33.7916914044053	25.4063929567384	28.6908632778728	12.6557723873321	5.25253267175556	19.792521948068	24.3485506488704	29.3926017334204	21.7426637146868	27.176609866174	36.532767878417	42.0103519464876	40.9397805224123	15.729163788411	20.3693179975003	21.6622745421707	16.7762129723376	31.6320076186441	23.9164654574162	159.758446282043	35.2341258066862	111.576155940897	142.461316727668	15.1739832739605	16.0586460055506	17.0543001655671	13.616767808501	21.785114494125	20.5706933147517	33.2005804214638	21.478033562635	32.1367759756776	31.6470620225037	19.5158905371571	10.8974043952023	25.0605904208972	14.1601414432236	24.6548248370299	93.0157451445476	46.6412279736974	122.56368214574	120.409610160443
YAL027W	13.5309920164667	18.6598467475801	10.7898709453998	16.5616084692131	11.9630422592378	9.75919415105283	11.7682481200867	13.6352439000232	14.6575343981183	8.28847161360769	6.32788619366604	15.7575980152667	13.7687109203951	15.793654474943	12.7793920580089	6.21218963276765	8.09516038566886	11.0903045345194	8.25203341806007	10.511565269268	16.7777747076384	12.8648324194739	8.6649098168683	11.4784615073889	10.544002539548	14.6156177795321	26.7658129896617	16.2619042184706	25.3582172592947	29.1398147852048	11.8019869908582	17.5185229151461	12.7907251241753	10.8934142468008	13.071068696475	8.41528362876205	13.0790165296675	8.7864682756234	13.1843183489959	16.6563484328967	7.80635621486284	16.3461065928035	11.1380401870654	12.2721225841271	5.87019638976903	23.2539362861369	13.6335897153885	24.8045547199712	29.0143638940826
YAL028W	12.17789281482	16.1153221910919	24.5224339668177	27.6026807820218	16.1852924683806	13.5127303629962	14.7103101501083	13.0424072087179	8.794520638871	10.2011958321325	18.9836585809981	26.2626633587778	23.2346996781667	17.1097923478549	16.6132096754115	15.5304740819191	20.2379009641722	18.2663839392085	11.2527728428092	13.2777666559175	9.4374982730466	12.8648324194739	17.3298196337366	17.6591715498291	15.3367309666153	21.2590804065921	12.5464748389039	19.6498009306519	23.3295598785511	11.3321501942463	16.8599814155117	27.7376612823146	21.3178752069589	20.4251517127515	19.6066030447125	13.0904412002965	10.0607819458981	12.6915652870116	15.6563780394327	3.33126968657933	13.66112337601	11.5028157504913	14.8507202494205	18.8801885909648	14.0884713354457	8.85864239471882	14.35114706883	16.0500059952755	15.9579001417455
YAL029C	13.5309920164667	22.052546156231	26.4842286841631	30.362948860224	45.7410439323799	21.7705100292717	41.1888684203033	43.8699151565964	42.0182652746059	38.254484370497	31.6394309683302	26.2626633587778	22.374155245642	24.3485506488704	25.5587841160177	34.1670429802221	41.0540276701778	35.2280261684735	34.5085033846149	35.9606180264432	30.4097166575946	12.8648324194739	29.4606933773522	25.6057987472522	31.6320076186441	27.9025430336522	46.840172731908	35.2341258066862	23.3295598785511	20.2359824897255	23.6039739817163	24.0879690083258	33.2558853228559	27.233535617002	23.9636259435375	28.0509454292068	32.194502226874	33.1933245967995	32.1367759756776	36.6439665523727	19.5158905371571	38.1409153832081	22.2760803741308	35.872358322833	26.4158837539606	45.400542272934	35.1603103186334	20.4272803576233	24.6622093099702
YAL030W	87.9514481070332	72.0948624338322	124.573964551434	117.311393323593	116.815589119616	108.10184290397	119.889027723383	91.8896871523303	115.305937265197	104.562257279359	88.5904067113246	92.7947438676815	143.710920231624	127.665373672456	118.848346139483	100.948081532474	119.114502817699	116.122012184968	123.030316414714	120.606380457917	84.9374844574194	70.7565783071062	140.371539033266	143.922248131107	137.072033014125	111.610172134609	225.000115444344	149.06745533598	105.490183798666	181.314403107941	92.7298977853142	81.7531069373483	108.294806051351	122.550910276509	117.639618268275	113.138813231134	127.771930712906	109.342716318869	118.658865140963	131.585152619884	83.9183293097755	75.0710080558382	135.512822275963	138.769386143591	132.66643840878	164.992214601638	140.641241274534	169.25460867745	203.100547258578
YAL031C	27.0619840329333	27.1415952692074	22.5606392494723	37.2636190557294	30.2594598321898	30.0282896955472	22.8009807326679	34.9773647870161	34.2009135956094	38.254484370497	23.7295732262477	14.0067537913482	30.1190551383643	34.8776536321658	31.9484801450222	27.9548533474544	39.8975761865108	33.9232844585301	38.2594276655513	36.5138583037731	17.8263856268658	28.9458729438162	37.2591122125337	27.3717159022351	47.9272842706729	26.5738505082402	41.8215827963465	48.7857126554117	38.544490234128	50.1852365745194	33.7199628310233	29.9274766467079	37.5194603642477	39.4886266446529	23.9636259435375	21.5057248290586	30.1823458376943	40.0272443667288	33.7848157693021	39.975236238952	33.1770139131671	23.0056315009827	25.0605904208972	19.824198020513	41.0913747283832	47.6152028716137	26.5496220773354	37.9363778070148	36.2679548676033
YAL032C	27.0619840329333	27.1415952692074	26.4842286841631	28.9828148211229	22.5186677820947	35.2832403922679	30.156135807722	28.4561611826571	27.3607308764875	28.0532885383645	23.7295732262477	36.7677287022889	23.2346996781667	32.2453778863419	30.6705409392213	37.2731377966059	29.489512833508	28.7043176187562	26.2564699665548	21.5763708158659	36.701382172959	38.5944972584216	29.4606933773522	20.3080472823035	38.3418274165384	35.8746981861242	20.9107913981732	24.3928563277059	21.3009024978076	25.9020575868487	21.9179758401652	29.1975381919101	28.9923102814641	23.1485052744517	22.8743702188313	36.4662290579689	26.1580330593351	34.1695988496465	28.0166764916164	38.3096013956623	19.5158905371571	29.6651564091619	30.6296105144299	29.2642923159954	26.4158837539606	35.4345695788753	26.5496220773354	21.8863718117393	30.4650820887868
YAL033W	6.76549600823333	4.24087426081366	4.90448679336354	13.8013403910109	9.14820878647598	20.2690955444943	8.09067058255958	15.4137539739393	10.7488585586201	10.2011958321325	9.49182929049907	8.75422111959259	11.187077622821	11.1871719197513	15.3352704696106	9.31828444915147	11.5645148366698	13.0474170994346	11.2527728428092	11.0648055465979	10.486109192274	6.43241620973693	6.93192785349464	9.712544352406	10.544002539548	5.31477010164803	13.3829064948309	10.1636901365441	10.1432869037179	10.5227108946573	5.0579944246535	5.10956918358427	9.37986509106192	8.85089907552564	8.71404579765001	12.1554096859896	18.1094075026166	16.5966622983997	14.0083382458082	8.32817421644833	7.80635621486284	7.87034761875723	9.28170015588784	10.3841037250306	9.39231422363044	4.42932119735941	8.61068824129798	11.6727316329276	2.90143638940826
YAL034C	83.8921505020933	134.859801493874	147.134603800906	157.335280457524	99.9265882830453	87.0820401170868	91.939438438177	82.99713678275	69.3789961510934	65.032623429845	98.0822360018237	127.811628346052	183.29596412776	162.543027304622	121.404224551084	93.1828444915147	74.0128949546867	87.4176945662121	69.0170067692297	68.0485541115772	115.347201115014	126.50418545816	166.366268483871	187.187218428188	82.4349289455574	119.582327287081	51.0223310115427	70.4682516133725	38.544490234128	53.4229937728754	170.285812296668	168.615783058281	171.39571666395	183.145527024338	106.747061021213	119.684033831283	102.619975848161	80.0544887334576	59.3294325704817	71.6222982614557	167.836658619551	101.103696333266	176.352302961869	134.993348425398	80.4216905398357	50.9371937696332	73.1908500510328	48.1500179858264	47.8737004252364
YAL034W-A	12.17789281482	12.722622782441	17.6561524561087	30.362948860224	23.9260845184756	33.7818259074906	25.0075272551841	23.1206309609089	20.5205481573657	19.7648169247568	14.2377439357486	7.00337689567408	24.0952441106914	23.6904817124145	33.2264193508231	26.4018059392625	30.0677385753415	27.3995759088127	16.5040668361201	18.8101694292165	13.6319419499562	10.7206936828949	39.8585851575942	34.4353845221667	26.8392791915768	39.8607757623602	41.8215827963465	27.7807530398872	24.3438885689229	26.7114968864377	5.0579944246535	5.83950763838202	23.0233052235156	22.4676668840266	32.6776717411875	16.8305672575241	28.1701894485147	19.5254850569409	10.7122586585592	13.3250787463173	7.80635621486284	12.1082271057804	35.2704605923738	31.1523111750918	25.2418444760068	33.2199089801956	19.3740485429205	46.6909265317105	33.366518478195
YAL035W	86.5983489053866	94.9955834422259	37.2740996295629	42.7841552121338	21.1112510457138	34.5325331498792	39.7178374052925	34.3845280957107	39.0867583949822	29.9660127568894	98.0822360018237	68.2829247328222	29.2585107058396	36.8518604415336	24.2808449102169	15.5304740819191	32.3806415426754	33.2709136035583	36.0088730969894	35.4073777491133	109.05553559965	97.5583125143434	33.7931482857864	34.4353845221667	47.9272842706729	39.8607757623602	25.9293813337348	37.9444431764313	38.544490234128	28.3303754856158	94.4158959268653	100.001568307292	28.1395952731858	39.4886266446529	40.3024618141313	31.7910714864344	33.2005804214638	38.0746958610347	30.4887361820531	36.6439665523727	106.361603427506	110.184866662601	41.7676507014953	35.872358322833	34.0471390606604	21.0392756874572	46.6412279736974	20.4272803576233	26.1129275046744
YAL036C	56.8301664691599	44.9532671646248	6.86628151070895	8.28080423460654	10.5556255228569	10.5099013934415	7.35515507505416	10.6710604434964	9.77168959874555	7.65089687409941	60.1149188398274	33.2660402544519	10.3265331902963	17.7678612843109	10.2235136464071	12.4243792655353	10.4080633530028	16.3092713742933	6.00147884949823	9.95832499193813	68.159709749781	36.4503585218426	6.06543687180781	7.06366861993164	19.1709137082692	5.31477010164803	11.710043182977	14.2291661911617	18.2579164266922	15.3793466921914	59.0099349542908	40.8765534686742	11.0852951076186	13.616767808501	7.62479007294375	14.9605042289103	13.0790165296675	10.7390167813175	12.3602984521837	4.996904529869	41.9591646548878	69.016894502948	7.42536012471027	13.2161320136753	24.6548248370299	5.53665149669926	15.786261775713	7.29545727057976	13.0564637523372
YAL037C-A	18.9433888230533	12.722622782441	29.4269207601812	20.7020105865163	14.0741673638092	10.5099013934415	5.88412406004333	8.89255036958036	9.77168959874555	9.56362109262426	26.8935163230807	14.0067537913482	12.9081664878704	27.6388953311502	5.11175682320355	3.10609481638382	11.5645148366698	13.0474170994346	9.00221827424735	7.19212360528865	15.729163788411	20.3693179975003	14.7303466886761	23.8398815922693	5.75127411248075	11.9582327287081	6.69145324741543	7.45337276679901	10.1432869037179	11.3321501942463	8.42999070775583	12.4089537315618	23.876020231794	8.85089907552564	11.9818129717688	10.2853466573758	9.0547037513083	4.88137126423522	8.24019896812246	3.33126968657933	9.75794526857855	18.1623406586705	13.9225502338318	27.3762734568989	11.7403927795381	6.64398179603912	13.6335897153885	11.6727316329276	5.80287277881653
YAL037C-B	8.11859520987999	11.0262730781155	2.94269207601812	2.76026807820218	1.40741673638092	1.50141448477736	2.94206203002166	2.37134676522143	2.93150687962367	0.637574739508284	1.58197154841651	8.75422111959259	3.44217773009877	3.29034468227979	0	1.55304740819191	1.15645148366698	1.9571125649152	0.750184856187279	2.21296110931958	5.243054596137	5.36034684144744	3.46596392674732	6.18071004244018	0	1.32869252541201	0.836431655926929	0.677579342436274	0	2.42831789876707	3.37199628310233	10.2191383671685	6.82172006622685	6.12754551382544	2.1785114494125	2.80509454292068	1.00607819458981	1.95254850569409	0.824019896812246	3.33126968657933	8.78215074172069	4.84329084231214	3.71268006235514	3.77603771819295	1.76105891693071	1.10733029933985	0.717557353441498	1.45909145411595	0
YAL037W	1.35309920164667	1.69634970432546	1.96179471734541	0	2.11112510457138	0.750707242388679	2.20654652251625	1.77851007391607	2.93150687962367	2.55029895803314	0	0	0.860544432524693	0.658068936455958	1.27793920580089	0	1.73467722550047	2.60948341988693	2.25055456856184	0.553240277329896	3.1458327576822	1.07206936828949	0.86649098168683	4.41479288745727	1.91709137082692	5.31477010164803	1.67286331185386	2.03273802730882	2.02865738074358	3.23775719835609	1.68599814155117	0.729938454797753	1.70543001655671	3.40419195212525	4.357022898825	2.80509454292068	1.00607819458981	0.976274252847044	0.824019896812246	0	1.95158905371571	1.81623406586705	0	0.944009429548238	1.17403927795381	1.10733029933985	0	1.45909145411595	0
YAL038W	722.554973679319	788.80261251134	606.194567659733	420.940881925832	308.224265267421	174.914787476562	211.82846616156	123.90286848282	144.621006061434	112.213154153458	854.264636144916	616.297166819319	413.061327611853	453.409497218155	204.470272928142	215.873589738676	160.168530487877	144.173958948753	138.784198394647	127.798504063206	549.472121675158	730.079239805141	251.282384689181	441.479288745727	124.61093910375	265.738505082402	89.4981871841814	140.258923884309	87.2322673719738	133.557484432189	947.530955551756	732.128270162146	449.380809362694	296.164699834896	266.867652553031	178.591019232617	154.936041966831	89.817231261928	126.899064109086	94.941186067511	490.824647009501	581.194901077457	245.965054131028	543.749431419785	115.055849239473	79.7277815524694	176.519108946609	96.3000359716528	178.438337948608
YAL039C	123.132027349847	93.2992337379005	58.8538415203624	73.1471040723578	54.1855443506654	52.5495069672075	45.6019614653358	41.498568391375	62.5388134319715	38.8920591100053	101.246179098657	115.555718778622	66.2619213044014	63.8326868362279	46.0058114088319	38.8261852047978	39.8975761865108	51.5372975427668	47.2616459397986	48.6851444050309	111.152757438104	112.567283670396	52.8559498828966	61.8071004244018	50.8029213269133	39.8607757623602	48.5130360437619	39.9771812037401	90.2752534430892	46.1380400765742	118.019869908582	85.4027992113371	62.24819560432	63.9988086999546	53.3735305106063	43.9464811724241	39.2370495890026	47.8374383895052	41.2009948406123	44.972140768821	85.8699183634912	146.509547979942	48.2648408106168	70.8007072161178	66.33321920439	49.8298634702934	53.8168015081124	58.3636581646381	65.2823187616859
YAL040C	59.5363648724533	59.3722396513912	18.6370498147814	26.2225467429207	14.7778757319997	14.2634376053849	19.1234031951408	11.8567338261071	9.77168959874555	19.7648169247568	53.7870326461614	22.7609749109407	18.0714330830186	20.4001370301347	33.2264193508231	9.31828444915147	15.0338692876707	24.7900924889258	16.5040668361201	14.9374874879072	42.9930476883234	53.6034684144744	17.3298196337366	21.1910058597949	8.62691116872113	7.97215515247205	10.0371798711232	6.77579342436274	6.08597214223073	9.71327159506826	70.811921945149	49.6358149262472	17.0543001655671	26.5526972265769	7.62479007294375	20.5706933147517	19.1154856972064	8.7864682756234	14.0083382458082	14.990713589607	36.1043974937406	60.5411355289018	11.1380401870654	31.1523111750918	12.327412418515	6.64398179603912	10.045802948181	10.2136401788117	13.0564637523372
YAL041W	17.5902896214067	27.1415952692074	15.6943577387633	12.4212063519098	13.3704589956187	18.767681059717	16.1813411651192	20.7492841956875	17.589041277742	19.7648169247568	4.74591464524953	19.2592864631037	18.0714330830186	18.4259302207668	12.7793920580089	17.083521490111	18.5032237386717	11.7426753894912	27.7568396789293	11.6180458239278	13.6319419499562	22.5134567340792	17.3298196337366	7.94662719742309	23.9636421353365	10.6295402032961	18.4014964303924	21.6825389579608	20.2865738074358	25.0926182872597	5.0579944246535	18.2484613699438	24.7287352400723	15.6592829797761	14.1603244211813	10.2853466573758	20.1215638917962	11.7152910341645	22.2485372139306	13.3250787463173	17.5643014834414	19.9785747245376	17.6352302961869	9.44009429548238	19.9586677252147	23.2539362861369	22.2442779566864	24.8045547199712	24.6622093099702
YAL042W	78.4797536955066	86.5138349205986	55.9111494443443	70.3868359941556	59.1115029279986	69.0650662997585	71.3450042280253	58.097995747925	61.561644472097	54.8314275977124	56.9509757429944	87.5422111959259	66.2619213044014	62.516548963316	51.1175682320355	88.523702266939	57.822574183349	52.1896683977386	54.7634945016714	53.6643069009999	71.3055425074632	68.6124395705272	69.3192785349464	62.6900590018933	55.5956497539806	53.1477010164803	51.0223310115427	48.1081333129754	35.5015041630126	45.3286007769852	92.7298977853142	87.5926145757304	58.8373355712066	66.7221622616548	55.5520419600188	57.9719538870275	46.2795969511313	66.386649193599	48.6171739119225	73.2879331047453	78.0635621486284	73.2547739899711	45.4803307638504	50.0324997660566	52.2447478689443	46.5078725722738	44.4885559133729	45.2318350775945	46.4229822305322
YAL043C	81.1859520987999	105.173681668179	82.3953781285074	115.931259284492	83.7412958146647	93.8384052985849	69.1384577055091	71.1404029566428	68.4018271912189	69.495646606403	99.6642075502402	78.7879900763334	86.914987684994	102.000685150673	93.2895620234648	85.4176074505551	62.4483801180169	71.7607940468905	81.0199644682262	70.8147554982267	78.645818942055	90.053826936317	84.9161162053093	74.1685205092822	78.6007462039036	73.0780888976605	221.654388820636	69.1130929284999	143.020345342422	198.31262839931	75.8699163698025	84.6728607565393	101.473085985124	94.6365362690819	75.1586450047313	66.3872375157895	65.3950826483377	68.3391976992931	54.3853131896083	86.6130118510627	99.5310417395012	96.8658168462428	79.8226213406355	81.1848109411484	70.4423566772283	148.38226011154	78.9313088785648	272.850101919683	213.255574621507
YAL044C	399.164264485766	371.500585247276	185.389600789142	157.335280457524	185.779009202281	185.424688870004	168.43305121874	187.336394452493	153.415526700305	149.830063784447	386.001057813629	420.202613740445	166.945619909791	167.807578796269	189.135002458531	183.259594166646	169.420142357213	150.045296643498	153.787895518392	141.629510996453	488.652688359969	528.530198566717	115.243300564348	178.357632653274	189.792045711865	276.368045285698	325.371914155575	289.326379220289	191.708122480268	380.43647080684	310.223658045415	354.02015057691	161.163136564609	153.869476236061	212.404866317719	178.591019232617	192.160935166654	187.444656546632	173.044178330572	201.54181603805	382.511454528279	422.577125991734	165.214262774804	228.450281950674	243.613150175415	289.013208127702	256.167975178615	408.545607152467	374.285294233666
YAL044W-A	51.4177696625733	43.2569174602993	83.3762754871801	78.6676402287621	67.5560033462841	72.8186025117019	63.9898491529712	50.9839554522607	50.8127859134769	57.3817265557456	64.860833485077	63.0303920610667	64.540832439352	67.7811004549636	47.2837506146328	74.5462755932117	54.3532197323481	52.8420392527103	66.7664522006679	50.8981055143504	51.3819350421426	58.9638152559218	64.1203326448254	78.5833133967395	51.7614670123268	83.7076291009565	66.9145324741543	60.9821408192646	62.8883788030509	77.7061727605461	62.3819312373932	48.1759380166517	68.2172006622685	63.3179703095296	82.7834350776751	54.2318278297999	71.4315518158766	77.1256659749165	65.9215917449797	49.96904529869	37.0801920205985	47.8274970678324	67.7564111379813	72.6887260752143	65.7461995654131	79.7277815524694	85.3893250595383	77.3318470681454	103.000991823993
YAL046C	17.5902896214067	13.5707976346037	25.5033313254904	16.5616084692131	19.0001259411424	30.0282896955472	20.5944342101516	27.2704878000464	13.6803654382438	21.0399664037734	20.5656301294146	24.5118191348593	21.5136108131173	14.4775166020311	29.3926017334204	35.720090388414	30.0677385753415	18.9187547941802	26.2564699665548	23.2360916478556	22.0208293037754	25.7296648389477	22.5287655238576	22.9569230147778	31.6320076186441	26.5738505082402	26.7658129896617	24.3928563277059	19.272245117064	26.7114968864377	16.8599814155117	13.8688306411573	30.6977402980208	23.8293436648767	29.4099045670688	28.0509454292068	23.1397984755657	28.3119533325643	37.9049152533633	36.6439665523727	25.3706576983042	29.0597450538728	26.9169304520747	30.2083017455436	31.6990605047527	18.8246150887775	29.4198514911014	32.1000119905509	37.7186730623074
YAL047C	6.76549600823333	11.0262730781155	13.7325630214179	11.0410723128087	9.14820878647598	16.5155593325509	18.3878876876354	15.4137539739393	7.81735167899644	12.7514947901657	7.90985774208256	12.2559095674296	15.4897997854445	21.0582059665906	15.3352704696106	20.1896163064948	8.09516038566886	16.3092713742933	8.25203341806007	8.29860415994844	9.4374982730466	11.7927630511844	18.1963106154234	14.1273372398633	16.2952766520288	14.6156177795321	9.20074821519622	5.42063473949019	12.1719442844615	7.2849536963012	6.74399256620467	10.9490768219663	15.3488701490104	21.7868284936016	11.9818129717688	14.0254727146034	15.0911729188472	16.5966622983997	9.88823876174696	13.3250787463173	14.6369179028678	10.2919930399133	15.7788902650093	17.9361791614165	16.4365498913533	6.64398179603912	7.17557353441498	13.1318230870436	5.80287277881653
YAL049C	116.366531341613	115.351779894131	156.943577387633	146.294208144716	152.001007529139	132.875181902796	125.037636275921	123.310031791514	100.648402867079	98.824084623784	112.319979937572	127.811628346052	119.615676120932	139.510614528663	115.01452852208	125.796840063545	116.223374108532	113.512528765081	105.025879866219	101.796211028701	99.618037326603	127.576254826449	149.902939831822	149.219999596056	134.196395957884	132.869252541201	92.8439138078891	109.09027413224	126.791086296474	88.2288836552034	109.589879200826	96.3518760333034	144.108836399042	155.231153016911	131.799942689456	136.514601088807	128.778008907496	136.678395398586	84.8740493716614	113.263169343697	116.119548696085	99.2874622673989	145.722692447439	157.649574734556	122.687104546173	105.196378437286	100.45802948181	75.8727556140295	73.9866279299107
YAL051W	32.47438083952	27.1415952692074	41.1976890642537	56.5854956031447	54.8892527188559	45.7931417857094	49.2795390028629	58.097995747925	55.6986307128496	51.0059791606627	25.3115447746642	22.7609749109407	45.6088549238088	40.8002740602694	44.727872203031	54.3566592867169	56.666122699682	50.8849266877951	51.012570220735	52.0045860690102	28.3124948191398	16.0810405243423	60.6543687180781	50.3286389170129	59.4298324956344	42.5181608131843	61.0595108826658	52.1736093675931	26.3725459496665	48.5663579753413	18.5459795570628	22.6280920987303	45.1938954387529	40.850303425503	51.1950190611938	59.8420169156413	49.2978315349008	53.6950839065874	57.6813927768572	54.965949828559	23.4190686445885	23.6110428562717	61.2592210288598	50.9765091956048	54.005806785875	45.400542272934	58.8397029822029	39.3954692611307	40.6201094517157
YAL053W	240.851657893106	254.452455648819	179.504216637105	179.417425083142	175.927092047615	177.166909203728	183.878876876354	172.515477169859	171.981736937922	159.393684877071	226.221931423561	253.872412468185	173.829975369988	169.123716669181	185.301184841129	191.024831207605	171.733045324547	185.925693666944	186.796029190633	205.805383166721	293.611057383672	255.152509652898	188.895034007729	206.612307133	142.823307126605	196.646493760977	89.4981871841814	163.974200869578	132.877058438704	118.987577039586	168.599814155117	194.163628976202	178.217436730177	171.571274387112	198.244541896538	169.240704089548	196.185247945013	165.966622983997	149.971621219829	139.913326836332	241.02124813389	262.143116840145	237.611523990729	188.801885909648	187.259264833632	122.913663226724	154.274830989922	106.513676150464	127.663201133964
YAL054C	1037.82708766299	1008.47989922149	2652.346457851	2695.40177836443	2402.46036900223	2832.41842553249	2279.36255775928	2923.27772482672	2397.97262753216	2744.12167884365	1143.76542950514	941.954192468163	3066.11981308548	2646.09519348941	2828.07946243736	2312.48759079776	2908.47548142245	2794.10437184393	2723.92121281601	2579.75941318931	1228.97199733451	1074.21350702607	3311.72853200706	2881.97679693211	3293.56297508064	2885.92016519488	2017.47315409575	3175.81437799881	861.165058125648	1856.04431395763	955.960946259512	908.773376223202	2690.31585111821	2522.50623652481	2647.9806667609	2851.84611863603	3008.17380182354	2541.24188016086	2781.89117163814	2460.14266353884	1158.26810338027	1286.49912998916	2982.21026008676	2613.01810098952	3346.59896180732	2301.03236202821	2179.22168240183	1238.76864454444	1270.82913856082
YAL055W	316.62521318532	229.007210083938	709.188790320367	692.827287628747	490.484732628751	683.894297816087	353.782959110105	601.729241674937	555.031969208747	654.789257475008	251.533476198225	285.387608498719	623.034169147878	662.017350074693	539.290344847974	703.530475910936	478.192688496296	676.508576605686	609.900288080258	697.082749435669	297.805501060582	303.395631225925	655.93367313693	678.995146090929	843.520203163844	684.276650587184	572.11925265402	743.982117995028	489.920757449574	604.651156792999	193.889786278384	187.594182883023	625.892816076314	637.945571828271	495.611354741344	742.415022359674	738.461394828922	536.950839065874	716.073290329842	597.96290874099	247.851809821895	381.409153832081	801.93889346871	784.471835954585	952.732874059513	810.565779116772	688.855059303838	433.350161872438	464.229822305322
YAL056W	24.35578562964	24.5970707127192	23.541536608145	30.362948860224	18.296417572952	22.5212172716604	25.0075272551841	17.7851007391607	17.589041277742	17.2145179667237	20.5656301294146	28.0135075826963	24.9557885432161	19.7420680936787	20.4470272928142	15.5304740819191	12.1427405785033	20.8758673590954	18.0044365484947	10.511565269268	19.9236074653206	23.5855261023687	13.8638557069893	26.4887573247436	13.4196395957884	17.2730028303561	13.3829064948309	14.906745533598	13.1862729748332	5.66607509712315	20.231977698614	27.7376612823146	19.6124451904022	18.3826365414763	17.4280915953	13.0904412002965	13.0790165296675	13.6678395398586	14.8323581426204	3.33126968657933	28.2980412788778	16.9515179480925	12.994380218243	23.6002357387059	16.4365498913533	13.2879635920782	12.1984750085055	18.9681889035074	11.6057455576331
YAL058W	12.17789281482	7.63357366946458	21.5797418907996	13.8013403910109	14.7778757319997	14.2634376053849	13.2392791350975	19.5636108130768	14.6575343981183	19.1272421852485	22.1476016778312	10.5050653435111	12.9081664878704	13.8194476655751	8.94557444060621	12.4243792655353	18.5032237386717	12.3950462444629	12.0029576989965	16.043968042567	8.3888873538192	5.36034684144744	11.2643827619288	15.0102958173547	23.005096449923	10.6295402032961	9.20074821519622	14.906745533598	8.11462952297431	8.09439299589022	8.42999070775583	6.56944609317978	13.6434401324537	17.0209597606262	9.80330152235626	14.9605042289103	23.1397984755657	22.454307815482	16.4803979362449	6.66253937315867	9.75794526857855	13.3190498163584	12.994380218243	15.1041508727718	14.0884713354457	16.6099544900978	11.480917655064	5.83636581646381	13.0564637523372
YAL059W	33.8274800411666	18.6598467475801	7.84717886938166	2.76026807820218	4.92595857733322	8.25777966627547	5.88412406004333	4.74269353044286	7.81735167899644	5.73817265557456	12.6557723873321	15.7575980152667	5.16326659514816	5.92262042810362	6.38969602900444	3.10609481638382	7.51693464383537	11.7426753894912	3.00073942474912	5.53240277329896	27.2638838999124	15.0089711560528	8.6649098168683	2.64887573247436	11.5025482249615	13.2869252541201	9.20074821519622	12.1964281638529	21.3009024978076	8.90383229547924	18.5459795570628	13.1388921863596	1.70543001655671	5.44670712340039	5.44627862353125	9.35031514306895	10.0607819458981	3.90509701138818	4.94411938087348	6.66253937315867	15.6127124297257	23.6110428562717	0.928170015588784	9.44009429548238	8.80529458465354	5.53665149669926	7.17557353441498	8.75454872469571	1.45071819470413
YAL060W	106.894836930087	107.718206224667	117.707683040725	102.129918893481	67.5560033462841	51.7987997248189	50.0150545103683	48.0197719957339	38.1095894351076	42.0799328075468	83.8444920660751	108.552341882948	106.707509633062	107.265236642321	70.2866563190488	82.3115126341713	39.8975761865108	47.6230724129364	45.0110913712368	38.1735791357628	98.5694264073756	115.783491775265	87.5155891503698	127.146035158769	55.5956497539806	79.7215515247205	29.2751079574425	52.8511887100293	32.4585180918972	63.9457046675327	111.275877342377	108.030891310067	97.2095109437326	102.125758563757	64.2660877576688	45.8165442010378	53.32214431326	41.9797928724229	51.0892336023593	36.6439665523727	95.6278636320697	67.80607179237	83.5353014029906	104.785046679854	38.7432961724756	26.5759271841565	48.0763426805804	55.4454752564062	82.6909370981355
YAL061W	39.2398768477533	90.7547091814123	136.344732855506	189.078363356849	80.2227539737124	57.0537504215396	55.1636630629062	43.2770784652911	49.8356169536023	33.1538864544308	52.2050610977449	75.2863016284963	160.061264449593	146.749372829679	98.4013188466683	90.0767496751309	38.1628989610103	40.4469930082474	39.7597973779258	37.067098581103	31.458327576822	58.9638152559218	139.50504805158	171.293964033342	60.3883781810479	70.4207038468364	199.070734110609	42.009919231049	154.177960936512	172.410570812462	74.1839182282513	147.447567869146	156.899561523218	194.719779661564	65.355343482375	67.3222690300964	43.2613623673619	53.6950839065874	47.7931540151103	78.2848376346143	91.7246855246383	36.9300926726301	107.667721808299	81.1848109411484	38.7432961724756	121.806332927384	73.9084074044743	255.341004470292	203.100547258578
YAL062W	178.60909461736	139.948850606851	585.595723127606	582.41656450066	643.18944852608	498.469608946083	517.067401776307	380.601155818039	487.607310977403	365.330325738247	181.926728067899	166.330201272259	506.860670757044	500.132391706528	471.559566940527	498.528218029604	471.832205336128	425.998168296541	418.603149752502	444.251942695907	178.263856268658	136.152809772765	547.622300426076	516.530767832501	216.631324903442	284.34020043817	150.557698066847	178.880946403176	127.805414986845	161.078420618215	160.169823447361	121.169783496427	525.272445099468	530.373106141113	490.165076117813	443.204937781468	420.540685338541	364.150296311947	363.392774494201	319.801889911616	162.957685985262	154.985306953989	369.411666204336	533.365327694754	179.628009526932	130.664975322103	187.282469248231	100.677310334001	159.579001417455
YAR002C-A	21.6495872263466	10.1780982259528	47.0830732162899	35.8834850166283	49.2595857733322	64.5608228454264	48.5440234953574	55.7266489827036	46.9041100739786	35.0666106729556	20.5656301294146	26.2626633587778	55.9353881141051	37.5099293779896	58.7852034668408	55.9097066949088	45.1016078630122	46.318330702993	35.2586882408021	30.4282152531443	15.729163788411	18.2251792609213	56.3219138096439	56.5093489594531	43.1345558436056	53.1477010164803	45.1673094200542	51.4960300251568	68.9743509452816	38.043647080684	16.8599814155117	16.0586460055506	34.1086003311343	38.1269498638028	54.4627862353125	48.6216387439585	48.2917533403109	47.8374383895052	39.5529550469878	36.6439665523727	21.4674795908728	23.0056315009827	60.331051013271	46.2564620478636	48.7226300350829	36.5418998782151	39.4656544392824	52.5272923481743	31.9158002834909
YAR002W	27.0619840329333	21.2043713040683	12.7516656627452	16.5616084692131	15.4815841001901	16.5155593325509	19.1234031951408	23.7134676522143	13.6803654382438	12.1139200506574	14.2377439357486	17.5084422391852	13.7687109203951	13.1613787291192	19.1690880870133	12.4243792655353	22.5508039315061	16.961642229265	18.754621404682	12.1712861012577	13.6319419499562	22.5134567340792	19.9292925787971	19.425088704812	25.8807335061634	14.6156177795321	21.7472230541002	10.8412694789804	13.1862729748332	12.9510287934243	23.6039739817163	23.3580305535281	11.0852951076186	10.2125758563757	13.071068696475	11.2203781716827	22.1337202809759	9.76274252847044	19.7764775234939	9.993809059738	23.4190686445885	32.0868018303179	15.7788902650093	20.7682074500612	18.7846284472609	17.7172847894376	20.091605896362	16.0500059952755	11.6057455576331
YAR003W	17.5902896214067	14.4189724867664	34.3314075535447	31.7430828993251	35.8891267777135	40.5381910889887	38.982321897787	34.9773647870161	29.3150687962367	31.8787369754142	22.1476016778312	22.7609749109407	40.4455883286606	23.6904817124145	28.1146625276195	43.4853274293735	28.9112870916745	31.3138010386431	23.2557305418057	34.3008971944536	25.1666620614576	22.5134567340792	28.5942023956654	34.4353845221667	23.9636421353365	30.5599280844762	102.881093679012	36.5892844915588	52.745091899333	88.2288836552034	16.8599814155117	17.5185229151461	38.372175372526	28.5952123978521	30.499160291775	25.2458508862862	43.2613623673619	15.6203880455527	28.0166764916164	26.6501574926347	23.4190686445885	23.0056315009827	35.2704605923738	36.8163677523813	28.1769426708913	64.2251573617115	60.2748176890859	135.695505232784	111.705300992218
YAR007C	55.4770672675133	27.9897701213701	128.497553986125	129.732599675502	132.297173219806	140.382254326683	99.2945935132311	106.710604434964	101.625571826954	108.387705716408	44.2952033556623	45.5219498218815	129.942209311229	115.820132816249	144.4071302555	144.433408961848	95.9854731443593	95.8985156808446	96.0236615919718	97.9235290873916	35.6527712537316	28.9458729438162	188.028543026042	188.953135583171	141.864761441192	156.785717998617	102.044662023085	151.777772705725	37.5301615437562	100.370473149039	53.9519405296373	48.1759380166517	155.194131506661	127.316779009484	167.745381604763	124.359191402817	126.765852518316	112.27153907741	98.8823876174696	113.263169343697	41.9591646548878	42.9842062255203	178.208642993047	151.985518157266	122.100084907196	98.5523966412469	101.893144188693	83.1682128846093	72.5359097352066
YAR008W	8.11859520987999	3.39269940865093	18.6370498147814	20.7020105865163	19.0001259411424	26.2747534836038	17.65237218013	11.8567338261071	9.77168959874555	14.0266442691823	4.74591464524953	12.2559095674296	20.6530663805926	20.4001370301347	26.8367233218186	32.6139955720301	17.3467722550047	13.6997879544064	16.5040668361201	13.8310069332474	10.486109192274	5.36034684144744	25.1282384689181	25.6057987472522	17.2538223374423	34.5460056607122	9.20074821519622	16.2619042184706	3.04298607111536	9.71327159506826	3.37199628310233	2.18981536439326	26.434165256629	28.5952123978521	31.5884160164813	15.8955357432172	24.1458766701555	10.7390167813175	18.1284377298694	23.3188878060553	2.92738358057356	10.2919930399133	38.0549706391402	21.7122168796095	22.8937659200992	12.1806332927384	12.1984750085055	10.2136401788117	5.80287277881653
YAR014C	32.47438083952	17.8116718954174	44.1403811402718	37.2636190557294	41.5187937232371	47.2945562704868	38.982321897787	32.6060180217946	27.3607308764875	34.4290359334473	25.3115447746642	33.2660402544519	33.561232868463	37.5099293779896	44.727872203031	34.1670429802221	42.7887048956783	33.9232844585301	27.7568396789293	35.4073777491133	31.458327576822	19.2972486292108	42.4580581026547	29.137633057218	23.005096449923	29.2312355590642	15.8922014626117	27.1031736974509	24.3438885689229	19.4265431901365	20.231977698614	25.5478459179214	36.6667453559693	32.6802427404024	46.8379961623688	44.8815126867309	42.2552841727721	38.0746958610347	40.3769749438001	13.3250787463173	25.3706576983042	30.2705677644509	28.7732704832523	44.3684431887672	21.7197266421454	17.7172847894376	12.916032361947	10.2136401788117	17.4086183364496
YAR015W	542.592779860313	497.878638219523	77.4908913351439	66.2464338768523	67.5560033462841	62.3087011182604	58.1057250929279	52.1696288348714	36.1552515153585	56.106577076729	446.115976653456	530.505799847311	64.540832439352	59.8842732174922	70.2866563190488	66.7810385522522	61.2919286343499	55.4515226725972	45.0110913712368	45.9189430183814	556.81239810975	568.196765193428	57.1884047913308	74.1685205092822	59.4298324956344	66.4346262706004	40.9851511404195	64.370037531446	21.3009024978076	55.0418723720535	382.721578132115	482.489318621315	57.9846205629282	59.2329399669793	53.3735305106063	46.7515757153447	60.3646916753887	47.8374383895052	51.0892336023593	53.3003149852693	583.525127060997	460.718041374942	76.1099412782803	84.0168392297931	75.7255334280204	50.9371937696332	57.4045882753199	53.9863838022902	42.0708276464198
YAR018C	21.6495872263466	28.8379449735329	13.7325630214179	6.90067019550545	11.9630422592378	13.5127303629962	9.56170159757041	13.0424072087179	8.794520638871	8.92604635311598	20.5656301294146	22.7609749109407	11.187077622821	13.8194476655751	12.7793920580089	13.9774266737272	9.25161186933584	3.91422512983039	7.50184856187279	9.40508471460823	26.215272980685	25.7296648389477	11.2643827619288	22.9569230147778	4.79272842706729	7.97215515247205	14.2193381507578	4.06547605461764	7.10030083260252	8.09439299589022	23.6039739817163	20.4382767343371	11.938010115897	11.5742526372258	3.26776717411875	11.2203781716827	8.04862555671849	8.7864682756234	7.41617907131022	18.3219832761863	31.2254248594513	23.6110428562717	9.28170015588784	18.8801885909648	5.87019638976903	5.53665149669926	10.7633603016225	7.29545727057976	8.70430916822479
YAR019C	13.5309920164667	27.1415952692074	29.4269207601812	23.4622786647185	44.333627195999	32.2804114227132	33.0981978377437	44.4627518479018	48.8584479937278	51.643553900171	37.9673171619963	28.0135075826963	21.5136108131173	38.1679983144455	25.5587841160177	26.4018059392625	35.8499959936764	43.0564764281343	51.7627550769223	55.3240277329896	13.6319419499562	25.7296648389477	30.327184359039	30.0205916347095	36.4247360457114	38.5320832369482	51.8587626674696	51.4960300251568	19.272245117064	58.2796295704096	26.9759702648187	21.8981536439326	34.1086003311343	36.7652730829527	25.0528816682438	37.4012605722758	36.2188150052332	41.0035186195758	41.2009948406123	59.962854358428	29.2738358057356	16.3461065928035	27.8451004676635	35.872358322833	33.4601194216835	71.9764694570904	48.0763426805804	49.6091094399424	44.9722640358281
YAR019W-A	10.8247936131733	12.722622782441	11.7707683040725	9.66093827370763	7.74079205009506	10.5099013934415	6.61963956754874	2.96418345652679	5.86301375924733	5.73817265557456	9.49182929049907	8.75422111959259	7.74489989272224	4.6064825551917	7.66763523480532	3.10609481638382	11.5645148366698	5.21896683977386	8.25203341806007	6.08564305062886	9.4374982730466	8.5765549463159	5.19894589012098	6.18071004244018	5.75127411248075	6.64346262706004	5.8550215914885	4.06547605461764	2.02865738074358	11.3321501942463	5.0579944246535	9.48919991237079	7.67443507450521	5.44670712340039	7.62479007294375	3.74012605722758	1.00607819458981	6.83391976992931	4.94411938087348	8.32817421644833	10.7337397954364	9.68658168462428	5.56902009353271	4.72004714774119	5.28317675079212	7.75131209537897	2.15267206032449	2.9181829082319	10.1550273629289
YAR020C	13.5309920164667	10.1780982259528	36.2932022708902	33.1232169384262	26.037209623047	29.2775824531585	25.7430427626896	23.7134676522143	23.4520550369893	21.6775411432817	11.0738008389156	8.75422111959259	37.8639550310865	43.4325498060932	21.7249664986151	26.4018059392625	19.6596752223387	24.1377216339541	21.0051759732438	17.7036888745567	10.486109192274	9.64862431460539	29.4606933773522	46.7968046070471	32.5905533040576	25.2451579828282	19.2379280863194	27.7807530398872	23.3295598785511	26.7114968864377	8.42999070775583	9.48919991237079	38.372175372526	30.6377275691272	41.3917175388375	31.7910714864344	23.1397984755657	14.6441137927057	23.0725571107429	24.984522649345	7.80635621486284	9.68658168462428	37.1268006235514	39.648396041026	30.5250212267989	21.0392756874572	18.656491189479	17.5090974493914	15.9579001417455
YAR023C	18.9433888230533	21.2043713040683	18.6370498147814	11.0410723128087	10.5556255228569	9.75919415105283	16.9168566726246	17.1922640478554	18.5662102376165	22.3151158827899	28.4754878714972	33.2660402544519	12.0476220553457	20.4001370301347	19.1690880870133	17.083521490111	16.7685465131712	23.4853507789824	18.754621404682	17.1504485972268	29.3611057383672	17.1531098926318	19.9292925787971	18.5421301273205	23.005096449923	23.9164654574162	15.0557698066847	25.7480150125784	11.1576155940897	10.5227108946573	25.2899721232675	29.9274766467079	15.3488701490104	8.85089907552564	18.5173473200063	12.1554096859896	15.0911729188472	11.7152910341645	21.4245173171184	14.990713589607	20.4916850640149	13.3190498163584	20.4197403429533	16.9921697318683	14.0884713354457	15.5026241907579	15.786261775713	16.0500059952755	13.0564637523372
YAR027W	36.53367844446	65.3094636165303	28.4460234015085	15.181474430112	19.7038343093329	20.2690955444943	16.9168566726246	13.0424072087179	25.4063929567384	11.4763453111491	50.6230895493284	50.7744824936371	27.5374218407902	28.9550332040621	25.5587841160177	20.1896163064948	17.9249979968382	15.6569005193216	15.7538819799329	21.5763708158659	47.187491365233	55.7476071510534	21.6622745421707	30.9035502122009	6.70981979789421	13.2869252541201	29.2751079574425	18.2946422457794	28.4012033304101	8.90383229547924	74.1839182282513	47.4459995618539	26.434165256629	23.8293436648767	20.6958587694188	13.0904412002965	14.0850947242574	16.5966622983997	14.8323581426204	14.990713589607	47.8139318160349	43.5896175808093	23.2042503897196	24.5442451682542	14.6754909744226	11.0733029933985	22.9618353101279	17.5090974493914	18.8593365311537
YAR028W	13.5309920164667	5.08904911297639	9.80897358672707	4.14040211730327	4.22225020914276	8.25777966627547	6.61963956754874	7.11404029566428	6.84018271912189	7.01332213459113	4.74591464524953	8.75422111959259	4.30272216262347	4.6064825551917	2.55587841160177	12.4243792655353	5.7822574183349	5.87133769474559	4.50110913712368	3.31944166397938	7.3402764345918	5.36034684144744	8.6649098168683	7.06366861993164	6.70981979789421	3.98607757623602	51.0223310115427	14.2291661911617	44.6304623763587	56.6607509712315	11.8019869908582	8.02932300277528	5.9690050579485	8.85089907552564	4.357022898825	1.87006302861379	4.02431277835925	4.88137126423522	7.41617907131022	11.6594439030277	8.78215074172069	6.05411355289018	6.49719010912149	7.5520754363859	8.80529458465354	37.649230177555	20.8091632498034	70.0363897975657	60.9301641775735
YAR029W	1.35309920164667	2.54452455648819	3.92358943469083	1.38013403910109	0	0	1.47103101501083	1.77851007391607	0.977168959874555	3.8254484370497	0	1.75084422391852	1.72108886504939	3.94841361873575	0	3.10609481638382	1.15645148366698	1.9571125649152	3.00073942474912	2.21296110931958	3.1458327576822	4.28827747315795	0	2.64887573247436	1.91709137082692	0	18.4014964303924	3.38789671218137	11.1576155940897	26.7114968864377	1.68599814155117	0.729938454797753	4.26357504139178	2.04251517127515	3.26776717411875	0	3.01823458376943	1.95254850569409	0.824019896812246	1.66563484328967	1.95158905371571	0.605411355289018	1.85634003117757	0.944009429548238	1.17403927795381	13.2879635920782	7.17557353441498	26.2636461740871	21.760772920562
YAR033W	10.8247936131733	9.32992337379005	18.6370498147814	4.14040211730327	10.5556255228569	14.2634376053849	13.9747946426029	18.3779374304661	13.6803654382438	22.3151158827899	4.74591464524953	8.75422111959259	15.4897997854445	15.793654474943	16.6132096754115	12.4243792655353	16.7685465131712	13.0474170994346	18.754621404682	18.8101694292165	6.2916655153644	3.21620810486846	10.397891780242	11.4784615073889	13.4196395957884	7.97215515247205	16.7286331185386	14.2291661911617	11.1576155940897	16.9982252913695	10.115988849307	15.3287075507528	17.0543001655671	10.8934142468008	9.80330152235626	16.8305672575241	18.1094075026166	19.5254850569409	29.6647162852409	18.3219832761863	15.6127124297257	6.05411355289018	12.994380218243	7.5520754363859	12.9144320574919	9.96597269405867	14.35114706883	23.3454632658552	8.70430916822479
YAR035C-A	12.17789281482	24.5970707127192	19.6179471734541	22.0821446256174	16.1852924683806	16.5155593325509	12.5037636275921	10.0782237521911	11.7260275184947	13.389069529674	14.2377439357486	15.7575980152667	19.792521948068	16.4517234113989	20.4470272928142	12.4243792655353	9.25161186933584	13.0474170994346	6.75166370568551	9.40508471460823	12.5833310307288	15.0089711560528	23.3952565055444	26.4887573247436	15.3367309666153	19.9303878811801	12.5464748389039	18.9722215882157	13.1862729748332	12.1415894938353	10.115988849307	7.29938454797753	23.0233052235156	19.7443133223264	6.5355343482375	14.0254727146034	18.1094075026166	2.92882275854113	14.8323581426204	6.66253937315867	13.66112337601	12.1082271057804	12.0662102026542	25.4882545978024	14.6754909744226	11.0733029933985	12.1984750085055	2.9181829082319	5.80287277881653
YAR035W	602.129144732766	757.420142981319	1094.68145227874	883.285785024697	811.3757485236	767.973508963619	700.210763145156	550.152449531371	501.287676415647	455.228364008915	727.706912271595	716.095287582674	962.088675562607	933.141751894548	766.763523480532	866.600453771087	509.416878555305	553.862855871001	466.614980548488	497.916249596906	636.506827971032	687.196465073562	1297.13699958518	1064.84804445469	591.422687900104	855.677986365333	429.089439490515	817.838266320582	318.499208776742	626.506017881903	770.501150688883	625.557255761674	923.49035396546	987.215666116322	743.961659974369	617.12079944255	618.738089672734	485.208303664981	491.115858500099	383.096013956623	862.602361742343	560.005503642341	757.386732720448	1248.92447529232	689.161056158884	599.06569194286	673.786354881567	402.709241336003	603.498768996919
YAR042W	87.9514481070332	90.7547091814123	80.433583411162	96.6093827370763	75.2967953963792	77.322845966034	80.1711903180903	87.7398303131928	73.2876719905916	87.3477393126349	90.1723782597411	71.7846131806593	93.7993431451916	75.0198587559792	75.3984131422523	71.4401807768279	75.1693464383537	71.1084231919188	78.7694098996643	96.2638082554019	95.4235936496934	96.4862431460539	85.7826071869961	82.9981062841967	79.5592918893171	82.3789365755445	117.936863485697	81.3095210923528	82.1606239201149	103.608230347395	64.0679293789443	79.5632915729551	81.8606407947222	78.9772532893057	66.4445992070813	90.6980568877688	76.4619427888257	76.1493917220694	68.3936514354164	66.6253937315867	106.361603427506	101.103696333266	68.68458115357	55.696556343346	69.8553370382514	130.664975322103	74.6259647579158	131.318230870436	118.958891965739
YBL001C	113.66033293832	145.037899719827	203.04575324525	162.855816613929	168.89000836571	160.651349871177	148.574132516094	113.824644730629	122.146119984319	124.327074204115	124.975752324904	117.306563002541	211.693930401075	180.310888588932	184.023245635328	180.153499350262	146.291112683873	112.86015791011	117.028837565216	115.627217961948	109.05553559965	109.351075565528	184.562579099295	167.762129723376	127.48657615999	112.938864660021	65.2416691623005	94.8611079410783	103.461526417922	89.0383229547924	171.971810438219	178.834921425449	197.829881920579	208.336547470065	135.067709863575	146.799947746182	156.948198356011	146.441137927057	122.778964625025	123.256978403435	154.175535243541	88.3900578721966	182.849493070991	208.626083930161	93.9231422363044	62.0104967630318	101.893144188693	56.9045667105221	85.5923734875438
YBL002W	112.307233736673	100.084632555202	167.733448333033	190.45849739595	562.262986184177	868.568279443702	408.946622173011	495.018637239973	358.621008273962	313.049197098568	107.574065292323	145.320070585237	195.343586183105	192.15612944514	782.098793950143	725.273139625623	442.34269250262	404.469930082474	277.568396789293	316.453438632701	123.736088468833	152.233850297107	759.046099957663	522.711477874941	586.629959473037	1096.17133346491	230.855137035832	576.620020413269	175.478863434319	236.356275479994	138.251847607196	91.2423068497191	183.333726779847	240.335951820042	718.908778306125	687.248163015568	617.732011478144	418.821654471382	318.895700066339	258.173400709898	121.974315857232	167.093534059769	1130.51107898714	523.925233399272	825.936632040502	313.374474713178	319.313022281467	191.14098048919	206.001983647987
YBL003C	112.307233736673	68.7021630251812	88.2807622805436	74.5272381114588	346.928225517897	451.925759917985	207.415373116527	219.942412474287	162.210047339176	109.662855195425	94.9182929049907	154.07429170483	86.0544432524694	65.8068936455958	361.656795241651	394.474041680746	183.297560161216	185.273322811972	114.028098140466	121.712861012577	141.562474095699	129.720393563028	380.389540960518	231.335147302761	285.646614253211	350.77482670877	94.516777119743	159.231145472524	69.9886796356534	50.1852365745194	104.531884776172	91.9722453045169	83.5660708112789	93.2748594882318	385.596526546013	405.803677209192	315.908553101201	219.661706890585	126.899064109086	99.93809059738	132.708055652668	125.925561900116	463.156837778803	219.954197084739	266.506916095514	91.9084148452078	110.503832429991	75.8727556140295	82.6909370981355
YBL004W	51.4177696625733	29.6861198256956	10.7898709453998	13.8013403910109	30.2594598321898	29.2775824531585	18.3878876876354	30.2346712565732	25.4063929567384	31.8787369754142	22.1476016778312	22.7609749109407	13.7687109203951	19.0839991572228	23.002905704416	24.8487585310706	22.5508039315061	31.9661718936149	19.5048062608693	22.1296110931958	35.6527712537316	20.3693179975003	21.6622745421707	20.3080472823035	31.6320076186441	22.5877729320041	20.0743597422463	17.6170629033431	44.6304623763587	11.3321501942463	8.42999070775583	13.8688306411573	18.7597301821238	17.7017981510513	23.9636259435375	27.1159139148999	23.1397984755657	18.5492108040938	26.3686366979919	13.3250787463173	32.2012193863092	35.113858606763	26.9169304520747	26.4322640273507	25.8288641149837	12.1806332927384	18.656491189479	37.9363778070148	23.2114911152661
YBL005W	6.76549600823333	13.5707976346037	18.6370498147814	12.4212063519098	16.1852924683806	13.5127303629962	18.3878876876354	8.89255036958036	9.77168959874555	14.6642190086905	12.6557723873321	5.25253267175556	12.9081664878704	15.793654474943	10.2235136464071	15.5304740819191	15.6120950295042	9.78556282457598	16.5040668361201	11.6180458239278	12.5833310307288	8.5765549463159	5.19894589012098	11.4784615073889	13.4196395957884	9.30084767788406	11.710043182977	7.45337276679901	4.05731476148715	8.09439299589022	15.1739832739605	7.29938454797753	12.7907251241753	9.53173746595069	11.9818129717688	8.41528362876205	14.0850947242574	16.5966622983997	13.1843183489959	6.66253937315867	10.7337397954364	4.23787948702312	9.28170015588784	11.3281131545789	10.5663535015842	6.64398179603912	11.480917655064	8.75454872469571	10.1550273629289
YBL006C	46.0053728559866	38.1678683473229	27.4651260428358	42.7841552121338	32.3705849367612	39.7874838466	47.808507987852	34.9773647870161	47.8812790338532	36.3417601519722	26.8935163230807	42.0202613740445	33.561232868463	38.1679983144455	39.6161153798275	17.083521490111	33.5370930263424	29.3566884737279	27.0066548227421	32.6411763624639	34.6041603345042	34.3062197852636	36.3926212308468	37.9672188321326	53.6785583831537	41.1894682877723	25.9293813337348	31.8462290945049	41.5874763052433	24.2831789876707	45.5219498218815	35.7669842850899	39.2248903808044	43.5736569872032	39.213206089425	47.6866072296516	43.2613623673619	36.1221473553406	33.7848157693021	31.6470620225037	42.9349591817456	39.3517380937862	38.9831406547289	32.0963206046401	39.3303158114525	34.3272392795354	39.4656544392824	37.9363778070148	27.5636456993785
YBL007C	93.3638449136199	116.199954746294	98.0897358672707	114.55112524539	92.8895046011407	114.107500843079	126.508667290932	125.08854186543	125.077626863943	155.568236440021	77.516605872409	108.552341882948	99.8231541728644	116.478201752705	107.346893287275	138.22121932908	126.053211719701	119.383866459827	131.282349832774	117.840179071268	95.4235936496934	103.99072872408	93.5810260221776	105.955029298975	76.6836548330767	94.3371693042526	78.6245756571313	100.959322023005	88.2465960623456	100.370473149039	126.449860616337	110.950645129258	106.589376034795	97.3598898307821	98.0330152235626	115.008876259748	104.63213223734	141.559766662821	107.946606482404	108.266264813828	113.192165115511	95.0495827803758	73.325431231514	81.1848109411484	81.0087101788126	63.1178270623716	52.3816868012294	67.1182068893338	62.3808823722777
YBL008W	6.76549600823333	5.08904911297639	6.86628151070895	9.66093827370763	11.9630422592378	12.7620231206075	13.9747946426029	14.8209172826339	7.81735167899644	12.1139200506574	4.74591464524953	3.50168844783704	5.16326659514816	9.21296511038341	12.7793920580089	15.5304740819191	15.6120950295042	11.0903045345194	12.7531425551838	12.7245263785876	5.243054596137	7.50448557802641	6.93192785349464	10.5955029298975	4.79272842706729	9.30084767788406	6.69145324741543	6.09821408192646	10.1432869037179	9.71327159506826	8.42999070775583	4.37963072878652	9.37986509106192	10.8934142468008	9.80330152235626	6.54522060014826	9.0547037513083	9.76274252847044	8.24019896812246	14.990713589607	3.90317810743142	4.23787948702312	6.49719010912149	11.3281131545789	9.39231422363044	13.2879635920782	5.74045882753199	11.6727316329276	11.6057455576331
YBL009W	14.8840912181133	7.63357366946458	19.6179471734541	22.0821446256174	28.1483347276184	31.5297041803245	21.3299497176571	29.6418345652678	32.2465756758603	24.8654148408231	18.9836585809981	15.7575980152667	23.2346996781667	23.0324127759585	30.6705409392213	43.4853274293735	34.1153187681759	22.8329799240106	29.2572093913039	33.1944166397938	18.8749965460932	8.5765549463159	39.8585851575942	36.2013016771496	14.3781852812019	31.8886206098882	121.282590109405	42.6874985734852	49.7021058282176	114.130941242052	8.42999070775583	10.9490768219663	28.9923102814641	27.233535617002	29.4099045670688	33.6611345150482	29.1762676431045	24.4068563211761	29.6647162852409	56.6315846718487	8.78215074172069	18.7677520139595	25.988760436486	23.6002357387059	22.3067462811223	97.4450663419071	45.9236706202559	121.104590691624	118.958891965739
YBL010C	6.76549600823333	9.32992337379005	19.6179471734541	9.66093827370763	20.4075426775233	18.767681059717	15.4458256576137	16.0065906652446	12.7031964783692	11.4763453111491	3.16394309683302	14.0067537913482	18.9319775155433	15.793654474943	17.8911488812124	20.1896163064948	11.5645148366698	11.7426753894912	12.7531425551838	16.043968042567	7.3402764345918	11.7927630511844	15.5968376703629	24.7228401697607	10.544002539548	11.9582327287081	82.806733936766	20.3273802730882	18.2579164266922	66.3740225662998	13.4879851324093	5.83950763838202	17.9070151738455	16.3401213702012	16.3388358705938	11.2203781716827	13.0790165296675	12.6915652870116	14.0083382458082	14.990713589607	13.66112337601	12.1082271057804	21.347910358542	18.8801885909648	15.8495302523764	84.1571027498288	22.9618353101279	71.4954812516816	79.7895007087273
YBL011W	9.47169441152666	23.7488958605565	23.541536608145	31.7430828993251	30.9631682003802	42.7903128161547	40.4533529127979	58.097995747925	44.9497721542295	54.1938528582042	28.4754878714972	22.7609749109407	30.1190551383643	30.92924001343	39.6161153798275	40.3792326129897	49.7274137976801	52.8420392527103	45.761276227424	51.4513457916803	20.972218384548	20.3693179975003	49.3899859561493	54.7434318044702	48.8858299560864	34.5460056607122	35.130129548931	60.9821408192646	28.4012033304101	50.9946758741084	26.9759702648187	29.1975381919101	36.6667453559693	25.1910204457268	40.3024618141313	47.6866072296516	39.2370495890026	41.0035186195758	48.6171739119225	43.3065059255313	32.2012193863092	27.2435109880058	34.342290576785	28.3202828864471	55.1798460638288	53.1518543683129	44.4885559133729	33.5591034446669	29.0143638940826
YBL014C	17.5902896214067	21.2043713040683	15.6943577387633	22.0821446256174	23.9260845184756	27.7761679683811	41.1888684203033	53.3553022174821	43.972603194355	42.717507547055	20.5656301294146	14.0067537913482	18.0714330830186	17.1097923478549	29.3926017334204	32.6139955720301	41.6322534120113	38.4898804433322	43.5107216588622	44.8124624637216	12.5833310307288	17.1531098926318	30.327184359039	28.2546744797265	47.9272842706729	34.5460056607122	30.1115396133695	56.2390854222107	21.3009024978076	49.3757972749303	16.8599814155117	13.1388921863596	18.7597301821238	14.9784445893511	27.2313931176563	34.5961660293551	35.2127368106434	26.3594048268702	42.0250147374246	39.975236238952	14.6369179028678	19.3731633692486	25.988760436486	23.6002357387059	62.2240817315517	52.0445240689731	46.6412279736974	30.640920536435	20.3100547258578
YBL015W	1255.67605912811	1486.85051584127	2014.76317471374	1969.45127379726	1788.12296357196	2293.41062549742	1387.18224715521	1838.97941642922	1557.60732204004	1706.78757766368	1850.90671164732	1369.16018310428	1943.10932864076	1860.36088336099	1812.11779382566	1708.3521490111	1492.97886541407	1812.93860596644	1565.63579486285	1695.68145001613	1460.71501048377	1634.90578664147	2319.59635797564	2369.86082198706	2022.5313962224	2666.6858985019	1435.31672157061	2652.72312563801	939.268367284276	2061.64189605324	1407.80844819522	1051.84131336356	1979.15153421407	1854.60377551783	2206.83209825486	1810.22101169815	1885.39053666131	1278.91927122963	1777.41091742402	1280.87319448975	2132.11104118441	1697.57344023041	2106.94593538654	2286.39083836583	2949.77368585894	2167.04539580809	2322.73315309013	1240.22773599856	1574.02924125398
YBL016W	70.3611584856266	79.7284361032968	118.688580399398	142.153806027412	101.334005019426	107.351135661581	122.831089753404	83.5899734740553	134.849316462689	138.991293212806	99.6642075502402	91.043899643763	124.778942716081	121.084684307896	107.346893287275	88.523702266939	102.345956304528	101.76985337559	144.035492387958	141.076270719123	47.187491365233	48.2431215730269	40.725076139281	59.1582246919275	35.466190360298	33.2173131353002	56.0409209471043	37.9444431764313	53.7594205897048	45.3286007769852	69.1259238035978	86.8626761209326	129.61268125831	130.720970961609	88.2297137012063	110.333718688214	101.613897653571	105.437619307481	121.1309248314	164.897849485677	36.1043974937406	47.8274970678324	54.7620309197383	66.0806600683766	34.0471390606604	42.0785513749144	45.9236706202559	49.6091094399424	71.0851915405025
YBL017C	112.307233736673	120.440829007108	72.5864045417803	80.0477742678632	103.445130123998	113.356793600691	82.3777368406066	99.0037274479946	66.4474892714697	90.5356130101763	124.975752324904	141.8183821374	90.3571654150928	82.2586170569947	99.6792580524692	104.054176348858	74.0128949546867	90.6795488410708	105.025879866219	97.3702888100617	108.006924680422	138.296948509344	99.6464628939854	98.0084021015515	81.476383260144	98.3232468804886	66.9145324741543	75.2113070104264	79.1176378489995	74.46841556219	173.65780857977	134.308675682787	90.3877908775058	89.1898291456815	89.3189694259126	91.6330884020757	85.516646540134	74.1968432163753	82.4019896812246	88.2786466943523	135.635439233242	92.0225260039307	85.3916414341682	70.8007072161178	83.3567887347202	78.6204512531295	73.1908500510328	102.136401788117	76.888064319319
YBL018C	10.8247936131733	11.0262730781155	21.5797418907996	13.8013403910109	26.037209623047	27.7761679683811	24.2720117476787	22.5277942696036	18.5662102376165	17.852092706232	11.0738008389156	15.7575980152667	18.9319775155433	15.135585538487	23.002905704416	20.1896163064948	11.5645148366698	16.3092713742933	13.503327411371	18.8101694292165	16.7777747076384	20.3693179975003	18.1963106154234	20.3080472823035	12.461093910375	26.5738505082402	5.8550215914885	21.6825389579608	15.2149303555768	8.09439299589022	10.115988849307	10.2191383671685	21.3178752069589	17.7017981510513	21.785114494125	17.765598771831	19.1154856972064	16.5966622983997	18.1284377298694	11.6594439030277	15.6127124297257	14.5298725269364	38.0549706391402	10.3841037250306	12.9144320574919	9.96597269405867	15.0687044222715	10.2136401788117	10.1550273629289
YBL019W	5.41239680658666	6.78539881730185	10.7898709453998	9.66093827370763	10.5556255228569	9.75919415105283	11.0327326125812	8.89255036958036	7.81735167899644	3.8254484370497	4.74591464524953	8.75422111959259	11.187077622821	7.23875830101554	6.38969602900444	7.76523704095956	9.82983761116933	9.78556282457598	5.25129399331096	8.85184443727834	4.1944436769096	7.50448557802641	9.53140079855513	13.2443786623718	2.87563705624038	7.97215515247205	2.50929496778079	9.48611079410783	2.02865738074358	6.47551439671217	5.0579944246535	13.1388921863596	7.67443507450521	12.9359294180759	8.71404579765001	9.35031514306895	9.0547037513083	8.7864682756234	11.5362785553714	3.33126968657933	6.83056168800498	12.1082271057804	12.0662102026542	11.3281131545789	7.63125530669973	2.21466059867971	5.74045882753199	7.29545727057976	7.25359097352066
YBL020W	16.23719041976	4.24087426081366	9.80897358672707	13.8013403910109	9.85191715466644	16.5155593325509	4.41309304503249	13.0424072087179	14.6575343981183	16.5769432272154	9.49182929049907	10.5050653435111	16.3503442179692	13.1613787291192	8.94557444060621	9.31828444915147	9.82983761116933	9.13319196960425	10.5025879866219	13.2777666559175	4.1944436769096	7.50448557802641	6.06543687180781	17.6591715498291	14.3781852812019	13.2869252541201	21.7472230541002	18.9722215882157	11.1576155940897	12.1415894938353	6.74399256620467	6.56944609317978	8.52715008278356	10.2125758563757	18.5173473200063	20.5706933147517	16.097251113437	11.7152910341645	10.7122586585592	9.993809059738	6.83056168800498	9.08117032933527	19.4915703273645	18.8801885909648	18.197608808284	16.6099544900978	15.0687044222715	17.5090974493914	13.0564637523372
YBL021C	21.6495872263466	15.2671473389292	22.5606392494723	5.52053615640436	18.296417572952	24.0226317564377	19.8589187026462	24.3063043435196	18.5662102376165	30.6035874963976	23.7295732262477	35.0168844783704	13.7687109203951	21.0582059665906	21.7249664986151	23.2957111228787	26.0201583825071	26.0948341988693	25.5062851103675	19.9166499838763	20.972218384548	23.5855261023687	24.2617474872312	15.0102958173547	28.7563705624038	31.8886206098882	51.0223310115427	48.1081333129754	36.5158328533844	57.4701902708206	13.4879851324093	17.5185229151461	18.7597301821238	23.8293436648767	25.0528816682438	19.6356618004448	25.1519548647453	24.4068563211761	24.7205969043674	33.3126968657933	22.4432741177307	26.0326882774278	27.8451004676635	24.5442451682542	33.4601194216835	64.2251573617115	43.7709985599314	84.6273043387252	62.3808823722777
YBL022C	50.0646704609266	39.8642180516484	52.9684573683262	53.8252275249425	55.5929610870463	57.8044576639283	50.7505700178737	53.3553022174821	59.6073065523479	52.2811286396793	52.2050610977449	36.7677287022889	48.1904882213828	45.4067566154611	56.229325055239	49.6975170621412	47.9927365721797	51.5372975427668	58.5144187826078	60.3031902289587	41.944436769096	38.5944972584216	57.1884047913308	59.1582246919275	59.4298324956344	53.1477010164803	103.717525334939	52.8511887100293	68.9743509452816	72.0400976634229	53.9519405296373	40.8765534686742	52.8683305132581	58.5521015765542	47.927251887075	51.4267332868792	50.3039097294906	44.908615630964	48.6171739119225	56.6315846718487	64.4024387726184	50.2491424889885	57.5465409665046	55.696556343346	52.2447478689443	71.9764694570904	59.5572603356444	103.595493242233	79.7895007087273
YBL023C	14.8840912181133	16.1153221910919	17.6561524561087	26.2225467429207	19.0001259411424	17.2662665749396	16.1813411651192	19.5636108130768	7.81735167899644	16.5769432272154	12.6557723873321	15.7575980152667	19.792521948068	18.4259302207668	20.4470272928142	12.4243792655353	9.82983761116933	21.5282382140672	20.2549911170565	19.3634097065464	20.972218384548	23.5855261023687	26.8612204322917	24.7228401697607	20.1294593936826	26.5738505082402	12.5464748389039	16.9394835609068	5.07164345185894	11.3321501942463	15.1739832739605	16.0586460055506	22.1705902152373	13.616767808501	25.0528816682438	19.6356618004448	17.1033293080268	12.6915652870116	17.3044178330572	11.6594439030277	19.5158905371571	17.5569293033815	21.347910358542	18.8801885909648	13.5014516964688	14.3952938914181	14.35114706883	5.83636581646381	7.25359097352066
YBL024W	37.8867776461066	17.8116718954174	11.7707683040725	11.0410723128087	9.85191715466644	18.0169738173283	14.7103101501083	25.4919777261304	20.5205481573657	27.4157137988562	18.9836585809981	17.5084422391852	12.9081664878704	11.1871719197513	17.8911488812124	9.31828444915147	21.9725781896726	24.1377216339541	26.2564699665548	18.8101694292165	25.1666620614576	21.4413873657898	12.1308737436156	4.41479288745727	14.3781852812019	21.2590804065921	15.8922014626117	12.1964281638529	7.10030083260252	11.3321501942463	28.6619684063698	16.0586460055506	10.2325800993403	12.2550910276509	19.6066030447125	26.1808824005931	22.1337202809759	20.5017593097879	22.2485372139306	14.990713589607	17.5643014834414	23.6110428562717	14.8507202494205	12.2721225841271	15.8495302523764	17.7172847894376	14.35114706883	11.6727316329276	13.0564637523372
YBL025W	5.41239680658666	15.2671473389292	11.7707683040725	13.8013403910109	11.2593338910474	14.2634376053849	13.2392791350975	17.7851007391607	22.4748860771148	15.9393684877071	15.8197154841651	5.25253267175556	14.6292553529198	9.21296511038341	7.66763523480532	13.9774266737272	10.9862890948363	11.7426753894912	13.503327411371	14.3842472105773	15.729163788411	7.50448557802641	18.1963106154234	8.82958577491455	7.66836548330767	21.2590804065921	10.0371798711232	14.906745533598	11.1576155940897	15.3793466921914	18.5459795570628	16.0586460055506	10.2325800993403	10.8934142468008	13.071068696475	16.8305672575241	16.097251113437	13.6678395398586	9.06421886493471	6.66253937315867	13.66112337601	12.1082271057804	15.7788902650093	5.66405657728943	14.0884713354457	14.3952938914181	15.786261775713	16.0500059952755	13.0564637523372
YBL026W	82.5390513004466	66.1576384686931	57.8729441616897	63.4861657986501	62.6300447689509	52.5495069672075	61.0477871229495	69.3618928827268	67.4246582313443	56.106577076729	60.1149188398274	89.2930554198445	58.5170214116792	58.5681353445802	57.5072642610399	71.4401807768279	67.0741860526849	60.6704895123711	63.0155279197315	58.643469396969	92.2777608920112	78.2610638851326	60.6543687180781	46.7968046070471	62.3054695518748	93.0084767788406	106.22682030272	76.5664656952989	125.776757606102	96.3232766510936	72.4979200867002	67.1543378413933	51.1629004967014	45.6161721584783	62.0875763082563	54.2318278297999	89.5409593184932	77.1256659749165	59.3294325704817	84.947377007773	76.1119730949127	70.227717213526	54.7620309197383	54.7525469137978	75.1385137890435	90.8010845458679	65.2977191631763	192.600071943306	137.818228496893
YBL027W	123.132027349847	89.0583594770868	101.032427943289	107.650455049885	140.037965269902	139.631547084294	195.647124996441	181.408027539439	223.771691811273	230.164480962491	96.5002644534072	99.7981207633556	94.6598875777163	98.7103404683937	117.570406933682	156.857788227383	181.562882935716	170.921164002594	182.294920053509	222.402591486618	111.152757438104	77.1889945168431	66.7198055898859	67.1048518893506	61.3469238664614	85.0363216263685	101.208230367158	91.4732112288969	128.819743677217	72.0400976634229	101.15988849307	100.73150676209	86.124215836114	113.019172810558	118.728873992981	151.475105317717	150.911729188472	233.329546430444	221.661352242494	228.191973530684	80.0151512023441	124.714739189538	74.2536012471028	84.9608486593414	79.8346709008588	83.049772450489	119.114520671289	75.8727556140295	104.451710018697
YBL028C	27.0619840329333	17.8116718954174	9.80897358672707	4.14040211730327	7.0370836819046	10.5099013934415	10.2972171050758	8.299713678275	6.84018271912189	7.01332213459113	23.7295732262477	12.2559095674296	9.46598875777163	6.58068936455958	8.94557444060621	7.76523704095956	6.93870890200188	9.78556282457598	4.50110913712368	5.53240277329896	32.5069384960494	19.2972486292108	7.79841883518147	1.76591715498291	5.75127411248075	6.64346262706004	5.01858993556158	7.45337276679901	28.4012033304101	1.61887859917804	13.4879851324093	21.8981536439326	4.26357504139178	8.17006068510059	8.71404579765001	10.2853466573758	10.0607819458981	7.81019402277635	4.12009948406123	4.996904529869	17.5643014834414	38.1409153832081	12.994380218243	7.5520754363859	6.45721602874593	2.21466059867971	6.45801618097348	11.6727316329276	2.90143638940826
YBL029C-A	64.9487616790399	83.9693103641104	87.2998649218709	78.6676402287621	58.4077945598082	51.0480924824302	67.6674266904983	51.5767921435661	50.8127859134769	38.254484370497	80.6805489692421	92.7947438676815	111.010231795685	71.7295140736994	70.2866563190488	62.1218963276765	46.8362850885127	50.2325558328234	45.761276227424	45.9189430183814	88.0833172151016	106.134867460659	79.7171703151883	82.9981062841967	88.1862030580382	58.4624711181284	65.2416691623005	55.5615060797744	61.8740501126791	46.9474793761633	99.4738903515188	109.490768219663	64.8063406291551	93.9556978786568	58.8198091341375	73.8674896302447	51.3099879240804	49.7899868951992	60.153452467294	58.2972195151383	113.192165115511	71.4385399241041	75.1817712626915	78.3527826525037	54.5928264248519	78.6204512531295	53.8168015081124	59.822749618754	60.9301641775735
YBL029W	58.1832656708066	85.6656600684359	61.7965335963805	57.9656296422458	61.22262803257	47.2945562704868	62.5188181379603	51.5767921435661	62.5388134319715	45.9053812445965	87.0084351629081	87.5422111959259	55.9353881141051	58.5681353445802	57.5072642610399	40.3792326129897	62.4483801180169	50.2325558328234	47.2616459397986	56.4305082876494	117.444422953469	99.7024512509223	67.5862965715727	57.3923075369446	55.5956497539806	75.7354739484845	81.1338706249121	44.0426572583578	116.647799392756	73.658976262601	82.6139089360072	81.7531069373483	45.1938954387529	57.1904247957041	50.1057633364875	57.9719538870275	51.3099879240804	62.4815521822108	46.1451142214858	41.6408710822417	92.7004800514962	59.9357241736128	49.1930108262056	68.9126883570214	69.8553370382514	57.5811755656723	72.4732926975913	109.431859058696	85.5923734875438
YBL030C	339.627899613313	207.802838779869	130.45934870347	103.510052932582	180.149342256758	207.945906141664	217.712590221603	196.821781513379	233.543381410019	207.211790340192	264.189248585557	222.357216437652	156.619086719494	146.091303893223	185.301184841129	203.44921047314	222.03868486406	205.496819316096	229.556565993307	201.379460948082	291.513835545217	317.332533013688	176.764160264113	135.092662356193	390.128093963278	272.381967709462	286.896057982937	363.182527545843	249.52485783146	203.978703496433	229.295747250959	210.952213436551	133.876256299702	148.422769112661	204.780076244775	196.356618004448	206.246029890911	240.163466200373	241.437829765988	236.520147747133	239.069659080174	397.755260424885	175.42413294628	185.969857621003	459.636377318915	324.447777706577	376.717610556787	178.009157402146	181.339774338016
YBL031W	23.0026864279933	16.9634970432546	18.6370498147814	17.9417425083142	21.1112510457138	20.2690955444943	9.56170159757041	20.1564475043821	15.6347033579929	25.5029895803314	18.9836585809981	19.2592864631037	11.187077622821	22.3743438395026	19.1690880870133	12.4243792655353	18.5032237386717	25.4424633438976	16.5040668361201	20.4698902612062	34.6041603345042	38.5944972584216	13.8638557069893	16.7762129723376	48.8858299560864	30.5599280844762	27.6022446455887	24.3928563277059	31.4441894015254	22.6643003884926	16.8599814155117	18.2484613699438	17.9070151738455	11.5742526372258	25.0528816682438	28.0509454292068	27.1641112539249	19.5254850569409	33.7848157693021	21.6532529627657	18.5400960102992	37.5355040279191	21.347910358542	21.7122168796095	48.135610396106	44.2932119735941	30.1374088445429	24.8045547199712	24.6622093099702
YBL032W	16.23719041976	16.9634970432546	45.1212784989445	63.4861657986501	61.22262803257	67.5636518149811	86.0553143781337	122.717195100209	85.0136995090863	128.790097380673	23.7295732262477	26.2626633587778	67.9830101694508	54.6197217258445	74.1204739364514	79.2054178177875	129.522566170702	93.9414031159294	103.525510153845	113.414256852629	33.5555494152768	33.2341504169741	58.0548957730176	42.3820117195898	68.0567436643556	75.7354739484845	94.516777119743	88.7628938591518	64.9170361837945	110.083744744107	23.6039739817163	29.1975381919101	46.8993254553096	56.5095864052791	59.9090648588438	100.983403545145	102.619975848161	94.6986025261633	110.418666172841	94.941186067511	23.4190686445885	28.4543336985838	54.7620309197383	49.0884903365084	78.073611983928	66.4398179603912	60.9923750425273	142.990962503363	82.6909370981355
YBL033C	48.71157125928	45.8014420167875	39.2358943469083	71.7669700332567	58.4077945598082	63.0594083606491	53.6926320478954	72.3260763392535	60.5844755122224	86.7101645731266	52.2050610977449	56.0270151653926	57.6564769791545	54.6197217258445	70.2866563190488	41.9322800211816	79.7951523730216	65.8894563521449	69.767191625417	83.5392818768143	56.6249896382796	61.1079539925008	57.1884047913308	48.56272176203	62.3054695518748	79.7215515247205	67.7509641300813	78.5992037226077	72.017337016397	74.46841556219	64.0679293789443	47.4459995618539	62.24819560432	67.4030006520799	54.4627862353125	63.5821429728688	90.547037513083	77.1256659749165	74.1617907131022	81.6161073211937	57.5718770846134	70.227717213526	55.6902009353271	41.5364149001225	54.005806785875	52.0445240689731	52.3816868012294	77.3318470681454	63.8316005669818
YBL034C	20.2964880247	17.8116718954174	33.350510194872	67.6265679159534	51.3707108779036	64.5608228454264	69.1384577055091	66.9905461175053	58.6301375924733	63.7574739508284	22.1476016778312	10.5050653435111	47.3299437888581	43.4325498060932	63.8969602900444	65.2279911440603	71.1217662455193	61.9752312223145	75.0184856187279	58.643469396969	19.9236074653206	17.1531098926318	51.122967919523	61.8071004244018	59.4298324956344	70.4207038468364	51.0223310115427	56.916664764647	22.3152311881793	56.6607509712315	32.0339646894722	16.7885844603483	51.1629004967014	42.8928185967781	74.069389280025	58.9069854013344	63.3829262591581	59.5527294236697	64.2735519513552	51.6346801419797	20.4916850640149	16.9515179480925	72.3972612159252	51.9205186251531	69.8553370382514	58.6885058650122	43.0534412064899	59.822749618754	37.7186730623074
YBL035C	35.1805792428133	36.4715186429975	58.8538415203624	55.2053615640436	55.5929610870463	56.3030431791509	30.156135807722	35.5702014783214	28.3378998363621	24.2278401013148	37.9673171619963	26.2626633587778	49.9115770864322	45.4067566154611	42.1719937914293	51.2505644703331	26.5983841243405	33.2709136035583	38.2594276655513	28.2152541438247	26.215272980685	11.7927630511844	69.3192785349464	53.8604732269787	43.1345558436056	51.8190084910683	45.1673094200542	41.3323398886127	27.3868746400383	57.4701902708206	16.8599814155117	14.5987690959551	39.2248903808044	46.2970105489034	35.9454389153063	32.7261030007413	28.1701894485147	33.1933245967995	29.6647162852409	31.6470620225037	32.2012193863092	28.4543336985838	78.8944513250467	63.2486317797319	42.265414006337	60.9031664636919	44.4885559133729	43.7727436234786	44.9722640358281
YBL036C	24.35578562964	38.1678683473229	40.216791705581	46.9245573294371	41.5187937232371	34.5325331498792	33.8337133452491	34.9773647870161	35.178082555484	33.7914611939391	14.2377439357486	35.0168844783704	31.8401440034137	31.587308949886	34.5043585566239	38.8261852047978	38.1628989610103	32.6185427485866	35.2586882408021	32.6411763624639	44.0416586075508	36.4503585218426	39.8585851575942	50.3286389170129	31.6320076186441	39.8607757623602	46.840172731908	33.8789671218137	39.5588189244997	46.1380400765742	37.0919591141257	35.0370458302921	35.814030347691	37.4461114733777	35.9454389153063	43.0114496581172	38.2309713944128	48.8137126423522	35.4328555629266	49.96904529869	24.3948631714464	37.5355040279191	49.1930108262056	41.5364149001225	44.0264729232677	44.2932119735941	37.3129823789579	36.4772863528988	42.0708276464198
YBL037W	28.41508323458	21.2043713040683	30.4078181188539	13.8013403910109	25.3335012548566	26.2747534836038	25.0075272551841	30.8275079478786	17.589041277742	26.1405643198397	17.4016870325816	7.00337689567408	16.3503442179692	18.4259302207668	26.8367233218186	38.8261852047978	28.333061349841	33.2709136035583	21.0051759732438	22.1296110931958	10.486109192274	16.0810405243423	18.1963106154234	22.9569230147778	19.1709137082692	26.5738505082402	12.5464748389039	23.7152769852696	17.2435877363204	25.0926182872597	5.0579944246535	11.679015276764	25.5814502483507	25.1910204457268	26.14213739295	26.1808824005931	20.1215638917962	28.3119533325643	29.6647162852409	23.3188878060553	23.4190686445885	20.5839860798266	10.2098701714766	31.1523111750918	22.8937659200992	21.0392756874572	24.3969500170109	20.4272803576233	26.1129275046744
YBL038W	47.3584720576333	45.8014420167875	35.3123049122174	35.8834850166283	30.2594598321898	33.0311186651019	30.156135807722	27.2704878000464	31.2694067159858	29.9660127568894	72.7706912271595	63.0303920610667	32.7006884359384	30.2711710769741	31.9484801450222	27.9548533474544	37.5846732191768	33.9232844585301	39.7597973779258	33.1944166397938	52.43054596137	53.6034684144744	26.8612204322917	30.9035502122009	39.3003731019518	29.2312355590642	66.0781008182274	25.7480150125784	78.1033091586277	59.8985081695876	59.0099349542908	40.8765534686742	40.0776053890827	40.850303425503	38.1239503647188	38.3362920865827	34.2066586160536	41.0035186195758	50.265213705547	41.6408710822417	65.3782332994763	58.7249014630347	46.4085007794392	41.5364149001225	40.5043550894063	62.0104967630318	45.9236706202559	126.940956508088	104.451710018697
YBL039C	32.47438083952	14.4189724867664	0	2.76026807820218	2.81483347276184	0	0.735515507505416	2.96418345652679	0	1.91272421852485	18.9836585809981	10.5050653435111	0	0	2.55587841160177	3.10609481638382	1.15645148366698	2.60948341988693	1.50036971237456	4.97916249596906	19.9236074653206	16.0810405243423	0.86649098168683	0.882958577491455	0.958545685413459	2.65738505082402	2.50929496778079	2.03273802730882	4.05731476148715	0.809439299589022	15.1739832739605	11.679015276764	0	1.3616767808501	3.26776717411875	0	0	1.95254850569409	1.64803979362449	0	18.5400960102992	24.2164542115607	2.78451004676635	2.83202828864471	2.34807855590761	2.21466059867971	3.58778676720749	1.45909145411595	0
YBL039W-B	28.41508323458	44.9532671646248	39.2358943469083	46.9245573294371	35.8891267777135	24.7733389988264	32.3626823302383	39.1272216261536	37.1324204752331	43.3550822865633	53.7870326461614	29.7643518066148	49.0510326539075	32.9034468227979	38.3381761740266	41.9322800211816	38.7411247028438	43.708847283106	39.0096125217385	40.3865402450824	45.0902695267782	55.7476071510534	46.7905130110888	47.6797631845386	34.5076446748845	25.2451579828282	25.9293813337348	28.4583323823235	118.676456773499	29.9492540847938	45.5219498218815	50.365753381045	56.2791905463715	50.3820408914537	41.3917175388375	34.5961660293551	39.2370495890026	50.7662611480463	38.7289351501756	41.6408710822417	43.9107537086035	35.113858606763	40.8394806859065	38.7043866114777	34.6341586996373	18.8246150887775	25.1145073704524	48.1500179858264	24.6622093099702
YBL040C	58.1832656708066	50.0423162776012	69.6437124657622	91.0888465806719	96.408046442093	93.8384052985849	80.1711903180903	80.0329533262232	72.3105030307171	84.1598656150935	71.188719678743	61.2795478371482	86.914987684994	88.1812374850983	74.1204739364514	93.1828444915147	74.0128949546867	86.7653237112404	76.5188553311025	82.4328013221545	76.5485971036002	57.8917458876323	97.0469899489249	108.603905031449	101.605842653827	102.309324456725	56.8773526030312	78.5992037226077	60.8597214223073	56.6607509712315	37.0919591141257	51.0956918358427	76.7443507450521	98.7215666116322	96.9437594988563	101.918435059452	109.662523210289	72.2442947106813	79.1059100939757	61.6284892017177	50.7413153966084	65.9898377265029	90.9606615277009	95.344952384372	126.209222380034	73.0837997564303	79.6488662320063	39.3954692611307	36.2679548676033
YBL041W	143.428515374547	178.116718954174	127.516656627452	106.270321010784	92.1857962329502	98.342648752917	107.385264095791	100.189400830605	105.534247666452	123.051924725099	161.361097938484	173.333578167933	108.428598498111	141.484821338031	127.793920580089	77.6523704095956	115.066922624865	110.250674490223	120.779761846152	116.733698516608	153.0971942072	145.80143408737	131.706629216398	144.805206708599	170.621132003596	114.267557185433	153.903424690555	140.936503226745	49.7021058282176	136.795241630545	182.087799287526	235.040182444876	133.876256299702	137.52935486586	111.104083920038	109.398687173907	95.5774284860321	123.986830111575	110.418666172841	109.931899657118	182.473576522419	123.50391647896	131.800142213607	136.881367284494	145.580870466272	161.670223703619	132.748110386677	96.3000359716528	103.000991823993
YBL042C	148.840912181133	83.9693103641104	26.4842286841631	11.0410723128087	16.1852924683806	18.0169738173283	11.0327326125812	18.3779374304661	14.6575343981183	22.3151158827899	74.352662775576	89.2930554198445	24.0952441106914	25.0066195853264	16.6132096754115	21.7426637146868	12.7209663203368	18.9187547941802	16.5040668361201	23.2360916478556	96.4722045689208	86.8376188314485	26.8612204322917	16.7762129723376	17.2538223374423	11.9582327287081	77.7881440012044	33.2013877793774	153.16363224614	110.893184043696	69.1259238035978	73.723783934573	27.2868802649074	25.8718588361519	11.9818129717688	8.41528362876205	15.0911729188472	13.6678395398586	14.8323581426204	18.3219832761863	60.499260665187	139.850023071763	17.6352302961869	17.9361791614165	19.9586677252147	56.4738452663325	35.8778676720749	150.286419773943	123.311046549851
YBL043W	20.2964880247	27.9897701213701	22.5606392494723	11.0410723128087	19.0001259411424	19.5183883021057	20.5944342101516	27.2704878000464	26.383561916613	29.3284380173811	17.4016870325816	22.7609749109407	11.187077622821	14.4775166020311	8.94557444060621	10.8713318573434	32.3806415426754	15.6569005193216	32.257948816053	23.7893319251855	16.7777747076384	35.3782891535531	19.9292925787971	14.1273372398633	30.6734619332307	35.8746981861242	35.130129548931	49.463291997848	16.2292590459486	39.6625256798621	18.5459795570628	28.4675997371124	18.7597301821238	13.616767808501	13.071068696475	23.3757878576724	16.097251113437	22.454307815482	28.8406963884286	33.3126968657933	25.3706576983042	41.7733835149422	18.5634003117757	13.2161320136753	38.1562765334987	36.5418998782151	41.6183264996069	23.3454632658552	18.8593365311537
YBL045C	358.571288436366	280.745876065864	406.091506490501	391.958067104709	380.002518822848	496.217487218917	439.102757980733	513.989411361744	506.173521215019	524.724010615318	363.853456135798	365.92644279897	374.336828148242	377.073500589264	483.061019792735	422.4288950282	462.002367724959	506.239783458064	534.88180246153	535.536588455339	364.916599891135	378.440487006189	418.515144154739	414.107572843492	632.640152372883	635.11502714694	572.955684309946	828.679535799563	383.416244960536	771.395652508338	293.363676629903	320.442981656214	423.799359114343	367.652730829527	489.075820393107	431.049528095478	575.476727305372	520.354176767474	538.084992618397	614.619257173887	361.043974937406	422.577125991734	458.515987700859	392.707922692067	739.05772547192	793.955824626674	758.458122587664	612.8184107287	606.400205386327
YBL046W	47.3584720576333	33.0788192343465	43.1594837815991	64.8662998377512	57.7040861916177	80.3256749355887	66.1963956754874	85.9613202392768	71.3333340708425	83.5222908755852	52.2050610977449	33.2660402544519	54.2142992490557	44.7486876790051	85.6219267886594	83.8645600423632	67.6524117945183	73.065535756834	76.5188553311025	96.8170485327318	40.8958258498686	38.5944972584216	61.5208596997649	52.9775146494873	65.1811066081152	57.1337785927164	63.5688058504466	66.4027755587548	52.745091899333	53.4229937728754	40.463955397228	50.365753381045	71.6280606953819	68.76467743293	58.8198091341375	76.6725841731654	102.619975848161	85.9121342505399	59.3294325704817	74.953567948035	45.8623427623192	48.4329084231214	69.6127511691588	53.8085374842495	59.2889835366672	55.3665149669926	45.9236706202559	61.28184107287	58.0287277881653
YBL047C	55.4770672675133	77.1839115468086	76.5099939764712	115.931259284492	71.7782535554269	64.5608228454264	83.113252348112	69.3618928827268	58.6301375924733	72.0459455644361	85.4264636144916	75.2863016284963	93.7993431451916	105.291029832953	86.8998659944603	66.7810385522522	70.5435405036858	71.1084231919188	67.5166370568551	69.155034666237	60.8194333151892	70.7565783071062	69.3192785349464	88.2958577491455	81.476383260144	55.8050860673044	40.1487194844926	52.1736093675931	27.3868746400383	56.6607509712315	70.811921945149	89.0524914853259	89.5350758692274	81.7006068510059	79.5156679035563	73.8674896302447	77.4680209834155	73.2205689635283	64.2735519513552	48.3034104554003	80.0151512023441	65.3844263712139	82.6071313874018	84.0168392297931	46.9615711181522	52.0445240689731	45.9236706202559	35.0181948987828	40.6201094517157
YBL050W	64.9487616790399	61.0685893557167	81.4144807698347	88.3285785024697	58.4077945598082	60.0565793910943	46.3374769728412	48.0197719957339	52.767123833226	49.0932549421379	72.7706912271595	82.2896785241704	80.0306322247965	86.8650996121864	62.6190210842435	52.803611878525	53.7749939905146	41.0993638632191	52.5129399331096	39.8332999677525	70.2569315882358	57.8917458876323	64.9868236265122	89.1788163266369	48.8858299560864	77.0641664738965	160.59487793797	75.2113070104264	112.590484631268	136.795241630545	97.7878922099677	67.884276296191	82.7133558030006	78.2964148988807	82.7834350776751	58.9069854013344	70.4254736212868	47.8374383895052	63.449532054543	49.96904529869	87.8215074172069	72.0439512793931	75.1817712626915	89.6808958070826	76.3125530669973	128.450314723423	75.3435221113573	189.681889035074	165.381874196271
YBL051C	44.65227365434	45.8014420167875	59.8347388790351	46.9245573294371	51.3707108779036	56.3030431791509	33.0981978377437	56.3194856740089	51.7899548733514	63.1198992113201	47.4591464524953	42.0202613740445	66.2619213044014	71.0714451372434	53.6734466436373	31.0609481638382	60.7137028925165	56.7562643825407	51.7627550769223	64.1758721702679	33.5555494152768	43.954844099869	53.7224408645834	60.0411832694189	36.4247360457114	42.5181608131843	71.9331224097159	42.009919231049	145.049002723166	73.658976262601	30.347966547921	42.3364303782697	46.8993254553096	48.3395257201785	57.7305534094313	53.296796315493	64.3890044537479	43.932341378117	37.0808953565511	51.6346801419797	53.668698977182	37.5355040279191	45.4803307638504	49.0884903365084	47.5485907571291	49.8298634702934	43.0534412064899	185.304614672726	127.663201133964
YBL052C	12.17789281482	22.9007210083938	22.5606392494723	19.3218765474153	20.4075426775233	28.5268752107698	29.4206203002166	24.3063043435196	19.5433791974911	19.7648169247568	14.2377439357486	24.5118191348593	18.0714330830186	25.0066195853264	21.7249664986151	20.1896163064948	32.9588672845089	20.2234965041237	15.7538819799329	21.5763708158659	17.8263856268658	13.9369017877633	14.7303466886761	12.3614200848804	12.461093910375	14.6156177795321	24.2565180218809	15.5843248760343	30.4298607111536	21.8548610889036	23.6039739817163	23.3580305535281	23.876020231794	19.7443133223264	19.6066030447125	19.6356618004448	17.1033293080268	17.5729365512468	16.4803979362449	14.990713589607	15.6127124297257	21.1893974351156	16.7070602805981	20.7682074500612	22.8937659200992	14.3952938914181	19.3740485429205	55.4454752564062	26.1129275046744
YBL054W	90.6576465103266	86.5138349205986	20.5988445321268	28.9828148211229	17.5927092047615	23.2719245140491	23.5364962401733	32.6060180217946	29.3150687962367	26.7781390593479	77.516605872409	75.2863016284963	19.792521948068	19.0839991572228	25.5587841160177	21.7426637146868	29.489512833508	23.4853507789824	20.2549911170565	29.3217346984845	103.812481003513	77.1889945168431	19.9292925787971	15.8932543948462	18.2123680228557	34.5460056607122	25.0929496778079	29.1359117247598	16.2292590459486	29.1398147852048	72.4979200867002	75.9135992989663	19.6124451904022	23.8293436648767	37.0346946400125	29.9210084578206	19.1154856972064	35.1458731024936	18.9524576266817	36.6439665523727	47.8139318160349	83.5467670298844	13.9225502338318	11.3281131545789	26.4158837539606	14.3952938914181	27.2671794307769	17.5090974493914	26.1129275046744
YBL055C	47.3584720576333	47.497791721113	21.5797418907996	17.9417425083142	24.6297928866661	17.2662665749396	19.1234031951408	17.7851007391607	22.4748860771148	27.4157137988562	45.8771749040788	29.7643518066148	13.7687109203951	15.135585538487	24.2808449102169	13.9774266737272	27.7548356080075	25.4424633438976	23.2557305418057	26.0022930345051	40.8958258498686	50.3872603096059	14.7303466886761	20.3080472823035	20.1294593936826	18.6016953557681	15.8922014626117	26.4255943550147	18.2579164266922	14.5699073926024	50.579944246535	36.4969227398876	18.7597301821238	19.7443133223264	10.8925572470625	10.2853466573758	20.1215638917962	20.5017593097879	23.0725571107429	24.984522649345	28.2980412788778	33.297624540896	10.2098701714766	17.9361791614165	18.197608808284	23.2539362861369	19.3740485429205	18.9681889035074	23.2114911152661
YBL056W	48.71157125928	53.4350156862521	62.7774309550532	55.2053615640436	61.9263364007605	66.8129445725925	56.634694077917	82.99713678275	82.0821926294626	72.0459455644361	49.0411180009118	49.0236382697185	60.2381102767285	64.4907557726839	85.6219267886594	54.3566592867169	65.9177345690179	69.8036814819753	69.0170067692297	69.155034666237	48.2361022844604	61.1079539925008	77.9841883518147	64.4559761568762	134.196395957884	83.7076291009565	153.903424690555	102.314480707877	112.590484631268	127.891409335065	50.579944246535	54.7453841098315	73.3334907119387	66.0413238712298	57.7305534094313	92.5681199163826	81.4923337617747	62.4815521822108	74.9858106099144	88.2786466943523	45.8623427623192	51.4599651995665	72.3972612159252	82.1288203706967	120.339025990265	156.133572206919	90.4122265336288	126.940956508088	101.550273629289
YBL057C	40.5929760494	27.1415952692074	17.6561524561087	34.5033509775272	19.7038343093329	29.2775824531585	31.6271668227329	36.1630381696268	25.4063929567384	19.1272421852485	20.5656301294146	38.5185729262074	19.792521948068	28.9550332040621	23.002905704416	35.720090388414	26.5983841243405	18.9187547941802	24.7561002541802	24.8958124798453	28.3124948191398	24.6575954706582	28.5942023956654	18.5421301273205	29.7149162478172	35.8746981861242	89.4981871841814	33.2013877793774	83.1749526104866	80.1344906593132	28.6619684063698	29.1975381919101	28.9923102814641	23.1485052744517	25.0528816682438	19.6356618004448	23.1397984755657	21.478033562635	25.5446168011796	34.978331709083	39.0317810743142	24.8218655668497	34.342290576785	31.1523111750918	26.4158837539606	70.8691391577506	47.3587853271389	124.022773599856	105.902428213402
YBL058W	100.129340921853	106.021856520341	109.860504171343	132.492867753705	64.0374615053318	64.5608228454264	72.0805197355308	80.6257900175285	78.1735167899644	61.8447497323036	99.6642075502402	115.555718778622	112.731320660735	103.974891960041	83.0660483770577	91.6297970833228	74.0128949546867	83.5034694363817	68.2668219130424	71.3679957755566	104.86109192274	108.279006197238	78.8506793335015	109.48686360894	114.066936564202	100.980631931313	68.5873957860082	86.730155831843	42.6018049956151	58.2796295704096	106.217882917724	111.680583584056	120.232816167248	106.210788906308	90.4082251506188	73.8674896302447	97.5895848752117	80.0544887334576	77.4578703003511	74.953567948035	106.361603427506	101.709107688555	130.871972198019	112.33712211624	103.902476098912	69.7618088584107	73.9084074044743	45.2318350775945	49.3244186199405
YBL059C-A	50.0646704609266	39.8642180516484	30.4078181188539	19.3218765474153	30.9631682003802	28.5268752107698	35.30474436026	30.8275079478786	32.2465756758603	40.1672085890219	47.4591464524953	36.7677287022889	24.0952441106914	25.0066195853264	29.3926017334204	32.6139955720301	31.802415800842	30.0090593286997	28.5070245351166	26.0022930345051	37.7499930921864	50.3872603096059	29.4606933773522	32.6694673671838	42.1760101581922	39.8607757623602	37.6394245167118	46.0753952856666	21.3009024978076	36.424768481506	35.4059609725745	21.8981536439326	33.2558853228559	27.233535617002	33.7669274658938	34.5961660293551	25.1519548647453	32.2170503439525	30.4887361820531	34.978331709083	45.8623427623192	67.200660437081	32.4859505456075	42.4804243296707	35.8081979775911	49.8298634702934	56.6870309218784	48.1500179858264	44.9722640358281
YBL059W	25.7088848312866	27.1415952692074	26.4842286841631	34.5033509775272	19.7038343093329	35.2832403922679	30.156135807722	23.7134676522143	24.4292239968639	28.0532885383645	15.8197154841651	40.2694171501259	20.6530663805926	23.6904817124145	20.4470272928142	23.2957111228787	24.2854811570066	25.4424633438976	23.2557305418057	23.7893319251855	31.458327576822	48.2431215730269	33.7931482857864	24.7228401697607	18.2123680228557	29.2312355590642	22.5836547100271	31.1686497520686	21.3009024978076	45.3286007769852	21.9179758401652	16.0586460055506	21.3178752069589	14.9784445893511	31.5884160164813	22.4407563433655	21.127642086386	36.1221473553406	29.6647162852409	38.3096013956623	27.3222467520199	31.4813904750289	27.8451004676635	20.7682074500612	31.6990605047527	36.5418998782151	34.4427529651919	39.3954692611307	39.1693912570116
YBL060W	24.35578562964	22.052546156231	26.4842286841631	28.9828148211229	24.6297928866661	20.2690955444943	17.65237218013	16.59942735655	11.7260275184947	19.7648169247568	37.9673171619963	26.2626633587778	23.2346996781667	15.135585538487	20.4470272928142	15.5304740819191	21.9725781896726	16.961642229265	19.5048062608693	14.9374874879072	20.972218384548	23.5855261023687	14.7303466886761	27.3717159022351	14.3781852812019	21.2590804065921	25.9293813337348	18.2946422457794	21.3009024978076	21.8548610889036	21.9179758401652	20.4382767343371	27.2868802649074	14.9784445893511	14.1603244211813	17.765598771831	10.0607819458981	16.5966622983997	11.5362785553714	19.987618119476	26.3464522251621	29.0597450538728	28.7732704832523	23.6002357387059	22.3067462811223	22.1466059867971	25.8320647238939	16.0500059952755	27.5636456993785
YBL061C	82.5390513004466	67.0058133208558	50.0257652923081	55.2053615640436	57.7040861916177	69.0650662997585	52.2216010328845	50.3911187609553	84.0365305492117	63.7574739508284	102.828150647073	61.2795478371482	53.353754816531	51.3293770435647	38.3381761740266	51.2505644703331	50.8838652813471	57.4086352375124	62.2653430635442	61.9629110609484	100.66664824583	60.0358846242113	46.7905130110888	55.6263903819616	55.5956497539806	38.5320832369482	22.5836547100271	53.5287680524656	36.5158328533844	50.9946758741084	72.4979200867002	70.0740916605843	51.1629004967014	48.3395257201785	57.7305534094313	57.0369223727206	59.3586134807989	60.5290036765167	70.8657111258532	56.6315846718487	86.8457128903491	84.7575897404625	49.1930108262056	64.1926412092802	56.3538853417827	32.1125786808557	40.9007691461654	42.3136521693626	30.4650820887868
YBL062W	1.35309920164667	1.69634970432546	0.980897358672707	2.76026807820218	2.11112510457138	4.50424345433208	2.94206203002166	2.96418345652679	1.95433791974911	2.55029895803314	1.58197154841651	0	4.30272216262347	0.658068936455958	0	0	4.04758019283443	1.9571125649152	2.25055456856184	3.87268194130927	2.0972218384548	0	1.73298196337366	1.76591715498291	2.87563705624038	2.65738505082402	3.34572662370772	3.38789671218137	6.08597214223073	3.23775719835609	1.68599814155117	2.18981536439326	3.41086003311343	2.7233535617002	2.1785114494125	1.87006302861379	2.01215638917962	0.976274252847044	0	4.996904529869	0	1.81623406586705	0	0.944009429548238	2.34807855590761	3.32199089801956	0.717557353441498	2.9181829082319	2.90143638940826
YBL063W	4.05929760494	2.54452455648819	5.88538415203624	8.28080423460654	8.44450041828552	9.75919415105283	7.35515507505416	8.299713678275	4.88584479937278	12.1139200506574	1.58197154841651	0	7.74489989272224	9.21296511038341	10.2235136464071	3.10609481638382	8.67338612750235	13.0474170994346	8.25203341806007	7.19212360528865	4.1944436769096	2.14413873657898	7.79841883518147	7.06366861993164	9.58545685413459	7.97215515247205	8.36431655926929	12.8740075062892	7.10030083260252	21.0454217893146	1.68599814155117	3.64969227398876	6.82172006622685	8.17006068510059	10.8925572470625	5.61018908584137	4.02431277835925	4.88137126423522	11.5362785553714	14.990713589607	3.90317810743142	1.81623406586705	8.35353014029906	3.77603771819295	7.63125530669973	16.6099544900978	17.9389338360375	18.9681889035074	8.70430916822479
YBL064C	200.258681843706	283.290400622352	615.022643887787	745.272381114588	579.151987020748	532.251434853574	633.278851962163	580.387120787944	574.575348406238	660.527430130582	272.09910632764	295.89267384223	575.70422535902	619.900938141512	536.734466436373	587.051920296543	573.021710156989	512.11112115281	579.14270897658	535.536588455339	246.423566018439	300.179423121057	597.012286382226	618.071004244018	661.396522935286	604.555099062464	343.773410585968	559.680536852362	259.668144735178	391.768621001087	296.735672913005	327.742366204191	723.955042028325	693.774319843125	568.591488296663	629.27620912854	579.501040083731	695.107268027095	610.598743537874	622.947431390335	303.472097852793	193.126222337197	562.471029446803	591.893912326745	581.149442587134	409.712210755746	435.557313538989	245.12736429148	297.397229914347
YBL065W	10.8247936131733	12.722622782441	19.6179471734541	33.1232169384262	17.5927092047615	15.0141448477736	6.61963956754874	8.89255036958036	10.7488585586201	10.8387705716408	7.90985774208256	19.2592864631037	24.0952441106914	20.4001370301347	8.94557444060621	4.65914222457573	9.25161186933584	12.3950462444629	12.7531425551838	13.2777666559175	14.6805528691836	9.64862431460539	18.1963106154234	14.1273372398633	10.544002539548	17.2730028303561	10.0371798711232	10.1636901365441	13.1862729748332	7.2849536963012	10.115988849307	13.1388921863596	38.372175372526	20.4251517127515	11.9818129717688	14.9605042289103	9.0547037513083	2.92882275854113	11.5362785553714	11.6594439030277	6.83056168800498	6.6595249081792	20.4197403429533	17.9361791614165	9.97933386260734	8.85864239471882	5.74045882753199	5.83636581646381	4.3521545841124
YBL066C	21.6495872263466	25.4452455648819	49.0448679336354	38.6437530948305	28.1483347276184	36.0339476346566	31.6271668227329	33.7916914044053	33.2237446357349	31.8787369754142	18.9836585809981	17.5084422391852	51.6326659514816	36.8518604415336	31.9484801450222	29.5079007556463	47.9927365721797	31.3138010386431	33.0081336722403	33.7476569171237	26.215272980685	18.2251792609213	27.7277114139786	30.0205916347095	30.6734619332307	38.5320832369482	18.4014964303924	41.3323398886127	23.3295598785511	37.234207781095	25.2899721232675	22.6280920987303	46.0466104470312	42.2119802063531	30.499160291775	25.2458508862862	31.1884240322842	31.2407760911054	32.9607958724899	43.3065059255313	21.4674795908728	24.2164542115607	38.9831406547289	33.9843394637366	39.3303158114525	34.3272392795354	31.5725235514259	20.4272803576233	17.4086183364496
YBL067C	50.0646704609266	63.6131139122049	29.4269207601812	35.8834850166283	26.7409179912375	31.5297041803245	15.4458256576137	24.899141034825	21.4977171172402	21.6775411432817	50.6230895493284	36.7677287022889	56.7959325466298	32.9034468227979	35.7822977624248	15.5304740819191	27.176609866174	29.3566884737279	30.0073942474912	20.4698902612062	46.1388804460056	54.6755377827639	42.4580581026547	36.2013016771496	28.7563705624038	17.2730028303561	15.8922014626117	21.0049596155245	31.4441894015254	11.3321501942463	38.7779572556768	67.884276296191	30.6977402980208	27.914374007427	27.2313931176563	26.1808824005931	17.1033293080268	17.5729365512468	20.6004974203062	13.3250787463173	37.0801920205985	50.2491424889885	27.8451004676635	21.7122168796095	18.7846284472609	11.0733029933985	20.8091632498034	11.6727316329276	8.70430916822479
YBL068W	43.2991744526933	40.7123929038111	20.5988445321268	20.7020105865163	24.6297928866661	28.5268752107698	38.982321897787	37.3487115522375	34.2009135956094	46.5429559841047	37.9673171619963	49.0236382697185	16.3503442179692	21.0582059665906	20.4470272928142	20.1896163064948	37.0064474773434	32.6185427485866	37.509242809364	35.4073777491133	41.944436769096	47.1710522047374	10.397891780242	15.8932543948462	30.6734619332307	29.2312355590642	15.8922014626117	29.813491067196	29.4155320207819	17.8076645909585	40.463955397228	37.9567996494832	10.2325800993403	19.0634749319014	32.6776717411875	25.2458508862862	29.1762676431045	35.1458731024936	40.3769749438001	48.3034104554003	39.0317810743142	32.0868018303179	16.7070602805981	24.5442451682542	30.5250212267989	23.2539362861369	25.1145073704524	16.0500059952755	18.8593365311537
YBL069W	8.11859520987999	8.48174852162732	7.84717886938166	8.28080423460654	14.0741673638092	20.2690955444943	16.9168566726246	24.3063043435196	16.6118723178674	12.7514947901657	9.49182929049907	7.00337689567408	11.187077622821	12.5033097926632	12.7793920580089	13.9774266737272	17.9249979968382	21.5282382140672	21.7553608294311	17.7036888745567	12.5833310307288	2.14413873657898	22.5287655238576	9.712544352406	18.2123680228557	26.5738505082402	10.0371798711232	12.8740075062892	22.3152311881793	7.2849536963012	3.37199628310233	2.91975381919101	8.52715008278356	9.53173746595069	17.4280915953	15.8955357432172	25.1519548647453	10.7390167813175	14.0083382458082	18.3219832761863	6.83056168800498	15.1352838822254	11.1380401870654	9.44009429548238	18.7846284472609	3.32199089801956	12.916032361947	8.75454872469571	14.5071819470413
YBL071W-A	56.8301664691599	37.3196934951602	9.80897358672707	24.8424127038196	21.1112510457138	13.5127303629962	16.9168566726246	19.5636108130768	15.6347033579929	14.6642190086905	39.5492887104128	52.5253267175556	13.7687109203951	17.7678612843109	16.6132096754115	17.083521490111	23.1290296733396	13.6997879544064	15.7538819799329	14.3842472105773	57.673600557507	69.6845089388167	19.0628015971103	16.7762129723376	17.2538223374423	26.5738505082402	15.0557698066847	18.2946422457794	29.4155320207819	19.4265431901365	57.3239368127397	37.2268611946854	21.3178752069589	27.233535617002	18.5173473200063	23.3757878576724	27.1641112539249	23.4305820683291	21.4245173171184	19.987618119476	40.9833701280299	58.1194901077457	19.4915703273645	15.1041508727718	24.6548248370299	21.0392756874572	25.8320647238939	26.2636461740871	21.760772920562
YBL072C	139.369217769607	72.9430372859949	64.7392256723987	44.1642892512349	108.371088701331	75.0707242388679	114.004903663339	103.153584287132	101.625571826954	119.864051027557	66.4428050334935	73.5354574045778	52.4932103840063	59.8842732174922	74.1204739364514	125.796840063545	106.393536497362	103.726965940505	90.0221827424735	124.479062399227	82.8402626189646	83.62141072658	43.3245490843415	44.1479288745727	51.7614670123268	63.7772412197764	76.9517123452775	73.1785689831175	132.877058438704	87.4194443556144	64.0679293789443	89.0524914853259	43.4884654221962	75.5730613371805	67.5338549317875	70.1273635730171	74.449786399646	136.678395398586	96.4103279270328	126.588248090015	45.8623427623192	128.347207321272	40.8394806859065	83.0728298002449	56.9409049807596	60.9031664636919	105.4809309559	68.5772983434497	113.156019186922
YBL073W	8.11859520987999	3.39269940865093	5.88538415203624	4.14040211730327	6.33337531371414	2.25212172716604	2.20654652251625	2.96418345652679	2.93150687962367	3.8254484370497	6.32788619366604	3.50168844783704	2.58163329757408	2.63227574582383	2.55587841160177	0	2.89112870916745	2.60948341988693	1.50036971237456	4.42592221863917	5.243054596137	7.50448557802641	4.33245490843415	3.53183430996582	3.83418274165383	3.98607757623602	3.34572662370772	4.74305539705392	4.05731476148715	4.85663579753413	6.74399256620467	5.10956918358427	5.9690050579485	1.3616767808501	5.44627862353125	4.67515757153447	3.01823458376943	1.95254850569409	1.64803979362449	0	4.87897263428927	7.87034761875723	3.71268006235514	5.66405657728943	2.34807855590761	6.64398179603912	5.02290147409049	2.9181829082319	2.90143638940826
YBL074C	6.76549600823333	3.39269940865093	4.90448679336354	1.38013403910109	4.92595857733322	3.00282896955472	3.67757753752708	2.96418345652679	4.88584479937278	3.8254484370497	9.49182929049907	5.25253267175556	4.30272216262347	5.92262042810362	2.55587841160177	6.21218963276765	4.04758019283443	1.9571125649152	2.25055456856184	3.87268194130927	9.4374982730466	7.50448557802641	0	0.882958577491455	3.83418274165383	5.31477010164803	0.836431655926929	2.71031736974509	3.04298607111536	2.42831789876707	8.42999070775583	7.29938454797753	2.55814502483507	2.7233535617002	3.26776717411875	5.61018908584137	1.00607819458981	2.92882275854113	2.47205969043674	1.66563484328967	11.7095343222943	9.08117032933527	0.928170015588784	3.77603771819295	2.34807855590761	1.10733029933985	2.87022941376599	5.83636581646381	4.3521545841124
YBL075C	243.5578562964	265.478728726935	941.661464325799	959.193157175257	332.150349785897	324.305528711909	320.684761272361	260.255307483052	477.835621378657	384.457567923495	466.681606782871	351.919689007622	816.656666465934	948.935406369491	350.155342389443	341.670429802221	302.412062978915	280.519467637845	440.358510581933	435.400098258628	289.416613706763	285.170451965004	554.554228279571	912.096210548673	341.242264007191	374.691292166186	1027.13807347827	271.709316316946	1260.81056213213	623.268260683547	293.363676629903	148.177506323944	1036.0487350582	738.028815220753	504.325400538994	320.715809407265	244.477001285324	357.316376542018	319.719719963152	486.365374240583	287.859385423067	193.126222337197	712.834571972186	749.543487061301	232.459777034853	414.141531953105	336.534398764063	1035.95493242233	750.021306662036
YBL076C	52.7708688642199	61.9167642078794	27.4651260428358	30.362948860224	39.4076686186658	25.5240462412151	33.8337133452491	26.6776511087411	35.178082555484	29.9660127568894	45.8771749040788	59.5287036132296	24.0952441106914	30.2711710769741	34.5043585566239	31.0609481638382	27.176609866174	35.2280261684735	30.0073942474912	33.7476569171237	42.9930476883234	39.666566626711	34.6596392674732	27.3717159022351	23.9636421353365	31.8886206098882	65.2416691623005	18.2946422457794	79.1176378489995	38.853086380273	64.0679293789443	54.7453841098315	24.7287352400723	28.5952123978521	15.2495801458875	38.3362920865827	30.1823458376943	30.2645018382584	39.5529550469878	34.978331709083	62.4508497189027	56.3032560418786	22.2760803741308	25.4882545978024	26.4158837539606	32.1125786808557	39.4656544392824	43.7727436234786	58.0287277881653
YBL078C	412.695256502233	454.621720759224	686.628151070895	749.412783231892	603.078071539224	772.477752417951	603.858231661946	815.743287236171	740.694071584913	885.591313177007	488.829208460702	413.19923684477	847.636266036823	708.082175626611	727.147408100705	625.87810550134	748.224109932536	897.662296441103	802.697796120389	862.501592357308	418.395756771733	370.936001428163	838.763270272851	854.703903011728	926.913677794815	855.677986365333	1713.84846299428	899.147787412935	3362.49960858248	1461.03793575818	433.30152237865	418.98467305391	798.99396275682	759.815643714355	764.657518743788	886.409875562936	880.318420266085	766.37528848493	847.916473819801	962.736939421427	516.195304707805	368.695515371012	799.154383421943	746.711458772656	1054.28727160252	1113.97428113589	896.946691801873	2991.1374809377	1862.72216200011
YBL079W	37.8867776461066	44.9532671646248	37.2740996295629	48.3046913685381	55.5929610870463	52.5495069672075	46.3374769728412	54.5409756000928	42.9954342344804	62.4823244718118	60.1149188398274	26.2626633587778	50.7721215189569	57.9100664081243	38.3381761740266	38.8261852047978	49.1491880558467	50.2325558328234	54.0133096454841	55.3240277329896	41.944436769096	35.3782891535531	63.2538416631386	70.6366861993164	46.010192899846	55.8050860673044	112.081841894209	60.3045614768283	232.28127009514	106.036548246162	37.0919591141257	37.9567996494832	68.2172006622685	59.2329399669793	59.9090648588438	48.6216387439585	56.3403788970294	43.932341378117	51.9132534991715	54.965949828559	37.0801920205985	40.5625608043642	59.4028809976822	48.1444809069601	62.2240817315517	86.3717633485085	45.2061132668144	210.109169392697	126.212482939259
YBL080C	8.11859520987999	6.78539881730185	12.7516656627452	12.4212063519098	9.85191715466644	12.7620231206075	11.7682481200867	12.4495705174125	7.81735167899644	10.8387705716408	11.0738008389156	8.75422111959259	12.0476220553457	21.0582059665906	15.3352704696106	24.8487585310706	10.9862890948363	12.3950462444629	12.0029576989965	7.74536388261854	5.243054596137	5.36034684144744	16.4633286520498	12.3614200848804	13.4196395957884	6.64346262706004	15.0557698066847	16.2619042184706	10.1432869037179	15.3793466921914	5.0579944246535	2.18981536439326	11.0852951076186	13.616767808501	16.3388358705938	14.0254727146034	11.0668601404879	11.7152910341645	9.06421886493471	21.6532529627657	5.85476716114713	6.6595249081792	15.7788902650093	14.1601414432236	14.0884713354457	9.96597269405867	12.916032361947	21.8863718117393	5.80287277881653
YBL081W	24.35578562964	15.2671473389292	0.980897358672707	1.38013403910109	4.92595857733322	6.75636518149811	8.09067058255958	7.70687698696964	8.794520638871	7.01332213459113	28.4754878714972	19.2592864631037	1.72108886504939	5.26455149164766	1.27793920580089	3.10609481638382	8.09516038566886	7.17607940468905	8.25203341806007	2.76620138664948	19.9236074653206	20.3693179975003	5.19894589012098	4.41479288745727	12.461093910375	6.64346262706004	5.8550215914885	5.42063473949019	4.05731476148715	4.85663579753413	10.115988849307	13.1388921863596	0.852715008278356	4.0850303425503	6.5355343482375	6.54522060014826	8.04862555671849	8.7864682756234	3.29607958724899	8.32817421644833	15.6127124297257	32.692213185607	4.64085007794392	5.66405657728943	14.0884713354457	2.21466059867971	10.7633603016225	4.37727436234786	2.90143638940826
YBL083C	20.2964880247	12.722622782441	26.4842286841631	24.8424127038196	29.5557514639993	35.2832403922679	36.0402598677654	25.4919777261304	24.4292239968639	29.3284380173811	12.6557723873321	22.7609749109407	28.3979662733149	32.2453778863419	31.9484801450222	41.9322800211816	27.176609866174	25.4424633438976	18.754621404682	30.4282152531443	22.0208293037754	11.7927630511844	33.7931482857864	33.5524259446753	23.005096449923	30.5599280844762	21.7472230541002	27.1031736974509	11.1576155940897	16.9982252913695	23.6039739817163	21.1682151891348	34.9613153394126	32.6802427404024	22.8743702188313	23.3757878576724	25.1519548647453	24.4068563211761	28.8406963884286	19.987618119476	14.6369179028678	22.4002201456937	34.342290576785	33.9843394637366	19.9586677252147	25.4685968848166	24.3969500170109	10.2136401788117	13.0564637523372
YBL084C	16.23719041976	16.1153221910919	26.4842286841631	24.8424127038196	18.296417572952	32.2804114227132	28.6851047927112	40.3128950087643	26.383561916613	29.3284380173811	14.2377439357486	22.7609749109407	25.8163329757408	25.0066195853264	21.7249664986151	26.4018059392625	24.8637068988401	22.8329799240106	28.5070245351166	27.1087735891649	15.729163788411	15.0089711560528	36.3926212308468	27.3717159022351	23.005096449923	38.5320832369482	368.029928607849	31.1686497520686	402.6884900776	259.830015168076	13.4879851324093	15.3287075507528	25.5814502483507	30.6377275691272	20.6958587694188	28.9859769435137	29.1762676431045	25.3831305740231	21.4245173171184	36.6439665523727	14.6369179028678	15.7406952375145	30.6296105144299	28.3202828864471	27.5899230319144	145.060269213521	55.9694735684369	650.754788535715	384.440321596595
YBL085W	18.9433888230533	16.9634970432546	23.541536608145	34.5033509775272	31.6668765685707	37.535362119434	31.6271668227329	46.2412619218178	50.8127859134769	53.5562781186959	17.4016870325816	21.0101306870222	31.8401440034137	29.6131021405181	42.1719937914293	51.2505644703331	39.8975761865108	50.2325558328234	58.5144187826078	44.2592221863917	27.2638838999124	21.4413873657898	51.122967919523	38.850177409624	78.6007462039036	59.7911636435404	55.2044892911773	72.5009896406813	72.017337016397	65.5645832667108	25.2899721232675	25.5478459179214	41.7830354056395	35.4035963021026	31.5884160164813	35.531197543662	34.2066586160536	42.9560671252699	51.0892336023593	49.96904529869	30.2496303325935	37.5355040279191	50.1211808417944	36.8163677523813	60.463022814621	60.9031664636919	64.5801618097348	94.8409445175369	63.8316005669818
YBL086C	21.6495872263466	23.7488958605565	50.0257652923081	41.4040211730327	44.333627195999	41.2888983313774	48.5440234953574	26.0848144174357	42.0182652746059	35.7041854124639	22.1476016778312	21.0101306870222	42.16667719371	41.4583429967253	43.4499329972302	37.2731377966059	37.0064474773434	35.2280261684735	46.5114610836113	41.4930207997422	19.9236074653206	18.2251792609213	22.5287655238576	26.4887573247436	20.1294593936826	14.6156177795321	28.4386763015156	16.2619042184706	17.2435877363204	16.1887859917804	21.9179758401652	42.3364303782697	49.4574704801447	42.8928185967781	40.3024618141313	52.3617648011861	44.2674405619517	41.0035186195758	32.1367759756776	29.981427179214	31.2254248594513	22.4002201456937	21.347910358542	18.8801885909648	18.7846284472609	17.7172847894376	17.221376482596	21.8863718117393	18.8593365311537
YBL087C	46.0053728559866	27.9897701213701	15.6943577387633	19.3218765474153	25.3335012548566	23.2719245140491	30.156135807722	30.2346712565732	38.1095894351076	31.2411622359059	37.9673171619963	40.2694171501259	16.3503442179692	19.0839991572228	21.7249664986151	23.2957111228787	28.333061349841	23.4853507789824	27.7568396789293	27.6620138664948	44.0416586075508	25.7296648389477	14.7303466886761	10.5955029298975	25.8807335061634	18.6016953557681	18.4014964303924	19.6498009306519	37.5301615437562	9.71327159506826	52.2659423880862	27.7376612823146	17.0543001655671	14.297606198926	15.2495801458875	25.2458508862862	19.1154856972064	28.3119533325643	40.3769749438001	33.3126968657933	30.2496303325935	50.8545538442775	16.7070602805981	28.3202828864471	16.4365498913533	26.5759271841565	29.4198514911014	24.8045547199712	27.5636456993785
YBL088C	6.76549600823333	12.722622782441	26.4842286841631	20.7020105865163	23.9260845184756	24.7733389988264	25.7430427626896	25.4919777261304	18.5662102376165	17.2145179667237	9.49182929049907	12.2559095674296	31.8401440034137	21.0582059665906	24.2808449102169	21.7426637146868	20.8161267060056	19.571125649152	19.5048062608693	19.9166499838763	5.243054596137	3.21620810486846	25.1282384689181	31.7865087896924	21.0880050790961	13.2869252541201	30.9479712692964	11.5188488214167	25.3582172592947	29.9492540847938	11.8019869908582	5.10956918358427	23.876020231794	22.4676668840266	28.3206488423625	20.5706933147517	25.1519548647453	12.6915652870116	20.6004974203062	19.987618119476	6.83056168800498	7.87034761875723	26.9169304520747	24.5442451682542	20.5456873641916	17.7172847894376	20.091605896362	29.181829082319	37.7186730623074
YBL089W	9.47169441152666	6.78539881730185	9.80897358672707	12.4212063519098	6.33337531371414	9.00848690866415	4.41309304503249	4.1498568391375	5.86301375924733	11.4763453111491	11.0738008389156	10.5050653435111	11.187077622821	5.26455149164766	7.66763523480532	9.31828444915147	8.09516038566886	3.26185427485866	9.00221827424735	7.74536388261854	12.5833310307288	9.64862431460539	13.8638557069893	8.82958577491455	7.66836548330767	3.98607757623602	20.0743597422463	8.80853145167156	8.11462952297431	6.47551439671217	8.42999070775583	10.9490768219663	8.52715008278356	12.2550910276509	13.071068696475	4.67515757153447	11.0668601404879	6.83391976992931	9.06421886493471	13.3250787463173	7.80635621486284	9.68658168462428	4.64085007794392	13.2161320136753	6.45721602874593	11.0733029933985	6.45801618097348	10.2136401788117	13.0564637523372
YBL090W	21.6495872263466	12.722622782441	11.7707683040725	11.0410723128087	11.9630422592378	8.25777966627547	8.09067058255958	13.0424072087179	11.7260275184947	9.56362109262426	9.49182929049907	12.2559095674296	13.7687109203951	8.55489617392745	7.66763523480532	15.5304740819191	9.82983761116933	4.56659598480212	5.25129399331096	11.0648055465979	18.8749965460932	12.8648324194739	15.5968376703629	11.4784615073889	9.58545685413459	13.2869252541201	8.36431655926929	10.8412694789804	10.1432869037179	9.71327159506826	23.6039739817163	17.5185229151461	8.52715008278356	8.17006068510059	8.71404579765001	14.9605042289103	12.0729383350777	14.6441137927057	7.41617907131022	9.993809059738	18.5400960102992	23.0056315009827	9.28170015588784	17.9361791614165	14.6754909744226	9.96597269405867	12.1984750085055	8.75454872469571	11.6057455576331
YBL091C	78.4797536955066	63.6131139122049	75.5290966177984	77.287506189661	75.2967953963792	70.5664807845359	75.0225817655524	66.9905461175053	79.150685749839	70.1332213459113	58.5329472914109	57.7778593893111	62.8197435743026	69.0972383278756	80.5101699654559	83.8645600423632	75.1693464383537	68.4989397720319	80.2697796120389	73.0277166075463	51.3819350421426	73.9727864119746	60.6543687180781	70.6366861993164	74.7665634622498	62.4485486943644	44.3308777641272	57.5942441070833	35.5015041630126	42.0908435786291	69.1259238035978	68.6142147509888	67.3644856539902	76.2538997276055	66.4445992070813	64.5171744871757	82.4984119563645	71.2680204578342	79.1059100939757	74.953567948035	77.0877676217705	69.016894502948	73.325431231514	74.5767449343108	73.9644745110897	53.1518543683129	52.3816868012294	29.181829082319	39.1693912570116
YBL091C-A	20.2964880247	28.8379449735329	19.6179471734541	20.7020105865163	23.9260845184756	27.7761679683811	28.6851047927112	29.6418345652678	24.4292239968639	24.2278401013148	11.0738008389156	21.0101306870222	23.2346996781667	19.0839991572228	30.6705409392213	31.0609481638382	31.802415800842	35.8803970234453	24.7561002541802	35.4073777491133	19.9236074653206	18.2251792609213	34.6596392674732	18.5421301273205	24.9221878207499	37.2033907115362	24.2565180218809	23.0376976428333	16.2292590459486	10.5227108946573	30.347966547921	25.5478459179214	16.2015851572888	24.5101820553018	22.8743702188313	24.3108193719793	19.1154856972064	36.1221473553406	38.7289351501756	24.984522649345	21.4674795908728	20.5839860798266	24.1324204053084	17.9361791614165	40.5043550894063	19.9319453881173	26.5496220773354	27.7227376282031	21.760772920562
YBL092W	139.369217769607	78.0320863989713	40.216791705581	27.6026807820218	51.3707108779036	47.2945562704868	77.9646437955741	66.9905461175053	71.3333340708425	68.8580718668947	75.9346343239925	82.2896785241704	31.8401440034137	40.1422051238134	49.8396290262346	77.6523704095956	60.7137028925165	63.279972932258	81.7701493244135	77.4536388261854	100.66664824583	92.1979656728959	34.6596392674732	18.5421301273205	26.8392791915768	53.1477010164803	31.7844029252233	46.7529746281029	111.576155940897	49.3757972749303	96.1018940684165	108.030891310067	31.5504553062992	38.1269498638028	40.3024618141313	51.4267332868792	45.2735187565415	114.224087583104	80.7539498876001	93.2755512242213	80.9909457292019	135.006732229451	17.6352302961869	37.7603771819295	35.8081979775911	50.9371937696332	83.2366529992138	39.3954692611307	65.2823187616859
YBL093C	75.7735552922133	37.3196934951602	28.4460234015085	17.9417425083142	28.1483347276184	24.0226317564377	37.5112908827762	37.3487115522375	31.2694067159858	34.4290359334473	37.9673171619963	42.0202613740445	29.2585107058396	32.2453778863419	29.3926017334204	18.6365688983029	17.9249979968382	27.3995759088127	31.5077639598657	34.8541374717835	54.5277677998248	48.2431215730269	38.1256031942205	25.6057987472522	32.5905533040576	30.5599280844762	32.6208345811502	31.1686497520686	16.2292590459486	35.615329181917	47.2079479634327	36.4969227398876	28.1395952731858	36.0844346925276	23.9636259435375	32.7261030007413	22.1337202809759	23.4305820683291	21.4245173171184	29.981427179214	48.7897263428927	75.6764194111272	34.342290576785	26.4322640273507	36.395217616568	31.0052483815159	35.8778676720749	30.640920536435	26.1129275046744
YBL095W	47.3584720576333	43.2569174602993	59.8347388790351	77.287506189661	54.8892527188559	62.3087011182604	61.7833026304549	56.9123223653143	73.2876719905916	63.7574739508284	34.8033740651632	52.5253267175556	67.9830101694508	70.4133762007875	77.9542915538541	63.6749437358684	63.0266058598504	56.103893527569	64.515897632106	66.9420735569174	65.0138769920988	38.5944972584216	51.9894589012098	90.9447334816198	57.5127411248075	55.8050860673044	183.178532647997	71.823410298245	132.877058438704	137.604680930134	47.2079479634327	45.9861226522584	66.5117706457118	51.7437176723038	52.2842747859	61.7120799442551	66.4011608429276	75.1731174692224	68.3936514354164	74.953567948035	39.0317810743142	46.6166743572544	73.325431231514	59.472594061539	49.8966693130367	126.235654124743	69.6030632838253	246.586455745596	166.832592390975
YBL098W	41.9460752510466	39.8642180516484	51.9875600096535	59.3457636813469	45.7410439323799	39.0367766042113	41.1888684203033	37.3487115522375	34.2009135956094	49.0932549421379	44.2952033556623	50.7744824936371	56.7959325466298	53.3035838529326	38.3381761740266	40.3792326129897	40.4758019283443	30.6614301836714	37.509242809364	37.6203388584329	53.4791568805974	56.8196765193428	76.251206388441	49.4456803395215	72.8494720914229	39.8607757623602	46.0037410759811	52.8511887100293	29.4155320207819	42.0908435786291	26.9759702648187	42.3364303782697	46.8993254553096	63.3179703095296	28.3206488423625	38.3362920865827	35.2127368106434	56.6239066651286	35.4328555629266	36.6439665523727	34.1528084400249	57.5140787524567	57.5465409665046	49.0884903365084	49.3096496740598	38.7565604768948	45.9236706202559	33.5591034446669	42.0708276464198
YBL099W	627.838029564053	511.449435854127	276.613055145703	298.108952445835	313.853932212945	365.594427043287	233.893931386722	336.138403970137	317.57991195923	314.961921317092	681.829737367516	413.19923684477	298.608918086069	300.737503960373	352.711220801045	307.503386821999	300.677385753415	350.975519974792	270.816733083608	298.749749758144	619.729053263394	693.628881283298	361.326739363408	320.513963629398	488.858299560864	486.301464300795	293.587511230352	557.647798825053	204.894395455101	321.347401936842	574.925366268948	470.810303344551	266.899797591126	285.271285588096	373.614713574244	306.690336692661	329.993647825458	232.353272177596	303.239322026907	276.495383986085	591.33148327586	664.136256752052	329.500355534018	348.3394795033	664.506231321854	456.220083328019	549.648932736188	213.027352300929	314.805848250797
YBL101C	86.5983489053866	111.959080485481	62.7774309550532	69.0067019550545	66.1485866099032	58.555164906317	64.7253646604766	82.4043000914446	80.1278547097135	103.287107800342	115.483923034405	82.2896785241704	71.4251878995496	76.9940655653471	80.5101699654559	45.0383748375654	72.8564434710197	97.2032573907881	113.277913284279	105.66889297001	123.736088468833	122.215907985002	70.1857695166332	77.700354819248	77.6422005184902	75.7354739484845	202.416460734317	107.735115447368	143.020345342422	169.172813614106	97.7878922099677	74.4537223893708	78.4497807616088	61.2754551382544	70.8016221059063	66.3872375157895	75.4558645942359	74.1968432163753	75.8098305067267	78.2848376346143	106.361603427506	118.660625636647	74.2536012471028	74.5767449343108	72.7904352331359	138.416287417482	96.1526853611608	271.391010465567	191.494801700945
YBL102W	108.247936131733	100.932807407365	118.688580399398	144.914074105614	116.111880751426	114.107500843079	129.450729320953	120.938685026293	117.260275184947	131.340396338707	77.516605872409	91.043899643763	117.894587255883	121.084684307896	127.793920580089	88.523702266939	122.005631526866	116.77438303994	119.279392133777	138.863309609804	94.374982730466	106.134867460659	125.64119234459	136.858579511175	164.869857891115	155.457025473205	155.576288002409	119.93154361122	137.948701890563	135.176363031367	87.6719033606607	95.6219375785056	135.581686316259	130.040132571184	140.513988487106	117.813970802669	150.911729188472	142.536040915668	140.907402354894	146.575866209491	91.7246855246383	83.5467670298844	135.512822275963	121.777216411723	168.474636386371	147.2749298122	132.748110386677	145.909145411595	123.311046549851
YBL103C	14.8840912181133	25.4452455648819	23.541536608145	17.9417425083142	19.7038343093329	21.7705100292717	26.478558270195	20.7492841956875	15.6347033579929	19.7648169247568	28.4754878714972	29.7643518066148	24.9557885432161	29.6131021405181	23.002905704416	26.4018059392625	20.2379009641722	22.8329799240106	24.0059153979929	17.7036888745567	12.5833310307288	26.8017342072372	19.0628015971103	26.4887573247436	36.4247360457114	21.2590804065921	27.6022446455887	30.4910704096323	60.8597214223073	49.3757972749303	35.4059609725745	20.4382767343371	18.7597301821238	17.7017981510513	19.6066030447125	18.7006302861379	17.1033293080268	24.4068563211761	26.3686366979919	21.6532529627657	18.5400960102992	19.3731633692486	18.5634003117757	22.6562263091577	27.5899230319144	37.649230177555	33.7251956117504	53.9863838022902	42.0708276464198
YBL104C	21.6495872263466	22.052546156231	30.4078181188539	41.4040211730327	21.1112510457138	25.5240462412151	19.8589187026462	23.1206309609089	21.4977171172402	28.6908632778728	9.49182929049907	35.0168844783704	29.2585107058396	28.2969642676062	17.8911488812124	24.8487585310706	15.6120950295042	20.8758673590954	20.2549911170565	20.4698902612062	38.7986040114138	20.3693179975003	25.9947294506049	22.9569230147778	21.0880050790961	15.9443103049441	6.69145324741543	27.7807530398872	26.3725459496665	26.7114968864377	23.6039739817163	20.4382767343371	23.0233052235156	22.4676668840266	21.785114494125	26.1808824005931	21.127642086386	27.3356790797172	19.7764775234939	14.990713589607	25.3706576983042	31.4813904750289	25.988760436486	22.6562263091577	30.5250212267989	21.0392756874572	27.9847367842184	17.5090974493914	24.6622093099702
YBL105C	32.47438083952	30.5342946778583	17.6561524561087	13.8013403910109	19.0001259411424	14.2634376053849	20.5944342101516	24.3063043435196	20.5205481573657	28.0532885383645	37.9673171619963	22.7609749109407	10.3265331902963	23.0324127759585	23.002905704416	13.9774266737272	26.0201583825071	24.1377216339541	17.2542516923074	21.5763708158659	22.0208293037754	17.1531098926318	19.0628015971103	16.7762129723376	12.461093910375	25.2451579828282	27.6022446455887	20.3273802730882	25.3582172592947	17.8076645909585	35.4059609725745	34.3071073754944	17.9070151738455	12.9359294180759	19.6066030447125	26.1808824005931	12.0729383350777	28.3119533325643	32.9607958724899	18.3219832761863	31.2254248594513	30.2705677644509	17.6352302961869	18.8801885909648	26.4158837539606	19.9319453881173	12.916032361947	21.8863718117393	21.760772920562
YBL106C	18.9433888230533	17.8116718954174	32.3696128361993	51.0649594467403	41.5187937232371	41.2888983313774	26.478558270195	33.1988547131	30.2922377561112	35.0666106729556	11.0738008389156	21.0101306870222	26.6768774082655	37.5099293779896	30.6705409392213	38.8261852047978	29.489512833508	29.3566884737279	21.7553608294311	35.4073777491133	19.9236074653206	10.7206936828949	37.2591122125337	34.4353845221667	34.5076446748845	34.5460056607122	36.8029928607849	31.8462290945049	26.3725459496665	30.7586933843828	25.2899721232675	20.4382767343371	50.310185488423	32.6802427404024	49.0165076117813	35.531197543662	20.1215638917962	37.0984216081877	22.2485372139306	34.978331709083	20.4916850640149	15.1352838822254	42.6958207170841	30.2083017455436	35.8081979775911	27.6832574834963	25.8320647238939	45.2318350775945	36.2679548676033
YBL107C	33.8274800411666	29.6861198256956	26.4842286841631	30.362948860224	29.5557514639993	19.5183883021057	19.8589187026462	21.3421208869929	28.3378998363621	19.7648169247568	41.1312602588293	36.7677287022889	25.8163329757408	23.6904817124145	28.1146625276195	17.083521490111	15.0338692876707	20.8758673590954	14.2535122675583	22.1296110931958	49.2847132036878	46.098982836448	25.1282384689181	30.0205916347095	31.6320076186441	33.2173131353002	60.2230792267389	31.8462290945049	23.3295598785511	50.1852365745194	53.9519405296373	26.2777843727191	29.8450252897425	23.8293436648767	31.5884160164813	29.9210084578206	25.1519548647453	20.5017593097879	23.8965770075551	31.6470620225037	27.3222467520199	38.7463267384971	29.7014404988411	22.6562263091577	28.1769426708913	60.9031664636919	45.9236706202559	51.0682008940583	40.6201094517157
YBR001C	10.8247936131733	10.1780982259528	47.0830732162899	78.6676402287621	47.8521690369513	71.3171880269245	63.2543336454658	78.8472799436125	75.2420099103407	82.8847161360769	11.0738008389156	14.0067537913482	66.2619213044014	63.8326868362279	69.0087171132479	55.9097066949088	79.2169266311881	69.1513106270036	69.0170067692297	80.2198402128349	20.972218384548	18.2251792609213	64.1203326448254	64.4559761568762	92.020385799692	90.3510917280166	89.4981871841814	94.183528598642	43.6161336859869	108.464866144929	6.74399256620467	12.4089537315618	71.6280606953819	59.9137783574043	55.5520419600188	63.5821429728688	63.3829262591581	95.6748767790103	67.5696315386042	76.6192027913247	14.6369179028678	12.1082271057804	45.4803307638504	38.7043866114777	81.5957298177895	90.8010845458679	68.8855059303838	113.809133421044	89.9445280716562
YBR002C	13.5309920164667	13.5707976346037	7.84717886938166	8.28080423460654	11.2593338910474	17.2662665749396	9.56170159757041	12.4495705174125	9.77168959874555	10.2011958321325	6.32788619366604	12.2559095674296	10.3265331902963	11.1871719197513	12.7793920580089	12.4243792655353	9.82983761116933	12.3950462444629	15.0036971237456	8.29860415994844	14.6805528691836	12.8648324194739	11.2643827619288	12.3614200848804	7.66836548330767	7.97215515247205	6.69145324741543	9.48611079410783	8.11462952297431	8.90383229547924	10.115988849307	8.75926145757304	7.67443507450521	6.12754551382544	9.80330152235626	12.1554096859896	13.0790165296675	13.6678395398586	8.24019896812246	13.3250787463173	7.80635621486284	23.0056315009827	1.85634003117757	5.66405657728943	14.0884713354457	7.75131209537897	8.61068824129798	2.9181829082319	2.90143638940826
YBR003W	17.5902896214067	31.3824695300211	18.6370498147814	34.5033509775272	26.7409179912375	22.5212172716604	19.8589187026462	20.7492841956875	12.7031964783692	18.4896674457402	11.0738008389156	21.0101306870222	22.374155245642	17.7678612843109	28.1146625276195	20.1896163064948	20.2379009641722	20.8758673590954	17.2542516923074	18.8101694292165	20.972218384548	13.9369017877633	22.5287655238576	25.6057987472522	23.005096449923	27.9025430336522	16.7286331185386	16.2619042184706	9.1289582133461	11.3321501942463	3.37199628310233	22.6280920987303	14.4961551407321	14.9784445893511	25.0528816682438	20.5706933147517	15.0911729188472	18.5492108040938	21.4245173171184	9.993809059738	15.6127124297257	15.1352838822254	18.5634003117757	19.824198020513	25.2418444760068	19.9319453881173	18.656491189479	10.2136401788117	11.6057455576331
YBR004C	58.1832656708066	74.6393869903204	14.7134603800906	13.8013403910109	20.4075426775233	14.2634376053849	21.3299497176571	23.7134676522143	19.5433791974911	14.0266442691823	66.4428050334935	80.5388343002519	17.2108886504939	19.7420680936787	28.1146625276195	27.9548533474544	20.2379009641722	26.0948341988693	18.0044365484947	21.023130538536	57.673600557507	92.1979656728959	20.7957835604839	18.5421301273205	18.2123680228557	9.30084767788406	9.20074821519622	15.5843248760343	43.6161336859869	14.5699073926024	79.2419126529048	72.9938454797753	14.4961551407321	16.3401213702012	19.6066030447125	15.8955357432172	22.1337202809759	22.454307815482	17.3044178330572	11.6594439030277	82.9425347829176	59.3303128183237	14.8507202494205	25.4882545978024	21.1327070031685	7.75131209537897	12.1984750085055	20.4272803576233	20.3100547258578
YBR005W	148.840912181133	180.661243510662	39.2358943469083	34.5033509775272	42.9262104596181	24.0226317564377	38.2468063902816	37.9415482435428	34.2009135956094	32.5163117149225	194.582500455231	173.333578167933	35.2823217335124	41.4583429967253	28.1146625276195	66.7810385522522	35.2717702518429	36.532767878417	34.5085033846149	40.3865402450824	156.243026964883	202.621110606713	36.3926212308468	40.6160945646069	30.6734619332307	31.8886206098882	23.420086365954	36.5892844915588	106.504512489038	25.9020575868487	188.831791853731	191.243875157011	32.4031703145775	34.0419195212525	41.3917175388375	34.5961660293551	46.2795969511313	31.2407760911054	43.6730545310491	16.6563484328967	177.59460388813	144.087902558786	35.2704605923738	36.8163677523813	28.7639623098682	16.6099544900978	35.8778676720749	75.8727556140295	31.9158002834909
YBR006W	93.3638449136199	182.357593214987	76.5099939764712	73.1471040723578	63.3337531371414	47.2945562704868	50.0150545103683	50.9839554522607	60.5844755122224	54.1938528582042	148.705325551152	129.56247256997	86.914987684994	91.4715821673781	56.229325055239	62.1218963276765	60.7137028925165	48.2754432679082	55.5136793578587	52.5578263463401	120.590255711151	139.369017877633	46.7905130110888	45.9138460295556	23.9636421353365	26.5738505082402	51.0223310115427	31.1686497520686	105.490183798666	29.1398147852048	136.565849465645	166.425967693888	85.2715008278356	62.6371319191045	49.0165076117813	43.0114496581172	52.3160661186702	46.8611641366581	56.857372880045	44.972140768821	146.369179028678	84.7575897404625	45.4803307638504	45.3124526183154	26.4158837539606	23.2539362861369	24.3969500170109	52.5272923481743	30.4650820887868
YBR007C	14.8840912181133	19.5080215997428	17.6561524561087	16.5616084692131	12.6667506274283	9.75919415105283	13.2392791350975	16.0065906652446	14.6575343981183	21.0399664037734	15.8197154841651	8.75422111959259	10.3265331902963	7.89682723747149	12.7793920580089	12.4243792655353	18.5032237386717	20.2234965041237	10.5025879866219	13.2777666559175	10.486109192274	17.1531098926318	16.4633286520498	7.06366861993164	9.58545685413459	15.9443103049441	17.5650647744655	12.8740075062892	17.2435877363204	16.1887859917804	20.231977698614	16.0586460055506	5.9690050579485	8.85089907552564	6.5355343482375	8.41528362876205	27.1641112539249	12.6915652870116	18.1284377298694	13.3250787463173	14.6369179028678	22.4002201456937	15.7788902650093	15.1041508727718	17.0235695303302	8.85864239471882	15.0687044222715	14.5909145411595	17.4086183364496
YBR008C	16.23719041976	11.0262730781155	12.7516656627452	15.181474430112	17.5927092047615	18.0169738173283	24.2720117476787	20.1564475043821	12.7031964783692	11.4763453111491	11.0738008389156	1.75084422391852	15.4897997854445	13.8194476655751	15.3352704696106	18.6365688983029	15.0338692876707	15.0045296643498	17.2542516923074	9.95832499193813	9.4374982730466	4.28827747315795	17.3298196337366	9.712544352406	12.461093910375	26.5738505082402	9.20074821519622	15.5843248760343	13.1862729748332	16.9982252913695	6.74399256620467	8.02932300277528	22.1705902152373	14.9784445893511	23.9636259435375	14.0254727146034	21.127642086386	14.6441137927057	9.06421886493471	9.993809059738	8.78215074172069	7.87034761875723	12.994380218243	22.6562263091577	16.4365498913533	14.3952938914181	17.9389338360375	17.5090974493914	23.2114911152661
YBR009C	201.611781045353	178.116718954174	212.854726831977	142.153806027412	750.856828859221	987.930730983502	518.538432791318	516.953594818271	386.958908110324	299.022552829385	208.820244390979	266.128322035615	201.367397210778	157.93654474943	881.778052002612	798.266367810643	477.036237012629	391.422512983039	315.077639598657	281.046060883587	259.006897049168	253.008370916319	788.506793335015	500.637513437655	697.821258980998	1126.73126154938	333.736230714845	613.209304904828	260.68247342555	267.114968864377	180.401801145975	186.134305973427	176.51200671362	185.868880586038	876.850858388532	857.423898619422	809.892946644798	473.493012630816	349.384436248392	299.81427179214	222.481152123591	203.41821537711	1192.69847003159	474.836743062764	856.461653267301	360.989677584792	356.626004660425	249.504638653828	287.242202551418
YBR010W	228.673765078286	264.630553874772	203.04575324525	175.277022965838	522.151609197321	743.950877207181	386.881156947849	387.715196113703	268.721463965503	233.98992939954	230.967846068811	290.640141170474	186.738141857858	180.310888588932	653.026934164253	633.6433425423	350.983025292928	310.528526966544	243.059893404679	223.509072041278	298.854111979809	296.963215016188	689.726821422717	419.405324308441	487.89975387545	736.095659078253	344.609842241895	455.333318117176	273.868746400383	319.728523337664	286.619684063698	277.376612823146	180.775581755012	206.29403229879	587.108835616669	611.510610356709	540.263990494729	384.652055621735	249.678028734111	239.851417433712	333.721728185386	294.835330025752	882.689684824934	448.404479035413	601.108110312348	364.311668482812	333.664169350297	334.131942992553	330.763748392542
YBR011C	215.14277306182	228.159035231775	272.689465711013	276.026807820218	299.779764849136	362.591598073732	290.528625464639	266.183674396105	285.33333628337	228.251756743966	221.476016778312	234.613126005082	253.860607594785	256.646885217824	339.931828743036	347.882619434988	241.698360086399	234.853507789824	213.052499157187	211.89102621735	193.993020057069	212.269734921319	368.258667216903	326.694673671838	332.61535283847	328.187053776766	317.844029252233	243.928563277058	475.720155784369	262.258333066843	236.039739817163	219.711474894124	268.605227607682	315.228174766798	285.384999873038	300.145116092513	261.580330593351	290.929727348419	224.133411932931	228.191973530684	201.013672532718	240.34830804974	349.920095876972	342.67542292601	318.751663964458	297.87185052242	250.427516351083	294.736473731422	227.762756568549
YBR012C	23.0026864279933	25.4452455648819	15.6943577387633	9.66093827370763	19.0001259411424	15.7648520901623	19.1234031951408	13.6352439000232	19.5433791974911	17.2145179667237	14.2377439357486	17.5084422391852	18.0714330830186	15.793654474943	15.3352704696106	4.65914222457573	16.7685465131712	11.7426753894912	12.0029576989965	14.9374874879072	16.7777747076384	18.2251792609213	20.7957835604839	24.7228401697607	15.3367309666153	13.2869252541201	20.0743597422463	18.9722215882157	9.1289582133461	34.8058898823279	10.115988849307	22.6280920987303	18.7597301821238	26.5526972265769	15.2495801458875	14.9605042289103	26.1580330593351	12.6915652870116	14.0083382458082	13.3250787463173	17.5643014834414	13.3190498163584	22.2760803741308	17.9361791614165	10.5663535015842	17.7172847894376	18.656491189479	20.4272803576233	24.6622093099702
YBR014C	36.53367844446	31.3824695300211	43.1594837815991	33.1232169384262	41.5187937232371	31.5297041803245	35.30474436026	31.4203446391839	37.1324204752331	29.9660127568894	50.6230895493284	36.7677287022889	38.7244994636112	40.8002740602694	28.1146625276195	21.7426637146868	31.802415800842	30.0090593286997	29.2572093913039	29.3217346984845	31.458327576822	32.1620810486846	31.1936753407259	27.3717159022351	28.7563705624038	27.9025430336522	61.8959425385928	27.7807530398872	64.9170361837945	42.0908435786291	38.7779572556768	37.9567996494832	37.5194603642477	35.4035963021026	35.9454389153063	34.5961660293551	35.2127368106434	40.0272443667288	27.1926565948041	34.978331709083	26.3464522251621	26.6380996327168	21.347910358542	34.9283488932848	22.3067462811223	35.4345695788753	37.3129823789579	67.1182068893338	46.4229822305322
YBR015C	54.1239680658666	36.4715186429975	52.9684573683262	77.287506189661	80.9264623419029	73.5693097540906	62.5188181379603	56.3194856740089	63.5159823918461	49.0932549421379	34.8033740651632	54.2761709414741	61.9591991417779	71.0714451372434	98.4013188466683	69.887133368636	58.979025667016	54.7991518176255	51.7627550769223	57.5369888423092	39.8472149306412	34.3062197852636	83.1831342419357	61.8071004244018	55.5956497539806	65.1059337451884	54.3680576352504	39.9771812037401	85.2036099912302	38.043647080684	37.0919591141257	48.9058764714494	74.186205720217	57.8712631861292	93.6759923247376	81.3477417446998	76.4619427888257	53.6950839065874	60.153452467294	66.6253937315867	41.9591646548878	44.1950289360983	62.1873910444486	82.1288203706967	49.3096496740598	32.1125786808557	41.6183264996069	70.0363897975657	43.521545841124
YBR016W	345.0402964199	403.73122962946	219.721008342686	256.704931272803	168.89000836571	237.223488594823	152.251710053621	218.756739091677	164.164385258925	221.238434609375	390.746972458878	318.65364875317	277.095307272951	264.543712455295	238.974631484766	242.275395677938	226.086265056895	271.386275668241	179.29418062876	241.766001193165	340.798548748905	376.29634826961	240.018001927252	281.663786219774	250.180423892913	275.039352760286	143.029813163505	196.498009306519	516.29330339924	162.697299217393	408.011550255382	446.722334336225	266.047082582847	296.164699834896	247.261049508319	250.588445834248	203.227795307142	186.468382293785	196.116735441315	156.569675269229	401.051550538578	401.993139911908	318.362315346953	247.330470541638	212.501109309639	151.70425100956	164.320633938103	291.81829082319	166.832592390975
YBR017C	18.9433888230533	5.93722396513912	6.86628151070895	8.28080423460654	8.44450041828552	12.0113158782189	8.09067058255958	12.4495705174125	8.794520638871	7.01332213459113	12.6557723873321	7.00337689567408	18.0714330830186	7.89682723747149	10.2235136464071	10.8713318573434	14.4556435458373	13.6997879544064	12.7531425551838	12.7245263785876	7.3402764345918	12.8648324194739	8.6649098168683	9.712544352406	17.2538223374423	11.9582327287081	10.8736115270501	8.80853145167156	8.11462952297431	8.90383229547924	11.8019869908582	8.75926145757304	5.9690050579485	10.2125758563757	3.26776717411875	10.2853466573758	8.04862555671849	7.81019402277635	14.0083382458082	4.996904529869	9.75794526857855	15.7406952375145	13.9225502338318	9.44009429548238	7.04423566772283	5.53665149669926	9.32824559473948	10.2136401788117	11.6057455576331
YBR020W	4.05929760494	2.54452455648819	10.7898709453998	8.28080423460654	16.1852924683806	12.7620231206075	19.8589187026462	21.3421208869929	12.7031964783692	27.4157137988562	3.16394309683302	7.00337689567408	8.60544432524694	11.8452408562072	11.501452852208	23.2957111228787	26.0201583825071	13.6997879544064	33.7583185284276	28.2152541438247	2.0972218384548	4.28827747315795	16.4633286520498	11.4784615073889	26.8392791915768	31.8886206098882	20.0743597422463	29.813491067196	14.200601665205	22.6643003884926	3.37199628310233	5.83950763838202	13.6434401324537	14.9784445893511	11.9818129717688	19.6356618004448	14.0850947242574	31.2407760911054	21.4245173171184	31.6470620225037	3.90317810743142	1.81623406586705	12.0662102026542	12.2721225841271	23.4807855590761	17.7172847894376	18.656491189479	13.1318230870436	17.4086183364496
YBR021W	23.0026864279933	24.5970707127192	16.675255097436	15.181474430112	12.6667506274283	16.5155593325509	22.8009807326679	12.4495705174125	18.5662102376165	14.0266442691823	22.1476016778312	19.2592864631037	13.7687109203951	8.55489617392745	7.66763523480532	9.31828444915147	17.3467722550047	20.8758673590954	18.754621404682	15.4907277652371	35.6527712537316	20.3693179975003	12.9973647253024	7.06366861993164	8.62691116872113	6.64346262706004	4.18215827963465	8.80853145167156	8.11462952297431	5.66607509712315	20.231977698614	22.6280920987303	10.2325800993403	17.7017981510513	9.80330152235626	20.5706933147517	22.1337202809759	14.6441137927057	23.0725571107429	21.6532529627657	25.3706576983042	42.9842062255203	8.35353014029906	8.49608486593414	6.45721602874593	3.32199089801956	7.89313088785648	5.83636581646381	5.80287277881653
YBR022W	10.8247936131733	5.08904911297639	6.86628151070895	12.4212063519098	12.6667506274283	11.2606086358302	9.56170159757041	4.1498568391375	17.589041277742	8.92604635311598	9.49182929049907	7.00337689567408	14.6292553529198	12.5033097926632	3.83381761740266	10.8713318573434	5.20403167650141	9.13319196960425	3.7509242809364	8.85184443727834	13.6319419499562	10.7206936828949	8.6649098168683	7.06366861993164	10.544002539548	11.9582327287081	19.2379280863194	10.8412694789804	11.1576155940897	11.3321501942463	5.0579944246535	7.29938454797753	8.52715008278356	13.616767808501	10.8925572470625	11.2203781716827	10.0607819458981	10.7390167813175	9.06421886493471	8.32817421644833	5.85476716114713	10.2919930399133	5.56902009353271	13.2161320136753	12.9144320574919	12.1806332927384	12.916032361947	8.75454872469571	8.70430916822479
YBR023C	86.5983489053866	72.0948624338322	107.898709453998	113.170991206289	100.630296651236	112.606086358302	103.707686558264	99.5965641393	108.465754546076	117.951326809033	101.246179098657	78.7879900763334	102.404787470439	95.4199957861139	94.5675012292656	114.925508206201	91.3596672096914	96.5508865358163	129.781980120399	123.372581844567	89.131928134329	65.3962314656587	93.5810260221776	105.072070721483	80.5178375747305	75.7354739484845	168.95919449724	100.281742680568	142.00601665205	123.034773537531	79.2419126529048	62.7747071126068	84.4187858195573	102.806596954182	101.300782397681	70.1273635730171	117.711148767008	93.7223282733162	94.7622881334083	154.904040425939	79.0393566754862	85.9684124510405	101.170531699177	107.617074968499	76.8995727059743	122.913663226724	96.1526853611608	199.895529213885	166.832592390975
YBR024W	28.41508323458	29.6861198256956	33.350510194872	34.5033509775272	23.2223761502852	28.5268752107698	27.2140737777004	26.6776511087411	25.4063929567384	22.3151158827899	37.9673171619963	22.7609749109407	35.2823217335124	34.2195846957098	43.4499329972302	20.1896163064948	29.489512833508	30.6614301836714	21.7553608294311	27.1087735891649	38.7986040114138	28.9458729438162	25.1282384689181	22.0739644372864	46.010192899846	23.9164654574162	25.9293813337348	23.7152769852696	25.3582172592947	29.1398147852048	37.0919591141257	37.9567996494832	34.9613153394126	36.0844346925276	34.8561831906	34.5961660293551	27.1641112539249	28.3119533325643	24.7205969043674	26.6501574926347	40.007575601172	33.903035896185	27.8451004676635	36.8163677523813	32.8730997827065	28.7905877828362	22.9618353101279	30.640920536435	17.4086183364496
YBR025C	39.2398768477533	29.6861198256956	32.3696128361993	19.3218765474153	19.7038343093329	22.5212172716604	21.3299497176571	33.7916914044053	30.2922377561112	29.3284380173811	55.3690041945779	29.7643518066148	18.0714330830186	21.0582059665906	26.8367233218186	20.1896163064948	28.333061349841	26.747205053841	32.257948816053	29.3217346984845	34.6041603345042	36.4503585218426	14.7303466886761	15.0102958173547	23.005096449923	17.2730028303561	97.8625037434507	25.0704356701421	165.335576530601	63.9457046675327	28.6619684063698	34.3071073754944	21.3178752069589	23.8293436648767	29.4099045670688	28.9859769435137	21.127642086386	34.1695988496465	23.8965770075551	38.3096013956623	26.3464522251621	37.5355040279191	8.35353014029906	23.6002357387059	28.7639623098682	26.5759271841565	31.5725235514259	91.922761609305	94.2966826557686
YBR029C	46.0053728559866	42.4087426081366	17.6561524561087	17.9417425083142	23.2223761502852	24.0226317564377	15.4458256576137	16.0065906652446	14.6575343981183	10.2011958321325	55.3690041945779	43.771105597963	10.3265331902963	13.8194476655751	21.7249664986151	12.4243792655353	19.6596752223387	20.8758673590954	13.503327411371	17.7036888745567	53.4791568805974	50.3872603096059	14.7303466886761	8.82958577491455	19.1709137082692	21.2590804065921	6.69145324741543	17.6170629033431	16.2292590459486	10.5227108946573	60.695933095842	45.2561841974607	15.3488701490104	10.2125758563757	19.6066030447125	19.6356618004448	19.1154856972064	15.6203880455527	7.41617907131022	9.993809059738	50.7413153966084	56.3032560418786	5.56902009353271	12.2721225841271	19.3716480862378	7.75131209537897	20.8091632498034	10.2136401788117	13.0564637523372
YBR030W	21.6495872263466	16.9634970432546	4.90448679336354	8.28080423460654	10.5556255228569	9.00848690866415	18.3878876876354	14.2280805913286	16.6118723178674	10.2011958321325	17.4016870325816	7.00337689567408	8.60544432524694	8.55489617392745	12.7793920580089	15.5304740819191	19.0814494805052	7.17607940468905	8.25203341806007	13.2777666559175	24.1180511422302	13.9369017877633	5.19894589012098	2.64887573247436	9.58545685413459	11.9582327287081	3.34572662370772	6.77579342436274	8.11462952297431	2.42831789876707	28.6619684063698	13.1388921863596	7.67443507450521	6.12754551382544	7.62479007294375	13.0904412002965	6.03646916753887	14.6441137927057	13.1843183489959	11.6594439030277	11.7095343222943	23.6110428562717	0.928170015588784	2.83202828864471	10.5663535015842	2.21466059867971	3.58778676720749	10.2136401788117	5.80287277881653
YBR031W	316.62521318532	220.52546156231	35.3123049122174	22.0821446256174	60.5189196643795	54.0509214519849	52.2216010328845	56.3194856740089	75.2420099103407	52.2811286396793	235.71376071406	231.111437557244	36.1428661660371	37.5099293779896	58.7852034668408	83.8645600423632	59.5572514088495	73.065535756834	51.012570220735	52.5578263463401	288.368002787535	276.593897018688	45.0575310477151	35.3183430996582	67.0981979789421	71.7493963722485	56.8773526030312	65.0476168738823	69.9886796356534	57.4701902708206	266.387706365084	221.171351803719	35.814030347691	51.7437176723038	51.1950190611938	60.7770484299482	53.32214431326	66.386649193599	56.857372880045	44.972140768821	201.989467059576	336.003302185405	37.1268006235514	49.0884903365084	68.0942781213207	54.2591846676528	78.9313088785648	40.8545607152467	49.3244186199405
YBR033W	25.7088848312866	16.9634970432546	31.3887154775266	41.4040211730327	34.4817100413325	41.2888983313774	33.8337133452491	34.9773647870161	20.5205481573657	20.4023916642651	18.9836585809981	15.7575980152667	34.4217773009877	38.8260672509015	31.9484801450222	38.8261852047978	38.7411247028438	26.0948341988693	24.7561002541802	24.8958124798453	7.3402764345918	21.4413873657898	38.1256031942205	35.3183430996582	36.4247360457114	42.5181608131843	19.2379280863194	33.2013877793774	20.2865738074358	19.4265431901365	13.4879851324093	13.1388921863596	24.7287352400723	31.9994043499773	35.9454389153063	43.0114496581172	34.2066586160536	38.0746958610347	27.1926565948041	38.3096013956623	28.2980412788778	16.3461065928035	34.342290576785	58.5285846319907	52.2447478689443	34.3272392795354	29.4198514911014	8.75454872469571	27.5636456993785
YBR034C	50.0646704609266	44.105092312462	14.7134603800906	13.8013403910109	13.3704589956187	13.5127303629962	16.1813411651192	27.2704878000464	25.4063929567384	20.4023916642651	53.7870326461614	38.5185729262074	17.2108886504939	11.1871719197513	12.7793920580089	6.21218963276765	12.7209663203368	20.8758673590954	22.5055456856184	22.6828513705257	40.8958258498686	52.5313990461849	19.9292925787971	13.2443786623718	13.4196395957884	25.2451579828282	17.5650647744655	21.0049596155245	21.3009024978076	23.4737396880816	45.5219498218815	34.3071073754944	11.938010115897	12.2550910276509	16.3388358705938	18.7006302861379	26.1580330593351	26.3594048268702	19.7764775234939	21.6532529627657	30.2496303325935	113.817334794335	27.8451004676635	10.3841037250306	42.265414006337	21.0392756874572	34.4427529651919	23.3454632658552	17.4086183364496
YBR035C	50.0646704609266	48.3459665732757	91.2234543565617	91.0888465806719	85.1487125510456	69.8157735421472	66.1963956754874	65.8048727348946	62.5388134319715	61.8447497323036	42.7132318072458	54.2761709414741	78.3095433597471	80.2844102476269	69.0087171132479	100.948081532474	72.8564434710197	60.6704895123711	60.0147884949824	58.643469396969	47.187491365233	54.6755377827639	84.0496252236225	102.423194989009	81.476383260144	67.7633187960124	49.3494676996888	70.4682516133725	27.3868746400383	42.9002828782182	72.4979200867002	64.2345840222023	86.9769308443924	91.9131827073817	88.2297137012063	76.6725841731654	71.4315518158766	80.0544887334576	60.9774723641062	76.6192027913247	76.1119730949127	53.8816106207226	96.5296816212336	109.505093827596	72.203415594159	58.6885058650122	68.8855059303838	37.9363778070148	46.4229822305322
YBR036C	63.5956624773933	72.9430372859949	57.8729441616897	62.106031759549	40.8150853550467	42.7903128161547	44.8664459578304	43.2770784652911	43.972603194355	52.9187033791876	64.860833485077	84.0405227480889	61.0986547092532	69.0972383278756	58.7852034668408	52.803611878525	43.9451563793452	54.7991518176255	49.5122005083604	54.7707874556597	61.8680442344166	98.6303818826329	55.4554228279571	60.9241418469104	55.5956497539806	47.8329309148323	45.1673094200542	45.3978159432303	68.9743509452816	46.9474793761633	87.6719033606607	84.6728607565393	53.7210455215365	58.5521015765542	60.99832058355	57.0369223727206	47.2856751457211	58.5764551708226	53.561293292796	36.6439665523727	81.9667402560598	62.3573695947688	62.1873910444486	60.4166034910872	45.2005122012215	35.4345695788753	35.1603103186334	43.7727436234786	66.7330369563901
YBR037C	24.35578562964	25.4452455648819	38.2549969882356	26.2225467429207	25.3335012548566	37.535362119434	36.7757753752708	37.9415482435428	39.0867583949822	29.9660127568894	26.8935163230807	33.2660402544519	25.8163329757408	44.7486876790051	37.0602369682257	29.5079007556463	38.1628989610103	39.1422512983039	36.7590579531767	32.087936085134	17.8263856268658	37.5224278901321	41.5915671209678	46.7968046070471	41.2174644727787	53.1477010164803	192.379280863194	43.3650779159215	90.2752534430892	130.319727233833	23.6039739817163	29.1975381919101	37.5194603642477	32.6802427404024	31.5884160164813	42.0764181438103	28.1701894485147	41.9797928724229	46.1451142214858	56.6315846718487	27.3222467520199	20.5839860798266	52.9056908885607	43.4244337592189	50.4836889520136	111.840360233325	69.6030632838253	234.913724112668	171.184746975088
YBR038W	6.76549600823333	6.78539881730185	7.84717886938166	5.52053615640436	5.62966694552368	7.50707242388679	13.2392791350975	7.70687698696964	7.81735167899644	6.37574739508284	6.32788619366604	3.50168844783704	12.0476220553457	12.5033097926632	15.3352704696106	10.8713318573434	3.46935445100094	11.7426753894912	8.25203341806007	9.40508471460823	7.3402764345918	3.21620810486846	15.5968376703629	16.7762129723376	1.91709137082692	5.31477010164803	5.01858993556158	1.35515868487255	1.01432869037179	3.23775719835609	16.8599814155117	7.29938454797753	11.938010115897	9.53173746595069	7.62479007294375	9.35031514306895	6.03646916753887	5.85764551708226	8.24019896812246	11.6594439030277	4.87897263428927	7.26493626346821	9.28170015588784	15.1041508727718	3.52211783386142	5.53665149669926	3.58778676720749	4.37727436234786	0
YBR039W	278.738435539213	245.122532275029	155.96268002896	183.557827200445	145.667632215425	185.424688870004	166.226504696224	172.515477169859	159.278540459552	158.118535398054	295.828679553888	187.340331959282	154.03745342192	148.723579639046	144.4071302555	152.198646002807	167.107239389879	161.78797203299	162.039928936452	156.566998484361	226.499958553119	261.584925862635	146.436975905074	169.528046878359	185.957862970211	205.947341438861	96.1896404315969	205.984120100627	81.1462952297431	169.982252913695	251.213723091124	232.850367080483	166.279426614279	147.061092331811	189.530496098888	154.280199860638	193.167013361244	166.942897236845	177.164277814633	134.916422306463	219.553768543017	242.164542115607	151.291712540972	151.985518157266	208.3919718368	171.636196397677	203.068731023944	116.727316329276	142.170383081005
YBR041W	17.5902896214067	25.4452455648819	33.350510194872	28.9828148211229	38.0002518822848	39.0367766042113	46.3374769728412	39.1272216261536	34.2009135956094	44.6302317655799	17.4016870325816	31.5151960305333	39.5850438961359	32.2453778863419	39.6161153798275	34.1670429802221	37.5846732191768	41.7517347181909	53.2631247892968	49.2383846823607	26.215272980685	36.4503585218426	43.3245490843415	30.9035502122009	54.6371040685671	35.8746981861242	48.5130360437619	35.9117051491225	33.472846782269	46.1380400765742	10.115988849307	25.5478459179214	31.5504553062992	22.4676668840266	39.213206089425	45.8165442010378	37.224893199823	36.1221473553406	29.6647162852409	26.6501574926347	26.3464522251621	26.0326882774278	46.4085007794392	40.5924054705742	47.5485907571291	39.8638907762347	36.5954250255164	39.3954692611307	37.7186730623074
YBR042C	5.41239680658666	6.78539881730185	6.86628151070895	6.90067019550545	6.33337531371414	12.7620231206075	9.56170159757041	13.0424072087179	10.7488585586201	11.4763453111491	6.32788619366604	1.75084422391852	5.16326659514816	7.23875830101554	6.38969602900444	12.4243792655353	8.09516038566886	9.13319196960425	11.2527728428092	9.40508471460823	7.3402764345918	5.36034684144744	10.397891780242	14.1273372398633	15.3367309666153	9.30084767788406	8.36431655926929	12.8740075062892	7.10030083260252	9.71327159506826	10.115988849307	13.1388921863596	5.9690050579485	7.48922229467554	16.3388358705938	13.0904412002965	10.0607819458981	10.7390167813175	9.06421886493471	8.32817421644833	5.85476716114713	7.26493626346821	13.9225502338318	8.49608486593414	13.5014516964688	12.1806332927384	5.74045882753199	4.37727436234786	7.25359097352066
YBR043C	37.8867776461066	39.8642180516484	56.892046803017	74.5272381114588	49.9632941415227	43.5410200585434	47.0729924803466	38.5343849348482	42.9954342344804	36.3417601519722	34.8033740651632	49.0236382697185	59.3775658442039	53.9616527893885	52.3955074378364	49.6975170621412	35.2717702518429	39.7946221532757	37.509242809364	38.7268194130927	45.0902695267782	46.098982836448	62.3873506814517	53.8604732269787	46.9687385852595	42.5181608131843	30.9479712692964	50.1408713402842	28.4012033304101	56.6607509712315	35.4059609725745	29.9274766467079	49.4574704801447	46.9778489393284	54.4627862353125	35.531197543662	35.2127368106434	40.0272443667288	44.4970744278613	21.6532529627657	23.4190686445885	36.3246813173411	45.4803307638504	58.5285846319907	32.2860801437296	39.8638907762347	43.7709985599314	26.2636461740871	55.127291398757
YBR044C	36.53367844446	23.7488958605565	19.6179471734541	15.181474430112	15.4815841001901	13.5127303629962	15.4458256576137	11.8567338261071	14.6575343981183	8.92604635311598	20.5656301294146	28.0135075826963	12.9081664878704	9.87103404683937	20.4470272928142	21.7426637146868	15.0338692876707	16.3092713742933	12.7531425551838	6.63888332795875	16.7777747076384	22.5134567340792	17.3298196337366	22.0739644372864	12.461093910375	13.2869252541201	10.8736115270501	12.8740075062892	9.1289582133461	21.0454217893146	30.347966547921	20.4382767343371	15.3488701490104	19.0634749319014	10.8925572470625	14.0254727146034	23.1397984755657	14.6441137927057	14.8323581426204	14.990713589607	17.5643014834414	21.7948087904046	21.347910358542	16.9921697318683	17.0235695303302	18.8246150887775	14.35114706883	7.29545727057976	14.5071819470413
YBR045C	24.35578562964	20.3561964519056	41.1976890642537	64.8662998377512	33.0742933049516	36.0339476346566	30.156135807722	26.0848144174357	85.9908684689608	47.8181054631213	30.0574594199137	43.771105597963	52.4932103840063	45.4067566154611	33.2264193508231	31.0609481638382	30.0677385753415	17.6140130842368	98.2742161605336	73.5809568848762	25.1666620614576	23.5855261023687	53.7224408645834	39.7331359871155	33.5490989894711	29.2312355590642	1382.62152724721	111.800591501985	870.294016338994	1021.51239608135	25.2899721232675	24.0879690083258	63.9536256208767	49.0203641106036	34.8561831906	43.0114496581172	20.1215638917962	24.4068563211761	39.5529550469878	201.54181603805	13.66112337601	16.3461065928035	58.4747109820934	49.0884903365084	27.5899230319144	826.06840330753	254.732860471732	1574.35967899111	1159.1238375686
YBR046C	121.7789281482	157.760522502268	102.013325301962	114.55112524539	73.8893786599983	79.5749676932	58.1057250929279	63.4335259696732	51.7899548733514	43.9926570260716	167.68898413215	140.067537913482	108.428598498111	92.1296511038341	85.6219267886594	69.887133368636	61.2919286343499	62.6276020772863	44.2609065150495	44.2592221863917	122.687477549606	120.071769248423	80.5836612968752	93.5936092140942	39.3003731019518	59.7911636435404	27.6022446455887	38.6220225188676	27.3868746400383	26.7114968864377	178.715803004424	194.163628976202	95.5040809271759	87.8281523648314	69.7123663812	75.7375526588585	52.3160661186702	63.4578264350579	69.2176713322287	33.3126968657933	126.853288491521	109.579455307312	86.3198114497569	103.841037250306	39.9173354504294	31.0052483815159	41.6183264996069	26.2636461740871	31.9158002834909
YBR047W	31.1212816378733	29.6861198256956	20.5988445321268	20.7020105865163	28.8520430958089	18.767681059717	22.0654652251625	12.4495705174125	8.794520638871	3.18787369754142	42.7132318072458	31.5151960305333	29.2585107058396	19.0839991572228	20.4470272928142	20.1896163064948	15.0338692876707	8.48082111463252	9.00221827424735	7.74536388261854	16.7777747076384	19.2972486292108	21.6622745421707	15.8932543948462	8.62691116872113	13.2869252541201	13.3829064948309	8.80853145167156	15.2149303555768	4.85663579753413	25.2899721232675	28.4675997371124	23.876020231794	23.8293436648767	23.9636259435375	10.2853466573758	17.1033293080268	5.85764551708226	15.6563780394327	13.3250787463173	27.3222467520199	24.2164542115607	14.8507202494205	22.6562263091577	12.327412418515	12.1806332927384	12.916032361947	16.0500059952755	11.6057455576331
YBR048W	56.8301664691599	24.5970707127192	18.6370498147814	15.181474430112	26.037209623047	33.0311186651019	33.8337133452491	37.3487115522375	35.178082555484	48.4556802026296	23.7295732262477	22.7609749109407	14.6292553529198	18.4259302207668	19.1690880870133	24.8487585310706	37.0064474773434	37.8375095883605	36.7590579531767	37.067098581103	37.7499930921864	18.2251792609213	22.5287655238576	15.0102958173547	21.0880050790961	18.6016953557681	35.966561204858	21.0049596155245	47.6734484474741	27.5209361860267	33.7199628310233	35.7669842850899	6.82172006622685	19.7443133223264	26.14213739295	26.1808824005931	33.2005804214638	55.6476324122815	44.4970744278613	53.3003149852693	34.1528084400249	42.9842062255203	7.42536012471027	12.2721225841271	19.9586677252147	33.2199089801956	41.6183264996069	21.8863718117393	46.4229822305322
YBR049C	6.76549600823333	7.63357366946458	15.6943577387633	5.52053615640436	19.7038343093329	16.5155593325509	26.478558270195	24.899141034825	14.6575343981183	25.5029895803314	15.8197154841651	12.2559095674296	13.7687109203951	13.1613787291192	14.0573312638098	23.2957111228787	26.0201583825071	27.3995759088127	27.0066548227421	28.2152541438247	4.1944436769096	8.5765549463159	16.4633286520498	18.5421301273205	21.0880050790961	22.5877729320041	33.4572662370772	16.9394835609068	29.4155320207819	38.853086380273	5.0579944246535	10.2191383671685	16.2015851572888	16.3401213702012	14.1603244211813	21.5057248290586	36.2188150052332	16.5966622983997	28.8406963884286	26.6501574926347	15.6127124297257	13.9244611716474	16.7070602805981	13.2161320136753	25.2418444760068	32.1125786808557	24.3969500170109	72.9545727057976	68.1837551510942
YBR050C	71.7142576872733	92.4510588857377	71.6055071831076	45.544423290336	45.0373355641894	25.5240462412151	31.6271668227329	27.2704878000464	32.2465756758603	32.5163117149225	104.41012219549	115.555718778622	67.1224657369261	57.2519974716683	39.6161153798275	40.3792326129897	28.9112870916745	27.3995759088127	23.2557305418057	21.5763708158659	52.43054596137	110.423144933817	51.122967919523	67.987810466842	19.1709137082692	54.4763935418923	52.6951943233965	29.813491067196	48.6877771378458	67.1834618658888	65.7539275204955	100.73150676209	61.3954805960417	54.4670712340039	44.6594847129563	35.531197543662	38.2309713944128	16.5966622983997	25.5446168011796	31.6470620225037	66.3540278263341	85.3630010957515	63.1155610600373	75.520754363859	26.4158837539606	42.0785513749144	50.2290147409049	70.0363897975657	69.6344733457983
YBR052C	112.307233736673	139.100675754688	86.3189675631982	88.3285785024697	81.6301707100933	84.8299183899208	58.8412406004333	48.0197719957339	61.561644472097	61.2071749927953	132.885610066987	138.316693689563	78.3095433597471	94.103857913202	71.5645955248497	65.2279911440603	71.1217662455193	79.5892443065513	65.2660824882933	57.5369888423092	106.958313761195	137.224879141054	107.444881729167	100.657277834026	95.8545685413459	94.3371693042526	110.408978582355	102.992060050314	162.292590459486	93.0855194527375	123.077864333235	138.688306411573	104.883946018238	103.487435344608	64.2660877576688	99.1133405165308	75.4558645942359	76.1493917220694	67.5696315386042	61.6284892017177	136.6112337601	124.714739189538	96.5296816212336	101.95301839121	90.9880440414199	66.4398179603912	95.4351280077193	175.090974493914	120.409610160443
YBR053C	55.4770672675133	50.0423162776012	109.860504171343	88.3285785024697	103.445130123998	98.342648752917	111.798357140823	88.9255036958036	99.6712339072046	70.7707960854195	50.6230895493284	91.043899643763	84.33335438742	85.5489617392745	97.1233796408674	111.819413389818	97.1419246280263	91.3319196960425	77.2690401872898	72.4744763302164	54.5277677998248	65.3962314656587	116.109791546035	107.720946453957	138.989124384952	106.295402032961	82.806733936766	115.866067556603	69.9886796356534	72.849536963012	74.1839182282513	66.4243993865955	82.7133558030006	111.657496029708	78.42641217885	98.1783090022239	117.711148767008	110.318990571716	97.2343478238451	83.2817421644833	55.6202880308977	40.5625608043642	103.026871730355	123.665235270819	132.079418769803	89.6937542465281	96.1526853611608	52.5272923481743	79.7895007087273
YBR054W	377.51467725942	463.951644133014	247.186134385522	165.616084692131	66.1485866099032	60.0565793910943	31.6271668227329	29.0489978739625	31.2694067159858	19.7648169247568	553.690041945779	379.933196590319	144.571464664149	121.742753244352	66.4528387016461	41.9322800211816	28.9112870916745	30.0090593286997	25.5062851103675	28.7684944211546	472.923524571558	504.944672464349	171.565214373992	232.218105880253	59.4298324956344	135.526637592025	64.4052375063736	73.1785689831175	48.6877771378458	102.798791047806	429.929526095547	339.421381480955	126.201821225197	113.700011200983	86.0512022517938	57.0369223727206	31.1884240322842	24.4068563211761	32.1367759756776	29.981427179214	326.891166497381	200.996569955954	134.584652260374	232.226319668866	81.5957298177895	81.9424421511491	89.6946691801873	100.677310334001	100.099555434585
YBR055C	35.1805792428133	38.1678683473229	35.3123049122174	41.4040211730327	26.7409179912375	31.5297041803245	32.3626823302383	29.6418345652678	38.1095894351076	32.5163117149225	47.4591464524953	26.2626633587778	37.8639550310865	28.2969642676062	33.2264193508231	27.9548533474544	29.489512833508	26.0948341988693	32.257948816053	22.6828513705257	47.187491365233	40.7386359950005	38.1256031942205	45.9138460295556	30.6734619332307	34.5460056607122	36.8029928607849	30.4910704096323	28.4012033304101	29.1398147852048	35.4059609725745	37.2268611946854	31.5504553062992	25.1910204457268	33.7669274658938	30.8560399721275	34.2066586160536	28.3119533325643	35.4328555629266	36.6439665523727	32.2012193863092	31.4813904750289	41.7676507014953	43.4244337592189	34.0471390606604	32.1125786808557	36.5954250255164	33.5591034446669	37.7186730623074
YBR056W	40.5929760494	67.8539881730185	80.433583411162	66.2464338768523	43.6299188278085	43.5410200585434	61.7833026304549	53.9481389087875	38.1095894351076	41.4423580680385	44.2952033556623	61.2795478371482	61.9591991417779	64.4907557726839	49.8396290262346	54.3566592867169	45.1016078630122	39.1422512983039	42.0103519464876	50.8981055143504	54.5277677998248	61.1079539925008	63.2538416631386	79.4662719742309	56.5541954393941	42.5181608131843	30.9479712692964	34.55654646425	34.4871754726408	33.1870112831499	87.6719033606607	76.6435377537641	62.24819560432	70.8071926042051	54.4627862353125	40.2063551151965	44.2674405619517	53.6950839065874	37.0808953565511	36.6439665523727	62.4508497189027	39.9571494490752	63.1155610600373	48.1444809069601	35.8081979775911	35.4345695788753	40.9007691461654	20.4272803576233	18.8593365311537
YBR056W-A	154.25330898772	279.049526361539	12.7516656627452	22.0821446256174	16.889000836571	16.5155593325509	12.5037636275921	13.0424072087179	14.6575343981183	17.2145179667237	202.492358197313	309.899427633578	14.6292553529198	25.6646885217824	19.1690880870133	29.5079007556463	9.82983761116933	16.3092713742933	12.0029576989965	16.043968042567	165.680525237929	276.593897018688	14.7303466886761	15.8932543948462	15.3367309666153	14.6156177795321	12.5464748389039	16.2619042184706	21.3009024978076	8.90383229547924	301.793667337659	258.398212998405	7.67443507450521	19.7443133223264	15.2495801458875	9.35031514306895	13.0790165296675	20.5017593097879	14.0083382458082	14.990713589607	199.062083479002	158.012363730434	17.6352302961869	27.3762734568989	12.9144320574919	17.7172847894376	15.0687044222715	21.8863718117393	8.70430916822479
YBR057C	43.2991744526933	43.2569174602993	65.7201230310714	62.106031759549	87.259837655617	90.8355763290302	86.7908298856391	132.7954188524	121.168951024445	131.340396338707	15.8197154841651	10.5050653435111	18.9319775155433	13.8194476655751	19.1690880870133	13.9774266737272	18.5032237386717	19.571125649152	13.503327411371	17.1504485972268	46.1388804460056	45.0269134681585	81.450152278562	87.412899171654	145.698944182846	128.883174964965	121.282590109405	158.553566130088	78.1033091586277	123.034773537531	50.579944246535	55.4753225646292	60.5427655877633	77.6155765084556	88.2297137012063	102.853466573758	123.747617934547	108.366442066022	103.826506998343	89.944281537642	34.1528084400249	38.1409153832081	90.9606615277009	65.1366506388284	147.928949022179	138.416287417482	129.16032361947	119.645499237508	104.451710018697
YBR058C	48.71157125928	78.0320863989713	75.5290966177984	78.6676402287621	86.5561292874266	69.0650662997585	77.2291282880687	95.4467073001625	79.150685749839	82.2471413965687	69.6067481303265	47.2727940458	74.0068211971236	75.0198587559792	61.3410818784426	80.7584652259794	76.9040236638542	71.1084231919188	77.2690401872898	76.9003985488555	63.9652660728714	47.1710522047374	53.7224408645834	65.3389347343677	46.010192899846	27.9025430336522	30.1115396133695	52.8511887100293	68.9743509452816	33.9964505827389	82.6139089360072	54.7453841098315	77.5970657533304	95.3173746595069	90.4082251506188	82.2827732590067	75.4558645942359	101.532522296093	75.8098305067267	74.953567948035	48.7897263428927	56.3032560418786	42.6958207170841	64.1926412092802	46.3745514791753	37.649230177555	52.3816868012294	33.5591034446669	36.2679548676033
YBR058C-A	50.0646704609266	58.5240647992285	103.975120019307	111.790857167188	126.667506274283	170.41054402223	164.755473681213	148.209172826339	161.232878379302	180.433651280844	49.0411180009118	63.0303920610667	70.5646434670249	88.8393064215543	145.685069461301	150.645598594615	156.699176036876	168.311680582707	180.794550341134	162.652641534989	56.6249896382796	63.2520927290798	128.240665289651	112.135739341415	162.952766520288	182.030875981445	129.646906668674	182.268843115358	105.490183798666	126.272530735887	45.5219498218815	45.2561841974607	63.9536256208767	104.168273735033	138.335477037694	153.345168346331	181.094075026166	184.515833788091	187.05251657638	168.229119172256	47.8139318160349	54.4870219760116	142.010012385084	117.057169263981	198.412637974193	171.636196397677	177.23666630005	147.368236865711	126.212482939259
YBR059C	40.5929760494	63.6131139122049	30.4078181188539	38.6437530948305	40.1113769868562	29.2775824531585	29.4206203002166	30.8275079478786	32.2465756758603	34.4290359334473	60.1149188398274	43.771105597963	47.3299437888581	47.380963424829	26.8367233218186	29.5079007556463	31.802415800842	43.0564764281343	32.257948816053	47.0254235730412	31.458327576822	38.5944972584216	31.1936753407259	21.1910058597949	34.5076446748845	26.5738505082402	20.9107913981732	23.0376976428333	49.7021058282176	19.4265431901365	43.8359516803303	47.4459995618539	25.5814502483507	38.1269498638028	37.0346946400125	44.8815126867309	28.1701894485147	37.0984216081877	39.5529550469878	44.972140768821	40.007575601172	44.1950289360983	32.4859505456075	33.9843394637366	25.2418444760068	23.2539362861369	21.5267206032449	36.4772863528988	30.4650820887868
YBR060C	12.17789281482	6.78539881730185	9.80897358672707	11.0410723128087	11.9630422592378	14.2634376053849	12.5037636275921	13.0424072087179	9.77168959874555	7.65089687409941	7.90985774208256	7.00337689567408	11.187077622821	11.8452408562072	11.501452852208	15.5304740819191	13.2991920621703	13.6997879544064	10.5025879866219	7.74536388261854	9.4374982730466	10.7206936828949	14.7303466886761	8.82958577491455	7.66836548330767	9.30084767788406	10.0371798711232	5.42063473949019	12.1719442844615	11.3321501942463	3.37199628310233	5.10956918358427	5.9690050579485	8.17006068510059	14.1603244211813	12.1554096859896	10.0607819458981	14.6441137927057	11.5362785553714	9.993809059738	3.90317810743142	7.26493626346821	10.2098701714766	5.66405657728943	9.39231422363044	7.75131209537897	5.74045882753199	1.45909145411595	4.3521545841124
YBR061C	20.2964880247	17.8116718954174	6.86628151070895	12.4212063519098	13.3704589956187	9.75919415105283	11.7682481200867	15.4137539739393	9.77168959874555	8.28847161360769	26.8935163230807	17.5084422391852	7.74489989272224	5.92262042810362	11.501452852208	6.21218963276765	11.5645148366698	12.3950462444629	9.75240313043463	8.29860415994844	22.0208293037754	15.0089711560528	11.2643827619288	4.41479288745727	7.66836548330767	15.9443103049441	12.5464748389039	7.45337276679901	18.2579164266922	9.71327159506826	25.2899721232675	32.8472304658989	5.11629004967014	8.85089907552564	13.071068696475	6.54522060014826	12.0729383350777	6.83391976992931	4.12009948406123	6.66253937315867	17.5643014834414	24.2164542115607	4.64085007794392	4.72004714774119	11.1533731405612	12.1806332927384	9.32824559473948	13.1318230870436	14.5071819470413
YBR062C	46.0053728559866	45.8014420167875	128.497553986125	125.592197558199	104.852546860379	92.3369908138076	118.417996708372	100.782237521911	135.826485422563	125.602223683132	49.0411180009118	47.2727940458	97.2415208752904	129.639580481824	132.905677403292	99.3950341242823	113.332245399364	103.726965940505	111.777543571905	118.393419348598	47.187491365233	32.1620810486846	127.374174307964	121.848283693821	166.786949261942	130.211867490377	172.304921120947	130.095233747765	57.8167353511919	140.032998828901	38.7779572556768	54.0154456550337	111.705666084465	118.465879933959	104.5685495718	110.333718688214	109.662523210289	132.773298387198	121.1309248314	129.919517776594	40.007575601172	34.508447251474	128.087462151252	126.497263559464	146.167890105249	170.528866098337	114.091619197198	142.990962503363	152.325410443934
YBR063C	25.7088848312866	17.8116718954174	27.4651260428358	16.5616084692131	21.1112510457138	18.767681059717	13.2392791350975	13.6352439000232	38.1095894351076	21.0399664037734	25.3115447746642	31.5151960305333	19.792521948068	15.135585538487	21.7249664986151	17.083521490111	16.1903207713377	16.961642229265	32.257948816053	30.9814555304742	25.1666620614576	11.7927630511844	25.9947294506049	13.2443786623718	15.3367309666153	11.9582327287081	405.669353124561	64.370037531446	238.36724223737	367.485442013416	25.2899721232675	13.8688306411573	18.7597301821238	21.1059901031765	14.1603244211813	10.2853466573758	18.1094075026166	24.4068563211761	18.9524576266817	84.947377007773	13.66112337601	20.5839860798266	7.42536012471027	13.2161320136753	25.8288641149837	329.984429203276	113.374061843757	427.513796055974	400.39822173834
YBR065C	9.47169441152666	3.39269940865093	1.96179471734541	4.14040211730327	2.81483347276184	6.00565793910943	2.20654652251625	4.1498568391375	4.88584479937278	4.46302317655799	7.90985774208256	5.25253267175556	0.860544432524693	1.97420680936787	3.83381761740266	0	1.15645148366698	2.60948341988693	2.25055456856184	3.31944166397938	9.4374982730466	7.50448557802641	3.46596392674732	1.76591715498291	1.91709137082692	3.98607757623602	5.01858993556158	2.03273802730882	6.08597214223073	1.61887859917804	11.8019869908582	4.37963072878652	3.41086003311343	3.40419195212525	5.44627862353125	0.935031514306895	1.00607819458981	0	6.59215917449797	0	5.85476716114713	6.05411355289018	0.928170015588784	3.77603771819295	0.587019638976903	2.21466059867971	5.02290147409049	2.9181829082319	2.90143638940826
YBR066C	35.1805792428133	41.5605677559738	26.4842286841631	12.4212063519098	23.2223761502852	11.2606086358302	12.5037636275921	7.11404029566428	7.81735167899644	8.28847161360769	28.4754878714972	35.0168844783704	12.9081664878704	22.3743438395026	12.7793920580089	17.083521490111	8.09516038566886	7.82845025966078	5.25129399331096	11.0648055465979	24.1180511422302	27.8738035755267	12.1308737436156	5.29775146494873	4.79272842706729	6.64346262706004	10.0371798711232	6.77579342436274	24.3438885689229	8.09439299589022	30.347966547921	54.7453841098315	17.0543001655671	22.4676668840266	5.44627862353125	14.0254727146034	12.0729383350777	8.7864682756234	4.12009948406123	8.32817421644833	26.3464522251621	30.8759791197399	10.2098701714766	25.4882545978024	4.10913747283832	9.96597269405867	8.61068824129798	2.9181829082319	17.4086183364496
YBR067C	1883.51408869216	2130.61522863278	1604.74807878855	1127.56950994559	980.969465257501	917.364250198966	700.210763145156	659.234400731557	433.863018184302	578.917863473522	1648.41435345	1894.41345027984	1622.98679974157	1186.49829243009	1051.74396637413	815.349889300754	748.224109932536	514.068233717725	512.376256775912	378.969589970979	1674.63163800616	1578.08611012213	1127.30476717457	898.851831886301	400.672096502826	530.148317639391	301.951827789621	567.133909619161	1172.56396606979	342.392823726156	1928.78187393453	1954.04524349358	1246.66934210296	1217.33904207999	737.426125626132	672.287658786657	674.072390375174	452.014979068181	550.445291070581	301.47990663543	1450.03066691077	1488.70652265569	956.943286072037	949.673486125527	493.683516379575	458.434743926699	464.977165030091	474.204722587684	330.763748392542
YBR068C	40.5929760494	71.2466875816694	265.823184200304	303.62948860224	216.038469034471	195.934590263445	187.556454413881	241.877370052586	234.520550369893	233.98992939954	68.02477658191	85.7913669720074	268.489862947704	300.737503960373	181.467367223726	254.699774943473	199.487880932554	255.077004293947	212.302314301	230.147955369237	42.9930476883234	35.3782891535531	124.774701362903	233.101064457744	85.3105660017978	201.961263862625	111.245410238282	154.48809007547	314.441894015254	217.739171589447	94.4158959268653	121.899721951225	282.248667740136	264.165295484919	257.064351030675	210.382090719051	224.355437393528	215.756609879197	257.918227702233	193.213641821601	72.2087949874812	47.8274970678324	126.231122120075	164.257640741393	97.4452600701658	126.235654124743	188.717583955114	176.55006594803	204.551265453283
YBR069C	140.722316971253	135.707976346037	28.4460234015085	17.9417425083142	27.4446263594279	23.2719245140491	33.8337133452491	31.4203446391839	65.4703203115952	64.3950486903367	129.721666970154	140.067537913482	33.561232868463	42.7744808696373	44.727872203031	24.8487585310706	31.2241900590085	42.4041055731626	64.515897632106	73.5809568848762	154.145805126428	186.540070082371	21.6622745421707	17.6591715498291	18.2123680228557	33.2173131353002	184.014964303924	63.0148788465734	227.209626643281	161.887859917804	131.507855040991	132.118860318393	22.1705902152373	14.297606198926	19.6066030447125	14.0254727146034	28.1701894485147	31.2407760911054	48.6171739119225	83.2817421644833	150.27235713611	216.737265193468	30.6296105144299	37.7603771819295	39.3303158114525	139.523617716821	77.4961941716818	252.42282156206	142.170383081005
YBR070C	9.47169441152666	5.93722396513912	54.9302520856716	69.0067019550545	69.6671284508555	81.8270894203661	63.2543336454658	43.2770784652911	42.9954342344804	51.643553900171	14.2377439357486	12.2559095674296	65.4013768718767	59.2262042810362	80.5101699654559	72.9932281850198	53.1967682486811	50.2325558328234	49.5122005083604	42.0462610770721	19.9236074653206	5.36034684144744	97.0469899489249	76.8173962417566	64.2225609227017	78.3928589993085	77.7881440012044	51.4960300251568	69.9886796356534	72.849536963012	8.42999070775583	8.02932300277528	57.9846205629282	63.9988086999546	84.9619465270875	57.9719538870275	56.3403788970294	58.5764551708226	42.8490346342368	46.6377756121107	3.90317810743142	16.9515179480925	103.955041745944	77.4087732229555	51.0707085909905	64.2251573617115	43.0534412064899	138.613688141015	79.7895007087273
YBR071W	94.7169441152666	89.9065343292495	145.172809083561	179.417425083142	142.149090374473	166.657007810287	111.062841633318	108.48911450888	133.872147502814	100.736808842309	101.246179098657	106.80149765903	193.622497318056	146.091303893223	176.355610400522	122.690745247161	110.441116690197	106.336449360392	131.282349832774	123.372581844567	133.17358674188	139.369017877633	173.298196337366	168.645088300868	46.010192899846	98.3232468804886	265.148834928837	69.7906722709362	280.969047232985	195.884310500543	150.053834598054	95.6219375785056	183.333726779847	160.677860140312	209.1370991436	132.774475031579	138.838790853394	98.6036995375514	84.8740493716614	151.57277073936	119.046932276658	116.84439157078	204.197403429533	179.361791614165	63.9851406484824	146.167599512861	76.0610794647988	440.645619143017	262.579993241448
YBR072W	82.5390513004466	111.110905633318	46.1021758576172	46.9245573294371	45.0373355641894	46.5438490280981	57.3702095854224	40.9057317000696	59.6073065523479	59.9320255137787	113.901951485989	117.306563002541	39.5850438961359	38.8260672509015	48.5616898204337	46.5914222457573	52.6185425068476	43.708847283106	63.7657127759188	54.2175471783298	102.763870084285	180.107653872634	40.725076139281	55.6263903819616	57.5127411248075	45.1755458640083	147.21197144314	62.3372995041372	93.3182395142045	135.985802330956	75.8699163698025	100.001568307292	38.372175372526	42.2119802063531	44.6594847129563	52.3617648011861	48.2917533403109	71.2680204578342	56.857372880045	61.6284892017177	100.506836266359	96.2604054909538	51.9775208729719	63.2486317797319	42.265414006337	97.4450663419071	67.4503912235008	142.990962503363	107.353146408106
YBR073W	40.5929760494	22.052546156231	59.8347388790351	75.9073721505599	89.3709627601884	95.3398197833623	97.8235624982203	113.824644730629	110.420092465825	131.977971078215	30.0574594199137	28.0135075826963	78.3095433597471	84.8908928028186	76.6763523480532	93.1828444915147	117.958051334032	91.9842905510142	129.031795264212	137.203588777814	23.0694402230028	12.8648324194739	44.1910400660283	45.0308874520642	32.5905533040576	34.5460056607122	30.1115396133695	37.9444431764313	35.5015041630126	32.3775719835609	25.2899721232675	19.7083382795393	78.4497807616088	73.5305461659053	98.0330152235626	87.8929623448481	90.547037513083	109.342716318869	112.890725863278	96.6068209108007	12.6853288491521	22.4002201456937	43.6239907326729	33.0403300341883	33.4601194216835	22.1466059867971	34.4427529651919	21.8863718117393	27.5636456993785
YBR074W	21.6495872263466	21.2043713040683	27.4651260428358	15.181474430112	21.1112510457138	17.2662665749396	16.9168566726246	17.7851007391607	18.5662102376165	17.2145179667237	18.9836585809981	15.7575980152667	18.0714330830186	19.7420680936787	19.1690880870133	13.9774266737272	18.5032237386717	20.8758673590954	11.2527728428092	14.3842472105773	19.9236074653206	18.2251792609213	12.1308737436156	13.2443786623718	20.1294593936826	19.9303878811801	15.0557698066847	12.8740075062892	15.2149303555768	18.6171038905475	15.1739832739605	17.5185229151461	16.2015851572888	14.297606198926	17.4280915953	21.5057248290586	18.1094075026166	13.6678395398586	10.7122586585592	8.32817421644833	12.6853288491521	23.6110428562717	16.7070602805981	20.7682074500612	14.0884713354457	16.6099544900978	15.786261775713	7.29545727057976	10.1550273629289
YBR076W	8.11859520987999	14.4189724867664	11.7707683040725	4.14040211730327	5.62966694552368	9.75919415105283	25.7430427626896	35.5702014783214	93.8082201479573	79.6968424385355	41.1312602588293	49.0236382697185	10.3265331902963	10.5291029832953	19.1690880870133	17.083521490111	32.3806415426754	33.9232844585301	100.524770729095	85.199002708804	9.4374982730466	16.0810405243423	8.6649098168683	8.82958577491455	32.5905533040576	19.9303878811801	811.338706249121	73.1785689831175	1134.01947583566	739.018080524777	18.5459795570628	17.5185229151461	13.6434401324537	5.44670712340039	4.357022898825	20.5706933147517	24.1458766701555	46.8611641366581	67.5696315386042	191.548006978312	17.5643014834414	13.9244611716474	15.7788902650093	5.66405657728943	36.9822372555449	421.892844048484	161.450404524337	1768.41884238853	1028.55920004523
YBR077C	129.89752335808	103.477331963853	87.2998649218709	95.2292486979752	69.6671284508555	73.5693097540906	83.113252348112	74.697423104475	73.2876719905916	82.8847161360769	121.811809228071	98.0472765394371	93.7993431451916	92.1296511038341	81.7881091712568	94.7358918997066	78.0604751475212	73.7179066118057	81.0199644682262	84.0925221541442	112.201368357332	121.143838616712	96.1804989672381	99.7743192565344	83.3934746309709	82.3789365755445	59.386647570812	72.5009896406813	119.690785463871	103.608230347395	107.903881059275	119.709906586831	108.294806051351	88.5089907552564	82.7834350776751	98.1783090022239	71.4315518158766	90.7935055147751	90.6421886493471	88.2786466943523	98.5552472126433	104.736164465	91.8888315432897	114.225140975337	87.4659262075585	85.2644330491687	90.4122265336288	131.318230870436	91.3952462663603
YBR078W	152.900209786073	128.074402676572	180.485113995778	169.756486809434	188.593842675043	179.419030930894	122.095574245899	129.238398704568	126.054795823818	100.736808842309	113.901951485989	148.821759033074	134.244931473852	193.472267318052	167.410035959916	164.623025268343	130.679017654369	153.307150918357	108.026619290968	121.159620735247	173.020801672521	196.188694396976	175.897669282426	188.953135583171	68.0567436643556	112.938864660021	89.4981871841814	65.0476168738823	67.9600222549098	62.3268260683547	124.763862474786	132.848798773191	181.62829676329	174.294627948813	167.745381604763	163.630515003707	122.741539739957	136.678395398586	97.2343478238451	128.253882933304	138.562822813815	194.942456403064	179.136813008635	193.521933057389	89.8140047634661	77.5131209537897	82.5190956457723	49.6091094399424	69.6344733457983
YBR079C	97.4231425185599	75.4875618424831	23.541536608145	31.7430828993251	29.5557514639993	29.2775824531585	26.478558270195	33.7916914044053	33.2237446357349	33.7914611939391	104.41012219549	73.5354574045778	20.6530663805926	40.1422051238134	40.8940545856284	35.720090388414	37.0064474773434	34.5756553135018	33.0081336722403	30.4282152531443	90.1805390535564	80.4052026217116	21.6622745421707	22.9569230147778	41.2174644727787	41.1894682877723	24.2565180218809	28.4583323823235	56.8024066608201	18.6171038905475	79.2419126529048	77.3734762085618	22.1705902152373	38.1269498638028	37.0346946400125	24.3108193719793	28.1701894485147	29.2882275854113	28.0166764916164	36.6439665523727	60.499260665187	108.368632596734	20.4197403429533	35.872358322833	34.0471390606604	25.4685968848166	43.0534412064899	20.4272803576233	20.3100547258578
YBR080C	18.9433888230533	31.3824695300211	25.5033313254904	31.7430828993251	24.6297928866661	24.0226317564377	25.0075272551841	24.3063043435196	19.5433791974911	25.5029895803314	26.8935163230807	33.2660402544519	24.9557885432161	15.135585538487	25.5587841160177	26.4018059392625	19.0814494805052	19.571125649152	27.0066548227421	26.0022930345051	37.7499930921864	35.3782891535531	16.4633286520498	18.5421301273205	35.466190360298	27.9025430336522	55.2044892911773	38.6220225188676	25.3582172592947	50.9946758741084	28.6619684063698	27.0077228275169	15.3488701490104	21.1059901031765	18.5173473200063	21.5057248290586	23.1397984755657	38.0746958610347	24.7205969043674	23.3188878060553	23.4190686445885	32.692213185607	25.988760436486	17.9361791614165	31.1120408657758	62.0104967630318	37.3129823789579	35.0181948987828	43.521545841124
YBR081C	24.35578562964	18.6598467475801	25.5033313254904	24.8424127038196	27.4446263594279	20.2690955444943	27.2140737777004	27.2704878000464	29.3150687962367	28.6908632778728	23.7295732262477	12.2559095674296	15.4897997854445	24.3485506488704	21.7249664986151	15.5304740819191	22.5508039315061	25.4424633438976	24.7561002541802	27.1087735891649	18.8749965460932	16.0810405243423	19.0628015971103	18.5421301273205	23.005096449923	17.2730028303561	26.7658129896617	25.7480150125784	5.07164345185894	23.4737396880816	10.115988849307	22.6280920987303	18.7597301821238	17.0209597606262	26.14213739295	14.0254727146034	19.1154856972064	28.3119533325643	24.7205969043674	26.6501574926347	27.3222467520199	21.7948087904046	13.9225502338318	23.6002357387059	22.3067462811223	22.1466059867971	24.3969500170109	27.7227376282031	14.5071819470413
YBR082C	152.900209786073	125.529878120084	74.5481992591257	78.6676402287621	78.111628869141	80.3256749355887	82.3777368406066	69.3618928827268	70.356165110968	70.1332213459113	118.647866131238	120.808251450378	74.0068211971236	94.103857913202	81.7881091712568	83.8645600423632	83.2645068240226	72.4131649018623	78.7694098996643	63.622631892938	130.027753984198	105.06279809237	75.3847154067542	60.9241418469104	81.476383260144	95.6658618296646	60.2230792267389	58.2718234495195	30.4298607111536	36.424768481506	141.623843890298	105.111137490876	75.8916357367737	94.6365362690819	67.5338549317875	86.9579308305412	100.607819458981	90.7935055147751	79.9299299907879	59.962854358428	92.7004800514962	152.563661532832	82.6071313874018	68.9126883570214	82.7697690957433	44.2932119735941	46.6412279736974	26.2636461740871	44.9722640358281
YBR083W	21.6495872263466	39.8642180516484	75.5290966177984	85.5683104242676	40.1113769868562	47.2945562704868	32.3626823302383	36.7558748609321	22.4748860771148	33.1538864544308	30.0574594199137	29.7643518066148	86.0544432524694	76.3359966288911	33.2264193508231	32.6139955720301	34.1153187681759	22.1806090690389	28.5070245351166	29.8749749758144	27.2638838999124	27.8738035755267	56.3219138096439	75.0514790867737	18.2123680228557	35.8746981861242	38.4758561726387	26.4255943550147	20.2865738074358	16.9982252913695	37.0919591141257	33.5771689206966	82.7133558030006	81.0197684605809	41.3917175388375	21.5057248290586	27.1641112539249	36.1221473553406	35.4328555629266	21.6532529627657	22.4432741177307	27.8489223432948	64.9719010912149	75.520754363859	18.197608808284	19.9319453881173	21.5267206032449	26.2636461740871	26.1129275046744
YBR084C-A	125.83822575314	72.0948624338322	111.822298888689	96.6093827370763	111.889630542283	103.597599449638	137.541399903513	121.531521717598	144.621006061434	141.541592170839	85.4264636144916	85.7913669720074	90.3571654150928	100.684547277762	86.8998659944603	132.009029696312	134.726597847203	129.169429284403	137.283828682272	149.928115156402	113.249979276559	78.2610638851326	57.1884047913308	78.5833133967395	74.7665634622498	93.0084767788406	84.4795972486199	79.9543624074803	156.206618317255	80.9439299589022	64.0679293789443	113.140460493652	91.2405058857841	111.657496029708	94.7652480494438	120.619065345589	106.64428862652	197.207399075103	162.331919672013	169.894754015546	89.7730964709226	124.109327834249	71.4690912003364	98.1769806730167	74.5514941500666	68.6544785590709	119.114520671289	77.3318470681454	123.311046549851
YBR084W	44.65227365434	16.9634970432546	28.4460234015085	27.6026807820218	29.5557514639993	24.7733389988264	24.2720117476787	29.6418345652678	28.3378998363621	27.4157137988562	22.1476016778312	22.7609749109407	23.2346996781667	18.4259302207668	29.3926017334204	35.720090388414	40.4758019283443	35.8803970234453	39.0096125217385	30.9814555304742	35.6527712537316	23.5855261023687	22.5287655238576	24.7228401697607	26.8392791915768	18.6016953557681	15.8922014626117	21.6825389579608	32.4585180918972	17.8076645909585	21.9179758401652	19.7083382795393	17.0543001655671	23.1485052744517	28.3206488423625	28.9859769435137	31.1884240322842	41.0035186195758	30.4887361820531	23.3188878060553	16.5885069565835	39.9571494490752	25.0605904208972	24.5442451682542	28.1769426708913	17.7172847894376	27.2671794307769	18.9681889035074	21.760772920562
YBR085C-A	434.34484372858	462.255294428689	549.302520856716	458.204500981562	553.818485765892	538.257092792683	659.021894724853	601.136404983632	849.159826130988	872.202243647333	461.935692137621	521.751578727719	586.030758549316	520.532528736663	563.571189758191	545.119640275361	733.768466386699	711.73660277416	822.952787237445	880.205281231865	552.61795443284	541.395030986191	621.274033869457	511.233016367552	826.266380826401	462.384998843379	736.059857215698	542.063473949019	425.003721265779	481.616383255468	480.509470342082	536.504764276348	496.280134818003	588.244369327243	505.4146562637	619.925893985471	633.829262591581	901.101135377822	851.21255340705	1114.30971016079	528.880633556957	457.690984598497	532.769588947962	424.804243296707	578.214344392249	509.371937696332	510.183278296905	358.936497712524	349.623084923696
YBR086C	54.1239680658666	53.4350156862521	86.3189675631982	97.9895167761774	76.7042121327601	85.5806256323094	88.2618609006499	93.6681972262464	75.2420099103407	84.7974403546018	58.5329472914109	59.5287036132296	82.6122655223706	79.6263413111709	72.8425347306506	86.970654858747	95.9854731443593	83.5034694363817	66.7664522006679	73.0277166075463	44.0416586075508	40.7386359950005	32.0601663224127	43.2649702970813	26.8392791915768	15.9443103049441	16.7286331185386	23.0376976428333	21.3009024978076	15.3793466921914	65.7539275204955	48.1759380166517	102.325800993403	87.1473139744063	88.2297137012063	74.8025211445516	76.4619427888257	83.9595857448458	79.9299299907879	73.2879331047453	56.5960825577556	42.9842062255203	22.2760803741308	31.1523111750918	24.067805198053	18.8246150887775	17.9389338360375	10.2136401788117	11.6057455576331
YBR087W	12.17789281482	9.32992337379005	31.3887154775266	33.1232169384262	34.4817100413325	41.2888983313774	27.2140737777004	24.3063043435196	25.4063929567384	18.4896674457402	7.90985774208256	10.5050653435111	37.0034105985618	43.4325498060932	30.6705409392213	37.2731377966059	20.8161267060056	28.0519467637845	17.2542516923074	20.4698902612062	9.4374982730466	11.7927630511844	49.3899859561493	46.7968046070471	19.1709137082692	34.5460056607122	10.0371798711232	21.0049596155245	5.07164345185894	8.90383229547924	6.74399256620467	7.29938454797753	39.2248903808044	36.0844346925276	38.1239503647188	39.2713236008896	27.1641112539249	27.3356790797172	15.6563780394327	21.6532529627657	5.85476716114713	8.47575897404625	54.7620309197383	57.5845752024425	33.4601194216835	8.85864239471882	24.3969500170109	8.75454872469571	11.6057455576331
YBR088C	20.2964880247	13.5707976346037	122.612169834088	136.633269871008	125.963797906092	142.634376053849	66.9319111829928	73.5117497218643	61.561644472097	51.0059791606627	12.6557723873321	26.2626633587778	141.12928693405	146.091303893223	126.515981374288	113.37246079801	80.9516038566886	65.2370854971732	60.7649733511696	53.11106662367	33.5555494152768	10.7206936828949	216.622745421707	193.367928470629	99.6887512829997	158.114410524029	35.130129548931	71.1458309558087	27.3868746400383	39.6625256798621	15.1739832739605	16.0586460055506	152.635986481826	136.16767808501	150.317290009463	100.983403545145	104.63213223734	50.7662611480463	51.0892336023593	53.3003149852693	12.6853288491521	24.2164542115607	283.091854754579	197.297970775582	98.0322797091427	53.1518543683129	47.3587853271389	33.5591034446669	33.366518478195
YBR089W	5.41239680658666	4.24087426081366	5.88538415203624	2.76026807820218	4.22225020914276	8.25777966627547	2.94206203002166	5.92836691305357	1.95433791974911	4.46302317655799	6.32788619366604	3.50168844783704	2.58163329757408	5.92262042810362	5.11175682320355	1.55304740819191	5.20403167650141	3.91422512983039	11.2527728428092	8.29860415994844	5.243054596137	7.50448557802641	7.79841883518147	3.53183430996582	15.3367309666153	13.2869252541201	8.36431655926929	12.1964281638529	4.05731476148715	7.2849536963012	3.37199628310233	5.83950763838202	7.67443507450521	6.12754551382544	9.80330152235626	2.80509454292068	4.02431277835925	4.88137126423522	12.3602984521837	8.32817421644833	5.85476716114713	3.02705677644509	6.49719010912149	6.60806600683766	10.5663535015842	9.96597269405867	5.74045882753199	4.37727436234786	7.25359097352066
YBR091C	21.6495872263466	12.722622782441	22.5606392494723	30.362948860224	30.9631682003802	32.2804114227132	37.5112908827762	33.7916914044053	31.2694067159858	37.6169096309888	18.9836585809981	15.7575980152667	13.7687109203951	20.4001370301347	29.3926017334204	29.5079007556463	38.1628989610103	37.1851387333887	46.5114610836113	37.067098581103	17.8263856268658	13.9369017877633	24.2617474872312	23.8398815922693	38.3418274165384	46.5042383894203	54.3680576352504	48.1081333129754	31.4441894015254	59.8985081695876	15.1739832739605	9.48919991237079	12.7907251241753	28.5952123978521	29.4099045670688	33.6611345150482	37.224893199823	49.7899868951992	53.561293292796	39.975236238952	15.6127124297257	26.6380996327168	38.9831406547289	22.6562263091577	51.6577282299674	44.2932119735941	36.5954250255164	84.6273043387252	43.521545841124
YBR092C	33.8274800411666	14.4189724867664	11.7707683040725	9.66093827370763	7.74079205009506	9.75919415105283	13.2392791350975	9.48538706088571	3.90867583949822	7.65089687409941	25.3115447746642	12.2559095674296	6.88435546019755	15.793654474943	10.2235136464071	9.31828444915147	9.82983761116933	14.3521588093781	4.50110913712368	6.63888332795875	36.701382172959	12.8648324194739	17.3298196337366	16.7762129723376	6.70981979789421	7.97215515247205	9.20074821519622	5.42063473949019	13.1862729748332	7.2849536963012	21.9179758401652	10.9490768219663	9.37986509106192	9.53173746595069	4.357022898825	8.41528362876205	8.04862555671849	11.7152910341645	9.06421886493471	4.996904529869	14.6369179028678	29.0597450538728	13.9225502338318	12.2721225841271	11.1533731405612	17.7172847894376	8.61068824129798	8.75454872469571	4.3521545841124
YBR093C	9.47169441152666	10.1780982259528	21.5797418907996	30.362948860224	19.7038343093329	18.0169738173283	19.1234031951408	22.5277942696036	19.5433791974911	17.852092706232	20.5656301294146	12.2559095674296	16.3503442179692	25.0066195853264	14.0573312638098	20.1896163064948	16.7685465131712	20.2234965041237	21.0051759732438	19.3634097065464	12.5833310307288	7.50448557802641	18.1963106154234	23.8398815922693	18.2123680228557	18.6016953557681	20.0743597422463	10.8412694789804	28.4012033304101	16.9982252913695	23.6039739817163	16.0586460055506	27.2868802649074	17.7017981510513	11.9818129717688	22.4407563433655	10.0607819458981	22.454307815482	15.6563780394327	13.3250787463173	6.83056168800498	12.7136384610694	30.6296105144299	20.7682074500612	20.5456873641916	19.9319453881173	16.5038191291545	26.2636461740871	13.0564637523372
YBR094W	18.9433888230533	27.1415952692074	36.2932022708902	34.5033509775272	42.9262104596181	44.2917273009321	36.0402598677654	44.4627518479018	49.8356169536023	58.0193012952539	36.3853456135798	17.5084422391852	47.3299437888581	38.1679983144455	40.8940545856284	26.4018059392625	46.2580593466792	41.0993638632191	47.2616459397986	50.3448652370205	27.2638838999124	19.2972486292108	41.5915671209678	36.2013016771496	49.8443756414999	38.5320832369482	79.4610073130583	40.6547605461764	148.091988794281	61.5173867687657	21.9179758401652	21.8981536439326	40.9303203973611	35.4035963021026	46.8379961623688	51.4267332868792	54.3282225078498	43.932341378117	47.7931540151103	59.962854358428	28.2980412788778	22.4002201456937	48.2648408106168	38.7043866114777	50.4836889520136	52.0445240689731	50.9465720943464	105.054584696349	88.493809876952
YBR095C	20.2964880247	27.9897701213701	19.6179471734541	22.0821446256174	21.8149594139043	23.2719245140491	25.7430427626896	25.4919777261304	17.589041277742	26.1405643198397	23.7295732262477	15.7575980152667	31.8401440034137	21.7162749030466	15.3352704696106	15.5304740819191	27.176609866174	22.8329799240106	18.0044365484947	18.8101694292165	20.972218384548	24.6575954706582	18.1963106154234	17.6591715498291	27.7978248769903	17.2730028303561	15.8922014626117	21.6825389579608	29.4155320207819	21.8548610889036	33.7199628310233	22.6280920987303	22.1705902152373	15.6592829797761	19.6066030447125	26.1808824005931	17.1033293080268	19.5254850569409	16.4803979362449	18.3219832761863	27.3222467520199	29.6651564091619	19.4915703273645	11.3281131545789	28.7639623098682	14.3952938914181	16.5038191291545	24.8045547199712	21.760772920562
YBR096W	31.1212816378733	29.6861198256956	42.1785864229264	48.3046913685381	51.3707108779036	57.8044576639283	67.6674266904983	71.1404029566428	75.2420099103407	77.1465434805024	20.5656301294146	29.7643518066148	56.7959325466298	59.2262042810362	42.1719937914293	40.3792326129897	75.1693464383537	68.4989397720319	62.2653430635442	66.3888332795875	28.3124948191398	18.2251792609213	46.7905130110888	41.4990531420984	55.5956497539806	41.1894682877723	40.9851511404195	54.8839267373382	15.2149303555768	42.0908435786291	28.6619684063698	40.8765534686742	55.4264755380932	66.7221622616548	47.927251887075	61.7120799442551	68.4133172321072	98.6036995375514	74.9858106099144	73.2879331047453	18.5400960102992	17.5569293033815	55.6902009353271	46.2564620478636	52.8317675079212	53.1518543683129	34.4427529651919	27.7227376282031	27.5636456993785
YBR097W	4.05929760494	4.24087426081366	15.6943577387633	4.14040211730327	6.33337531371414	14.2634376053849	11.0327326125812	11.2638971348018	7.81735167899644	3.18787369754142	3.16394309683302	0	12.0476220553457	13.1613787291192	7.66763523480532	4.65914222457573	9.25161186933584	7.17607940468905	12.0029576989965	7.74536388261854	5.243054596137	1.07206936828949	4.33245490843415	6.18071004244018	10.544002539548	6.64346262706004	2.50929496778079	5.42063473949019	8.11462952297431	4.85663579753413	5.0579944246535	3.64969227398876	9.37986509106192	12.2550910276509	7.62479007294375	10.2853466573758	5.03039097294906	7.81019402277635	8.24019896812246	8.32817421644833	5.85476716114713	3.02705677644509	4.64085007794392	7.5520754363859	4.69615711181522	1.10733029933985	4.30534412064899	4.37727436234786	7.25359097352066
YBR098W	1.35309920164667	10.1780982259528	22.5606392494723	16.5616084692131	19.7038343093329	25.5240462412151	22.0654652251625	14.8209172826339	15.6347033579929	17.852092706232	11.0738008389156	8.75422111959259	14.6292553529198	21.0582059665906	20.4470272928142	23.2957111228787	18.5032237386717	16.3092713742933	21.0051759732438	16.5972083198969	9.4374982730466	5.36034684144744	25.1282384689181	26.4887573247436	14.3781852812019	15.9443103049441	12.5464748389039	18.2946422457794	23.3295598785511	9.71327159506826	11.8019869908582	9.48919991237079	20.4651601986806	17.7017981510513	22.8743702188313	15.8955357432172	19.1154856972064	18.5492108040938	21.4245173171184	16.6563484328967	11.7095343222943	12.1082271057804	23.2042503897196	21.7122168796095	16.4365498913533	12.1806332927384	8.61068824129798	20.4272803576233	13.0564637523372
YBR099C	4.05929760494	5.08904911297639	1.96179471734541	9.66093827370763	2.81483347276184	5.25495069672075	1.47103101501083	2.96418345652679	4.88584479937278	3.8254484370497	7.90985774208256	1.75084422391852	6.88435546019755	5.92262042810362	3.83381761740266	1.55304740819191	2.31290296733396	2.60948341988693	3.00073942474912	4.97916249596906	1.0486109192274	6.43241620973693	7.79841883518147	4.41479288745727	1.91709137082692	6.64346262706004	7.52788490334236	4.74305539705392	1.01432869037179	2.42831789876707	5.0579944246535	5.10956918358427	18.7597301821238	9.53173746595069	4.357022898825	5.61018908584137	2.01215638917962	2.92882275854113	3.29607958724899	1.66563484328967	2.92738358057356	4.84329084231214	11.1380401870654	4.72004714774119	5.28317675079212	7.75131209537897	5.74045882753199	7.29545727057976	2.90143638940826
YBR101C	51.4177696625733	68.7021630251812	53.9493547269989	56.5854956031447	38.0002518822848	47.2945562704868	38.2468063902816	50.9839554522607	53.7442927931005	40.8047833285302	69.6067481303265	75.2863016284963	51.6326659514816	53.3035838529326	47.2837506146328	43.4853274293735	50.3056395395136	40.4469930082474	54.0133096454841	51.4513457916803	55.5763787190522	63.2520927290798	54.5889318462703	48.56272176203	38.3418274165384	39.8607757623602	31.7844029252233	37.266863833995	33.472846782269	45.3286007769852	82.6139089360072	75.1836608441686	54.5737605298148	47.6586873297535	45.7487404376625	57.9719538870275	41.2492059781823	68.3391976992931	51.0892336023593	34.978331709083	61.4750551920448	64.7790150159249	38.0549706391402	44.3684431887672	39.9173354504294	24.3612665854768	34.4427529651919	29.181829082319	29.0143638940826
YBR102C	23.0026864279933	28.8379449735329	26.4842286841631	20.7020105865163	29.5557514639993	24.0226317564377	38.2468063902816	29.6418345652678	30.2922377561112	40.8047833285302	26.8935163230807	19.2592864631037	32.7006884359384	29.6131021405181	30.6705409392213	26.4018059392625	32.9588672845089	33.9232844585301	34.5085033846149	38.7268194130927	26.215272980685	19.2972486292108	28.5942023956654	24.7228401697607	31.6320076186441	25.2451579828282	25.9293813337348	35.2341258066862	15.2149303555768	33.1870112831499	21.9179758401652	22.6280920987303	24.7287352400723	23.8293436648767	33.7669274658938	32.7261030007413	36.2188150052332	31.2407760911054	40.3769749438001	38.3096013956623	41.9591646548878	35.719269962052	19.4915703273645	23.6002357387059	23.4807855590761	32.1125786808557	37.3129823789579	24.8045547199712	43.521545841124
YBR103W	28.41508323458	28.8379449735329	38.2549969882356	48.3046913685381	46.4447523005704	51.0480924824302	52.2216010328845	55.7266489827036	47.8812790338532	51.0059791606627	33.2214025167467	43.771105597963	46.4693993563334	46.722894488373	52.3955074378364	68.3340859604441	65.9177345690179	51.5372975427668	53.2631247892968	50.3448652370205	26.215272980685	38.5944972584216	41.5915671209678	40.6160945646069	46.010192899846	37.2033907115362	20.9107913981732	40.6547605461764	26.3725459496665	34.8058898823279	38.7779572556768	36.4969227398876	34.1086003311343	44.9353337680533	42.4809732635438	60.7770484299482	79.4801773725951	60.5290036765167	46.969134118298	61.6284892017177	35.1286029668828	35.113858606763	20.4197403429533	32.0963206046401	39.3303158114525	32.1125786808557	31.5725235514259	37.9363778070148	23.2114911152661
YBR104W	29.7681824362266	27.1415952692074	13.7325630214179	9.66093827370763	25.3335012548566	19.5183883021057	22.8009807326679	21.9349575782982	24.4292239968639	25.5029895803314	14.2377439357486	28.0135075826963	9.46598875777163	17.7678612843109	19.1690880870133	12.4243792655353	17.9249979968382	15.0045296643498	23.2557305418057	21.5763708158659	22.0208293037754	22.5134567340792	13.8638557069893	10.5955029298975	1.91709137082692	23.9164654574162	8.36431655926929	18.9722215882157	23.3295598785511	17.8076645909585	32.0339646894722	21.1682151891348	10.2325800993403	13.616767808501	15.2495801458875	14.9605042289103	10.0607819458981	15.6203880455527	14.8323581426204	19.987618119476	26.3464522251621	30.8759791197399	6.49719010912149	16.9921697318683	11.7403927795381	17.7172847894376	17.9389338360375	17.5090974493914	21.760772920562
YBR105C	82.5390513004466	29.6861198256956	60.8156362377078	52.4450934858414	30.2594598321898	28.5268752107698	33.8337133452491	23.1206309609089	25.4063929567384	22.3151158827899	47.4591464524953	43.771105597963	48.1904882213828	40.1422051238134	24.2808449102169	27.9548533474544	24.8637068988401	23.4853507789824	24.7561002541802	23.7893319251855	69.2083206690084	48.2431215730269	52.8559498828966	31.7865087896924	19.1709137082692	39.8607757623602	32.6208345811502	23.7152769852696	20.2865738074358	33.1870112831499	30.347966547921	36.4969227398876	51.1629004967014	47.6586873297535	31.5884160164813	33.6611345150482	25.1519548647453	19.5254850569409	31.3127560788654	43.3065059255313	25.3706576983042	124.109327834249	38.0549706391402	39.648396041026	22.8937659200992	32.1125786808557	41.6183264996069	32.1000119905509	37.7186730623074
YBR106W	75.7735552922133	32.2306443821838	72.5864045417803	55.2053615640436	68.9634200826651	78.8242604508113	73.5515507505416	63.4335259696732	65.4703203115952	61.2071749927953	63.2788619366604	57.7778593893111	64.540832439352	71.7295140736994	61.3410818784426	71.4401807768279	68.8088632781853	65.8894563521449	58.5144187826078	68.6017943889071	75.4999861843728	53.6034684144744	109.177863692541	75.0514790867737	119.818210676682	98.3232468804886	72.7695540656428	81.3095210923528	49.7021058282176	54.2324330724645	40.463955397228	59.125014838618	68.2172006622685	85.7856371935562	70.8016221059063	67.3222690300964	71.4315518158766	71.2680204578342	69.2176713322287	61.6284892017177	47.8139318160349	85.3630010957515	102.098701714766	73.6327355047625	102.728436820958	70.8691391577506	72.4732926975913	53.9863838022902	58.0287277881653
YBR107C	13.5309920164667	13.5707976346037	22.5606392494723	20.7020105865163	18.296417572952	27.0254607259925	27.2140737777004	20.1564475043821	21.4977171172402	21.0399664037734	18.9836585809981	14.0067537913482	18.9319775155433	19.7420680936787	16.6132096754115	17.083521490111	22.5508039315061	20.2234965041237	27.7568396789293	14.9374874879072	16.7777747076384	19.2972486292108	31.1936753407259	24.7228401697607	26.8392791915768	11.9582327287081	12.5464748389039	12.1964281638529	18.2579164266922	15.3793466921914	18.5459795570628	15.3287075507528	18.7597301821238	17.0209597606262	22.8743702188313	20.5706933147517	23.1397984755657	22.454307815482	27.1926565948041	29.981427179214	15.6127124297257	14.5298725269364	14.8507202494205	24.5442451682542	19.9586677252147	18.8246150887775	17.9389338360375	16.0500059952755	11.6057455576331
YBR108W	47.3584720576333	60.2204145035539	93.1852490739072	82.8080423460654	93.5932129693312	96.090527025751	115.47593467835	137.538112382843	128.009133743567	121.139200506574	52.2050610977449	66.5320805089037	92.9387987126669	110.555581324601	109.902771698876	88.523702266939	116.223374108532	111.555416200166	117.028837565216	123.925822121897	54.5277677998248	65.3962314656587	73.6517334433805	69.7537276218249	69.9738350351825	81.0502440501325	62.7323741945197	71.823410298245	53.7594205897048	74.46841556219	57.3239368127397	57.6651379290225	114.2638111093	108.253304077583	118.728873992981	107.528624145293	112.680757794059	88.840957009081	142.555442148519	124.922613246725	60.499260665187	60.5411355289018	91.8888315432897	112.33712211624	84.530828012674	68.6544785590709	71.0381779907083	75.8727556140295	65.2823187616859
YBR109C	227.32066587664	226.462685527449	296.231002319157	245.663858959994	270.224013385137	275.509557956645	287.586563434618	260.848144174357	255.041098527259	263.95594215643	223.057988326728	224.10806066157	234.928630079241	269.150195010487	272.201050835589	257.805869759857	281.017710531076	265.514937973495	261.814514809361	252.277566462433	235.937456826165	231.566983550529	253.015366652554	239.281774500184	275.102611713663	301.613203268526	226.672978756198	264.255943550147	165.335576530601	201.550385597666	256.271717515777	225.550982532506	208.915177028197	266.207810656194	266.867652553031	274.899265206227	271.641112539249	298.739921371195	253.798128218172	304.811176322009	249.803398875611	218.553499259335	265.456624458392	258.658583696217	243.613150175415	225.89538106533	234.64125457537	192.600071943306	174.086183364496
YBR110W	14.8840912181133	12.722622782441	14.7134603800906	8.28080423460654	10.5556255228569	9.75919415105283	16.1813411651192	11.8567338261071	11.7260275184947	7.65089687409941	9.49182929049907	12.2559095674296	12.0476220553457	17.1097923478549	7.66763523480532	17.083521490111	14.4556435458373	9.78556282457598	6.75166370568551	11.6180458239278	13.6319419499562	9.64862431460539	8.6649098168683	8.82958577491455	9.58545685413459	21.2590804065921	11.710043182977	8.80853145167156	11.1576155940897	8.09439299589022	15.1739832739605	18.9783998247416	13.6434401324537	12.9359294180759	11.9818129717688	11.2203781716827	8.04862555671849	7.81019402277635	13.1843183489959	11.6594439030277	12.6853288491521	7.87034761875723	17.6352302961869	15.1041508727718	11.7403927795381	6.64398179603912	11.480917655064	1.45909145411595	5.80287277881653
YBR111C	64.9487616790399	83.9693103641104	156.943577387633	183.557827200445	150.593590792758	112.606086358302	141.954492948545	115.603154804545	104.557078706577	91.8107624891929	49.0411180009118	84.0405227480889	154.03745342192	161.884958368166	122.682163756885	163.069977860151	108.128213722863	113.512528765081	117.028837565216	105.66889297001	69.2083206690084	96.4862431460539	151.635921795195	122.731242271312	146.657489868259	111.610172134609	76.1152806893506	119.93154361122	73.0316657067688	67.9929011654778	84.2999070775583	110.220706674461	178.217436730177	166.805405654137	108.925572470625	150.54007380341	103.626054042751	150.346234938445	117.010825347339	131.585152619884	87.8215074172069	78.7034761875723	130.871972198019	134.04933899585	122.687104546173	105.196378437286	106.198488309342	67.1182068893338	53.6765732040529
YBR111W-A	17.5902896214067	25.4452455648819	22.5606392494723	17.9417425083142	16.889000836571	9.00848690866415	22.8009807326679	15.4137539739393	10.7488585586201	18.4896674457402	14.2377439357486	14.0067537913482	14.6292553529198	8.55489617392745	15.3352704696106	9.31828444915147	16.7685465131712	10.4379336795477	13.503327411371	10.511565269268	17.8263856268658	16.0810405243423	18.1963106154234	20.3080472823035	17.2538223374423	18.6016953557681	18.4014964303924	8.13095210923528	10.1432869037179	12.9510287934243	28.6619684063698	10.2191383671685	20.4651601986806	28.5952123978521	18.5173473200063	22.4407563433655	10.0607819458981	9.76274252847044	13.1843183489959	8.32817421644833	20.4916850640149	18.7677520139595	15.7788902650093	20.7682074500612	15.8495302523764	6.64398179603912	10.7633603016225	1.45909145411595	5.80287277881653
YBR112C	39.2398768477533	30.5342946778583	39.2358943469083	44.1642892512349	42.2225020914276	51.7987997248189	41.1888684203033	43.8699151565964	44.9497721542295	59.9320255137787	39.5492887104128	36.7677287022889	44.7483104912841	53.3035838529326	53.6734466436373	54.3566592867169	42.7887048956783	52.1896683977386	60.7649733511696	54.2175471783298	36.701382172959	26.8017342072372	58.0548957730176	52.0945560719958	53.6785583831537	63.7772412197764	207.435050669878	103.66963939275	138.963030580935	182.933281707119	33.7199628310233	37.9567996494832	45.1938954387529	41.531141815928	46.8379961623688	41.1413866295034	44.2674405619517	35.1458731024936	55.2093330864205	44.972140768821	33.1770139131671	35.113858606763	60.331051013271	57.5845752024425	69.2683173992745	168.314205499658	76.0610794647988	220.322809571509	155.226846833342
YBR114W	55.4770672675133	29.6861198256956	28.4460234015085	48.3046913685381	36.5928351459039	24.7733389988264	36.0402598677654	25.4919777261304	27.3607308764875	35.0666106729556	36.3853456135798	38.5185729262074	31.8401440034137	43.4325498060932	35.7822977624248	34.1670429802221	38.7411247028438	28.7043176187562	36.7590579531767	33.7476569171237	37.7499930921864	31.0900116803951	24.2617474872312	26.4887573247436	35.466190360298	38.5320832369482	97.8625037434507	50.8184506827205	54.7737492800766	112.512062642874	38.7779572556768	36.4969227398876	43.4884654221962	40.850303425503	37.0346946400125	25.2458508862862	26.1580330593351	30.2645018382584	33.7848157693021	36.6439665523727	25.3706576983042	53.2761992654336	23.2042503897196	32.0963206046401	43.4394532842908	99.6597269405868	56.6870309218784	96.3000359716528	110.254582797514
YBR115C	33.8274800411666	30.5342946778583	55.9111494443443	51.0649594467403	50.6670025097131	45.0424345433208	60.3122716154441	56.9123223653143	41.0410963147313	47.8181054631213	25.3115447746642	38.5185729262074	52.4932103840063	40.1422051238134	57.5072642610399	63.6749437358684	49.1491880558467	50.8849266877951	48.0118307959859	56.4305082876494	29.3611057383672	27.8738035755267	50.2564769378361	50.3286389170129	31.6320076186441	39.8607757623602	92.0074821519622	42.009919231049	110.561827250525	65.5645832667108	26.9759702648187	33.5771689206966	35.814030347691	55.828748014854	46.8379961623688	46.7515757153447	46.2795969511313	57.6001809179756	46.1451142214858	56.6315846718487	35.1286029668828	33.297624540896	41.7676507014953	51.9205186251531	35.8081979775911	70.8691391577506	58.1221456287614	141.531871049247	150.87469224923
YBR116C	27.0619840329333	32.2306443821838	111.822298888689	102.129918893481	36.5928351459039	34.5325331498792	39.7178374052925	35.5702014783214	36.1552515153585	31.2411622359059	18.9836585809981	24.5118191348593	116.173498390834	107.923305578777	34.5043585566239	23.2957111228787	47.4145108303462	31.9661718936149	27.0066548227421	35.9606180264432	24.1180511422302	15.0089711560528	92.7145350404908	103.3061535665	30.6734619332307	29.2312355590642	26.7658129896617	23.0376976428333	190.693793789896	13.7604680930134	26.9759702648187	47.4459995618539	100.620370976846	124.593425447784	39.213206089425	39.2713236008896	32.194502226874	36.1221473553406	33.7848157693021	24.984522649345	37.0801920205985	15.1352838822254	64.9719010912149	53.8085374842495	26.4158837539606	15.5026241907579	19.3740485429205	39.3954692611307	23.2114911152661
YBR118W	1608.83495075789	1203.56011521892	1434.0719383795	1262.8226457775	1088.63684559064	957.151734045566	1037.81238109014	972.252173740785	1176.51142768896	1039.2468253985	1311.45441363729	1176.56731847324	1324.3778816555	1327.98311376812	990.402884495687	1149.25508206201	1013.62972543411	985.079991007315	1024.00232869564	1094.30926855853	1313.90948179193	1392.61810940804	1119.50634833938	1282.93881309508	975.799507750901	1145.33295690515	1140.0563470284	964.872983629254	1507.29243389248	945.425101919977	1431.41242217694	1259.87377298092	1258.60735221885	1140.40430396196	1118.66562927332	870.514339819719	890.379202211983	1153.95616686521	1030.02487101531	1142.62550249671	1192.4209118203	1485.07405452396	1111.01950865977	1559.50357761369	988.541072037104	924.620799948777	1316.00018621171	1018.44583497293	1211.34969257795
YBR119W	14.8840912181133	12.722622782441	27.4651260428358	22.0821446256174	42.2225020914276	27.7761679683811	50.7505700178737	40.3128950087643	47.8812790338532	40.1672085890219	14.2377439357486	12.2559095674296	35.2823217335124	27.6388953311502	42.1719937914293	37.2731377966059	38.7411247028438	28.7043176187562	51.7627550769223	31.5346958078041	16.7777747076384	16.0810405243423	34.6596392674732	24.7228401697607	34.5076446748845	15.9443103049441	49.3494676996888	36.5892844915588	29.4155320207819	26.7114968864377	21.9179758401652	16.0586460055506	33.2558853228559	31.3185659595523	44.6594847129563	45.8165442010378	29.1762676431045	53.6950839065874	48.6171739119225	58.2972195151383	12.6853288491521	14.5298725269364	25.988760436486	28.3202828864471	28.7639623098682	43.1858816742543	33.7251956117504	18.9681889035074	30.4650820887868
YBR120C	25.7088848312866	26.2934204170447	26.4842286841631	26.2225467429207	19.0001259411424	25.5240462412151	22.0654652251625	20.7492841956875	16.6118723178674	13.389069529674	20.5656301294146	22.7609749109407	19.792521948068	26.9808263946943	28.1146625276195	26.4018059392625	20.8161267060056	18.9187547941802	15.7538819799329	21.5763708158659	24.1180511422302	18.2251792609213	25.1282384689181	28.2546744797265	15.3367309666153	22.5877729320041	16.7286331185386	14.906745533598	32.4585180918972	21.8548610889036	16.8599814155117	23.3580305535281	21.3178752069589	24.5101820553018	35.9454389153063	28.0509454292068	21.127642086386	19.5254850569409	18.1284377298694	14.990713589607	24.3948631714464	31.4813904750289	22.2760803741308	24.5442451682542	15.2625106133995	11.0733029933985	12.1984750085055	23.3454632658552	23.2114911152661
YBR121C	55.4770672675133	48.3459665732757	22.5606392494723	27.6026807820218	28.8520430958089	29.2775824531585	38.2468063902816	37.3487115522375	28.3378998363621	33.1538864544308	50.6230895493284	43.771105597963	13.7687109203951	17.1097923478549	30.6705409392213	32.6139955720301	28.333061349841	20.8758673590954	27.7568396789293	30.9814555304742	56.6249896382796	58.9638152559218	26.8612204322917	19.425088704812	31.6320076186441	23.9164654574162	24.2565180218809	28.4583323823235	59.8453927319355	19.4265431901365	35.4059609725745	50.365753381045	19.6124451904022	19.0634749319014	31.5884160164813	26.1808824005931	30.1823458376943	36.1221473553406	34.6088356661143	28.3157923359243	44.8865482354613	59.3303128183237	18.5634003117757	28.3202828864471	32.8730997827065	12.1806332927384	25.8320647238939	20.4272803576233	21.760772920562
YBR122C	78.4797536955066	73.7912121381576	45.1212784989445	55.2053615640436	48.5558774051417	42.039605573766	35.30474436026	40.3128950087643	38.1095894351076	37.6169096309888	66.4428050334935	87.5422111959259	48.1904882213828	52.6455149164766	43.4499329972302	54.3566592867169	42.2104791538448	39.1422512983039	36.7590579531767	42.599501354402	73.402764345918	82.5493413582905	62.3873506814517	57.3923075369446	55.5956497539806	45.1755458640083	117.10043182977	63.0148788465734	138.963030580935	121.415894938353	74.1839182282513	68.6142147509888	55.4264755380932	46.2970105489034	49.0165076117813	51.4267332868792	57.3464570916192	49.7899868951992	43.6730545310491	59.962854358428	93.676274578354	90.2062919380636	61.2592210288598	48.1444809069601	56.9409049807596	105.196378437286	65.2977191631763	189.681889035074	140.719664886301
YBR123C	16.23719041976	10.1780982259528	12.7516656627452	6.90067019550545	11.9630422592378	12.0113158782189	16.1813411651192	22.5277942696036	18.5662102376165	22.9526906222982	15.8197154841651	7.00337689567408	10.3265331902963	10.5291029832953	16.6132096754115	7.76523704095956	22.5508039315061	20.2234965041237	21.0051759732438	20.4698902612062	15.729163788411	9.64862431460539	12.1308737436156	8.82958577491455	15.3367309666153	13.2869252541201	24.2565180218809	18.2946422457794	10.1432869037179	18.6171038905475	5.0579944246535	10.2191383671685	7.67443507450521	12.9359294180759	11.9818129717688	17.765598771831	23.1397984755657	21.478033562635	23.0725571107429	26.6501574926347	13.66112337601	15.1352838822254	10.2098701714766	13.2161320136753	11.1533731405612	22.1466059867971	23.6793926635694	20.4272803576233	15.9579001417455
YBR124W	1.35309920164667	2.54452455648819	4.90448679336354	9.66093827370763	1.40741673638092	1.50141448477736	4.41309304503249	4.1498568391375	1.95433791974911	6.37574739508284	1.58197154841651	3.50168844783704	3.44217773009877	5.26455149164766	3.83381761740266	6.21218963276765	2.31290296733396	3.91422512983039	3.7509242809364	2.21296110931958	2.0972218384548	1.07206936828949	2.59947294506049	1.76591715498291	1.91709137082692	3.98607757623602	0.836431655926929	0	3.04298607111536	4.85663579753413	1.68599814155117	0	2.55814502483507	2.7233535617002	6.5355343482375	0	2.01215638917962	2.92882275854113	2.47205969043674	4.996904529869	3.90317810743142	1.21082271057804	2.78451004676635	1.88801885909648	3.52211783386142	8.85864239471882	2.15267206032449	5.83636581646381	4.3521545841124
YBR125C	23.0026864279933	22.9007210083938	26.4842286841631	31.7430828993251	31.6668765685707	33.0311186651019	35.30474436026	32.0131813304893	36.1552515153585	36.9793348914805	30.0574594199137	21.0101306870222	23.2346996781667	32.2453778863419	38.3381761740266	27.9548533474544	32.9588672845089	29.3566884737279	45.761276227424	41.4930207997422	19.9236074653206	17.1531098926318	25.1282384689181	30.9035502122009	32.5905533040576	31.8886206098882	34.2936978930041	37.266863833995	25.3582172592947	24.2831789876707	16.8599814155117	16.7885844603483	38.372175372526	23.8293436648767	35.9454389153063	35.531197543662	28.1701894485147	36.1221473553406	37.0808953565511	29.981427179214	20.4916850640149	25.4272769221387	32.4859505456075	31.1523111750918	35.8081979775911	29.897918082176	26.5496220773354	32.1000119905509	33.366518478195
YBR126C	66.3018608806866	117.048129598457	141.24921964887	153.194878340221	99.2228799148548	83.3285039051434	72.0805197355308	78.8472799436125	124.100457904068	92.4483372287012	110.738008389156	117.306563002541	156.619086719494	146.749372829679	107.346893287275	72.9932281850198	101.189504820861	99.1603699557033	110.27717385953	82.9860415994844	84.9374844574194	103.99072872408	166.366268483871	161.581419680936	104.481479710067	65.1059337451884	143.866244819432	81.3095210923528	250.539186521832	94.7043980519155	156.797827164259	157.666706236315	165.426711606001	174.294627948813	79.5156679035563	105.658561116679	78.4740991780053	99.5799737903985	81.5779697844124	74.953567948035	208.820028747581	77.4926534769943	122.51844205772	114.225140975337	62.8111013705286	93.0157451445476	80.3664235854478	144.450053957479	101.550273629289
YBR126W-A	4.05929760494	13.5707976346037	10.7898709453998	6.90067019550545	4.92595857733322	5.25495069672075	5.14860855253791	4.74269353044286	6.84018271912189	8.28847161360769	12.6557723873321	10.5050653435111	11.187077622821	7.89682723747149	7.66763523480532	9.31828444915147	5.20403167650141	2.60948341988693	4.50110913712368	4.97916249596906	8.3888873538192	11.7927630511844	6.93192785349464	7.06366861993164	3.83418274165383	6.64346262706004	35.966561204858	8.13095210923528	29.4155320207819	25.9020575868487	26.9759702648187	18.9783998247416	7.67443507450521	11.5742526372258	7.62479007294375	3.74012605722758	8.04862555671849	2.92882275854113	4.94411938087348	4.996904529869	22.4432741177307	7.87034761875723	8.35353014029906	3.77603771819295	7.04423566772283	11.0733029933985	10.045802948181	20.4272803576233	18.8593365311537
YBR127C	94.7169441152666	78.880261251134	84.3571728458528	66.2464338768523	71.7782535554269	70.5664807845359	55.8991785704116	60.4693425131464	68.4018271912189	62.4823244718118	91.7543498081576	77.0371458524148	90.3571654150928	87.5231685486424	60.0631426726417	62.1218963276765	57.2443484415155	71.1084231919188	53.2631247892968	54.7707874556597	88.0833172151016	93.2700350411854	90.1150620954303	67.987810466842	73.8080177768363	62.4485486943644	102.881093679012	56.2390854222107	107.51884117941	95.5138373515046	111.275877342377	81.0231684825506	83.5660708112789	70.8071926042051	69.7123663812	64.5171744871757	61.3707698699785	80.0544887334576	61.8014922609185	61.6284892017177	80.0151512023441	67.200660437081	72.3972612159252	83.0728298002449	56.3538853417827	73.0837997564303	71.0381779907083	141.531871049247	116.057455576331
YBR128C	8.11859520987999	22.052546156231	19.6179471734541	20.7020105865163	24.6297928866661	15.0141448477736	14.7103101501083	14.8209172826339	6.84018271912189	17.852092706232	12.6557723873321	21.0101306870222	27.5374218407902	22.3743438395026	16.6132096754115	18.6365688983029	16.1903207713377	16.3092713742933	12.0029576989965	13.2777666559175	12.5833310307288	18.2251792609213	23.3952565055444	28.2546744797265	17.2538223374423	14.6156177795321	55.2044892911773	12.8740075062892	54.7737492800766	33.1870112831499	20.231977698614	17.5185229151461	24.7287352400723	25.8718588361519	15.2495801458875	22.4407563433655	19.1154856972064	12.6915652870116	18.9524576266817	14.990713589607	18.5400960102992	9.08117032933527	19.4915703273645	16.9921697318683	18.7846284472609	17.7172847894376	16.5038191291545	72.9545727057976	46.4229822305322
YBR129C	23.0026864279933	14.4189724867664	12.7516656627452	16.5616084692131	10.5556255228569	12.0113158782189	16.9168566726246	9.48538706088571	6.84018271912189	15.3017937481988	11.0738008389156	12.2559095674296	11.187077622821	16.4517234113989	7.66763523480532	9.31828444915147	12.7209663203368	7.82845025966078	9.00221827424735	10.511565269268	13.6319419499562	10.7206936828949	10.397891780242	15.8932543948462	16.2952766520288	14.6156177795321	15.0557698066847	12.1964281638529	35.5015041630126	17.8076645909585	11.8019869908582	15.3287075507528	7.67443507450521	17.7017981510513	16.3388358705938	10.2853466573758	9.0547037513083	12.6915652870116	8.24019896812246	9.993809059738	7.80635621486284	11.5028157504913	17.6352302961869	8.49608486593414	9.97933386260734	16.6099544900978	5.74045882753199	26.2636461740871	23.2114911152661
YBR130C	12.17789281482	22.052546156231	10.7898709453998	9.66093827370763	8.44450041828552	21.019802786883	22.0654652251625	16.59942735655	18.5662102376165	14.6642190086905	17.4016870325816	22.7609749109407	11.187077622821	12.5033097926632	15.3352704696106	20.1896163064948	20.2379009641722	15.0045296643498	17.2542516923074	22.6828513705257	13.6319419499562	13.9369017877633	15.5968376703629	15.8932543948462	26.8392791915768	27.9025430336522	30.9479712692964	25.0704356701421	15.2149303555768	32.3775719835609	18.5459795570628	17.5185229151461	11.938010115897	12.2550910276509	18.5173473200063	25.2458508862862	18.1094075026166	13.6678395398586	20.6004974203062	23.3188878060553	10.7337397954364	15.1352838822254	15.7788902650093	16.04816030232	28.7639623098682	37.649230177555	30.1374088445429	20.4272803576233	42.0708276464198
YBR131W	37.8867776461066	33.9269940865093	48.0639705749626	46.9245573294371	28.8520430958089	35.2832403922679	44.8664459578304	40.9057317000696	34.2009135956094	35.7041854124639	31.6394309683302	38.5185729262074	48.1904882213828	37.5099293779896	44.727872203031	49.6975170621412	37.5846732191768	43.0564764281343	42.7605368026749	42.0462610770721	40.8958258498686	35.3782891535531	47.6570039927756	34.4353845221667	46.010192899846	38.5320832369482	53.5316259793235	43.3650779159215	19.272245117064	43.7097221778072	40.463955397228	37.2268611946854	58.8373355712066	43.5736569872032	44.6594847129563	38.3362920865827	42.2552841727721	37.0984216081877	42.8490346342368	53.3003149852693	33.1770139131671	28.4543336985838	54.7620309197383	42.4804243296707	45.2005122012215	54.2591846676528	50.9465720943464	29.181829082319	34.8172366728992
YBR132C	33.8274800411666	57.6758899470657	45.1212784989445	42.7841552121338	33.7780016731421	32.2804114227132	25.7430427626896	41.498568391375	37.1324204752331	33.1538864544308	56.9509757429944	57.7778593893111	58.5170214116792	50.0132391706528	44.727872203031	35.720090388414	37.0064474773434	44.3612181380778	39.0096125217385	37.067098581103	49.2847132036878	57.8917458876323	43.3245490843415	49.4456803395215	57.5127411248075	51.8190084910683	42.6580144522734	46.0753952856666	15.2149303555768	43.7097221778072	80.927910794456	58.3950763838202	50.310185488423	42.8928185967781	40.3024618141313	33.6611345150482	40.2431277835925	32.2170503439525	42.0250147374246	38.3096013956623	56.5960825577556	44.1950289360983	43.6239907326729	46.2564620478636	48.7226300350829	53.1518543683129	38.7480970858409	33.5591034446669	26.1129275046744
YBR133C	40.5929760494	38.1678683473229	51.9875600096535	33.1232169384262	49.9632941415227	38.2860693618226	51.4860855253791	42.6842417739857	50.8127859134769	44.6302317655799	37.9673171619963	38.5185729262074	32.7006884359384	44.7486876790051	40.8940545856284	51.2505644703331	54.9314454741816	32.6185427485866	45.761276227424	49.2383846823607	40.8958258498686	34.3062197852636	53.7224408645834	49.4456803395215	42.1760101581922	29.2312355590642	94.516777119743	50.1408713402842	64.9170361837945	102.798791047806	42.1499535387792	26.2777843727191	47.752040463588	43.5736569872032	43.57022898825	39.2713236008896	41.2492059781823	49.7899868951992	44.4970744278613	76.6192027913247	37.0801920205985	33.903035896185	46.4085007794392	56.6405657728943	36.395217616568	74.1911300557701	35.8778676720749	115.26822487516	110.254582797514
YBR135W	59.5363648724533	53.4350156862521	93.1852490739072	89.7087125415708	106.259963596759	114.107500843079	97.0880469907149	119.160174952377	85.0136995090863	119.226476288049	58.5329472914109	56.0270151653926	101.544243037914	95.4199957861139	107.346893287275	96.2889393078985	104.080633530028	111.555416200166	105.025879866219	94.6040874234122	56.6249896382796	61.1079539925008	116.109791546035	110.369822186432	148.574581239086	132.869252541201	97.0260720875238	132.127971775073	45.6447910667305	88.2288836552034	64.0679293789443	56.9351994742247	110.000236067908	79.6580916797308	117.639618268275	115.943907774055	137.832712658804	102.50879654894	118.658865140963	86.6130118510627	59.5234661383291	55.6978446865896	136.440992291551	107.617074968499	149.69000793911	111.840360233325	132.748110386677	94.8409445175369	78.3387825140231
YBR136W	18.9433888230533	24.5970707127192	61.7965335963805	77.287506189661	64.7411698735223	77.322845966034	88.2618609006499	107.896277817575	90.8767132683336	112.850728892966	17.4016870325816	28.0135075826963	52.4932103840063	71.7295140736994	74.1204739364514	82.3115126341713	101.767730562694	103.726965940505	105.776064722406	100.136490196711	20.972218384548	20.3693179975003	54.5889318462703	52.9775146494873	47.9272842706729	55.8050860673044	45.1673094200542	62.3372995041372	22.3152311881793	44.5191614773962	11.8019869908582	14.5987690959551	64.8063406291551	76.9347381180306	67.5338549317875	79.477678716086	98.5956630698015	114.224087583104	105.474546791968	88.2786466943523	10.7337397954364	18.7677520139595	53.8338609041495	31.1523111750918	67.5072584823438	33.2199089801956	47.3587853271389	26.2636461740871	31.9158002834909
YBR137W	17.5902896214067	15.2671473389292	25.5033313254904	20.7020105865163	21.1112510457138	11.2606086358302	22.0654652251625	19.5636108130768	17.589041277742	19.1272421852485	34.8033740651632	26.2626633587778	19.792521948068	19.0839991572228	24.2808449102169	26.4018059392625	17.3467722550047	22.1806090690389	21.7553608294311	18.2569291518866	22.0208293037754	27.8738035755267	25.1282384689181	34.4353845221667	33.5490989894711	23.9164654574162	40.9851511404195	25.0704356701421	23.3295598785511	33.9964505827389	33.7199628310233	32.1172920111011	15.3488701490104	17.7017981510513	16.3388358705938	22.4407563433655	16.097251113437	23.4305820683291	19.7764775234939	19.987618119476	19.5158905371571	24.8218655668497	23.2042503897196	30.2083017455436	14.6754909744226	38.7565604768948	33.7251956117504	43.7727436234786	47.8737004252364
YBR138C	8.11859520987999	12.722622782441	13.7325630214179	11.0410723128087	13.3704589956187	12.0113158782189	11.7682481200867	19.5636108130768	19.5433791974911	14.6642190086905	4.74591464524953	17.5084422391852	12.9081664878704	7.23875830101554	7.66763523480532	9.31828444915147	12.1427405785033	18.2663839392085	19.5048062608693	21.023130538536	13.6319419499562	11.7927630511844	12.9973647253024	10.5955029298975	20.1294593936826	15.9443103049441	52.6951943233965	25.0704356701421	19.272245117064	36.424768481506	6.74399256620467	11.679015276764	20.4651601986806	13.616767808501	10.8925572470625	13.0904412002965	20.1215638917962	17.5729365512468	14.0083382458082	31.6470620225037	13.66112337601	6.6595249081792	9.28170015588784	15.1041508727718	14.6754909744226	43.1858816742543	34.4427529651919	36.4772863528988	42.0708276464198
YBR139W	98.7762417202066	139.948850606851	199.12216381056	198.739301630557	154.815841001901	131.373767418019	131.657275843469	128.645562013262	120.19178206457	118.588901548541	94.9182929049907	131.313316793889	207.391208238451	198.736818809699	131.627738197491	147.539503778232	132.413694879869	126.559945864516	123.780501270901	112.307776297969	130.027753984198	127.576254826449	188.028543026042	196.016804203103	150.491672609913	132.869252541201	86.9888922164006	113.155750186858	157.220947007627	72.0400976634229	133.193853182542	148.177506323944	196.124451904022	169.528759215837	174.280915953	172.980830146776	144.875260020933	153.275057696986	117.010825347339	151.57277073936	150.27235713611	105.946987175578	164.286092759215	198.24198020513	122.687104546173	107.411039035966	81.8015382923308	103.595493242233	78.3387825140231
YBR140C	36.53367844446	35.6233437908347	67.6819177484168	46.9245573294371	47.1484606687608	50.2973852400415	38.982321897787	46.8340986131232	54.7214617529751	49.7308296816462	42.7132318072458	42.0202613740445	50.7721215189569	52.6455149164766	65.1748994958452	41.9322800211816	53.7749939905146	47.6230724129364	42.0103519464876	48.131904127701	40.8958258498686	37.5224278901321	42.4580581026547	55.6263903819616	49.8443756414999	53.1477010164803	33.4572662370772	41.3323398886127	49.7021058282176	38.043647080684	35.4059609725745	32.8472304658989	40.9303203973611	44.2544953776282	59.9090648588438	41.1413866295034	54.3282225078498	57.6001809179756	52.7372733959838	49.96904529869	34.1528084400249	29.6651564091619	52.9056908885607	50.9765091956048	42.265414006337	23.2539362861369	43.0534412064899	45.2318350775945	44.9722640358281
YBR141C	8.11859520987999	9.32992337379005	4.90448679336354	2.76026807820218	4.92595857733322	1.50141448477736	5.14860855253791	7.70687698696964	1.95433791974911	3.8254484370497	6.32788619366604	7.00337689567408	2.58163329757408	3.29034468227979	3.83381761740266	4.65914222457573	2.89112870916745	3.91422512983039	3.00073942474912	4.42592221863917	7.3402764345918	3.21620810486846	3.46596392674732	4.41479288745727	2.87563705624038	6.64346262706004	3.34572662370772	1.35515868487255	10.1432869037179	8.09439299589022	6.74399256620467	3.64969227398876	0.852715008278356	2.7233535617002	4.357022898825	0.935031514306895	11.0668601404879	5.85764551708226	4.12009948406123	1.66563484328967	5.85476716114713	10.2919930399133	0.928170015588784	2.83202828864471	5.87019638976903	5.53665149669926	5.74045882753199	5.83636581646381	13.0564637523372
YBR141W-A	2.70619840329333	1.69634970432546	10.7898709453998	8.28080423460654	4.22225020914276	6.75636518149811	6.61963956754874	3.55702014783214	3.90867583949822	5.10059791606627	0	5.25253267175556	5.16326659514816	7.89682723747149	5.11175682320355	1.55304740819191	4.04758019283443	4.56659598480212	3.00073942474912	3.31944166397938	1.0486109192274	4.28827747315795	6.06543687180781	2.64887573247436	1.91709137082692	2.65738505082402	5.01858993556158	5.42063473949019	2.02865738074358	4.04719649794511	5.0579944246535	2.18981536439326	6.82172006622685	3.40419195212525	4.357022898825	7.48025211445516	9.0547037513083	2.92882275854113	3.29607958724899	1.66563484328967	1.95158905371571	1.81623406586705	5.56902009353271	3.77603771819295	6.45721602874593	3.32199089801956	5.02290147409049	8.75454872469571	8.70430916822479
YBR142W	66.3018608806866	41.5605677559738	12.7516656627452	19.3218765474153	15.4815841001901	16.5155593325509	19.8589187026462	24.3063043435196	20.5205481573657	26.1405643198397	37.9673171619963	33.2660402544519	20.6530663805926	14.4775166020311	8.94557444060621	15.5304740819191	16.7685465131712	22.8329799240106	18.754621404682	14.3842472105773	48.2361022844604	50.3872603096059	15.5968376703629	15.8932543948462	9.58545685413459	9.30084767788406	24.2565180218809	11.5188488214167	26.3725459496665	12.1415894938353	23.6039739817163	32.1172920111011	17.9070151738455	20.4251517127515	21.785114494125	14.9605042289103	23.1397984755657	20.5017593097879	16.4803979362449	24.984522649345	27.3222467520199	64.7790150159249	15.7788902650093	9.44009429548238	15.2625106133995	15.5026241907579	17.9389338360375	13.1318230870436	27.5636456993785
YBR143C	109.60103533338	55.9795402427403	19.6179471734541	31.7430828993251	29.5557514639993	35.2832403922679	31.6271668227329	43.2770784652911	31.2694067159858	33.1538864544308	63.2788619366604	57.7778593893111	18.0714330830186	26.9808263946943	43.4499329972302	32.6139955720301	33.5370930263424	43.708847283106	28.5070245351166	30.4282152531443	62.916655153644	82.5493413582905	32.0601663224127	26.4887573247436	39.3003731019518	33.2173131353002	26.7658129896617	33.8789671218137	87.2322673719738	23.4737396880816	45.5219498218815	49.6358149262472	25.5814502483507	29.2760507882771	38.1239503647188	31.7910714864344	26.1580330593351	46.8611641366581	42.8490346342368	41.6408710822417	59.5234661383291	94.4441714250868	31.5577805300187	28.3202828864471	55.1798460638288	32.1125786808557	50.9465720943464	37.9363778070148	36.2679548676033
YBR145W	29.7681824362266	32.2306443821838	17.6561524561087	11.0410723128087	8.44450041828552	7.50707242388679	5.14860855253791	8.299713678275	6.84018271912189	7.01332213459113	26.8935163230807	22.7609749109407	13.7687109203951	17.1097923478549	12.7793920580089	12.4243792655353	10.9862890948363	13.0474170994346	8.25203341806007	7.74536388261854	18.8749965460932	26.8017342072372	15.5968376703629	15.8932543948462	4.79272842706729	3.98607757623602	5.01858993556158	7.45337276679901	12.1719442844615	7.2849536963012	32.0339646894722	27.7376612823146	11.938010115897	17.0209597606262	13.071068696475	15.8955357432172	12.0729383350777	9.76274252847044	7.41617907131022	18.3219832761863	28.2980412788778	21.7948087904046	9.28170015588784	8.49608486593414	6.45721602874593	8.85864239471882	10.045802948181	7.29545727057976	11.6057455576331
YBR146W	48.71157125928	43.2569174602993	17.6561524561087	24.8424127038196	30.2594598321898	27.7761679683811	33.0981978377437	18.9707741217714	13.6803654382438	25.5029895803314	37.9673171619963	47.2727940458	27.5374218407902	27.6388953311502	25.5587841160177	27.9548533474544	23.7072554151731	22.8329799240106	36.0088730969894	27.1087735891649	59.7708223959618	68.6124395705272	33.7931482857864	33.5524259446753	31.6320076186441	42.5181608131843	46.0037410759811	29.1359117247598	34.4871754726408	38.853086380273	42.1499535387792	42.3364303782697	28.9923102814641	28.5952123978521	37.0346946400125	24.3108193719793	27.1641112539249	30.2645018382584	24.7205969043674	18.3219832761863	39.0317810743142	60.5411355289018	34.342290576785	30.2083017455436	39.3303158114525	50.9371937696332	31.5725235514259	51.0682008940583	36.2679548676033
YBR149W	142.0754161729	215.436412449334	200.103061169232	184.937961239546	125.963797906092	108.852550146358	119.889027723383	106.710604434964	87.9452063887099	108.387705716408	153.451240196402	192.592864631037	197.92521948068	195.446474127419	130.34979899169	133.562077104504	94.8290216606924	88.7224362761556	93.7731070234099	92.9443665914225	120.590255711151	153.305919665397	156.834867685316	149.219999596056	77.6422005184902	91.6797842534286	45.1673094200542	52.8511887100293	58.8310640415637	41.2814042790401	202.31977698614	250.368889995629	196.9771669123	181.103011853063	101.300782397681	113.138813231134	111.674679599469	131.797024134351	83.2260095780369	104.934995127249	166.860864092693	125.320150544827	147.579032478617	137.825376714043	69.8553370382514	34.3272392795354	40.9007691461654	37.9363778070148	34.8172366728992
YBR150C	37.8867776461066	33.9269940865093	31.3887154775266	51.0649594467403	35.8891267777135	33.7818259074906	25.7430427626896	40.9057317000696	33.2237446357349	31.2411622359059	36.3853456135798	38.5185729262074	29.2585107058396	43.4325498060932	31.9484801450222	48.1444696539493	32.3806415426754	32.6185427485866	40.5099822341131	35.9606180264432	27.2638838999124	38.5944972584216	20.7957835604839	27.3717159022351	15.3367309666153	14.6156177795321	24.2565180218809	23.7152769852696	87.2322673719738	21.0454217893146	45.5219498218815	35.0370458302921	36.6667453559693	42.2119802063531	41.3917175388375	30.8560399721275	28.1701894485147	22.454307815482	31.3127560788654	23.3188878060553	37.0801920205985	30.2705677644509	19.4915703273645	15.1041508727718	12.327412418515	22.1466059867971	17.221376482596	80.2500299763773	43.521545841124
YBR151W	41.9460752510466	48.3459665732757	58.8538415203624	49.6848254076392	65.4448782417128	66.0622373302038	88.2618609006499	75.2902597957803	90.8767132683336	96.9113604052592	53.7870326461614	61.2795478371482	45.6088549238088	48.0390323612849	83.0660483770577	79.2054178177875	80.9516038566886	76.3273900316926	97.5240313043463	85.199002708804	32.5069384960494	43.954844099869	71.9187514800069	57.3923075369446	91.0618401142786	81.0502440501325	68.5873957860082	72.5009896406813	28.4012033304101	59.0890688699986	62.3819312373932	50.365753381045	71.6280606953819	60.5946167478294	76.2479007294375	71.062395087324	87.5288029293136	117.152910341645	103.826506998343	78.2848376346143	50.7413153966084	30.8759791197399	64.0437310756261	57.5845752024425	87.4659262075585	78.6204512531295	66.0152765166178	42.3136521693626	37.7186730623074
YBR153W	20.2964880247	25.4452455648819	12.7516656627452	9.66093827370763	16.889000836571	12.7620231206075	13.9747946426029	12.4495705174125	13.6803654382438	17.852092706232	20.5656301294146	17.5084422391852	12.9081664878704	13.1613787291192	17.8911488812124	15.5304740819191	13.8774178040038	18.2663839392085	15.0036971237456	15.4907277652371	15.729163788411	24.6575954706582	14.7303466886761	20.3080472823035	21.0880050790961	21.2590804065921	21.7472230541002	23.0376976428333	23.3295598785511	26.7114968864377	13.4879851324093	16.7885844603483	10.2325800993403	18.3826365414763	7.62479007294375	11.2203781716827	14.0850947242574	11.7152910341645	16.4803979362449	14.990713589607	16.5885069565835	21.1893974351156	14.8507202494205	16.9921697318683	17.6105891693071	37.649230177555	22.9618353101279	24.8045547199712	18.8593365311537
YBR154C	82.5390513004466	45.8014420167875	9.80897358672707	5.52053615640436	11.9630422592378	14.2634376053849	13.2392791350975	13.6352439000232	16.6118723178674	12.7514947901657	55.3690041945779	59.5287036132296	7.74489989272224	7.23875830101554	17.8911488812124	21.7426637146868	12.7209663203368	16.961642229265	11.2527728428092	11.0648055465979	69.2083206690084	54.6755377827639	13.8638557069893	7.06366861993164	19.1709137082692	14.6156177795321	13.3829064948309	12.8740075062892	36.5158328533844	6.47551439671217	72.4979200867002	53.285507200236	3.41086003311343	9.53173746595069	11.9818129717688	14.9605042289103	14.0850947242574	20.5017593097879	11.5362785553714	16.6563484328967	55.6202880308977	60.5411355289018	6.49719010912149	10.3841037250306	19.9586677252147	13.2879635920782	14.35114706883	8.75454872469571	11.6057455576331
YBR155W	23.0026864279933	13.5707976346037	5.88538415203624	2.76026807820218	5.62966694552368	9.75919415105283	6.61963956754874	8.89255036958036	6.84018271912189	7.65089687409941	14.2377439357486	14.0067537913482	10.3265331902963	7.89682723747149	8.94557444060621	4.65914222457573	4.04758019283443	7.82845025966078	9.75240313043463	7.74536388261854	17.8263856268658	18.2251792609213	5.19894589012098	3.53183430996582	3.83418274165383	9.30084767788406	18.4014964303924	9.48611079410783	18.2579164266922	19.4265431901365	18.5459795570628	13.1388921863596	4.26357504139178	4.76586873297535	5.44627862353125	2.80509454292068	5.03039097294906	4.88137126423522	8.24019896812246	3.33126968657933	7.80635621486284	27.2435109880058	6.49719010912149	5.66405657728943	9.97933386260734	9.96597269405867	12.916032361947	30.640920536435	33.366518478195
YBR156C	14.8840912181133	14.4189724867664	35.3123049122174	38.6437530948305	40.8150853550467	41.2888983313774	78.7001593030795	68.7690561914214	75.2420099103407	69.495646606403	23.7295732262477	12.2559095674296	47.3299437888581	46.064825551917	42.1719937914293	46.5914222457573	55.509671216015	57.4086352375124	84.7708887491626	80.7730804901648	19.9236074653206	7.50448557802641	50.2564769378361	43.2649702970813	73.8080177768363	57.1337785927164	46.840172731908	70.4682516133725	23.3295598785511	61.5173867687657	15.1739832739605	16.0586460055506	38.372175372526	22.4676668840266	27.2313931176563	47.6866072296516	57.3464570916192	78.1019402277635	79.9299299907879	81.6161073211937	25.3706576983042	16.3461065928035	30.6296105144299	33.9843394637366	54.005806785875	50.9371937696332	66.7328338700593	36.4772863528988	40.6201094517157
YBR157C	1.35309920164667	0.848174852162731	3.92358943469083	1.38013403910109	0	2.25212172716604	1.47103101501083	1.18567338261071	2.93150687962367	5.10059791606627	0	0	1.72108886504939	1.97420680936787	0	0	2.31290296733396	1.30474170994346	3.00073942474912	2.76620138664948	1.0486109192274	0	3.46596392674732	0.882958577491455	0	0	5.01858993556158	1.35515868487255	49.7021058282176	2.42831789876707	1.68599814155117	2.18981536439326	3.41086003311343	0.680838390425049	2.1785114494125	1.87006302861379	0	1.95254850569409	0.824019896812246	0	0.975794526857855	0	0.928170015588784	1.88801885909648	1.17403927795381	2.21466059867971	0	7.29545727057976	5.80287277881653
YBR158W	14.8840912181133	13.5707976346037	26.4842286841631	17.9417425083142	10.5556255228569	6.75636518149811	5.88412406004333	9.48538706088571	12.7031964783692	7.65089687409941	14.2377439357486	14.0067537913482	18.9319775155433	17.1097923478549	10.2235136464071	17.083521490111	7.51693464383537	4.56659598480212	6.75166370568551	12.7245263785876	11.5347201115014	6.43241620973693	25.9947294506049	44.1479288745727	10.544002539548	10.6295402032961	10.0371798711232	4.74305539705392	14.200601665205	13.7604680930134	16.8599814155117	16.7885844603483	22.1705902152373	16.3401213702012	8.71404579765001	3.74012605722758	9.0547037513083	2.92882275854113	8.24019896812246	8.32817421644833	13.66112337601	8.47575897404625	35.2704605923738	35.872358322833	11.1533731405612	3.32199089801956	9.32824559473948	14.5909145411595	5.80287277881653
YBR159W	28.41508323458	60.2204145035539	43.1594837815991	51.0649594467403	56.2966694552368	50.2973852400415	55.1636630629062	53.9481389087875	53.7442927931005	52.2811286396793	37.9673171619963	26.2626633587778	49.0510326539075	52.6455149164766	60.0631426726417	49.6975170621412	56.666122699682	52.1896683977386	39.0096125217385	54.2175471783298	33.5555494152768	33.2341504169741	71.9187514800069	49.4456803395215	56.5541954393941	54.4763935418923	120.446158453478	51.4960300251568	109.547498560153	95.5138373515046	43.8359516803303	46.7160611070562	40.9303203973611	51.7437176723038	53.3735305106063	54.2318278297999	48.2917533403109	52.7188096537404	50.265213705547	68.2910285748763	40.007575601172	41.7733835149422	69.6127511691588	50.0324997660566	51.6577282299674	84.1571027498288	71.0381779907083	125.481865053972	117.508173771035
YBR160W	32.47438083952	13.5707976346037	42.1785864229264	59.3457636813469	52.074419246094	72.0678952693132	62.5188181379603	64.6191993522839	86.9680374288354	71.4083708249278	18.9836585809981	35.0168844783704	50.7721215189569	54.6197217258445	61.3410818784426	57.4627541031007	56.0878969578485	63.9323437872297	72.7679310501661	63.0693916156081	38.7986040114138	31.0900116803951	64.1203326448254	48.56272176203	96.8131142267593	78.3928589993085	154.739856346482	96.8938459683871	77.0889804682559	104.417669646984	23.6039739817163	21.8981536439326	34.1086003311343	53.7862328435789	62.0875763082563	68.2573005444033	69.419395426697	72.2442947106813	82.4019896812246	78.2848376346143	27.3222467520199	30.2705677644509	81.678961371813	62.3046223501837	79.2476512618819	151.70425100956	93.2824559473948	113.809133421044	110.254582797514
YBR161W	14.8840912181133	14.4189724867664	26.4842286841631	17.9417425083142	18.296417572952	16.5155593325509	14.7103101501083	14.8209172826339	8.794520638871	15.3017937481988	7.90985774208256	19.2592864631037	24.9557885432161	17.1097923478549	16.6132096754115	18.6365688983029	16.7685465131712	12.3950462444629	15.0036971237456	11.0648055465979	8.3888873538192	8.5765549463159	23.3952565055444	14.1273372398633	10.544002539548	6.64346262706004	8.36431655926929	10.1636901365441	28.4012033304101	12.1415894938353	11.8019869908582	16.7885844603483	17.0543001655671	18.3826365414763	22.8743702188313	14.0254727146034	12.0729383350777	14.6441137927057	13.1843183489959	23.3188878060553	7.80635621486284	6.6595249081792	17.6352302961869	13.2161320136753	7.04423566772283	8.85864239471882	5.74045882753199	13.1318230870436	7.25359097352066
YBR162C	125.83822575314	114.503605041969	136.344732855506	129.732599675502	119.630422592378	124.617402236521	97.8235624982203	104.932094361048	103.579909746703	104.562257279359	118.647866131238	138.316693689563	131.663298176278	111.213650261057	126.515981374288	119.584650430777	101.767730562694	133.736025269205	111.027358715717	128.351744340536	126.881921226515	140.441087245923	121.308737436156	135.975620933684	81.476383260144	100.980631931313	116.264000173843	86.730155831843	116.647799392756	102.798791047806	128.135858757889	108.760829764865	135.581686316259	129.359294180759	124.175152616513	108.4636556596	105.63821043193	117.152910341645	112.890725863278	98.2724557540903	111.240576061795	120.476859702515	141.081842369495	133.105329566302	85.1178476516509	128.450314723423	84.6717677060968	160.500059952755	116.057455576331
YBR162W-A	139.369217769607	140.797025459013	48.0639705749626	48.3046913685381	87.9635460238075	90.8355763290302	100.030109020737	80.0329533262232	90.8767132683336	72.0459455644361	143.959410905903	141.8183821374	61.9591991417779	69.0972383278756	66.4528387016461	91.6297970833228	79.2169266311881	82.85109858141	73.5181159063534	82.4328013221545	155.194416045655	162.954543980002	82.3166432602488	65.3389347343677	91.0618401142786	127.554482439553	103.717525334939	91.4732112288969	106.504512489038	83.3722478576693	134.879851324093	141.608060230764	47.752040463588	62.6371319191045	72.9801335553188	100.048372030838	103.626054042751	73.2205689635283	79.9299299907879	88.2786466943523	161.006096931546	153.169072888121	84.4634714185794	102.897027820758	109.772672488681	96.3377360425672	108.351160369666	137.154596686899	100.099555434585
YBR163W	6.76549600823333	9.32992337379005	7.84717886938166	16.5616084692131	14.7778757319997	12.7620231206075	10.2972171050758	7.11404029566428	10.7488585586201	10.2011958321325	7.90985774208256	10.5050653435111	10.3265331902963	13.1613787291192	5.11175682320355	7.76523704095956	9.25161186933584	14.3521588093781	10.5025879866219	10.511565269268	8.3888873538192	10.7206936828949	6.06543687180781	13.2443786623718	7.66836548330767	3.98607757623602	20.9107913981732	12.8740075062892	21.3009024978076	20.2359824897255	3.37199628310233	8.02932300277528	8.52715008278356	11.5742526372258	6.5355343482375	11.2203781716827	8.04862555671849	7.81019402277635	9.88823876174696	13.3250787463173	1.95158905371571	9.08117032933527	8.35353014029906	11.3281131545789	11.1533731405612	19.9319453881173	10.7633603016225	29.181829082319	18.8593365311537
YBR164C	18.9433888230533	18.6598467475801	14.7134603800906	6.90067019550545	9.85191715466644	12.7620231206075	12.5037636275921	14.2280805913286	19.5433791974911	19.7648169247568	15.8197154841651	12.2559095674296	8.60544432524694	11.1871719197513	15.3352704696106	6.21218963276765	17.9249979968382	11.7426753894912	12.7531425551838	18.8101694292165	15.729163788411	13.9369017877633	14.7303466886761	7.94662719742309	22.0465507645096	10.6295402032961	22.5836547100271	20.3273802730882	9.1289582133461	12.9510287934243	15.1739832739605	19.7083382795393	5.9690050579485	17.0209597606262	7.62479007294375	12.1554096859896	15.0911729188472	12.6915652870116	17.3044178330572	9.993809059738	16.5885069565835	15.7406952375145	12.994380218243	7.5520754363859	18.7846284472609	16.6099544900978	15.0687044222715	7.29545727057976	15.9579001417455
YBR165W	18.9433888230533	16.9634970432546	12.7516656627452	17.9417425083142	11.9630422592378	14.2634376053849	18.3878876876354	18.9707741217714	16.6118723178674	24.8654148408231	14.2377439357486	17.5084422391852	25.8163329757408	15.135585538487	14.0573312638098	6.21218963276765	17.9249979968382	17.6140130842368	19.5048062608693	18.8101694292165	18.8749965460932	21.4413873657898	12.9973647253024	21.1910058597949	14.3781852812019	10.6295402032961	42.6580144522734	13.5515868487255	45.6447910667305	50.1852365745194	10.115988849307	21.8981536439326	19.6124451904022	14.9784445893511	19.6066030447125	17.765598771831	22.1337202809759	31.2407760911054	25.5446168011796	14.990713589607	18.5400960102992	13.9244611716474	20.4197403429533	14.1601414432236	14.6754909744226	36.5418998782151	28.7022941376599	93.3818530634209	62.3808823722777
YBR166C	17.5902896214067	21.2043713040683	11.7707683040725	12.4212063519098	19.7038343093329	19.5183883021057	19.1234031951408	16.59942735655	29.3150687962367	19.7648169247568	7.90985774208256	17.5084422391852	13.7687109203951	10.5291029832953	16.6132096754115	21.7426637146868	15.0338692876707	24.7900924889258	21.7553608294311	22.1296110931958	20.972218384548	12.8648324194739	12.1308737436156	18.5421301273205	21.0880050790961	22.5877729320041	81.1338706249121	22.360118300397	36.5158328533844	63.1362653679437	18.5459795570628	12.4089537315618	15.3488701490104	22.4676668840266	16.3388358705938	18.7006302861379	22.1337202809759	23.4305820683291	24.7205969043674	26.6501574926347	11.7095343222943	14.5298725269364	10.2098701714766	7.5520754363859	15.2625106133995	53.1518543683129	25.1145073704524	87.5454872469571	88.493809876952
YBR167C	27.0619840329333	18.6598467475801	11.7707683040725	11.0410723128087	16.1852924683806	9.75919415105283	21.3299497176571	11.2638971348018	13.6803654382438	10.8387705716408	12.6557723873321	5.25253267175556	14.6292553529198	16.4517234113989	16.6132096754115	10.8713318573434	10.4080633530028	15.6569005193216	12.0029576989965	14.9374874879072	17.8263856268658	20.3693179975003	12.1308737436156	14.1273372398633	11.5025482249615	15.9443103049441	40.1487194844926	16.9394835609068	33.472846782269	47.7569186757523	13.4879851324093	13.1388921863596	14.4961551407321	8.85089907552564	13.071068696475	9.35031514306895	9.0547037513083	11.7152910341645	17.3044178330572	11.6594439030277	19.5158905371571	12.7136384610694	17.6352302961869	14.1601414432236	14.0884713354457	42.0785513749144	20.091605896362	49.6091094399424	50.7751368146446
YBR168W	17.5902896214067	11.8744479302782	13.7325630214179	16.5616084692131	15.4815841001901	13.5127303629962	16.9168566726246	12.4495705174125	24.4292239968639	17.852092706232	12.6557723873321	15.7575980152667	15.4897997854445	16.4517234113989	17.8911488812124	20.1896163064948	12.7209663203368	18.2663839392085	20.2549911170565	19.9166499838763	23.0694402230028	16.0810405243423	19.0628015971103	18.5421301273205	14.3781852812019	18.6016953557681	209.944345637659	21.6825389579608	117.662128083127	139.223559529312	6.74399256620467	19.7083382795393	17.0543001655671	19.0634749319014	13.071068696475	17.765598771831	16.097251113437	14.6441137927057	16.4803979362449	24.984522649345	18.5400960102992	13.9244611716474	14.8507202494205	16.9921697318683	10.5663535015842	110.733029933985	44.4885559133729	250.963730107944	139.268946691597
YBR169C	32.47438083952	39.0160431994857	85.3380702045255	106.270321010784	86.5561292874266	87.0820401170868	116.946965693361	117.974501569766	109.44292350595	110.938004674441	49.0411180009118	52.5253267175556	91.2177098476175	87.5231685486424	89.4557444060621	91.6297970833228	113.910471141198	109.598303635251	101.274955585283	118.393419348598	47.187491365233	37.5224278901321	105.711899765793	88.2958577491455	134.196395957884	95.6658618296646	233.364432003613	88.0853145167156	201.851409383986	232.309078982049	67.4399256620467	48.9058764714494	104.031231009959	95.998213049932	92.5867366000313	112.203781716827	111.674679599469	109.342716318869	112.066705966465	113.263169343697	65.3782332994763	53.2761992654336	108.595891823888	85.9048580888896	126.209222380034	153.91891160824	131.312995679794	299.11374809377	250.974247683815
YBR170C	25.7088848312866	33.0788192343465	32.3696128361993	35.8834850166283	34.4817100413325	27.7761679683811	28.6851047927112	33.1988547131	31.2694067159858	29.3284380173811	30.0574594199137	38.5185729262074	33.561232868463	28.2969642676062	17.8911488812124	20.1896163064948	27.176609866174	38.4898804433322	27.7568396789293	29.8749749758144	37.7499930921864	40.7386359950005	26.8612204322917	30.9035502122009	32.5905533040576	25.2451579828282	27.6022446455887	27.7807530398872	27.3868746400383	21.8548610889036	45.5219498218815	37.9567996494832	31.5504553062992	29.2760507882771	30.499160291775	28.9859769435137	30.1823458376943	34.1695988496465	23.0725571107429	36.6439665523727	37.0801920205985	37.5355040279191	21.347910358542	25.4882545978024	33.4601194216835	32.1125786808557	40.9007691461654	17.5090974493914	29.0143638940826
YBR171W	32.47438083952	30.5342946778583	15.6943577387633	6.90067019550545	13.3704589956187	21.019802786883	11.7682481200867	10.6710604434964	18.5662102376165	17.852092706232	28.4754878714972	12.2559095674296	12.9081664878704	5.92262042810362	10.2235136464071	12.4243792655353	16.7685465131712	13.6997879544064	18.0044365484947	11.6180458239278	22.0208293037754	36.4503585218426	19.9292925787971	16.7762129723376	23.005096449923	11.9582327287081	18.4014964303924	21.6825389579608	22.3152311881793	14.5699073926024	15.1739832739605	27.0077228275169	16.2015851572888	12.9359294180759	9.80330152235626	23.3757878576724	20.1215638917962	25.3831305740231	11.5362785553714	6.66253937315867	23.4190686445885	30.2705677644509	16.7070602805981	15.1041508727718	25.8288641149837	22.1466059867971	17.221376482596	11.6727316329276	4.3521545841124
YBR172C	36.53367844446	39.0160431994857	12.7516656627452	15.181474430112	9.14820878647598	9.75919415105283	11.0327326125812	7.11404029566428	7.81735167899644	8.28847161360769	22.1476016778312	15.7575980152667	8.60544432524694	13.1613787291192	8.94557444060621	9.31828444915147	13.8774178040038	11.0903045345194	14.2535122675583	9.40508471460823	39.8472149306412	37.5224278901321	12.9973647253024	10.5955029298975	9.58545685413459	15.9443103049441	16.7286331185386	12.1964281638529	10.1432869037179	16.1887859917804	47.2079479634327	29.9274766467079	11.938010115897	10.2125758563757	11.9818129717688	11.2203781716827	10.0607819458981	7.81019402277635	9.06421886493471	11.6594439030277	23.4190686445885	39.9571494490752	9.28170015588784	9.44009429548238	8.21827494567664	11.0733029933985	16.5038191291545	11.6727316329276	13.0564637523372
YBR173C	185.374590625593	224.766335823124	211.873829473305	219.441312217073	149.186174056377	141.88366881146	150.045163531105	157.10172319592	149.506850860807	174.057903885762	218.312073681479	183.838643511445	172.108886504939	205.975577110715	148.240947872903	127.349887471737	175.202399775547	150.045296643498	148.536601525081	164.865602644309	183.506910864795	200.476971870134	193.227488916163	240.164733077676	247.304786836672	243.150732150398	160.59487793797	257.480150125784	91.2895821334609	158.650102719448	278.189693355942	261.317966817596	221.705902152373	194.038941271139	144.871011385931	171.110767118162	155.942120161421	171.82426850108	168.92407884651	136.582057149753	230.287508338454	184.65046336315	245.965054131028	228.450281950674	253.005464399045	235.861353759389	246.122172230434	119.645499237508	142.170383081005
YBR175W	4.05929760494	4.24087426081366	7.84717886938166	5.52053615640436	5.62966694552368	11.2606086358302	3.67757753752708	8.299713678275	11.7260275184947	12.1139200506574	1.58197154841651	1.75084422391852	6.02381102767285	5.92262042810362	8.94557444060621	9.31828444915147	12.7209663203368	17.6140130842368	15.0036971237456	8.85184443727834	1.0486109192274	6.43241620973693	7.79841883518147	7.06366861993164	9.58545685413459	7.97215515247205	13.3829064948309	11.5188488214167	3.04298607111536	9.71327159506826	5.0579944246535	8.75926145757304	7.67443507450521	10.8934142468008	9.80330152235626	11.2203781716827	10.0607819458981	12.6915652870116	14.8323581426204	6.66253937315867	3.90317810743142	7.87034761875723	8.35353014029906	12.2721225841271	10.5663535015842	6.64398179603912	15.786261775713	8.75454872469571	7.25359097352066
YBR176W	5.41239680658666	13.5707976346037	8.82807622805436	5.52053615640436	10.5556255228569	3.7535362119434	8.82618609006499	8.89255036958036	2.93150687962367	9.56362109262426	18.9836585809981	8.75422111959259	11.187077622821	13.1613787291192	19.1690880870133	10.8713318573434	9.82983761116933	7.17607940468905	7.50184856187279	6.63888332795875	11.5347201115014	16.0810405243423	10.397891780242	5.29775146494873	5.75127411248075	5.31477010164803	7.52788490334236	10.1636901365441	2.02865738074358	8.90383229547924	10.115988849307	18.2484613699438	8.52715008278356	5.44670712340039	9.80330152235626	3.74012605722758	5.03039097294906	15.6203880455527	7.41617907131022	9.993809059738	9.75794526857855	14.5298725269364	8.35353014029906	4.72004714774119	8.80529458465354	4.42932119735941	8.61068824129798	2.9181829082319	13.0564637523372
YBR177C	77.1266544938599	84.8174852162732	30.4078181188539	35.8834850166283	40.8150853550467	44.2917273009321	50.7505700178737	40.9057317000696	35.178082555484	40.1672085890219	82.2625205176586	52.5253267175556	18.0714330830186	26.3227574582383	43.4499329972302	17.083521490111	47.9927365721797	43.708847283106	33.0081336722403	37.067098581103	72.3541534266906	78.2610638851326	35.52613024916	25.6057987472522	45.0516472144326	33.2173131353002	38.4758561726387	48.1081333129754	12.1719442844615	27.5209361860267	96.1018940684165	88.3225530305281	35.814030347691	37.4461114733777	39.213206089425	46.7515757153447	33.2005804214638	45.8848898838111	51.9132534991715	36.6439665523727	83.9183293097755	60.5411355289018	26.9169304520747	37.7603771819295	31.6990605047527	24.3612665854768	45.2061132668144	30.640920536435	20.3100547258578
YBR179C	28.41508323458	22.052546156231	17.6561524561087	33.1232169384262	15.4815841001901	18.0169738173283	16.9168566726246	17.7851007391607	23.4520550369893	28.0532885383645	25.3115447746642	14.0067537913482	24.9557885432161	17.7678612843109	21.7249664986151	15.5304740819191	15.0338692876707	20.2234965041237	29.2572093913039	18.8101694292165	26.215272980685	35.3782891535531	19.9292925787971	22.0739644372864	29.7149162478172	27.9025430336522	40.1487194844926	20.3273802730882	47.6734484474741	46.1380400765742	18.5459795570628	11.679015276764	28.1395952731858	19.0634749319014	20.6958587694188	16.8305672575241	24.1458766701555	12.6915652870116	19.7764775234939	26.6501574926347	24.3948631714464	23.6110428562717	14.8507202494205	22.6562263091577	21.1327070031685	33.2199089801956	24.3969500170109	86.0863957928412	39.1693912570116
YBR180W	8.11859520987999	6.78539881730185	3.92358943469083	4.14040211730327	4.22225020914276	6.00565793910943	9.56170159757041	12.4495705174125	54.7214617529751	35.0666106729556	7.90985774208256	12.2559095674296	6.88435546019755	2.63227574582383	5.11175682320355	10.8713318573434	10.4080633530028	10.4379336795477	49.5122005083604	45.3657027410515	12.5833310307288	11.7927630511844	3.46596392674732	8.82958577491455	18.2123680228557	10.6295402032961	746.097037086821	67.0803549011911	389.502217102767	554.46592021848	8.42999070775583	9.48919991237079	8.52715008278356	9.53173746595069	5.44627862353125	12.1554096859896	10.0607819458981	25.3831305740231	22.2485372139306	79.950472477904	4.87897263428927	8.47575897404625	4.64085007794392	4.72004714774119	9.97933386260734	432.966147041882	185.847354541348	764.563921956759	606.400205386327
YBR182C	18.9433888230533	20.3561964519056	3.92358943469083	4.14040211730327	3.5185418409523	2.25212172716604	5.88412406004333	2.96418345652679	7.81735167899644	5.10059791606627	15.8197154841651	22.7609749109407	2.58163329757408	3.94841361873575	0	1.55304740819191	3.46935445100094	4.56659598480212	5.25129399331096	6.08564305062886	9.4374982730466	7.50448557802641	3.46596392674732	1.76591715498291	4.79272842706729	0	10.8736115270501	3.38789671218137	4.05731476148715	9.71327159506826	6.74399256620467	18.2484613699438	2.55814502483507	6.12754551382544	3.26776717411875	2.80509454292068	6.03646916753887	5.85764551708226	4.12009948406123	6.66253937315867	14.6369179028678	6.05411355289018	2.78451004676635	6.60806600683766	4.10913747283832	13.2879635920782	6.45801618097348	8.75454872469571	5.80287277881653
YBR183W	21.6495872263466	23.7488958605565	15.6943577387633	23.4622786647185	11.2593338910474	14.2634376053849	11.7682481200867	12.4495705174125	12.7031964783692	16.5769432272154	22.1476016778312	15.7575980152667	20.6530663805926	13.8194476655751	8.94557444060621	7.76523704095956	9.25161186933584	17.6140130842368	11.2527728428092	11.6180458239278	18.8749965460932	20.3693179975003	12.9973647253024	17.6591715498291	17.2538223374423	9.30084767788406	7.52788490334236	13.5515868487255	7.10030083260252	9.71327159506826	26.9759702648187	22.6280920987303	21.3178752069589	18.3826365414763	25.0528816682438	12.1554096859896	13.0790165296675	11.7152910341645	8.24019896812246	11.6594439030277	10.7337397954364	18.1623406586705	8.35353014029906	16.9921697318683	12.9144320574919	4.42932119735941	10.045802948181	4.37727436234786	17.4086183364496
YBR184W	9.47169441152666	4.24087426081366	14.7134603800906	12.4212063519098	33.7780016731421	33.7818259074906	50.7505700178737	55.7266489827036	71.3333340708425	46.5429559841047	1.58197154841651	8.75422111959259	16.3503442179692	11.8452408562072	35.7822977624248	34.1670429802221	64.1830573435174	46.9707015579647	44.2609065150495	56.9837485649793	5.243054596137	4.28827747315795	22.5287655238576	21.1910058597949	83.3934746309709	79.7215515247205	101.208230367158	100.281742680568	56.8024066608201	111.702623343285	10.115988849307	6.56944609317978	9.37986509106192	14.9784445893511	27.2313931176563	41.1413866295034	48.2917533403109	54.6713581594345	67.5696315386042	66.6253937315867	5.85476716114713	1.81623406586705	36.1986306079626	20.7682074500612	71.6163959551821	95.2304057432273	84.6717677060968	83.1682128846093	89.9445280716562
YBR185C	32.47438083952	24.5970707127192	29.4269207601812	23.4622786647185	38.0002518822848	28.5268752107698	29.4206203002166	34.9773647870161	38.1095894351076	33.1538864544308	26.8935163230807	24.5118191348593	26.6768774082655	21.7162749030466	17.8911488812124	37.2731377966059	31.802415800842	32.6185427485866	37.509242809364	33.1944166397938	29.3611057383672	30.0179423121057	40.725076139281	33.5524259446753	36.4247360457114	39.8607757623602	26.7658129896617	44.0426572583578	14.200601665205	26.7114968864377	26.9759702648187	24.8179074631236	24.7287352400723	30.6377275691272	32.6776717411875	33.6611345150482	28.1701894485147	42.9560671252699	32.9607958724899	51.6346801419797	24.3948631714464	30.8759791197399	34.342290576785	27.3762734568989	36.9822372555449	43.1858816742543	42.3358838530484	13.1318230870436	14.5071819470413
YBR186W	8.11859520987999	7.63357366946458	10.7898709453998	5.52053615640436	12.6667506274283	13.5127303629962	27.2140737777004	20.1564475043821	30.2922377561112	31.8787369754142	6.32788619366604	1.75084422391852	7.74489989272224	6.58068936455958	14.0573312638098	9.31828444915147	30.0677385753415	23.4853507789824	27.0066548227421	34.3008971944536	5.243054596137	8.5765549463159	12.1308737436156	9.712544352406	25.8807335061634	14.6156177795321	15.8922014626117	27.7807530398872	7.10030083260252	18.6171038905475	5.0579944246535	2.91975381919101	4.26357504139178	3.40419195212525	14.1603244211813	15.8955357432172	21.127642086386	21.478033562635	26.3686366979919	24.984522649345	4.87897263428927	5.44870219760116	9.28170015588784	7.5520754363859	22.3067462811223	12.1806332927384	20.091605896362	10.2136401788117	13.0564637523372
YBR187W	24.35578562964	12.722622782441	54.9302520856716	51.0649594467403	55.5929610870463	74.3200169964793	72.0805197355308	82.99713678275	83.0593615893372	108.387705716408	14.2377439357486	14.0067537913482	42.16667719371	43.4325498060932	62.6190210842435	71.4401807768279	93.6725701770254	88.0700654211838	102.02514044147	81.3263207674947	23.0694402230028	17.1531098926318	51.122967919523	49.4456803395215	115.984027935029	83.7076291009565	76.9517123452775	101.636901365441	58.8310640415637	72.0400976634229	6.74399256620467	11.679015276764	49.4574704801447	38.1269498638028	56.641297684725	64.5171744871757	88.5348811239034	98.6036995375514	98.8823876174696	103.269360283959	8.78215074172069	16.9515179480925	55.6902009353271	48.1444809069601	101.554397543004	85.2644330491687	81.8015382923308	65.6591154352178	59.4794459828694
YBR188C	23.0026864279933	4.24087426081366	16.675255097436	19.3218765474153	28.1483347276184	21.019802786883	31.6271668227329	26.0848144174357	19.5433791974911	17.2145179667237	9.49182929049907	17.5084422391852	19.792521948068	21.0582059665906	28.1146625276195	34.1670429802221	32.9588672845089	18.9187547941802	25.5062851103675	29.8749749758144	17.8263856268658	12.8648324194739	31.1936753407259	25.6057987472522	28.7563705624038	23.9164654574162	20.0743597422463	21.6825389579608	21.3009024978076	24.2831789876707	13.4879851324093	16.7885844603483	18.7597301821238	19.7443133223264	21.785114494125	20.5706933147517	34.2066586160536	32.2170503439525	20.6004974203062	34.978331709083	9.75794526857855	11.5028157504913	20.4197403429533	22.6562263091577	34.6341586996373	9.96597269405867	32.2900809048674	24.8045547199712	24.6622093099702
YBR189W	60.8894640740999	51.7386659819266	18.6370498147814	5.52053615640436	19.7038343093329	18.0169738173283	27.2140737777004	20.7492841956875	23.4520550369893	23.5902653618065	61.6968903882439	42.0202613740445	7.74489989272224	10.5291029832953	24.2808449102169	26.4018059392625	20.8161267060056	23.4853507789824	23.2557305418057	24.8958124798453	58.7222114767344	34.3062197852636	12.9973647253024	14.1273372398633	14.3781852812019	14.6156177795321	25.0929496778079	15.5843248760343	60.8597214223073	24.2831789876707	42.1499535387792	42.3364303782697	13.6434401324537	13.616767808501	17.4280915953	18.7006302861379	14.0850947242574	36.1221473553406	28.8406963884286	13.3250787463173	39.0317810743142	70.227717213526	8.35353014029906	15.1041508727718	15.2625106133995	16.6099544900978	29.4198514911014	35.0181948987828	31.9158002834909
YBR191W	41.9460752510466	28.8379449735329	7.84717886938166	1.38013403910109	11.9630422592378	19.5183883021057	19.1234031951408	16.0065906652446	20.5205481573657	22.9526906222982	37.9673171619963	24.5118191348593	7.74489989272224	7.23875830101554	15.3352704696106	20.1896163064948	12.1427405785033	16.961642229265	24.7561002541802	18.8101694292165	32.5069384960494	32.1620810486846	3.46596392674732	1.76591715498291	10.544002539548	14.6156177795321	16.7286331185386	15.5843248760343	39.5588189244997	8.90383229547924	35.4059609725745	37.2268611946854	7.67443507450521	6.12754551382544	19.6066030447125	6.54522060014826	7.04254736212868	28.3119533325643	14.8323581426204	23.3188878060553	18.5400960102992	38.1409153832081	0.928170015588784	9.44009429548238	9.97933386260734	16.6099544900978	22.9618353101279	20.4272803576233	24.6622093099702
YBR192W	9.47169441152666	8.48174852162732	11.7707683040725	8.28080423460654	11.2593338910474	11.2606086358302	5.14860855253791	10.6710604434964	9.77168959874555	6.37574739508284	9.49182929049907	7.00337689567408	7.74489989272224	6.58068936455958	2.55587841160177	6.21218963276765	7.51693464383537	13.0474170994346	9.00221827424735	8.29860415994844	11.5347201115014	15.0089711560528	6.06543687180781	9.712544352406	2.87563705624038	10.6295402032961	26.7658129896617	10.1636901365441	12.1719442844615	14.5699073926024	5.0579944246535	8.75926145757304	10.2325800993403	8.85089907552564	15.2495801458875	8.41528362876205	8.04862555671849	7.81019402277635	5.76813927768572	16.6563484328967	8.78215074172069	15.1352838822254	6.49719010912149	7.5520754363859	9.39231422363044	14.3952938914181	10.7633603016225	21.8863718117393	21.760772920562
YBR193C	14.8840912181133	25.4452455648819	24.5224339668177	16.5616084692131	19.7038343093329	21.7705100292717	16.1813411651192	18.9707741217714	16.6118723178674	17.2145179667237	12.6557723873321	19.2592864631037	12.9081664878704	19.0839991572228	11.501452852208	17.083521490111	15.0338692876707	15.6569005193216	12.0029576989965	14.3842472105773	23.0694402230028	25.7296648389477	21.6622745421707	21.1910058597949	15.3367309666153	17.2730028303561	11.710043182977	12.8740075062892	10.1432869037179	7.2849536963012	25.2899721232675	29.1975381919101	17.0543001655671	19.7443133223264	14.1603244211813	24.3108193719793	14.0850947242574	18.5492108040938	11.5362785553714	19.987618119476	21.4674795908728	15.1352838822254	15.7788902650093	19.824198020513	18.7846284472609	13.2879635920782	13.6335897153885	8.75454872469571	10.1550273629289
YBR194W	32.47438083952	20.3561964519056	17.6561524561087	30.362948860224	21.1112510457138	18.0169738173283	16.9168566726246	16.59942735655	15.6347033579929	14.6642190086905	26.8935163230807	33.2660402544519	24.9557885432161	16.4517234113989	14.0573312638098	12.4243792655353	10.9862890948363	16.961642229265	12.7531425551838	12.7245263785876	33.5555494152768	31.0900116803951	16.4633286520498	20.3080472823035	12.461093910375	10.6295402032961	10.0371798711232	16.2619042184706	8.11462952297431	15.3793466921914	26.9759702648187	35.0370458302921	25.5814502483507	30.6377275691272	17.4280915953	11.2203781716827	19.1154856972064	18.5492108040938	15.6563780394327	13.3250787463173	20.4916850640149	31.4813904750289	15.7788902650093	13.2161320136753	7.63125530669973	17.7172847894376	14.35114706883	8.75454872469571	5.80287277881653
YBR195C	16.23719041976	14.4189724867664	18.6370498147814	16.5616084692131	20.4075426775233	24.7733389988264	20.5944342101516	29.0489978739625	33.2237446357349	21.0399664037734	14.2377439357486	14.0067537913482	18.9319775155433	19.7420680936787	34.5043585566239	18.6365688983029	16.1903207713377	20.2234965041237	31.5077639598657	36.5138583037731	17.8263856268658	25.7296648389477	22.5287655238576	21.1910058597949	24.9221878207499	19.9303878811801	161.431309593897	50.8184506827205	71.0030083260252	118.987577039586	10.115988849307	11.679015276764	19.6124451904022	23.8293436648767	22.8743702188313	20.5706933147517	21.127642086386	27.3356790797172	23.0725571107429	53.3003149852693	6.83056168800498	17.5569293033815	22.2760803741308	17.9361791614165	20.5456873641916	125.128323825403	63.8626044562933	119.645499237508	142.170383081005
YBR196C	400.517363687413	486.004190289245	361.951125350229	274.646673781117	212.519927193519	139.631547084294	138.276915411018	89.5183403871089	122.146119984319	66.9453476483698	517.304696332199	416.700925292608	271.932040677803	255.988816281368	161.020339930912	164.623025268343	107.549987981029	89.3748071311273	93.0229221672226	92.3911263140926	408.958258498686	483.503285098559	194.09397989785	237.515857345201	78.6007462039036	174.058720828973	71.096690753789	95.5386872835146	71.0030083260252	99.5610338494497	495.683453616043	406.575719322348	286.512242781528	236.250921477492	197.155286171831	143.994853203262	102.619975848161	74.1968432163753	93.1142483397838	104.934995127249	451.792865935187	360.825167752255	129.015632166841	279.426791146278	86.2918869296047	58.6885058650122	134.900782447002	125.481865053972	140.719664886301
YBR196C-A	1.35309920164667	5.93722396513912	11.7707683040725	11.0410723128087	4.22225020914276	4.50424345433208	12.5037636275921	8.299713678275	9.77168959874555	7.01332213459113	4.74591464524953	7.00337689567408	3.44217773009877	8.55489617392745	5.11175682320355	1.55304740819191	8.67338612750235	11.7426753894912	9.00221827424735	12.7245263785876	1.0486109192274	3.21620810486846	6.06543687180781	6.18071004244018	8.62691116872113	6.64346262706004	4.18215827963465	6.09821408192646	4.05731476148715	4.85663579753413	1.68599814155117	2.18981536439326	6.82172006622685	6.80838390425049	10.8925572470625	7.48025211445516	8.04862555671849	6.83391976992931	9.06421886493471	13.3250787463173	1.95158905371571	4.23787948702312	7.42536012471027	0.944009429548238	11.1533731405612	4.42932119735941	7.17557353441498	0	1.45071819470413
YBR198C	27.0619840329333	16.9634970432546	23.541536608145	24.8424127038196	16.889000836571	25.5240462412151	26.478558270195	13.6352439000232	28.3378998363621	20.4023916642651	25.3115447746642	10.5050653435111	13.7687109203951	15.793654474943	20.4470272928142	26.4018059392625	20.8161267060056	18.9187547941802	27.7568396789293	22.1296110931958	30.4097166575946	22.5134567340792	16.4633286520498	19.425088704812	22.0465507645096	21.2590804065921	23.420086365954	27.1031736974509	13.1862729748332	31.5681326839719	23.6039739817163	20.4382767343371	19.6124451904022	17.7017981510513	21.785114494125	16.8305672575241	16.097251113437	22.454307815482	23.8965770075551	19.987618119476	22.4432741177307	16.9515179480925	19.4915703273645	19.824198020513	25.2418444760068	33.2199089801956	17.221376482596	21.8863718117393	20.3100547258578
YBR199W	50.0646704609266	84.8174852162732	56.892046803017	56.5854956031447	54.8892527188559	53.3002142095962	48.5440234953574	56.9123223653143	56.6757996727242	53.5562781186959	66.4428050334935	80.5388343002519	49.0510326539075	53.3035838529326	53.6734466436373	55.9097066949088	63.0266058598504	59.3657478024276	51.7627550769223	46.4721832957113	54.5277677998248	84.6934800948695	63.2538416631386	50.3286389170129	53.6785583831537	42.5181608131843	71.096690753789	52.1736093675931	84.1892813008584	44.5191614773962	65.7539275204955	87.5926145757304	47.752040463588	58.5521015765542	54.4627862353125	48.6216387439585	47.2856751457211	60.5290036765167	65.0975718481675	73.2879331047453	67.329822353192	55.6978446865896	47.336670795028	47.2004714774119	52.2447478689443	45.400542272934	43.7709985599314	49.6091094399424	47.8737004252364
YBR200W	23.0026864279933	24.5970707127192	27.4651260428358	19.3218765474153	19.0001259411424	15.0141448477736	18.3878876876354	16.59942735655	13.6803654382438	16.5769432272154	37.9673171619963	22.7609749109407	23.2346996781667	19.0839991572228	25.5587841160177	17.083521490111	22.5508039315061	22.8329799240106	11.2527728428092	11.6180458239278	19.9236074653206	19.2972486292108	6.93192785349464	10.5955029298975	3.83418274165383	11.9582327287081	18.4014964303924	8.80853145167156	25.3582172592947	10.5227108946573	21.9179758401652	25.5478459179214	24.7287352400723	22.4676668840266	16.3388358705938	13.0904412002965	12.0729383350777	20.5017593097879	21.4245173171184	8.32817421644833	31.2254248594513	27.8489223432948	11.1380401870654	17.9361791614165	17.0235695303302	12.1806332927384	7.17557353441498	30.640920536435	33.366518478195
YBR201C-A	37.8867776461066	41.5605677559738	70.6246098244349	42.7841552121338	55.5929610870463	41.2888983313774	50.0150545103683	36.7558748609321	53.7442927931005	34.4290359334473	56.9509757429944	59.5287036132296	64.540832439352	60.5423421539481	30.6705409392213	54.3566592867169	45.6798336048457	37.8375095883605	58.5144187826078	42.0462610770721	58.7222114767344	40.7386359950005	58.0548957730176	108.603905031449	69.9738350351825	98.3232468804886	335.409094026699	105.702377420059	274.883075090755	284.113194155747	47.2079479634327	48.9058764714494	53.7210455215365	49.0203641106036	50.1057633364875	36.4662290579689	37.224893199823	42.9560671252699	54.3853131896083	83.2817421644833	71.2330004606234	48.4329084231214	70.5409211847476	91.5689146661791	64.5721602874593	230.324702262689	119.83207802473	379.363778070147	364.130266870737
YBR201W	17.5902896214067	14.4189724867664	18.6370498147814	22.0821446256174	24.6297928866661	25.5240462412151	27.9495892852058	19.5636108130768	23.4520550369893	21.0399664037734	11.0738008389156	14.0067537913482	20.6530663805926	22.3743438395026	28.1146625276195	23.2957111228787	26.5983841243405	24.1377216339541	28.5070245351166	21.023130538536	22.0208293037754	19.2972486292108	16.4633286520498	23.8398815922693	20.1294593936826	17.2730028303561	55.2044892911773	13.5515868487255	49.7021058282176	27.5209361860267	20.231977698614	28.4675997371124	38.372175372526	22.4676668840266	26.14213739295	21.5057248290586	32.194502226874	27.3356790797172	33.7848157693021	34.978331709083	16.5885069565835	18.1623406586705	22.2760803741308	22.6562263091577	19.3716480862378	36.5418998782151	22.9618353101279	87.5454872469571	56.5780095934611
YBR202W	14.8840912181133	12.722622782441	55.9111494443443	59.3457636813469	38.0002518822848	47.2945562704868	29.4206203002166	36.7558748609321	34.2009135956094	24.2278401013148	18.9836585809981	14.0067537913482	49.9115770864322	39.4841361873575	44.727872203031	45.0383748375654	27.176609866174	26.0948341988693	24.0059153979929	28.2152541438247	24.1180511422302	18.2251792609213	55.4554228279571	55.6263903819616	16.2952766520288	30.5599280844762	20.9107913981732	19.6498009306519	21.3009024978076	14.5699073926024	18.5459795570628	23.3580305535281	44.3411804304745	40.850303425503	37.0346946400125	37.4012605722758	24.1458766701555	15.6203880455527	22.2485372139306	16.6563484328967	20.4916850640149	27.2435109880058	48.2648408106168	58.5285846319907	31.6990605047527	22.1466059867971	20.091605896362	8.75454872469571	14.5071819470413
YBR203W	32.47438083952	21.2043713040683	19.6179471734541	16.5616084692131	23.2223761502852	26.2747534836038	19.1234031951408	21.3421208869929	20.5205481573657	29.3284380173811	26.8935163230807	12.2559095674296	29.2585107058396	19.7420680936787	21.7249664986151	12.4243792655353	25.4419326406736	20.8758673590954	24.0059153979929	29.3217346984845	27.2638838999124	32.1620810486846	10.397891780242	18.5421301273205	9.58545685413459	9.30084767788406	17.5650647744655	14.2291661911617	8.11462952297431	12.9510287934243	45.5219498218815	25.5478459179214	23.0233052235156	17.7017981510513	14.1603244211813	19.6356618004448	15.0911729188472	26.3594048268702	24.7205969043674	13.3250787463173	24.3948631714464	28.4543336985838	6.49719010912149	8.49608486593414	16.4365498913533	12.1806332927384	12.1984750085055	8.75454872469571	8.70430916822479
YBR204C	31.1212816378733	41.5605677559738	52.9684573683262	53.8252275249425	43.6299188278085	48.0452635128755	54.4281475554008	51.5767921435661	55.6986307128496	59.9320255137787	37.9673171619963	29.7643518066148	61.9591991417779	54.6197217258445	69.0087171132479	40.3792326129897	61.2919286343499	58.0610060924841	40.5099822341131	54.2175471783298	37.7499930921864	31.0900116803951	51.122967919523	61.8071004244018	76.6836548330767	57.1337785927164	79.4610073130583	53.5287680524656	47.6734484474741	97.9421552502716	42.1499535387792	38.6867381042809	51.1629004967014	57.8712631861292	46.8379961623688	41.1413866295034	68.4133172321072	68.3391976992931	53.561293292796	44.972140768821	44.8865482354613	49.0383197784104	54.7620309197383	49.0884903365084	54.5928264248519	77.5131209537897	58.8397029822029	77.3318470681454	79.7895007087273
YBR207W	138.01611856796	180.661243510662	95.1470437912526	82.8080423460654	85.8524209192361	95.3398197833623	96.3525314832095	101.967910904521	114.328768305323	103.287107800342	181.926728067899	157.575980152667	83.4728099548953	72.3875830101554	88.1778052002612	83.8645600423632	90.7814414678579	88.0700654211838	147.036231812707	116.733698516608	147.854139611063	181.179723240923	80.5836612968752	100.657277834026	130.36221321623	112.938864660021	841.450245862491	175.493049690995	426.018049956151	641.885364574094	178.715803004424	179.564859880247	85.2715008278356	95.3173746595069	94.7652480494438	94.4381829449964	92.5591939022626	98.6036995375514	99.7064075142818	219.863799314236	170.764042200125	176.174704389104	128.087462151252	101.95301839121	134.427497325711	618.997637330978	296.351186971339	818.550305759049	683.288269705646
YBR208C	117.71963054326	80.5766109554595	98.0897358672707	74.5272381114588	159.038091211044	86.3313328746981	133.12830685848	101.967910904521	112.374430385574	99.4616593632923	80.6805489692421	78.7879900763334	86.0544432524694	103.316823023585	111.180710904677	130.455982288121	106.393536497362	98.5079991007315	126.78124069565	101.242970751371	113.249979276559	107.206936828949	128.240665289651	105.072070721483	118.859664991269	151.470947896969	87.8253238723276	125.352178350711	60.8597214223073	101.989351748217	52.2659423880862	94.1620606689101	101.473085985124	83.062283631856	98.0330152235626	111.26875020252	111.674679599469	108.366442066022	101.354447307906	83.2817421644833	80.0151512023441	88.9954692274856	125.302952104486	111.393112686692	138.536634798549	100.767057239927	92.5648985939533	78.7909385222614	76.888064319319
YBR210W	14.8840912181133	25.4452455648819	28.4460234015085	15.181474430112	28.8520430958089	23.2719245140491	15.4458256576137	17.1922640478554	12.7031964783692	22.9526906222982	17.4016870325816	17.5084422391852	25.8163329757408	34.8776536321658	19.1690880870133	9.31828444915147	18.5032237386717	15.0045296643498	21.7553608294311	18.2569291518866	25.1666620614576	18.2251792609213	20.7957835604839	32.6694673671838	23.005096449923	19.9303878811801	9.20074821519622	23.0376976428333	18.2579164266922	14.5699073926024	15.1739832739605	20.4382767343371	28.1395952731858	29.9568891787022	32.6776717411875	23.3757878576724	21.127642086386	19.5254850569409	18.1284377298694	6.66253937315867	19.5158905371571	21.1893974351156	33.4141205611962	35.872358322833	14.0884713354457	15.5026241907579	15.786261775713	7.29545727057976	11.6057455576331
YBR211C	20.2964880247	16.1153221910919	15.6943577387633	13.8013403910109	20.4075426775233	9.00848690866415	12.5037636275921	16.59942735655	13.6803654382438	19.7648169247568	12.6557723873321	14.0067537913482	22.374155245642	22.3743438395026	11.501452852208	21.7426637146868	10.9862890948363	14.3521588093781	17.2542516923074	9.95832499193813	22.0208293037754	16.0810405243423	14.7303466886761	11.4784615073889	14.3781852812019	9.30084767788406	23.420086365954	14.2291661911617	44.6304623763587	33.9964505827389	15.1739832739605	22.6280920987303	22.1705902152373	21.7868284936016	20.6958587694188	14.9605042289103	18.1094075026166	22.454307815482	12.3602984521837	13.3250787463173	12.6853288491521	21.1893974351156	22.2760803741308	12.2721225841271	11.1533731405612	25.4685968848166	16.5038191291545	59.822749618754	31.9158002834909
YBR212W	113.66033293832	112.807255337643	171.657037767724	193.218765474153	161.149216315615	174.164080234174	161.813411651191	163.030090108973	157.324202539803	170.232455448712	102.828150647073	129.56247256997	195.343586183105	196.104543063875	184.023245635328	152.198646002807	183.87578590305	157.873746903159	166.541038073576	174.823927636247	110.104146518877	117.927630511844	143.837502960014	179.240591230765	106.398571080894	132.869252541201	125.464748389039	117.221226241475	146.063331413538	130.319727233833	102.845886634621	102.921322126483	182.481011771568	170.890435996687	184.084217475356	151.475105317717	159.96643293978	143.512315168515	142.555442148519	148.24150105278	95.6278636320697	92.0225260039307	155.932562618916	142.545423861784	96.8582404311889	97.4450663419071	87.5419971198628	134.236413778668	120.409610160443
YBR213W	9.47169441152666	4.24087426081366	8.82807622805436	1.38013403910109	9.85191715466644	11.2606086358302	9.56170159757041	7.11404029566428	2.93150687962367	10.2011958321325	11.0738008389156	12.2559095674296	3.44217773009877	6.58068936455958	6.38969602900444	9.31828444915147	5.20403167650141	11.0903045345194	9.00221827424735	6.08564305062886	6.2916655153644	9.64862431460539	6.93192785349464	7.06366861993164	6.70981979789421	17.2730028303561	8.36431655926929	9.48611079410783	17.2435877363204	10.5227108946573	1.68599814155117	8.75926145757304	4.26357504139178	8.85089907552564	6.5355343482375	4.67515757153447	8.04862555671849	3.90509701138818	9.88823876174696	6.66253937315867	13.66112337601	13.3190498163584	6.49719010912149	13.2161320136753	12.327412418515	13.2879635920782	5.74045882753199	13.1318230870436	18.8593365311537
YBR214W	90.6576465103266	166.242271023895	183.427806071796	197.359167591456	157.630674474663	168.909129537453	123.56660526091	131.609745469789	126.054795823818	123.051924725099	140.795467809069	138.316693689563	217.717741428747	234.930610314777	149.518887078704	135.115124512696	150.338692876707	145.478700658696	133.532904401336	152.694316543051	132.124975822652	118.999699880133	192.360997934476	207.495265710492	123.652393418336	116.924942236257	86.9888922164006	84.0198384620979	77.0889804682559	72.0400976634229	146.681838314952	179.564859880247	208.062462019919	225.357507230691	153.585057183581	176.720956204003	147.893494604702	139.607218157127	111.242686069653	113.263169343697	174.667220307556	112.001100728468	175.42413294628	182.19381990281	84.530828012674	65.3324876610513	74.6259647579158	70.0363897975657	59.4794459828694
YBR215W	18.9433888230533	17.8116718954174	14.7134603800906	16.5616084692131	14.0741673638092	18.767681059717	13.9747946426029	18.3779374304661	16.6118723178674	19.1272421852485	6.32788619366604	7.00337689567408	19.792521948068	11.1871719197513	15.3352704696106	17.083521490111	19.0814494805052	18.2663839392085	16.5040668361201	14.3842472105773	17.8263856268658	10.7206936828949	17.3298196337366	18.5421301273205	12.461093910375	10.6295402032961	8.36431655926929	14.2291661911617	16.2292590459486	12.1415894938353	11.8019869908582	13.1388921863596	17.9070151738455	10.2125758563757	16.3388358705938	16.8305672575241	13.0790165296675	14.6441137927057	19.7764775234939	9.993809059738	6.83056168800498	22.4002201456937	19.4915703273645	9.44009429548238	12.9144320574919	7.75131209537897	13.6335897153885	4.37727436234786	13.0564637523372
YBR216C	17.5902896214067	17.8116718954174	5.88538415203624	16.5616084692131	15.4815841001901	22.5212172716604	16.9168566726246	17.1922640478554	12.7031964783692	16.5769432272154	6.32788619366604	12.2559095674296	11.187077622821	9.87103404683937	17.8911488812124	17.083521490111	13.2991920621703	13.0474170994346	16.5040668361201	16.5972083198969	12.5833310307288	10.7206936828949	19.0628015971103	15.8932543948462	20.1294593936826	14.6156177795321	14.2193381507578	19.6498009306519	14.200601665205	14.5699073926024	21.9179758401652	10.2191383671685	17.9070151738455	17.0209597606262	26.14213739295	22.4407563433655	15.0911729188472	15.6203880455527	26.3686366979919	9.993809059738	8.78215074172069	11.5028157504913	12.0662102026542	15.1041508727718	19.9586677252147	12.1806332927384	15.786261775713	16.0500059952755	18.8593365311537
YBR217W	18.9433888230533	10.1780982259528	31.3887154775266	35.8834850166283	23.9260845184756	35.2832403922679	32.3626823302383	20.1564475043821	30.2922377561112	29.9660127568894	15.8197154841651	29.7643518066148	30.1190551383643	25.0066195853264	16.6132096754115	12.4243792655353	17.9249979968382	35.2280261684735	28.5070245351166	23.7893319251855	22.0208293037754	20.3693179975003	30.327184359039	24.7228401697607	14.3781852812019	26.5738505082402	39.3122878285657	45.3978159432303	31.4441894015254	38.853086380273	11.8019869908582	22.6280920987303	25.5814502483507	28.5952123978521	22.8743702188313	29.9210084578206	23.1397984755657	35.1458731024936	28.0166764916164	24.984522649345	18.5400960102992	20.5839860798266	25.0605904208972	40.5924054705742	29.938001587822	40.9712210755746	35.8778676720749	49.6091094399424	37.7186730623074
YBR218C	67.6549600823333	58.5240647992285	62.7774309550532	52.4450934858414	75.2967953963792	57.8044576639283	56.634694077917	48.6126086870393	65.4703203115952	51.0059791606627	58.5329472914109	43.771105597963	69.7040990345002	65.1488247091398	58.7852034668408	76.0993230014037	67.0741860526849	61.9752312223145	72.0177461939788	55.3240277329896	48.2361022844604	46.098982836448	51.9894589012098	67.1048518893506	59.4298324956344	51.8190084910683	116.264000173843	50.8184506827205	117.662128083127	94.7043980519155	60.695933095842	73.723783934573	53.7210455215365	47.6586873297535	55.5520419600188	48.6216387439585	59.3586134807989	60.5290036765167	57.6813927768572	54.965949828559	46.838137289177	46.0112630019653	45.4803307638504	62.3046223501837	45.7875318401984	89.6937542465281	54.5343588615539	126.940956508088	98.648837239881
YBR221C	271.97293953098	209.499188484195	276.613055145703	293.968550328532	358.891267777135	344.574624256404	345.692288527545	343.845280957107	285.33333628337	321.337668712175	251.533476198225	278.384231603044	279.676940570525	298.763297151005	348.877403183642	341.670429802221	336.527381747091	331.40439432564	314.32745474247	319.21964001935	230.694402230028	288.386660069872	341.397446784611	321.396922206889	464.894657425527	474.343231572087	286.05962632701	477.693436417573	186.636479028409	372.34207781095	215.807762118549	206.572582707764	280.543237723579	273.69703295087	364.900667776594	358.117069979541	373.25501019282	324.123051945219	348.56041635158	288.154827889112	210.771617801297	248.824067023786	368.483496188747	334.179338060076	517.751321577628	437.395468239242	432.687084125223	194.059163397422	287.242202551418
YBR221W-A	9.47169441152666	5.08904911297639	4.90448679336354	4.14040211730327	0.70370836819046	3.00282896955472	2.20654652251625	1.77851007391607	1.95433791974911	3.18787369754142	3.16394309683302	1.75084422391852	5.16326659514816	2.63227574582383	3.83381761740266	0	1.15645148366698	1.9571125649152	1.50036971237456	0.553240277329896	6.2916655153644	2.14413873657898	0.86649098168683	1.76591715498291	1.91709137082692	0	3.34572662370772	3.38789671218137	1.01432869037179	1.61887859917804	5.0579944246535	5.83950763838202	1.70543001655671	2.7233535617002	1.08925572470625	1.87006302861379	3.01823458376943	0.976274252847044	1.64803979362449	0	6.83056168800498	5.44870219760116	3.71268006235514	3.77603771819295	2.34807855590761	2.21466059867971	0.717557353441498	1.45909145411595	1.45071819470413
YBR222C	253.029550707926	259.541504761796	146.153706442233	160.095548535726	106.259963596759	97.5919415105283	108.856295110802	90.7040137697196	86.9680374288354	88.6228887916515	265.771220133974	253.872412468185	135.105475906377	140.826752401575	136.739495020695	83.8645600423632	98.2983761116933	88.0700654211838	83.270519036788	86.3054832634638	267.395784402987	187.61213945066	136.905575106519	135.975620933684	90.1032944288651	70.4207038468364	52.6951943233965	97.5714253108234	72.017337016397	43.7097221778072	303.47966547921	310.223843289045	138.139831341094	150.465284283936	100.211526672975	110.333718688214	90.547037513083	71.2680204578342	85.6980692684736	84.947377007773	246.876015295037	200.996569955954	162.429752728037	155.761555875459	110.946711766635	71.9764694570904	89.6946691801873	55.4454752564062	66.7330369563901
YBR223C	10.8247936131733	12.722622782441	8.82807622805436	5.52053615640436	8.44450041828552	10.5099013934415	10.2972171050758	8.299713678275	10.7488585586201	10.2011958321325	18.9836585809981	3.50168844783704	6.88435546019755	7.89682723747149	11.501452852208	7.76523704095956	6.93870890200188	11.0903045345194	6.00147884949823	6.08564305062886	6.2916655153644	10.7206936828949	6.93192785349464	8.82958577491455	8.62691116872113	10.6295402032961	5.01858993556158	5.42063473949019	14.200601665205	9.71327159506826	5.0579944246535	7.29938454797753	3.41086003311343	10.2125758563757	7.62479007294375	6.54522060014826	12.0729383350777	5.85764551708226	7.41617907131022	3.33126968657933	14.6369179028678	5.44870219760116	5.56902009353271	5.66405657728943	5.28317675079212	7.75131209537897	2.87022941376599	11.6727316329276	5.80287277881653
YBR225W	13.5309920164667	11.0262730781155	31.3887154775266	31.7430828993251	33.0742933049516	25.5240462412151	29.4206203002166	25.4919777261304	28.3378998363621	33.1538864544308	17.4016870325816	17.5084422391852	31.8401440034137	33.5615157592538	26.8367233218186	23.2957111228787	35.8499959936764	31.3138010386431	31.5077639598657	32.6411763624639	17.8263856268658	10.7206936828949	27.7277114139786	30.0205916347095	23.9636421353365	22.5877729320041	16.7286331185386	24.3928563277059	25.3582172592947	25.9020575868487	20.231977698614	10.9490768219663	32.4031703145775	43.5736569872032	15.2495801458875	28.9859769435137	34.2066586160536	25.3831305740231	37.0808953565511	16.6563484328967	16.5885069565835	14.5298725269364	14.8507202494205	21.7122168796095	31.6990605047527	19.9319453881173	15.786261775713	13.1318230870436	18.8593365311537
YBR228W	9.47169441152666	6.78539881730185	10.7898709453998	8.28080423460654	7.0370836819046	4.50424345433208	8.09067058255958	11.8567338261071	10.7488585586201	6.37574739508284	12.6557723873321	8.75422111959259	5.16326659514816	8.55489617392745	12.7793920580089	9.31828444915147	6.36048316016839	7.17607940468905	2.25055456856184	5.53240277329896	8.3888873538192	12.8648324194739	7.79841883518147	11.4784615073889	7.66836548330767	11.9582327287081	10.0371798711232	8.13095210923528	13.1862729748332	4.04719649794511	8.42999070775583	6.56944609317978	9.37986509106192	10.2125758563757	6.5355343482375	5.61018908584137	3.01823458376943	6.83391976992931	13.1843183489959	11.6594439030277	12.6853288491521	12.1082271057804	5.56902009353271	8.49608486593414	7.63125530669973	5.53665149669926	5.74045882753199	1.45909145411595	5.80287277881653
YBR229C	10.8247936131733	13.5707976346037	26.4842286841631	12.4212063519098	25.3335012548566	20.2690955444943	20.5944342101516	27.2704878000464	18.5662102376165	25.5029895803314	7.90985774208256	10.5050653435111	22.374155245642	24.3485506488704	23.002905704416	32.6139955720301	30.645964317175	28.7043176187562	18.754621404682	23.2360916478556	7.3402764345918	13.9369017877633	19.0628015971103	15.0102958173547	18.2123680228557	17.2730028303561	7.52788490334236	13.5515868487255	12.1719442844615	13.7604680930134	10.115988849307	16.0586460055506	25.5814502483507	14.297606198926	25.0528816682438	24.3108193719793	21.127642086386	18.5492108040938	25.5446168011796	14.990713589607	11.7095343222943	10.2919930399133	17.6352302961869	21.7122168796095	18.7846284472609	17.7172847894376	17.221376482596	13.1318230870436	4.3521545841124
YBR230C	581.832656708066	776.079989728899	826.896473361092	739.751844958184	657.263615889889	659.871666059649	741.399631565459	708.439846109902	627.342472239464	653.514107995991	689.739595109599	770.371458524148	817.517210898459	758.095414797263	720.7577120717	760.993230014037	703.122502069524	692.165477125008	675.166370568551	617.416149500164	655.381824517125	783.682708219615	801.504158060318	798.194554052275	875.152210782488	814.488518077561	595.539339019974	880.853145167156	482.820456616971	558.513116716425	676.085254762018	862.787253570944	788.76138265748	818.367745290909	648.107156200219	648.911870928985	767.637662472026	721.466672853966	762.218404551328	641.269414666522	754.289169261122	613.887114263064	839.065694092261	774.087732229555	940.992481279975	707.584061278166	771.374154949611	421.67743023951	425.060431048311
YBR230W-A	97.4231425185599	140.797025459013	78.4717886938166	74.5272381114588	95.0006297057121	70.5664807845359	78.7001593030795	87.1469936218875	89.8995443084591	76.5089687409941	128.139695421737	127.811628346052	80.0306322247965	92.78772004029	69.0087171132479	74.5462755932117	68.2306375363518	71.7607940468905	85.5210736053499	66.3888332795875	97.5208154881482	142.585225982502	75.3847154067542	99.7743192565344	106.398571080894	99.6519394059006	94.516777119743	145.001979281363	104.475855108294	94.7043980519155	187.145793712179	175.185229151461	80.1552107781655	77.6155765084556	89.3189694259126	99.1133405165308	99.6017412643913	66.386649193599	91.4662085461593	128.253882933304	172.71563125384	103.525341754422	95.6015116056448	105.729056109403	117.403927795381	117.377011730024	139.206126567651	100.677310334001	114.606737381626
YBR231C	50.0646704609266	41.5605677559738	64.7392256723987	46.9245573294371	54.8892527188559	61.5579938758717	74.287066258047	74.1045864131696	87.9452063887099	78.4216929595189	33.2214025167467	45.5219498218815	61.9591991417779	58.5681353445802	72.8425347306506	54.3566592867169	73.4346692128532	69.1513106270036	90.0221827424735	66.3888332795875	46.1388804460056	30.0179423121057	54.5889318462703	52.9775146494873	92.9789314851055	87.6937066771926	71.9331224097159	82.6646797772254	68.9743509452816	58.2796295704096	32.0339646894722	48.9058764714494	56.2791905463715	75.5730613371805	30.499160291775	67.3222690300964	65.3950826483377	76.1493917220694	82.4019896812246	93.2755512242213	40.007575601172	36.3246813173411	60.331051013271	56.6405657728943	69.8553370382514	80.8351118518093	68.8855059303838	75.8727556140295	92.8459644610644
YBR233W	18.9433888230533	8.48174852162732	26.4842286841631	28.9828148211229	33.0742933049516	47.2945562704868	36.0402598677654	44.4627518479018	39.0867583949822	38.254484370497	12.6557723873321	21.0101306870222	24.0952441106914	33.5615157592538	46.0058114088319	46.5914222457573	27.176609866174	38.4898804433322	41.2601670903004	40.3865402450824	18.8749965460932	3.21620810486846	48.5234949744625	35.3183430996582	45.0516472144326	45.1755458640083	168.122762841313	58.9494027919558	83.1749526104866	165.935056415749	16.8599814155117	13.1388921863596	41.7830354056395	29.9568891787022	35.9454389153063	48.6216387439585	44.2674405619517	32.2170503439525	30.4887361820531	48.3034104554003	7.80635621486284	9.68658168462428	48.2648408106168	35.872358322833	52.2447478689443	132.879635920782	73.1908500510328	186.763706126842	182.790492532721
YBR233W-A	20.2964880247	16.9634970432546	24.5224339668177	27.6026807820218	47.1484606687608	48.7959707552642	27.2140737777004	37.3487115522375	23.4520550369893	21.6775411432817	25.3115447746642	31.5151960305333	24.9557885432161	21.7162749030466	30.6705409392213	41.9322800211816	38.1628989610103	31.3138010386431	31.5077639598657	27.1087735891649	31.458327576822	18.2251792609213	35.52613024916	39.7331359871155	31.6320076186441	46.5042383894203	151.394129722774	36.5892844915588	95.3468968949481	129.510287934243	30.347966547921	16.7885844603483	24.7287352400723	27.233535617002	39.213206089425	32.7261030007413	23.1397984755657	24.4068563211761	24.7205969043674	38.3096013956623	25.3706576983042	22.4002201456937	35.2704605923738	39.648396041026	51.6577282299674	99.6597269405868	55.2519162149954	185.304614672726	113.156019186922
YBR234C	87.9514481070332	96.6919331465514	115.745888323379	100.74978485438	94.2969213375216	81.0763821779774	120.624543230888	97.2252173740786	80.1278547097135	91.8107624891929	112.319979937572	105.050653435111	74.0068211971236	96.0780647225698	88.1778052002612	104.054176348858	79.2169266311881	92.6366614059859	96.0236615919718	89.0716846501133	83.888873538192	88.9817575680275	109.177863692541	101.540236411517	109.274208137134	96.9945543550766	72.7695540656428	88.0853145167156	49.7021058282176	55.8513116716425	77.5559145113537	107.30095285527	87.8296458526707	113.019172810558	74.069389280025	81.3477417446998	87.5288029293136	96.6511510318574	90.6421886493471	64.959758888297	102.458425320075	83.5467670298844	91.8888315432897	100.064999532113	102.728436820958	88.5864239471882	99.0229147749267	67.1182068893338	63.8316005669818
YBR235W	35.1805792428133	39.8642180516484	60.8156362377078	63.4861657986501	60.5189196643795	73.5693097540906	61.0477871229495	71.1404029566428	66.4474892714697	69.495646606403	41.1312602588293	64.7812362849852	58.5170214116792	61.2004110904041	53.6734466436373	76.0993230014037	68.8088632781853	56.7562643825407	66.7664522006679	74.1341971622061	52.43054596137	36.4503585218426	71.05226049832	70.6366861993164	69.015289349769	81.0502440501325	95.3532087756699	86.0525764894067	47.6734484474741	94.7043980519155	25.2899721232675	40.8765534686742	60.5427655877633	68.76467743293	65.355343482375	57.9719538870275	78.4740991780053	79.0782144806106	65.0975718481675	81.6161073211937	37.0801920205985	46.0112630019653	72.3972612159252	69.8566977865696	62.2240817315517	117.377011730024	71.7557353441498	84.6273043387252	87.0430916822479
YBR236C	23.0026864279933	35.6233437908347	26.4842286841631	31.7430828993251	35.8891267777135	31.5297041803245	29.4206203002166	33.1988547131	36.1552515153585	32.5163117149225	41.1312602588293	33.2660402544519	30.1190551383643	27.6388953311502	42.1719937914293	32.6139955720301	36.4282217355099	33.9232844585301	36.0088730969894	29.8749749758144	41.944436769096	32.1620810486846	26.8612204322917	32.6694673671838	41.2174644727787	33.2173131353002	33.4572662370772	36.5892844915588	17.2435877363204	32.3775719835609	28.6619684063698	26.2777843727191	23.0233052235156	30.6377275691272	37.0346946400125	19.6356618004448	29.1762676431045	26.3594048268702	33.7848157693021	31.6470620225037	39.0317810743142	33.297624540896	35.2704605923738	28.3202828864471	32.8730997827065	31.0052483815159	31.5725235514259	30.640920536435	34.8172366728992
YBR237W	13.5309920164667	11.8744479302782	30.4078181188539	17.9417425083142	23.2223761502852	21.7705100292717	31.6271668227329	33.1988547131	30.2922377561112	27.4157137988562	14.2377439357486	15.7575980152667	24.9557885432161	21.0582059665906	23.002905704416	18.6365688983029	25.4419326406736	29.3566884737279	36.0088730969894	29.3217346984845	23.0694402230028	21.4413873657898	19.0628015971103	18.5421301273205	38.3418274165384	25.2451579828282	34.2936978930041	41.3323398886127	19.272245117064	33.9964505827389	11.8019869908582	13.8688306411573	24.7287352400723	18.3826365414763	25.0528816682438	37.4012605722758	28.1701894485147	26.3594048268702	39.5529550469878	33.3126968657933	10.7337397954364	23.0056315009827	30.6296105144299	18.8801885909648	27.0029033929375	42.0785513749144	24.3969500170109	23.3454632658552	18.8593365311537
YBR239C	29.7681824362266	27.9897701213701	12.7516656627452	15.181474430112	19.0001259411424	18.0169738173283	11.7682481200867	17.7851007391607	18.5662102376165	15.3017937481988	22.1476016778312	17.5084422391852	16.3503442179692	13.1613787291192	19.1690880870133	10.8713318573434	14.4556435458373	16.3092713742933	6.00147884949823	19.3634097065464	23.0694402230028	28.9458729438162	14.7303466886761	8.82958577491455	10.544002539548	14.6156177795321	8.36431655926929	9.48611079410783	5.07164345185894	4.85663579753413	25.2899721232675	23.3580305535281	17.9070151738455	12.9359294180759	26.14213739295	15.8955357432172	13.0790165296675	16.5966622983997	14.8323581426204	14.990713589607	21.4674795908728	39.3517380937862	7.42536012471027	12.2721225841271	8.80529458465354	5.53665149669926	6.45801618097348	5.83636581646381	7.25359097352066
YBR240C	6.76549600823333	6.78539881730185	8.82807622805436	0	7.74079205009506	8.25777966627547	13.2392791350975	9.48538706088571	10.7488585586201	8.92604635311598	9.49182929049907	5.25253267175556	7.74489989272224	12.5033097926632	5.11175682320355	12.4243792655353	10.9862890948363	5.21896683977386	9.00221827424735	7.19212360528865	3.1458327576822	6.43241620973693	12.1308737436156	6.18071004244018	9.58545685413459	3.98607757623602	3.34572662370772	4.74305539705392	3.04298607111536	2.42831789876707	10.115988849307	6.56944609317978	5.9690050579485	10.8934142468008	6.5355343482375	5.61018908584137	9.0547037513083	4.88137126423522	7.41617907131022	8.32817421644833	1.95158905371571	2.42164542115607	7.42536012471027	6.60806600683766	9.97933386260734	5.53665149669926	7.89313088785648	4.37727436234786	4.3521545841124
YBR241C	238.145459489813	262.086029318284	486.525089901663	498.228388115493	314.557640581136	349.829574953125	230.951869356701	209.864188722096	210.091326373029	204.661491382159	232.549817617227	266.128322035615	465.554537995859	459.990186582715	323.318619067624	318.374718679342	235.916102668064	230.939282659993	174.042886635449	214.10398732667	285.222170029853	233.711122287108	439.310927715223	543.902483734736	240.594967038778	284.34020043817	139.684086539797	214.792651552299	192.72245117064	201.550385597666	237.725737958714	264.237720636787	492.016559776612	433.694054700756	407.381641040138	338.481408179096	264.59856517712	198.18367332795	184.580456885943	184.885467605153	266.391905832194	234.29419449685	465.013177809981	492.77292222418	251.831425121091	159.455563104939	193.740485429205	164.877334315103	158.12828322275
YBR242W	41.9460752510466	50.0423162776012	32.3696128361993	17.9417425083142	49.2595857733322	44.2917273009321	56.634694077917	42.6842417739857	38.1095894351076	43.9926570260716	37.9673171619963	42.0202613740445	44.7483104912841	42.7744808696373	48.5616898204337	41.9322800211816	51.4620910231806	46.318330702993	36.7590579531767	33.7476569171237	42.9930476883234	58.9638152559218	38.1256031942205	30.0205916347095	50.8029213269133	53.1477010164803	20.9107913981732	47.4305539705392	36.5158328533844	33.1870112831499	20.231977698614	57.6651379290225	30.6977402980208	32.6802427404024	44.6594847129563	55.1668593441068	38.2309713944128	42.9560671252699	35.4328555629266	24.984522649345	38.0559865474563	44.1950289360983	46.4085007794392	44.3684431887672	48.135610396106	33.2199089801956	35.8778676720749	29.181829082319	30.4650820887868
YBR243C	13.5309920164667	14.4189724867664	47.0830732162899	67.6265679159534	63.3337531371414	99.0933559953057	58.1057250929279	72.9189130305589	64.4931513517206	63.7574739508284	20.5656301294146	12.2559095674296	38.7244994636112	42.1164119331813	70.2866563190488	66.7810385522522	62.4483801180169	56.7562643825407	54.0133096454841	46.4721832957113	5.243054596137	10.7206936828949	52.8559498828966	35.3183430996582	42.1760101581922	61.1198561689524	50.1858993556158	39.2996018613039	67.9600222549098	52.6135544732864	10.115988849307	16.0586460055506	44.3411804304745	44.2544953776282	53.3735305106063	69.1923320587102	84.5105683455442	68.3391976992931	73.3377708162899	64.959758888297	12.6853288491521	12.7136384610694	54.7620309197383	26.4322640273507	52.2447478689443	47.6152028716137	33.0076382583089	93.3818530634209	49.3244186199405
YBR244W	6.76549600823333	10.1780982259528	4.90448679336354	12.4212063519098	7.0370836819046	8.25777966627547	5.88412406004333	8.89255036958036	5.86301375924733	9.56362109262426	12.6557723873321	19.2592864631037	9.46598875777163	11.1871719197513	2.55587841160177	1.55304740819191	13.8774178040038	5.21896683977386	10.5025879866219	10.511565269268	8.3888873538192	7.50448557802641	7.79841883518147	14.1273372398633	14.3781852812019	6.64346262706004	17.5650647744655	9.48611079410783	15.2149303555768	18.6171038905475	13.4879851324093	10.9490768219663	11.938010115897	5.44670712340039	9.80330152235626	8.41528362876205	8.04862555671849	6.83391976992931	10.7122586585592	11.6594439030277	3.90317810743142	15.1352838822254	3.71268006235514	11.3281131545789	14.0884713354457	13.2879635920782	13.6335897153885	18.9681889035074	13.0564637523372
YBR245C	18.9433888230533	12.722622782441	27.4651260428358	28.9828148211229	26.037209623047	30.7789969379359	22.0654652251625	25.4919777261304	25.4063929567384	28.6908632778728	9.49182929049907	3.50168844783704	22.374155245642	26.9808263946943	25.5587841160177	32.6139955720301	29.489512833508	28.0519467637845	24.7561002541802	34.8541374717835	14.6805528691836	10.7206936828949	27.7277114139786	31.7865087896924	23.005096449923	27.9025430336522	27.6022446455887	21.0049596155245	13.1862729748332	19.4265431901365	11.8019869908582	10.9490768219663	28.1395952731858	32.6802427404024	37.0346946400125	21.5057248290586	16.097251113437	29.2882275854113	25.5446168011796	21.6532529627657	20.4916850640149	18.7677520139595	23.2042503897196	27.3762734568989	32.2860801437296	22.1466059867971	19.3740485429205	18.9681889035074	27.5636456993785
YBR246W	20.2964880247	22.052546156231	32.3696128361993	28.9828148211229	28.1483347276184	28.5268752107698	28.6851047927112	23.7134676522143	13.6803654382438	24.2278401013148	22.1476016778312	24.5118191348593	18.9319775155433	21.0582059665906	25.5587841160177	20.1896163064948	24.8637068988401	30.6614301836714	22.5055456856184	23.2360916478556	32.5069384960494	33.2341504169741	33.7931482857864	30.9035502122009	26.8392791915768	22.5877729320041	8.36431655926929	14.2291661911617	8.11462952297431	8.90383229547924	21.9179758401652	23.3580305535281	14.4961551407321	30.6377275691272	30.499160291775	24.3108193719793	35.2127368106434	24.4068563211761	22.2485372139306	13.3250787463173	20.4916850640149	26.6380996327168	20.4197403429533	31.1523111750918	19.3716480862378	11.0733029933985	17.9389338360375	4.37727436234786	10.1550273629289
YBR247C	31.1212816378733	29.6861198256956	6.86628151070895	6.90067019550545	4.92595857733322	6.00565793910943	6.61963956754874	6.52120360435893	5.86301375924733	7.01332213459113	22.1476016778312	28.0135075826963	4.30272216262347	5.92262042810362	6.38969602900444	7.76523704095956	9.82983761116933	5.21896683977386	6.75166370568551	6.63888332795875	35.6527712537316	37.5224278901321	3.46596392674732	5.29775146494873	6.70981979789421	17.2730028303561	7.52788490334236	7.45337276679901	17.2435877363204	5.66607509712315	40.463955397228	30.6574151015056	8.52715008278356	6.12754551382544	8.71404579765001	8.41528362876205	8.04862555671849	2.92882275854113	7.41617907131022	9.993809059738	21.4674795908728	36.3246813173411	6.49719010912149	7.5520754363859	7.63125530669973	4.42932119735941	11.480917655064	5.83636581646381	1.45071819470413
YBR248C	69.0080592839799	73.7912121381576	11.7707683040725	4.14040211730327	15.4815841001901	12.7620231206075	16.9168566726246	16.59942735655	19.5433791974911	12.7514947901657	52.2050610977449	63.0303920610667	5.16326659514816	14.4775166020311	14.0573312638098	21.7426637146868	17.3467722550047	22.8329799240106	18.0044365484947	11.6180458239278	75.4999861843728	61.1079539925008	11.2643827619288	4.41479288745727	14.3781852812019	10.6295402032961	15.0557698066847	8.80853145167156	48.6877771378458	10.5227108946573	64.0679293789443	35.7669842850899	12.7907251241753	12.2550910276509	13.071068696475	8.41528362876205	13.0790165296675	17.5729365512468	18.1284377298694	19.987618119476	52.6929044503241	85.3630010957515	5.56902009353271	13.2161320136753	11.1533731405612	15.5026241907579	23.6793926635694	27.7227376282031	24.6622093099702
YBR249C	32.47438083952	19.5080215997428	19.6179471734541	8.28080423460654	60.5189196643795	33.7818259074906	55.8991785704116	43.8699151565964	51.7899548733514	48.4556802026296	23.7295732262477	47.2727940458	19.792521948068	19.0839991572228	35.7822977624248	46.5914222457573	43.3669306375118	39.7946221532757	46.5114610836113	45.9189430183814	44.0416586075508	23.5855261023687	23.3952565055444	9.712544352406	48.8858299560864	31.8886206098882	44.3308777641272	48.7857126554117	121.719442844615	35.615329181917	13.4879851324093	16.7885844603483	14.4961551407321	31.9994043499773	23.9636259435375	40.2063551151965	26.1580330593351	62.4815521822108	44.4970744278613	24.984522649345	17.5643014834414	28.4543336985838	27.8451004676635	35.872358322833	50.4836889520136	36.5418998782151	67.4503912235008	62.7409325269859	53.6765732040529
YBR250W	4.05929760494	1.69634970432546	6.86628151070895	2.76026807820218	6.33337531371414	5.25495069672075	22.0654652251625	22.5277942696036	109.44292350595	70.7707960854195	3.16394309683302	21.0101306870222	12.9081664878704	5.92262042810362	6.38969602900444	10.8713318573434	27.7548356080075	22.1806090690389	93.0229221672226	69.7082749435669	6.2916655153644	6.43241620973693	8.6649098168683	6.18071004244018	58.471286810221	19.9303878811801	460.873842415738	174.815470348559	135.92004450982	398.244135397799	6.74399256620467	7.29938454797753	5.11629004967014	4.0850303425503	7.62479007294375	18.7006302861379	17.1033293080268	26.3594048268702	45.3210943246735	141.578961679622	3.90317810743142	4.84329084231214	8.35353014029906	4.72004714774119	50.4836889520136	420.785513749144	232.488582515045	364.772863528988	335.115902976654
YBR251W	27.0619840329333	28.8379449735329	20.5988445321268	13.8013403910109	15.4815841001901	17.2662665749396	15.4458256576137	21.3421208869929	19.5433791974911	15.3017937481988	33.2214025167467	19.2592864631037	16.3503442179692	19.0839991572228	23.002905704416	17.083521490111	16.7685465131712	22.1806090690389	18.0044365484947	16.043968042567	29.3611057383672	31.0900116803951	19.0628015971103	14.1273372398633	26.8392791915768	22.5877729320041	16.7286331185386	18.9722215882157	17.2435877363204	14.5699073926024	25.2899721232675	24.0879690083258	15.3488701490104	12.2550910276509	8.71404579765001	21.5057248290586	22.1337202809759	17.5729365512468	18.1284377298694	21.6532529627657	30.2496303325935	32.0868018303179	18.5634003117757	16.9921697318683	21.7197266421454	26.5759271841565	20.8091632498034	13.1318230870436	17.4086183364496
YBR252W	12.17789281482	8.48174852162732	63.758328313726	63.4861657986501	66.8522949780937	92.3369908138076	58.1057250929279	48.0197719957339	52.767123833226	47.8181054631213	6.32788619366604	21.0101306870222	57.6564769791545	42.7744808696373	76.6763523480532	105.60722375705	49.1491880558467	33.2709136035583	48.0118307959859	35.4073777491133	20.972218384548	7.50448557802641	77.1176973701278	60.0411832694189	41.2174644727787	89.0223992026046	26.7658129896617	54.2063473949019	19.272245117064	16.9982252913695	10.115988849307	8.02932300277528	46.0466104470312	64.6796470903797	88.2297137012063	79.477678716086	55.3343007024396	53.6950839065874	40.3769749438001	33.3126968657933	15.6127124297257	14.5298725269364	98.3860216524111	101.009008961661	69.8553370382514	31.0052483815159	27.9847367842184	21.8863718117393	27.5636456993785
YBR253W	14.8840912181133	24.5970707127192	27.4651260428358	22.0821446256174	39.4076686186658	21.7705100292717	38.2468063902816	30.2346712565732	36.1552515153585	36.3417601519722	20.5656301294146	17.5084422391852	37.8639550310865	24.3485506488704	39.6161153798275	26.4018059392625	35.2717702518429	36.532767878417	34.5085033846149	26.555533311835	35.6527712537316	24.6575954706582	43.3245490843415	31.7865087896924	36.4247360457114	34.5460056607122	51.0223310115427	42.009919231049	31.4441894015254	46.9474793761633	30.347966547921	20.4382767343371	30.6977402980208	27.233535617002	30.499160291775	31.7910714864344	32.194502226874	38.0746958610347	33.7848157693021	29.981427179214	27.3222467520199	23.6110428562717	38.0549706391402	40.5924054705742	41.0913747283832	48.7225331709535	34.4427529651919	52.5272923481743	58.0287277881653
YBR254C	6.76549600823333	5.08904911297639	4.90448679336354	2.76026807820218	7.0370836819046	5.25495069672075	4.41309304503249	5.92836691305357	3.90867583949822	3.18787369754142	7.90985774208256	5.25253267175556	1.72108886504939	2.63227574582383	10.2235136464071	3.10609481638382	2.89112870916745	5.21896683977386	6.00147884949823	4.97916249596906	3.1458327576822	9.64862431460539	3.46596392674732	1.76591715498291	0	2.65738505082402	0.836431655926929	3.38789671218137	7.10030083260252	0	6.74399256620467	5.83950763838202	5.9690050579485	1.3616767808501	5.44627862353125	10.2853466573758	7.04254736212868	5.85764551708226	1.64803979362449	4.996904529869	1.95158905371571	3.02705677644509	7.42536012471027	5.66405657728943	8.21827494567664	1.10733029933985	1.435114706883	2.9181829082319	4.3521545841124
YBR255C-A	94.7169441152666	122.137178711433	98.0897358672707	136.633269871008	102.037713387617	87.0820401170868	83.8487678556174	78.8472799436125	114.328768305323	75.8713940014858	98.0822360018237	129.56247256997	129.081664878704	105.291029832953	99.6792580524692	99.3950341242823	97.1419246280263	76.9797608866644	107.276434434781	85.7522429861339	89.131928134329	134.008671036186	114.376809582662	107.720946453957	140.906215755778	108.952787083785	357.156317080799	155.165669417907	152.149303555768	409.576285592045	136.565849465645	164.236152329494	101.473085985124	114.380849591408	92.5867366000313	86.9579308305412	103.626054042751	92.7460540204692	106.29856668878	163.232214642387	113.192165115511	81.1251216087284	129.94380218243	128.38528241856	133.840477686734	397.531577463007	249.709958997641	388.118326794843	359.778112286625
YBR255W	28.41508323458	33.0788192343465	23.541536608145	26.2225467429207	14.7778757319997	18.0169738173283	19.8589187026462	19.5636108130768	16.6118723178674	18.4896674457402	26.8935163230807	22.7609749109407	30.1190551383643	19.0839991572228	12.7793920580089	17.083521490111	19.0814494805052	19.571125649152	19.5048062608693	14.9374874879072	24.1180511422302	24.6575954706582	19.9292925787971	24.7228401697607	18.2123680228557	22.5877729320041	23.420086365954	29.1359117247598	29.4155320207819	29.1398147852048	20.231977698614	27.0077228275169	23.0233052235156	27.233535617002	22.8743702188313	17.765598771831	19.1154856972064	12.6915652870116	15.6563780394327	19.987618119476	18.5400960102992	27.8489223432948	22.2760803741308	19.824198020513	28.1769426708913	31.0052483815159	30.1374088445429	37.9363778070148	26.1129275046744
YBR256C	55.4770672675133	60.2204145035539	103.975120019307	120.071661401795	121.74154769695	108.10184290397	110.327326125812	92.4825238436357	91.8538822282082	100.099234102801	47.4591464524953	49.0236382697185	105.846965200537	115.162063879793	94.5675012292656	142.880361553656	107.549987981029	93.2890322609577	74.2683007625407	91.8378860367627	65.0138769920988	37.5224278901321	119.575755472783	117.433490806363	94.8960228559324	114.267557185433	104.553956990866	113.833329529294	72.017337016397	119.797016339175	48.8939461049838	56.9351994742247	104.031231009959	113.700011200983	128.532175515338	93.5031514306895	89.5409593184932	92.7460540204692	109.594646276029	78.2848376346143	46.838137289177	39.3517380937862	108.595891823888	97.2329712434685	112.120751044588	104.089048137946	119.83207802473	74.4136641599136	111.705300992218
YBR257W	58.1832656708066	64.4612887643676	79.4526860524893	85.5683104242676	89.3709627601884	96.8412342681396	122.831089753404	121.531521717598	150.484019820681	143.454316389364	56.9509757429944	59.5287036132296	79.1700877922718	69.7553072643315	93.2895620234648	88.523702266939	122.5838572687	111.555416200166	131.282349832774	144.948952660433	79.6944298612824	68.6124395705272	95.3140079855513	106.837987876466	114.066936564202	128.883174964965	138.84765488387	159.908724814961	100.418540346807	180.504963808352	55.6379386711885	49.6358149262472	68.2172006622685	76.2538997276055	120.907385442394	100.048372030838	138.838790853394	108.366442066022	139.25936256127	149.90713589607	60.499260665187	61.7519582394798	95.6015116056448	96.2889618139202	123.861143824126	137.308957118142	149.969486869273	141.531871049247	147.973255859821
YBR258C	33.8274800411666	22.052546156231	26.4842286841631	17.9417425083142	17.5927092047615	16.5155593325509	16.1813411651192	24.3063043435196	14.6575343981183	22.3151158827899	30.0574594199137	21.0101306870222	16.3503442179692	22.3743438395026	15.3352704696106	15.5304740819191	17.9249979968382	18.2663839392085	25.5062851103675	19.3634097065464	16.7777747076384	27.8738035755267	12.1308737436156	12.3614200848804	14.3781852812019	17.2730028303561	9.20074821519622	18.2946422457794	5.07164345185894	19.4265431901365	25.2899721232675	21.8981536439326	17.0543001655671	21.7868284936016	16.3388358705938	14.9605042289103	22.1337202809759	25.3831305740231	16.4803979362449	16.6563484328967	13.66112337601	29.0597450538728	19.4915703273645	16.9921697318683	19.3716480862378	9.96597269405867	12.1984750085055	17.5090974493914	14.5071819470413
YBR259W	6.76549600823333	7.63357366946458	3.92358943469083	8.28080423460654	7.0370836819046	7.50707242388679	8.09067058255958	7.11404029566428	9.77168959874555	13.389069529674	6.32788619366604	3.50168844783704	4.30272216262347	5.26455149164766	6.38969602900444	4.65914222457573	8.67338612750235	10.4379336795477	5.25129399331096	7.19212360528865	9.4374982730466	5.36034684144744	5.19894589012098	11.4784615073889	6.70981979789421	10.6295402032961	2.50929496778079	10.8412694789804	5.07164345185894	7.2849536963012	3.37199628310233	6.56944609317978	7.67443507450521	6.80838390425049	0	6.54522060014826	5.03039097294906	8.7864682756234	9.06421886493471	4.996904529869	5.85476716114713	5.44870219760116	6.49719010912149	6.60806600683766	5.28317675079212	7.75131209537897	7.89313088785648	5.83636581646381	8.70430916822479
YBR260C	12.17789281482	20.3561964519056	12.7516656627452	12.4212063519098	11.2593338910474	13.5127303629962	15.4458256576137	15.4137539739393	25.4063929567384	20.4023916642651	23.7295732262477	19.2592864631037	12.0476220553457	15.135585538487	21.7249664986151	17.083521490111	10.9862890948363	13.0474170994346	18.0044365484947	26.0022930345051	26.215272980685	11.7927630511844	9.53140079855513	22.9569230147778	18.2123680228557	14.6156177795321	46.0037410759811	12.8740075062892	20.2865738074358	42.0908435786291	20.231977698614	16.7885844603483	8.52715008278356	14.9784445893511	8.71404579765001	11.2203781716827	13.0790165296675	12.6915652870116	19.7764775234939	21.6532529627657	17.5643014834414	15.1352838822254	12.0662102026542	6.60806600683766	16.4365498913533	34.3272392795354	13.6335897153885	55.4454752564062	37.7186730623074
YBR261C	9.47169441152666	11.8744479302782	8.82807622805436	12.4212063519098	7.74079205009506	3.00282896955472	5.88412406004333	7.70687698696964	5.86301375924733	7.01332213459113	12.6557723873321	10.5050653435111	8.60544432524694	3.29034468227979	1.27793920580089	6.21218963276765	7.51693464383537	5.87133769474559	1.50036971237456	6.08564305062886	16.7777747076384	12.8648324194739	4.33245490843415	1.76591715498291	2.87563705624038	0	2.50929496778079	0	4.05731476148715	4.85663579753413	10.115988849307	13.1388921863596	3.41086003311343	6.12754551382544	9.80330152235626	7.48025211445516	6.03646916753887	5.85764551708226	4.12009948406123	6.66253937315867	15.6127124297257	15.1352838822254	0.928170015588784	1.88801885909648	2.93509819488451	2.21466059867971	1.435114706883	0	1.45071819470413
YBR262C	136.663019366313	166.242271023895	103.975120019307	118.691527362694	106.96367196495	99.0933559953057	83.8487678556174	92.4825238436357	97.7168959874555	100.099234102801	155.033211744818	211.852151094141	117.034042823358	117.13627068916	94.5675012292656	128.902934879929	104.080633530028	95.2461448258729	90.0221827424735	97.3702888100617	168.826357995611	241.215607865135	89.2485711137435	105.955029298975	67.0981979789421	98.3232468804886	107.063251958647	71.823410298245	140.991687961679	110.893184043696	158.48382530581	162.776275419899	123.643676200362	115.061687981833	114.371851094156	103.788498088065	120.729383350777	122.034281605881	114.538765656902	111.597534500408	178.570398414987	184.65046336315	92.8170015588784	111.393112686692	83.9438083736971	89.6937542465281	78.9313088785648	185.304614672726	145.071819470413
YBR263W	64.9487616790399	86.5138349205986	42.1785864229264	53.8252275249425	57.7040861916177	50.2973852400415	41.1888684203033	42.0914050826803	46.9041100739786	45.9053812445965	79.0985774208255	59.5287036132296	43.8877660587594	58.5681353445802	29.3926017334204	48.1444696539493	46.8362850885127	47.6230724129364	35.2586882408021	37.6203388584329	73.402764345918	115.783491775265	56.3219138096439	60.9241418469104	47.9272842706729	55.8050860673044	36.8029928607849	50.8184506827205	42.6018049956151	41.2814042790401	87.6719033606607	107.30095285527	53.7210455215365	48.3395257201785	39.213206089425	48.6216387439585	47.2856751457211	41.0035186195758	44.4970744278613	34.978331709083	90.7488909977805	86.5738238063295	44.5521607482616	56.6405657728943	65.1591799264362	39.8638907762347	41.6183264996069	35.0181948987828	37.7186730623074
YBR264C	44.65227365434	25.4452455648819	28.4460234015085	38.6437530948305	35.185418409523	48.7959707552642	27.9495892852058	29.0489978739625	22.4748860771148	20.4023916642651	28.4754878714972	31.5151960305333	39.5850438961359	51.3293770435647	53.6734466436373	34.1670429802221	26.5983841243405	24.1377216339541	26.2564699665548	32.6411763624639	19.9236074653206	30.0179423121057	36.3926212308468	33.5524259446753	46.010192899846	45.1755458640083	150.557698066847	35.9117051491225	127.805414986845	110.083744744107	32.0339646894722	29.9274766467079	45.1938954387529	36.7652730829527	33.7669274658938	37.4012605722758	35.2127368106434	23.4305820683291	18.9524576266817	29.981427179214	29.2738358057356	30.2705677644509	50.1211808417944	52.8645280547013	29.3509819488451	71.9764694570904	42.3358838530484	191.14098048919	120.409610160443
YBR265W	67.6549600823333	59.3722396513912	58.8538415203624	71.7669700332567	63.3337531371414	79.5749676932	75.7580972730578	68.7690561914214	63.5159823918461	70.1332213459113	49.0411180009118	56.0270151653926	63.6802880068273	59.2262042810362	61.3410818784426	71.4401807768279	73.4346692128532	78.2845025966078	60.7649733511696	60.3031902289587	45.0902695267782	66.4683008339482	76.251206388441	63.5730175793847	77.6422005184902	82.3789365755445	150.557698066847	64.370037531446	125.776757606102	128.700848634654	74.1839182282513	48.1759380166517	67.3644856539902	66.7221622616548	71.8908778306126	71.062395087324	82.4984119563645	80.0544887334576	60.9774723641062	69.956663418166	48.7897263428927	65.3844263712139	70.5409211847476	74.5767449343108	71.0293763162052	97.4450663419071	88.9771118267458	145.909145411595	123.311046549851
YBR267W	77.1266544938599	44.9532671646248	10.7898709453998	8.28080423460654	10.5556255228569	6.75636518149811	9.56170159757041	10.0782237521911	14.6575343981183	15.9393684877071	47.4591464524953	52.5253267175556	3.44217773009877	9.21296511038341	15.3352704696106	7.76523704095956	7.51693464383537	15.6569005193216	9.00221827424735	7.74536388261854	68.159709749781	52.5313990461849	6.93192785349464	7.06366861993164	8.62691116872113	11.9582327287081	5.8550215914885	14.906745533598	30.4298607111536	8.09439299589022	55.6379386711885	40.1466150138764	11.938010115897	13.616767808501	11.9818129717688	15.8955357432172	11.0668601404879	10.7390167813175	12.3602984521837	14.990713589607	35.1286029668828	58.7249014630347	12.0662102026542	12.2721225841271	14.6754909744226	12.1806332927384	19.3740485429205	17.5090974493914	20.3100547258578
YBR268W	43.2991744526933	37.3196934951602	39.2358943469083	33.1232169384262	25.3335012548566	29.2775824531585	33.0981978377437	36.1630381696268	40.0639273548568	34.4290359334473	31.6394309683302	36.7677287022889	33.561232868463	30.2711710769741	30.6705409392213	35.720090388414	35.2717702518429	27.3995759088127	39.0096125217385	34.8541374717835	38.7986040114138	50.3872603096059	29.4606933773522	37.0842602546411	47.9272842706729	38.5320832369482	286.05962632701	63.0148788465734	187.650807718781	299.492540847938	38.7779572556768	21.8981536439326	29.8450252897425	25.8718588361519	38.1239503647188	35.531197543662	32.194502226874	35.1458731024936	41.2009948406123	63.2941240450073	33.1770139131671	38.1409153832081	38.0549706391402	33.0403300341883	44.6134925622446	187.138820588435	96.1526853611608	414.38197296893	336.566621171359
YBR269C	146.13471377784	156.912347650105	216.778316266668	233.242652608084	199.853176566091	167.407715052675	187.556454413881	180.815190848134	193.479454055162	184.259099717894	142.377439357486	204.848774198467	209.112297103501	207.949783920083	199.358516104938	184.812641574837	179.828205710215	164.397455452876	171.792332066887	168.185044308288	168.826357995611	176.891445767765	171.565214373992	226.037395837812	258.807335061634	245.808117201222	273.513151488106	273.064475001818	220.109325810678	295.445344349993	144.9958401734	155.476890871921	213.178752069589	205.613193908365	189.530496098888	178.591019232617	220.331124615169	178.658188271009	182.108397195506	201.54181603805	160.030302404688	162.855654572746	242.252374068673	257.714574266669	238.329973424622	300.0865111211	255.450417825173	388.118326794843	284.34076616201
YBR270C	8.11859520987999	5.08904911297639	9.80897358672707	12.4212063519098	7.0370836819046	12.7620231206075	8.82618609006499	8.299713678275	11.7260275184947	6.37574739508284	9.49182929049907	7.00337689567408	8.60544432524694	11.1871719197513	10.2235136464071	12.4243792655353	10.4080633530028	3.91422512983039	8.25203341806007	8.85184443727834	7.3402764345918	4.28827747315795	10.397891780242	8.82958577491455	13.4196395957884	6.64346262706004	17.5650647744655	12.1964281638529	11.1576155940897	13.7604680930134	1.68599814155117	9.48919991237079	17.0543001655671	6.80838390425049	13.071068696475	7.48025211445516	9.0547037513083	3.90509701138818	7.41617907131022	6.66253937315867	5.85476716114713	4.23787948702312	14.8507202494205	12.2721225841271	8.80529458465354	11.0733029933985	7.89313088785648	13.1318230870436	14.5071819470413
YBR271W	20.2964880247	10.1780982259528	6.86628151070895	5.52053615640436	1.40741673638092	6.75636518149811	8.82618609006499	5.92836691305357	4.88584479937278	5.10059791606627	6.32788619366604	10.5050653435111	2.58163329757408	3.29034468227979	5.11175682320355	7.76523704095956	3.46935445100094	4.56659598480212	6.75166370568551	3.31944166397938	9.4374982730466	5.36034684144744	3.46596392674732	1.76591715498291	0.958545685413459	6.64346262706004	2.50929496778079	2.03273802730882	3.04298607111536	2.42831789876707	11.8019869908582	8.02932300277528	2.55814502483507	7.48922229467554	7.62479007294375	6.54522060014826	6.03646916753887	7.81019402277635	4.12009948406123	3.33126968657933	6.83056168800498	13.9244611716474	5.56902009353271	3.77603771819295	5.28317675079212	1.10733029933985	2.15267206032449	1.45909145411595	2.90143638940826
YBR272C	18.9433888230533	18.6598467475801	26.4842286841631	22.0821446256174	31.6668765685707	40.5381910889887	33.8337133452491	33.7916914044053	32.2465756758603	30.6035874963976	18.9836585809981	14.0067537913482	37.0034105985618	33.5615157592538	26.8367233218186	45.0383748375654	27.176609866174	30.0090593286997	36.7590579531767	34.8541374717835	13.6319419499562	5.36034684144744	38.1256031942205	30.0205916347095	45.0516472144326	30.5599280844762	33.4572662370772	33.2013877793774	27.3868746400383	42.0908435786291	11.8019869908582	22.6280920987303	30.6977402980208	31.3185659595523	38.1239503647188	25.2458508862862	24.1458766701555	27.3356790797172	32.9607958724899	28.3157923359243	9.75794526857855	14.5298725269364	33.4141205611962	35.872358322833	32.8730997827065	56.4738452663325	23.6793926635694	35.0181948987828	42.0708276464198
YBR273C	29.7681824362266	33.0788192343465	25.5033313254904	26.2225467429207	14.7778757319997	24.0226317564377	21.3299497176571	18.9707741217714	18.5662102376165	23.5902653618065	23.7295732262477	24.5118191348593	24.9557885432161	23.0324127759585	23.002905704416	17.083521490111	23.1290296733396	20.8758673590954	24.0059153979929	18.2569291518866	19.9236074653206	31.0900116803951	19.9292925787971	24.7228401697607	17.2538223374423	19.9303878811801	25.9293813337348	10.1636901365441	38.544490234128	18.6171038905475	35.4059609725745	37.9567996494832	23.0233052235156	27.914374007427	10.8925572470625	21.5057248290586	18.1094075026166	19.5254850569409	20.6004974203062	13.3250787463173	28.2980412788778	24.8218655668497	16.7070602805981	21.7122168796095	9.97933386260734	13.2879635920782	10.045802948181	32.1000119905509	29.0143638940826
YBR274W	12.17789281482	27.1415952692074	32.3696128361993	38.6437530948305	24.6297928866661	29.2775824531585	36.7757753752708	40.9057317000696	34.2009135956094	28.0532885383645	25.3115447746642	22.7609749109407	31.8401440034137	28.2969642676062	17.8911488812124	27.9548533474544	38.7411247028438	42.4041055731626	36.7590579531767	33.7476569171237	16.7777747076384	21.4413873657898	38.9920941759073	36.2013016771496	44.0931015290191	45.1755458640083	34.2936978930041	37.266863833995	38.544490234128	39.6625256798621	10.115988849307	22.6280920987303	31.5504553062992	34.7227579116775	39.213206089425	28.0509454292068	44.2674405619517	30.2645018382584	36.2568754597388	36.6439665523727	21.4674795908728	18.1623406586705	38.0549706391402	27.3762734568989	39.9173354504294	34.3272392795354	40.1832117927239	35.0181948987828	34.8172366728992
YBR275C	12.17789281482	6.78539881730185	28.4460234015085	26.2225467429207	30.9631682003802	32.2804114227132	16.9168566726246	29.0489978739625	24.4292239968639	30.6035874963976	7.90985774208256	5.25253267175556	24.0952441106914	17.1097923478549	23.002905704416	18.6365688983029	20.2379009641722	23.4853507789824	28.5070245351166	27.1087735891649	9.4374982730466	5.36034684144744	31.1936753407259	40.6160945646069	32.5905533040576	18.6016953557681	109.572546926428	41.3323398886127	64.9170361837945	93.8949587523265	8.42999070775583	7.29938454797753	22.1705902152373	23.1485052744517	15.2495801458875	25.2458508862862	32.194502226874	19.5254850569409	20.6004974203062	39.975236238952	5.85476716114713	2.42164542115607	35.2704605923738	23.6002357387059	27.0029033929375	77.5131209537897	51.6641294477879	105.054584696349	84.1416552928396
YBR276C	24.35578562964	16.9634970432546	69.6437124657622	88.3285785024697	69.6671284508555	57.0537504215396	54.4281475554008	49.79828206965	54.7214617529751	59.9320255137787	34.8033740651632	29.7643518066148	52.4932103840063	64.4907557726839	51.1175682320355	38.8261852047978	44.5233821211787	61.9752312223145	55.5136793578587	55.3240277329896	28.3124948191398	21.4413873657898	37.2591122125337	43.2649702970813	22.0465507645096	25.2451579828282	27.6022446455887	22.360118300397	18.2579164266922	32.3775719835609	40.463955397228	18.9783998247416	69.9226306788252	50.3820408914537	65.355343482375	61.7120799442551	52.3160661186702	42.9560671252699	45.3210943246735	43.3065059255313	19.5158905371571	25.4272769221387	32.4859505456075	39.648396041026	16.4365498913533	27.6832574834963	18.656491189479	36.4772863528988	26.1129275046744
YBR278W	35.1805792428133	26.2934204170447	63.758328313726	93.8491146588741	90.0746711283789	70.5664807845359	81.6422213331012	61.6550158957571	65.4703203115952	58.6568760347621	31.6394309683302	33.2660402544519	58.5170214116792	79.6263413111709	72.8425347306506	72.9932281850198	74.5911206965202	68.4989397720319	54.0133096454841	45.3657027410515	29.3611057383672	22.5134567340792	78.8506793335015	69.7537276218249	57.5127411248075	77.0641664738965	51.0223310115427	65.0476168738823	32.4585180918972	57.4701902708206	23.6039739817163	21.1682151891348	64.8063406291551	88.5089907552564	82.7834350776751	62.6471114585619	84.5105683455442	77.1256659749165	51.9132534991715	76.6192027913247	29.2738358057356	27.2435109880058	74.2536012471028	80.2408015116002	65.7461995654131	65.3324876610513	61.7099323959688	53.9863838022902	53.6765732040529
YBR279W	28.41508323458	33.9269940865093	17.6561524561087	12.4212063519098	18.296417572952	19.5183883021057	8.82618609006499	17.1922640478554	12.7031964783692	14.6642190086905	23.7295732262477	28.0135075826963	18.9319775155433	13.1613787291192	8.94557444060621	4.65914222457573	16.1903207713377	20.8758673590954	15.0036971237456	17.7036888745567	39.8472149306412	31.0900116803951	16.4633286520498	16.7762129723376	22.0465507645096	17.2730028303561	10.8736115270501	20.3273802730882	29.4155320207819	20.2359824897255	35.4059609725745	45.9861226522584	12.7907251241753	14.9784445893511	10.8925572470625	19.6356618004448	20.1215638917962	11.7152910341645	22.2485372139306	13.3250787463173	43.9107537086035	46.0112630019653	18.5634003117757	13.2161320136753	20.5456873641916	21.0392756874572	15.786261775713	13.1318230870436	15.9579001417455
YBR280C	21.6495872263466	48.3459665732757	97.108838508598	114.55112524539	61.9263364007605	64.5608228454264	63.2543336454658	60.4693425131464	64.4931513517206	72.0459455644361	36.3853456135798	35.0168844783704	109.289142930636	109.239443451689	81.7881091712568	59.0158015112926	64.1830573435174	67.8465689170601	86.2712584615371	63.0693916156081	46.1388804460056	37.5224278901321	84.9161162053093	100.657277834026	96.8131142267593	70.4207038468364	48.5130360437619	71.823410298245	53.7594205897048	45.3286007769852	45.5219498218815	50.365753381045	111.705666084465	100.083243392482	68.6231106564938	78.5426472017791	71.4315518158766	80.0544887334576	72.5137509194777	73.2879331047453	45.8623427623192	31.4813904750289	103.026871730355	84.9608486593414	81.5957298177895	36.5418998782151	43.0534412064899	52.5272923481743	49.3244186199405
YBR281C	12.17789281482	7.63357366946458	24.5224339668177	17.9417425083142	43.6299188278085	53.3002142095962	39.7178374052925	37.9415482435428	41.0410963147313	38.8920591100053	9.49182929049907	22.7609749109407	16.3503442179692	27.6388953311502	26.8367233218186	38.8261852047978	41.6322534120113	35.8803970234453	29.2572093913039	41.4930207997422	13.6319419499562	10.7206936828949	37.2591122125337	23.8398815922693	49.8443756414999	43.8468533385963	30.1115396133695	48.7857126554117	15.2149303555768	31.5681326839719	15.1739832739605	5.10956918358427	20.4651601986806	31.3185659595523	32.6776717411875	36.4662290579689	40.2431277835925	41.0035186195758	51.9132534991715	21.6532529627657	13.66112337601	12.1082271057804	41.7676507014953	27.3762734568989	44.0264729232677	27.6832574834963	35.8778676720749	27.7227376282031	27.5636456993785
YBR282W	16.23719041976	22.052546156231	22.5606392494723	12.4212063519098	19.7038343093329	19.5183883021057	21.3299497176571	23.1206309609089	30.2922377561112	32.5163117149225	28.4754878714972	17.5084422391852	19.792521948068	20.4001370301347	29.3926017334204	29.5079007556463	31.2241900590085	22.8329799240106	38.2594276655513	27.1087735891649	31.458327576822	32.1620810486846	23.3952565055444	18.5421301273205	40.2589187873653	22.5877729320041	92.8439138078891	29.1359117247598	94.3325682045763	59.8985081695876	18.5459795570628	18.9783998247416	20.4651601986806	16.3401213702012	26.14213739295	20.5706933147517	27.1641112539249	26.3594048268702	29.6647162852409	38.3096013956623	19.5158905371571	30.2705677644509	31.5577805300187	14.1601414432236	35.2211783386142	60.9031664636919	55.2519162149954	107.97276760458	95.7474008504727
YBR283C	73.0673568889199	54.2831905384148	70.6246098244349	63.4861657986501	86.5561292874266	84.0792111475321	83.8487678556174	107.30344112627	149.506850860807	135.803419515265	63.2788619366604	68.2829247328222	77.4489989272224	76.3359966288911	85.6219267886594	83.8645600423632	100.033053337194	112.207787055138	157.538819799329	160.43968042567	73.402764345918	58.9638152559218	90.1150620954303	77.700354819248	166.786949261942	110.281479609197	295.260374542206	178.20336706074	169.392891292089	202.359824897255	47.2079479634327	86.1327376661348	57.9846205629282	63.9988086999546	81.6941793529688	89.7630253734619	105.63821043193	112.27153907741	124.427004418649	174.891658545415	69.2814114069077	84.7575897404625	74.2536012471028	82.1288203706967	127.383261657988	234.754023460049	174.366436886284	170.713700131566	166.832592390975
YBR284W	16.23719041976	12.722622782441	9.80897358672707	1.38013403910109	9.85191715466644	6.00565793910943	11.0327326125812	11.2638971348018	12.7031964783692	11.4763453111491	6.32788619366604	7.00337689567408	9.46598875777163	7.23875830101554	5.11175682320355	3.10609481638382	10.4080633530028	11.0903045345194	6.75166370568551	9.95832499193813	6.2916655153644	22.5134567340792	7.79841883518147	5.29775146494873	7.66836548330767	13.2869252541201	10.8736115270501	12.8740075062892	6.08597214223073	8.90383229547924	20.231977698614	16.7885844603483	7.67443507450521	6.80838390425049	8.71404579765001	8.41528362876205	15.0911729188472	7.81019402277635	7.41617907131022	6.66253937315867	15.6127124297257	12.1082271057804	12.0662102026542	9.44009429548238	18.7846284472609	15.5026241907579	10.045802948181	11.6727316329276	14.5071819470413
YBR285W	131.250622559727	177.268544102011	120.650375116743	122.831929479997	102.037713387617	106.600428419192	141.954492948545	125.681378556736	207.159819493406	162.581558574612	143.959410905903	197.845397302793	145.432009096673	123.058891117264	122.682163756885	150.645598594615	130.100791912535	128.517058429431	225.055456856184	170.398005417608	104.86109192274	128.648324194739	159.434340630377	126.263076581278	208.004413734721	136.855330117437	1417.75165679614	256.124991440911	1613.79694638152	946.234541219566	144.9958401734	270.807166729966	110.000236067908	148.422769112661	124.175152616513	110.333718688214	135.820556269625	170.847994248233	156.563780394327	308.142446008588	182.473576522419	87.1792351616185	151.291712540972	118.00117869353	139.123654437526	754.09193385044	355.908447306983	1930.3779937954	1218.60328355147
YBR286W	127.191324954787	189.142992032289	247.186134385522	248.424127038196	194.223509620567	174.914787476562	124.302120768415	158.28739657853	149.506850860807	140.266442691823	158.197154841651	162.828512824422	254.721152027309	279.679297993782	172.52179278312	167.729120084726	168.841916615379	187.882806231859	129.781980120399	154.354037375041	149.951361449518	144.729364719081	274.677641194725	259.589821782488	230.05096449923	196.646493760977	215.799367229148	163.974200869578	608.597214223073	162.697299217393	214.121763976998	237.959936264067	266.899797591126	245.101820553018	172.102404503588	197.291649518755	153.929963772241	170.847994248233	133.491223283584	114.928804186987	190.279932737282	119.266036991936	248.749564177794	260.546602555314	196.651579057262	164.992214601638	135.618339800443	351.641040441944	211.804856426803
YBR287W	94.7169441152666	126.378052972247	40.216791705581	46.9245573294371	35.185418409523	33.0311186651019	32.3626823302383	23.1206309609089	34.2009135956094	27.4157137988562	93.3363213565741	119.057407226459	30.979599570889	40.1422051238134	35.7822977624248	31.0609481638382	34.1153187681759	43.0564764281343	22.5055456856184	31.5346958078041	72.3541534266906	118.999699880133	36.3926212308468	44.1479288745727	29.7149162478172	26.5738505082402	44.3308777641272	27.7807530398872	81.1462952297431	28.3303754856158	109.589879200826	140.148183321169	50.310185488423	40.850303425503	35.9454389153063	46.7515757153447	27.1641112539249	34.1695988496465	30.4887361820531	51.6346801419797	129.780672072095	87.1792351616185	39.9113106703177	32.0963206046401	28.7639623098682	35.4345695788753	31.5725235514259	52.5272923481743	46.4229822305322
YBR288C	36.53367844446	35.6233437908347	26.4842286841631	24.8424127038196	29.5557514639993	37.535362119434	31.6271668227329	33.1988547131	36.1552515153585	32.5163117149225	33.2214025167467	43.771105597963	26.6768774082655	25.0066195853264	26.8367233218186	13.9774266737272	28.333061349841	32.6185427485866	26.2564699665548	35.9606180264432	39.8472149306412	35.3782891535531	22.5287655238576	22.0739644372864	32.5905533040576	23.9164654574162	38.4758561726387	28.4583323823235	40.5731476148715	23.4737396880816	20.231977698614	29.1975381919101	23.0233052235156	23.1485052744517	25.0528816682438	35.531197543662	25.1519548647453	25.3831305740231	22.2485372139306	33.3126968657933	43.9107537086035	38.1409153832081	26.9169304520747	24.5442451682542	32.8730997827065	36.5418998782151	27.2671794307769	26.2636461740871	18.8593365311537
YBR289W	43.2991744526933	45.8014420167875	37.2740996295629	38.6437530948305	46.4447523005704	52.5495069672075	53.6926320478954	50.9839554522607	48.8584479937278	45.2678065050882	36.3853456135798	59.5287036132296	40.4455883286606	39.4841361873575	39.6161153798275	46.5914222457573	47.9927365721797	61.9752312223145	36.0088730969894	40.9397805224123	40.8958258498686	49.3151909413164	46.7905130110888	29.137633057218	48.8858299560864	66.4346262706004	39.3122878285657	42.009919231049	42.6018049956151	33.9964505827389	55.6379386711885	51.0956918358427	33.2558853228559	33.3610811308274	46.8379961623688	42.0764181438103	44.2674405619517	57.6001809179756	42.0250147374246	41.6408710822417	63.4266442457605	40.5625608043642	34.342290576785	40.5924054705742	51.0707085909905	53.1518543683129	40.1832117927239	40.8545607152467	42.0708276464198
YBR290W	55.4770672675133	64.4612887643676	45.1212784989445	41.4040211730327	34.4817100413325	38.2860693618226	41.1888684203033	28.4561611826571	42.0182652746059	29.3284380173811	60.1149188398274	54.2761709414741	32.7006884359384	44.0906187425492	30.6705409392213	32.6139955720301	33.5370930263424	37.1851387333887	39.7597973779258	35.4073777491133	65.0138769920988	82.5493413582905	34.6596392674732	39.7331359871155	39.3003731019518	42.5181608131843	110.408978582355	48.7857126554117	53.7594205897048	101.989351748217	85.9859052191095	60.5848917482135	37.5194603642477	40.850303425503	37.0346946400125	41.1413866295034	36.2188150052332	38.0746958610347	41.2009948406123	44.972140768821	65.3782332994763	59.9357241736128	49.1930108262056	35.872358322833	37.5692568945218	85.2644330491687	53.0992441546709	102.136401788117	91.3952462663603
YBR291C	29.7681824362266	14.4189724867664	23.541536608145	30.362948860224	27.4446263594279	18.767681059717	27.2140737777004	10.6710604434964	20.5205481573657	19.7648169247568	22.1476016778312	21.0101306870222	31.8401440034137	23.6904817124145	31.9484801450222	23.2957111228787	17.3467722550047	23.4853507789824	18.754621404682	18.8101694292165	22.0208293037754	18.2251792609213	24.2617474872312	22.9569230147778	17.2538223374423	26.5738505082402	39.3122878285657	30.4910704096323	31.4441894015254	33.9964505827389	28.6619684063698	23.3580305535281	32.4031703145775	17.7017981510513	26.14213739295	27.1159139148999	29.1762676431045	15.6203880455527	22.2485372139306	26.6501574926347	19.5158905371571	16.3461065928035	26.9169304520747	20.7682074500612	24.6548248370299	27.6832574834963	20.8091632498034	46.6909265317105	44.9722640358281
YBR292C	4.05929760494	5.08904911297639	10.7898709453998	12.4212063519098	11.2593338910474	13.5127303629962	13.2392791350975	10.0782237521911	9.77168959874555	8.28847161360769	3.16394309683302	3.50168844783704	16.3503442179692	17.1097923478549	14.0573312638098	15.5304740819191	5.20403167650141	8.48082111463252	12.7531425551838	5.53240277329896	8.3888873538192	4.28827747315795	23.3952565055444	11.4784615073889	7.66836548330767	14.6156177795321	15.8922014626117	14.2291661911617	37.5301615437562	11.3321501942463	3.37199628310233	8.02932300277528	11.938010115897	14.297606198926	6.5355343482375	6.54522060014826	6.03646916753887	3.90509701138818	6.59215917449797	9.993809059738	7.80635621486284	6.6595249081792	7.42536012471027	12.2721225841271	8.80529458465354	11.0733029933985	9.32824559473948	16.0500059952755	11.6057455576331
YBR293W	17.5902896214067	6.78539881730185	23.541536608145	15.181474430112	17.5927092047615	9.75919415105283	14.7103101501083	13.6352439000232	14.6575343981183	10.8387705716408	11.0738008389156	17.5084422391852	15.4897997854445	16.4517234113989	11.501452852208	21.7426637146868	14.4556435458373	12.3950462444629	14.2535122675583	16.043968042567	13.6319419499562	12.8648324194739	12.9973647253024	16.7762129723376	12.461093910375	14.6156177795321	44.3308777641272	14.2291661911617	73.0316657067688	18.6171038905475	13.4879851324093	9.48919991237079	11.938010115897	8.85089907552564	23.9636259435375	10.2853466573758	16.097251113437	14.6441137927057	9.06421886493471	8.32817421644833	4.87897263428927	17.5569293033815	12.0662102026542	9.44009429548238	11.7403927795381	8.85864239471882	8.61068824129798	24.8045547199712	20.3100547258578
YBR294W	6.76549600823333	5.08904911297639	7.84717886938166	9.66093827370763	9.14820878647598	11.2606086358302	22.0654652251625	23.7134676522143	39.0867583949822	29.3284380173811	3.16394309683302	1.75084422391852	2.58163329757408	2.63227574582383	12.7793920580089	17.083521490111	27.176609866174	20.8758673590954	30.0073942474912	29.3217346984845	4.1944436769096	6.43241620973693	6.93192785349464	6.18071004244018	15.3367309666153	9.30084767788406	13.3829064948309	14.906745533598	12.1719442844615	15.3793466921914	1.68599814155117	5.10956918358427	9.37986509106192	4.76586873297535	13.071068696475	10.2853466573758	24.1458766701555	29.2882275854113	24.7205969043674	19.987618119476	2.92738358057356	3.02705677644509	4.64085007794392	11.3281131545789	12.9144320574919	11.0733029933985	9.32824559473948	7.29545727057976	7.25359097352066
[truncated: 5,115 more rows]
[truncated: 88 more columns]
